# Supplementary material for: A single cysteine residue in vimentin regulates long non-coding RNA XIST to suppress epithelial–mesenchymal transition and stemness in breast cancer
Source: eLife. 2025 Jul 21;14:RP104191. doi: 10.7554/eLife.104191 (PMC12279371; doi:10.7554/eLife.104191)
Supplement: Figure 3—figure supplement 1—source data 1. [file elife-104191-fig3-figsupp1-data1.xlsx]

## Sheet: Figure 3-figure supplement 1-so
ALL UPREGULATED CELLULAR FUNCTIONS BY GO PATHWAY
Category	GOID	Description	GeneRatio	BgRatio	pvalue	padj	geneID	geneName	Count
BP	GO:0007389	pattern specification process	137|2417	385|14725	1.71178e-20	9.62191e-17	ENSG00000101871/ENSG00000152661/ENSG00000147257/ENSG00000170689/ENSG00000162738/ENSG00000116729/ENSG00000184058/ENSG00000148516/ENSG00000128602/ENSG00000253293/ENSG00000106004/ENSG00000074047/ENSG00000105997/ENSG00000005073/ENSG00000131668/ENSG00000146122/ENSG00000128714/ENSG00000128918/ENSG00000125931/ENSG00000052850/ENSG00000120068/ENSG00000114251/ENSG00000106006/ENSG00000183072/ENSG00000128710…	MID1/GJA1/GPC3/HOXB9/VANGL2/WLS/TBX1/ZEB1/SMO/HOXA10/HOXA5/GLI2/HOXA3/HOXA11/BARX1/DAAM2/HOXD13/ALDH1A2/CITED1/ALX4/HOXB8/WNT5A/HOXA6/NKX2-5/HOXD10/HOXB6/CDX2/ISL1/HOXD11/TBX18/LEF1/ZEB2/HOXB3/GPR161/PAX6/FOXG1/SIX2/BICC1/NKX6-1/FOXF1/PCSK5/DCHS1/HOXB4/HOXC10/EN1/WT1/ALX1/HOXD9/PTCH1/FOXC1/DLL3/FOXB1/INTU/HAND1/HAND2/NKD1/ARMC4/LBX1/PAX7/MEF2C/SEMA3A/PITX2/EYA1/TBC1D32/HOXB5/DMRTA2/SP8/SFRP1/DYNC…	137
BP	GO:0003002	regionalization	113|2417	300|14725	2.88717e-19	8.11439e-16	ENSG00000147257/ENSG00000170689/ENSG00000162738/ENSG00000116729/ENSG00000184058/ENSG00000128602/ENSG00000253293/ENSG00000106004/ENSG00000074047/ENSG00000105997/ENSG00000005073/ENSG00000131668/ENSG00000128714/ENSG00000128918/ENSG00000052850/ENSG00000120068/ENSG00000114251/ENSG00000106006/ENSG00000183072/ENSG00000128710/ENSG00000108511/ENSG00000165556/ENSG00000016082/ENSG00000128713/ENSG00000112837…	GPC3/HOXB9/VANGL2/WLS/TBX1/SMO/HOXA10/HOXA5/GLI2/HOXA3/HOXA11/BARX1/HOXD13/ALDH1A2/ALX4/HOXB8/WNT5A/HOXA6/NKX2-5/HOXD10/HOXB6/CDX2/ISL1/HOXD11/TBX18/LEF1/ZEB2/HOXB3/GPR161/PAX6/FOXG1/SIX2/NKX6-1/FOXF1/PCSK5/HOXB4/HOXC10/EN1/WT1/ALX1/HOXD9/PTCH1/FOXC1/DLL3/FOXB1/INTU/NKD1/PAX7/MEF2C/SEMA3A/PITX2/TBC1D32/HOXB5/DMRTA2/SP8/SFRP1/DYNC2H1/HOXC4/PAX2/PAX1/DLX2/EMX2/TBX20/LRP4/NKX2-2/HOXA7/CDON/ATM/NKX2-…	113
BP	GO:0009952	anterior/posterior pattern specification	75|2417	182|14725	1.16405e-15	2.18104e-12	ENSG00000147257/ENSG00000170689/ENSG00000162738/ENSG00000116729/ENSG00000184058/ENSG00000128602/ENSG00000253293/ENSG00000106004/ENSG00000074047/ENSG00000105997/ENSG00000005073/ENSG00000131668/ENSG00000128714/ENSG00000128918/ENSG00000052850/ENSG00000120068/ENSG00000114251/ENSG00000106006/ENSG00000128710/ENSG00000108511/ENSG00000165556/ENSG00000112837/ENSG00000138795/ENSG00000169554/ENSG00000120093…	GPC3/HOXB9/VANGL2/WLS/TBX1/SMO/HOXA10/HOXA5/GLI2/HOXA3/HOXA11/BARX1/HOXD13/ALDH1A2/ALX4/HOXB8/WNT5A/HOXA6/HOXD10/HOXB6/CDX2/TBX18/LEF1/ZEB2/HOXB3/PAX6/SIX2/FOXF1/PCSK5/HOXB4/HOXC10/EN1/WT1/ALX1/HOXD9/FOXC1/DLL3/FOXB1/NKD1/HOXB5/SFRP1/HOXC4/PAX1/EMX2/HOXA7/CDON/ATM/HOXA2/MSX1/HOXB2/PLXNA2/RIPPLY2/ROR2/OTX2/PGAP1/FOXC2/ZIC3/ZBTB16/TSHZ1/KIF3A/ACVR2B/SIX3/HOXD8/NOG/PRKDC/TBXT/HOXD3/SCMH1/OSR1/RNF2/W…	75
BP	GO:0048562	embryonic organ morphogenesis	95|2417	276|14725	1.41441e-13	1.9876e-10	ENSG00000152661/ENSG00000162738/ENSG00000138829/ENSG00000184058/ENSG00000148516/ENSG00000128602/ENSG00000106004/ENSG00000074047/ENSG00000105997/ENSG00000005073/ENSG00000052850/ENSG00000136630/ENSG00000120068/ENSG00000114251/ENSG00000106006/ENSG00000183072/ENSG00000128710/ENSG00000103449/ENSG00000108511/ENSG00000077092/ENSG00000137273/ENSG00000105991/ENSG00000120093/ENSG00000007372/ENSG00000122691…	GJA1/VANGL2/FBN2/TBX1/ZEB1/SMO/HOXA5/GLI2/HOXA3/HOXA11/ALX4/HLX/HOXB8/WNT5A/HOXA6/NKX2-5/HOXD10/SALL1/HOXB6/RARB/FOXF2/HOXA1/HOXB3/PAX6/TWIST1/FOXG1/SIX2/FOXF1/HOXB4/TCF7/DLX6/ALX1/HOXD9/MYO3A/DLX5/PROX1/USH1C/HAND1/HAND2/LBX1/MEF2C/PITX2/EYA1/HOXB5/ITGA8/HOXC4/PAX2/FOXE1/SHOX2/DLX2/BBS7/COL2A1/SOBP/TBX20/SATB2/PRRX1/MFAP2/HOXA7/NKX3-2/HOXA2/MSX1/HOXB2/ROR2/FOXN4/FLVCR1/CEP290/SIX1/FOXC2/SPRY2/ZI…	95
BP	GO:0007423	sensory organ development	140|2417	479|14725	7.48603e-13	8.41579e-10	ENSG00000152661/ENSG00000198732/ENSG00000162738/ENSG00000138829/ENSG00000184058/ENSG00000050555/ENSG00000148516/ENSG00000074047/ENSG00000128573/ENSG00000177707/ENSG00000128918/ENSG00000114251/ENSG00000055732/ENSG00000103449/ENSG00000187498/ENSG00000077092/ENSG00000137273/ENSG00000138795/ENSG00000169554/ENSG00000105991/ENSG00000153291/ENSG00000185483/ENSG00000007372/ENSG00000166402/ENSG00000122691…	GJA1/SMOC1/VANGL2/FBN2/TBX1/LAMC3/ZEB1/GLI2/FOXP2/NECTIN3/ALDH1A2/WNT5A/MCOLN3/SALL1/COL4A1/RARB/FOXF2/LEF1/ZEB2/HOXA1/SLC25A27/ROR1/PAX6/TUB/TWIST1/FOXG1/SIX2/MAF/DCHS1/DLX6/GSDME/SOX8/ESRRB/WT1/EYA4/CDH23/SERPINF1/FOXC1/MYO3A/DLX5/VAX1/PROX1/USH1C/BNC2/HAND2/COL5A2/NKD1/CECR2/PITX2/EYA1/TBC1D32/KIT/ITGA8/PTPRM/NPHP1/PAX2/LGR5/EPHB1/DLX2/SH3PXD2B/MERTK/CHRDL1/MYH10/BBS7/MAB21L1/COL2A1/SOBP/MYOM2…	140
BP	GO:0048736	appendage development	63|2417	165|14725	1.23672e-11	9.93088e-09	ENSG00000152661/ENSG00000147257/ENSG00000198732/ENSG00000138829/ENSG00000253293/ENSG00000074047/ENSG00000005073/ENSG00000128714/ENSG00000128918/ENSG00000052850/ENSG00000114251/ENSG00000128710/ENSG00000103449/ENSG00000077092/ENSG00000138795/ENSG00000122691/ENSG00000099139/ENSG00000180818/ENSG00000006377/ENSG00000163064/ENSG00000180318/ENSG00000128709/ENSG00000185920/ENSG00000105880/ENSG00000164066…	GJA1/GPC3/SMOC1/FBN2/HOXA10/GLI2/HOXA11/HOXD13/ALDH1A2/ALX4/WNT5A/HOXD10/SALL1/RARB/LEF1/TWIST1/PCSK5/HOXC10/DLX6/EN1/ALX1/HOXD9/PTCH1/DLX5/INTU/HAND2/MYH3/PITX2/TBC1D32/SP8/DYNC2H1/SHOX2/BBS7/COL2A1/RNF165/LRP4/RECK/PRRX1/COMP/SP9/MSX1/PLXNA2/RPGRIP1L/ROR2/RSPO4/CYP26B1/FLVCR1/HDAC2/ZBTB16/ITGA6/NOG/FGF9/WDR19/MED31/TRAF3IP1/HDAC1/OSR1/CACNA1C/PAM/MED1/RDH10/ASPH/TBX3	63
BP	GO:0060173	limb development	63|2417	165|14725	1.23672e-11	9.93088e-09	ENSG00000152661/ENSG00000147257/ENSG00000198732/ENSG00000138829/ENSG00000253293/ENSG00000074047/ENSG00000005073/ENSG00000128714/ENSG00000128918/ENSG00000052850/ENSG00000114251/ENSG00000128710/ENSG00000103449/ENSG00000077092/ENSG00000138795/ENSG00000122691/ENSG00000099139/ENSG00000180818/ENSG00000006377/ENSG00000163064/ENSG00000180318/ENSG00000128709/ENSG00000185920/ENSG00000105880/ENSG00000164066…	GJA1/GPC3/SMOC1/FBN2/HOXA10/GLI2/HOXA11/HOXD13/ALDH1A2/ALX4/WNT5A/HOXD10/SALL1/RARB/LEF1/TWIST1/PCSK5/HOXC10/DLX6/EN1/ALX1/HOXD9/PTCH1/DLX5/INTU/HAND2/MYH3/PITX2/TBC1D32/SP8/DYNC2H1/SHOX2/BBS7/COL2A1/RNF165/LRP4/RECK/PRRX1/COMP/SP9/MSX1/PLXNA2/RPGRIP1L/ROR2/RSPO4/CYP26B1/FLVCR1/HDAC2/ZBTB16/ITGA6/NOG/FGF9/WDR19/MED31/TRAF3IP1/HDAC1/OSR1/CACNA1C/PAM/MED1/RDH10/ASPH/TBX3	63
BP	GO:0035107	appendage morphogenesis	56|2417	140|14725	1.98438e-11	1.15184e-08	ENSG00000152661/ENSG00000147257/ENSG00000138829/ENSG00000253293/ENSG00000074047/ENSG00000005073/ENSG00000128714/ENSG00000128918/ENSG00000052850/ENSG00000114251/ENSG00000128710/ENSG00000103449/ENSG00000077092/ENSG00000138795/ENSG00000122691/ENSG00000099139/ENSG00000180818/ENSG00000006377/ENSG00000163064/ENSG00000180318/ENSG00000128709/ENSG00000185920/ENSG00000105880/ENSG00000164066/ENSG00000164107…	GJA1/GPC3/FBN2/HOXA10/GLI2/HOXA11/HOXD13/ALDH1A2/ALX4/WNT5A/HOXD10/SALL1/RARB/LEF1/TWIST1/PCSK5/HOXC10/DLX6/EN1/ALX1/HOXD9/PTCH1/DLX5/INTU/HAND2/MYH3/PITX2/TBC1D32/SP8/DYNC2H1/SHOX2/COL2A1/RNF165/LRP4/RECK/PRRX1/SP9/MSX1/PLXNA2/RPGRIP1L/ROR2/CYP26B1/FLVCR1/HDAC2/ZBTB16/NOG/FGF9/WDR19/TRAF3IP1/HDAC1/OSR1/CACNA1C/MED1/RDH10/ASPH/TBX3	56
BP	GO:0035108	limb morphogenesis	56|2417	140|14725	1.98438e-11	1.15184e-08	ENSG00000152661/ENSG00000147257/ENSG00000138829/ENSG00000253293/ENSG00000074047/ENSG00000005073/ENSG00000128714/ENSG00000128918/ENSG00000052850/ENSG00000114251/ENSG00000128710/ENSG00000103449/ENSG00000077092/ENSG00000138795/ENSG00000122691/ENSG00000099139/ENSG00000180818/ENSG00000006377/ENSG00000163064/ENSG00000180318/ENSG00000128709/ENSG00000185920/ENSG00000105880/ENSG00000164066/ENSG00000164107…	GJA1/GPC3/FBN2/HOXA10/GLI2/HOXA11/HOXD13/ALDH1A2/ALX4/WNT5A/HOXD10/SALL1/RARB/LEF1/TWIST1/PCSK5/HOXC10/DLX6/EN1/ALX1/HOXD9/PTCH1/DLX5/INTU/HAND2/MYH3/PITX2/TBC1D32/SP8/DYNC2H1/SHOX2/COL2A1/RNF165/LRP4/RECK/PRRX1/SP9/MSX1/PLXNA2/RPGRIP1L/ROR2/CYP26B1/FLVCR1/HDAC2/ZBTB16/NOG/FGF9/WDR19/TRAF3IP1/HDAC1/OSR1/CACNA1C/MED1/RDH10/ASPH/TBX3	56
BP	GO:0030326	embryonic limb morphogenesis	51|2417	122|14725	2.25409e-11	1.15184e-08	ENSG00000152661/ENSG00000147257/ENSG00000138829/ENSG00000253293/ENSG00000074047/ENSG00000005073/ENSG00000128714/ENSG00000128918/ENSG00000052850/ENSG00000114251/ENSG00000128710/ENSG00000103449/ENSG00000077092/ENSG00000138795/ENSG00000122691/ENSG00000180818/ENSG00000006377/ENSG00000163064/ENSG00000180318/ENSG00000128709/ENSG00000185920/ENSG00000105880/ENSG00000164066/ENSG00000164107/ENSG00000109063…	GJA1/GPC3/FBN2/HOXA10/GLI2/HOXA11/HOXD13/ALDH1A2/ALX4/WNT5A/HOXD10/SALL1/RARB/LEF1/TWIST1/HOXC10/DLX6/EN1/ALX1/HOXD9/PTCH1/DLX5/INTU/HAND2/MYH3/PITX2/TBC1D32/SP8/DYNC2H1/SHOX2/LRP4/RECK/PRRX1/SP9/MSX1/RPGRIP1L/ROR2/CYP26B1/FLVCR1/HDAC2/ZBTB16/NOG/FGF9/WDR19/TRAF3IP1/HDAC1/OSR1/CACNA1C/MED1/RDH10/TBX3	51
BP	GO:0035113	embryonic appendage morphogenesis	51|2417	122|14725	2.25409e-11	1.15184e-08	ENSG00000152661/ENSG00000147257/ENSG00000138829/ENSG00000253293/ENSG00000074047/ENSG00000005073/ENSG00000128714/ENSG00000128918/ENSG00000052850/ENSG00000114251/ENSG00000128710/ENSG00000103449/ENSG00000077092/ENSG00000138795/ENSG00000122691/ENSG00000180818/ENSG00000006377/ENSG00000163064/ENSG00000180318/ENSG00000128709/ENSG00000185920/ENSG00000105880/ENSG00000164066/ENSG00000164107/ENSG00000109063…	GJA1/GPC3/FBN2/HOXA10/GLI2/HOXA11/HOXD13/ALDH1A2/ALX4/WNT5A/HOXD10/SALL1/RARB/LEF1/TWIST1/HOXC10/DLX6/EN1/ALX1/HOXD9/PTCH1/DLX5/INTU/HAND2/MYH3/PITX2/TBC1D32/SP8/DYNC2H1/SHOX2/LRP4/RECK/PRRX1/SP9/MSX1/RPGRIP1L/ROR2/CYP26B1/FLVCR1/HDAC2/ZBTB16/NOG/FGF9/WDR19/TRAF3IP1/HDAC1/OSR1/CACNA1C/MED1/RDH10/TBX3	51
BP	GO:0045165	cell fate commitment	75|2417	217|14725	4.20343e-11	1.96896e-08	ENSG00000184058/ENSG00000128602/ENSG00000074047/ENSG00000143869/ENSG00000180447/ENSG00000162493/ENSG00000005073/ENSG00000184486/ENSG00000152192/ENSG00000114251/ENSG00000183072/ENSG00000128710/ENSG00000016082/ENSG00000007372/ENSG00000176165/ENSG00000170577/ENSG00000163623/ENSG00000138685/ENSG00000180818/ENSG00000205927/ENSG00000005513/ENSG00000184937/ENSG00000110693/ENSG00000185920/ENSG00000117707…	TBX1/SMO/GLI2/GDF7/GAS1/PDPN/HOXA11/POU3F2/POU4F1/WNT5A/NKX2-5/HOXD10/ISL1/PAX6/FOXG1/SIX2/NKX6-1/FGF2/HOXC10/OLIG2/SOX8/WT1/SOX6/PTCH1/PROX1/ZNF521/SOX5/LBX1/PAX7/MEF2C/EYA1/DMRTA2/SFRP1/PAX2/DLX2/SH3PXD2B/TAL1/BARHL2/PTCH2/NKX2-2/SATB2/PRRX1/CDON/NR2E1/NKX2-1/GAP43/HOXA2/SOSTDC1/EBF2/GBX1/RORA/ROR2/FOXN4/CYP26B1/CTR9/GCM1/OLIG1/DOCK7/SIX1/FOXC2/SPRY2/ISL2/POU6F2/CYLD/ATOH1/POU5F1/MYOD1/WNT10B/P…	75
BP	GO:0048568	embryonic organ development	117|2417	402|14725	8.05588e-11	3.48324e-08	ENSG00000152661/ENSG00000164683/ENSG00000162738/ENSG00000138829/ENSG00000184058/ENSG00000148516/ENSG00000128602/ENSG00000106004/ENSG00000074047/ENSG00000105997/ENSG00000005073/ENSG00000128918/ENSG00000125931/ENSG00000052850/ENSG00000136630/ENSG00000120068/ENSG00000114251/ENSG00000106006/ENSG00000183072/ENSG00000128710/ENSG00000103449/ENSG00000108511/ENSG00000165556/ENSG00000077092/ENSG00000137273…	GJA1/HEY1/VANGL2/FBN2/TBX1/ZEB1/SMO/HOXA5/GLI2/HOXA3/HOXA11/ALDH1A2/CITED1/ALX4/HLX/HOXB8/WNT5A/HOXA6/NKX2-5/HOXD10/SALL1/HOXB6/CDX2/RARB/FOXF2/LEF1/HOXA1/HOXB3/PAX6/TWIST1/FOXG1/SIX2/FOXF1/PCSK5/HOXB4/TCF7/DLX6/ZFPM2/EN1/ALX1/HOXD9/PTCH1/FOXC1/MYO3A/DLX5/PROX1/USH1C/HAND1/HAND2/LBX1/MEF2C/PITX2/EYA1/KIT/HOXB5/ITGA8/HOXC4/PAX2/FOXE1/SHOX2/DLX2/BBS7/COL2A1/SOBP/TAL1/TBX20/SATB2/PRRX1/MFAP2/HOXA7/N…	117
BP	GO:0001501	skeletal system development	128|2417	456|14725	1.46219e-10	5.87067e-08	ENSG00000102024/ENSG00000149948/ENSG00000170689/ENSG00000138829/ENSG00000184058/ENSG00000148516/ENSG00000253293/ENSG00000106004/ENSG00000074047/ENSG00000105997/ENSG00000005073/ENSG00000128714/ENSG00000038427/ENSG00000052850/ENSG00000019549/ENSG00000120068/ENSG00000114251/ENSG00000106006/ENSG00000128710/ENSG00000108511/ENSG00000072840/ENSG00000077092/ENSG00000105991/ENSG00000106031/ENSG00000120093…	PLS3/HMGA2/HOXB9/FBN2/TBX1/ZEB1/HOXA10/HOXA5/GLI2/HOXA3/HOXA11/HOXD13/VCAN/ALX4/SNAI2/HOXB8/WNT5A/HOXA6/HOXD10/HOXB6/EVC/RARB/HOXA1/HOXA13/HOXB3/TWIST1/SIX2/FGF2/MAF/PCSK5/DCHS1/HOXB4/COL13A1/HOXC10/DLX6/EN1/ALX1/HOXD9/SOX6/FOXC1/DLL3/DLX5/SOX5/HAND1/HAND2/COL5A2/-/PAX7/HAPLN3/MEF2C/PITX2/EYA1/KIT/HOXB5/SFRP1/HOXC4/PAX1/SHOX2/DLX2/SMAD9/MMP2/SH3PXD2B/LRRC17/COL2A1/TAL1/UNCX/SATB2/RFLNB/PRRX1/HOXA…	128
BP	GO:0001655	urogenital system development	92|2417	299|14725	3.75581e-10	1.40743e-07	ENSG00000085662/ENSG00000147257/ENSG00000162738/ENSG00000154734/ENSG00000116962/ENSG00000128602/ENSG00000074047/ENSG00000159184/ENSG00000005073/ENSG00000181690/ENSG00000128714/ENSG00000128918/ENSG00000125931/ENSG00000114251/ENSG00000103449/ENSG00000187498/ENSG00000077092/ENSG00000128713/ENSG00000112837/ENSG00000185008/ENSG00000170577/ENSG00000138685/ENSG00000103241/ENSG00000081181/ENSG00000099139…	AKR1B1/GPC3/VANGL2/ADAMTS1/NID1/SMO/GLI2/HOXB13/HOXA11/PLAG1/HOXD13/ALDH1A2/CITED1/WNT5A/SALL1/COL4A1/RARB/HOXD11/TBX18/ROBO2/SIX2/FGF2/FOXF1/ARG2/PCSK5/SLIT2/PGF/DCHS1/POU3F3/SOX8/PYGO1/WT1/KLF15/PTCH1/SERPINF1/FOXC1/FOXB1/PROX1/EPHA7/MME/MEF2C/EYA1/PLCE1/ITGA8/WNK4/SFRP1/PAX2/LGR5/SMAD9/KLHL3/EMX2/LRP4/ANGPT1/CA2/HEYL/BMP6/TP73/FAT4/GREB1L/RPGRIP1L/HAS2/AGTR1/C1GALT1/BMPER/LRRK2/CEP290/SIX1/FOX…	92
BP	GO:0072001	renal system development	83|2417	264|14725	8.61232e-10	3.02562e-07	ENSG00000085662/ENSG00000147257/ENSG00000162738/ENSG00000154734/ENSG00000116962/ENSG00000128602/ENSG00000074047/ENSG00000005073/ENSG00000128918/ENSG00000125931/ENSG00000114251/ENSG00000103449/ENSG00000187498/ENSG00000077092/ENSG00000128713/ENSG00000112837/ENSG00000185008/ENSG00000170577/ENSG00000138685/ENSG00000103241/ENSG00000081181/ENSG00000099139/ENSG00000145147/ENSG00000119630/ENSG00000166341…	AKR1B1/GPC3/VANGL2/ADAMTS1/NID1/SMO/GLI2/HOXA11/ALDH1A2/CITED1/WNT5A/SALL1/COL4A1/RARB/HOXD11/TBX18/ROBO2/SIX2/FGF2/FOXF1/ARG2/PCSK5/SLIT2/PGF/DCHS1/POU3F3/SOX8/PYGO1/WT1/KLF15/PTCH1/SERPINF1/FOXC1/PROX1/EPHA7/MME/MEF2C/EYA1/PLCE1/ITGA8/WNK4/SFRP1/PAX2/LGR5/SMAD9/KLHL3/EMX2/LRP4/ANGPT1/CA2/HEYL/BMP6/TP73/FAT4/GREB1L/RPGRIP1L/HAS2/AGTR1/C1GALT1/BMPER/LRRK2/CEP290/SIX1/FOXC2/PDGFRA/ODC1/CENPF/ZBTB1…	83
BP	GO:0007517	muscle organ development	100|2417	343|14725	1.74278e-09	5.76246e-07	ENSG00000152661/ENSG00000233276/ENSG00000162738/ENSG00000184058/ENSG00000128602/ENSG00000128573/ENSG00000112276/ENSG00000052850/ENSG00000136630/ENSG00000152192/ENSG00000022267/ENSG00000114251/ENSG00000183072/ENSG00000128710/ENSG00000069702/ENSG00000072840/ENSG00000016082/ENSG00000179456/ENSG00000138795/ENSG00000135903/ENSG00000122691/ENSG00000138685/ENSG00000169946/ENSG00000005513/ENSG00000184937…	GJA1/GPX1/VANGL2/TBX1/SMO/FOXP2/BVES/ALX4/HLX/POU4F1/FHL1/WNT5A/NKX2-5/HOXD10/TGFBR3/EVC/ISL1/ZBTB18/LEF1/PAX3/TWIST1/FGF2/ZFPM2/SOX8/WT1/HOXD9/SOX6/FOXC1/CAVIN4/VAX1/PROX1/HAND1/DMD/MYH3/LBX1/PAX7/MEF2C/MKX/HEG1/PITX2/DMRTA2/SHOX2/ETV1/EPHB1/VGLL2/MSC/TTN/S1PR1/TBX20/LAMA2/MYOM2/KLHL41/UTRN/MRAS/PAK1/TLL2/CDON/MYH15/COL19A1/MSX1/HEYL/TP73/MEIS1/HDAC9/CYP26B1/CAV3/CNTFR/ACTA1/SIX1/MEGF10/FOXC2/CE…	100
BP	GO:0048705	skeletal system morphogenesis	66|2417	196|14725	2.09816e-09	6.55208e-07	ENSG00000138829/ENSG00000184058/ENSG00000148516/ENSG00000106004/ENSG00000105997/ENSG00000005073/ENSG00000052850/ENSG00000120068/ENSG00000106006/ENSG00000128710/ENSG00000108511/ENSG00000077092/ENSG00000105991/ENSG00000120093/ENSG00000122691/ENSG00000170577/ENSG00000182742/ENSG00000197467/ENSG00000180318/ENSG00000128709/ENSG00000054598/ENSG00000105880/ENSG00000081189/ENSG00000104313/ENSG00000120075…	FBN2/TBX1/ZEB1/HOXA5/HOXA3/HOXA11/ALX4/HOXB8/HOXA6/HOXD10/HOXB6/RARB/HOXA1/HOXB3/TWIST1/SIX2/HOXB4/COL13A1/ALX1/HOXD9/FOXC1/DLX5/MEF2C/EYA1/HOXB5/SFRP1/PAX1/SHOX2/DLX2/MMP2/SH3PXD2B/COL2A1/UNCX/SATB2/RFLNB/PRRX1/HOXA7/NKX3-2/COMP/ALPL/HOXA2/MSX1/BMP6/HOXB2/RIPPLY2/ROR2/HAS2/CYP26B1/FLVCR1/NAB1/SIX1/FOXC2/PPARGC1B/PDGFRA/ACVR2B/COL27A1/HOXD8/NOG/WDR19/WNT10B/TBXT/HOXD3/RAB23/OSR1/FOXN3/RDH10	66
BP	GO:0048706	embryonic skeletal system development	46|2417	119|14725	4.48321e-09	1.32632e-06	ENSG00000170689/ENSG00000184058/ENSG00000148516/ENSG00000106004/ENSG00000105997/ENSG00000005073/ENSG00000052850/ENSG00000120068/ENSG00000114251/ENSG00000106006/ENSG00000128710/ENSG00000108511/ENSG00000105991/ENSG00000120093/ENSG00000122691/ENSG00000170577/ENSG00000099139/ENSG00000182742/ENSG00000180318/ENSG00000128709/ENSG00000009709/ENSG00000081189/ENSG00000104313/ENSG00000120075/ENSG00000168779…	HOXB9/TBX1/ZEB1/HOXA5/HOXA3/HOXA11/ALX4/HOXB8/WNT5A/HOXA6/HOXD10/HOXB6/HOXA1/HOXB3/TWIST1/SIX2/PCSK5/HOXB4/ALX1/HOXD9/PAX7/MEF2C/EYA1/HOXB5/SHOX2/DLX2/COL2A1/SATB2/PRRX1/HOXA7/NKX3-2/HOXA2/HOXB2/FLVCR1/SIX1/FOXC2/PDGFRA/SLC35D1/NOG/FGF9/WDR19/TBXT/HOXD3/SULF1/OSR1/RDH10	46
BP	GO:0090596	sensory organ morphogenesis	74|2417	234|14725	5.28978e-09	1.48669e-06	ENSG00000162738/ENSG00000138829/ENSG00000184058/ENSG00000148516/ENSG00000074047/ENSG00000177707/ENSG00000114251/ENSG00000103449/ENSG00000077092/ENSG00000137273/ENSG00000105991/ENSG00000007372/ENSG00000122691/ENSG00000176165/ENSG00000170577/ENSG00000006377/ENSG00000005513/ENSG00000095777/ENSG00000105880/ENSG00000117707/ENSG00000006611/ENSG00000204262/ENSG00000140807/ENSG00000164093/ENSG00000104313…	VANGL2/FBN2/TBX1/ZEB1/GLI2/NECTIN3/WNT5A/SALL1/RARB/FOXF2/HOXA1/PAX6/TWIST1/FOXG1/SIX2/DLX6/SOX8/MYO3A/DLX5/PROX1/USH1C/COL5A2/NKD1/PITX2/EYA1/ITGA8/PTPRM/PAX2/EPHB1/COL2A1/SOBP/PRRX1/MFAP2/CDON/NKX3-2/HOXA2/MSX1/ARL6/PITX3/MEIS1/ROR2/FOXN4/CYP26B1/SDK2/TSPAN12/CEP290/SIX1/SPRY2/CCDC66/RORB/HDAC2/ATOH1/TSHZ1/TSHR/CNTF/NTRK2/SIX3/NOG/FGF9/WDR19/AGTPBP1/HDAC1/TMIE/OSR1/FBN1/HMX2/HMX3/PDZD7/WNT3A/ME…	74
BP	GO:0007224	smoothened signaling pathway	47|2417	125|14725	8.68356e-09	2.29438e-06	ENSG00000147257/ENSG00000109113/ENSG00000128602/ENSG00000074047/ENSG00000180447/ENSG00000134874/ENSG00000072840/ENSG00000143147/ENSG00000007372/ENSG00000163623/ENSG00000103241/ENSG00000185920/ENSG00000164066/ENSG00000146350/ENSG00000104332/ENSG00000187240/ENSG00000168779/ENSG00000138686/ENSG00000135919/ENSG00000117425/ENSG00000125820/ENSG00000116132/ENSG00000064309/ENSG00000113966/ENSG00000128881…	GPC3/RAB34/SMO/GLI2/GAS1/DZIP1/EVC/GPR161/PAX6/NKX6-1/FOXF1/PTCH1/INTU/TBC1D32/SFRP1/DYNC2H1/SHOX2/BBS7/SERPINE2/PTCH2/NKX2-2/PRRX1/CDON/ARL6/TTBK2/RPGRIP1L/RORA/ROR2/OTX2/SCUBE1/KCTD6/SCUBE3/ANKMY2/KIF3A/HSPB11/FGF9/GLI1/WDR19/BOC/TRAF3IP1/WNT10B/TCTN2/KIF7/PRKACB/KIAA0586/DISP2/DISP1	47
BP	GO:0055123	digestive system development	48|2417	129|14725	8.97995e-09	2.29438e-06	ENSG00000162738/ENSG00000116729/ENSG00000128602/ENSG00000106004/ENSG00000074047/ENSG00000131668/ENSG00000128714/ENSG00000128918/ENSG00000052850/ENSG00000136630/ENSG00000114251/ENSG00000103449/ENSG00000165556/ENSG00000077092/ENSG00000137273/ENSG00000170577/ENSG00000103241/ENSG00000099139/ENSG00000166341/ENSG00000081059/ENSG00000165617/ENSG00000164093/ENSG00000157404/ENSG00000139515/ENSG00000104332…	VANGL2/WLS/SMO/HOXA5/GLI2/BARX1/HOXD13/ALDH1A2/ALX4/HLX/WNT5A/SALL1/CDX2/RARB/FOXF2/SIX2/FOXF1/PCSK5/DCHS1/TCF7/DACT1/PITX2/KIT/PDX1/SFRP1/FOXE1/SHOX2/EDNRB/BBS7/NKX2-2/NKX3-2/PKDCC/FAT4/C1GALT1/ZIC3/PDGFRA/FOXL1/ITGA6/PDGFC/CLDN18/ACVR2B/FGF9/GLI1/WDR19/EGFR/SAV1/RBPMS2/CCDC39	48
BP	GO:0048565	digestive tract development	45|2417	118|14725	1.077e-08	2.59639e-06	ENSG00000162738/ENSG00000128602/ENSG00000106004/ENSG00000074047/ENSG00000128714/ENSG00000128918/ENSG00000052850/ENSG00000136630/ENSG00000114251/ENSG00000103449/ENSG00000165556/ENSG00000077092/ENSG00000137273/ENSG00000170577/ENSG00000103241/ENSG00000099139/ENSG00000166341/ENSG00000081059/ENSG00000165617/ENSG00000164093/ENSG00000157404/ENSG00000139515/ENSG00000104332/ENSG00000178919/ENSG00000168779…	VANGL2/SMO/HOXA5/GLI2/HOXD13/ALDH1A2/ALX4/HLX/WNT5A/SALL1/CDX2/RARB/FOXF2/SIX2/FOXF1/PCSK5/DCHS1/TCF7/DACT1/PITX2/KIT/PDX1/SFRP1/FOXE1/SHOX2/EDNRB/BBS7/NKX2-2/NKX3-2/PKDCC/FAT4/C1GALT1/ZIC3/PDGFRA/FOXL1/ITGA6/PDGFC/CLDN18/ACVR2B/FGF9/GLI1/EGFR/SAV1/RBPMS2/CCDC39	45
BP	GO:0030900	forebrain development	98|2417	345|14725	1.10858e-08	2.59639e-06	ENSG00000159217/ENSG00000165300/ENSG00000170558/ENSG00000128602/ENSG00000074047/ENSG00000128573/ENSG00000143869/ENSG00000277586/ENSG00000184486/ENSG00000091136/ENSG00000128918/ENSG00000152192/ENSG00000114251/ENSG00000103449/ENSG00000010810/ENSG00000016082/ENSG00000077092/ENSG00000183873/ENSG00000087258/ENSG00000138795/ENSG00000185008/ENSG00000169554/ENSG00000007372/ENSG00000176165/ENSG00000183023…	IGF2BP1/SLITRK5/CDH2/SMO/GLI2/FOXP2/GDF7/NEFL/POU3F2/LAMB1/ALDH1A2/POU4F1/WNT5A/SALL1/FYN/ISL1/RARB/SCN5A/GNAO1/LEF1/ROBO2/ZEB2/PAX6/FOXG1/SLC8A1/SLIT2/POU3F3/OLIG2/LPAR1/TMEM108/PCDH9/DLX5/FOXB1/PROX1/EPHA5/DMD/SEMA3A/PITX2/DMRTA2/DYNC2H1/KCNC1/DLX2/ETS1/NRGN/MYH10/EMX2/APAF1/LHX8/UNCX/SATB2/PRKG1/CDON/NR2E1/NKX2-1/MSX1/SSTR2/FAT4/RPGRIP1L/EMX1/OTX2/DCLK2/SLC8A3/FUT10/LRRK2/CRTAC1/DOCK7/PGAP1/GA…	98
BP	GO:0001822	kidney development	76|2417	247|14725	1.259e-08	2.83073e-06	ENSG00000085662/ENSG00000147257/ENSG00000162738/ENSG00000154734/ENSG00000116962/ENSG00000128602/ENSG00000074047/ENSG00000005073/ENSG00000128918/ENSG00000125931/ENSG00000103449/ENSG00000077092/ENSG00000128713/ENSG00000185008/ENSG00000170577/ENSG00000138685/ENSG00000081181/ENSG00000099139/ENSG00000145147/ENSG00000119630/ENSG00000166341/ENSG00000198914/ENSG00000005513/ENSG00000171016/ENSG00000184937…	AKR1B1/GPC3/VANGL2/ADAMTS1/NID1/SMO/GLI2/HOXA11/ALDH1A2/CITED1/SALL1/RARB/HOXD11/ROBO2/SIX2/FGF2/ARG2/PCSK5/SLIT2/PGF/DCHS1/POU3F3/SOX8/PYGO1/WT1/KLF15/PTCH1/SERPINF1/FOXC1/PROX1/EPHA7/MME/MEF2C/EYA1/PLCE1/ITGA8/WNK4/SFRP1/PAX2/SMAD9/KLHL3/LRP4/ANGPT1/CA2/HEYL/BMP6/TP73/FAT4/GREB1L/RPGRIP1L/HAS2/AGTR1/C1GALT1/BMPER/LRRK2/CEP290/SIX1/FOXC2/PDGFRA/ODC1/CENPF/ZBTB16/PTPRO/KIF3A/SIM1/CD34/ACVR2B/NOG/…	76
BP	GO:0048704	embryonic skeletal system morphogenesis	37|2417	89|14725	1.46792e-08	3.06149e-06	ENSG00000184058/ENSG00000148516/ENSG00000106004/ENSG00000105997/ENSG00000005073/ENSG00000052850/ENSG00000120068/ENSG00000106006/ENSG00000128710/ENSG00000108511/ENSG00000105991/ENSG00000120093/ENSG00000122691/ENSG00000170577/ENSG00000182742/ENSG00000180318/ENSG00000128709/ENSG00000081189/ENSG00000104313/ENSG00000120075/ENSG00000168779/ENSG00000115844/ENSG00000139219/ENSG00000119042/ENSG00000116132…	TBX1/ZEB1/HOXA5/HOXA3/HOXA11/ALX4/HOXB8/HOXA6/HOXD10/HOXB6/HOXA1/HOXB3/TWIST1/SIX2/HOXB4/ALX1/HOXD9/MEF2C/EYA1/HOXB5/SHOX2/DLX2/COL2A1/SATB2/PRRX1/HOXA7/HOXA2/HOXB2/FLVCR1/SIX1/FOXC2/PDGFRA/NOG/WDR19/HOXD3/OSR1/RDH10	37
BP	GO:0014706	striated muscle tissue development	95|2417	333|14725	1.47056e-08	3.06149e-06	ENSG00000152661/ENSG00000233276/ENSG00000184058/ENSG00000128602/ENSG00000128573/ENSG00000182963/ENSG00000128918/ENSG00000112276/ENSG00000136630/ENSG00000152192/ENSG00000114251/ENSG00000183072/ENSG00000128710/ENSG00000069702/ENSG00000016082/ENSG00000077092/ENSG00000179456/ENSG00000138795/ENSG00000162614/ENSG00000122691/ENSG00000138685/ENSG00000183023/ENSG00000169946/ENSG00000005513/ENSG00000184937…	GJA1/GPX1/TBX1/SMO/FOXP2/GJC1/ALDH1A2/BVES/HLX/POU4F1/WNT5A/NKX2-5/HOXD10/TGFBR3/ISL1/RARB/ZBTB18/LEF1/NEXN/TWIST1/FGF2/SLC8A1/ZFPM2/SOX8/WT1/ACTN2/HOXD9/SOX6/FOXC1/VAX1/PROX1/HAND1/DMD/PAX7/MEF2C/CXADR/HEG1/PITX2/EYA1/DMRTA2/SHOX2/EPHB1/VGLL2/MSC/MYH10/TTN/S1PR1/TBX20/MYOM2/SORBS2/KLHL41/PAK1/TLL2/CDON/MYH15/COL19A1/HEYL/ACADM/TP73/MEIS1/HDAC9/CYP26B1/CAV3/ACTA1/SIX1/MEGF10/FOXC2/DSG2/PDGFRA/CEN…	95
BP	GO:0060537	muscle tissue development	98|2417	348|14725	1.78975e-08	3.59293e-06	ENSG00000152661/ENSG00000233276/ENSG00000184058/ENSG00000128602/ENSG00000128573/ENSG00000182963/ENSG00000128918/ENSG00000112276/ENSG00000136630/ENSG00000152192/ENSG00000114251/ENSG00000183072/ENSG00000128710/ENSG00000069702/ENSG00000016082/ENSG00000077092/ENSG00000179456/ENSG00000138795/ENSG00000162614/ENSG00000122691/ENSG00000138685/ENSG00000183023/ENSG00000169946/ENSG00000005513/ENSG00000184937…	GJA1/GPX1/TBX1/SMO/FOXP2/GJC1/ALDH1A2/BVES/HLX/POU4F1/WNT5A/NKX2-5/HOXD10/TGFBR3/ISL1/RARB/ZBTB18/LEF1/NEXN/TWIST1/FGF2/SLC8A1/ZFPM2/SOX8/WT1/ACTN2/HOXD9/SOX6/FOXC1/VAX1/PROX1/HAND1/DMD/PAX7/MEF2C/CXADR/HEG1/PITX2/EYA1/DMRTA2/ITGA8/SHOX2/EPHB1/VGLL2/MSC/MYH10/TTN/S1PR1/TBX20/MYOM2/SORBS2/KLHL41/PAK1/TLL2/CDON/MYH15/COL19A1/HEYL/ACADM/TP73/MEIS1/HDAC9/CYP26B1/CAV3/ACTA1/SIX1/MEGF10/FOXC2/DSG2/PDGF…	98
BP	GO:0007507	heart development	127|2417	487|14725	2.41647e-08	4.68378e-06	ENSG00000152661/ENSG00000147257/ENSG00000164683/ENSG00000162738/ENSG00000154734/ENSG00000184058/ENSG00000203867/ENSG00000145362/ENSG00000128602/ENSG00000074047/ENSG00000182963/ENSG00000128918/ENSG00000112276/ENSG00000019549/ENSG00000152192/ENSG00000114251/ENSG00000183072/ENSG00000103449/ENSG00000069702/ENSG00000016082/ENSG00000077092/ENSG00000183873/ENSG00000162614/ENSG00000122691/ENSG00000122870…	GJA1/GPC3/HEY1/VANGL2/ADAMTS1/TBX1/RBM20/ANK2/SMO/GLI2/GJC1/ALDH1A2/BVES/SNAI2/POU4F1/WNT5A/NKX2-5/SALL1/TGFBR3/ISL1/RARB/SCN5A/NEXN/TWIST1/BICC1/FGF2/SLC8A1/FOXF1/PCSK5/DCHS1/ZFPM2/WT1/ACTN2/SOX6/PTCH1/FOXC1/PROX1/HAND1/HAND2/ARMC4/LBX1/MEF2C/CXADR/HEG1/PITX2/EYA1/PLCE1/TBC1D32/DYNC2H1/PDLIM3/SHOX2/NRP2/SH3PXD2B/MYH10/BBS7/COL2A1/RAMP2/LOX/TTN/TMEM100/S1PR1/TBX20/SORBS2/PAK1/ATM/CALCRL/MSX1/HEYL…	127
BP	GO:0043583	ear development	61|2417	195|14725	1.76335e-07	3.30393e-05	ENSG00000162738/ENSG00000184058/ENSG00000148516/ENSG00000074047/ENSG00000114251/ENSG00000055732/ENSG00000103449/ENSG00000105991/ENSG00000153291/ENSG00000185483/ENSG00000122691/ENSG00000176165/ENSG00000170577/ENSG00000178573/ENSG00000166341/ENSG00000006377/ENSG00000105928/ENSG00000119715/ENSG00000112319/ENSG00000107736/ENSG00000095777/ENSG00000105880/ENSG00000117707/ENSG00000006611/ENSG00000099954…	VANGL2/TBX1/ZEB1/GLI2/WNT5A/MCOLN3/SALL1/HOXA1/SLC25A27/ROR1/TWIST1/FOXG1/SIX2/MAF/DCHS1/DLX6/GSDME/ESRRB/EYA4/CDH23/MYO3A/DLX5/PROX1/USH1C/CECR2/EYA1/ITGA8/PAX2/LGR5/COL2A1/SOBP/PRRX1/NKX3-2/HOXA2/MSX1/FAT4/PLPPR4/RPGRIP1L/ROR2/BMPER/CEP290/SIX1/SPARC/SPRY2/ATOH1/TSHZ1/TSHR/KIF3A/NOG/FGF9/WDR19/PDGFRB/TMIE/OSR1/HMX2/HMX3/PDZD7/WNT3A/RDH10/FZD3/KCNQ1	61
BP	GO:0048663	neuron fate commitment	27|2417	60|14725	1.84951e-07	3.35358e-05	ENSG00000074047/ENSG00000184486/ENSG00000152192/ENSG00000128710/ENSG00000016082/ENSG00000007372/ENSG00000176165/ENSG00000163623/ENSG00000180818/ENSG00000205927/ENSG00000198795/ENSG00000138136/ENSG00000009709/ENSG00000104313/ENSG00000142700/ENSG00000115844/ENSG00000125820/ENSG00000119042/ENSG00000116132/ENSG00000136352/ENSG00000164900/ENSG00000139445/ENSG00000184221/ENSG00000126778/ENSG00000159556…	GLI2/POU3F2/POU4F1/HOXD10/ISL1/PAX6/FOXG1/NKX6-1/HOXC10/OLIG2/ZNF521/LBX1/PAX7/EYA1/DMRTA2/DLX2/NKX2-2/SATB2/PRRX1/NKX2-1/GBX1/FOXN4/OLIG1/SIX1/ISL2/ATOH1/DMRT3	27
BP	GO:0021537	telencephalon development	69|2417	231|14725	2.0795e-07	3.65278e-05	ENSG00000159217/ENSG00000165300/ENSG00000170558/ENSG00000128602/ENSG00000128573/ENSG00000277586/ENSG00000184486/ENSG00000091136/ENSG00000114251/ENSG00000103449/ENSG00000077092/ENSG00000183873/ENSG00000138795/ENSG00000185008/ENSG00000169554/ENSG00000007372/ENSG00000176165/ENSG00000183023/ENSG00000145147/ENSG00000198914/ENSG00000198121/ENSG00000144868/ENSG00000105880/ENSG00000171956/ENSG00000117707…	IGF2BP1/SLITRK5/CDH2/SMO/FOXP2/NEFL/POU3F2/LAMB1/WNT5A/SALL1/RARB/SCN5A/LEF1/ROBO2/ZEB2/PAX6/FOXG1/SLC8A1/SLIT2/POU3F3/LPAR1/TMEM108/DLX5/FOXB1/PROX1/EPHA5/DMD/SEMA3A/DMRTA2/DLX2/NRGN/MYH10/EMX2/UNCX/CDON/NR2E1/NKX2-1/FAT4/RPGRIP1L/EMX1/DCLK2/SLC8A3/FUT10/LRRK2/CRTAC1/GART/AQP1/NPY/ATOH1/AVPR1A/KIF3A/HPRT1/NTRK2/ASPM/DIXDC1/SIX3/AFDN/EGFR/AGTPBP1/ATP2B4/MFSD2A/GNG12/ID4/WNT3A/HTR6/FEZ1/EFHC1/MCPH…	69
BP	GO:0042471	ear morphogenesis	41|2417	113|14725	2.37312e-07	3.88929e-05	ENSG00000162738/ENSG00000184058/ENSG00000148516/ENSG00000074047/ENSG00000114251/ENSG00000103449/ENSG00000105991/ENSG00000122691/ENSG00000176165/ENSG00000170577/ENSG00000006377/ENSG00000095777/ENSG00000105880/ENSG00000117707/ENSG00000006611/ENSG00000104313/ENSG00000077943/ENSG00000075891/ENSG00000139219/ENSG00000112320/ENSG00000116132/ENSG00000109705/ENSG00000105996/ENSG00000163132/ENSG00000169071…	VANGL2/TBX1/ZEB1/GLI2/WNT5A/SALL1/HOXA1/TWIST1/FOXG1/SIX2/DLX6/MYO3A/DLX5/PROX1/USH1C/EYA1/ITGA8/PAX2/COL2A1/SOBP/PRRX1/NKX3-2/HOXA2/MSX1/ROR2/CEP290/SIX1/SPRY2/ATOH1/TSHZ1/TSHR/NOG/FGF9/WDR19/TMIE/OSR1/HMX2/HMX3/PDZD7/WNT3A/FZD3	41
BP	GO:0021953	central nervous system neuron differentiation	52|2417	158|14725	2.38874e-07	3.88929e-05	ENSG00000128602/ENSG00000074047/ENSG00000143869/ENSG00000152192/ENSG00000114251/ENSG00000128710/ENSG00000103449/ENSG00000016082/ENSG00000138795/ENSG00000185008/ENSG00000169554/ENSG00000007372/ENSG00000176165/ENSG00000163623/ENSG00000126970/ENSG00000145147/ENSG00000180818/ENSG00000205927/ENSG00000185920/ENSG00000105880/ENSG00000117707/ENSG00000138136/ENSG00000009709/ENSG00000075213/ENSG00000104332…	SMO/GLI2/GDF7/POU4F1/WNT5A/HOXD10/SALL1/ISL1/LEF1/ROBO2/ZEB2/PAX6/FOXG1/NKX6-1/ZC4H2/SLIT2/HOXC10/OLIG2/PTCH1/DLX5/PROX1/LBX1/PAX7/SEMA3A/SFRP1/DYNC2H1/EPHB1/DLX2/TAL1/LHX8/TBX20/UNCX/NKX2-2/SATB2/NR2E1/NKX2-1/GBX1/EMX1/RORA/FOXN4/MDGA1/DCLK2/GRID2/ISL2/CBLN1/NPY/HPRT1/NTRK2/AGTPBP1/DMRT3/ID4/WNT3A	52
BP	GO:0030198	extracellular matrix organization	84|2417	300|14725	2.42173e-07	3.88929e-05	ENSG00000166086/ENSG00000134871/ENSG00000107957/ENSG00000138829/ENSG00000087303/ENSG00000116962/ENSG00000050555/ENSG00000156140/ENSG00000162493/ENSG00000213949/ENSG00000197565/ENSG00000091136/ENSG00000038427/ENSG00000140092/ENSG00000162909/ENSG00000187955/ENSG00000101680/ENSG00000187498/ENSG00000137273/ENSG00000115232/ENSG00000077942/ENSG00000162733/ENSG00000138685/ENSG00000103241/ENSG00000112769…	JAM3/COL4A2/SH3PXD2A/FBN2/NID2/NID1/LAMC3/ADAMTS3/PDPN/ITGA1/COL4A6/LAMB1/VCAN/FBLN5/CAPN2/COL14A1/LAMA1/COL4A1/FOXF2/ITGA4/FBLN1/DDR2/FGF2/FOXF1/LAMA4/COL13A1/WT1/FOXC1/COL4A5/ERO1B/CCDC80/ADAMTS20/NDNF/ADAMTS2/COL5A2/GPM6B/ITGA8/MMP2/SH3PXD2B/EGFLAM/ETS1/COL2A1/RAMP2/LOX/ITGA9/SPINK5/LAMA2/RECK/MFAP2/TLL2/NR2E1/COL19A1/COMP/THBS4/ANTXR1/HSD17B12/HAS2/JAM2/COL6A1/SCUBE1/FBLN2/OLFML2B/SPARC/FOXC2…	84
BP	GO:0001708	cell fate specification	29|2417	70|14725	5.7114e-07	8.91772e-05	ENSG00000184058/ENSG00000128602/ENSG00000074047/ENSG00000005073/ENSG00000184486/ENSG00000152192/ENSG00000128710/ENSG00000016082/ENSG00000007372/ENSG00000170577/ENSG00000163623/ENSG00000138685/ENSG00000180818/ENSG00000205927/ENSG00000110693/ENSG00000185920/ENSG00000138136/ENSG00000104313/ENSG00000142700/ENSG00000075891/ENSG00000117425/ENSG00000125820/ENSG00000064309/ENSG00000126778/ENSG00000159556…	TBX1/SMO/GLI2/HOXA11/POU3F2/POU4F1/HOXD10/ISL1/PAX6/SIX2/NKX6-1/FGF2/HOXC10/OLIG2/SOX6/PTCH1/LBX1/EYA1/DMRTA2/PAX2/PTCH2/NKX2-2/CDON/SIX1/ISL2/ATOH1/POU5F1/DMRT3/WNT3A	29
BP	GO:0009953	dorsal/ventral pattern formation	34|2417	89|14725	6.2436e-07	9.48521e-05	ENSG00000128602/ENSG00000074047/ENSG00000005073/ENSG00000128713/ENSG00000143147/ENSG00000007372/ENSG00000176165/ENSG00000163623/ENSG00000163064/ENSG00000185920/ENSG00000164066/ENSG00000009709/ENSG00000146350/ENSG00000164651/ENSG00000104332/ENSG00000187240/ENSG00000164532/ENSG00000134569/ENSG00000125820/ENSG00000136352/ENSG00000105996/ENSG00000171243/ENSG00000173917/ENSG00000139445/ENSG00000131437…	SMO/GLI2/HOXA11/HOXD11/GPR161/PAX6/FOXG1/NKX6-1/EN1/PTCH1/INTU/PAX7/TBC1D32/SP8/SFRP1/DYNC2H1/TBX20/LRP4/NKX2-2/NKX2-1/HOXA2/SOSTDC1/HOXB2/FOXN4/KIF3A/SIX3/NOG/GLI1/WDR19/TRAF3IP1/DMRT3/PRKACB/WNT3A/DISP1	34
BP	GO:0021515	cell differentiation in spinal cord	22|2417	46|14725	6.90122e-07	9.60697e-05	ENSG00000074047/ENSG00000143869/ENSG00000128710/ENSG00000016082/ENSG00000007372/ENSG00000163623/ENSG00000126970/ENSG00000180818/ENSG00000205927/ENSG00000185920/ENSG00000138136/ENSG00000009709/ENSG00000187240/ENSG00000162367/ENSG00000164532/ENSG00000125820/ENSG00000164900/ENSG00000139445/ENSG00000112139/ENSG00000159556/ENSG00000064218/ENSG00000154342	GLI2/GDF7/HOXD10/ISL1/PAX6/NKX6-1/ZC4H2/HOXC10/OLIG2/PTCH1/LBX1/PAX7/DYNC2H1/TAL1/TBX20/NKX2-2/GBX1/FOXN4/MDGA1/ISL2/DMRT3/WNT3A	22
BP	GO:0009855	determination of bilateral symmetry	41|2417	117|14725	6.92702e-07	9.60697e-05	ENSG00000152661/ENSG00000162738/ENSG00000184058/ENSG00000128602/ENSG00000146122/ENSG00000128918/ENSG00000114251/ENSG00000183072/ENSG00000122870/ENSG00000103241/ENSG00000099139/ENSG00000113196/ENSG00000164107/ENSG00000169126/ENSG00000138136/ENSG00000081189/ENSG00000164093/ENSG00000146350/ENSG00000187240/ENSG00000138686/ENSG00000164532/ENSG00000109705/ENSG00000171243/ENSG00000113966/ENSG00000103494…	GJA1/VANGL2/TBX1/SMO/DAAM2/ALDH1A2/WNT5A/NKX2-5/BICC1/FOXF1/PCSK5/HAND1/HAND2/ARMC4/LBX1/MEF2C/PITX2/TBC1D32/DYNC2H1/BBS7/TBX20/NKX3-2/SOSTDC1/ARL6/RPGRIP1L/RIPPLY2/FOXN4/ZIC3/KIF3A/DYNC2LI1/RTTN/ACVR2B/DNAH11/TBXT/PKD1L1/WNT3A/CCDC151/MIB1/CCDC39/DISP1/TBX3	41
BP	GO:0001525	angiogenesis	113|2417	446|14725	6.96557e-07	9.60697e-05	ENSG00000149948/ENSG00000233276/ENSG00000166086/ENSG00000134871/ENSG00000164683/ENSG00000184058/ENSG00000126016/ENSG00000106004/ENSG00000196628/ENSG00000159184/ENSG00000105997/ENSG00000128805/ENSG00000076706/ENSG00000114251/ENSG00000037280/ENSG00000187498/ENSG00000016082/ENSG00000102755/ENSG00000138795/ENSG00000116678/ENSG00000027869/ENSG00000120093/ENSG00000122691/ENSG00000138685/ENSG00000166501…	HMGA2/GPX1/JAM3/COL4A2/HEY1/TBX1/AMOT/HOXA5/TCF4/HOXB13/HOXA3/ARHGAP22/MCAM/WNT5A/FLT4/COL4A1/ISL1/FLT1/LEF1/LEPR/SH2D2A/HOXB3/TWIST1/FGF2/PRKCB/ADGRB3/SLIT2/PGF/SERPINF1/FOXC1/NDNF/HAND1/PPP1R16B/HAND2/PITX2/PTPRM/SFRP1/CD40/EPHB1/NRP2/MMP2/ETS1/RAMP2/TAL1/TMEM100/JCAD/SPINK5/S1PR1/TBX20/AKT3/HOXA7/NR2E1/ANGPT1/THBS4/CALCRL/PRKD1/MIR221/ADGRA2/TNMD/APLN/MEIS1/RORA/HDAC9/PTGIS/AGTR1/TNFSF12/C1GAL…	113
BP	GO:0007368	determination of left/right symmetry	39|2417	109|14725	7.0074e-07	9.60697e-05	ENSG00000152661/ENSG00000162738/ENSG00000184058/ENSG00000128602/ENSG00000146122/ENSG00000114251/ENSG00000183072/ENSG00000122870/ENSG00000103241/ENSG00000099139/ENSG00000113196/ENSG00000164107/ENSG00000169126/ENSG00000138136/ENSG00000081189/ENSG00000164093/ENSG00000146350/ENSG00000187240/ENSG00000138686/ENSG00000164532/ENSG00000109705/ENSG00000113966/ENSG00000103494/ENSG00000203877/ENSG00000139445…	GJA1/VANGL2/TBX1/SMO/DAAM2/WNT5A/NKX2-5/BICC1/FOXF1/PCSK5/HAND1/HAND2/ARMC4/LBX1/MEF2C/PITX2/TBC1D32/DYNC2H1/BBS7/TBX20/NKX3-2/ARL6/RPGRIP1L/RIPPLY2/FOXN4/ZIC3/KIF3A/DYNC2LI1/RTTN/ACVR2B/DNAH11/TBXT/PKD1L1/WNT3A/CCDC151/MIB1/CCDC39/DISP1/TBX3	39
BP	GO:0001654	eye development	85|2417	312|14725	7.31185e-07	9.78569e-05	ENSG00000152661/ENSG00000198732/ENSG00000138829/ENSG00000050555/ENSG00000148516/ENSG00000128573/ENSG00000177707/ENSG00000128918/ENSG00000114251/ENSG00000187498/ENSG00000077092/ENSG00000137273/ENSG00000169554/ENSG00000007372/ENSG00000166402/ENSG00000122691/ENSG00000178573/ENSG00000005513/ENSG00000184937/ENSG00000132386/ENSG00000054598/ENSG00000148704/ENSG00000117707/ENSG00000204262/ENSG00000140807…	GJA1/SMOC1/FBN2/LAMC3/ZEB1/FOXP2/NECTIN3/ALDH1A2/WNT5A/COL4A1/RARB/FOXF2/ZEB2/PAX6/TUB/TWIST1/MAF/SOX8/WT1/SERPINF1/FOXC1/VAX1/PROX1/COL5A2/NKD1/PITX2/TBC1D32/PTPRM/NPHP1/PAX2/EPHB1/DLX2/SH3PXD2B/MERTK/CHRDL1/MYH10/BBS7/MAB21L1/MYOM2/GPM6A/MFAP2/CDON/MYH15/NR2E1/BMP6/ARL6/RPGRIP1L/PITX3/MEIS1/FOXN4/SDK2/TSPAN12/CEP290/FOXC2/CCDC66/PDGFRA/RORB/HDAC2/CNTF/NTRK2/ACVR2B/SIX3/FGF9/WDR19/EGFR/AGTPBP1/T…	85
BP	GO:0043062	extracellular structure organization	91|2417	341|14725	8.04251e-07	0.000105132	ENSG00000166086/ENSG00000134871/ENSG00000107957/ENSG00000138829/ENSG00000087303/ENSG00000116962/ENSG00000050555/ENSG00000156140/ENSG00000162493/ENSG00000213949/ENSG00000197565/ENSG00000091136/ENSG00000038427/ENSG00000140092/ENSG00000162909/ENSG00000187955/ENSG00000101680/ENSG00000187498/ENSG00000100979/ENSG00000137273/ENSG00000115232/ENSG00000077942/ENSG00000162733/ENSG00000130208/ENSG00000138685…	JAM3/COL4A2/SH3PXD2A/FBN2/NID2/NID1/LAMC3/ADAMTS3/PDPN/ITGA1/COL4A6/LAMB1/VCAN/FBLN5/CAPN2/COL14A1/LAMA1/COL4A1/PLTP/FOXF2/ITGA4/FBLN1/DDR2/APOC1/FGF2/FOXF1/LAMA4/COL13A1/WT1/FOXC1/COL4A5/ERO1B/CCDC80/ADAMTS20/NDNF/ADAMTS2/COL5A2/GPM6B/ITGA8/MMP2/SH3PXD2B/EGFLAM/ETS1/LPL/COL2A1/RAMP2/LOX/ITGA9/SPINK5/LAMA2/RECK/MFAP2/TLL2/NR2E1/COL19A1/COMP/THBS4/PLA2G7/ANTXR1/HSD17B12/HAS2/AGTR1/JAM2/COL6A1/SCUB…	91
BP	GO:0021510	spinal cord development	34|2417	90|14725	8.46556e-07	0.000108148	ENSG00000128602/ENSG00000074047/ENSG00000143869/ENSG00000277586/ENSG00000146122/ENSG00000120068/ENSG00000128710/ENSG00000016082/ENSG00000185008/ENSG00000007372/ENSG00000163623/ENSG00000126970/ENSG00000180818/ENSG00000205927/ENSG00000185920/ENSG00000171956/ENSG00000164066/ENSG00000117707/ENSG00000138136/ENSG00000009709/ENSG00000187240/ENSG00000162367/ENSG00000164532/ENSG00000164853/ENSG00000125820…	SMO/GLI2/GDF7/NEFL/DAAM2/HOXB8/HOXD10/ISL1/ROBO2/PAX6/NKX6-1/ZC4H2/HOXC10/OLIG2/PTCH1/FOXB1/INTU/PROX1/LBX1/PAX7/DYNC2H1/TAL1/TBX20/UNCX/NKX2-2/GBX1/FOXN4/MDGA1/ISL2/PTBP2/NOG/DMRT3/WNT3A/PLXDC1	34
BP	GO:0009799	specification of symmetry	41|2417	118|14725	8.94997e-07	0.000111795	ENSG00000152661/ENSG00000162738/ENSG00000184058/ENSG00000128602/ENSG00000146122/ENSG00000128918/ENSG00000114251/ENSG00000183072/ENSG00000122870/ENSG00000103241/ENSG00000099139/ENSG00000113196/ENSG00000164107/ENSG00000169126/ENSG00000138136/ENSG00000081189/ENSG00000164093/ENSG00000146350/ENSG00000187240/ENSG00000138686/ENSG00000164532/ENSG00000109705/ENSG00000171243/ENSG00000113966/ENSG00000103494…	GJA1/VANGL2/TBX1/SMO/DAAM2/ALDH1A2/WNT5A/NKX2-5/BICC1/FOXF1/PCSK5/HAND1/HAND2/ARMC4/LBX1/MEF2C/PITX2/TBC1D32/DYNC2H1/BBS7/TBX20/NKX3-2/SOSTDC1/ARL6/RPGRIP1L/RIPPLY2/FOXN4/ZIC3/KIF3A/DYNC2LI1/RTTN/ACVR2B/DNAH11/TBXT/PKD1L1/WNT3A/CCDC151/MIB1/CCDC39/DISP1/TBX3	41
BP	GO:0061564	axon development	114|2417	454|14725	1.0039e-06	0.000121737	ENSG00000165300/ENSG00000154277/ENSG00000166086/ENSG00000149294/ENSG00000162738/ENSG00000104722/ENSG00000074047/ENSG00000143869/ENSG00000155980/ENSG00000166313/ENSG00000277586/ENSG00000184486/ENSG00000183853/ENSG00000152192/ENSG00000114251/ENSG00000010810/ENSG00000016082/ENSG00000072832/ENSG00000185008/ENSG00000169554/ENSG00000131711/ENSG00000188517/ENSG00000171517/ENSG00000007372/ENSG00000176165…	SLITRK5/UCHL1/JAM3/NCAM1/VANGL2/NEFM/GLI2/GDF7/KIF5A/APBB1/NEFL/POU3F2/KIRREL1/POU4F1/WNT5A/FYN/ISL1/CRMP1/ROBO2/ZEB2/MAP1B/COL25A1/LPAR3/PAX6/FOXG1/NKX6-1/SLITRK3/SLIT2/ROBO3/AUTS2/PRKCQ/PTCH1/EPHA8/DLX5/FOXB1/SLC9A6/VAX1/EPHA5/EPHA7/TSPAN2/TUBB2B/SEMA3A/BRSK1/SPART/PTPRM/PAX2/SHOX2/ETV1/EPHB1/NRP2/MYH10/BARHL2/RNF165/LAMA2/SEMA3G/LRP4/LHX9/PAK1/NR2E1/NKX2-1/GAP43/NLGN3/HOXA2/USP33/NPTX1/ATL1/MI…	114
BP	GO:0009954	proximal/distal pattern formation	15|2417	25|14725	1.01791e-06	0.000121737	ENSG00000253293/ENSG00000074047/ENSG00000005073/ENSG00000128918/ENSG00000128710/ENSG00000180818/ENSG00000163064/ENSG00000128709/ENSG00000164651/ENSG00000115844/ENSG00000134569/ENSG00000003137/ENSG00000138083/ENSG00000111087/ENSG00000143867	HOXA10/GLI2/HOXA11/ALDH1A2/HOXD10/HOXC10/EN1/HOXD9/SP8/DLX2/LRP4/CYP26B1/SIX3/GLI1/OSR1	15
BP	GO:0048665	neuron fate specification	16|2417	28|14725	1.10288e-06	0.000129152	ENSG00000074047/ENSG00000184486/ENSG00000152192/ENSG00000128710/ENSG00000016082/ENSG00000007372/ENSG00000163623/ENSG00000180818/ENSG00000138136/ENSG00000104313/ENSG00000142700/ENSG00000125820/ENSG00000126778/ENSG00000159556/ENSG00000172238/ENSG00000064218	GLI2/POU3F2/POU4F1/HOXD10/ISL1/PAX6/NKX6-1/HOXC10/LBX1/EYA1/DMRTA2/NKX2-2/SIX1/ISL2/ATOH1/DMRT3	16
BP	GO:0008589	regulation of smoothened signaling pathway	29|2417	72|14725	1.15227e-06	0.000132181	ENSG00000147257/ENSG00000109113/ENSG00000128602/ENSG00000074047/ENSG00000180447/ENSG00000072840/ENSG00000143147/ENSG00000185920/ENSG00000164066/ENSG00000104332/ENSG00000187240/ENSG00000168779/ENSG00000135919/ENSG00000117425/ENSG00000116132/ENSG00000113966/ENSG00000103494/ENSG00000069667/ENSG00000165588/ENSG00000159307/ENSG00000168301/ENSG00000146197/ENSG00000106524/ENSG00000102678/ENSG00000111087…	GPC3/RAB34/SMO/GLI2/GAS1/EVC/GPR161/PTCH1/INTU/SFRP1/DYNC2H1/SHOX2/SERPINE2/PTCH2/PRRX1/ARL6/RPGRIP1L/RORA/OTX2/SCUBE1/KCTD6/SCUBE3/ANKMY2/FGF9/GLI1/TRAF3IP1/KIF7/PRKACB/DISP1	29
BP	GO:2000177	regulation of neural precursor cell proliferation	30|2417	76|14725	1.25779e-06	0.000141401	ENSG00000102038/ENSG00000170558/ENSG00000128602/ENSG00000074047/ENSG00000114251/ENSG00000007372/ENSG00000176165/ENSG00000148704/ENSG00000117707/ENSG00000108576/ENSG00000142700/ENSG00000173404/ENSG00000064309/ENSG00000112333/ENSG00000206557/ENSG00000135638/ENSG00000107859/ENSG00000188906/ENSG00000162946/ENSG00000106278/ENSG00000150907/ENSG00000117569/ENSG00000066279/ENSG00000138083/ENSG00000111087…	SMARCA1/CDH2/SMO/GLI2/WNT5A/PAX6/FOXG1/VAX1/PROX1/SLC6A4/DMRTA2/INSM1/CDON/NR2E1/TRIM71/EMX1/PITX3/LRRK2/DISC1/PTPRZ1/FOXO1/PTBP2/ASPM/SIX3/GLI1/AFDN/LYN/WNT3A/FZD3/CTSZ	30
BP	GO:0061351	neural precursor cell proliferation	44|2417	132|14725	1.33292e-06	0.000146909	ENSG00000159217/ENSG00000102038/ENSG00000170558/ENSG00000128602/ENSG00000184486/ENSG00000114251/ENSG00000165655/ENSG00000138795/ENSG00000169554/ENSG00000007372/ENSG00000176165/ENSG00000198914/ENSG00000148704/ENSG00000117707/ENSG00000108576/ENSG00000134532/ENSG00000142700/ENSG00000154928/ENSG00000170370/ENSG00000173404/ENSG00000064309/ENSG00000112333/ENSG00000206557/ENSG00000135638/ENSG00000107859…	IGF2BP1/SMARCA1/CDH2/SMO/POU3F2/WNT5A/ZNF503/LEF1/ZEB2/PAX6/FOXG1/POU3F3/VAX1/PROX1/SLC6A4/SOX5/DMRTA2/EPHB1/EMX2/INSM1/CDON/NR2E1/TRIM71/EMX1/PITX3/RORA/LRRK2/DOCK7/DISC1/PTPRZ1/FOXO1/PTBP2/KIF3A/ASPM/DIXDC1/HOOK3/SIX3/AFDN/LYN/ID4/RRM1/WNT3A/FZD3/CTSZ	44
BP	GO:0060021	roof of mouth development	31|2417	81|14725	1.84401e-06	0.000199166	ENSG00000184058/ENSG00000052850/ENSG00000019549/ENSG00000114251/ENSG00000069702/ENSG00000137273/ENSG00000138795/ENSG00000122691/ENSG00000006377/ENSG00000180318/ENSG00000105880/ENSG00000148704/ENSG00000173068/ENSG00000164107/ENSG00000081189/ENSG00000178919/ENSG00000178860/ENSG00000138686/ENSG00000139219/ENSG00000119042/ENSG00000116132/ENSG00000163132/ENSG00000162878/ENSG00000134853/ENSG00000179981…	TBX1/ALX4/SNAI2/WNT5A/TGFBR3/FOXF2/LEF1/TWIST1/DLX6/ALX1/DLX5/VAX1/BNC2/HAND2/MEF2C/FOXE1/MSC/BBS7/COL2A1/SATB2/PRRX1/MSX1/PKDCC/PDGFRA/TSHZ1/BCOR/ACVR2B/OSR1/WNT3A/ASPH/TBX3	31
BP	GO:0001709	cell fate determination	18|2417	35|14725	1.87792e-06	0.000199166	ENSG00000016082/ENSG00000007372/ENSG00000176165/ENSG00000185920/ENSG00000117707/ENSG00000138136/ENSG00000081189/ENSG00000075891/ENSG00000143032/ENSG00000117425/ENSG00000125820/ENSG00000116132/ENSG00000105996/ENSG00000221818/ENSG00000003137/ENSG00000106536/ENSG00000172238/ENSG00000129152	ISL1/PAX6/FOXG1/PTCH1/PROX1/LBX1/MEF2C/PAX2/BARHL2/PTCH2/NKX2-2/PRRX1/HOXA2/EBF2/CYP26B1/POU6F2/ATOH1/MYOD1	18
BP	GO:0048566	embryonic digestive tract development	16|2417	30|14725	3.78749e-06	0.00039425	ENSG00000074047/ENSG00000128918/ENSG00000136630/ENSG00000103449/ENSG00000077092/ENSG00000137273/ENSG00000170577/ENSG00000103241/ENSG00000099139/ENSG00000081059/ENSG00000164093/ENSG00000168779/ENSG00000162878/ENSG00000134853/ENSG00000102678/ENSG00000166831	GLI2/ALDH1A2/HLX/SALL1/RARB/FOXF2/SIX2/FOXF1/PCSK5/TCF7/PITX2/SHOX2/PKDCC/PDGFRA/FGF9/RBPMS2	16
BP	GO:0001763	morphogenesis of a branching structure	54|2417	182|14725	5.2596e-06	0.000537532	ENSG00000147257/ENSG00000162738/ENSG00000128602/ENSG00000106004/ENSG00000074047/ENSG00000159184/ENSG00000143869/ENSG00000005073/ENSG00000128714/ENSG00000125931/ENSG00000019549/ENSG00000114251/ENSG00000103449/ENSG00000187498/ENSG00000128713/ENSG00000138795/ENSG00000119866/ENSG00000170577/ENSG00000138685/ENSG00000103241/ENSG00000145147/ENSG00000119630/ENSG00000166341/ENSG00000197467/ENSG00000005513…	GPC3/VANGL2/SMO/HOXA5/GLI2/HOXB13/GDF7/HOXA11/HOXD13/CITED1/SNAI2/WNT5A/SALL1/COL4A1/HOXD11/LEF1/BCL11A/SIX2/FGF2/FOXF1/SLIT2/PGF/DCHS1/COL13A1/SOX8/WT1/PTCH1/PROX1/EPHA7/SEMA3A/PITX2/EYA1/SFRP1/PAX2/SHOX2/DLX2/TBX20/PAK1/NKX2-1/FAT4/CAV3/GCM1/LRRK2/SIX1/FOXC2/SPRY2/TNC/NOG/SULF1/EDNRA/MED1/RDH10/CTSZ/TBX3	54
BP	GO:0061448	connective tissue development	62|2417	219|14725	5.98783e-06	0.000601028	ENSG00000149948/ENSG00000148516/ENSG00000106004/ENSG00000074047/ENSG00000143869/ENSG00000105997/ENSG00000005073/ENSG00000019549/ENSG00000114251/ENSG00000072840/ENSG00000077092/ENSG00000120093/ENSG00000170577/ENSG00000138685/ENSG00000178573/ENSG00000005513/ENSG00000184937/ENSG00000180318/ENSG00000110693/ENSG00000134532/ENSG00000113196/ENSG00000164107/novel.261/ENSG00000009709/ENSG00000081189/ENSG0…	HMGA2/ZEB1/HOXA5/GLI2/GDF7/HOXA3/HOXA11/SNAI2/WNT5A/EVC/RARB/HOXB3/SIX2/FGF2/MAF/SOX8/WT1/ALX1/SOX6/SOX5/HAND1/HAND2/-/PAX7/MEF2C/SPART/HOXC4/SHOX2/DLX2/SMAD9/SH3PXD2B/COL2A1/UNCX/SATB2/RFLNB/PRRX1/NKX3-2/COMP/MSX1/PKDCC/BMP6/EBF2/TNMD/ROR2/AC006254.1/FOXC2/ZBTB16/GDF6/FTO/CD34/COL27A1/NOG/FGF9/WNT10B/TMEM110-MUSTN1/PDGFRB/OXCT1/HOXD3/SULF1/OSR1/ID4/SIRT1	62
BP	GO:0007409	axonogenesis	103|2417	417|14725	7.19723e-06	0.000709747	ENSG00000165300/ENSG00000154277/ENSG00000149294/ENSG00000162738/ENSG00000074047/ENSG00000143869/ENSG00000155980/ENSG00000166313/ENSG00000277586/ENSG00000184486/ENSG00000183853/ENSG00000152192/ENSG00000114251/ENSG00000010810/ENSG00000016082/ENSG00000072832/ENSG00000185008/ENSG00000169554/ENSG00000131711/ENSG00000188517/ENSG00000171517/ENSG00000007372/ENSG00000176165/ENSG00000163623/ENSG00000121871…	SLITRK5/UCHL1/NCAM1/VANGL2/GLI2/GDF7/KIF5A/APBB1/NEFL/POU3F2/KIRREL1/POU4F1/WNT5A/FYN/ISL1/CRMP1/ROBO2/ZEB2/MAP1B/COL25A1/LPAR3/PAX6/FOXG1/NKX6-1/SLITRK3/SLIT2/ROBO3/AUTS2/PRKCQ/PTCH1/EPHA8/DLX5/FOXB1/SLC9A6/VAX1/EPHA5/EPHA7/TUBB2B/SEMA3A/BRSK1/SPART/PTPRM/PAX2/SHOX2/ETV1/EPHB1/NRP2/MYH10/BARHL2/RNF165/LAMA2/SEMA3G/LRP4/LHX9/PAK1/NR2E1/NKX2-1/GAP43/NLGN3/HOXA2/USP33/NPTX1/ATL1/PLXNA2/GBX1/PAK3/PL…	103
BP	GO:0043010	camera-type eye development	72|2417	268|14725	8.57527e-06	0.000831062	ENSG00000152661/ENSG00000138829/ENSG00000050555/ENSG00000148516/ENSG00000128573/ENSG00000177707/ENSG00000128918/ENSG00000114251/ENSG00000187498/ENSG00000077092/ENSG00000137273/ENSG00000169554/ENSG00000007372/ENSG00000166402/ENSG00000122691/ENSG00000178573/ENSG00000005513/ENSG00000184937/ENSG00000132386/ENSG00000054598/ENSG00000148704/ENSG00000117707/ENSG00000164093/ENSG00000146350/ENSG00000173482…	GJA1/FBN2/LAMC3/ZEB1/FOXP2/NECTIN3/ALDH1A2/WNT5A/COL4A1/RARB/FOXF2/ZEB2/PAX6/TUB/TWIST1/MAF/SOX8/WT1/SERPINF1/FOXC1/VAX1/PROX1/PITX2/TBC1D32/PTPRM/NPHP1/PAX2/EPHB1/DLX2/MERTK/MYH10/MAB21L1/MYOM2/GPM6A/CDON/MYH15/NR2E1/ARL6/RPGRIP1L/PITX3/MEIS1/FOXN4/SDK2/TSPAN12/FOXC2/CCDC66/PDGFRA/RORB/HDAC2/NTRK2/ACVR2B/SIX3/WDR19/EGFR/AGTPBP1/TRAF3IP1/ATP2B4/PDGFRB/SLC4A5/CELF4/HDAC1/FBN1/CACNA1C/MED1/RRM1/MIT…	72
BP	GO:0042476	odontogenesis	37|2417	111|14725	9.00946e-06	0.000858342	ENSG00000184058/ENSG00000128602/ENSG00000074047/ENSG00000091136/ENSG00000183873/ENSG00000138795/ENSG00000122691/ENSG00000054598/ENSG00000113196/ENSG00000164107/ENSG00000164093/ENSG00000140090/ENSG00000115844/ENSG00000162624/ENSG00000134569/ENSG00000104267/ENSG00000162551/ENSG00000163132/ENSG00000171243/ENSG00000186951/ENSG00000125046/ENSG00000240583/ENSG00000178522/ENSG00000134853/ENSG00000150907…	TBX1/SMO/GLI2/LAMB1/SCN5A/LEF1/TWIST1/FOXC1/HAND1/HAND2/PITX2/SLC24A4/DLX2/LHX8/LRP4/CA2/ALPL/MSX1/SOSTDC1/PPARA/SSUH2/AQP1/AMBN/PDGFRA/FOXO1/HDAC2/ITGA6/TNC/BCOR/CD34/EDA/ACVR2B/HDAC1/DMRT3/OSR1/PAM/AQP6	37
BP	GO:0010001	glial cell differentiation	53|2417	181|14725	9.74081e-06	0.000912552	ENSG00000170558/ENSG00000084207/ENSG00000050555/ENSG00000128602/ENSG00000184486/ENSG00000146122/ENSG00000138795/ENSG00000185483/ENSG00000007372/ENSG00000163623/ENSG00000205927/ENSG00000005513/ENSG00000198121/ENSG00000163884/ENSG00000110693/ENSG00000136717/ENSG00000198947/ENSG00000134198/ENSG00000075891/ENSG00000115844/ENSG00000124920/ENSG00000135919/ENSG00000162367/ENSG00000196569/ENSG00000138675…	CDH2/GSTP1/LAMC3/SMO/POU3F2/DAAM2/LEF1/ROR1/PAX6/NKX6-1/OLIG2/SOX8/LPAR1/KLF15/SOX6/BIN1/DMD/TSPAN2/PAX2/DLX2/MYRF/SERPINE2/TAL1/LAMA2/FGF5/NKX2-2/NR2E1/NKX2-1/GAP43/NLGN3/TP73/EMX1/ROR2/NAB1/GCM1/SLC8A3/OLIG1/WASF3/PTPRZ1/PRDM8/POU3F1/HDAC2/CNTF/NTRK2/NOG/CDKN2C/AFDN/EGFR/LYN/ID4/ZNF488/CNTNAP1/EIF2B3	53
BP	GO:0048934	peripheral nervous system neuron differentiation	9|2417	12|14725	1.16633e-05	0.00105741	ENSG00000152192/ENSG00000128710/ENSG00000016082/ENSG00000128709/ENSG00000164107/ENSG00000006468/ENSG00000159556/ENSG00000148053/ENSG00000119547	POU4F1/HOXD10/ISL1/HOXD9/HAND2/ETV1/ISL2/NTRK2/ONECUT2	9
BP	GO:0048935	peripheral nervous system neuron development	9|2417	12|14725	1.16633e-05	0.00105741	ENSG00000152192/ENSG00000128710/ENSG00000016082/ENSG00000128709/ENSG00000164107/ENSG00000006468/ENSG00000159556/ENSG00000148053/ENSG00000119547	POU4F1/HOXD10/ISL1/HOXD9/HAND2/ETV1/ISL2/NTRK2/ONECUT2	9
BP	GO:0048839	inner ear development	50|2417	169|14725	1.26058e-05	0.00112472	ENSG00000162738/ENSG00000184058/ENSG00000148516/ENSG00000074047/ENSG00000114251/ENSG00000055732/ENSG00000105991/ENSG00000153291/ENSG00000185483/ENSG00000176165/ENSG00000178573/ENSG00000166341/ENSG00000006377/ENSG00000105928/ENSG00000119715/ENSG00000112319/ENSG00000107736/ENSG00000095777/ENSG00000105880/ENSG00000117707/ENSG00000006611/ENSG00000099954/ENSG00000104313/ENSG00000077943/ENSG00000075891…	VANGL2/TBX1/ZEB1/GLI2/WNT5A/MCOLN3/HOXA1/SLC25A27/ROR1/FOXG1/MAF/DCHS1/DLX6/GSDME/ESRRB/EYA4/CDH23/MYO3A/DLX5/PROX1/USH1C/CECR2/EYA1/ITGA8/PAX2/LGR5/COL2A1/SOBP/PRRX1/FAT4/PLPPR4/RPGRIP1L/ROR2/BMPER/CEP290/SIX1/SPARC/SPRY2/ATOH1/TSHR/KIF3A/FGF9/PDGFRB/TMIE/HMX2/HMX3/PDZD7/WNT3A/FZD3/KCNQ1	50
BP	GO:0035282	segmentation	29|2417	80|14725	1.35671e-05	0.00119157	ENSG00000114251/ENSG00000165556/ENSG00000138795/ENSG00000169554/ENSG00000103241/ENSG00000184937/ENSG00000054598/ENSG00000090932/ENSG00000171956/ENSG00000140807/ENSG00000075213/ENSG00000104332/ENSG00000125813/ENSG00000149311/ENSG00000143033/ENSG00000105996/ENSG00000076356/ENSG00000203877/ENSG00000169071/ENSG00000176692/ENSG00000175879/ENSG00000253729/ENSG00000164458/ENSG00000143867/ENSG00000154342…	WNT5A/CDX2/LEF1/ZEB2/FOXF1/WT1/FOXC1/DLL3/FOXB1/NKD1/SEMA3A/SFRP1/PAX1/ATM/MTF2/HOXA2/PLXNA2/RIPPLY2/ROR2/FOXC2/HOXD8/PRKDC/TBXT/OSR1/WNT3A/MIB1/MEOX1/MLLT3/TBX3	29
BP	GO:0021543	pallium development	47|2417	157|14725	1.61756e-05	0.00138146	ENSG00000159217/ENSG00000170558/ENSG00000128602/ENSG00000128573/ENSG00000277586/ENSG00000184486/ENSG00000091136/ENSG00000138795/ENSG00000169554/ENSG00000007372/ENSG00000176165/ENSG00000145147/ENSG00000198914/ENSG00000144868/ENSG00000117707/ENSG00000145242/ENSG00000198947/ENSG00000075213/ENSG00000142700/ENSG00000115844/ENSG00000170370/ENSG00000064309/ENSG00000112333/ENSG00000136352/ENSG00000196159…	IGF2BP1/CDH2/SMO/FOXP2/NEFL/POU3F2/LAMB1/LEF1/ZEB2/PAX6/FOXG1/SLIT2/POU3F3/TMEM108/PROX1/EPHA5/DMD/SEMA3A/DMRTA2/DLX2/EMX2/CDON/NR2E1/NKX2-1/FAT4/EMX1/DCLK2/FUT10/GART/NPY/ATOH1/KIF3A/NTRK2/ASPM/DIXDC1/AFDN/EGFR/ATP2B4/MFSD2A/GNG12/ID4/WNT3A/HTR6/FEZ1/EFHC1/MCPH1/EIF2B3	47
BP	GO:0021675	nerve development	25|2417	65|14725	1.62207e-05	0.00138146	ENSG00000079215/ENSG00000184058/ENSG00000105997/ENSG00000152192/ENSG00000103449/ENSG00000016082/ENSG00000105991/ENSG00000120093/ENSG00000188517/ENSG00000198121/ENSG00000198947/ENSG00000075213/ENSG00000075891/ENSG00000154928/ENSG00000118257/ENSG00000135919/ENSG00000141622/ENSG00000125820/ENSG00000171246/ENSG00000173917/ENSG00000177301/ENSG00000126778/ENSG00000198400/ENSG00000128652/ENSG00000137573	SLC1A3/TBX1/HOXA3/POU4F1/SALL1/ISL1/HOXA1/HOXB3/COL25A1/LPAR1/DMD/SEMA3A/PAX2/EPHB1/NRP2/SERPINE2/RNF165/NKX2-2/NPTX1/HOXB2/KCNA2/SIX1/NTRK1/HOXD3/SULF1	25
BP	GO:0030902	hindbrain development	41|2417	131|14725	1.72521e-05	0.00144737	ENSG00000116729/ENSG00000128602/ENSG00000074047/ENSG00000128573/ENSG00000128918/ENSG00000152192/ENSG00000183873/ENSG00000138795/ENSG00000120093/ENSG00000018236/ENSG00000163064/ENSG00000198121/ENSG00000054598/ENSG00000117707/ENSG00000108576/ENSG00000166165/ENSG00000129159/ENSG00000120693/ENSG00000133026/ENSG00000135919/ENSG00000149269/ENSG00000105996/ENSG00000180616/ENSG00000173917/ENSG00000076356…	WLS/SMO/GLI2/FOXP2/ALDH1A2/POU4F1/SCN5A/LEF1/HOXB3/CNTN1/EN1/LPAR1/FOXC1/PROX1/SLC6A4/CKB/KCNC1/SMAD9/MYH10/SERPINE2/PAK1/HOXA2/SSTR2/HOXB2/PLXNA2/TTBK2/RPGRIP1L/RORA/EN2/GNPAT/CEP290/GART/GRID2/CBLN1/PTBP2/NOG/GLI1/AGTPBP1/HNRNPD/RBFOX2/NEUROD2	41
BP	GO:0001946	lymphangiogenesis	10|2417	15|14725	1.88142e-05	0.00155522	ENSG00000162493/ENSG00000037280/ENSG00000054598/ENSG00000117707/ENSG00000183287/ENSG00000152104/ENSG00000176692/ENSG00000114739/ENSG00000071246/ENSG00000119608	PDPN/FLT4/FOXC1/PROX1/CCBE1/PTPN14/FOXC2/ACVR2B/VASH1/PROX2	10
BP	GO:0035136	forelimb morphogenesis	17|2417	37|14725	2.48074e-05	0.0019978	ENSG00000005073/ENSG00000128918/ENSG00000052850/ENSG00000128710/ENSG00000122691/ENSG00000163064/ENSG00000128709/ENSG00000168779/ENSG00000141622/ENSG00000122707/ENSG00000163132/ENSG00000103494/ENSG00000109906/ENSG00000143867/ENSG00000151067/ENSG00000121039/ENSG00000135111	HOXA11/ALDH1A2/ALX4/HOXD10/TWIST1/EN1/HOXD9/SHOX2/RNF165/RECK/MSX1/RPGRIP1L/ZBTB16/OSR1/CACNA1C/RDH10/TBX3	17
BP	GO:0021545	cranial nerve development	19|2417	44|14725	2.48792e-05	0.0019978	ENSG00000079215/ENSG00000184058/ENSG00000105997/ENSG00000152192/ENSG00000103449/ENSG00000016082/ENSG00000105991/ENSG00000120093/ENSG00000198121/ENSG00000198947/ENSG00000075213/ENSG00000075891/ENSG00000154928/ENSG00000125820/ENSG00000173917/ENSG00000177301/ENSG00000126778/ENSG00000198400/ENSG00000128652	SLC1A3/TBX1/HOXA3/POU4F1/SALL1/ISL1/HOXA1/HOXB3/LPAR1/DMD/SEMA3A/PAX2/EPHB1/NKX2-2/HOXB2/KCNA2/SIX1/NTRK1/HOXD3	19
BP	GO:0048738	cardiac muscle tissue development	53|2417	187|14725	2.66381e-05	0.00210891	ENSG00000152661/ENSG00000182963/ENSG00000128918/ENSG00000112276/ENSG00000152192/ENSG00000114251/ENSG00000183072/ENSG00000069702/ENSG00000016082/ENSG00000077092/ENSG00000162614/ENSG00000138685/ENSG00000183023/ENSG00000169946/ENSG00000184937/ENSG00000077522/ENSG00000110693/ENSG00000054598/ENSG00000117707/ENSG00000113196/ENSG00000081189/ENSG00000154639/ENSG00000173706/ENSG00000164093/ENSG00000133026…	GJA1/GJC1/ALDH1A2/BVES/POU4F1/WNT5A/NKX2-5/TGFBR3/ISL1/RARB/NEXN/FGF2/SLC8A1/ZFPM2/WT1/ACTN2/SOX6/FOXC1/PROX1/HAND1/MEF2C/CXADR/HEG1/PITX2/MYH10/TTN/S1PR1/TBX20/SORBS2/PAK1/ACADM/TP73/MEIS1/CAV3/FOXC2/DSG2/PDGFRA/EGLN1/NOG/FGF9/GLI1/HNRNPU/FHOD3/PDGFRB/DDX39B/SAV1/PTCD2/MED1/WNT3A/AKAP6/PROX2/SGCB/TBX3	53
BP	GO:0061053	somite development	27|2417	75|14725	3.06963e-05	0.00239644	ENSG00000128602/ENSG00000114251/ENSG00000165556/ENSG00000138795/ENSG00000169554/ENSG00000103241/ENSG00000185920/ENSG00000054598/ENSG00000090932/ENSG00000171956/ENSG00000140807/ENSG00000104332/ENSG00000125813/ENSG00000149311/ENSG00000076356/ENSG00000069248/ENSG00000203877/ENSG00000169071/ENSG00000126778/ENSG00000176692/ENSG00000183691/ENSG00000157796/ENSG00000253729/ENSG00000164458/ENSG00000154342…	SMO/WNT5A/CDX2/LEF1/ZEB2/FOXF1/PTCH1/FOXC1/DLL3/FOXB1/NKD1/SFRP1/PAX1/ATM/PLXNA2/NUP133/RIPPLY2/ROR2/SIX1/FOXC2/NOG/WDR19/PRKDC/TBXT/WNT3A/MIB1/MEOX1	27
BP	GO:0035270	endocrine system development	37|2417	117|14725	3.38485e-05	0.00260633	ENSG00000184058/ENSG00000128602/ENSG00000106004/ENSG00000074047/ENSG00000105997/ENSG00000184486/ENSG00000128918/ENSG00000114251/ENSG00000183072/ENSG00000103449/ENSG00000016082/ENSG00000120093/ENSG00000007372/ENSG00000163623/ENSG00000184937/ENSG00000050165/ENSG00000164093/ENSG00000139515/ENSG00000178919/ENSG00000125813/ENSG00000134954/ENSG00000125820/ENSG00000173404/ENSG00000136352/ENSG00000163132…	TBX1/SMO/HOXA5/GLI2/HOXA3/POU3F2/ALDH1A2/WNT5A/NKX2-5/SALL1/ISL1/HOXB3/PAX6/NKX6-1/WT1/DKK3/PITX2/PDX1/FOXE1/PAX1/ETS1/NKX2-2/INSM1/NKX2-1/MSX1/BMP6/SIX1/PDGFRA/FOXO1/SIX3/NOG/GLI1/RFX6/ONECUT2/HOXD3/TBX19/NR5A1	37
BP	GO:0021522	spinal cord motor neuron differentiation	15|2417	31|14725	3.48795e-05	0.0026141	ENSG00000074047/ENSG00000128710/ENSG00000016082/ENSG00000007372/ENSG00000163623/ENSG00000126970/ENSG00000180818/ENSG00000205927/ENSG00000185920/ENSG00000138136/ENSG00000187240/ENSG00000164532/ENSG00000125820/ENSG00000164900/ENSG00000159556	GLI2/HOXD10/ISL1/PAX6/NKX6-1/ZC4H2/HOXC10/OLIG2/PTCH1/LBX1/DYNC2H1/TBX20/NKX2-2/GBX1/ISL2	15
BP	GO:0045880	positive regulation of smoothened signaling pathway	15|2417	31|14725	3.48795e-05	0.0026141	ENSG00000147257/ENSG00000109113/ENSG00000128602/ENSG00000072840/ENSG00000164066/ENSG00000104332/ENSG00000187240/ENSG00000168779/ENSG00000116132/ENSG00000159307/ENSG00000146197/ENSG00000102678/ENSG00000111087/ENSG00000166813/ENSG00000154309	GPC3/RAB34/SMO/EVC/INTU/SFRP1/DYNC2H1/SHOX2/PRRX1/SCUBE1/SCUBE3/FGF9/GLI1/KIF7/DISP1	15
BP	GO:0060538	skeletal muscle organ development	46|2417	158|14725	4.29015e-05	0.00317302	ENSG00000233276/ENSG00000184058/ENSG00000128602/ENSG00000128573/ENSG00000112276/ENSG00000136630/ENSG00000128710/ENSG00000179456/ENSG00000122691/ENSG00000005513/ENSG00000184937/ENSG00000128709/ENSG00000148704/ENSG00000198947/ENSG00000009709/ENSG00000081189/ENSG00000164093/ENSG00000142700/ENSG00000168779/ENSG00000154928/ENSG00000170162/ENSG00000178860/ENSG00000036448/ENSG00000239474/ENSG00000095587…	GPX1/TBX1/SMO/FOXP2/BVES/HLX/HOXD10/ZBTB18/TWIST1/SOX8/WT1/HOXD9/VAX1/DMD/PAX7/MEF2C/PITX2/DMRTA2/SHOX2/EPHB1/VGLL2/MSC/MYOM2/KLHL41/TLL2/CDON/MYH15/COL19A1/HEYL/HDAC9/CYP26B1/CNTFR/ACTA1/SIX1/MEGF10/CFL2/MSTN/MYOD1/HLF/KCNAB1/WNT10B/ATF3/DDX17/WNT3A/ZNF689/DISP1	46
BP	GO:0072073	kidney epithelium development	39|2417	127|14725	4.41197e-05	0.0032109	ENSG00000147257/ENSG00000128602/ENSG00000005073/ENSG00000125931/ENSG00000103449/ENSG00000077092/ENSG00000128713/ENSG00000185008/ENSG00000170577/ENSG00000138685/ENSG00000081181/ENSG00000145147/ENSG00000119630/ENSG00000166341/ENSG00000198914/ENSG00000005513/ENSG00000184937/ENSG00000163884/ENSG00000185920/ENSG00000054598/ENSG00000135333/ENSG00000081189/ENSG00000104313/ENSG00000126562/ENSG00000104332…	GPC3/SMO/HOXA11/CITED1/SALL1/RARB/HOXD11/ROBO2/SIX2/FGF2/ARG2/SLIT2/PGF/DCHS1/POU3F3/SOX8/WT1/KLF15/PTCH1/FOXC1/EPHA7/MEF2C/EYA1/WNK4/SFRP1/PAX2/SMAD9/KLHL3/HEYL/FAT4/BMPER/SIX1/FOXC2/PTPRO/SIM1/CD34/NOG/OSR1/NUP93	39
BP	GO:0007411	axon guidance	60|2417	223|14725	4.45561e-05	0.0032109	ENSG00000149294/ENSG00000162738/ENSG00000074047/ENSG00000143869/ENSG00000155980/ENSG00000183853/ENSG00000114251/ENSG00000010810/ENSG00000016082/ENSG00000072832/ENSG00000185008/ENSG00000007372/ENSG00000176165/ENSG00000145147/ENSG00000154134/ENSG00000065675/ENSG00000185920/ENSG00000070886/ENSG00000105880/ENSG00000148704/ENSG00000145242/ENSG00000135333/ENSG00000137285/ENSG00000075213/ENSG00000173482…	NCAM1/VANGL2/GLI2/GDF7/KIF5A/KIRREL1/WNT5A/FYN/ISL1/CRMP1/ROBO2/PAX6/FOXG1/SLIT2/ROBO3/PRKCQ/PTCH1/EPHA8/DLX5/VAX1/EPHA5/EPHA7/TUBB2B/SEMA3A/PTPRM/ETV1/EPHB1/NRP2/MYH10/RNF165/LAMA2/LHX9/NKX2-1/GAP43/HOXA2/USP33/PLXNA2/GBX1/FLRT3/UNC5C/NFASC/NRXN3/OTX2/SLIT3/GRB10/SEMA6A/ISL2/PTPRO/ATOH1/ENAH/UNC5B/NOG/SEMA6C/BOC/NTRK1/B4GAT1/PRKCA/WNT3A/FEZ1/FZD3	60
BP	GO:0042472	inner ear morphogenesis	31|2417	93|14725	4.67e-05	0.00332279	ENSG00000162738/ENSG00000184058/ENSG00000148516/ENSG00000074047/ENSG00000114251/ENSG00000105991/ENSG00000176165/ENSG00000006377/ENSG00000095777/ENSG00000105880/ENSG00000117707/ENSG00000006611/ENSG00000104313/ENSG00000077943/ENSG00000075891/ENSG00000139219/ENSG00000112320/ENSG00000116132/ENSG00000169071/ENSG00000198707/ENSG00000126778/ENSG00000136158/ENSG00000172238/ENSG00000165409/ENSG00000102678…	VANGL2/TBX1/ZEB1/GLI2/WNT5A/HOXA1/FOXG1/DLX6/MYO3A/DLX5/PROX1/USH1C/EYA1/ITGA8/PAX2/COL2A1/SOBP/PRRX1/ROR2/CEP290/SIX1/SPRY2/ATOH1/TSHR/FGF9/TMIE/HMX2/HMX3/PDZD7/WNT3A/FZD3	31
BP	GO:0060041	retina development in camera-type eye	38|2417	123|14725	4.74698e-05	0.00333535	ENSG00000050555/ENSG00000177707/ENSG00000187498/ENSG00000077092/ENSG00000007372/ENSG00000166402/ENSG00000005513/ENSG00000132386/ENSG00000117707/ENSG00000146350/ENSG00000173482/ENSG00000144061/ENSG00000075891/ENSG00000115844/ENSG00000153208/ENSG00000133026/ENSG00000150625/ENSG00000064309/ENSG00000112333/ENSG00000113966/ENSG00000139445/ENSG00000069188/ENSG00000106025/ENSG00000180376/ENSG00000134853…	LAMC3/NECTIN3/COL4A1/RARB/PAX6/TUB/SOX8/SERPINF1/PROX1/TBC1D32/PTPRM/NPHP1/PAX2/DLX2/MERTK/MYH10/GPM6A/CDON/NR2E1/ARL6/FOXN4/SDK2/TSPAN12/CCDC66/PDGFRA/RORB/NTRK2/ACVR2B/SIX3/AGTPBP1/ATP2B4/PDGFRB/SLC4A5/CELF4/MED1/RRM1/MEGF11/PDE6C	38
BP	GO:0051216	cartilage development	48|2417	168|14725	5.00893e-05	0.00347595	ENSG00000149948/ENSG00000148516/ENSG00000106004/ENSG00000074047/ENSG00000105997/ENSG00000005073/ENSG00000019549/ENSG00000114251/ENSG00000072840/ENSG00000077092/ENSG00000120093/ENSG00000170577/ENSG00000138685/ENSG00000178573/ENSG00000180318/ENSG00000110693/ENSG00000134532/ENSG00000113196/ENSG00000164107/novel.261/ENSG00000009709/ENSG00000081189/ENSG00000198353/ENSG00000168779/ENSG00000115844/ENSG0…	HMGA2/ZEB1/HOXA5/GLI2/HOXA3/HOXA11/SNAI2/WNT5A/EVC/RARB/HOXB3/SIX2/FGF2/MAF/ALX1/SOX6/SOX5/HAND1/HAND2/-/PAX7/MEF2C/HOXC4/SHOX2/DLX2/SMAD9/COL2A1/UNCX/SATB2/RFLNB/PRRX1/NKX3-2/COMP/MSX1/PKDCC/BMP6/ROR2/AC006254.1/ZBTB16/GDF6/COL27A1/NOG/FGF9/WNT10B/TMEM110-MUSTN1/HOXD3/SULF1/OSR1	48
BP	GO:0060415	muscle tissue morphogenesis	24|2417	65|14725	5.20835e-05	0.00357026	ENSG00000162738/ENSG00000184058/ENSG00000152192/ENSG00000114251/ENSG00000183072/ENSG00000069702/ENSG00000016082/ENSG00000169946/ENSG00000054598/ENSG00000117707/ENSG00000113196/ENSG00000009709/ENSG00000173706/ENSG00000164093/ENSG00000168779/ENSG00000155657/ENSG00000170989/ENSG00000164532/ENSG00000176692/ENSG00000135766/ENSG00000183691/ENSG00000065534/ENSG00000049883/ENSG00000125686	VANGL2/TBX1/POU4F1/WNT5A/NKX2-5/TGFBR3/ISL1/ZFPM2/FOXC1/PROX1/HAND1/PAX7/HEG1/PITX2/SHOX2/TTN/S1PR1/TBX20/FOXC2/EGLN1/NOG/MYLK/PTCD2/MED1	24
BP	GO:0044057	regulation of system process	104|2417	442|14725	5.66942e-05	0.0038395	ENSG00000152661/ENSG00000145362/ENSG00000182963/ENSG00000196632/ENSG00000121297/ENSG00000112276/ENSG00000184185/ENSG00000181104/ENSG00000183072/ENSG00000183873/ENSG00000087258/ENSG00000182389/ENSG00000148408/ENSG00000153956/ENSG00000183023/ENSG00000169760/ENSG00000213366/ENSG00000164107/ENSG00000198947/ENSG00000154639/ENSG00000075213/ENSG00000138193/ENSG00000116741/ENSG00000157404/ENSG00000126562…	GJA1/ANK2/GJC1/WNK3/TSHZ3/BVES/KCNJ12/F2R/NKX2-5/SCN5A/GNAO1/CACNB4/CACNA1B/CACNA2D1/SLC8A1/NLGN1/GSTM2/HAND2/DMD/CXADR/SEMA3A/PLCE1/RGS2/KIT/WNK4/CELF2/OPRD1/SPX/KCNB2/EDNRB/PARP1/ATP1B2/MYRF/TRPC3/TMEM100/SCN4B/UTRN/CACNA2D3/PRKG1/SCN3B/CHRM3/GUCY1A1/FXYD6/DOCK4/PAK1/SLC1A1/CACNG8/NLGN3/CALCRL/SSTR2/BMP6/TRPV1/CORIN/GAL/ADORA2B/APLN/FOXN4/AGTR1/RANGRF/CACNB2/CAV3/SLC8A3/SCN2B/TRPC1/HTR2C/FKBP1B…	104
BP	GO:0060485	mesenchyme development	60|2417	225|14725	5.89306e-05	0.00389705	ENSG00000149948/ENSG00000164683/ENSG00000184058/ENSG00000128602/ENSG00000106004/ENSG00000162493/ENSG00000128918/ENSG00000019549/ENSG00000114251/ENSG00000183072/ENSG00000069702/ENSG00000016082/ENSG00000137273/ENSG00000138795/ENSG00000169554/ENSG00000122691/ENSG00000170577/ENSG00000103241/ENSG00000166341/ENSG00000169946/ENSG00000005513/ENSG00000184937/ENSG00000180318/ENSG00000054598/ENSG00000090932…	HMGA2/HEY1/TBX1/SMO/HOXA5/PDPN/ALDH1A2/SNAI2/WNT5A/NKX2-5/TGFBR3/ISL1/FOXF2/LEF1/ZEB2/TWIST1/SIX2/FOXF1/DCHS1/ZFPM2/SOX8/WT1/ALX1/FOXC1/DLL3/BNC2/HAND1/HAND2/MEF2C/SEMA3A/PITX2/SFRP1/PAX2/PAX1/EDNRB/TMEM100/TBX20/RFLNB/NKX2-1/MSX1/HEYL/MIR221/DACT3/NUP133/HAS2/ACTA1/SIX1/FOXC2/HDAC2/NOG/FGF9/KBTBD8/DDX17/PDGFRB/OSR1/EDNRA/WNT3A/RGCC/RDH10/MEOX1	60
BP	GO:0097485	neuron projection guidance	60|2417	225|14725	5.89306e-05	0.00389705	ENSG00000149294/ENSG00000162738/ENSG00000074047/ENSG00000143869/ENSG00000155980/ENSG00000183853/ENSG00000114251/ENSG00000010810/ENSG00000016082/ENSG00000072832/ENSG00000185008/ENSG00000007372/ENSG00000176165/ENSG00000145147/ENSG00000154134/ENSG00000065675/ENSG00000185920/ENSG00000070886/ENSG00000105880/ENSG00000148704/ENSG00000145242/ENSG00000135333/ENSG00000137285/ENSG00000075213/ENSG00000173482…	NCAM1/VANGL2/GLI2/GDF7/KIF5A/KIRREL1/WNT5A/FYN/ISL1/CRMP1/ROBO2/PAX6/FOXG1/SLIT2/ROBO3/PRKCQ/PTCH1/EPHA8/DLX5/VAX1/EPHA5/EPHA7/TUBB2B/SEMA3A/PTPRM/ETV1/EPHB1/NRP2/MYH10/RNF165/LAMA2/LHX9/NKX2-1/GAP43/HOXA2/USP33/PLXNA2/GBX1/FLRT3/UNC5C/NFASC/NRXN3/OTX2/SLIT3/GRB10/SEMA6A/ISL2/PTPRO/ATOH1/ENAH/UNC5B/NOG/SEMA6C/BOC/NTRK1/B4GAT1/PRKCA/WNT3A/FEZ1/FZD3	60
BP	GO:0042475	odontogenesis of dentin-containing tooth	27|2417	78|14725	6.77155e-05	0.00442592	ENSG00000184058/ENSG00000128602/ENSG00000074047/ENSG00000183873/ENSG00000138795/ENSG00000054598/ENSG00000113196/ENSG00000164107/ENSG00000164093/ENSG00000140090/ENSG00000115844/ENSG00000162624/ENSG00000134569/ENSG00000104267/ENSG00000163132/ENSG00000171243/ENSG00000186951/ENSG00000178522/ENSG00000134853/ENSG00000150907/ENSG00000196591/ENSG00000091409/ENSG00000041982/ENSG00000158813/ENSG00000114739…	TBX1/SMO/GLI2/SCN5A/LEF1/FOXC1/HAND1/HAND2/PITX2/SLC24A4/DLX2/LHX8/LRP4/CA2/MSX1/SOSTDC1/PPARA/AMBN/PDGFRA/FOXO1/HDAC2/ITGA6/TNC/EDA/ACVR2B/HDAC1/DMRT3	27
BP	GO:0061138	morphogenesis of a branching epithelium	48|2417	170|14725	6.93155e-05	0.00447842	ENSG00000147257/ENSG00000162738/ENSG00000128602/ENSG00000106004/ENSG00000074047/ENSG00000159184/ENSG00000143869/ENSG00000005073/ENSG00000128714/ENSG00000125931/ENSG00000019549/ENSG00000114251/ENSG00000103449/ENSG00000187498/ENSG00000128713/ENSG00000138795/ENSG00000170577/ENSG00000138685/ENSG00000103241/ENSG00000145147/ENSG00000119630/ENSG00000166341/ENSG00000005513/ENSG00000184937/ENSG00000185920…	GPC3/VANGL2/SMO/HOXA5/GLI2/HOXB13/GDF7/HOXA11/HOXD13/CITED1/SNAI2/WNT5A/SALL1/COL4A1/HOXD11/LEF1/SIX2/FGF2/FOXF1/SLIT2/PGF/DCHS1/SOX8/WT1/PTCH1/PROX1/SEMA3A/PITX2/EYA1/SFRP1/PAX2/TBX20/PAK1/NKX2-1/FAT4/CAV3/GCM1/SIX1/FOXC2/SPRY2/TNC/NOG/SULF1/EDNRA/MED1/RDH10/CTSZ/TBX3	48
BP	GO:0042692	muscle cell differentiation	78|2417	314|14725	7.32536e-05	0.00467907	ENSG00000154277/ENSG00000233276/ENSG00000170558/ENSG00000164683/ENSG00000128591/ENSG00000184058/ENSG00000145362/ENSG00000148516/ENSG00000128602/ENSG00000162909/ENSG00000112276/ENSG00000183072/ENSG00000077092/ENSG00000138795/ENSG00000162614/ENSG00000183023/ENSG00000103241/ENSG00000135298/ENSG00000116761/ENSG00000184937/ENSG00000077522/ENSG00000110693/ENSG00000117707/ENSG00000136717/ENSG00000198947…	UCHL1/GPX1/CDH2/HEY1/FLNC/TBX1/ANK2/ZEB1/SMO/CAPN2/BVES/NKX2-5/RARB/LEF1/NEXN/SLC8A1/FOXF1/ADGRB3/CTH/WT1/ACTN2/SOX6/PROX1/BIN1/DMD/MYH3/SYNE1/MEF2C/CXADR/PITX2/KIT/ITGA8/SHOX2/EDNRB/MYH10/RAMP2/TTN/MYOM2/SORBS2/KLHL41/PAK1/CDON/MSX1/ACADM/MIR221/RORA/GLMN/HDAC9/CYP26B1/CAV3/PLPP7/ACTA1/SIX1/MEGF10/LMOD1/PDGFRA/CFL2/AVPR1A/CAMK1/MYOD1/MORF4L2/HNRNPU/BOC/WNT10B/FHOD3/PDGFRB/DDX39B/CACNA2D2/RBPMS2/…	78
BP	GO:0051962	positive regulation of nervous system development	106|2417	456|14725	8.09437e-05	0.00511218	ENSG00000165300/ENSG00000148516/ENSG00000128602/ENSG00000074047/ENSG00000196628/ENSG00000143869/ENSG00000166313/ENSG00000277586/ENSG00000181690/ENSG00000114251/ENSG00000150471/ENSG00000183072/ENSG00000010810/ENSG00000077092/ENSG00000131409/ENSG00000185008/ENSG00000169554/ENSG00000131711/ENSG00000171517/ENSG00000007372/ENSG00000176165/ENSG00000163623/ENSG00000018236/ENSG00000169760/ENSG00000135298…	SLITRK5/ZEB1/SMO/GLI2/TCF4/GDF7/APBB1/NEFL/PLAG1/WNT5A/ADGRL3/NKX2-5/FYN/RARB/LRRC4B/ROBO2/ZEB2/MAP1B/LPAR3/PAX6/FOXG1/NKX6-1/CNTN1/NLGN1/ADGRB3/SYT2/ZC4H2/SLITRK3/SLIT2/OLIG2/SOX8/LPAR1/PTPRD/SERPINF1/PROX1/BIN1/NDNF/DMD/MEF2C/TUBB2B/SEMA3A/KIT/DMRTA2/CUX2/PAX2/SHOX2/EPHB1/DLX2/BHLHB9/MYRF/SERPINE2/SERPINI1/LRRC7/NKX2-2/PAK1/CDON/NLGN3/HEYL/BMP6/ZNF804A/LTK/TP73/PRKD1/MIR221/PAK3/FLRT3/RGMA/PITX…	106
BP	GO:0048709	oligodendrocyte differentiation	28|2417	83|14725	8.4203e-05	0.00525894	ENSG00000084207/ENSG00000146122/ENSG00000007372/ENSG00000163623/ENSG00000205927/ENSG00000005513/ENSG00000198121/ENSG00000110693/ENSG00000134198/ENSG00000115844/ENSG00000124920/ENSG00000125820/ENSG00000136352/ENSG00000196338/ENSG00000078900/ENSG00000100678/ENSG00000184221/ENSG00000132970/ENSG00000106278/ENSG00000152784/ENSG00000196591/ENSG00000148053/ENSG00000123080/ENSG00000254087/ENSG00000172201…	GSTP1/DAAM2/PAX6/NKX6-1/OLIG2/SOX8/LPAR1/SOX6/TSPAN2/DLX2/MYRF/NKX2-2/NKX2-1/NLGN3/TP73/SLC8A3/OLIG1/WASF3/PTPRZ1/PRDM8/HDAC2/NTRK2/CDKN2C/LYN/ID4/ZNF488/CNTNAP1/EIF2B3	28
BP	GO:0042474	middle ear morphogenesis	11|2417	20|14725	8.97536e-05	0.00547919	ENSG00000184058/ENSG00000170577/ENSG00000104313/ENSG00000116132/ENSG00000109705/ENSG00000105996/ENSG00000163132/ENSG00000126778/ENSG00000179981/ENSG00000183691/ENSG00000143867	TBX1/SIX2/EYA1/PRRX1/NKX3-2/HOXA2/MSX1/SIX1/TSHZ1/NOG/OSR1	11
BP	GO:0043586	tongue development	11|2417	20|14725	8.97536e-05	0.00547919	ENSG00000184058/ENSG00000138795/ENSG00000173068/ENSG00000164107/ENSG00000157404/ENSG00000003137/ENSG00000126778/ENSG00000196591/ENSG00000146648/ENSG00000169884/ENSG00000116478	TBX1/LEF1/BNC2/HAND2/KIT/CYP26B1/SIX1/HDAC2/EGFR/WNT10B/HDAC1	11
BP	GO:0048644	muscle organ morphogenesis	25|2417	71|14725	9.06537e-05	0.00547919	ENSG00000162738/ENSG00000184058/ENSG00000152192/ENSG00000114251/ENSG00000183072/ENSG00000069702/ENSG00000016082/ENSG00000169946/ENSG00000054598/ENSG00000117707/ENSG00000113196/ENSG00000009709/ENSG00000173706/ENSG00000164093/ENSG00000168779/ENSG00000155657/ENSG00000170989/ENSG00000164532/ENSG00000176692/ENSG00000135766/ENSG00000242689/ENSG00000183691/ENSG00000065534/ENSG00000049883/ENSG00000125686	VANGL2/TBX1/POU4F1/WNT5A/NKX2-5/TGFBR3/ISL1/ZFPM2/FOXC1/PROX1/HAND1/PAX7/HEG1/PITX2/SHOX2/TTN/S1PR1/TBX20/FOXC2/EGLN1/CNTF/NOG/MYLK/PTCD2/MED1	25
BP	GO:0007519	skeletal muscle tissue development	43|2417	149|14725	9.38052e-05	0.00560935	ENSG00000233276/ENSG00000184058/ENSG00000128602/ENSG00000128573/ENSG00000112276/ENSG00000136630/ENSG00000128710/ENSG00000179456/ENSG00000122691/ENSG00000005513/ENSG00000128709/ENSG00000148704/ENSG00000198947/ENSG00000009709/ENSG00000081189/ENSG00000164093/ENSG00000142700/ENSG00000168779/ENSG00000154928/ENSG00000170162/ENSG00000178860/ENSG00000036448/ENSG00000239474/ENSG00000095587/ENSG00000064309…	GPX1/TBX1/SMO/FOXP2/BVES/HLX/HOXD10/ZBTB18/TWIST1/SOX8/HOXD9/VAX1/DMD/PAX7/MEF2C/PITX2/DMRTA2/SHOX2/EPHB1/VGLL2/MSC/MYOM2/KLHL41/TLL2/CDON/MYH15/COL19A1/HEYL/HDAC9/CYP26B1/ACTA1/SIX1/MEGF10/CFL2/MSTN/MYOD1/HLF/KCNAB1/WNT10B/ATF3/DDX17/WNT3A/ZNF689	43
BP	GO:0035115	embryonic forelimb morphogenesis	14|2417	30|14725	0.000104786	0.00620004	ENSG00000005073/ENSG00000128918/ENSG00000052850/ENSG00000122691/ENSG00000163064/ENSG00000128709/ENSG00000168779/ENSG00000122707/ENSG00000163132/ENSG00000103494/ENSG00000143867/ENSG00000151067/ENSG00000121039/ENSG00000135111	HOXA11/ALDH1A2/ALX4/TWIST1/EN1/HOXD9/SHOX2/RECK/MSX1/RPGRIP1L/OSR1/CACNA1C/RDH10/TBX3	14
BP	GO:0072006	nephron development	37|2417	123|14725	0.000110613	0.00642891	ENSG00000147257/ENSG00000162738/ENSG00000116962/ENSG00000128602/ENSG00000005073/ENSG00000125931/ENSG00000103449/ENSG00000128713/ENSG00000170577/ENSG00000138685/ENSG00000119630/ENSG00000166341/ENSG00000198914/ENSG00000005513/ENSG00000184937/ENSG00000163884/ENSG00000185920/ENSG00000054598/ENSG00000081189/ENSG00000104313/ENSG00000138193/ENSG00000126562/ENSG00000075891/ENSG00000146021/ENSG00000154188…	GPC3/VANGL2/NID1/SMO/HOXA11/CITED1/SALL1/HOXD11/SIX2/FGF2/PGF/DCHS1/POU3F3/SOX8/WT1/KLF15/PTCH1/FOXC1/MEF2C/EYA1/PLCE1/WNK4/PAX2/KLHL3/ANGPT1/HEYL/FAT4/SIX1/FOXC2/PDGFRA/PTPRO/CD34/NOG/PDGFRB/SULF1/OSR1/NUP93	37
BP	GO:0055001	muscle cell development	43|2417	150|14725	0.000110942	0.00642891	ENSG00000154277/ENSG00000233276/ENSG00000128591/ENSG00000145362/ENSG00000128602/ENSG00000112276/ENSG00000183072/ENSG00000138795/ENSG00000162614/ENSG00000183023/ENSG00000077522/ENSG00000117707/ENSG00000198947/ENSG00000109063/ENSG00000081189/ENSG00000154639/ENSG00000164093/ENSG00000168779/ENSG00000133026/ENSG00000131477/ENSG00000155657/ENSG00000036448/ENSG00000154556/ENSG00000239474/ENSG00000149269…	UCHL1/GPX1/FLNC/ANK2/SMO/BVES/NKX2-5/LEF1/NEXN/SLC8A1/ACTN2/PROX1/DMD/MYH3/MEF2C/CXADR/PITX2/SHOX2/MYH10/RAMP2/TTN/MYOM2/SORBS2/KLHL41/PAK1/HDAC9/CAV3/ACTA1/MEGF10/LMOD1/PDGFRA/CFL2/MYOD1/HNRNPU/WNT10B/FHOD3/PDGFRB/DDX39B/CACNA2D2/PTCD2/AKAP6/SGCB/TBX3	43
BP	GO:0001756	somitogenesis	21|2417	56|14725	0.000116441	0.00667872	ENSG00000114251/ENSG00000165556/ENSG00000138795/ENSG00000169554/ENSG00000103241/ENSG00000054598/ENSG00000090932/ENSG00000171956/ENSG00000140807/ENSG00000104332/ENSG00000125813/ENSG00000149311/ENSG00000076356/ENSG00000203877/ENSG00000169071/ENSG00000176692/ENSG00000253729/ENSG00000164458/ENSG00000154342/ENSG00000101752/ENSG00000005102	WNT5A/CDX2/LEF1/ZEB2/FOXF1/FOXC1/DLL3/FOXB1/NKD1/SFRP1/PAX1/ATM/PLXNA2/RIPPLY2/ROR2/FOXC2/PRKDC/TBXT/WNT3A/MIB1/MEOX1	21
BP	GO:0016202	regulation of striated muscle tissue development	36|2417	119|14725	0.000119842	0.00674152	ENSG00000152661/ENSG00000184058/ENSG00000183072/ENSG00000069702/ENSG00000138795/ENSG00000122691/ENSG00000138685/ENSG00000169946/ENSG00000110693/ENSG00000081189/ENSG00000168779/ENSG00000154928/ENSG00000164532/ENSG00000239474/ENSG00000149269/ENSG00000095587/ENSG00000064309/ENSG00000078900/ENSG00000143995/ENSG00000048052/ENSG00000003137/ENSG00000182533/ENSG00000126778/ENSG00000145794/ENSG00000117724…	GJA1/TBX1/NKX2-5/TGFBR3/LEF1/TWIST1/FGF2/ZFPM2/SOX6/MEF2C/SHOX2/EPHB1/TBX20/KLHL41/PAK1/TLL2/CDON/TP73/MEIS1/HDAC9/CYP26B1/CAV3/SIX1/MEGF10/CENPF/MSTN/MYOD1/NOG/FGF9/GLI1/WNT10B/DDX17/DDX39B/SAV1/WNT3A/AKAP6	36
BP	GO:0021536	diencephalon development	23|2417	64|14725	0.000119934	0.00674152	ENSG00000128602/ENSG00000074047/ENSG00000184486/ENSG00000128918/ENSG00000152192/ENSG00000114251/ENSG00000103449/ENSG00000016082/ENSG00000138795/ENSG00000169554/ENSG00000007372/ENSG00000205927/ENSG00000171956/ENSG00000075213/ENSG00000164093/ENSG00000129159/ENSG00000134954/ENSG00000136352/ENSG00000163132/ENSG00000138083/ENSG00000183691/ENSG00000111087/ENSG00000143178	SMO/GLI2/POU3F2/ALDH1A2/POU4F1/WNT5A/SALL1/ISL1/LEF1/ZEB2/PAX6/OLIG2/FOXB1/SEMA3A/PITX2/KCNC1/ETS1/NKX2-1/MSX1/SIX3/NOG/GLI1/TBX19	23
BP	GO:0055002	striated muscle cell development	40|2417	137|14725	0.000122873	0.00683832	ENSG00000154277/ENSG00000233276/ENSG00000128591/ENSG00000128602/ENSG00000112276/ENSG00000183072/ENSG00000138795/ENSG00000162614/ENSG00000183023/ENSG00000077522/ENSG00000117707/ENSG00000198947/ENSG00000109063/ENSG00000081189/ENSG00000154639/ENSG00000164093/ENSG00000168779/ENSG00000133026/ENSG00000155657/ENSG00000036448/ENSG00000154556/ENSG00000239474/ENSG00000149269/ENSG00000048052/ENSG00000182533…	UCHL1/GPX1/FLNC/SMO/BVES/NKX2-5/LEF1/NEXN/SLC8A1/ACTN2/PROX1/DMD/MYH3/MEF2C/CXADR/PITX2/SHOX2/MYH10/TTN/MYOM2/SORBS2/KLHL41/PAK1/HDAC9/CAV3/ACTA1/LMOD1/PDGFRA/CFL2/MYOD1/HNRNPU/WNT10B/FHOD3/PDGFRB/DDX39B/CACNA2D2/PTCD2/AKAP6/SGCB/TBX3	40
BP	GO:0048546	digestive tract morphogenesis	18|2417	45|14725	0.000135401	0.00746164	ENSG00000162738/ENSG00000074047/ENSG00000128714/ENSG00000136630/ENSG00000114251/ENSG00000170577/ENSG00000103241/ENSG00000081059/ENSG00000165617/ENSG00000164093/ENSG00000104332/ENSG00000168779/ENSG00000138686/ENSG00000134853/ENSG00000114739/ENSG00000111087/ENSG00000146648/ENSG00000166831	VANGL2/GLI2/HOXD13/HLX/WNT5A/SIX2/FOXF1/TCF7/DACT1/PITX2/SFRP1/SHOX2/BBS7/PDGFRA/ACVR2B/GLI1/EGFR/RBPMS2	18
BP	GO:0001945	lymph vessel development	12|2417	24|14725	0.000143822	0.00777328	ENSG00000184058/ENSG00000162493/ENSG00000037280/ENSG00000054598/ENSG00000117707/ENSG00000173706/ENSG00000183287/ENSG00000152104/ENSG00000176692/ENSG00000114739/ENSG00000071246/ENSG00000119608	TBX1/PDPN/FLT4/FOXC1/PROX1/HEG1/CCBE1/PTPN14/FOXC2/ACVR2B/VASH1/PROX2	12
BP	GO:0060343	trabecula formation	12|2417	24|14725	0.000143822	0.00777328	ENSG00000164683/ENSG00000138829/ENSG00000154734/ENSG00000183072/ENSG00000069702/ENSG00000138449/ENSG00000104332/ENSG00000087245/ENSG00000182533/ENSG00000155846/ENSG00000135766/ENSG00000169884	HEY1/FBN2/ADAMTS1/NKX2-5/TGFBR3/SLC40A1/SFRP1/MMP2/CAV3/PPARGC1B/EGLN1/WNT10B	12
BP	GO:0045665	negative regulation of neuron differentiation	51|2417	189|14725	0.000148428	0.00794584	ENSG00000114251/ENSG00000016082/ENSG00000072832/ENSG00000175745/ENSG00000007372/ENSG00000176165/ENSG00000119866/ENSG00000169760/ENSG00000145147/ENSG00000205927/ENSG00000005513/ENSG00000198597/ENSG00000198121/ENSG00000108576/ENSG00000198947/ENSG00000135333/ENSG00000138136/ENSG00000075213/ENSG00000188729/ENSG00000133104/ENSG00000115844/ENSG00000136160/ENSG00000197959/ENSG00000010319/ENSG00000134569…	WNT5A/ISL1/CRMP1/NR2F1/PAX6/FOXG1/BCL11A/NLGN1/SLIT2/OLIG2/SOX8/ZNF536/LPAR1/SLC6A4/DMD/EPHA7/LBX1/SEMA3A/OSTN/SPART/DLX2/EDNRB/DNM3/SEMA3G/LRP4/NKX2-2/NR2E1/NLGN3/HOXA2/TP73/FUOM/RGMA/MEIS1/PAQR3/GFI1/LRRK2/ISL2/HDAC2/PTPRO/CNTF/ASPM/DIXDC1/SIX3/RUFY3/THOC2/ID4/MED1/WNT3A/MIB1/CTSZ/DENND5A	51
BP	GO:0072089	stem cell proliferation	33|2417	107|14725	0.000150781	0.00799566	ENSG00000149948/ENSG00000128602/ENSG00000019549/ENSG00000114251/ENSG00000138795/ENSG00000077942/ENSG00000007372/ENSG00000176165/ENSG00000170577/ENSG00000138685/ENSG00000148704/ENSG00000134532/ENSG00000085563/ENSG00000142700/ENSG00000112333/ENSG00000206557/ENSG00000207870/ENSG00000126070/ENSG00000188906/ENSG00000116641/ENSG00000162946/ENSG00000141384/ENSG00000101882/ENSG00000174059/ENSG00000066279…	HMGA2/SMO/SNAI2/WNT5A/LEF1/FBLN1/PAX6/FOXG1/SIX2/FGF2/VAX1/SOX5/ABCB1/DMRTA2/NR2E1/TRIM71/MIR221/AGO3/LRRK2/DOCK7/DISC1/TAF4B/NKAP/CD34/ASPM/SIX3/HNRNPU/WNT10B/ID4/WNT3A/FZD3/ARIH2/TBX3	33
BP	GO:0021516	dorsal spinal cord development	10|2417	18|14725	0.000169926	0.00881977	ENSG00000143869/ENSG00000146122/ENSG00000120068/ENSG00000117707/ENSG00000138136/ENSG00000009709/ENSG00000162367/ENSG00000164853/ENSG00000112139/ENSG00000154342	GDF7/DAAM2/HOXB8/PROX1/LBX1/PAX7/TAL1/UNCX/MDGA1/WNT3A	10
BP	GO:0036303	lymph vessel morphogenesis	10|2417	18|14725	0.000169926	0.00881977	ENSG00000162493/ENSG00000037280/ENSG00000054598/ENSG00000117707/ENSG00000183287/ENSG00000152104/ENSG00000176692/ENSG00000114739/ENSG00000071246/ENSG00000119608	PDPN/FLT4/FOXC1/PROX1/CCBE1/PTPN14/FOXC2/ACVR2B/VASH1/PROX2	10
BP	GO:0048634	regulation of muscle organ development	36|2417	121|14725	0.000173738	0.00881977	ENSG00000152661/ENSG00000184058/ENSG00000183072/ENSG00000069702/ENSG00000138795/ENSG00000122691/ENSG00000138685/ENSG00000169946/ENSG00000110693/ENSG00000081189/ENSG00000168779/ENSG00000154928/ENSG00000164532/ENSG00000239474/ENSG00000149269/ENSG00000095587/ENSG00000064309/ENSG00000078900/ENSG00000143995/ENSG00000048052/ENSG00000003137/ENSG00000182533/ENSG00000126778/ENSG00000145794/ENSG00000117724…	GJA1/TBX1/NKX2-5/TGFBR3/LEF1/TWIST1/FGF2/ZFPM2/SOX6/MEF2C/SHOX2/EPHB1/TBX20/KLHL41/PAK1/TLL2/CDON/TP73/MEIS1/HDAC9/CYP26B1/CAV3/SIX1/MEGF10/CENPF/MSTN/MYOD1/NOG/FGF9/GLI1/WNT10B/DDX17/DDX39B/SAV1/WNT3A/AKAP6	36
BP	GO:1901861	regulation of muscle tissue development	36|2417	121|14725	0.000173738	0.00881977	ENSG00000152661/ENSG00000184058/ENSG00000183072/ENSG00000069702/ENSG00000138795/ENSG00000122691/ENSG00000138685/ENSG00000169946/ENSG00000110693/ENSG00000081189/ENSG00000168779/ENSG00000154928/ENSG00000164532/ENSG00000239474/ENSG00000149269/ENSG00000095587/ENSG00000064309/ENSG00000078900/ENSG00000143995/ENSG00000048052/ENSG00000003137/ENSG00000182533/ENSG00000126778/ENSG00000145794/ENSG00000117724…	GJA1/TBX1/NKX2-5/TGFBR3/LEF1/TWIST1/FGF2/ZFPM2/SOX6/MEF2C/SHOX2/EPHB1/TBX20/KLHL41/PAK1/TLL2/CDON/TP73/MEIS1/HDAC9/CYP26B1/CAV3/SIX1/MEGF10/CENPF/MSTN/MYOD1/NOG/FGF9/GLI1/WNT10B/DDX17/DDX39B/SAV1/WNT3A/AKAP6	36
BP	GO:0021517	ventral spinal cord development	17|2417	42|14725	0.000174167	0.00881977	ENSG00000074047/ENSG00000128710/ENSG00000016082/ENSG00000007372/ENSG00000163623/ENSG00000126970/ENSG00000180818/ENSG00000205927/ENSG00000185920/ENSG00000138136/ENSG00000187240/ENSG00000164532/ENSG00000125820/ENSG00000164900/ENSG00000139445/ENSG00000159556/ENSG00000064218	GLI2/HOXD10/ISL1/PAX6/NKX6-1/ZC4H2/HOXC10/OLIG2/PTCH1/LBX1/DYNC2H1/TBX20/NKX2-2/GBX1/FOXN4/ISL2/DMRT3	17
BP	GO:0060562	epithelial tube morphogenesis	74|2417	303|14725	0.000194901	0.00978162	ENSG00000152661/ENSG00000147257/ENSG00000162738/ENSG00000128602/ENSG00000106004/ENSG00000074047/ENSG00000143869/ENSG00000005073/ENSG00000125931/ENSG00000114251/ENSG00000183072/ENSG00000103449/ENSG00000187498/ENSG00000128713/ENSG00000138795/ENSG00000169554/ENSG00000122691/ENSG00000170577/ENSG00000138685/ENSG00000103241/ENSG00000145147/ENSG00000119630/ENSG00000166341/ENSG00000005513/ENSG00000184937…	GJA1/GPC3/VANGL2/SMO/HOXA5/GLI2/GDF7/HOXA11/CITED1/WNT5A/NKX2-5/SALL1/COL4A1/HOXD11/LEF1/ZEB2/TWIST1/SIX2/FGF2/FOXF1/SLIT2/PGF/DCHS1/SOX8/WT1/ALX1/PTCH1/PROX1/HAND1/HAND2/EPHA7/LBX1/CECR2/MEF2C/PITX2/EYA1/WNK4/SFRP1/PAX2/LGR5/KLHL3/BBS7/APAF1/TBX20/PAK1/TRIM71/NKX2-1/SOSTDC1/FAT4/RGMA/GLMN/FOXN4/CAV3/CEP290/SIX1/FOXC2/SPRY2/ZIC3/KIF3A/TNC/NOG/TBXT/OSR1/PRKACB/EDNRA/MED1/WNT3A/MIB1/RDH10/FZD3/CCDC…	74
BP	GO:0086019	cell-cell signaling involved in cardiac conduction	13|2417	28|14725	0.000197326	0.00979498	ENSG00000152661/ENSG00000145362/ENSG00000182963/ENSG00000183873/ENSG00000153956/ENSG00000154639/ENSG00000177098/ENSG00000166257/ENSG00000108961/ENSG00000165995/ENSG00000113569/ENSG00000151067/ENSG00000053918	GJA1/ANK2/GJC1/SCN5A/CACNA2D1/CXADR/SCN4B/SCN3B/RANGRF/CACNB2/NUP155/CACNA1C/KCNQ1	13
BP	GO:0086065	cell communication involved in cardiac conduction	19|2417	50|14725	0.000198653	0.00979498	ENSG00000152661/ENSG00000145362/ENSG00000182963/ENSG00000183873/ENSG00000153956/ENSG00000183023/ENSG00000154639/ENSG00000129244/ENSG00000177098/ENSG00000166257/ENSG00000108961/ENSG00000165995/ENSG00000119782/ENSG00000046604/ENSG00000134755/ENSG00000113569/ENSG00000075142/ENSG00000151067/ENSG00000053918	GJA1/ANK2/GJC1/SCN5A/CACNA2D1/SLC8A1/CXADR/ATP1B2/SCN4B/SCN3B/RANGRF/CACNB2/FKBP1B/DSG2/DSC2/NUP155/SRI/CACNA1C/KCNQ1	19
BP	GO:0048754	branching morphogenesis of an epithelial tube	40|2417	140|14725	0.000204459	0.00992751	ENSG00000147257/ENSG00000162738/ENSG00000128602/ENSG00000106004/ENSG00000074047/ENSG00000143869/ENSG00000005073/ENSG00000125931/ENSG00000114251/ENSG00000103449/ENSG00000187498/ENSG00000128713/ENSG00000138795/ENSG00000170577/ENSG00000138685/ENSG00000103241/ENSG00000145147/ENSG00000119630/ENSG00000166341/ENSG00000005513/ENSG00000184937/ENSG00000185920/ENSG00000164093/ENSG00000104313/ENSG00000075891…	GPC3/VANGL2/SMO/HOXA5/GLI2/GDF7/HOXA11/CITED1/WNT5A/SALL1/COL4A1/HOXD11/LEF1/SIX2/FGF2/FOXF1/SLIT2/PGF/DCHS1/SOX8/WT1/PTCH1/PITX2/EYA1/PAX2/TBX20/PAK1/NKX2-1/FAT4/CAV3/SIX1/FOXC2/SPRY2/TNC/NOG/EDNRA/MED1/RDH10/CTSZ/TBX3	40
BP	GO:0003007	heart morphogenesis	57|2417	220|14725	0.000204873	0.00992751	ENSG00000152661/ENSG00000164683/ENSG00000162738/ENSG00000154734/ENSG00000184058/ENSG00000128602/ENSG00000128918/ENSG00000019549/ENSG00000152192/ENSG00000114251/ENSG00000183072/ENSG00000069702/ENSG00000016082/ENSG00000077092/ENSG00000122691/ENSG00000103241/ENSG00000166341/ENSG00000169946/ENSG00000185920/ENSG00000054598/ENSG00000117707/ENSG00000113196/ENSG00000164107/ENSG00000138136/ENSG00000081189…	GJA1/HEY1/VANGL2/ADAMTS1/TBX1/SMO/ALDH1A2/SNAI2/POU4F1/WNT5A/NKX2-5/TGFBR3/ISL1/RARB/TWIST1/FOXF1/DCHS1/ZFPM2/PTCH1/FOXC1/PROX1/HAND1/HAND2/LBX1/MEF2C/HEG1/PITX2/EYA1/SHOX2/NRP2/BBS7/COL2A1/TTN/TMEM100/S1PR1/TBX20/MSX1/HEYL/FAT4/HAS2/FOXN4/CAV3/SIX1/FOXC2/ZIC3/EGLN1/KIF3A/NOG/SAV1/TBXT/PTCD2/MED1/WNT3A/MIB1/CCDC39/JUN/TBX3	57
BP	GO:0042733	embryonic digit morphogenesis	22|2417	62|14725	0.000206899	0.00994001	ENSG00000152661/ENSG00000074047/ENSG00000005073/ENSG00000128714/ENSG00000052850/ENSG00000114251/ENSG00000103449/ENSG00000122691/ENSG00000164066/ENSG00000164107/ENSG00000146350/ENSG00000134569/ENSG00000163132/ENSG00000169071/ENSG00000162769/ENSG00000196591/ENSG00000109906/ENSG00000183691/ENSG00000204104/ENSG00000116478/ENSG00000143867/ENSG00000135111	GJA1/GLI2/HOXA11/HOXD13/ALX4/WNT5A/SALL1/TWIST1/INTU/HAND2/TBC1D32/LRP4/MSX1/ROR2/FLVCR1/HDAC2/ZBTB16/NOG/TRAF3IP1/HDAC1/OSR1/TBX3	22
BP	GO:0007610	behavior	111|2417	493|14725	0.000214636	0.0102243	ENSG00000165300/ENSG00000154277/ENSG00000152661/ENSG00000079215/ENSG00000184058/ENSG00000169860/ENSG00000118971/ENSG00000128573/ENSG00000152192/ENSG00000120068/ENSG00000150471/ENSG00000055732/ENSG00000128710/ENSG00000010810/ENSG00000087258/ENSG00000116678/ENSG00000152495/ENSG00000145335/ENSG00000105991/ENSG00000114200/ENSG00000139910/ENSG00000148408/ENSG00000169760/ENSG00000135298/ENSG00000046889…	SLITRK5/UCHL1/GJA1/SLC1A3/TBX1/P2RY1/CCND2/FOXP2/POU4F1/HOXB8/ADGRL3/MCOLN3/HOXD10/FYN/GNAO1/LEPR/CAMK4/SNCA/HOXA1/BCHE/NOVA1/CACNA1B/NLGN1/ADGRB3/PREX2/EN1/NPTX2/HOXD9/CDH23/SERPINF1/FOXB1/SLC6A4/HAND2/DACH1/MEF2C/KIT/ITGA8/APBA2/CUX2/NPHP1/OPRD1/ETV1/MRAP2/NRGN/BHLHB9/SERPINE2/SOBP/NRXN2/TAL1/LHX8/DMBX1/GRID1/NR2E1/NKX2-1/THBS4/NLGN3/OTOG/TRPV1/GBX1/GAL/FUOM/CHRNA4/PITX3/APLN/PPARA/MEIS1/SELENO…	111
BP	GO:0042063	gliogenesis	61|2417	240|14725	0.000220983	0.0104382	ENSG00000170558/ENSG00000084207/ENSG00000169860/ENSG00000050555/ENSG00000128602/ENSG00000184486/ENSG00000181690/ENSG00000091136/ENSG00000146122/ENSG00000138795/ENSG00000185483/ENSG00000007372/ENSG00000176165/ENSG00000163623/ENSG00000205927/ENSG00000005513/ENSG00000198121/ENSG00000163884/ENSG00000110693/ENSG00000136717/ENSG00000198947/ENSG00000134198/ENSG00000075891/ENSG00000115844/ENSG00000124920…	CDH2/GSTP1/P2RY1/LAMC3/SMO/POU3F2/PLAG1/LAMB1/DAAM2/LEF1/ROR1/PAX6/FOXG1/NKX6-1/OLIG2/SOX8/LPAR1/KLF15/SOX6/BIN1/DMD/TSPAN2/PAX2/DLX2/MYRF/SERPINE2/TAL1/LAMA2/FGF5/NKX2-2/NR2E1/NKX2-1/GAP43/NLGN3/TP73/MIR221/EMX1/PITX3/ROR2/NAB1/GCM1/SLC8A3/OLIG1/WASF3/PTPRZ1/PRDM8/POU3F1/HDAC2/CSPG4/CNTF/NTRK2/NOG/CDKN2C/AFDN/EGFR/LYN/ID4/ZNF488/CNTNAP1/EIF2B3/SYNJ1	61
BP	GO:0003012	muscle system process	89|2417	380|14725	0.000223491	0.0104687	ENSG00000152661/ENSG00000169860/ENSG00000122786/ENSG00000145362/ENSG00000213949/ENSG00000182963/ENSG00000184185/ENSG00000181104/ENSG00000183072/ENSG00000183873/ENSG00000087258/ENSG00000153956/ENSG00000183023/ENSG00000081181/ENSG00000213366/ENSG00000163884/ENSG00000077522/ENSG00000108984/ENSG00000164107/ENSG00000198947/ENSG00000109063/ENSG00000081189/ENSG00000138193/ENSG00000116741/ENSG00000157404…	GJA1/P2RY1/CALD1/ANK2/ITGA1/GJC1/KCNJ12/F2R/NKX2-5/SCN5A/GNAO1/CACNA2D1/SLC8A1/ARG2/GSTM2/KLF15/ACTN2/MAP2K6/HAND2/DMD/MYH3/MEF2C/PLCE1/RGS2/KIT/SPX/KCNB2/EDNRB/PARP1/TRPC3/TTN/SCN4B/TBX20/MYOM2/SORBS2/KLHL41/UTRN/PRKG1/SCN3B/CHRM3/GUCY1A1/DOCK4/PAK1/CALCRL/SSTR2/TRPV1/ADORA2B/SCN4A/MYOT/GRIP2/CACNB2/CAV3/SLC8A3/ACTA1/SCN2B/HMOX1/FKBP1B/LMOD1/DSG2/DSC2/FOXO1/PTGS2/HDAC2/SORBS1/MSTN/NMUR1/PDE9A/MY…	89
BP	GO:0001823	mesonephros development	30|2417	96|14725	0.000228434	0.0106118	ENSG00000147257/ENSG00000128602/ENSG00000005073/ENSG00000125931/ENSG00000103449/ENSG00000077092/ENSG00000128713/ENSG00000185008/ENSG00000170577/ENSG00000138685/ENSG00000081181/ENSG00000145147/ENSG00000119630/ENSG00000166341/ENSG00000005513/ENSG00000184937/ENSG00000185920/ENSG00000054598/ENSG00000104313/ENSG00000104332/ENSG00000075891/ENSG00000120693/ENSG00000196159/ENSG00000164619/ENSG00000126778…	GPC3/SMO/HOXA11/CITED1/SALL1/RARB/HOXD11/ROBO2/SIX2/FGF2/ARG2/SLIT2/PGF/DCHS1/SOX8/WT1/PTCH1/FOXC1/EYA1/SFRP1/PAX2/SMAD9/FAT4/BMPER/SIX1/FOXC2/ZBTB16/SIM1/NOG/OSR1	30
BP	GO:0001657	ureteric bud development	29|2417	92|14725	0.000244472	0.0112637	ENSG00000147257/ENSG00000128602/ENSG00000005073/ENSG00000125931/ENSG00000103449/ENSG00000077092/ENSG00000128713/ENSG00000185008/ENSG00000170577/ENSG00000138685/ENSG00000081181/ENSG00000145147/ENSG00000119630/ENSG00000166341/ENSG00000005513/ENSG00000184937/ENSG00000185920/ENSG00000054598/ENSG00000104313/ENSG00000104332/ENSG00000075891/ENSG00000120693/ENSG00000196159/ENSG00000164619/ENSG00000126778…	GPC3/SMO/HOXA11/CITED1/SALL1/RARB/HOXD11/ROBO2/SIX2/FGF2/ARG2/SLIT2/PGF/DCHS1/SOX8/WT1/PTCH1/FOXC1/EYA1/SFRP1/PAX2/SMAD9/FAT4/BMPER/SIX1/FOXC2/SIM1/NOG/OSR1	29
BP	GO:0051963	regulation of synapse assembly	24|2417	71|14725	0.000254818	0.0115511	ENSG00000165300/ENSG00000114251/ENSG00000150471/ENSG00000131409/ENSG00000185008/ENSG00000145335/ENSG00000169760/ENSG00000135298/ENSG00000121871/ENSG00000153707/ENSG00000135333/ENSG00000081189/ENSG00000111249/ENSG00000154928/ENSG00000198908/ENSG00000196338/ENSG00000125848/ENSG00000206561/ENSG00000126778/ENSG00000152208/ENSG00000102924/ENSG00000148053/ENSG00000196083/ENSG00000198400	SLITRK5/WNT5A/ADGRL3/LRRC4B/ROBO2/SNCA/NLGN1/ADGRB3/SLITRK3/PTPRD/EPHA7/MEF2C/CUX2/EPHB1/BHLHB9/NLGN3/FLRT3/COLQ/SIX1/GRID2/CBLN1/NTRK2/IL1RAP/NTRK1	24
BP	GO:0061333	renal tubule morphogenesis	24|2417	71|14725	0.000254818	0.0115511	ENSG00000147257/ENSG00000128602/ENSG00000005073/ENSG00000125931/ENSG00000103449/ENSG00000187498/ENSG00000128713/ENSG00000170577/ENSG00000138685/ENSG00000119630/ENSG00000166341/ENSG00000005513/ENSG00000184937/ENSG00000185920/ENSG00000081189/ENSG00000104313/ENSG00000126562/ENSG00000075891/ENSG00000139292/ENSG00000146021/ENSG00000196159/ENSG00000126778/ENSG00000183691/ENSG00000143867	GPC3/SMO/HOXA11/CITED1/SALL1/COL4A1/HOXD11/SIX2/FGF2/PGF/DCHS1/SOX8/WT1/PTCH1/MEF2C/EYA1/WNK4/PAX2/LGR5/KLHL3/FAT4/SIX1/NOG/OSR1	24
BP	GO:0072132	mesenchyme morphogenesis	18|2417	47|14725	0.000259204	0.0116559	ENSG00000164683/ENSG00000019549/ENSG00000114251/ENSG00000016082/ENSG00000138795/ENSG00000122691/ENSG00000103241/ENSG00000166341/ENSG00000054598/ENSG00000166292/ENSG00000164532/ENSG00000163132/ENSG00000163909/ENSG00000143632/ENSG00000176692/ENSG00000183691/ENSG00000143867/ENSG00000154342	HEY1/SNAI2/WNT5A/ISL1/LEF1/TWIST1/FOXF1/DCHS1/FOXC1/TMEM100/TBX20/MSX1/HEYL/ACTA1/FOXC2/NOG/OSR1/WNT3A	18
BP	GO:0050808	synapse organization	66|2417	266|14725	0.000262466	0.0117089	ENSG00000165300/ENSG00000170558/ENSG00000152192/ENSG00000114251/ENSG00000150471/ENSG00000181104/ENSG00000187498/ENSG00000010810/ENSG00000131409/ENSG00000185008/ENSG00000145335/ENSG00000182389/ENSG00000169760/ENSG00000135298/ENSG00000126970/ENSG00000121871/ENSG00000144868/ENSG00000153707/ENSG00000188153/ENSG00000198689/ENSG00000135333/ENSG00000081189/ENSG00000111249/ENSG00000154928/ENSG00000176204…	SLITRK5/CDH2/POU4F1/WNT5A/ADGRL3/F2R/COL4A1/FYN/LRRC4B/ROBO2/SNCA/CACNB4/NLGN1/ADGRB3/ZC4H2/SLITRK3/TMEM108/PTPRD/COL4A5/SLC9A6/EPHA7/MEF2C/CUX2/EPHB1/LRRTM4/BHLHB9/MYH10/NRXN2/DNM3/GPM6A/DRP2/LRP4/UTRN/NLGN3/ZNF804A/PCLO/PAK3/FLRT3/NFASC/CACNB2/SDK2/NRXN3/CAPRIN2/GNPAT/LRRK2/COLQ/SIX1/GRID2/CBLN1/SPOCK2/SNCB/IL10RA/CHRNA7/CAMK1/TNC/NTRK2/MTMR2/SYBU/IL1RAP/PCDHGC4/NTRK1/SHANK1/CACNA2D2/RAPSN/WNT3…	66
BP	GO:0071230	cellular response to amino acid stimulus	21|2417	59|14725	0.000272604	0.0119224	ENSG00000148516/ENSG00000197565/ENSG00000162909/ENSG00000187498/ENSG00000010810/ENSG00000149212/ENSG00000119866/ENSG00000204262/ENSG00000087245/ENSG00000142156/ENSG00000126778/ENSG00000065150/ENSG00000134853/ENSG00000177058/ENSG00000145431/ENSG00000025039/ENSG00000148053/ENSG00000023909/ENSG00000146648/ENSG00000138668/ENSG00000133706	ZEB1/COL4A6/CAPN2/COL4A1/FYN/SESN3/BCL11A/COL5A2/MMP2/COL6A1/SIX1/IPO5/PDGFRA/SLC38A9/PDGFC/RRAGD/NTRK2/GCLM/EGFR/HNRNPD/LARS	21
BP	GO:0086012	membrane depolarization during cardiac muscle cell action potential	11|2417	22|14725	0.000273615	0.0119224	ENSG00000145362/ENSG00000183873/ENSG00000153956/ENSG00000183023/ENSG00000177098/ENSG00000166257/ENSG00000108961/ENSG00000165995/ENSG00000182533/ENSG00000149575/ENSG00000151067	ANK2/SCN5A/CACNA2D1/SLC8A1/SCN4B/SCN3B/RANGRF/CACNB2/CAV3/SCN2B/CACNA1C	11
BP	GO:0090103	cochlea morphogenesis	11|2417	22|14725	0.000273615	0.0119224	ENSG00000162738/ENSG00000184058/ENSG00000148516/ENSG00000074047/ENSG00000114251/ENSG00000105991/ENSG00000095777/ENSG00000104313/ENSG00000075891/ENSG00000126778/ENSG00000165409	VANGL2/TBX1/ZEB1/GLI2/WNT5A/HOXA1/MYO3A/EYA1/PAX2/SIX1/TSHR	11
BP	GO:0021983	pituitary gland development	15|2417	36|14725	0.000285127	0.0123285	ENSG00000074047/ENSG00000184486/ENSG00000128918/ENSG00000114251/ENSG00000103449/ENSG00000016082/ENSG00000007372/ENSG00000164093/ENSG00000134954/ENSG00000136352/ENSG00000163132/ENSG00000138083/ENSG00000183691/ENSG00000111087/ENSG00000143178	GLI2/POU3F2/ALDH1A2/WNT5A/SALL1/ISL1/PAX6/PITX2/ETS1/NKX2-1/MSX1/SIX3/NOG/GLI1/TBX19	15
BP	GO:0051961	negative regulation of nervous system development	64|2417	257|14725	0.000289779	0.0124339	ENSG00000146122/ENSG00000114251/ENSG00000016082/ENSG00000072832/ENSG00000175745/ENSG00000185008/ENSG00000143147/ENSG00000007372/ENSG00000176165/ENSG00000119866/ENSG00000163623/ENSG00000169760/ENSG00000145147/ENSG00000205927/ENSG00000005513/ENSG00000198597/ENSG00000198121/ENSG00000090932/ENSG00000148704/ENSG00000108576/ENSG00000198947/ENSG00000135333/ENSG00000138136/ENSG00000075213/ENSG00000188729…	DAAM2/WNT5A/ISL1/CRMP1/NR2F1/ROBO2/GPR161/PAX6/FOXG1/BCL11A/NKX6-1/NLGN1/SLIT2/OLIG2/SOX8/ZNF536/LPAR1/DLL3/VAX1/SLC6A4/DMD/EPHA7/LBX1/SEMA3A/OSTN/SPART/DLX2/EDNRB/DNM3/SEMA3G/LRP4/NKX2-2/NR2E1/NLGN3/HOXA2/TP73/FUOM/RGMA/PITX3/MEIS1/PAQR3/GFI1/LRRK2/ISL2/HDAC2/PTPRO/CNTF/MTMR2/ASPM/DIXDC1/HOOK3/SIX3/NOG/RUFY3/TRAF3IP1/THOC2/PRKACB/ID4/MED1/WNT3A/NEUROD2/MIB1/CTSZ/DENND5A	64
BP	GO:0072163	mesonephric epithelium development	29|2417	93|14725	0.000300322	0.0126926	ENSG00000147257/ENSG00000128602/ENSG00000005073/ENSG00000125931/ENSG00000103449/ENSG00000077092/ENSG00000128713/ENSG00000185008/ENSG00000170577/ENSG00000138685/ENSG00000081181/ENSG00000145147/ENSG00000119630/ENSG00000166341/ENSG00000005513/ENSG00000184937/ENSG00000185920/ENSG00000054598/ENSG00000104313/ENSG00000104332/ENSG00000075891/ENSG00000120693/ENSG00000196159/ENSG00000164619/ENSG00000126778…	GPC3/SMO/HOXA11/CITED1/SALL1/RARB/HOXD11/ROBO2/SIX2/FGF2/ARG2/SLIT2/PGF/DCHS1/SOX8/WT1/PTCH1/FOXC1/EYA1/SFRP1/PAX2/SMAD9/FAT4/BMPER/SIX1/FOXC2/SIM1/NOG/OSR1	29
BP	GO:0072164	mesonephric tubule development	29|2417	93|14725	0.000300322	0.0126926	ENSG00000147257/ENSG00000128602/ENSG00000005073/ENSG00000125931/ENSG00000103449/ENSG00000077092/ENSG00000128713/ENSG00000185008/ENSG00000170577/ENSG00000138685/ENSG00000081181/ENSG00000145147/ENSG00000119630/ENSG00000166341/ENSG00000005513/ENSG00000184937/ENSG00000185920/ENSG00000054598/ENSG00000104313/ENSG00000104332/ENSG00000075891/ENSG00000120693/ENSG00000196159/ENSG00000164619/ENSG00000126778…	GPC3/SMO/HOXA11/CITED1/SALL1/RARB/HOXD11/ROBO2/SIX2/FGF2/ARG2/SLIT2/PGF/DCHS1/SOX8/WT1/PTCH1/FOXC1/EYA1/SFRP1/PAX2/SMAD9/FAT4/BMPER/SIX1/FOXC2/SIM1/NOG/OSR1	29
BP	GO:0007157	heterophilic cell-cell adhesion via plasma membrane cell adhesion molecules	16|2417	40|14725	0.000315939	0.0132529	ENSG00000170558/ENSG00000177707/ENSG00000244486/ENSG00000169760/ENSG00000166341/ENSG00000153707/ENSG00000154639/ENSG00000196159/ENSG00000152208/ENSG00000175161/ENSG00000102924/ENSG00000150637/ENSG00000009694/ENSG00000161638/ENSG00000182985/ENSG00000136732	CDH2/NECTIN3/SCARF2/NLGN1/DCHS1/PTPRD/CXADR/FAT4/GRID2/CADM2/CBLN1/CD226/TENM1/ITGA5/CADM1/GYPC	16
BP	GO:0072009	nephron epithelium development	30|2417	98|14725	0.000340517	0.0141781	ENSG00000147257/ENSG00000128602/ENSG00000005073/ENSG00000125931/ENSG00000103449/ENSG00000128713/ENSG00000170577/ENSG00000138685/ENSG00000119630/ENSG00000166341/ENSG00000198914/ENSG00000005513/ENSG00000184937/ENSG00000163884/ENSG00000185920/ENSG00000054598/ENSG00000081189/ENSG00000104313/ENSG00000126562/ENSG00000075891/ENSG00000146021/ENSG00000163909/ENSG00000196159/ENSG00000126778/ENSG00000176692…	GPC3/SMO/HOXA11/CITED1/SALL1/HOXD11/SIX2/FGF2/PGF/DCHS1/POU3F3/SOX8/WT1/KLF15/PTCH1/FOXC1/MEF2C/EYA1/WNK4/PAX2/KLHL3/HEYL/FAT4/SIX1/FOXC2/PTPRO/CD34/NOG/OSR1/NUP93	30
BP	GO:0055013	cardiac muscle cell development	21|2417	60|14725	0.000355279	0.014684	ENSG00000112276/ENSG00000183072/ENSG00000162614/ENSG00000183023/ENSG00000077522/ENSG00000117707/ENSG00000154639/ENSG00000164093/ENSG00000133026/ENSG00000155657/ENSG00000154556/ENSG00000149269/ENSG00000182533/ENSG00000134853/ENSG00000153187/ENSG00000134775/ENSG00000113721/ENSG00000198563/ENSG00000151320/ENSG00000163069/ENSG00000135111	BVES/NKX2-5/NEXN/SLC8A1/ACTN2/PROX1/CXADR/PITX2/MYH10/TTN/SORBS2/PAK1/CAV3/PDGFRA/HNRNPU/FHOD3/PDGFRB/DDX39B/AKAP6/SGCB/TBX3	21
BP	GO:0035137	hindlimb morphogenesis	14|2417	33|14725	0.000362126	0.0148577	ENSG00000147257/ENSG00000052850/ENSG00000128710/ENSG00000077092/ENSG00000122691/ENSG00000128709/ENSG00000185920/ENSG00000164093/ENSG00000163132/ENSG00000103494/ENSG00000109906/ENSG00000143867/ENSG00000125686/ENSG00000135111	GPC3/ALX4/HOXD10/RARB/TWIST1/HOXD9/PTCH1/PITX2/MSX1/RPGRIP1L/ZBTB16/OSR1/MED1/TBX3	14
BP	GO:0009798	axis specification	25|2417	77|14725	0.000387071	0.0157661	ENSG00000147257/ENSG00000116729/ENSG00000128602/ENSG00000125931/ENSG00000114251/ENSG00000165556/ENSG00000007372/ENSG00000170577/ENSG00000184937/ENSG00000185920/ENSG00000164093/ENSG00000104332/ENSG00000134569/ENSG00000203877/ENSG00000165588/ENSG00000197121/ENSG00000138587/ENSG00000183337/ENSG00000081870/ENSG00000138083/ENSG00000175879/ENSG00000164458/ENSG00000158683/ENSG00000121481/ENSG00000135111	GPC3/WLS/SMO/CITED1/WNT5A/CDX2/PAX6/SIX2/WT1/PTCH1/PITX2/SFRP1/LRP4/RIPPLY2/OTX2/PGAP1/MNS1/BCOR/HSPB11/SIX3/HOXD8/TBXT/PKD1L1/RNF2/TBX3	25
BP	GO:0021549	cerebellum development	27|2417	86|14725	0.000423553	0.017128	ENSG00000128602/ENSG00000074047/ENSG00000128573/ENSG00000183873/ENSG00000018236/ENSG00000163064/ENSG00000198121/ENSG00000054598/ENSG00000117707/ENSG00000166165/ENSG00000129159/ENSG00000133026/ENSG00000135919/ENSG00000149269/ENSG00000180616/ENSG00000128881/ENSG00000103494/ENSG00000069667/ENSG00000116906/ENSG00000159131/ENSG00000152208/ENSG00000102924/ENSG00000117569/ENSG00000111087/ENSG00000135049…	SMO/GLI2/FOXP2/SCN5A/CNTN1/EN1/LPAR1/FOXC1/PROX1/CKB/KCNC1/MYH10/SERPINE2/PAK1/SSTR2/TTBK2/RPGRIP1L/RORA/GNPAT/GART/GRID2/CBLN1/PTBP2/GLI1/AGTPBP1/HNRNPD/NEUROD2	27
BP	GO:0055006	cardiac cell development	22|2417	65|14725	0.000444749	0.0178567	ENSG00000112276/ENSG00000183072/ENSG00000069702/ENSG00000162614/ENSG00000183023/ENSG00000077522/ENSG00000117707/ENSG00000154639/ENSG00000164093/ENSG00000133026/ENSG00000155657/ENSG00000154556/ENSG00000149269/ENSG00000182533/ENSG00000134853/ENSG00000153187/ENSG00000134775/ENSG00000113721/ENSG00000198563/ENSG00000151320/ENSG00000163069/ENSG00000135111	BVES/NKX2-5/TGFBR3/NEXN/SLC8A1/ACTN2/PROX1/CXADR/PITX2/MYH10/TTN/SORBS2/PAK1/CAV3/PDGFRA/HNRNPU/FHOD3/PDGFRB/DDX39B/AKAP6/SGCB/TBX3	22
BP	GO:1902742	apoptotic process involved in development	13|2417	30|14725	0.000456698	0.0178642	ENSG00000183072/ENSG00000138795/ENSG00000185008/ENSG00000145147/ENSG00000054598/ENSG00000164107/ENSG00000075891/ENSG00000184347/ENSG00000145794/ENSG00000176692/ENSG00000138083/ENSG00000149554/ENSG00000137713	NKX2-5/LEF1/ROBO2/SLIT2/FOXC1/HAND2/PAX2/SLIT3/MEGF10/FOXC2/SIX3/CHEK1/PPP2R1B	13
BP	GO:0010463	mesenchymal cell proliferation	17|2417	45|14725	0.000460828	0.0178642	ENSG00000147257/ENSG00000184058/ENSG00000148516/ENSG00000128602/ENSG00000128573/ENSG00000114251/ENSG00000170577/ENSG00000103241/ENSG00000166341/ENSG00000164107/ENSG00000168779/ENSG00000116132/ENSG00000163132/ENSG00000196159/ENSG00000126778/ENSG00000102678/ENSG00000143867	GPC3/TBX1/ZEB1/SMO/FOXP2/WNT5A/SIX2/FOXF1/DCHS1/HAND2/SHOX2/PRRX1/MSX1/FAT4/SIX1/FGF9/OSR1	17
BP	GO:0048641	regulation of skeletal muscle tissue development	17|2417	45|14725	0.000460828	0.0178642	ENSG00000184058/ENSG00000122691/ENSG00000081189/ENSG00000168779/ENSG00000154928/ENSG00000239474/ENSG00000095587/ENSG00000064309/ENSG00000048052/ENSG00000003137/ENSG00000126778/ENSG00000145794/ENSG00000138379/ENSG00000129152/ENSG00000169884/ENSG00000100201/ENSG00000154342	TBX1/TWIST1/MEF2C/SHOX2/EPHB1/KLHL41/TLL2/CDON/HDAC9/CYP26B1/SIX1/MEGF10/MSTN/MYOD1/WNT10B/DDX17/WNT3A	17
BP	GO:0086010	membrane depolarization during action potential	17|2417	45|14725	0.000460828	0.0178642	ENSG00000145362/ENSG00000183873/ENSG00000148408/ENSG00000153956/ENSG00000183023/ENSG00000136531/ENSG00000177098/ENSG00000166257/ENSG00000007314/ENSG00000108961/ENSG00000165995/ENSG00000182533/ENSG00000169432/ENSG00000149575/ENSG00000153253/ENSG00000151067/ENSG00000168356	ANK2/SCN5A/CACNA1B/CACNA2D1/SLC8A1/SCN2A/SCN4B/SCN3B/SCN4A/RANGRF/CACNB2/CAV3/SCN9A/SCN2B/SCN3A/CACNA1C/SCN11A	17
BP	GO:2000179	positive regulation of neural precursor cell proliferation	17|2417	45|14725	0.000460828	0.0178642	ENSG00000128602/ENSG00000074047/ENSG00000007372/ENSG00000176165/ENSG00000117707/ENSG00000142700/ENSG00000173404/ENSG00000064309/ENSG00000112333/ENSG00000107859/ENSG00000162946/ENSG00000066279/ENSG00000111087/ENSG00000254087/ENSG00000154342/ENSG00000104290/ENSG00000101160	SMO/GLI2/PAX6/FOXG1/PROX1/DMRTA2/INSM1/CDON/NR2E1/PITX3/DISC1/ASPM/GLI1/LYN/WNT3A/FZD3/CTSZ	17
BP	GO:0048747	muscle fiber development	18|2417	49|14725	0.000471583	0.018156	ENSG00000154277/ENSG00000233276/ENSG00000128591/ENSG00000128602/ENSG00000138795/ENSG00000162614/ENSG00000198947/ENSG00000154639/ENSG00000168779/ENSG00000155657/ENSG00000239474/ENSG00000048052/ENSG00000143632/ENSG00000129152/ENSG00000169884/ENSG00000007402/ENSG00000049883/ENSG00000163069	UCHL1/GPX1/FLNC/SMO/LEF1/NEXN/DMD/CXADR/SHOX2/TTN/KLHL41/HDAC9/ACTA1/MYOD1/WNT10B/CACNA2D2/PTCD2/SGCB	18
BP	GO:0035265	organ growth	41|2417	150|14725	0.000475128	0.018168	ENSG00000152661/ENSG00000128602/ENSG00000181690/ENSG00000136630/ENSG00000183072/ENSG00000069702/ENSG00000072840/ENSG00000077092/ENSG00000116678/ENSG00000162733/ENSG00000138685/ENSG00000169946/ENSG00000184937/ENSG00000054598/ENSG00000117707/ENSG00000108576/ENSG00000173068/ENSG00000081189/ENSG00000173706/ENSG00000188729/ENSG00000170989/ENSG00000164532/ENSG00000154556/ENSG00000149269/ENSG00000105664…	GJA1/SMO/PLAG1/HLX/NKX2-5/TGFBR3/EVC/RARB/LEPR/DDR2/FGF2/ZFPM2/WT1/FOXC1/PROX1/SLC6A4/BNC2/MEF2C/HEG1/OSTN/S1PR1/TBX20/SORBS2/PAK1/COMP/TP73/MEIS1/FLVCR1/CAV3/FOXC2/SPRY2/ACVR2B/COL27A1/NOG/FGF9/GLI1/PDGFRB/DDX39B/SAV1/CACNA2D2/AKAP6	41
BP	GO:0050678	regulation of epithelial cell proliferation	70|2417	292|14725	0.000504039	0.0191433	ENSG00000152661/ENSG00000233276/ENSG00000147257/ENSG00000184058/ENSG00000128602/ENSG00000106004/ENSG00000128573/ENSG00000091136/ENSG00000128918/ENSG00000019549/ENSG00000114251/ENSG00000037280/ENSG00000069702/ENSG00000016082/ENSG00000102755/ENSG00000183873/ENSG00000007372/ENSG00000122691/ENSG00000138685/ENSG00000119630/ENSG00000006377/ENSG00000185920/ENSG00000132386/ENSG00000105880/ENSG00000164066…	GJA1/GPX1/GPC3/TBX1/SMO/HOXA5/FOXP2/LAMB1/ALDH1A2/SNAI2/WNT5A/FLT4/TGFBR3/ISL1/FLT1/SCN5A/PAX6/TWIST1/FGF2/PGF/DLX6/PTCH1/SERPINF1/DLX5/INTU/PROX1/PPP1R16B/MEF2C/EYA1/PTPRM/SFRP1/PAX2/NRP2/EDNRB/CD109/JCAD/AKT3/THBS4/BMP6/PRKD1/TNMD/APLN/HAS2/AGTR1/TNFSF12/HMOX1/SIX1/SPARC/VASH2/KIF3A/VEGFD/STXBP4/NOG/FGF9/GLI1/EGFR/VASH1/WNT10B/BIRC5/SAV1/MIR10B/NKX2-8/SULF1/OSR1/MED1/PRKCA/WNT3A/RGCC/SIRT1/JUN	70
BP	GO:0021602	cranial nerve morphogenesis	12|2417	27|14725	0.000570541	0.0214287	ENSG00000184058/ENSG00000105997/ENSG00000105991/ENSG00000120093/ENSG00000198947/ENSG00000075213/ENSG00000075891/ENSG00000154928/ENSG00000173917/ENSG00000177301/ENSG00000126778/ENSG00000128652	TBX1/HOXA3/HOXA1/HOXB3/DMD/SEMA3A/PAX2/EPHB1/HOXB2/KCNA2/SIX1/HOXD3	12
BP	GO:0007528	neuromuscular junction development	15|2417	38|14725	0.000571838	0.0214287	ENSG00000181104/ENSG00000187498/ENSG00000182389/ENSG00000126970/ENSG00000188153/ENSG00000134569/ENSG00000152818/ENSG00000165995/ENSG00000188906/ENSG00000206561/ENSG00000126778/ENSG00000041982/ENSG00000148053/ENSG00000007402/ENSG00000165917	F2R/COL4A1/CACNB4/ZC4H2/COL4A5/LRP4/UTRN/CACNB2/LRRK2/COLQ/SIX1/TNC/NTRK2/CACNA2D2/RAPSN	15
BP	GO:0007600	sensory perception	100|2417	448|14725	0.00059181	0.0220302	ENSG00000154277/ENSG00000233276/ENSG00000079215/ENSG00000184058/ENSG00000169860/ENSG00000050555/ENSG00000182963/ENSG00000019549/ENSG00000144488/ENSG00000152192/ENSG00000120068/ENSG00000141404/ENSG00000181104/ENSG00000010810/ENSG00000138795/ENSG00000105991/ENSG00000185483/ENSG00000007372/ENSG00000135903/ENSG00000166402/ENSG00000105928/ENSG00000112319/ENSG00000107736/ENSG00000095777/ENSG00000006611…	UCHL1/GPX1/SLC1A3/TBX1/P2RY1/LAMC3/GJC1/SNAI2/ESPNL/POU4F1/HOXB8/GNAL/F2R/FYN/LEF1/HOXA1/ROR1/PAX6/PAX3/TUB/GSDME/EYA4/CDH23/MYO3A/USH1C/MME/EYA1/KIT/OPRD1/PAX2/SPX/PIEZO2/SLC24A4/EPHB1/EDNRB/BBS7/ABLIM1/SERPINE2/COL2A1/SOBP/REEP2/TMEM100/AOC2/SCN3B/NR2E1/GJA3/OTOG/ARL6/TRPV1/GBX1/CHRNA4/CYP4V2/TRPA1/FAM161A/ZIC2/KCNA2/COCH/CACNB2/RABGGTB/SCN9A/LRIT3/SIX1/PGAP1/SPRY2/CCDC66/DNM1/EYS/POU6F2/OPN1SW…	100
BP	GO:1901342	regulation of vasculature development	67|2417	279|14725	0.000624762	0.0229611	ENSG00000149948/ENSG00000134871/ENSG00000164683/ENSG00000126016/ENSG00000106004/ENSG00000196628/ENSG00000114251/ENSG00000016082/ENSG00000102755/ENSG00000122691/ENSG00000138685/ENSG00000166501/ENSG00000135298/ENSG00000119630/ENSG00000116761/ENSG00000184937/ENSG00000132386/ENSG00000054598/ENSG00000101445/ENSG00000157404/ENSG00000173482/ENSG00000104332/ENSG00000101017/ENSG00000134954/ENSG00000131477…	HMGA2/COL4A2/HEY1/AMOT/HOXA5/TCF4/WNT5A/ISL1/FLT1/TWIST1/FGF2/PRKCB/ADGRB3/PGF/CTH/WT1/SERPINF1/FOXC1/PPP1R16B/KIT/PTPRM/SFRP1/CD40/ETS1/RAMP2/TMEM100/JCAD/SPINK5/AKT3/NR2E1/THBS4/PRKD1/MIR221/ADGRA2/TNMD/HDAC9/PTGIS/AGTR1/TNFSF12/DDAH1/TSPAN12/CCBE1/HMOX1/SPARC/FOXC2/SPRY2/SEMA6A/VASH2/AQP1/PTGS2/EGLN1/CHRNA7/VEGFD/PROK2/CD34/ITGA5/UTS2R/BRCA1/VASH1/MIR10B/SULF1/FOXO4/PRKCA/RGCC/ENPP2/MIR196A1/S…	67
BP	GO:0010721	negative regulation of cell development	66|2417	274|14725	0.000626269	0.0229611	ENSG00000146122/ENSG00000114251/ENSG00000016082/ENSG00000072832/ENSG00000175745/ENSG00000077942/ENSG00000007372/ENSG00000176165/ENSG00000119866/ENSG00000163623/ENSG00000169760/ENSG00000145147/ENSG00000205927/ENSG00000005513/ENSG00000198597/ENSG00000198121/ENSG00000090932/ENSG00000148704/ENSG00000108576/ENSG00000198947/ENSG00000135333/ENSG00000138136/ENSG00000075213/ENSG00000188729/ENSG00000133104…	DAAM2/WNT5A/ISL1/CRMP1/NR2F1/FBLN1/PAX6/FOXG1/BCL11A/NKX6-1/NLGN1/SLIT2/OLIG2/SOX8/ZNF536/LPAR1/DLL3/VAX1/SLC6A4/DMD/EPHA7/LBX1/SEMA3A/OSTN/SPART/DLX2/EDNRB/DNM3/SEMA3G/LRP4/NKX2-2/RFLNB/PAK1/NR2E1/NLGN3/HOXA2/TP73/TRPV1/GAL/FUOM/RGMA/PITX3/MEIS1/PAQR3/GFI1/CAV3/LRRK2/ISL2/HDAC2/PTPRO/CNTF/CLDN18/ASPM/DIXDC1/HOOK3/SIX3/NOG/RUFY3/THOC2/FBN1/ID4/MED1/WNT3A/MIB1/CTSZ/DENND5A	66
BP	GO:0003013	circulatory system process	101|2417	454|14725	0.000629072	0.0229611	ENSG00000152661/ENSG00000233276/ENSG00000169860/ENSG00000145362/ENSG00000213949/ENSG00000182963/ENSG00000112276/ENSG00000184185/ENSG00000181104/ENSG00000183072/ENSG00000183873/ENSG00000087258/ENSG00000182389/ENSG00000148408/ENSG00000153956/ENSG00000183023/ENSG00000099139/ENSG00000145147/ENSG00000007171/ENSG00000213366/ENSG00000108984/ENSG00000054598/ENSG00000061918/ENSG00000108576/ENSG00000198947…	GJA1/GPX1/P2RY1/ANK2/ITGA1/GJC1/BVES/KCNJ12/F2R/NKX2-5/SCN5A/GNAO1/CACNB4/CACNA1B/CACNA2D1/SLC8A1/PCSK5/SLIT2/NOS2/GSTM2/MAP2K6/FOXC1/GUCY1B1/SLC6A4/DMD/MME/CXADR/HEG1/SEMA3A/RGS2/CELF2/PTPRM/SPX/EDNRB/TRHDE/ATP1B2/RAMP2/TTN/SCN4B/TBX20/GNB3/CACNA2D3/PRKG1/SCN3B/CHRM3/WDR35/GUCY1A1/FXYD6/DOCK4/SLC1A1/CACNG8/ANGPT1/HOXB2/CORIN/ADORA2B/APLN/PPARA/FOXN4/GRIP2/AGTR1/RANGRF/CACNB2/CAV3/SLC8A3/DDAH1/FL…	101
BP	GO:0007416	synapse assembly	36|2417	129|14725	0.000673067	0.0244084	ENSG00000165300/ENSG00000170558/ENSG00000152192/ENSG00000114251/ENSG00000150471/ENSG00000131409/ENSG00000185008/ENSG00000145335/ENSG00000169760/ENSG00000135298/ENSG00000121871/ENSG00000153707/ENSG00000135333/ENSG00000081189/ENSG00000111249/ENSG00000154928/ENSG00000198908/ENSG00000110076/ENSG00000197959/ENSG00000150625/ENSG00000134569/ENSG00000196338/ENSG00000186472/ENSG00000125848/ENSG00000069188…	SLITRK5/CDH2/POU4F1/WNT5A/ADGRL3/LRRC4B/ROBO2/SNCA/NLGN1/ADGRB3/SLITRK3/PTPRD/EPHA7/MEF2C/CUX2/EPHB1/BHLHB9/NRXN2/DNM3/GPM6A/LRP4/NLGN3/PCLO/FLRT3/SDK2/NRXN3/GNPAT/COLQ/SIX1/GRID2/CBLN1/SPOCK2/NTRK2/IL1RAP/NTRK1/WNT3A	36
BP	GO:0021987	cerebral cortex development	32|2417	111|14725	0.000713261	0.0257003	ENSG00000170558/ENSG00000128602/ENSG00000128573/ENSG00000277586/ENSG00000184486/ENSG00000091136/ENSG00000007372/ENSG00000176165/ENSG00000145147/ENSG00000198914/ENSG00000198947/ENSG00000075213/ENSG00000142700/ENSG00000170370/ENSG00000064309/ENSG00000112333/ENSG00000136352/ENSG00000196159/ENSG00000135638/ENSG00000172728/ENSG00000159131/ENSG00000122585/ENSG00000172238/ENSG00000148053/ENSG00000066279…	CDH2/SMO/FOXP2/NEFL/POU3F2/LAMB1/PAX6/FOXG1/SLIT2/POU3F3/DMD/SEMA3A/DMRTA2/EMX2/CDON/NR2E1/NKX2-1/FAT4/EMX1/FUT10/GART/NPY/ATOH1/NTRK2/ASPM/DIXDC1/AFDN/EGFR/GNG12/HTR6/EFHC1/MCPH1	32
BP	GO:0008015	blood circulation	100|2417	451|14725	0.000751254	0.0268968	ENSG00000152661/ENSG00000233276/ENSG00000169860/ENSG00000145362/ENSG00000213949/ENSG00000182963/ENSG00000112276/ENSG00000184185/ENSG00000181104/ENSG00000183072/ENSG00000183873/ENSG00000087258/ENSG00000182389/ENSG00000148408/ENSG00000153956/ENSG00000183023/ENSG00000099139/ENSG00000145147/ENSG00000007171/ENSG00000213366/ENSG00000108984/ENSG00000054598/ENSG00000061918/ENSG00000108576/ENSG00000198947…	GJA1/GPX1/P2RY1/ANK2/ITGA1/GJC1/BVES/KCNJ12/F2R/NKX2-5/SCN5A/GNAO1/CACNB4/CACNA1B/CACNA2D1/SLC8A1/PCSK5/SLIT2/NOS2/GSTM2/MAP2K6/FOXC1/GUCY1B1/SLC6A4/DMD/MME/CXADR/SEMA3A/RGS2/CELF2/PTPRM/SPX/EDNRB/TRHDE/ATP1B2/RAMP2/TTN/SCN4B/TBX20/GNB3/CACNA2D3/PRKG1/SCN3B/CHRM3/WDR35/GUCY1A1/FXYD6/DOCK4/SLC1A1/CACNG8/ANGPT1/HOXB2/CORIN/ADORA2B/APLN/PPARA/FOXN4/GRIP2/AGTR1/RANGRF/CACNB2/CAV3/SLC8A3/DDAH1/FLI1/SC…	100
BP	GO:0048592	eye morphogenesis	36|2417	130|14725	0.000786355	0.0279753	ENSG00000138829/ENSG00000148516/ENSG00000177707/ENSG00000114251/ENSG00000077092/ENSG00000137273/ENSG00000007372/ENSG00000122691/ENSG00000005513/ENSG00000117707/ENSG00000204262/ENSG00000140807/ENSG00000164093/ENSG00000173482/ENSG00000075891/ENSG00000154928/ENSG00000117122/ENSG00000064309/ENSG00000113966/ENSG00000107859/ENSG00000143995/ENSG00000139445/ENSG00000069188/ENSG00000106025/ENSG00000198707…	FBN2/ZEB1/NECTIN3/WNT5A/RARB/FOXF2/PAX6/TWIST1/SOX8/PROX1/COL5A2/NKD1/PITX2/PTPRM/PAX2/EPHB1/MFAP2/CDON/ARL6/PITX3/MEIS1/FOXN4/SDK2/TSPAN12/CEP290/CCDC66/RORB/CNTF/NTRK2/SIX3/AGTPBP1/FBN1/MEGF11/PROX2/PDE6C/COL8A1	36
BP	GO:0032835	glomerulus development	19|2417	55|14725	0.000803231	0.028396	ENSG00000162738/ENSG00000116962/ENSG00000184937/ENSG00000163884/ENSG00000054598/ENSG00000081189/ENSG00000138193/ENSG00000075891/ENSG00000154188/ENSG00000163909/ENSG00000176692/ENSG00000134853/ENSG00000151490/ENSG00000174059/ENSG00000183691/ENSG00000113721/ENSG00000137573/ENSG00000143867/ENSG00000102900	VANGL2/NID1/WT1/KLF15/FOXC1/MEF2C/PLCE1/PAX2/ANGPT1/HEYL/FOXC2/PDGFRA/PTPRO/CD34/NOG/PDGFRB/SULF1/OSR1/NUP93	19
BP	GO:0001101	response to acid chemical	72|2417	307|14725	0.000816652	0.02869	ENSG00000085662/ENSG00000152661/ENSG00000084207/ENSG00000162409/ENSG00000184058/ENSG00000148516/ENSG00000197565/ENSG00000128918/ENSG00000162909/ENSG00000114251/ENSG00000187498/ENSG00000069702/ENSG00000010810/ENSG00000149212/ENSG00000129596/ENSG00000114200/ENSG00000119866/ENSG00000185920/ENSG00000132386/ENSG00000108576/ENSG00000204262/ENSG00000198947/ENSG00000186469/ENSG00000104332/ENSG00000075891…	AKR1B1/GJA1/GSTP1/PRKAA2/TBX1/ZEB1/COL4A6/ALDH1A2/CAPN2/WNT5A/COL4A1/TGFBR3/FYN/SESN3/CDO1/BCHE/BCL11A/PTCH1/SERPINF1/SLC6A4/COL5A2/DMD/GNG2/SFRP1/PAX2/MMP2/GLDC/CYP2E1/HOXA2/BMP6/LTK/CYP26B1/TNFSF4/COL6A1/GNPAT/DHFR/PTGFR/SIX1/SPARC/IPO5/AQP1/PDGFRA/SLC38A9/RORB/FOXO1/PTGS2/HDAC2/AVPR1A/TOMM20/PDGFC/RRAGD/FABP3/TNC/NTRK2/GCLM/TBXAS1/EGFR/WNT10B/ATP2B4/NTRK1/PDGFRB/FZD10/TBXT/HNRNPD/OSR1/LYN/WNT3…	72
BP	GO:0021772	olfactory bulb development	13|2417	32|14725	0.000959374	0.0330942	ENSG00000114251/ENSG00000103449/ENSG00000185008/ENSG00000145147/ENSG00000105880/ENSG00000075213/ENSG00000115844/ENSG00000164853/ENSG00000112333/ENSG00000103494/ENSG00000188906/ENSG00000095713/ENSG00000135049	WNT5A/SALL1/ROBO2/SLIT2/DLX5/SEMA3A/DLX2/UNCX/NR2E1/RPGRIP1L/LRRK2/CRTAC1/AGTPBP1	13
BP	GO:0098815	modulation of excitatory postsynaptic potential	13|2417	32|14725	0.000959374	0.0330942	ENSG00000169760/ENSG00000144868/ENSG00000111249/ENSG00000196338/ENSG00000176406/ENSG00000188906/ENSG00000166664/ENSG00000102924/ENSG00000175344/ENSG00000087053/ENSG00000161681/ENSG00000101489/ENSG00000079841	NLGN1/TMEM108/CUX2/NLGN3/RIMS2/LRRK2/CHRFAM7A/CBLN1/CHRNA7/MTMR2/SHANK1/CELF4/RIMS1	13
BP	GO:0050768	negative regulation of neurogenesis	58|2417	238|14725	0.00096015	0.0330942	ENSG00000146122/ENSG00000114251/ENSG00000016082/ENSG00000072832/ENSG00000175745/ENSG00000007372/ENSG00000176165/ENSG00000119866/ENSG00000163623/ENSG00000169760/ENSG00000145147/ENSG00000205927/ENSG00000005513/ENSG00000198597/ENSG00000198121/ENSG00000090932/ENSG00000148704/ENSG00000108576/ENSG00000198947/ENSG00000135333/ENSG00000138136/ENSG00000075213/ENSG00000188729/ENSG00000133104/ENSG00000115844…	DAAM2/WNT5A/ISL1/CRMP1/NR2F1/PAX6/FOXG1/BCL11A/NKX6-1/NLGN1/SLIT2/OLIG2/SOX8/ZNF536/LPAR1/DLL3/VAX1/SLC6A4/DMD/EPHA7/LBX1/SEMA3A/OSTN/SPART/DLX2/EDNRB/DNM3/SEMA3G/LRP4/NKX2-2/NR2E1/NLGN3/HOXA2/TP73/FUOM/RGMA/PITX3/MEIS1/PAQR3/GFI1/LRRK2/ISL2/HDAC2/PTPRO/CNTF/ASPM/DIXDC1/HOOK3/SIX3/NOG/RUFY3/THOC2/ID4/MED1/WNT3A/MIB1/CTSZ/DENND5A	58
BP	GO:0050769	positive regulation of neurogenesis	91|2417	407|14725	0.000965567	0.0330942	ENSG00000148516/ENSG00000128602/ENSG00000074047/ENSG00000196628/ENSG00000143869/ENSG00000166313/ENSG00000277586/ENSG00000181690/ENSG00000114251/ENSG00000183072/ENSG00000010810/ENSG00000077092/ENSG00000185008/ENSG00000169554/ENSG00000131711/ENSG00000171517/ENSG00000007372/ENSG00000176165/ENSG00000163623/ENSG00000018236/ENSG00000169760/ENSG00000143858/ENSG00000126970/ENSG00000145147/ENSG00000205927…	ZEB1/SMO/GLI2/TCF4/GDF7/APBB1/NEFL/PLAG1/WNT5A/NKX2-5/FYN/RARB/ROBO2/ZEB2/MAP1B/LPAR3/PAX6/FOXG1/NKX6-1/CNTN1/NLGN1/SYT2/ZC4H2/SLIT2/OLIG2/SOX8/LPAR1/PTPRD/SERPINF1/PROX1/BIN1/NDNF/DMD/MEF2C/TUBB2B/SEMA3A/KIT/DMRTA2/CUX2/SHOX2/DLX2/BHLHB9/SERPINE2/SERPINI1/LRRC7/NKX2-2/PAK1/CDON/HEYL/BMP6/ZNF804A/LTK/TP73/PRKD1/MIR221/PAK3/RGMA/RIMS2/CAPRIN2/SPEN/DISC1/FKBP1B/P3H1/SEMA6A/HDAC2/ATOH1/CAMK1/GDF6/CN…	91
BP	GO:0003206	cardiac chamber morphogenesis	32|2417	113|14725	0.000995456	0.0334998	ENSG00000164683/ENSG00000162738/ENSG00000154734/ENSG00000184058/ENSG00000128602/ENSG00000152192/ENSG00000114251/ENSG00000183072/ENSG00000069702/ENSG00000016082/ENSG00000077092/ENSG00000103241/ENSG00000169946/ENSG00000054598/ENSG00000117707/ENSG00000113196/ENSG00000164107/ENSG00000081189/ENSG00000173706/ENSG00000164093/ENSG00000168779/ENSG00000118257/ENSG00000164532/ENSG00000163909/ENSG00000182533…	HEY1/VANGL2/ADAMTS1/TBX1/SMO/POU4F1/WNT5A/NKX2-5/TGFBR3/ISL1/RARB/FOXF1/ZFPM2/FOXC1/PROX1/HAND1/HAND2/MEF2C/HEG1/PITX2/SHOX2/NRP2/TBX20/HEYL/CAV3/FOXC2/EGLN1/NOG/SAV1/PTCD2/MED1/TBX3	32
BP	GO:0086014	atrial cardiac muscle cell action potential	9|2417	18|14725	0.00100124	0.0334998	ENSG00000152661/ENSG00000145362/ENSG00000182963/ENSG00000183873/ENSG00000166257/ENSG00000165995/ENSG00000113569/ENSG00000151067/ENSG00000053918	GJA1/ANK2/GJC1/SCN5A/SCN3B/CACNB2/NUP155/CACNA1C/KCNQ1	9
BP	GO:0086026	atrial cardiac muscle cell to AV node cell signaling	9|2417	18|14725	0.00100124	0.0334998	ENSG00000152661/ENSG00000145362/ENSG00000182963/ENSG00000183873/ENSG00000166257/ENSG00000165995/ENSG00000113569/ENSG00000151067/ENSG00000053918	GJA1/ANK2/GJC1/SCN5A/SCN3B/CACNB2/NUP155/CACNA1C/KCNQ1	9
BP	GO:0086066	atrial cardiac muscle cell to AV node cell communication	9|2417	18|14725	0.00100124	0.0334998	ENSG00000152661/ENSG00000145362/ENSG00000182963/ENSG00000183873/ENSG00000166257/ENSG00000165995/ENSG00000113569/ENSG00000151067/ENSG00000053918	GJA1/ANK2/GJC1/SCN5A/SCN3B/CACNB2/NUP155/CACNA1C/KCNQ1	9
BP	GO:0055008	cardiac muscle tissue morphogenesis	19|2417	56|14725	0.00103119	0.034133	ENSG00000152192/ENSG00000114251/ENSG00000183072/ENSG00000069702/ENSG00000016082/ENSG00000169946/ENSG00000054598/ENSG00000117707/ENSG00000113196/ENSG00000173706/ENSG00000164093/ENSG00000155657/ENSG00000170989/ENSG00000164532/ENSG00000176692/ENSG00000135766/ENSG00000183691/ENSG00000049883/ENSG00000125686	POU4F1/WNT5A/NKX2-5/TGFBR3/ISL1/ZFPM2/FOXC1/PROX1/HAND1/HEG1/PITX2/TTN/S1PR1/TBX20/FOXC2/EGLN1/NOG/PTCD2/MED1	19
BP	GO:0017145	stem cell division	14|2417	36|14725	0.00103231	0.034133	ENSG00000147889/ENSG00000162738/ENSG00000138795/ENSG00000182742/ENSG00000119715/ENSG00000134532/ENSG00000213626/ENSG00000157404/ENSG00000116641/ENSG00000109906/ENSG00000066279/ENSG00000125676/ENSG00000163938/ENSG00000154342	CDKN2A/VANGL2/LEF1/HOXB4/ESRRB/SOX5/LBH/KIT/DOCK7/ZBTB16/ASPM/THOC2/GNL3/WNT3A	14
BP	GO:0045765	regulation of angiogenesis	62|2417	259|14725	0.00106137	0.0346804	ENSG00000149948/ENSG00000134871/ENSG00000126016/ENSG00000106004/ENSG00000196628/ENSG00000114251/ENSG00000016082/ENSG00000102755/ENSG00000122691/ENSG00000138685/ENSG00000166501/ENSG00000135298/ENSG00000119630/ENSG00000132386/ENSG00000054598/ENSG00000101445/ENSG00000173482/ENSG00000104332/ENSG00000101017/ENSG00000134954/ENSG00000131477/ENSG00000165757/ENSG00000133710/ENSG00000117020/ENSG00000112333…	HMGA2/COL4A2/AMOT/HOXA5/TCF4/WNT5A/ISL1/FLT1/TWIST1/FGF2/PRKCB/ADGRB3/PGF/SERPINF1/FOXC1/PPP1R16B/PTPRM/SFRP1/CD40/ETS1/RAMP2/JCAD/SPINK5/AKT3/NR2E1/THBS4/PRKD1/MIR221/ADGRA2/TNMD/HDAC9/PTGIS/AGTR1/TNFSF12/DDAH1/TSPAN12/CCBE1/HMOX1/SPARC/FOXC2/SPRY2/SEMA6A/VASH2/AQP1/PTGS2/EGLN1/CHRNA7/VEGFD/PROK2/CD34/ITGA5/UTS2R/BRCA1/VASH1/MIR10B/SULF1/FOXO4/PRKCA/RGCC/ENPP2/MIR196A1/SIRT1	62
BP	GO:0021846	cell proliferation in forebrain	11|2417	25|14725	0.00107123	0.0346804	ENSG00000159217/ENSG00000184486/ENSG00000169554/ENSG00000198914/ENSG00000170370/ENSG00000116641/ENSG00000150764/ENSG00000168172/ENSG00000138083/ENSG00000167325/ENSG00000154342	IGF2BP1/POU3F2/ZEB2/POU3F3/EMX2/DOCK7/DIXDC1/HOOK3/SIX3/RRM1/WNT3A	11
BP	GO:0021904	dorsal/ventral neural tube patterning	11|2417	25|14725	0.00107123	0.0346804	ENSG00000128602/ENSG00000074047/ENSG00000143147/ENSG00000185920/ENSG00000009709/ENSG00000146350/ENSG00000131437/ENSG00000157796/ENSG00000204104/ENSG00000142875/ENSG00000154342	SMO/GLI2/GPR161/PTCH1/PAX7/TBC1D32/KIF3A/WDR19/TRAF3IP1/PRKACB/WNT3A	11
BP	GO:0060348	bone development	45|2417	175|14725	0.00107354	0.0346804	ENSG00000102024/ENSG00000005073/ENSG00000077092/ENSG00000122691/ENSG00000166341/ENSG00000182742/ENSG00000197467/ENSG00000054598/ENSG00000105880/ENSG00000081189/ENSG00000164093/ENSG00000157404/ENSG00000125813/ENSG00000168779/ENSG00000120693/ENSG00000174705/ENSG00000128606/ENSG00000139219/ENSG00000162367/ENSG00000183688/ENSG00000105664/ENSG00000162551/ENSG00000163132/ENSG00000153162/ENSG00000196159…	PLS3/HOXA11/RARB/TWIST1/DCHS1/HOXB4/COL13A1/FOXC1/DLX5/MEF2C/PITX2/KIT/PAX1/SHOX2/SMAD9/SH3PXD2B/LRRC17/COL2A1/TAL1/RFLNB/COMP/ALPL/MSX1/BMP6/FAT4/RIPPLY2/MEIS1/HAS2/CYP26B1/NAB1/FLI1/SPARC/P3H1/PDGFC/CLDN18/COL27A1/SLC9B2/TBXT/SULF1/RAB23/FBN1/MED1/BBX/FOXN3/MCPH1	45
BP	GO:0021915	neural tube development	41|2417	156|14725	0.00111084	0.0355067	ENSG00000162738/ENSG00000128602/ENSG00000074047/ENSG00000143869/ENSG00000128918/ENSG00000114251/ENSG00000169554/ENSG00000143147/ENSG00000007372/ENSG00000122691/ENSG00000166341/ENSG00000081059/ENSG00000163064/ENSG00000180318/ENSG00000165617/ENSG00000185920/ENSG00000171956/ENSG00000164066/ENSG00000117707/ENSG00000099954/ENSG00000009709/ENSG00000146350/ENSG00000104332/ENSG00000075891/ENSG00000120868…	VANGL2/SMO/GLI2/GDF7/ALDH1A2/WNT5A/ZEB2/GPR161/PAX6/TWIST1/DCHS1/TCF7/EN1/ALX1/DACT1/PTCH1/FOXB1/INTU/PROX1/CECR2/PAX7/TBC1D32/SFRP1/PAX2/APAF1/TRIM71/PLXNA2/NUP133/RGMA/RPGRIP1L/GLMN/KIF3A/NOG/WDR19/TRAF3IP1/SALL2/TBXT/PRKACB/WNT3A/MIB1/FZD3	41
BP	GO:0060541	respiratory system development	47|2417	185|14725	0.00111176	0.0355067	ENSG00000147257/ENSG00000162738/ENSG00000106004/ENSG00000074047/ENSG00000128573/ENSG00000162493/ENSG00000128918/ENSG00000114251/ENSG00000037280/ENSG00000138795/ENSG00000103241/ENSG00000169946/ENSG00000184937/ENSG00000105880/ENSG00000117707/ENSG00000087116/ENSG00000173706/ENSG00000164093/ENSG00000178860/ENSG00000113083/ENSG00000136352/ENSG00000162878/ENSG00000103494/ENSG00000183287/ENSG00000126778…	GPC3/VANGL2/HOXA5/GLI2/FOXP2/PDPN/ALDH1A2/WNT5A/FLT4/LEF1/FOXF1/ZFPM2/WT1/DLX5/PROX1/ADAMTS2/HEG1/PITX2/MSC/LOX/NKX2-1/PKDCC/RPGRIP1L/CCBE1/SIX1/SPARC/SPRY2/ZIC3/PDGFRA/TNC/EDA/ACVR2B/HSPB11/NOG/FGF9/GLI1/EGFR/KCNAB1/PDGFRB/SAV1/NKX2-8/LIPA/RDH10/AARD/CCDC39/CTSZ/DISP1	47
BP	GO:0036342	post-anal tail morphogenesis	8|2417	15|14725	0.00112578	0.0356904	ENSG00000162738/ENSG00000114251/ENSG00000166341/ENSG00000203877/ENSG00000204104/ENSG00000164458/ENSG00000154342/ENSG00000104290	VANGL2/WNT5A/DCHS1/RIPPLY2/TRAF3IP1/TBXT/WNT3A/FZD3	8
BP	GO:0060560	developmental growth involved in morphogenesis	50|2417	200|14725	0.0011535	0.0356904	ENSG00000162738/ENSG00000128714/ENSG00000114251/ENSG00000103449/ENSG00000124785/ENSG00000169554/ENSG00000131711/ENSG00000171517/ENSG00000119866/ENSG00000163623/ENSG00000143858/ENSG00000145147/ENSG00000158321/ENSG00000144868/ENSG00000198689/ENSG00000140807/ENSG00000135333/ENSG00000075213/ENSG00000188729/ENSG00000133104/ENSG00000104332/ENSG00000118257/ENSG00000143032/ENSG00000170989/ENSG00000107295…	VANGL2/HOXD13/WNT5A/SALL1/NRN1/ZEB2/MAP1B/LPAR3/BCL11A/NKX6-1/SYT2/SLIT2/AUTS2/TMEM108/SLC9A6/NKD1/EPHA7/SEMA3A/OSTN/SPART/SFRP1/NRP2/BARHL2/S1PR1/SH3GL2/SEMA3G/PAK1/NLGN3/PLXNA2/GAL/WASF1/FLRT3/RGMA/EMX1/RIMS2/SLIT3/SIX1/SPRY2/C9orf72/TNC/SYT17/RUFY3/RIMS1/VCL/TTL/MED1/WNT3A/RDH10/USP9X/PRKN	50
BP	GO:0001936	regulation of endothelial cell proliferation	32|2417	114|14725	0.00117	0.0356904	ENSG00000152661/ENSG00000128918/ENSG00000114251/ENSG00000037280/ENSG00000102755/ENSG00000138685/ENSG00000119630/ENSG00000117707/ENSG00000101445/ENSG00000081189/ENSG00000173482/ENSG00000118257/ENSG00000165757/ENSG00000117020/ENSG00000113296/ENSG00000153162/ENSG00000184304/ENSG00000000005/ENSG00000171388/ENSG00000144891/ENSG00000239697/ENSG00000100292/ENSG00000113140/ENSG00000143494/ENSG00000165197…	GJA1/ALDH1A2/WNT5A/FLT4/FLT1/FGF2/PGF/PROX1/PPP1R16B/MEF2C/PTPRM/NRP2/JCAD/AKT3/THBS4/BMP6/PRKD1/TNMD/APLN/AGTR1/TNFSF12/HMOX1/SPARC/VASH2/VEGFD/VASH1/MIR10B/SULF1/PRKCA/RGCC/SIRT1/JUN	32
BP	GO:0007494	midgut development	7|2417	12|14725	0.0011702	0.0356904	ENSG00000128602/ENSG00000128918/ENSG00000114251/ENSG00000103241/ENSG00000136160/ENSG00000176678/ENSG00000146648	SMO/ALDH1A2/WNT5A/FOXF1/EDNRB/FOXL1/EGFR	7
BP	GO:0021520	spinal cord motor neuron cell fate specification	7|2417	12|14725	0.0011702	0.0356904	ENSG00000074047/ENSG00000128710/ENSG00000016082/ENSG00000007372/ENSG00000163623/ENSG00000180818/ENSG00000159556	GLI2/HOXD10/ISL1/PAX6/NKX6-1/HOXC10/ISL2	7
BP	GO:0021542	dentate gyrus development	7|2417	12|14725	0.0011702	0.0356904	ENSG00000128602/ENSG00000138795/ENSG00000144868/ENSG00000117707/ENSG00000170370/ENSG00000112333/ENSG00000131437	SMO/LEF1/TMEM108/PROX1/EMX2/NR2E1/KIF3A	7
BP	GO:0021781	glial cell fate commitment	7|2417	12|14725	0.0011702	0.0356904	ENSG00000007372/ENSG00000205927/ENSG00000005513/ENSG00000110693/ENSG00000162367/ENSG00000125820/ENSG00000137270	PAX6/OLIG2/SOX8/SOX6/TAL1/NKX2-2/GCM1	7
BP	GO:0042693	muscle cell fate commitment	7|2417	12|14725	0.0011702	0.0356904	ENSG00000184058/ENSG00000183072/ENSG00000184937/ENSG00000081189/ENSG00000129152/ENSG00000154342/ENSG00000135111	TBX1/NKX2-5/WT1/MEF2C/MYOD1/WNT3A/TBX3	7
BP	GO:0014033	neural crest cell differentiation	21|2417	65|14725	0.001181	0.0356904	ENSG00000184058/ENSG00000128602/ENSG00000128918/ENSG00000019549/ENSG00000016082/ENSG00000138795/ENSG00000169554/ENSG00000122691/ENSG00000005513/ENSG00000180318/ENSG00000054598/ENSG00000164107/ENSG00000081189/ENSG00000075213/ENSG00000164093/ENSG00000104332/ENSG00000136160/ENSG00000176692/ENSG00000163376/ENSG00000151617/ENSG00000121039	TBX1/SMO/ALDH1A2/SNAI2/ISL1/LEF1/ZEB2/TWIST1/SOX8/ALX1/FOXC1/HAND2/MEF2C/SEMA3A/PITX2/SFRP1/EDNRB/FOXC2/KBTBD8/EDNRA/RDH10	21
BP	GO:0014855	striated muscle cell proliferation	21|2417	65|14725	0.001181	0.0356904	ENSG00000152661/ENSG00000183072/ENSG00000069702/ENSG00000138685/ENSG00000169946/ENSG00000054598/ENSG00000081189/ENSG00000154928/ENSG00000164532/ENSG00000154188/ENSG00000078900/ENSG00000143995/ENSG00000126778/ENSG00000145794/ENSG00000176692/ENSG00000138379/ENSG00000183691/ENSG00000102678/ENSG00000111087/ENSG00000151748/ENSG00000159086	GJA1/NKX2-5/TGFBR3/FGF2/ZFPM2/FOXC1/MEF2C/EPHB1/TBX20/ANGPT1/TP73/MEIS1/SIX1/MEGF10/FOXC2/MSTN/NOG/FGF9/GLI1/SAV1/PAXBP1	21
BP	GO:0051899	membrane depolarization	26|2417	87|14725	0.00122063	0.0364954	ENSG00000152661/ENSG00000145362/ENSG00000022267/ENSG00000183873/ENSG00000182389/ENSG00000148408/ENSG00000153956/ENSG00000183023/ENSG00000136531/ENSG00000143799/ENSG00000213190/ENSG00000177098/ENSG00000166257/ENSG00000101204/ENSG00000007314/ENSG00000108961/ENSG00000165995/ENSG00000182533/ENSG00000169432/ENSG00000188906/ENSG00000149575/ENSG00000153253/ENSG00000023909/ENSG00000151067/ENSG00000177606…	GJA1/ANK2/FHL1/SCN5A/CACNB4/CACNA1B/CACNA2D1/SLC8A1/SCN2A/PARP1/MLLT11/SCN4B/SCN3B/CHRNA4/SCN4A/RANGRF/CACNB2/CAV3/SCN9A/LRRK2/SCN2B/SCN3A/GCLM/CACNA1C/JUN/SCN11A	26
BP	GO:0061326	renal tubule development	26|2417	87|14725	0.00122063	0.0364954	ENSG00000147257/ENSG00000128602/ENSG00000005073/ENSG00000125931/ENSG00000103449/ENSG00000187498/ENSG00000128713/ENSG00000170577/ENSG00000138685/ENSG00000119630/ENSG00000166341/ENSG00000198914/ENSG00000005513/ENSG00000184937/ENSG00000185920/ENSG00000081189/ENSG00000104313/ENSG00000126562/ENSG00000075891/ENSG00000139292/ENSG00000146021/ENSG00000163909/ENSG00000196159/ENSG00000126778/ENSG00000183691…	GPC3/SMO/HOXA11/CITED1/SALL1/COL4A1/HOXD11/SIX2/FGF2/PGF/DCHS1/POU3F3/SOX8/WT1/PTCH1/MEF2C/EYA1/WNK4/PAX2/LGR5/KLHL3/HEYL/FAT4/SIX1/NOG/OSR1	26
BP	GO:0038084	vascular endothelial growth factor signaling pathway	12|2417	29|14725	0.00123604	0.0365673	ENSG00000156140/ENSG00000196628/ENSG00000037280/ENSG00000102755/ENSG00000054598/ENSG00000118257/ENSG00000165757/ENSG00000184304/ENSG00000020181/ENSG00000183287/ENSG00000134853/ENSG00000113721	ADAMTS3/TCF4/FLT4/FLT1/FOXC1/NRP2/JCAD/PRKD1/ADGRA2/CCBE1/PDGFRA/PDGFRB	12
BP	GO:0097484	dendrite extension	12|2417	29|14725	0.00123604	0.0365673	ENSG00000119866/ENSG00000143858/ENSG00000158321/ENSG00000144868/ENSG00000198689/ENSG00000188729/ENSG00000107295/ENSG00000112290/ENSG00000176406/ENSG00000103528/ENSG00000079841/ENSG00000185345	BCL11A/SYT2/AUTS2/TMEM108/SLC9A6/OSTN/SH3GL2/WASF1/RIMS2/SYT17/RIMS1/PRKN	12
BP	GO:0035914	skeletal muscle cell differentiation	20|2417	61|14725	0.00124907	0.0367592	ENSG00000184058/ENSG00000005513/ENSG00000148704/ENSG00000009709/ENSG00000081189/ENSG00000142700/ENSG00000154928/ENSG00000239474/ENSG00000064309/ENSG00000163909/ENSG00000003137/ENSG00000126778/ENSG00000145794/ENSG00000138379/ENSG00000129152/ENSG00000108924/ENSG00000162772/ENSG00000100201/ENSG00000154342/ENSG00000156853	TBX1/SOX8/VAX1/PAX7/MEF2C/DMRTA2/EPHB1/KLHL41/CDON/HEYL/CYP26B1/SIX1/MEGF10/MSTN/MYOD1/HLF/ATF3/DDX17/WNT3A/ZNF689	20
BP	GO:0006814	sodium ion transport	48|2417	191|14725	0.00127109	0.0372125	ENSG00000089327/ENSG00000072041/ENSG00000196632/ENSG00000183072/ENSG00000183873/ENSG00000183023/ENSG00000018236/ENSG00000164707/ENSG00000198689/ENSG00000198947/ENSG00000145248/ENSG00000126562/ENSG00000080493/ENSG00000136531/ENSG00000140090/ENSG00000180881/ENSG00000181804/ENSG00000146021/ENSG00000129244/ENSG00000135919/ENSG00000177098/ENSG00000152818/ENSG00000166257/ENSG00000137726/ENSG00000148942…	FXYD5/SLC6A15/WNK3/NKX2-5/SCN5A/SLC8A1/CNTN1/SLC13A4/SLC9A6/DMD/SLC10A4/WNK4/SLC4A4/SCN2A/SLC24A4/CAPS2/SLC9A9/KLHL3/ATP1B2/SERPINE2/SCN4B/UTRN/SCN3B/FXYD6/SLC5A12/SLC13A5/SCN4A/RANGRF/SLC5A11/CAV3/SCN9A/SLC8A3/SCN2B/SLC38A3/SCN3A/NETO2/SLC10A7/SLC38A4/SLC9A5/SLC9B2/ATP2B4/SLC9B1/SLC4A5/OSR1/ATP12A/SLC23A2/SCN11A/SLC5A3	48
BP	GO:0035051	cardiocyte differentiation	34|2417	124|14725	0.00130567	0.0380267	ENSG00000112276/ENSG00000183072/ENSG00000069702/ENSG00000016082/ENSG00000077092/ENSG00000162614/ENSG00000122691/ENSG00000183023/ENSG00000184937/ENSG00000077522/ENSG00000110693/ENSG00000117707/ENSG00000164107/ENSG00000081189/ENSG00000154639/ENSG00000164093/ENSG00000133026/ENSG00000155657/ENSG00000154556/ENSG00000149269/ENSG00000117054/ENSG00000182533/ENSG00000134853/ENSG00000153187/ENSG00000146648…	BVES/NKX2-5/TGFBR3/ISL1/RARB/NEXN/TWIST1/SLC8A1/WT1/ACTN2/SOX6/PROX1/HAND2/MEF2C/CXADR/PITX2/MYH10/TTN/SORBS2/PAK1/ACADM/CAV3/PDGFRA/HNRNPU/EGFR/FHOD3/PDGFRB/DDX39B/TBXT/WNT3A/AKAP6/PROX2/SGCB/TBX3	34
BP	GO:0010927	cellular component assembly involved in morphogenesis	27|2417	92|14725	0.00134151	0.038845	ENSG00000174607/ENSG00000145362/ENSG00000082397/ENSG00000183072/ENSG00000077522/ENSG00000117707/ENSG00000109063/ENSG00000081189/ENSG00000133026/ENSG00000155657/ENSG00000036448/ENSG00000239474/ENSG00000163531/ENSG00000128596/ENSG00000182533/ENSG00000116906/ENSG00000143632/ENSG00000163431/ENSG00000134853/ENSG00000165410/ENSG00000087053/ENSG00000134775/ENSG00000113721/ENSG00000115020/ENSG00000028839…	UGT8/ANK2/EPB41L3/NKX2-5/ACTN2/PROX1/MYH3/MEF2C/MYH10/TTN/MYOM2/KLHL41/NFASC/CCDC136/CAV3/GNPAT/ACTA1/LMOD1/PDGFRA/CFL2/MTMR2/FHOD3/PDGFRB/PIKFYVE/TBPL1/KNL1/CNTNAP1	27
BP	GO:0021988	olfactory lobe development	13|2417	33|14725	0.00134759	0.038845	ENSG00000114251/ENSG00000103449/ENSG00000185008/ENSG00000145147/ENSG00000105880/ENSG00000075213/ENSG00000115844/ENSG00000164853/ENSG00000112333/ENSG00000103494/ENSG00000188906/ENSG00000095713/ENSG00000135049	WNT5A/SALL1/ROBO2/SLIT2/DLX5/SEMA3A/DLX2/UNCX/NR2E1/RPGRIP1L/LRRK2/CRTAC1/AGTPBP1	13
BP	GO:0048732	gland development	91|2417	412|14725	0.00143642	0.0409825	ENSG00000152661/ENSG00000233276/ENSG00000170689/ENSG00000116729/ENSG00000184058/ENSG00000128602/ENSG00000106004/ENSG00000074047/ENSG00000159184/ENSG00000143869/ENSG00000105997/ENSG00000147065/ENSG00000184486/ENSG00000181690/ENSG00000128714/ENSG00000128918/ENSG00000019549/ENSG00000136630/ENSG00000114251/ENSG00000183072/ENSG00000103449/ENSG00000069702/ENSG00000016082/ENSG00000138795/ENSG00000115112…	GJA1/GPX1/HOXB9/WLS/TBX1/SMO/HOXA5/GLI2/HOXB13/GDF7/HOXA3/MSN/POU3F2/PLAG1/HOXD13/ALDH1A2/SNAI2/HLX/WNT5A/NKX2-5/SALL1/TGFBR3/ISL1/LEF1/TFCP2L1/HOXB3/CDO1/PAX6/FOXF1/WT1/HOXD9/PTCH1/SERPINF1/FOXC1/FOXB1/DKK3/PROX1/HAND2/LBH/SEMA3A/PITX2/PDX1/SFRP1/FOXE1/PAX1/ETS1/SERPINE2/INSM1/WDR35/ATM/NKX2-1/MSX1/SOSTDC1/ACADM/RPGRIP1L/APLN/RAG1/CAV3/HMOX1/SIX1/ZIC3/PDGFRA/TPH1/TNC/EDA/AK4/SIX3/NOG/GLI1/EGFR/P…	91
BP	GO:0090102	cochlea development	15|2417	41|14725	0.00143967	0.0409825	ENSG00000162738/ENSG00000184058/ENSG00000148516/ENSG00000074047/ENSG00000114251/ENSG00000105991/ENSG00000166341/ENSG00000095777/ENSG00000099954/ENSG00000104313/ENSG00000075891/ENSG00000112320/ENSG00000103494/ENSG00000126778/ENSG00000165409	VANGL2/TBX1/ZEB1/GLI2/WNT5A/HOXA1/DCHS1/MYO3A/CECR2/EYA1/PAX2/SOBP/RPGRIP1L/SIX1/TSHR	15
BP	GO:0006936	muscle contraction	71|2417	308|14725	0.00144361	0.0409825	ENSG00000152661/ENSG00000122786/ENSG00000145362/ENSG00000213949/ENSG00000182963/ENSG00000184185/ENSG00000181104/ENSG00000183072/ENSG00000183873/ENSG00000087258/ENSG00000153956/ENSG00000183023/ENSG00000081181/ENSG00000213366/ENSG00000077522/ENSG00000108984/ENSG00000198947/ENSG00000109063/ENSG00000138193/ENSG00000116741/ENSG00000157404/ENSG00000134548/ENSG00000182674/ENSG00000136160/ENSG00000155657…	GJA1/CALD1/ANK2/ITGA1/GJC1/KCNJ12/F2R/NKX2-5/SCN5A/GNAO1/CACNA2D1/SLC8A1/ARG2/GSTM2/ACTN2/MAP2K6/DMD/MYH3/PLCE1/RGS2/KIT/SPX/KCNB2/EDNRB/TTN/SCN4B/TBX20/MYOM2/KLHL41/UTRN/PRKG1/SCN3B/CHRM3/GUCY1A1/DOCK4/CALCRL/SSTR2/TRPV1/ADORA2B/SCN4A/MYOT/GRIP2/CACNB2/CAV3/SLC8A3/ACTA1/SCN2B/FKBP1B/LMOD1/DSG2/DSC2/PTGS2/SORBS1/NMUR1/PROK2/PDE4B/SNTB1/NMU/NUP155/STAC/SRI/CHRNA3/MYLK/SMPX/SULF1/VCL/CACNA1C/EDNRA/…	71
BP	GO:0042391	regulation of membrane potential	80|2417	355|14725	0.00150162	0.0424152	ENSG00000152661/ENSG00000145362/ENSG00000182963/ENSG00000112276/ENSG00000022267/ENSG00000183873/ENSG00000132429/ENSG00000145335/ENSG00000182389/ENSG00000153291/ENSG00000148408/ENSG00000153956/ENSG00000183023/ENSG00000169760/ENSG00000141682/ENSG00000144868/ENSG00000077522/ENSG00000198947/ENSG00000081189/ENSG00000154639/ENSG00000133104/ENSG00000111249/ENSG00000116329/ENSG00000136531/ENSG00000154864…	GJA1/ANK2/GJC1/BVES/FHL1/SCN5A/POPDC3/SNCA/CACNB4/SLC25A27/CACNA1B/CACNA2D1/SLC8A1/NLGN1/PMAIP1/TMEM108/ACTN2/DMD/MEF2C/CXADR/SPART/CUX2/OPRD1/SCN2A/PIEZO2/AKAP7/PARP1/MLLT11/ATP1B2/SLC26A2/SCN4B/GRID1/SCN3B/MPP2/NLGN3/TRPV1/CHRNA4/SCN4A/RIMS2/RANGRF/KCNA2/CACNB2/CAV3/SCN9A/SLC8A3/LRRK2/SCN2B/SLC26A7/FKBP1B/GRID2/DSG2/CHRFAM7A/CBLN1/BCO2/DSC2/GRIK5/CHRNA7/GRIN3A/SCN3A/GCLM/MTMR2/FMR1/NUP155/SHANK…	80
BP	GO:0003401	axis elongation	11|2417	26|14725	0.00158384	0.0442925	ENSG00000162738/ENSG00000128714/ENSG00000114251/ENSG00000140807/ENSG00000104332/ENSG00000126778/ENSG00000136158/ENSG00000041982/ENSG00000125686/ENSG00000154342/ENSG00000121039	VANGL2/HOXD13/WNT5A/NKD1/SFRP1/SIX1/SPRY2/TNC/MED1/WNT3A/RDH10	11
BP	GO:0035116	embryonic hindlimb morphogenesis	11|2417	26|14725	0.00158384	0.0442925	ENSG00000147257/ENSG00000052850/ENSG00000077092/ENSG00000122691/ENSG00000164093/ENSG00000163132/ENSG00000103494/ENSG00000109906/ENSG00000143867/ENSG00000125686/ENSG00000135111	GPC3/ALX4/RARB/TWIST1/PITX2/MSX1/RPGRIP1L/ZBTB16/OSR1/MED1/TBX3	11
BP	GO:0071229	cellular response to acid chemical	47|2417	188|14725	0.00159298	0.0443275	ENSG00000162409/ENSG00000184058/ENSG00000148516/ENSG00000197565/ENSG00000128918/ENSG00000162909/ENSG00000114251/ENSG00000187498/ENSG00000010810/ENSG00000149212/ENSG00000119866/ENSG00000132386/ENSG00000108576/ENSG00000204262/ENSG00000186469/ENSG00000104332/ENSG00000075891/ENSG00000087245/ENSG00000105996/ENSG00000062524/ENSG00000003137/ENSG00000117586/ENSG00000142156/ENSG00000122420/ENSG00000126778…	PRKAA2/TBX1/ZEB1/COL4A6/ALDH1A2/CAPN2/WNT5A/COL4A1/FYN/SESN3/BCL11A/SERPINF1/SLC6A4/COL5A2/GNG2/SFRP1/PAX2/MMP2/HOXA2/LTK/CYP26B1/TNFSF4/COL6A1/PTGFR/SIX1/IPO5/AQP1/PDGFRA/SLC38A9/RORB/HDAC2/AVPR1A/PDGFC/RRAGD/TNC/NTRK2/GCLM/EGFR/WNT10B/FZD10/TBXT/HNRNPD/OSR1/LYN/WNT3A/SIPA1/LARS	47
BP	GO:0072028	nephron morphogenesis	22|2417	71|14725	0.00168531	0.0466657	ENSG00000147257/ENSG00000128602/ENSG00000005073/ENSG00000125931/ENSG00000103449/ENSG00000128713/ENSG00000170577/ENSG00000138685/ENSG00000119630/ENSG00000166341/ENSG00000005513/ENSG00000184937/ENSG00000185920/ENSG00000104313/ENSG00000126562/ENSG00000075891/ENSG00000146021/ENSG00000196159/ENSG00000126778/ENSG00000183691/ENSG00000113721/ENSG00000143867	GPC3/SMO/HOXA11/CITED1/SALL1/HOXD11/SIX2/FGF2/PGF/DCHS1/SOX8/WT1/PTCH1/EYA1/WNK4/PAX2/KLHL3/FAT4/SIX1/NOG/PDGFRB/OSR1	22
BP	GO:0035637	multicellular organismal signaling	45|2417	179|14725	0.00175591	0.0483821	ENSG00000152661/ENSG00000166086/ENSG00000145362/ENSG00000182963/ENSG00000184185/ENSG00000183072/ENSG00000183873/ENSG00000182389/ENSG00000153956/ENSG00000183023/ENSG00000154639/ENSG00000136531/ENSG00000129244/ENSG00000177098/ENSG00000170989/ENSG00000157445/ENSG00000166257/ENSG00000137726/ENSG00000142408/ENSG00000145244/ENSG00000163531/ENSG00000007314/ENSG00000108961/ENSG00000177301/ENSG00000165995…	GJA1/JAM3/ANK2/GJC1/KCNJ12/NKX2-5/SCN5A/CACNB4/CACNA2D1/SLC8A1/CXADR/SCN2A/ATP1B2/SCN4B/S1PR1/CACNA2D3/SCN3B/FXYD6/CACNG8/CORIN/NFASC/SCN4A/RANGRF/KCNA2/CACNB2/SCN9A/SLC8A3/SCN2B/TRPC1/FKBP1B/DSG2/DSC2/AVPR1A/SCN3A/FMR1/ATP2B4/NUP155/SRI/CACNA2D2/DMRT3/CACNA1C/CNTNAP1/ASPH/KCNQ1/SCN11A	45
BP	GO:0007422	peripheral nervous system development	21|2417	67|14725	0.00181343	0.0494819	ENSG00000174607/ENSG00000184486/ENSG00000152192/ENSG00000128710/ENSG00000016082/ENSG00000005513/ENSG00000128709/ENSG00000164107/ENSG00000198947/ENSG00000006468/ENSG00000136160/ENSG00000163536/ENSG00000196569/ENSG00000163531/ENSG00000138386/ENSG00000159556/ENSG00000185668/ENSG00000148053/ENSG00000119547/ENSG00000108797/ENSG00000198743	UGT8/POU3F2/POU4F1/HOXD10/ISL1/SOX8/HOXD9/HAND2/DMD/ETV1/EDNRB/SERPINI1/LAMA2/NFASC/NAB1/ISL2/POU3F1/NTRK2/ONECUT2/CNTNAP1/SLC5A3	21
BP	GO:0072078	nephron tubule morphogenesis	21|2417	67|14725	0.00181343	0.0494819	ENSG00000147257/ENSG00000128602/ENSG00000005073/ENSG00000125931/ENSG00000103449/ENSG00000128713/ENSG00000170577/ENSG00000138685/ENSG00000119630/ENSG00000166341/ENSG00000005513/ENSG00000184937/ENSG00000185920/ENSG00000104313/ENSG00000126562/ENSG00000075891/ENSG00000146021/ENSG00000196159/ENSG00000126778/ENSG00000183691/ENSG00000143867	GPC3/SMO/HOXA11/CITED1/SALL1/HOXD11/SIX2/FGF2/PGF/DCHS1/SOX8/WT1/PTCH1/EYA1/WNK4/PAX2/KLHL3/FAT4/SIX1/NOG/OSR1	21
BP	GO:0031572	G2 DNA damage checkpoint	13|2417	34|14725	0.00185781	0.0504481	ENSG00000149948/ENSG00000160469/ENSG00000149311/ENSG00000143476/ENSG00000081377/ENSG00000020922/ENSG00000092853/ENSG00000159147/ENSG00000012048/ENSG00000184481/ENSG00000149554/ENSG00000197299/ENSG00000053254	HMGA2/BRSK1/ATM/DTL/CDC14B/MRE11/CLSPN/DONSON/BRCA1/FOXO4/CHEK1/BLM/FOXN3	13
BP	GO:0032330	regulation of chondrocyte differentiation	16|2417	46|14725	0.00187178	0.0504692	ENSG00000074047/ENSG00000005073/ENSG00000019549/ENSG00000077092/ENSG00000170577/ENSG00000178573/ENSG00000110693/ENSG00000134532/novel.261/ENSG00000168779/ENSG00000183688/ENSG00000109705/ENSG00000162878/ENSG00000153162/ENSG00000109906/ENSG00000156466	GLI2/HOXA11/SNAI2/RARB/SIX2/MAF/SOX6/SOX5/-/SHOX2/RFLNB/NKX3-2/PKDCC/BMP6/ZBTB16/GDF6	16
BP	GO:0050807	regulation of synapse organization	36|2417	136|14725	0.00188676	0.0504692	ENSG00000165300/ENSG00000170558/ENSG00000114251/ENSG00000150471/ENSG00000010810/ENSG00000131409/ENSG00000185008/ENSG00000145335/ENSG00000169760/ENSG00000135298/ENSG00000121871/ENSG00000153707/ENSG00000135333/ENSG00000081189/ENSG00000111249/ENSG00000154928/ENSG00000198908/ENSG00000197959/ENSG00000134569/ENSG00000196338/ENSG00000170396/ENSG00000077264/ENSG00000125848/ENSG00000110888/ENSG00000188906…	SLITRK5/CDH2/WNT5A/ADGRL3/FYN/LRRC4B/ROBO2/SNCA/NLGN1/ADGRB3/SLITRK3/PTPRD/EPHA7/MEF2C/CUX2/EPHB1/BHLHB9/DNM3/LRP4/NLGN3/ZNF804A/PAK3/FLRT3/CAPRIN2/LRRK2/COLQ/SIX1/GRID2/CBLN1/IL10RA/CAMK1/NTRK2/IL1RAP/NTRK1/RAPSN/NEUROD2	36
BP	GO:0022037	metencephalon development	27|2417	94|14725	0.00189999	0.0504692	ENSG00000128602/ENSG00000074047/ENSG00000128573/ENSG00000183873/ENSG00000018236/ENSG00000163064/ENSG00000198121/ENSG00000054598/ENSG00000117707/ENSG00000166165/ENSG00000129159/ENSG00000133026/ENSG00000135919/ENSG00000149269/ENSG00000180616/ENSG00000128881/ENSG00000103494/ENSG00000069667/ENSG00000116906/ENSG00000159131/ENSG00000152208/ENSG00000102924/ENSG00000117569/ENSG00000111087/ENSG00000135049…	SMO/GLI2/FOXP2/SCN5A/CNTN1/EN1/LPAR1/FOXC1/PROX1/CKB/KCNC1/MYH10/SERPINE2/PAK1/SSTR2/TTBK2/RPGRIP1L/RORA/GNPAT/GART/GRID2/CBLN1/PTBP2/GLI1/AGTPBP1/HNRNPD/NEUROD2	27
BP	GO:0021532	neural tube patterning	14|2417	38|14725	0.00190322	0.0504692	ENSG00000128602/ENSG00000074047/ENSG00000143147/ENSG00000007372/ENSG00000163064/ENSG00000185920/ENSG00000009709/ENSG00000146350/ENSG00000103494/ENSG00000131437/ENSG00000157796/ENSG00000204104/ENSG00000142875/ENSG00000154342	SMO/GLI2/GPR161/PAX6/EN1/PTCH1/PAX7/TBC1D32/RPGRIP1L/KIF3A/WDR19/TRAF3IP1/PRKACB/WNT3A	14
BP	GO:0050679	positive regulation of epithelial cell proliferation	42|2417	165|14725	0.00190348	0.0504692	ENSG00000184058/ENSG00000128602/ENSG00000128573/ENSG00000091136/ENSG00000114251/ENSG00000037280/ENSG00000183873/ENSG00000122691/ENSG00000138685/ENSG00000119630/ENSG00000006377/ENSG00000105880/ENSG00000117707/ENSG00000101445/ENSG00000104313/ENSG00000104332/ENSG00000075891/ENSG00000118257/ENSG00000165757/ENSG00000117020/ENSG00000113296/ENSG00000153162/ENSG00000184304/ENSG00000171388/ENSG00000170961…	TBX1/SMO/FOXP2/LAMB1/WNT5A/FLT4/SCN5A/TWIST1/FGF2/PGF/DLX6/DLX5/PROX1/PPP1R16B/EYA1/SFRP1/PAX2/NRP2/JCAD/AKT3/THBS4/BMP6/PRKD1/APLN/HAS2/AGTR1/TNFSF12/HMOX1/VASH2/KIF3A/VEGFD/STXBP4/NOG/FGF9/EGFR/MIR10B/OSR1/MED1/PRKCA/WNT3A/SIRT1/JUN	42
BP	GO:0060841	venous blood vessel development	8|2417	16|14725	0.0019291	0.050592	ENSG00000183072/ENSG00000103241/ENSG00000117707/ENSG00000173706/ENSG00000164093/ENSG00000164532/ENSG00000183287/ENSG00000114739	NKX2-5/FOXF1/PROX1/HEG1/PITX2/TBX20/CCBE1/ACVR2B	8
BP	GO:0090330	regulation of platelet aggregation	8|2417	16|14725	0.0019291	0.050592	ENSG00000162493/ENSG00000065675/ENSG00000135919/ENSG00000154127/ENSG00000185532/ENSG00000173918/ENSG00000254087/ENSG00000154229	PDPN/PRKCQ/SERPINE2/UBASH3B/PRKG1/C1QTNF1/LYN/PRKCA	8
BP	GO:0014031	mesenchymal cell development	20|2417	63|14725	0.00194337	0.050592	ENSG00000184058/ENSG00000128602/ENSG00000128918/ENSG00000019549/ENSG00000016082/ENSG00000138795/ENSG00000169554/ENSG00000122691/ENSG00000005513/ENSG00000180318/ENSG00000054598/ENSG00000164107/ENSG00000075213/ENSG00000164093/ENSG00000136160/ENSG00000163909/ENSG00000176692/ENSG00000163376/ENSG00000151617/ENSG00000121039	TBX1/SMO/ALDH1A2/SNAI2/ISL1/LEF1/ZEB2/TWIST1/SOX8/ALX1/FOXC1/HAND2/SEMA3A/PITX2/EDNRB/HEYL/FOXC2/KBTBD8/EDNRA/RDH10	20
BP	GO:0050803	regulation of synapse structure or activity	37|2417	141|14725	0.00194412	0.050592	ENSG00000165300/ENSG00000170558/ENSG00000114251/ENSG00000150471/ENSG00000010810/ENSG00000131409/ENSG00000185008/ENSG00000145335/ENSG00000169760/ENSG00000135298/ENSG00000121871/ENSG00000153707/ENSG00000135333/ENSG00000081189/ENSG00000111249/ENSG00000154928/ENSG00000198908/ENSG00000197959/ENSG00000134569/ENSG00000196338/ENSG00000170396/ENSG00000077264/ENSG00000125848/ENSG00000110888/ENSG00000188906…	SLITRK5/CDH2/WNT5A/ADGRL3/FYN/LRRC4B/ROBO2/SNCA/NLGN1/ADGRB3/SLITRK3/PTPRD/EPHA7/MEF2C/CUX2/EPHB1/BHLHB9/DNM3/LRP4/NLGN3/ZNF804A/PAK3/FLRT3/CAPRIN2/LRRK2/COLQ/SIX1/GRID2/CBLN1/IL10RA/CAMK1/NTRK2/SYBU/IL1RAP/NTRK1/RAPSN/NEUROD2	37
BP	GO:0048103	somatic stem cell division	10|2417	23|14725	0.00201371	0.0521617	ENSG00000147889/ENSG00000162738/ENSG00000138795/ENSG00000182742/ENSG00000134532/ENSG00000213626/ENSG00000157404/ENSG00000116641/ENSG00000066279/ENSG00000154342	CDKN2A/VANGL2/LEF1/HOXB4/SOX5/LBH/KIT/DOCK7/ASPM/WNT3A	10
BP	GO:0055007	cardiac muscle cell differentiation	28|2417	99|14725	0.0020378	0.0524754	ENSG00000112276/ENSG00000183072/ENSG00000077092/ENSG00000162614/ENSG00000183023/ENSG00000184937/ENSG00000077522/ENSG00000110693/ENSG00000117707/ENSG00000081189/ENSG00000154639/ENSG00000164093/ENSG00000133026/ENSG00000155657/ENSG00000154556/ENSG00000149269/ENSG00000117054/ENSG00000182533/ENSG00000134853/ENSG00000153187/ENSG00000134775/ENSG00000113721/ENSG00000198563/ENSG00000154342/ENSG00000151320…	BVES/NKX2-5/RARB/NEXN/SLC8A1/WT1/ACTN2/SOX6/PROX1/MEF2C/CXADR/PITX2/MYH10/TTN/SORBS2/PAK1/ACADM/CAV3/PDGFRA/HNRNPU/FHOD3/PDGFRB/DDX39B/WNT3A/AKAP6/PROX2/SGCB/TBX3	28
BP	GO:0031016	pancreas development	22|2417	72|14725	0.00205712	0.0524754	ENSG00000116729/ENSG00000128602/ENSG00000128918/ENSG00000114251/ENSG00000016082/ENSG00000007372/ENSG00000143195/ENSG00000163623/ENSG00000103241/ENSG00000117707/ENSG00000139515/ENSG00000125820/ENSG00000173404/ENSG00000109705/ENSG00000153162/ENSG00000156925/ENSG00000150907/ENSG00000114739/ENSG00000185002/ENSG00000134138/ENSG00000119547/ENSG00000284862	WLS/SMO/ALDH1A2/WNT5A/ISL1/PAX6/ILDR2/NKX6-1/FOXF1/PROX1/PDX1/NKX2-2/INSM1/NKX3-2/BMP6/ZIC3/FOXO1/ACVR2B/RFX6/MEIS2/ONECUT2/CCDC39	22
BP	GO:0014032	neural crest cell development	19|2417	59|14725	0.0020725	0.0524754	ENSG00000184058/ENSG00000128602/ENSG00000128918/ENSG00000019549/ENSG00000016082/ENSG00000138795/ENSG00000169554/ENSG00000122691/ENSG00000005513/ENSG00000180318/ENSG00000054598/ENSG00000164107/ENSG00000075213/ENSG00000164093/ENSG00000136160/ENSG00000176692/ENSG00000163376/ENSG00000151617/ENSG00000121039	TBX1/SMO/ALDH1A2/SNAI2/ISL1/LEF1/ZEB2/TWIST1/SOX8/ALX1/FOXC1/HAND2/SEMA3A/PITX2/EDNRB/FOXC2/KBTBD8/EDNRA/RDH10	19
BP	GO:0021872	forebrain generation of neurons	19|2417	59|14725	0.0020725	0.0524754	ENSG00000114251/ENSG00000103449/ENSG00000138795/ENSG00000185008/ENSG00000007372/ENSG00000176165/ENSG00000145147/ENSG00000105880/ENSG00000117707/ENSG00000075213/ENSG00000115844/ENSG00000162624/ENSG00000164853/ENSG00000119042/ENSG00000112333/ENSG00000136352/ENSG00000170390/ENSG00000066279/ENSG00000154342	WNT5A/SALL1/LEF1/ROBO2/PAX6/FOXG1/SLIT2/DLX5/PROX1/SEMA3A/DLX2/LHX8/UNCX/SATB2/NR2E1/NKX2-1/DCLK2/ASPM/WNT3A	19
BP	GO:0072091	regulation of stem cell proliferation	19|2417	59|14725	0.0020725	0.0524754	ENSG00000149948/ENSG00000128602/ENSG00000019549/ENSG00000077942/ENSG00000007372/ENSG00000176165/ENSG00000148704/ENSG00000142700/ENSG00000112333/ENSG00000207870/ENSG00000126070/ENSG00000188906/ENSG00000162946/ENSG00000141384/ENSG00000066279/ENSG00000138083/ENSG00000153187/ENSG00000104290/ENSG00000135111	HMGA2/SMO/SNAI2/FBLN1/PAX6/FOXG1/VAX1/DMRTA2/NR2E1/MIR221/AGO3/LRRK2/DISC1/TAF4B/ASPM/SIX3/HNRNPU/FZD3/TBX3	19
BP	GO:0010720	positive regulation of cell development	100|2417	465|14725	0.00212784	0.053635	ENSG00000148516/ENSG00000128602/ENSG00000074047/ENSG00000196628/ENSG00000143869/ENSG00000005073/ENSG00000166313/ENSG00000277586/ENSG00000181690/ENSG00000114251/ENSG00000183072/ENSG00000010810/ENSG00000077092/ENSG00000185008/ENSG00000169554/ENSG00000131711/ENSG00000171517/ENSG00000007372/ENSG00000176165/ENSG00000163623/ENSG00000018236/ENSG00000169760/ENSG00000143858/ENSG00000126970/ENSG00000145147…	ZEB1/SMO/GLI2/TCF4/GDF7/HOXA11/APBB1/NEFL/PLAG1/WNT5A/NKX2-5/FYN/RARB/ROBO2/ZEB2/MAP1B/LPAR3/PAX6/FOXG1/NKX6-1/CNTN1/NLGN1/SYT2/ZC4H2/SLIT2/OLIG2/SOX8/LPAR1/PTPRD/SERPINF1/PROX1/BIN1/NDNF/DMD/MEF2C/TUBB2B/SEMA3A/KIT/DMRTA2/CUX2/SHOX2/DLX2/BHLHB9/SERPINE2/SERPINI1/LRRC7/NKX2-2/PAK1/CDON/HEYL/BMP6/ZNF804A/LTK/TP73/PRKD1/MIR221/PAK3/RGMA/HAS2/RIMS2/CAPRIN2/SPEN/DISC1/FKBP1B/P3H1/SEMA6A/HDAC2/ATOH1/C…	100
BP	GO:0014841	skeletal muscle satellite cell proliferation	7|2417	13|14725	0.00217715	0.0541494	ENSG00000138685/ENSG00000154928/ENSG00000154188/ENSG00000126778/ENSG00000145794/ENSG00000138379/ENSG00000159086	FGF2/EPHB1/ANGPT1/SIX1/MEGF10/MSTN/PAXBP1	7
BP	GO:0099054	presynapse assembly	7|2417	13|14725	0.00217715	0.0541494	ENSG00000114251/ENSG00000145335/ENSG00000169760/ENSG00000153707/ENSG00000134569/ENSG00000196338/ENSG00000154342	WNT5A/SNCA/NLGN1/PTPRD/LRP4/NLGN3/WNT3A	7
BP	GO:2000291	regulation of myoblast proliferation	7|2417	13|14725	0.00217715	0.0541494	ENSG00000009709/ENSG00000164093/ENSG00000239474/ENSG00000138379/ENSG00000129152/ENSG00000134138/ENSG00000159086	PAX7/PITX2/KLHL41/MSTN/MYOD1/MEIS2/PAXBP1	7
BP	GO:0001658	branching involved in ureteric bud morphogenesis	18|2417	55|14725	0.00219719	0.054407	ENSG00000147257/ENSG00000128602/ENSG00000005073/ENSG00000125931/ENSG00000103449/ENSG00000128713/ENSG00000170577/ENSG00000138685/ENSG00000119630/ENSG00000166341/ENSG00000005513/ENSG00000184937/ENSG00000185920/ENSG00000104313/ENSG00000075891/ENSG00000196159/ENSG00000126778/ENSG00000183691	GPC3/SMO/HOXA11/CITED1/SALL1/HOXD11/SIX2/FGF2/PGF/DCHS1/SOX8/WT1/PTCH1/EYA1/PAX2/FAT4/SIX1/NOG	18
BP	GO:0003151	outflow tract morphogenesis	21|2417	68|14725	0.00222484	0.0544663	ENSG00000184058/ENSG00000114251/ENSG00000183072/ENSG00000069702/ENSG00000016082/ENSG00000077092/ENSG00000122691/ENSG00000169946/ENSG00000054598/ENSG00000164107/ENSG00000081189/ENSG00000164093/ENSG00000104313/ENSG00000118257/ENSG00000164532/ENSG00000163909/ENSG00000126778/ENSG00000176692/ENSG00000183691/ENSG00000177606/ENSG00000135111	TBX1/WNT5A/NKX2-5/TGFBR3/ISL1/RARB/TWIST1/ZFPM2/FOXC1/HAND2/MEF2C/PITX2/EYA1/NRP2/TBX20/HEYL/SIX1/FOXC2/NOG/JUN/TBX3	21
BP	GO:0021889	olfactory bulb interneuron differentiation	6|2417	10|14725	0.00223834	0.0544663	ENSG00000114251/ENSG00000103449/ENSG00000185008/ENSG00000145147/ENSG00000105880/ENSG00000164853	WNT5A/SALL1/ROBO2/SLIT2/DLX5/UNCX	6
BP	GO:0038063	collagen-activated tyrosine kinase receptor signaling pathway	6|2417	10|14725	0.00223834	0.0544663	ENSG00000134871/ENSG00000197565/ENSG00000187498/ENSG00000162733/ENSG00000188153/ENSG00000154127	COL4A2/COL4A6/COL4A1/DDR2/COL4A5/UBASH3B	6
BP	GO:0086067	AV node cell to bundle of His cell communication	6|2417	10|14725	0.00223834	0.0544663	ENSG00000182963/ENSG00000183873/ENSG00000154639/ENSG00000177098/ENSG00000165995/ENSG00000151067	GJC1/SCN5A/CXADR/SCN4B/CACNB2/CACNA1C	6
BP	GO:0006022	aminoglycan metabolic process	39|2417	152|14725	0.00232126	0.0562405	ENSG00000147257/ENSG00000038427/ENSG00000153976/ENSG00000175040/ENSG00000138685/ENSG00000111817/ENSG00000198108/ENSG00000054598/ENSG00000173376/ENSG00000183196/ENSG00000122863/ENSG00000118276/ENSG00000064225/ENSG00000154080/ENSG00000164318/ENSG00000112309/ENSG00000136542/ENSG00000144214/ENSG00000154188/ENSG00000157350/ENSG00000125430/ENSG00000085465/ENSG00000170961/ENSG00000123243/ENSG00000107742…	GPC3/VCAN/HS3ST3A1/CHST2/FGF2/DSE/CHSY3/FOXC1/NDNF/CHST6/CHST3/B4GALT6/ST3GAL6/CHST9/EGFLAM/B3GAT2/GALNT5/LYG1/ANGPT1/ST3GAL2/HS3ST3B1/OVGP1/HAS2/ITIH5/SPOCK2/PXYLP1/SLC35D1/STAB2/CSPG4/GPC5/PDGFRB/HMMR/B4GAT1/CSGALNACT2/GPC6/ITIH3/CHST4/HS6ST2/CTBS	39
BP	GO:0046620	regulation of organ growth	26|2417	91|14725	0.00247599	0.059732	ENSG00000152661/ENSG00000128602/ENSG00000136630/ENSG00000183072/ENSG00000069702/ENSG00000138685/ENSG00000169946/ENSG00000184937/ENSG00000054598/ENSG00000117707/ENSG00000108576/ENSG00000081189/ENSG00000164532/ENSG00000149269/ENSG00000078900/ENSG00000143995/ENSG00000162769/ENSG00000182533/ENSG00000176692/ENSG00000183691/ENSG00000102678/ENSG00000111087/ENSG00000198563/ENSG00000151748/ENSG00000007402…	GJA1/SMO/HLX/NKX2-5/TGFBR3/FGF2/ZFPM2/WT1/FOXC1/PROX1/SLC6A4/MEF2C/TBX20/PAK1/TP73/MEIS1/FLVCR1/CAV3/FOXC2/NOG/FGF9/GLI1/DDX39B/SAV1/CACNA2D2/AKAP6	26
BP	GO:0035050	embryonic heart tube development	22|2417	73|14725	0.00249623	0.0599628	ENSG00000152661/ENSG00000162738/ENSG00000128602/ENSG00000114251/ENSG00000183072/ENSG00000054598/ENSG00000113196/ENSG00000164107/ENSG00000138136/ENSG00000081189/ENSG00000138686/ENSG00000164532/ENSG00000139445/ENSG00000176692/ENSG00000156925/ENSG00000131437/ENSG00000204104/ENSG00000125686/ENSG00000154342/ENSG00000101752/ENSG00000284862/ENSG00000135111	GJA1/VANGL2/SMO/WNT5A/NKX2-5/FOXC1/HAND1/HAND2/LBX1/MEF2C/BBS7/TBX20/FOXN4/FOXC2/ZIC3/KIF3A/TRAF3IP1/MED1/WNT3A/MIB1/CCDC39/TBX3	22
BP	GO:0097150	neuronal stem cell population maintenance	9|2417	20|14725	0.00253068	0.0605317	ENSG00000159217/ENSG00000170558/ENSG00000117707/ENSG00000116132/ENSG00000172728/ENSG00000150907/ENSG00000066279/ENSG00000168172/ENSG00000147316	IGF2BP1/CDH2/PROX1/PRRX1/FUT10/FOXO1/ASPM/HOOK3/MCPH1	9
BP	GO:0060420	regulation of heart growth	19|2417	60|14725	0.00257413	0.0613101	ENSG00000152661/ENSG00000183072/ENSG00000069702/ENSG00000138685/ENSG00000169946/ENSG00000184937/ENSG00000117707/ENSG00000081189/ENSG00000164532/ENSG00000149269/ENSG00000078900/ENSG00000143995/ENSG00000182533/ENSG00000183691/ENSG00000102678/ENSG00000111087/ENSG00000198563/ENSG00000151748/ENSG00000151320	GJA1/NKX2-5/TGFBR3/FGF2/ZFPM2/WT1/PROX1/MEF2C/TBX20/PAK1/TP73/MEIS1/CAV3/NOG/FGF9/GLI1/DDX39B/SAV1/AKAP6	19
BP	GO:0001935	endothelial cell proliferation	34|2417	129|14725	0.00267811	0.0635175	ENSG00000152661/ENSG00000128918/ENSG00000114251/ENSG00000037280/ENSG00000102755/ENSG00000138685/ENSG00000119630/ENSG00000117707/ENSG00000101445/ENSG00000081189/ENSG00000173482/ENSG00000118257/ENSG00000165757/ENSG00000117020/ENSG00000113296/ENSG00000153162/ENSG00000184304/ENSG00000000005/ENSG00000171388/ENSG00000144891/ENSG00000239697/ENSG00000164619/ENSG00000100292/ENSG00000113140/ENSG00000143494…	GJA1/ALDH1A2/WNT5A/FLT4/FLT1/FGF2/PGF/PROX1/PPP1R16B/MEF2C/PTPRM/NRP2/JCAD/AKT3/THBS4/BMP6/PRKD1/TNMD/APLN/AGTR1/TNFSF12/BMPER/HMOX1/SPARC/VASH2/VEGFD/CD34/VASH1/MIR10B/SULF1/PRKCA/RGCC/SIRT1/JUN	34
BP	GO:0001570	vasculogenesis	21|2417	69|14725	0.00271239	0.0637923	ENSG00000164683/ENSG00000126016/ENSG00000128602/ENSG00000182963/ENSG00000125931/ENSG00000183072/ENSG00000069702/ENSG00000103241/ENSG00000169946/ENSG00000184937/ENSG00000173706/ENSG00000164093/ENSG00000131477/ENSG00000166292/ENSG00000174842/ENSG00000170961/ENSG00000148053/ENSG00000174059/ENSG00000113721/ENSG00000164458/ENSG00000112531	HEY1/AMOT/SMO/GJC1/CITED1/NKX2-5/TGFBR3/FOXF1/ZFPM2/WT1/HEG1/PITX2/RAMP2/TMEM100/GLMN/HAS2/NTRK2/CD34/PDGFRB/TBXT/QKI	21
BP	GO:0072088	nephron epithelium morphogenesis	21|2417	69|14725	0.00271239	0.0637923	ENSG00000147257/ENSG00000128602/ENSG00000005073/ENSG00000125931/ENSG00000103449/ENSG00000128713/ENSG00000170577/ENSG00000138685/ENSG00000119630/ENSG00000166341/ENSG00000005513/ENSG00000184937/ENSG00000185920/ENSG00000104313/ENSG00000126562/ENSG00000075891/ENSG00000146021/ENSG00000196159/ENSG00000126778/ENSG00000183691/ENSG00000143867	GPC3/SMO/HOXA11/CITED1/SALL1/HOXD11/SIX2/FGF2/PGF/DCHS1/SOX8/WT1/PTCH1/EYA1/WNK4/PAX2/KLHL3/FAT4/SIX1/NOG/OSR1	21
BP	GO:0050673	epithelial cell proliferation	76|2417	342|14725	0.00286415	0.0670809	ENSG00000152661/ENSG00000233276/ENSG00000147257/ENSG00000184058/ENSG00000128602/ENSG00000106004/ENSG00000128573/ENSG00000091136/ENSG00000128918/ENSG00000019549/ENSG00000114251/ENSG00000037280/ENSG00000069702/ENSG00000016082/ENSG00000102755/ENSG00000183873/ENSG00000007372/ENSG00000122691/ENSG00000163623/ENSG00000138685/ENSG00000119630/ENSG00000006377/ENSG00000185920/ENSG00000132386/ENSG00000105880…	GJA1/GPX1/GPC3/TBX1/SMO/HOXA5/FOXP2/LAMB1/ALDH1A2/SNAI2/WNT5A/FLT4/TGFBR3/ISL1/FLT1/SCN5A/PAX6/TWIST1/NKX6-1/FGF2/PGF/DLX6/PTCH1/SERPINF1/DLX5/INTU/PROX1/PPP1R16B/MEF2C/EYA1/KIT/PTPRM/SFRP1/PAX2/LGR5/NRP2/EDNRB/CD109/JCAD/AKT3/THBS4/BMP6/PRKD1/TNMD/APLN/HAS2/AGTR1/TNFSF12/BMPER/HMOX1/SIX1/SPARC/VASH2/KIF3A/VEGFD/CD34/STXBP4/NOG/FGF9/GLI1/EGFR/VASH1/WNT10B/BIRC5/SAV1/MIR10B/NKX2-8/SULF1/OSR1/MED1/…	76
BP	GO:0050954	sensory perception of mechanical stimulus	37|2417	144|14725	0.00288132	0.0672028	ENSG00000233276/ENSG00000079215/ENSG00000184058/ENSG00000019549/ENSG00000144488/ENSG00000010810/ENSG00000105991/ENSG00000185483/ENSG00000135903/ENSG00000166402/ENSG00000105928/ENSG00000112319/ENSG00000107736/ENSG00000095777/ENSG00000006611/ENSG00000104313/ENSG00000157404/ENSG00000154864/ENSG00000135919/ENSG00000139219/ENSG00000112320/ENSG00000188162/ENSG00000196689/ENSG00000104321/ENSG00000100473…	GPX1/SLC1A3/TBX1/SNAI2/ESPNL/FYN/HOXA1/ROR1/PAX3/TUB/GSDME/EYA4/CDH23/MYO3A/USH1C/EYA1/KIT/PIEZO2/SERPINE2/COL2A1/SOBP/OTOG/TRPV1/TRPA1/COCH/SIX1/PGAP1/SPRY2/DNM1/MYO1A/NTRK1/BIRC5/TMIE/SLC26A4/PJVK/PDZD7/KCNQ1	37
BP	GO:0051965	positive regulation of synapse assembly	17|2417	52|14725	0.00291902	0.0678009	ENSG00000165300/ENSG00000150471/ENSG00000131409/ENSG00000169760/ENSG00000135298/ENSG00000121871/ENSG00000153707/ENSG00000111249/ENSG00000154928/ENSG00000198908/ENSG00000196338/ENSG00000125848/ENSG00000152208/ENSG00000102924/ENSG00000148053/ENSG00000196083/ENSG00000198400	SLITRK5/ADGRL3/LRRC4B/NLGN1/ADGRB3/SLITRK3/PTPRD/CUX2/EPHB1/BHLHB9/NLGN3/FLRT3/GRID2/CBLN1/NTRK2/IL1RAP/NTRK1	17
BP	GO:0001508	action potential	33|2417	125|14725	0.00298031	0.0689396	ENSG00000152661/ENSG00000145362/ENSG00000182963/ENSG00000183873/ENSG00000148408/ENSG00000153956/ENSG00000183023/ENSG00000198947/ENSG00000154639/ENSG00000136531/ENSG00000118507/ENSG00000177098/ENSG00000166257/ENSG00000101204/ENSG00000007314/ENSG00000108961/ENSG00000177301/ENSG00000165995/ENSG00000182533/ENSG00000169432/ENSG00000149575/ENSG00000119782/ENSG00000046604/ENSG00000134755/ENSG00000153253…	GJA1/ANK2/GJC1/SCN5A/CACNA1B/CACNA2D1/SLC8A1/DMD/CXADR/SCN2A/AKAP7/SCN4B/SCN3B/CHRNA4/SCN4A/RANGRF/KCNA2/CACNB2/CAV3/SCN9A/SCN2B/FKBP1B/DSG2/DSC2/SCN3A/FMR1/NUP155/SRI/CACNA1C/AKAP6/CNTNAP1/KCNQ1/SCN11A	33
BP	GO:0021879	forebrain neuron differentiation	16|2417	48|14725	0.00307566	0.0702253	ENSG00000114251/ENSG00000103449/ENSG00000138795/ENSG00000185008/ENSG00000007372/ENSG00000176165/ENSG00000145147/ENSG00000105880/ENSG00000117707/ENSG00000075213/ENSG00000115844/ENSG00000162624/ENSG00000164853/ENSG00000119042/ENSG00000136352/ENSG00000170390	WNT5A/SALL1/LEF1/ROBO2/PAX6/FOXG1/SLIT2/DLX5/PROX1/SEMA3A/DLX2/LHX8/UNCX/SATB2/NKX2-1/DCLK2	16
BP	GO:0061383	trabecula morphogenesis	16|2417	48|14725	0.00307566	0.0702253	ENSG00000164683/ENSG00000138829/ENSG00000154734/ENSG00000183072/ENSG00000069702/ENSG00000138449/ENSG00000173706/ENSG00000104332/ENSG00000087245/ENSG00000170989/ENSG00000182533/ENSG00000155846/ENSG00000135766/ENSG00000183691/ENSG00000169884/ENSG00000125686	HEY1/FBN2/ADAMTS1/NKX2-5/TGFBR3/SLC40A1/HEG1/SFRP1/MMP2/S1PR1/CAV3/PPARGC1B/EGLN1/NOG/WNT10B/MED1	16
BP	GO:0060078	regulation of postsynaptic membrane potential	27|2417	97|14725	0.00310553	0.0702253	ENSG00000145335/ENSG00000183023/ENSG00000169760/ENSG00000144868/ENSG00000081189/ENSG00000111249/ENSG00000182771/ENSG00000108852/ENSG00000196338/ENSG00000196689/ENSG00000101204/ENSG00000176406/ENSG00000100678/ENSG00000188906/ENSG00000152208/ENSG00000166664/ENSG00000102924/ENSG00000105737/ENSG00000175344/ENSG00000198785/ENSG00000087053/ENSG00000161681/ENSG00000101489/ENSG00000079841/ENSG00000080644…	SNCA/SLC8A1/NLGN1/TMEM108/MEF2C/CUX2/GRID1/MPP2/NLGN3/TRPV1/CHRNA4/RIMS2/SLC8A3/LRRK2/GRID2/CHRFAM7A/CBLN1/GRIK5/CHRNA7/GRIN3A/MTMR2/SHANK1/CELF4/RIMS1/CHRNA3/GRIA4/GRIK4	27
BP	GO:0048557	embryonic digestive tract morphogenesis	8|2417	17|14725	0.00312335	0.0702253	ENSG00000136630/ENSG00000170577/ENSG00000103241/ENSG00000081059/ENSG00000164093/ENSG00000168779/ENSG00000134853/ENSG00000166831	HLX/SIX2/FOXF1/TCF7/PITX2/SHOX2/PDGFRA/RBPMS2	8
BP	GO:0051450	myoblast proliferation	8|2417	17|14725	0.00312335	0.0702253	ENSG00000233276/ENSG00000009709/ENSG00000164093/ENSG00000239474/ENSG00000138379/ENSG00000129152/ENSG00000134138/ENSG00000159086	GPX1/PAX7/PITX2/KLHL41/MSTN/MYOD1/MEIS2/PAXBP1	8
BP	GO:0060973	cell migration involved in heart development	8|2417	17|14725	0.00312335	0.0702253	ENSG00000112276/ENSG00000019549/ENSG00000122691/ENSG00000166341/ENSG00000164107/ENSG00000164093/ENSG00000125848/ENSG00000113721	BVES/SNAI2/TWIST1/DCHS1/HAND2/PITX2/FLRT3/PDGFRB	8
BP	GO:2001014	regulation of skeletal muscle cell differentiation	8|2417	17|14725	0.00312335	0.0702253	ENSG00000184058/ENSG00000081189/ENSG00000154928/ENSG00000239474/ENSG00000003137/ENSG00000126778/ENSG00000138379/ENSG00000100201	TBX1/MEF2C/EPHB1/KLHL41/CYP26B1/SIX1/MSTN/DDX17	8
BP	GO:0048864	stem cell development	19|2417	61|14725	0.00317356	0.0707881	ENSG00000184058/ENSG00000128602/ENSG00000128918/ENSG00000019549/ENSG00000016082/ENSG00000138795/ENSG00000169554/ENSG00000122691/ENSG00000005513/ENSG00000180318/ENSG00000054598/ENSG00000164107/ENSG00000075213/ENSG00000164093/ENSG00000136160/ENSG00000176692/ENSG00000163376/ENSG00000151617/ENSG00000121039	TBX1/SMO/ALDH1A2/SNAI2/ISL1/LEF1/ZEB2/TWIST1/SOX8/ALX1/FOXC1/HAND2/SEMA3A/PITX2/EDNRB/FOXC2/KBTBD8/EDNRA/RDH10	19
BP	GO:0072171	mesonephric tubule morphogenesis	19|2417	61|14725	0.00317356	0.0707881	ENSG00000147257/ENSG00000128602/ENSG00000005073/ENSG00000125931/ENSG00000103449/ENSG00000128713/ENSG00000170577/ENSG00000138685/ENSG00000119630/ENSG00000166341/ENSG00000005513/ENSG00000184937/ENSG00000185920/ENSG00000104313/ENSG00000075891/ENSG00000196159/ENSG00000126778/ENSG00000183691/ENSG00000143867	GPC3/SMO/HOXA11/CITED1/SALL1/HOXD11/SIX2/FGF2/PGF/DCHS1/SOX8/WT1/PTCH1/EYA1/PAX2/FAT4/SIX1/NOG/OSR1	19
BP	GO:0019827	stem cell population maintenance	37|2417	145|14725	0.00326975	0.0726454	ENSG00000159217/ENSG00000149948/ENSG00000170558/ENSG00000134744/ENSG00000162738/ENSG00000128602/ENSG00000103449/ENSG00000165556/ENSG00000170577/ENSG00000138685/ENSG00000119715/ENSG00000117707/ENSG00000187140/ENSG00000213626/ENSG00000157404/ENSG00000104332/ENSG00000075891/ENSG00000138336/ENSG00000162367/ENSG00000116132/ENSG00000112333/ENSG00000143033/ENSG00000198730/ENSG00000172728/ENSG00000156925…	IGF2BP1/HMGA2/CDH2/ZCCHC11/VANGL2/SMO/SALL1/CDX2/SIX2/FGF2/ESRRB/PROX1/FOXD3/LBH/KIT/SFRP1/PAX2/TET1/TAL1/PRRX1/NR2E1/MTF2/CTR9/FUT10/ZIC3/FOXO1/NKAP/POU5F1/ASPM/HOOK3/NOG/SAV1/GNL3/SMC3/SMC1A/MCPH1/TBX3	37
BP	GO:0001656	metanephros development	23|2417	79|14725	0.00329405	0.0728971	ENSG00000147257/ENSG00000128602/ENSG00000005073/ENSG00000125931/ENSG00000103449/ENSG00000185008/ENSG00000170577/ENSG00000198914/ENSG00000005513/ENSG00000184937/ENSG00000185920/ENSG00000104313/ENSG00000077943/ENSG00000075891/ENSG00000196159/ENSG00000126778/ENSG00000176692/ENSG00000134853/ENSG00000174059/ENSG00000113721/ENSG00000143867/ENSG00000166147/ENSG00000121039	GPC3/SMO/HOXA11/CITED1/SALL1/ROBO2/SIX2/POU3F3/SOX8/WT1/PTCH1/EYA1/ITGA8/PAX2/FAT4/SIX1/FOXC2/PDGFRA/CD34/PDGFRB/OSR1/FBN1/RDH10	23
BP	GO:0035850	epithelial cell differentiation involved in kidney development	14|2417	40|14725	0.00330914	0.0729438	ENSG00000128602/ENSG00000125931/ENSG00000103449/ENSG00000170577/ENSG00000184937/ENSG00000163884/ENSG00000081189/ENSG00000075891/ENSG00000196159/ENSG00000176692/ENSG00000151490/ENSG00000174059/ENSG00000143867/ENSG00000102900	SMO/CITED1/SALL1/SIX2/WT1/KLF15/MEF2C/PAX2/FAT4/FOXC2/PTPRO/CD34/OSR1/NUP93	14
BP	GO:0048488	synaptic vesicle endocytosis	12|2417	32|14725	0.0033311	0.073141	ENSG00000145335/ENSG00000169760/ENSG00000143858/ENSG00000197959/ENSG00000107295/ENSG00000102003/ENSG00000196338/ENSG00000188906/ENSG00000106976/ENSG00000205726/ENSG00000132718/ENSG00000159082	SNCA/NLGN1/SYT2/DNM3/SH3GL2/SYP/NLGN3/LRRK2/DNM1/ITSN1/SYT11/SYNJ1	12
BP	GO:0002062	chondrocyte differentiation	26|2417	93|14725	0.00343632	0.0751577	ENSG00000149948/ENSG00000074047/ENSG00000005073/ENSG00000019549/ENSG00000077092/ENSG00000170577/ENSG00000178573/ENSG00000110693/ENSG00000134532/novel.261/ENSG00000081189/ENSG00000168779/ENSG00000139219/ENSG00000183688/ENSG00000109705/ENSG00000162878/ENSG00000153162/ENSG00000243696/ENSG00000109906/ENSG00000156466/ENSG00000196739/ENSG00000102678/ENSG00000169884/ENSG00000248592/ENSG00000137573/ENSG0…	HMGA2/GLI2/HOXA11/SNAI2/RARB/SIX2/MAF/SOX6/SOX5/-/MEF2C/SHOX2/COL2A1/RFLNB/NKX3-2/PKDCC/BMP6/AC006254.1/ZBTB16/GDF6/COL27A1/FGF9/WNT10B/TMEM110-MUSTN1/SULF1/OSR1	26
BP	GO:0072080	nephron tubule development	24|2417	84|14725	0.00355723	0.0775008	ENSG00000147257/ENSG00000128602/ENSG00000005073/ENSG00000125931/ENSG00000103449/ENSG00000128713/ENSG00000170577/ENSG00000138685/ENSG00000119630/ENSG00000166341/ENSG00000198914/ENSG00000005513/ENSG00000184937/ENSG00000185920/ENSG00000081189/ENSG00000104313/ENSG00000126562/ENSG00000075891/ENSG00000146021/ENSG00000163909/ENSG00000196159/ENSG00000126778/ENSG00000183691/ENSG00000143867	GPC3/SMO/HOXA11/CITED1/SALL1/HOXD11/SIX2/FGF2/PGF/DCHS1/POU3F3/SOX8/WT1/PTCH1/MEF2C/EYA1/WNK4/PAX2/KLHL3/HEYL/FAT4/SIX1/NOG/OSR1	24
BP	GO:0060411	cardiac septum morphogenesis	20|2417	66|14725	0.00357826	0.077658	ENSG00000164683/ENSG00000162738/ENSG00000184058/ENSG00000128602/ENSG00000114251/ENSG00000183072/ENSG00000069702/ENSG00000016082/ENSG00000077092/ENSG00000169946/ENSG00000117707/ENSG00000113196/ENSG00000164093/ENSG00000118257/ENSG00000164532/ENSG00000163909/ENSG00000135766/ENSG00000183691/ENSG00000151748/ENSG00000135111	HEY1/VANGL2/TBX1/SMO/WNT5A/NKX2-5/TGFBR3/ISL1/RARB/ZFPM2/PROX1/HAND1/PITX2/NRP2/TBX20/HEYL/EGLN1/NOG/SAV1/TBX3	20
BP	GO:0051146	striated muscle cell differentiation	56|2417	241|14725	0.00360691	0.0779786	ENSG00000154277/ENSG00000233276/ENSG00000170558/ENSG00000128591/ENSG00000184058/ENSG00000128602/ENSG00000162909/ENSG00000112276/ENSG00000183072/ENSG00000077092/ENSG00000138795/ENSG00000162614/ENSG00000183023/ENSG00000135298/ENSG00000184937/ENSG00000077522/ENSG00000110693/ENSG00000117707/ENSG00000198947/ENSG00000109063/ENSG00000081189/ENSG00000154639/ENSG00000164093/ENSG00000168779/ENSG00000133026…	UCHL1/GPX1/CDH2/FLNC/TBX1/SMO/CAPN2/BVES/NKX2-5/RARB/LEF1/NEXN/SLC8A1/ADGRB3/WT1/ACTN2/SOX6/PROX1/DMD/MYH3/MEF2C/CXADR/PITX2/SHOX2/MYH10/TTN/MYOM2/SORBS2/KLHL41/PAK1/CDON/MSX1/ACADM/HDAC9/CYP26B1/CAV3/PLPP7/ACTA1/LMOD1/PDGFRA/CFL2/AVPR1A/MYOD1/MORF4L2/HNRNPU/WNT10B/FHOD3/PDGFRB/DDX39B/CACNA2D2/PTCD2/WNT3A/AKAP6/PROX2/SGCB/TBX3	56
BP	GO:0014856	skeletal muscle cell proliferation	7|2417	14|14725	0.00374087	0.0799522	ENSG00000138685/ENSG00000154928/ENSG00000154188/ENSG00000126778/ENSG00000145794/ENSG00000138379/ENSG00000159086	FGF2/EPHB1/ANGPT1/SIX1/MEGF10/MSTN/PAXBP1	7
BP	GO:0045986	negative regulation of smooth muscle contraction	7|2417	14|14725	0.00374087	0.0799522	ENSG00000116741/ENSG00000185532/ENSG00000164116/ENSG00000128512/ENSG00000064989/ENSG00000170425/ENSG00000073756	RGS2/PRKG1/GUCY1A1/DOCK4/CALCRL/ADORA2B/PTGS2	7
BP	GO:0060831	smoothened signaling pathway involved in dorsal/ventral neural tube patterning	7|2417	14|14725	0.00374087	0.0799522	ENSG00000074047/ENSG00000143147/ENSG00000185920/ENSG00000146350/ENSG00000157796/ENSG00000204104/ENSG00000142875	GLI2/GPR161/PTCH1/TBC1D32/WDR19/TRAF3IP1/PRKACB	7
BP	GO:0007263	nitric oxide mediated signal transduction	9|2417	21|14725	0.00379029	0.080082	ENSG00000007171/ENSG00000061918/ENSG00000173376/ENSG00000139515/ENSG00000164116/ENSG00000153904/ENSG00000146648/ENSG00000058668/ENSG00000213722	NOS2/GUCY1B1/NDNF/PDX1/GUCY1A1/DDAH1/EGFR/ATP2B4/DDAH2	9
BP	GO:0071709	membrane assembly	9|2417	21|14725	0.00379029	0.080082	ENSG00000170558/ENSG00000161249/ENSG00000169760/ENSG00000153707/ENSG00000110076/ENSG00000134569/ENSG00000196338/ENSG00000111450/ENSG00000182533	CDH2/DMKN/NLGN1/PTPRD/NRXN2/LRP4/NLGN3/STX2/CAV3	9
BP	GO:2000679	positive regulation of transcription regulatory region DNA binding	9|2417	21|14725	0.00379029	0.080082	ENSG00000149948/ENSG00000152192/ENSG00000122691/ENSG00000054598/ENSG00000164107/ENSG00000143799/ENSG00000121236/ENSG00000137947/ENSG00000154342	HMGA2/POU4F1/TWIST1/FOXC1/HAND2/PARP1/TRIM6/GTF2B/WNT3A	9
BP	GO:0008016	regulation of heart contraction	50|2417	211|14725	0.00380393	0.080082	ENSG00000152661/ENSG00000145362/ENSG00000182963/ENSG00000112276/ENSG00000184185/ENSG00000183072/ENSG00000183873/ENSG00000087258/ENSG00000182389/ENSG00000148408/ENSG00000153956/ENSG00000183023/ENSG00000213366/ENSG00000198947/ENSG00000154639/ENSG00000075213/ENSG00000116741/ENSG00000048740/ENSG00000134548/ENSG00000129244/ENSG00000177098/ENSG00000157445/ENSG00000166257/ENSG00000137726/ENSG00000106688…	GJA1/ANK2/GJC1/BVES/KCNJ12/NKX2-5/SCN5A/GNAO1/CACNB4/CACNA1B/CACNA2D1/SLC8A1/GSTM2/DMD/CXADR/SEMA3A/RGS2/CELF2/SPX/ATP1B2/SCN4B/CACNA2D3/SCN3B/FXYD6/SLC1A1/CACNG8/CORIN/APLN/FOXN4/RANGRF/CACNB2/CAV3/SLC8A3/SCN2B/TRPC1/FKBP1B/DSG2/DSC2/AVPR1A/CHRNA7/PDE4B/NMU/ATP2B4/NUP155/SRI/CACNA2D2/CACNA1C/CLIC2/ASPH/KCNQ1	50
BP	GO:1903522	regulation of blood circulation	58|2417	252|14725	0.00386214	0.0805787	ENSG00000152661/ENSG00000145362/ENSG00000182963/ENSG00000112276/ENSG00000184185/ENSG00000181104/ENSG00000183072/ENSG00000183873/ENSG00000087258/ENSG00000182389/ENSG00000148408/ENSG00000153956/ENSG00000183023/ENSG00000213366/ENSG00000198947/ENSG00000154639/ENSG00000075213/ENSG00000116741/ENSG00000048740/ENSG00000134548/ENSG00000129244/ENSG00000177098/ENSG00000157445/ENSG00000166257/ENSG00000133019…	GJA1/ANK2/GJC1/BVES/KCNJ12/F2R/NKX2-5/SCN5A/GNAO1/CACNB4/CACNA1B/CACNA2D1/SLC8A1/GSTM2/DMD/CXADR/SEMA3A/RGS2/CELF2/SPX/ATP1B2/SCN4B/CACNA2D3/SCN3B/CHRM3/FXYD6/DOCK4/SLC1A1/CACNG8/CORIN/APLN/FOXN4/AGTR1/RANGRF/CACNB2/CAV3/SLC8A3/SCN2B/TRPC1/FKBP1B/DSG2/DSC2/PTGS2/AVPR1A/CHRNA7/PDE4B/TBXAS1/UTS2R/EGFR/NMU/ATP2B4/NUP155/SRI/CACNA2D2/CACNA1C/CLIC2/ASPH/KCNQ1	58
BP	GO:0043523	regulation of neuron apoptotic process	45|2417	186|14725	0.00387721	0.0805787	ENSG00000233276/ENSG00000213949/ENSG00000277586/ENSG00000125931/ENSG00000152192/ENSG00000181104/ENSG00000010810/ENSG00000016082/ENSG00000145335/ENSG00000163064/ENSG00000147955/ENSG00000171956/ENSG00000173376/ENSG00000135333/ENSG00000081189/ENSG00000143799/ENSG00000198908/ENSG00000149311/ENSG00000154188/ENSG00000132821/ENSG00000078900/ENSG00000077264/ENSG00000107859/ENSG00000164778/ENSG00000122756…	GPX1/ITGA1/NEFL/CITED1/POU4F1/F2R/FYN/ISL1/SNCA/EN1/SIGMAR1/FOXB1/NDNF/EPHA7/MEF2C/PARP1/BHLHB9/ATM/ANGPT1/VSTM2L/TP73/PAK3/PITX3/EN2/CNTFR/SLC30A10/HMOX1/SIX1/GRID2/GRIK5/ITSN1/SNCB/NAE1/CNTF/NTRK2/GCLM/UNC5B/NTRK1/BIRC5/RAPSN/TRIM2/JUN/PRKN/CTSZ/MSH2	45
BP	GO:0061371	determination of heart left/right asymmetry	19|2417	62|14725	0.00388486	0.0805787	ENSG00000152661/ENSG00000162738/ENSG00000128602/ENSG00000114251/ENSG00000183072/ENSG00000113196/ENSG00000164107/ENSG00000138136/ENSG00000081189/ENSG00000138686/ENSG00000164532/ENSG00000139445/ENSG00000156925/ENSG00000131437/ENSG00000164458/ENSG00000154342/ENSG00000101752/ENSG00000284862/ENSG00000135111	GJA1/VANGL2/SMO/WNT5A/NKX2-5/HAND1/HAND2/LBX1/MEF2C/BBS7/TBX20/FOXN4/ZIC3/KIF3A/TBXT/WNT3A/MIB1/CCDC39/TBX3	19
BP	GO:0086001	cardiac muscle cell action potential	19|2417	62|14725	0.00388486	0.0805787	ENSG00000152661/ENSG00000145362/ENSG00000182963/ENSG00000183873/ENSG00000153956/ENSG00000183023/ENSG00000198947/ENSG00000154639/ENSG00000177098/ENSG00000166257/ENSG00000108961/ENSG00000165995/ENSG00000182533/ENSG00000149575/ENSG00000046604/ENSG00000134755/ENSG00000113569/ENSG00000151067/ENSG00000053918	GJA1/ANK2/GJC1/SCN5A/CACNA2D1/SLC8A1/DMD/CXADR/SCN4B/SCN3B/RANGRF/CACNB2/CAV3/SCN2B/DSG2/DSC2/NUP155/CACNA1C/KCNQ1	19
BP	GO:0048640	negative regulation of developmental growth	23|2417	80|14725	0.0039194	0.080996	ENSG00000152661/ENSG00000114251/ENSG00000119866/ENSG00000185920/ENSG00000108576/ENSG00000140807/ENSG00000135333/ENSG00000075213/ENSG00000188729/ENSG00000133104/ENSG00000104332/ENSG00000010319/ENSG00000149269/ENSG00000095587/ENSG00000078900/ENSG00000069482/ENSG00000182175/ENSG00000143995/ENSG00000182533/ENSG00000138379/ENSG00000183691/ENSG00000151748/ENSG00000154342	GJA1/WNT5A/BCL11A/PTCH1/SLC6A4/NKD1/EPHA7/SEMA3A/OSTN/SPART/SFRP1/SEMA3G/PAK1/TLL2/TP73/GAL/RGMA/MEIS1/CAV3/MSTN/NOG/SAV1/WNT3A	23
BP	GO:0030203	glycosaminoglycan metabolic process	37|2417	147|14725	0.00418234	0.084689	ENSG00000147257/ENSG00000038427/ENSG00000153976/ENSG00000175040/ENSG00000138685/ENSG00000111817/ENSG00000198108/ENSG00000054598/ENSG00000173376/ENSG00000183196/ENSG00000122863/ENSG00000118276/ENSG00000064225/ENSG00000154080/ENSG00000164318/ENSG00000112309/ENSG00000136542/ENSG00000144214/ENSG00000154188/ENSG00000157350/ENSG00000125430/ENSG00000170961/ENSG00000123243/ENSG00000107742/ENSG00000155893…	GPC3/VCAN/HS3ST3A1/CHST2/FGF2/DSE/CHSY3/FOXC1/NDNF/CHST6/CHST3/B4GALT6/ST3GAL6/CHST9/EGFLAM/B3GAT2/GALNT5/LYG1/ANGPT1/ST3GAL2/HS3ST3B1/HAS2/ITIH5/SPOCK2/PXYLP1/SLC35D1/STAB2/CSPG4/GPC5/PDGFRB/HMMR/B4GAT1/CSGALNACT2/GPC6/ITIH3/CHST4/HS6ST2	37
BP	GO:0098727	maintenance of cell number	37|2417	147|14725	0.00418234	0.084689	ENSG00000159217/ENSG00000149948/ENSG00000170558/ENSG00000134744/ENSG00000162738/ENSG00000128602/ENSG00000103449/ENSG00000165556/ENSG00000170577/ENSG00000138685/ENSG00000119715/ENSG00000117707/ENSG00000187140/ENSG00000213626/ENSG00000157404/ENSG00000104332/ENSG00000075891/ENSG00000138336/ENSG00000162367/ENSG00000116132/ENSG00000112333/ENSG00000143033/ENSG00000198730/ENSG00000172728/ENSG00000156925…	IGF2BP1/HMGA2/CDH2/ZCCHC11/VANGL2/SMO/SALL1/CDX2/SIX2/FGF2/ESRRB/PROX1/FOXD3/LBH/KIT/SFRP1/PAX2/TET1/TAL1/PRRX1/NR2E1/MTF2/CTR9/FUT10/ZIC3/FOXO1/NKAP/POU5F1/ASPM/HOOK3/NOG/SAV1/GNL3/SMC3/SMC1A/MCPH1/TBX3	37
BP	GO:0002027	regulation of heart rate	24|2417	85|14725	0.00420114	0.084689	ENSG00000145362/ENSG00000112276/ENSG00000183873/ENSG00000153956/ENSG00000183023/ENSG00000198947/ENSG00000075213/ENSG00000134548/ENSG00000177098/ENSG00000166257/ENSG00000106688/ENSG00000108961/ENSG00000165995/ENSG00000182533/ENSG00000149575/ENSG00000119782/ENSG00000046604/ENSG00000134755/ENSG00000166148/ENSG00000175344/ENSG00000109255/ENSG00000075142/ENSG00000151067/ENSG00000053918	ANK2/BVES/SCN5A/CACNA2D1/SLC8A1/DMD/SEMA3A/SPX/SCN4B/SCN3B/SLC1A1/RANGRF/CACNB2/CAV3/SCN2B/FKBP1B/DSG2/DSC2/AVPR1A/CHRNA7/NMU/SRI/CACNA1C/KCNQ1	24
BP	GO:0060419	heart growth	24|2417	85|14725	0.00420114	0.084689	ENSG00000152661/ENSG00000183072/ENSG00000069702/ENSG00000138685/ENSG00000169946/ENSG00000184937/ENSG00000054598/ENSG00000117707/ENSG00000081189/ENSG00000173706/ENSG00000170989/ENSG00000164532/ENSG00000154556/ENSG00000149269/ENSG00000078900/ENSG00000143995/ENSG00000182533/ENSG00000176692/ENSG00000183691/ENSG00000102678/ENSG00000111087/ENSG00000198563/ENSG00000151748/ENSG00000151320	GJA1/NKX2-5/TGFBR3/FGF2/ZFPM2/WT1/FOXC1/PROX1/MEF2C/HEG1/S1PR1/TBX20/SORBS2/PAK1/TP73/MEIS1/CAV3/FOXC2/NOG/FGF9/GLI1/DDX39B/SAV1/AKAP6	24
BP	GO:0060993	kidney morphogenesis	24|2417	85|14725	0.00420114	0.084689	ENSG00000147257/ENSG00000162738/ENSG00000128602/ENSG00000005073/ENSG00000125931/ENSG00000103449/ENSG00000128713/ENSG00000170577/ENSG00000138685/ENSG00000119630/ENSG00000166341/ENSG00000005513/ENSG00000184937/ENSG00000185920/ENSG00000104313/ENSG00000126562/ENSG00000075891/ENSG00000146021/ENSG00000196159/ENSG00000188906/ENSG00000126778/ENSG00000183691/ENSG00000113721/ENSG00000143867	GPC3/VANGL2/SMO/HOXA11/CITED1/SALL1/HOXD11/SIX2/FGF2/PGF/DCHS1/SOX8/WT1/PTCH1/EYA1/WNK4/PAX2/KLHL3/FAT4/LRRK2/SIX1/NOG/PDGFRB/OSR1	24
BP	GO:0001947	heart looping	18|2417	58|14725	0.00420356	0.084689	ENSG00000152661/ENSG00000162738/ENSG00000128602/ENSG00000114251/ENSG00000183072/ENSG00000113196/ENSG00000164107/ENSG00000138136/ENSG00000081189/ENSG00000138686/ENSG00000164532/ENSG00000139445/ENSG00000156925/ENSG00000131437/ENSG00000154342/ENSG00000101752/ENSG00000284862/ENSG00000135111	GJA1/VANGL2/SMO/WNT5A/NKX2-5/HAND1/HAND2/LBX1/MEF2C/BBS7/TBX20/FOXN4/ZIC3/KIF3A/WNT3A/MIB1/CCDC39/TBX3	18
BP	GO:0007588	excretion	18|2417	58|14725	0.00420356	0.084689	ENSG00000183853/ENSG00000198914/ENSG00000144061/ENSG00000134548/ENSG00000136160/ENSG00000196689/ENSG00000145244/ENSG00000170425/ENSG00000144891/ENSG00000100292/ENSG00000166148/ENSG00000181408/ENSG00000138075/ENSG00000171365/ENSG00000080644/ENSG00000151704/ENSG00000143921/ENSG00000086159	KIRREL1/POU3F3/NPHP1/SPX/EDNRB/TRPV1/CORIN/ADORA2B/AGTR1/HMOX1/AVPR1A/UTS2R/ABCG5/CLCN5/CHRNA3/KCNJ1/ABCG8/AQP6	18
BP	GO:0021527	spinal cord association neuron differentiation	6|2417	11|14725	0.00424264	0.0848678	ENSG00000143869/ENSG00000138136/ENSG00000009709/ENSG00000162367/ENSG00000112139/ENSG00000154342	GDF7/LBX1/PAX7/TAL1/MDGA1/WNT3A	6
BP	GO:0060536	cartilage morphogenesis	6|2417	11|14725	0.00424264	0.0848678	ENSG00000106004/ENSG00000019549/ENSG00000113196/ENSG00000164107/ENSG00000081189/ENSG00000163132	HOXA5/SNAI2/HAND1/HAND2/MEF2C/MSX1	6
BP	GO:0031076	embryonic camera-type eye development	13|2417	37|14725	0.00440963	0.087585	ENSG00000148516/ENSG00000128918/ENSG00000114251/ENSG00000137273/ENSG00000007372/ENSG00000122691/ENSG00000117707/ENSG00000164093/ENSG00000075891/ENSG00000138083/ENSG00000157796/ENSG00000204104/ENSG00000121039	ZEB1/ALDH1A2/WNT5A/FOXF2/PAX6/TWIST1/PROX1/PITX2/PAX2/SIX3/WDR19/TRAF3IP1/RDH10	13
BP	GO:0060412	ventricular septum morphogenesis	13|2417	37|14725	0.00440963	0.087585	ENSG00000164683/ENSG00000162738/ENSG00000114251/ENSG00000183072/ENSG00000069702/ENSG00000169946/ENSG00000117707/ENSG00000164093/ENSG00000163909/ENSG00000135766/ENSG00000183691/ENSG00000151748/ENSG00000135111	HEY1/VANGL2/WNT5A/NKX2-5/TGFBR3/ZFPM2/PROX1/PITX2/HEYL/EGLN1/NOG/SAV1/TBX3	13
BP	GO:0021761	limbic system development	25|2417	90|14725	0.00445904	0.0879447	ENSG00000128602/ENSG00000277586/ENSG00000184486/ENSG00000138795/ENSG00000169554/ENSG00000144868/ENSG00000171956/ENSG00000117707/ENSG00000145242/ENSG00000075213/ENSG00000164093/ENSG00000115844/ENSG00000134954/ENSG00000170370/ENSG00000112333/ENSG00000136352/ENSG00000170390/ENSG00000131437/ENSG00000058668/ENSG00000168389/ENSG00000172201/ENSG00000154342/ENSG00000149557/ENSG00000070785/ENSG00000135111	SMO/NEFL/POU3F2/LEF1/ZEB2/TMEM108/FOXB1/PROX1/EPHA5/SEMA3A/PITX2/DLX2/ETS1/EMX2/NR2E1/NKX2-1/DCLK2/KIF3A/ATP2B4/MFSD2A/ID4/WNT3A/FEZ1/EIF2B3/TBX3	25
BP	GO:0060079	excitatory postsynaptic potential	25|2417	90|14725	0.00445904	0.0879447	ENSG00000145335/ENSG00000169760/ENSG00000144868/ENSG00000081189/ENSG00000111249/ENSG00000182771/ENSG00000108852/ENSG00000196338/ENSG00000196689/ENSG00000101204/ENSG00000176406/ENSG00000188906/ENSG00000152208/ENSG00000166664/ENSG00000102924/ENSG00000105737/ENSG00000175344/ENSG00000198785/ENSG00000087053/ENSG00000161681/ENSG00000101489/ENSG00000079841/ENSG00000080644/ENSG00000152578/ENSG00000149403	SNCA/NLGN1/TMEM108/MEF2C/CUX2/GRID1/MPP2/NLGN3/TRPV1/CHRNA4/RIMS2/LRRK2/GRID2/CHRFAM7A/CBLN1/GRIK5/CHRNA7/GRIN3A/MTMR2/SHANK1/CELF4/RIMS1/CHRNA3/GRIA4/GRIK4	25
BP	GO:0006939	smooth muscle contraction	26|2417	95|14725	0.00469321	0.0921851	ENSG00000181104/ENSG00000183023/ENSG00000138193/ENSG00000116741/ENSG00000157404/ENSG00000134548/ENSG00000182674/ENSG00000136160/ENSG00000185532/ENSG00000133019/ENSG00000164116/ENSG00000128512/ENSG00000064989/ENSG00000180616/ENSG00000196689/ENSG00000170425/ENSG00000144596/ENSG00000119782/ENSG00000073756/ENSG00000171596/ENSG00000163421/ENSG00000109255/ENSG00000080644/ENSG00000065534/ENSG00000137573…	F2R/SLC8A1/PLCE1/RGS2/KIT/SPX/KCNB2/EDNRB/PRKG1/CHRM3/GUCY1A1/DOCK4/CALCRL/SSTR2/TRPV1/ADORA2B/GRIP2/FKBP1B/PTGS2/NMUR1/PROK2/NMU/CHRNA3/MYLK/SULF1/EDNRA	26
BP	GO:0001704	formation of primary germ layer	30|2417	114|14725	0.00472029	0.0921851	ENSG00000149948/ENSG00000134871/ENSG00000116729/ENSG00000005073/ENSG00000091136/ENSG00000114251/ENSG00000138795/ENSG00000115232/ENSG00000170577/ENSG00000103241/ENSG00000054598/ENSG00000113196/ENSG00000204262/ENSG00000104313/ENSG00000077943/ENSG00000075891/ENSG00000087245/ENSG00000162367/ENSG00000164532/ENSG00000142156/ENSG00000198730/ENSG00000176692/ENSG00000204531/ENSG00000183691/ENSG00000161638…	HMGA2/COL4A2/WLS/HOXA11/LAMB1/WNT5A/LEF1/ITGA4/SIX2/FOXF1/FOXC1/HAND1/COL5A2/EYA1/ITGA8/PAX2/MMP2/TAL1/TBX20/COL6A1/CTR9/FOXC2/POU5F1/NOG/ITGA5/LAMA3/TBXT/SOX7/WNT3A/COL8A1	30
BP	GO:0048708	astrocyte differentiation	19|2417	63|14725	0.00472324	0.0921851	ENSG00000050555/ENSG00000128602/ENSG00000184486/ENSG00000185483/ENSG00000007372/ENSG00000005513/ENSG00000110693/ENSG00000136717/ENSG00000134198/ENSG00000135919/ENSG00000162367/ENSG00000125820/ENSG00000112333/ENSG00000169071/ENSG00000137270/ENSG00000242689/ENSG00000183691/ENSG00000146648/ENSG00000172201	LAMC3/SMO/POU3F2/ROR1/PAX6/SOX8/SOX6/BIN1/TSPAN2/SERPINE2/TAL1/NKX2-2/NR2E1/ROR2/GCM1/CNTF/NOG/EGFR/ID4	19
BP	GO:1901214	regulation of neuron death	61|2417	270|14725	0.00481209	0.0928049	ENSG00000233276/ENSG00000213949/ENSG00000277586/ENSG00000125931/ENSG00000152192/ENSG00000114251/ENSG00000181104/ENSG00000010810/ENSG00000016082/ENSG00000145335/ENSG00000163064/ENSG00000147955/ENSG00000132386/ENSG00000171956/ENSG00000173376/ENSG00000135333/ENSG00000081189/ENSG00000154928/ENSG00000143799/ENSG00000198908/ENSG00000162877/ENSG00000149311/ENSG00000154188/ENSG00000132821/ENSG00000078900…	GPX1/ITGA1/NEFL/CITED1/POU4F1/WNT5A/F2R/FYN/ISL1/SNCA/EN1/SIGMAR1/SERPINF1/FOXB1/NDNF/EPHA7/MEF2C/EPHB1/PARP1/BHLHB9/PM20D1/ATM/ANGPT1/VSTM2L/TP73/TLR6/PAK3/PITX3/PPARA/EN2/CNTFR/LRRK2/SLC30A10/HMOX1/SIX1/GRID2/GRIK5/ITSN1/SNCB/EGLN1/CHRNA7/NAE1/CNTF/TP53BP2/NTRK2/GCLM/SARM1/CD34/UNC5B/CBL/NTRK1/BIRC5/GPR75/RAPSN/WNT3A/TRIM2/SIRT1/JUN/PRKN/CTSZ/MSH2	61
BP	GO:0033002	muscle cell proliferation	42|2417	173|14725	0.00481745	0.0928049	ENSG00000085662/ENSG00000152661/ENSG00000084207/ENSG00000183072/ENSG00000069702/ENSG00000138685/ENSG00000125257/ENSG00000169946/ENSG00000054598/ENSG00000081189/ENSG00000154928/ENSG00000087245/ENSG00000145604/ENSG00000170989/ENSG00000164532/ENSG00000185532/ENSG00000149269/ENSG00000154188/ENSG00000064989/ENSG00000078900/ENSG00000207870/ENSG00000171388/ENSG00000143995/ENSG00000168811/ENSG00000100292…	AKR1B1/GJA1/GSTP1/NKX2-5/TGFBR3/FGF2/ABCC4/ZFPM2/FOXC1/MEF2C/EPHB1/MMP2/SKP2/S1PR1/TBX20/PRKG1/PAK1/ANGPT1/CALCRL/TP73/MIR221/APLN/MEIS1/IL12A/HMOX1/SIX1/MEGF10/FOXC2/PTGS2/MSTN/NOX1/NOG/FGF9/GLI1/EGFR/PRKDC/PDGFRB/DDX39B/SAV1/PAXBP1/RBPMS2/JUN	42
BP	GO:0032288	myelin assembly	8|2417	18|14725	0.00482103	0.0928049	ENSG00000174607/ENSG00000145362/ENSG00000082397/ENSG00000163531/ENSG00000116906/ENSG00000087053/ENSG00000115020/ENSG00000108797	UGT8/ANK2/EPB41L3/NFASC/GNPAT/MTMR2/PIKFYVE/CNTNAP1	8
BP	GO:1901018	positive regulation of potassium ion transmembrane transporter activity	8|2417	18|14725	0.00482103	0.0928049	ENSG00000145362/ENSG00000077522/ENSG00000129159/ENSG00000118507/ENSG00000129244/ENSG00000069482/ENSG00000175548/ENSG00000151320	ANK2/ACTN2/KCNC1/AKAP7/ATP1B2/GAL/ALG10B/AKAP6	8
BP	GO:0060688	regulation of morphogenesis of a branching structure	16|2417	50|14725	0.00485633	0.0928483	ENSG00000128602/ENSG00000128714/ENSG00000019549/ENSG00000114251/ENSG00000119866/ENSG00000170577/ENSG00000119630/ENSG00000005513/ENSG00000104332/ENSG00000075891/ENSG00000168779/ENSG00000182533/ENSG00000188906/ENSG00000126778/ENSG00000183691/ENSG00000137573	SMO/HOXD13/SNAI2/WNT5A/BCL11A/SIX2/PGF/SOX8/SFRP1/PAX2/SHOX2/CAV3/LRRK2/SIX1/NOG/SULF1	16
BP	GO:0061005	cell differentiation involved in kidney development	16|2417	50|14725	0.00485633	0.0928483	ENSG00000128602/ENSG00000125931/ENSG00000103449/ENSG00000170577/ENSG00000198914/ENSG00000184937/ENSG00000163884/ENSG00000185920/ENSG00000081189/ENSG00000075891/ENSG00000196159/ENSG00000176692/ENSG00000151490/ENSG00000174059/ENSG00000143867/ENSG00000102900	SMO/CITED1/SALL1/SIX2/POU3F3/WT1/KLF15/PTCH1/MEF2C/PAX2/FAT4/FOXC2/PTPRO/CD34/OSR1/NUP93	16
BP	GO:0045666	positive regulation of neuron differentiation	71|2417	323|14725	0.00507723	0.0967427	ENSG00000148516/ENSG00000074047/ENSG00000196628/ENSG00000143869/ENSG00000166313/ENSG00000277586/ENSG00000114251/ENSG00000183072/ENSG00000010810/ENSG00000077092/ENSG00000185008/ENSG00000169554/ENSG00000131711/ENSG00000171517/ENSG00000176165/ENSG00000163623/ENSG00000018236/ENSG00000169760/ENSG00000143858/ENSG00000126970/ENSG00000145147/ENSG00000198121/ENSG00000153707/ENSG00000132386/ENSG00000117707…	ZEB1/GLI2/TCF4/GDF7/APBB1/NEFL/WNT5A/NKX2-5/FYN/RARB/ROBO2/ZEB2/MAP1B/LPAR3/FOXG1/NKX6-1/CNTN1/NLGN1/SYT2/ZC4H2/SLIT2/LPAR1/PTPRD/SERPINF1/PROX1/NDNF/DMD/MEF2C/TUBB2B/CUX2/SHOX2/DLX2/BHLHB9/SERPINI1/LRRC7/NKX2-2/PAK1/CDON/HEYL/BMP6/ZNF804A/LTK/PRKD1/MIR221/PAK3/RGMA/RIMS2/CAPRIN2/FKBP1B/P3H1/ATOH1/CAMK1/GDF6/CNTF/NTRK2/SYT17/FMR1/ALKAL1/IL1RAP/RUFY3/NTRK1/SHANK1/PLXNC1/RIMS1/HOXD3/LYN/WNT3A/NEURO…	71
BP	GO:0035924	cellular response to vascular endothelial growth factor stimulus	15|2417	46|14725	0.00517317	0.0975785	ENSG00000156140/ENSG00000196628/ENSG00000180447/ENSG00000037280/ENSG00000102755/ENSG00000054598/ENSG00000118257/ENSG00000131477/ENSG00000165757/ENSG00000184304/ENSG00000020181/ENSG00000183287/ENSG00000134853/ENSG00000113721/ENSG00000210741	ADAMTS3/TCF4/GAS1/FLT4/FLT1/FOXC1/NRP2/RAMP2/JCAD/PRKD1/ADGRA2/CCBE1/PDGFRA/PDGFRB/MIR196A1	15
BP	GO:0086002	cardiac muscle cell action potential involved in contraction	15|2417	46|14725	0.00517317	0.0975785	ENSG00000152661/ENSG00000145362/ENSG00000182963/ENSG00000183873/ENSG00000153956/ENSG00000177098/ENSG00000166257/ENSG00000165995/ENSG00000182533/ENSG00000149575/ENSG00000046604/ENSG00000134755/ENSG00000113569/ENSG00000151067/ENSG00000053918	GJA1/ANK2/GJC1/SCN5A/CACNA2D1/SCN4B/SCN3B/CACNB2/CAV3/SCN2B/DSG2/DSC2/NUP155/CACNA1C/KCNQ1	15
BP	GO:2000677	regulation of transcription regulatory region DNA binding	15|2417	46|14725	0.00517317	0.0975785	ENSG00000149948/ENSG00000164683/ENSG00000152192/ENSG00000122691/ENSG00000054598/ENSG00000113196/ENSG00000164107/ENSG00000143799/ENSG00000121236/ENSG00000163132/ENSG00000186951/ENSG00000184828/ENSG00000075142/ENSG00000137947/ENSG00000154342	HMGA2/HEY1/POU4F1/TWIST1/FOXC1/HAND1/HAND2/PARP1/TRIM6/MSX1/PPARA/ZBTB7C/SRI/GTF2B/WNT3A	15
BP	GO:0003205	cardiac chamber development	37|2417	149|14725	0.0053028	0.0996892	ENSG00000164683/ENSG00000162738/ENSG00000154734/ENSG00000184058/ENSG00000145362/ENSG00000128602/ENSG00000152192/ENSG00000114251/ENSG00000183072/ENSG00000103449/ENSG00000069702/ENSG00000016082/ENSG00000077092/ENSG00000183873/ENSG00000103241/ENSG00000099139/ENSG00000169946/ENSG00000054598/ENSG00000117707/ENSG00000113196/ENSG00000164107/ENSG00000081189/ENSG00000173706/ENSG00000164093/ENSG00000168779…	HEY1/VANGL2/ADAMTS1/TBX1/ANK2/SMO/POU4F1/WNT5A/NKX2-5/SALL1/TGFBR3/ISL1/RARB/SCN5A/FOXF1/PCSK5/ZFPM2/FOXC1/PROX1/HAND1/HAND2/MEF2C/HEG1/PITX2/SHOX2/NRP2/MYH10/TBX20/HEYL/CAV3/FOXC2/EGLN1/NOG/SAV1/PTCD2/MED1/TBX3	37
BP	GO:0034765	regulation of ion transmembrane transport	81|2417	377|14725	0.00545133	0.10188	ENSG00000152661/ENSG00000089327/ENSG00000145362/ENSG00000196730/ENSG00000196632/ENSG00000022267/ENSG00000184185/ENSG00000181104/ENSG00000010810/ENSG00000183873/ENSG00000145335/ENSG00000182389/ENSG00000185760/ENSG00000122691/ENSG00000148408/ENSG00000153956/ENSG00000183023/ENSG00000169760/ENSG00000213366/ENSG00000077522/ENSG00000116396/ENSG00000198947/ENSG00000085563/ENSG00000081189/ENSG00000136531…	GJA1/FXYD5/ANK2/DAPK1/WNK3/FHL1/KCNJ12/F2R/FYN/SCN5A/SNCA/CACNB4/KCNQ5/TWIST1/CACNA1B/CACNA2D1/SLC8A1/NLGN1/GSTM2/ACTN2/KCNC4/DMD/ABCB1/MEF2C/SCN2A/KCNC1/KCNB2/AKAP7/ATP1B2/CD19/SCN4B/UBASH3B/KCNQ2/KCNA3/UTRN/CACNA2D3/SCN3B/FXYD6/CACNG8/PM20D1/NLGN3/PRKD1/GAL/GALNT8/SCN4A/RANGRF/KCNA2/CACNB2/KCNG3/CAV3/SCN9A/SCN2B/TRPC1/GOPC/FKBP1B/XCL1/CHRFAM7A/NIPSNAP2/SCN3A/NETO2/PDE4B/NOX1/FMR1/KCNAB1/ATP2B4/…	81
BP	GO:0007095	mitotic G2 DNA damage checkpoint	9|2417	22|14725	0.00549182	0.10188	ENSG00000149948/ENSG00000160469/ENSG00000149311/ENSG00000020922/ENSG00000092853/ENSG00000159147/ENSG00000184481/ENSG00000197299/ENSG00000053254	HMGA2/BRSK1/ATM/MRE11/CLSPN/DONSON/FOXO4/BLM/FOXN3	9
BP	GO:0060384	innervation	9|2417	22|14725	0.00549182	0.10188	ENSG00000152192/ENSG00000016082/ENSG00000188517/ENSG00000075213/ENSG00000135919/ENSG00000141622/ENSG00000171246/ENSG00000198400/ENSG00000137573	POU4F1/ISL1/COL25A1/SEMA3A/SERPINE2/RNF165/NPTX1/NTRK1/SULF1	9
BP	GO:0072202	cell differentiation involved in metanephros development	9|2417	22|14725	0.00549182	0.10188	ENSG00000128602/ENSG00000125931/ENSG00000103449/ENSG00000170577/ENSG00000198914/ENSG00000075891/ENSG00000196159/ENSG00000174059/ENSG00000143867	SMO/CITED1/SALL1/SIX2/POU3F3/PAX2/FAT4/CD34/OSR1	9
BP	GO:0035150	regulation of tube size	31|2417	120|14725	0.00553292	0.101969	ENSG00000152661/ENSG00000233276/ENSG00000169860/ENSG00000213949/ENSG00000181104/ENSG00000183023/ENSG00000007171/ENSG00000054598/ENSG00000108576/ENSG00000116741/ENSG00000173482/ENSG00000136160/ENSG00000185532/ENSG00000133019/ENSG00000118965/ENSG00000164116/ENSG00000128512/ENSG00000170425/ENSG00000171388/ENSG00000144596/ENSG00000144891/ENSG00000100292/ENSG00000133636/ENSG00000176692/ENSG00000073756…	GJA1/GPX1/P2RY1/ITGA1/F2R/SLC8A1/NOS2/FOXC1/SLC6A4/RGS2/PTPRM/EDNRB/PRKG1/CHRM3/WDR35/GUCY1A1/DOCK4/ADORA2B/APLN/GRIP2/AGTR1/HMOX1/NTS/FOXC2/PTGS2/AVPR1A/GCLM/TBXAS1/UTS2R/EGFR/EDNRA	31
BP	GO:0050880	regulation of blood vessel size	31|2417	120|14725	0.00553292	0.101969	ENSG00000152661/ENSG00000233276/ENSG00000169860/ENSG00000213949/ENSG00000181104/ENSG00000183023/ENSG00000007171/ENSG00000054598/ENSG00000108576/ENSG00000116741/ENSG00000173482/ENSG00000136160/ENSG00000185532/ENSG00000133019/ENSG00000118965/ENSG00000164116/ENSG00000128512/ENSG00000170425/ENSG00000171388/ENSG00000144596/ENSG00000144891/ENSG00000100292/ENSG00000133636/ENSG00000176692/ENSG00000073756…	GJA1/GPX1/P2RY1/ITGA1/F2R/SLC8A1/NOS2/FOXC1/SLC6A4/RGS2/PTPRM/EDNRB/PRKG1/CHRM3/WDR35/GUCY1A1/DOCK4/ADORA2B/APLN/GRIP2/AGTR1/HMOX1/NTS/FOXC2/PTGS2/AVPR1A/GCLM/TBXAS1/UTS2R/EGFR/EDNRA	31
BP	GO:0055021	regulation of cardiac muscle tissue growth	17|2417	55|14725	0.00557321	0.102376	ENSG00000152661/ENSG00000183072/ENSG00000069702/ENSG00000138685/ENSG00000169946/ENSG00000081189/ENSG00000164532/ENSG00000149269/ENSG00000078900/ENSG00000143995/ENSG00000182533/ENSG00000183691/ENSG00000102678/ENSG00000111087/ENSG00000198563/ENSG00000151748/ENSG00000151320	GJA1/NKX2-5/TGFBR3/FGF2/ZFPM2/MEF2C/TBX20/PAK1/TP73/MEIS1/CAV3/NOG/FGF9/GLI1/DDX39B/SAV1/AKAP6	17
BP	GO:0051402	neuron apoptotic process	49|2417	210|14725	0.00567937	0.103924	ENSG00000233276/ENSG00000213949/ENSG00000277586/ENSG00000125931/ENSG00000152192/ENSG00000181104/ENSG00000010810/ENSG00000016082/ENSG00000091592/ENSG00000145335/ENSG00000163064/ENSG00000147955/ENSG00000171956/ENSG00000173376/ENSG00000135333/ENSG00000081189/ENSG00000136531/ENSG00000143799/ENSG00000198908/ENSG00000120868/ENSG00000149311/ENSG00000154188/ENSG00000132821/ENSG00000078900/ENSG00000077264…	GPX1/ITGA1/NEFL/CITED1/POU4F1/F2R/FYN/ISL1/NLRP1/SNCA/EN1/SIGMAR1/FOXB1/NDNF/EPHA7/MEF2C/SCN2A/PARP1/BHLHB9/APAF1/ATM/ANGPT1/VSTM2L/TP73/PAK3/PITX3/EN2/CNTFR/SLC30A10/HMOX1/SIX1/GRID2/GRIK5/ITSN1/SNCB/NAE1/CNTF/NTRK2/GCLM/UNC5B/POLB/NTRK1/BIRC5/RAPSN/TRIM2/JUN/PRKN/CTSZ/MSH2	49
BP	GO:0003208	cardiac ventricle morphogenesis	19|2417	64|14725	0.00570499	0.103924	ENSG00000164683/ENSG00000152192/ENSG00000183072/ENSG00000069702/ENSG00000016082/ENSG00000103241/ENSG00000169946/ENSG00000054598/ENSG00000117707/ENSG00000113196/ENSG00000164107/ENSG00000081189/ENSG00000173706/ENSG00000164532/ENSG00000163909/ENSG00000176692/ENSG00000183691/ENSG00000049883/ENSG00000125686	HEY1/POU4F1/NKX2-5/TGFBR3/ISL1/FOXF1/ZFPM2/FOXC1/PROX1/HAND1/HAND2/MEF2C/HEG1/TBX20/HEYL/FOXC2/NOG/PTCD2/MED1	19
BP	GO:0048483	autonomic nervous system development	13|2417	38|14725	0.00571297	0.103924	ENSG00000184058/ENSG00000136630/ENSG00000005513/ENSG00000164107/ENSG00000075213/ENSG00000118257/ENSG00000136160/ENSG00000173404/ENSG00000173917/ENSG00000126778/ENSG00000198400/ENSG00000151617/ENSG00000104290	TBX1/HLX/SOX8/HAND2/SEMA3A/NRP2/EDNRB/INSM1/HOXB2/SIX1/NTRK1/EDNRA/FZD3	13
BP	GO:0090257	regulation of muscle system process	46|2417	195|14725	0.00583452	0.104843	ENSG00000145362/ENSG00000181104/ENSG00000183072/ENSG00000183873/ENSG00000183023/ENSG00000213366/ENSG00000164107/ENSG00000198947/ENSG00000138193/ENSG00000116741/ENSG00000157404/ENSG00000134548/ENSG00000182674/ENSG00000143799/ENSG00000138741/ENSG00000152818/ENSG00000185532/ENSG00000133019/ENSG00000164116/ENSG00000128512/ENSG00000149269/ENSG00000064989/ENSG00000180616/ENSG00000170425/ENSG00000108961…	ANK2/F2R/NKX2-5/SCN5A/SLC8A1/GSTM2/HAND2/DMD/PLCE1/RGS2/KIT/SPX/KCNB2/PARP1/TRPC3/UTRN/PRKG1/CHRM3/GUCY1A1/DOCK4/PAK1/CALCRL/SSTR2/ADORA2B/RANGRF/CAV3/SLC8A3/FKBP1B/DSG2/DSC2/FOXO1/PTGS2/MSTN/PDE9A/PROK2/PDE4B/NMU/ATP2B4/DDX39B/SRI/CHRNA3/CACNA1C/PRKCA/CLIC2/AKAP6/KCNQ1	46
BP	GO:0044091	membrane biogenesis	10|2417	26|14725	0.0058381	0.104843	ENSG00000170558/ENSG00000161249/ENSG00000169760/ENSG00000153707/ENSG00000110076/ENSG00000134569/ENSG00000196338/ENSG00000111450/ENSG00000182533/ENSG00000034693	CDH2/DMKN/NLGN1/PTPRD/NRXN2/LRP4/NLGN3/STX2/CAV3/PEX3	10
BP	GO:0060571	morphogenesis of an epithelial fold	10|2417	26|14725	0.0058381	0.104843	ENSG00000074047/ENSG00000143869/ENSG00000128714/ENSG00000114251/ENSG00000099954/ENSG00000171243/ENSG00000183691/ENSG00000146648/ENSG00000137573/ENSG00000121039	GLI2/GDF7/HOXD13/WNT5A/CECR2/SOSTDC1/NOG/EGFR/SULF1/RDH10	10
BP	GO:0061900	glial cell activation	10|2417	26|14725	0.0058381	0.104843	ENSG00000128602/ENSG00000145335/ENSG00000149311/ENSG00000174130/ENSG00000196689/ENSG00000188906/ENSG00000242689/ENSG00000146648/ENSG00000184599/ENSG00000177606	SMO/SNCA/ATM/TLR6/TRPV1/LRRK2/CNTF/EGFR/FAM19A3/JUN	10
BP	GO:0044818	mitotic G2/M transition checkpoint	11|2417	30|14725	0.00594605	0.106442	ENSG00000149948/ENSG00000160469/ENSG00000149311/ENSG00000159593/ENSG00000020922/ENSG00000092853/ENSG00000159147/ENSG00000012048/ENSG00000184481/ENSG00000197299/ENSG00000053254	HMGA2/BRSK1/ATM/NAE1/MRE11/CLSPN/DONSON/BRCA1/FOXO4/BLM/FOXN3	11
BP	GO:1904018	positive regulation of vasculature development	39|2417	160|14725	0.0059866	0.106828	ENSG00000149948/ENSG00000114251/ENSG00000016082/ENSG00000102755/ENSG00000122691/ENSG00000138685/ENSG00000166501/ENSG00000119630/ENSG00000116761/ENSG00000101445/ENSG00000157404/ENSG00000101017/ENSG00000134954/ENSG00000131477/ENSG00000166292/ENSG00000165757/ENSG00000117020/ENSG00000112333/ENSG00000184304/ENSG00000048052/ENSG00000124212/ENSG00000144891/ENSG00000239697/ENSG00000153904/ENSG00000183287…	HMGA2/WNT5A/ISL1/FLT1/TWIST1/FGF2/PRKCB/PGF/CTH/PPP1R16B/KIT/CD40/ETS1/RAMP2/TMEM100/JCAD/AKT3/NR2E1/PRKD1/HDAC9/PTGIS/AGTR1/TNFSF12/DDAH1/CCBE1/HMOX1/FOXC2/VASH2/AQP1/PTGS2/CHRNA7/VEGFD/CD34/ITGA5/UTS2R/BRCA1/MIR10B/PRKCA/SIRT1	39
BP	GO:0099172	presynapse organization	7|2417	15|14725	0.00602908	0.107245	ENSG00000114251/ENSG00000145335/ENSG00000169760/ENSG00000153707/ENSG00000134569/ENSG00000196338/ENSG00000154342	WNT5A/SNCA/NLGN1/PTPRD/LRP4/NLGN3/WNT3A	7
BP	GO:0019233	sensory perception of pain	22|2417	78|14725	0.00605323	0.107335	ENSG00000154277/ENSG00000169860/ENSG00000120068/ENSG00000181104/ENSG00000010810/ENSG00000196549/ENSG00000116329/ENSG00000134548/ENSG00000154928/ENSG00000136160/ENSG00000166292/ENSG00000166257/ENSG00000196689/ENSG00000101204/ENSG00000104321/ENSG00000177301/ENSG00000169432/ENSG00000073756/ENSG00000163421/ENSG00000109255/ENSG00000198400/ENSG00000168356	UCHL1/P2RY1/HOXB8/F2R/FYN/MME/OPRD1/SPX/EPHB1/EDNRB/TMEM100/SCN3B/TRPV1/CHRNA4/TRPA1/KCNA2/SCN9A/PTGS2/PROK2/NMU/NTRK1/SCN11A	22
BP	GO:0060675	ureteric bud morphogenesis	18|2417	60|14725	0.00623844	0.110271	ENSG00000147257/ENSG00000128602/ENSG00000005073/ENSG00000125931/ENSG00000103449/ENSG00000128713/ENSG00000170577/ENSG00000138685/ENSG00000119630/ENSG00000166341/ENSG00000005513/ENSG00000184937/ENSG00000185920/ENSG00000104313/ENSG00000075891/ENSG00000196159/ENSG00000126778/ENSG00000183691	GPC3/SMO/HOXA11/CITED1/SALL1/HOXD11/SIX2/FGF2/PGF/DCHS1/SOX8/WT1/PTCH1/EYA1/PAX2/FAT4/SIX1/NOG	18
BP	GO:0048593	camera-type eye morphogenesis	26|2417	97|14725	0.00631303	0.11124	ENSG00000148516/ENSG00000177707/ENSG00000114251/ENSG00000137273/ENSG00000007372/ENSG00000122691/ENSG00000005513/ENSG00000117707/ENSG00000164093/ENSG00000173482/ENSG00000075891/ENSG00000154928/ENSG00000064309/ENSG00000113966/ENSG00000107859/ENSG00000143995/ENSG00000139445/ENSG00000069188/ENSG00000106025/ENSG00000180376/ENSG00000198963/ENSG00000138083/ENSG00000157890/ENSG00000119608/ENSG00000095464…	ZEB1/NECTIN3/WNT5A/FOXF2/PAX6/TWIST1/SOX8/PROX1/PITX2/PTPRM/PAX2/EPHB1/CDON/ARL6/PITX3/MEIS1/FOXN4/SDK2/TSPAN12/CCDC66/RORB/SIX3/MEGF11/PROX2/PDE6C/COL8A1	26
BP	GO:0007548	sex differentiation	54|2417	237|14725	0.00640246	0.112463	ENSG00000154734/ENSG00000253293/ENSG00000005073/ENSG00000128714/ENSG00000114251/ENSG00000103449/ENSG00000137273/ENSG00000185008/ENSG00000145147/ENSG00000081059/ENSG00000169946/ENSG00000005513/ENSG00000184937/ENSG00000078549/ENSG00000054598/ENSG00000276644/ENSG00000075213/ENSG00000164093/ENSG00000157404/ENSG00000104332/ENSG00000102230/ENSG00000153208/ENSG00000100206/ENSG00000162624/ENSG00000106013…	ADAMTS1/HOXA10/HOXA11/HOXD13/WNT5A/SALL1/FOXF2/ROBO2/SLIT2/TCF7/ZFPM2/SOX8/WT1/ADCYAP1R1/FOXC1/DACH1/SEMA3A/PITX2/KIT/SFRP1/PCYT1B/MERTK/DMC1/LHX8/ANKRD7/LHX9/ATM/NKX2-1/BMP6/ROR2/SLIT3/CNTFR/CDKL2/DACH2/PDGFRA/CENPI/ASPM/FGF9/NASP/WDR19/MSH4/CBL/NTRK1/PDGFRB/FNDC3A/NR5A1/DMRT3/OSR1/RRM1/RDH10/SIRT1/AGO4/MSH2/TBX3	54
BP	GO:0001764	neuron migration	33|2417	131|14725	0.00648479	0.113554	ENSG00000152661/ENSG00000116141/ENSG00000150471/ENSG00000010810/ENSG00000007372/ENSG00000122691/ENSG00000176165/ENSG00000163623/ENSG00000158321/ENSG00000148704/ENSG00000173376/ENSG00000081189/ENSG00000137285/ENSG00000075213/ENSG00000164093/ENSG00000133026/ENSG00000143032/ENSG00000164532/ENSG00000150625/ENSG00000119042/ENSG00000185532/ENSG00000136352/ENSG00000112139/ENSG00000134369/ENSG00000162946…	GJA1/MARK1/ADGRL3/FYN/PAX6/TWIST1/FOXG1/NKX6-1/AUTS2/VAX1/NDNF/MEF2C/TUBB2B/SEMA3A/PITX2/MYH10/BARHL2/TBX20/GPM6A/SATB2/PRKG1/NKX2-1/MDGA1/NAV1/DISC1/SEMA6A/IGSF10/ATOH1/NTRK2/ASPM/LRP12/FZD3/USP9X	33
BP	GO:0045766	positive regulation of angiogenesis	36|2417	146|14725	0.00664243	0.115954	ENSG00000149948/ENSG00000114251/ENSG00000016082/ENSG00000102755/ENSG00000122691/ENSG00000138685/ENSG00000166501/ENSG00000119630/ENSG00000101445/ENSG00000101017/ENSG00000134954/ENSG00000131477/ENSG00000165757/ENSG00000117020/ENSG00000112333/ENSG00000184304/ENSG00000048052/ENSG00000124212/ENSG00000144891/ENSG00000239697/ENSG00000153904/ENSG00000183287/ENSG00000100292/ENSG00000176692/ENSG00000143494…	HMGA2/WNT5A/ISL1/FLT1/TWIST1/FGF2/PRKCB/PGF/PPP1R16B/CD40/ETS1/RAMP2/JCAD/AKT3/NR2E1/PRKD1/HDAC9/PTGIS/AGTR1/TNFSF12/DDAH1/CCBE1/HMOX1/FOXC2/VASH2/AQP1/PTGS2/CHRNA7/VEGFD/CD34/ITGA5/UTS2R/BRCA1/MIR10B/PRKCA/SIRT1	36
BP	GO:0001503	ossification	75|2417	348|14725	0.00674138	0.117317	ENSG00000152661/ENSG00000147257/ENSG00000198732/ENSG00000138829/ENSG00000128602/ENSG00000074047/ENSG00000038427/ENSG00000125931/ENSG00000019549/ENSG00000114251/ENSG00000138795/ENSG00000162733/ENSG00000122691/ENSG00000170577/ENSG00000183023/ENSG00000166341/ENSG00000233608/ENSG00000197467/ENSG00000005513/ENSG00000185920/ENSG00000054598/ENSG00000105880/ENSG00000164066/ENSG00000164107/ENSG00000204262…	GJA1/GPC3/SMOC1/FBN2/SMO/GLI2/VCAN/CITED1/SNAI2/WNT5A/LEF1/DDR2/TWIST1/SIX2/SLC8A1/DCHS1/TWIST2/COL13A1/SOX8/PTCH1/FOXC1/DLX5/INTU/HAND2/COL5A2/GPM6B/MEF2C/OSTN/SFRP1/SHOX2/MMP2/SH3PXD2B/LRRC17/CHRDL1/COL2A1/SLC26A2/S1PR1/LRP4/SATB2/RFLNB/ALPL/HOXA2/PKDCC/BMP6/PRKD1/MN1/FAT4/RASSF2/RIPPLY2/ROR2/COL6A1/NAB1/GDF10/SPARC/FOXC2/IGSF10/PPARGC1B/RORB/PTGS2/ZBTB16/TPH1/TNC/BCOR/TXLNG/ACVR2B/NOG/FGF9/GLI…	75
BP	GO:0086003	cardiac muscle cell contraction	17|2417	56|14725	0.00680406	0.118042	ENSG00000152661/ENSG00000145362/ENSG00000182963/ENSG00000183873/ENSG00000153956/ENSG00000177098/ENSG00000166257/ENSG00000165995/ENSG00000182533/ENSG00000149575/ENSG00000046604/ENSG00000134755/ENSG00000184588/ENSG00000113569/ENSG00000075142/ENSG00000151067/ENSG00000053918	GJA1/ANK2/GJC1/SCN5A/CACNA2D1/SCN4B/SCN3B/CACNB2/CAV3/SCN2B/DSG2/DSC2/PDE4B/NUP155/SRI/CACNA1C/KCNQ1	17
BP	GO:0055017	cardiac muscle tissue growth	22|2417	79|14725	0.00711817	0.123111	ENSG00000152661/ENSG00000183072/ENSG00000069702/ENSG00000138685/ENSG00000169946/ENSG00000054598/ENSG00000081189/ENSG00000173706/ENSG00000170989/ENSG00000164532/ENSG00000154556/ENSG00000149269/ENSG00000078900/ENSG00000143995/ENSG00000182533/ENSG00000176692/ENSG00000183691/ENSG00000102678/ENSG00000111087/ENSG00000198563/ENSG00000151748/ENSG00000151320	GJA1/NKX2-5/TGFBR3/FGF2/ZFPM2/FOXC1/MEF2C/HEG1/S1PR1/TBX20/SORBS2/PAK1/TP73/MEIS1/CAV3/FOXC2/NOG/FGF9/GLI1/DDX39B/SAV1/AKAP6	22
BP	GO:1905809	negative regulation of synapse organization	8|2417	19|14725	0.00714402	0.12318	ENSG00000114251/ENSG00000010810/ENSG00000185008/ENSG00000169760/ENSG00000135333/ENSG00000197959/ENSG00000196338/ENSG00000171532	WNT5A/FYN/ROBO2/NLGN1/EPHA7/DNM3/NLGN3/NEUROD2	8
BP	GO:1904062	regulation of cation transmembrane transport	57|2417	254|14725	0.00723772	0.12385	ENSG00000089327/ENSG00000145362/ENSG00000196730/ENSG00000196632/ENSG00000022267/ENSG00000181104/ENSG00000010810/ENSG00000183873/ENSG00000145335/ENSG00000182389/ENSG00000122691/ENSG00000153956/ENSG00000183023/ENSG00000169760/ENSG00000213366/ENSG00000077522/ENSG00000198947/ENSG00000081189/ENSG00000129159/ENSG00000118507/ENSG00000129244/ENSG00000177455/ENSG00000177098/ENSG00000154127/ENSG00000152818…	FXYD5/ANK2/DAPK1/WNK3/FHL1/F2R/FYN/SCN5A/SNCA/CACNB4/TWIST1/CACNA2D1/SLC8A1/NLGN1/GSTM2/ACTN2/DMD/MEF2C/KCNC1/AKAP7/ATP1B2/CD19/SCN4B/UBASH3B/UTRN/SCN3B/FXYD6/CACNG8/PM20D1/NLGN3/PRKD1/GAL/RANGRF/CACNB2/CAV3/SCN2B/TRPC1/FKBP1B/XCL1/CHRFAM7A/NIPSNAP2/NETO2/PDE4B/FMR1/KCNAB1/ATP2B4/STAC/SHANK1/SRI/RASGRF1/OSR1/CACNA1C/ALG10B/LYN/CLIC2/AKAP6/KCNQ1	57
BP	GO:0060042	retina morphogenesis in camera-type eye	13|2417	39|14725	0.00730605	0.12385	ENSG00000177707/ENSG00000005513/ENSG00000117707/ENSG00000173482/ENSG00000064309/ENSG00000113966/ENSG00000139445/ENSG00000069188/ENSG00000106025/ENSG00000180376/ENSG00000198963/ENSG00000157890/ENSG00000095464	NECTIN3/SOX8/PROX1/PTPRM/CDON/ARL6/FOXN4/SDK2/TSPAN12/CCDC66/RORB/MEGF11/PDE6C	13
BP	GO:0014842	regulation of skeletal muscle satellite cell proliferation	6|2417	12|14725	0.00731508	0.12385	ENSG00000138685/ENSG00000154928/ENSG00000154188/ENSG00000126778/ENSG00000138379/ENSG00000159086	FGF2/EPHB1/ANGPT1/SIX1/MSTN/PAXBP1	6
BP	GO:0038065	collagen-activated signaling pathway	6|2417	12|14725	0.00731508	0.12385	ENSG00000134871/ENSG00000197565/ENSG00000187498/ENSG00000162733/ENSG00000188153/ENSG00000154127	COL4A2/COL4A6/COL4A1/DDR2/COL4A5/UBASH3B	6
BP	GO:2000052	positive regulation of non-canonical Wnt signaling pathway	6|2417	12|14725	0.00731508	0.12385	ENSG00000147257/ENSG00000114251/ENSG00000140807/ENSG00000104332/ENSG00000135299/ENSG00000171843	GPC3/WNT5A/NKD1/SFRP1/ANKRD6/MLLT3	6
BP	GO:2000095	regulation of Wnt signaling pathway, planar cell polarity pathway	6|2417	12|14725	0.00731508	0.12385	ENSG00000147257/ENSG00000165617/ENSG00000140807/ENSG00000104332/ENSG00000135299/ENSG00000171843	GPC3/DACT1/NKD1/SFRP1/ANKRD6/MLLT3	6
BP	GO:0043200	response to amino acid	27|2417	103|14725	0.00750109	0.126581	ENSG00000084207/ENSG00000148516/ENSG00000197565/ENSG00000162909/ENSG00000187498/ENSG00000010810/ENSG00000149212/ENSG00000129596/ENSG00000119866/ENSG00000204262/ENSG00000087245/ENSG00000142156/ENSG00000126778/ENSG00000065150/ENSG00000134853/ENSG00000177058/ENSG00000173726/ENSG00000145431/ENSG00000025039/ENSG00000148053/ENSG00000023909/ENSG00000146648/ENSG00000138668/ENSG00000254087/ENSG00000078142…	GSTP1/ZEB1/COL4A6/CAPN2/COL4A1/FYN/SESN3/CDO1/BCL11A/COL5A2/MMP2/COL6A1/SIX1/IPO5/PDGFRA/SLC38A9/TOMM20/PDGFC/RRAGD/NTRK2/GCLM/EGFR/HNRNPD/LYN/PIK3C3/CRLS1/LARS	27
BP	GO:0061035	regulation of cartilage development	18|2417	61|14725	0.00752142	0.126581	ENSG00000074047/ENSG00000005073/ENSG00000019549/ENSG00000114251/ENSG00000077092/ENSG00000170577/ENSG00000178573/ENSG00000110693/ENSG00000134532/novel.261/ENSG00000168779/ENSG00000183688/ENSG00000109705/ENSG00000162878/ENSG00000153162/ENSG00000109906/ENSG00000156466/ENSG00000183691	GLI2/HOXA11/SNAI2/WNT5A/RARB/SIX2/MAF/SOX6/SOX5/-/SHOX2/RFLNB/NKX3-2/PKDCC/BMP6/ZBTB16/GDF6/NOG	18
BP	GO:0001755	neural crest cell migration	12|2417	35|14725	0.00764415	0.127501	ENSG00000184058/ENSG00000128602/ENSG00000016082/ENSG00000138795/ENSG00000169554/ENSG00000122691/ENSG00000005513/ENSG00000180318/ENSG00000164107/ENSG00000075213/ENSG00000164093/ENSG00000136160	TBX1/SMO/ISL1/LEF1/ZEB2/TWIST1/SOX8/ALX1/HAND2/SEMA3A/PITX2/EDNRB	12
BP	GO:0048048	embryonic eye morphogenesis	12|2417	35|14725	0.00764415	0.127501	ENSG00000138829/ENSG00000148516/ENSG00000114251/ENSG00000077092/ENSG00000137273/ENSG00000007372/ENSG00000122691/ENSG00000117707/ENSG00000075891/ENSG00000117122/ENSG00000138083/ENSG00000166147	FBN2/ZEB1/WNT5A/RARB/FOXF2/PAX6/TWIST1/PROX1/PAX2/MFAP2/SIX3/FBN1	12
BP	GO:2000648	positive regulation of stem cell proliferation	12|2417	35|14725	0.00764415	0.127501	ENSG00000149948/ENSG00000128602/ENSG00000007372/ENSG00000176165/ENSG00000142700/ENSG00000112333/ENSG00000162946/ENSG00000141384/ENSG00000066279/ENSG00000153187/ENSG00000104290/ENSG00000135111	HMGA2/SMO/PAX6/FOXG1/DMRTA2/NR2E1/DISC1/TAF4B/ASPM/HNRNPU/FZD3/TBX3	12
BP	GO:0070997	neuron death	66|2417	302|14725	0.00767761	0.12768	ENSG00000233276/ENSG00000213949/ENSG00000277586/ENSG00000125931/ENSG00000152192/ENSG00000114251/ENSG00000181104/ENSG00000010810/ENSG00000016082/ENSG00000091592/ENSG00000145335/ENSG00000153291/ENSG00000163064/ENSG00000147955/ENSG00000132386/ENSG00000171956/ENSG00000173376/ENSG00000135333/ENSG00000081189/ENSG00000136531/ENSG00000154928/ENSG00000143799/ENSG00000198908/ENSG00000120868/ENSG00000162877…	GPX1/ITGA1/NEFL/CITED1/POU4F1/WNT5A/F2R/FYN/ISL1/NLRP1/SNCA/SLC25A27/EN1/SIGMAR1/SERPINF1/FOXB1/NDNF/EPHA7/MEF2C/SCN2A/EPHB1/PARP1/BHLHB9/APAF1/PM20D1/ATM/ANGPT1/VSTM2L/TP73/TLR6/PAK3/PITX3/PPARA/EN2/CNTFR/LRRK2/SLC30A10/HMOX1/SIX1/GRID2/GRIK5/ITSN1/SNCB/EGLN1/CHRNA7/NAE1/CNTF/TP53BP2/NTRK2/GCLM/SARM1/CD34/UNC5B/POLB/CBL/NTRK1/BIRC5/GPR75/RAPSN/WNT3A/TRIM2/SIRT1/JUN/PRKN/CTSZ/MSH2	66
BP	GO:0003309	type B pancreatic cell differentiation	9|2417	23|14725	0.00772775	0.128135	ENSG00000128602/ENSG00000114251/ENSG00000007372/ENSG00000163623/ENSG00000139515/ENSG00000125820/ENSG00000173404/ENSG00000153162/ENSG00000185002	SMO/WNT5A/PAX6/NKX6-1/PDX1/NKX2-2/INSM1/BMP6/RFX6	9
BP	GO:0010863	positive regulation of phospholipase C activity	11|2417	31|14725	0.00787344	0.130167	ENSG00000102755/ENSG00000138685/ENSG00000198121/ENSG00000078549/ENSG00000157404/ENSG00000134853/ENSG00000166148/ENSG00000171596/ENSG00000146648/ENSG00000113721/ENSG00000151617	FLT1/FGF2/LPAR1/ADCYAP1R1/KIT/PDGFRA/AVPR1A/NMUR1/EGFR/PDGFRB/EDNRA	11
BP	GO:1902692	regulation of neuroblast proliferation	10|2417	27|14725	0.00793081	0.13073	ENSG00000128602/ENSG00000007372/ENSG00000176165/ENSG00000148704/ENSG00000142700/ENSG00000188906/ENSG00000162946/ENSG00000066279/ENSG00000138083/ENSG00000104290	SMO/PAX6/FOXG1/VAX1/DMRTA2/LRRK2/DISC1/ASPM/SIX3/FZD3	10
BP	GO:0003229	ventricular cardiac muscle tissue development	15|2417	48|14725	0.0080092	0.131637	ENSG00000152192/ENSG00000183072/ENSG00000069702/ENSG00000016082/ENSG00000169946/ENSG00000054598/ENSG00000117707/ENSG00000113196/ENSG00000173706/ENSG00000176692/ENSG00000046604/ENSG00000183691/ENSG00000049883/ENSG00000125686/ENSG00000135111	POU4F1/NKX2-5/TGFBR3/ISL1/ZFPM2/FOXC1/PROX1/HAND1/HEG1/FOXC2/DSG2/NOG/PTCD2/MED1/TBX3	15
BP	GO:0032409	regulation of transporter activity	49|2417	214|14725	0.008244	0.135101	ENSG00000152661/ENSG00000089327/ENSG00000145362/ENSG00000196730/ENSG00000196632/ENSG00000022267/ENSG00000145335/ENSG00000182389/ENSG00000122691/ENSG00000153956/ENSG00000169760/ENSG00000213366/ENSG00000077522/ENSG00000198947/ENSG00000085563/ENSG00000081189/ENSG00000129159/ENSG00000118507/ENSG00000129244/ENSG00000177098/ENSG00000152818/ENSG00000166257/ENSG00000137726/ENSG00000142408/ENSG00000162877…	GJA1/FXYD5/ANK2/DAPK1/WNK3/FHL1/SNCA/CACNB4/TWIST1/CACNA2D1/NLGN1/GSTM2/ACTN2/DMD/ABCB1/MEF2C/KCNC1/AKAP7/ATP1B2/SCN4B/UTRN/SCN3B/FXYD6/CACNG8/PM20D1/NLGN3/GAL/RANGRF/CACNB2/CAV3/SCN2B/GOPC/FKBP1B/CHRFAM7A/NIPSNAP2/NETO2/NDFIP2/PDE4B/FMR1/KCNAB1/STAC/SHANK1/SRI/RASGRF1/OSR1/ALG10B/KCTD7/CLIC2/AKAP6	49
BP	GO:0071772	response to BMP	37|2417	153|14725	0.00831241	0.135106	ENSG00000163430/ENSG00000147257/ENSG00000143869/ENSG00000114251/ENSG00000183072/ENSG00000069702/ENSG00000138795/ENSG00000174460/ENSG00000105880/ENSG00000133104/ENSG00000104332/ENSG00000120693/ENSG00000170801/ENSG00000101938/ENSG00000139219/ENSG00000166292/ENSG00000166707/ENSG00000141622/ENSG00000134569/ENSG00000163132/ENSG00000163909/ENSG00000171243/ENSG00000153162/ENSG00000182175/ENSG00000000005…	FSTL1/GPC3/GDF7/WNT5A/NKX2-5/TGFBR3/LEF1/ZCCHC12/DLX5/SPART/SFRP1/SMAD9/HTRA3/CHRDL1/COL2A1/TMEM100/ZCCHC18/RNF165/LRP4/MSX1/HEYL/SOSTDC1/BMP6/RGMA/TNMD/SKOR1/ROR2/GDF10/BMPER/GDF6/ACVR2B/NOG/TBXT/RBPMS2/SULF1/FBN1/USP9X	37
BP	GO:0071773	cellular response to BMP stimulus	37|2417	153|14725	0.00831241	0.135106	ENSG00000163430/ENSG00000147257/ENSG00000143869/ENSG00000114251/ENSG00000183072/ENSG00000069702/ENSG00000138795/ENSG00000174460/ENSG00000105880/ENSG00000133104/ENSG00000104332/ENSG00000120693/ENSG00000170801/ENSG00000101938/ENSG00000139219/ENSG00000166292/ENSG00000166707/ENSG00000141622/ENSG00000134569/ENSG00000163132/ENSG00000163909/ENSG00000171243/ENSG00000153162/ENSG00000182175/ENSG00000000005…	FSTL1/GPC3/GDF7/WNT5A/NKX2-5/TGFBR3/LEF1/ZCCHC12/DLX5/SPART/SFRP1/SMAD9/HTRA3/CHRDL1/COL2A1/TMEM100/ZCCHC18/RNF165/LRP4/MSX1/HEYL/SOSTDC1/BMP6/RGMA/TNMD/SKOR1/ROR2/GDF10/BMPER/GDF6/ACVR2B/NOG/TBXT/RBPMS2/SULF1/FBN1/USP9X	37
BP	GO:0010594	regulation of endothelial cell migration	36|2417	148|14725	0.00831646	0.135106	ENSG00000114251/ENSG00000037280/ENSG00000138685/ENSG00000145147/ENSG00000132386/ENSG00000117707/ENSG00000081189/ENSG00000173482/ENSG00000101017/ENSG00000118257/ENSG00000134954/ENSG00000165757/ENSG00000117020/ENSG00000112333/ENSG00000154188/ENSG00000184304/ENSG00000207870/ENSG00000020181/ENSG00000048052/ENSG00000164619/ENSG00000183287/ENSG00000100292/ENSG00000113140/ENSG00000176692/ENSG00000073756…	WNT5A/FLT4/FGF2/SLIT2/SERPINF1/PROX1/MEF2C/PTPRM/CD40/NRP2/ETS1/JCAD/AKT3/NR2E1/ANGPT1/PRKD1/MIR221/ADGRA2/HDAC9/BMPER/CCBE1/HMOX1/SPARC/FOXC2/PTGS2/SVBP/VASH1/PRCP/MIR10B/PRKCA/AMOTL1/RGCC/MIR196A1/PLPP3/SIRT1/CSNK2B	36
BP	GO:0003014	renal system process	26|2417	99|14725	0.00837012	0.135586	ENSG00000085662/ENSG00000152661/ENSG00000076706/ENSG00000181104/ENSG00000099139/ENSG00000126562/ENSG00000134548/ENSG00000136160/ENSG00000146021/ENSG00000196689/ENSG00000145244/ENSG00000170961/ENSG00000171885/ENSG00000144891/ENSG00000240583/ENSG00000151490/ENSG00000166148/ENSG00000174059/ENSG00000107560/ENSG00000181408/ENSG00000188687/ENSG00000080644/ENSG00000114302/ENSG00000137573/ENSG00000142875…	AKR1B1/GJA1/MCAM/F2R/PCSK5/WNK4/SPX/EDNRB/KLHL3/TRPV1/CORIN/HAS2/AQP4/AGTR1/AQP1/PTPRO/AVPR1A/CD34/RAB11FIP2/UTS2R/SLC4A5/CHRNA3/PRKAR2A/SULF1/PRKACB/KCNQ1	26
BP	GO:0006935	chemotaxis	101|2417	492|14725	0.00850162	0.137321	ENSG00000166086/ENSG00000084207/ENSG00000170689/ENSG00000149294/ENSG00000162738/ENSG00000126016/ENSG00000074047/ENSG00000143869/ENSG00000155980/ENSG00000213949/ENSG00000183853/ENSG00000130830/ENSG00000114251/ENSG00000010810/ENSG00000016082/ENSG00000102755/ENSG00000072832/ENSG00000153551/ENSG00000138795/ENSG00000185008/ENSG00000007372/ENSG00000176165/ENSG00000138685/ENSG00000145147/ENSG00000119630…	JAM3/GSTP1/HOXB9/NCAM1/VANGL2/AMOT/GLI2/GDF7/KIF5A/ITGA1/KIRREL1/MPP1/WNT5A/FYN/ISL1/FLT1/CRMP1/CMTM7/LEF1/ROBO2/PAX6/FOXG1/FGF2/SLIT2/PGF/ROBO3/LPAR1/PRKCQ/PTCH1/EPHA8/DLX5/VAX1/EPHA5/EPHA7/CXADR/TUBB2B/SEMA3A/KIT/PTPRM/ETV1/EPHB1/NRP2/EDNRB/CMTM3/MYH10/SEMA3D/ITGA9/S1PR1/RNF165/LAMA2/SEMA3G/LHX9/DOCK4/ANGPT1/NKX2-1/GAP43/THBS4/HOXA2/USP33/PRKD1/PLXNA2/PLA2G7/GBX1/ADGRA2/FLRT3/UNC5C/NFASC/AGTR1/…	101
BP	GO:0001505	regulation of neurotransmitter levels	60|2417	272|14725	0.0087209	0.140459	ENSG00000079215/ENSG00000079931/ENSG00000100505/ENSG00000145335/ENSG00000114200/ENSG00000148408/ENSG00000169760/ENSG00000143858/ENSG00000081181/ENSG00000007171/ENSG00000108576/ENSG00000116396/ENSG00000046653/ENSG00000101298/ENSG00000081189/ENSG00000160469/ENSG00000110076/ENSG00000157152/ENSG00000178445/ENSG00000118965/ENSG00000106688/ENSG00000134207/ENSG00000163661/ENSG00000174130/ENSG00000196689…	SLC1A3/MOXD1/TRIM9/SNCA/BCHE/CACNA1B/NLGN1/SYT2/ARG2/NOS2/SLC6A4/KCNC4/GPM6B/SNPH/MEF2C/BRSK1/NRXN2/SYN2/GLDC/WDR35/SLC1A1/SYT6/PTX3/TLR6/TRPV1/PCLO/NAALAD2/RORA/PTGIS/RIMS2/STX2/NRXN3/DHFR/DDAH1/LRRK2/COLQ/GART/SYN3/GRIK5/PTGS2/SYT15/TPH1/CD34/SYT17/FMR1/SYT9/AGTPBP1/ATP2B4/GAD2/PPFIA2/RIMS1/CHRNA3/AASDH/SYT11/GLA/ALDH9A1/PDE1B/DDAH2/PRKN/SYNJ1	60
BP	GO:0000724	double-strand break repair via homologous recombination	28|2417	109|14725	0.00876572	0.140777	ENSG00000147231/ENSG00000133863/ENSG00000130997/ENSG00000174010/ENSG00000186280/ENSG00000097046/ENSG00000143799/ENSG00000100206/ENSG00000149311/ENSG00000147536/ENSG00000156384/ENSG00000134758/ENSG00000125885/ENSG00000247746/ENSG00000173559/ENSG00000111247/ENSG00000020922/ENSG00000117748/ENSG00000127311/ENSG00000012048/ENSG00000116560/ENSG00000175595/ENSG00000085999/ENSG00000149554/ENSG00000146263…	CXorf57/TEX15/POLN/KLHL15/KDM4D/CDC7/PARP1/DMC1/ATM/GINS4/SFR1/RNF138/MCM8/USP51/NABP1/RAD51AP1/MRE11/RPA2/HELB/BRCA1/SFPQ/ERCC4/RAD54L/CHEK1/MMS22L/BLM/MCM9/RPA1	28
BP	GO:0007498	mesoderm development	29|2417	114|14725	0.00891513	0.142769	ENSG00000149948/ENSG00000116729/ENSG00000184058/ENSG00000128602/ENSG00000005073/ENSG00000152192/ENSG00000114251/ENSG00000138795/ENSG00000170577/ENSG00000103241/ENSG00000169946/ENSG00000072133/ENSG00000054598/ENSG00000090932/ENSG00000113196/ENSG00000104313/ENSG00000077943/ENSG00000075891/ENSG00000162367/ENSG00000164532/ENSG00000069248/ENSG00000176692/ENSG00000161405/ENSG00000114739/ENSG00000183691…	HMGA2/WLS/TBX1/SMO/HOXA11/POU4F1/WNT5A/LEF1/SIX2/FOXF1/ZFPM2/RPS6KA6/FOXC1/DLL3/HAND1/EYA1/ITGA8/PAX2/TAL1/TBX20/NUP133/FOXC2/IKZF3/ACVR2B/NOG/TBXT/OSR1/WNT3A/TBX3	29
BP	GO:0048762	mesenchymal cell differentiation	42|2417	179|14725	0.00896394	0.143143	ENSG00000149948/ENSG00000164683/ENSG00000184058/ENSG00000128602/ENSG00000162493/ENSG00000128918/ENSG00000019549/ENSG00000114251/ENSG00000069702/ENSG00000016082/ENSG00000137273/ENSG00000138795/ENSG00000169554/ENSG00000122691/ENSG00000170577/ENSG00000005513/ENSG00000180318/ENSG00000054598/ENSG00000164107/ENSG00000081189/ENSG00000075213/ENSG00000164093/ENSG00000104332/ENSG00000075891/ENSG00000136160…	HMGA2/HEY1/TBX1/SMO/PDPN/ALDH1A2/SNAI2/WNT5A/TGFBR3/ISL1/FOXF2/LEF1/ZEB2/TWIST1/SIX2/SOX8/ALX1/FOXC1/HAND2/MEF2C/SEMA3A/PITX2/SFRP1/PAX2/EDNRB/TMEM100/RFLNB/NKX2-1/MSX1/HEYL/MIR221/DACT3/HAS2/FOXC2/HDAC2/NOG/KBTBD8/DDX17/OSR1/EDNRA/RGCC/RDH10	42
BP	GO:0042330	taxis	101|2417	493|14725	0.00900943	0.143342	ENSG00000166086/ENSG00000084207/ENSG00000170689/ENSG00000149294/ENSG00000162738/ENSG00000126016/ENSG00000074047/ENSG00000143869/ENSG00000155980/ENSG00000213949/ENSG00000183853/ENSG00000130830/ENSG00000114251/ENSG00000010810/ENSG00000016082/ENSG00000102755/ENSG00000072832/ENSG00000153551/ENSG00000138795/ENSG00000185008/ENSG00000007372/ENSG00000176165/ENSG00000138685/ENSG00000145147/ENSG00000119630…	JAM3/GSTP1/HOXB9/NCAM1/VANGL2/AMOT/GLI2/GDF7/KIF5A/ITGA1/KIRREL1/MPP1/WNT5A/FYN/ISL1/FLT1/CRMP1/CMTM7/LEF1/ROBO2/PAX6/FOXG1/FGF2/SLIT2/PGF/ROBO3/LPAR1/PRKCQ/PTCH1/EPHA8/DLX5/VAX1/EPHA5/EPHA7/CXADR/TUBB2B/SEMA3A/KIT/PTPRM/ETV1/EPHB1/NRP2/EDNRB/CMTM3/MYH10/SEMA3D/ITGA9/S1PR1/RNF165/LAMA2/SEMA3G/LHX9/DOCK4/ANGPT1/NKX2-1/GAP43/THBS4/HOXA2/USP33/PRKD1/PLXNA2/PLA2G7/GBX1/ADGRA2/FLRT3/UNC5C/NFASC/AGTR1/…	101
BP	GO:0048638	regulation of developmental growth	62|2417	283|14725	0.00903912	0.143342	ENSG00000152661/ENSG00000128602/ENSG00000184486/ENSG00000136630/ENSG00000114251/ENSG00000183072/ENSG00000069702/ENSG00000131711/ENSG00000171517/ENSG00000119866/ENSG00000163623/ENSG00000138685/ENSG00000143858/ENSG00000169946/ENSG00000184937/ENSG00000185920/ENSG00000054598/ENSG00000117707/ENSG00000108576/ENSG00000140807/ENSG00000135333/ENSG00000081189/ENSG00000075213/ENSG00000188729/ENSG00000133104…	GJA1/SMO/POU3F2/HLX/WNT5A/NKX2-5/TGFBR3/MAP1B/LPAR3/BCL11A/NKX6-1/FGF2/SYT2/ZFPM2/WT1/PTCH1/FOXC1/PROX1/SLC6A4/NKD1/EPHA7/MEF2C/SEMA3A/OSTN/SPART/SFRP1/SH3PXD2B/BARHL2/TBX20/SEMA3G/PAK1/TLL2/TP73/PLXNA2/GAL/RGMA/MEIS1/RIMS2/FLVCR1/CAV3/COLQ/SIX1/FOXC2/TSHR/MSTN/MYOD1/FTO/SYT17/NOG/FGF9/GLI1/RUFY3/PRKDC/DDX39B/RIMS1/SAV1/CACNA2D2/TTL/WNT3A/AKAP6/PRKN/GPAM	62
BP	GO:0010595	positive regulation of endothelial cell migration	24|2417	90|14725	0.0090529	0.143342	ENSG00000114251/ENSG00000037280/ENSG00000138685/ENSG00000117707/ENSG00000101017/ENSG00000118257/ENSG00000134954/ENSG00000165757/ENSG00000117020/ENSG00000154188/ENSG00000184304/ENSG00000207870/ENSG00000020181/ENSG00000048052/ENSG00000183287/ENSG00000100292/ENSG00000113140/ENSG00000176692/ENSG00000073756/ENSG00000207744/ENSG00000154229/ENSG00000166025/ENSG00000162407/ENSG00000096717	WNT5A/FLT4/FGF2/PROX1/CD40/NRP2/ETS1/JCAD/AKT3/ANGPT1/PRKD1/MIR221/ADGRA2/HDAC9/CCBE1/HMOX1/SPARC/FOXC2/PTGS2/MIR10B/PRKCA/AMOTL1/PLPP3/SIRT1	24
BP	GO:0044782	cilium organization	74|2417	347|14725	0.00915273	0.144516	ENSG00000115355/ENSG00000162738/ENSG00000134874/ENSG00000144451/ENSG00000125257/ENSG00000164066/ENSG00000169126/ENSG00000158163/ENSG00000146350/ENSG00000187240/ENSG00000144061/ENSG00000138686/ENSG00000099204/ENSG00000160050/ENSG00000075945/ENSG00000132122/ENSG00000117245/ENSG00000118965/ENSG00000115423/ENSG00000122970/ENSG00000113966/ENSG00000128881/ENSG00000103494/ENSG00000179532/ENSG00000170264…	CCDC88A/VANGL2/DZIP1/SPAG16/ABCC4/INTU/ARMC4/DZIP1L/TBC1D32/DYNC2H1/NPHP1/BBS7/ABLIM1/CCDC28B/KIFAP3/SPATA6/KIF17/WDR35/DNAH6/IFT81/ARL6/TTBK2/RPGRIP1L/DNHD1/FAM161A/DNAH14/PIBF1/CDC14B/CEP126/NEK1/TUBB4A/CEP290/DISC1/CEP97/BBS12/RSPH4A/CYLD/CEP135/MNS1/CEP57/KIF3A/SCLT1/TMEM237/CCDC65/DYNC2LI1/RTTN/HSPB11/CEP162/WDR19/SSX2IP/NEK2/CCDC113/MCIDAS/TRAF3IP1/LRGUK/RPGR/HAUS6/TCTN2/CEP19/TMEM67/ONECUT…	74
BP	GO:0055003	cardiac myofibril assembly	7|2417	16|14725	0.00921794	0.144929	ENSG00000183072/ENSG00000117707/ENSG00000133026/ENSG00000155657/ENSG00000134853/ENSG00000134775/ENSG00000113721	NKX2-5/PROX1/MYH10/TTN/PDGFRA/FHOD3/PDGFRB	7
BP	GO:0035735	intraciliary transport involved in cilium assembly	13|2417	40|14725	0.00923048	0.144929	ENSG00000187240/ENSG00000075945/ENSG00000117245/ENSG00000118965/ENSG00000122970/ENSG00000131437/ENSG00000138036/ENSG00000081870/ENSG00000157796/ENSG00000117155/ENSG00000204104/ENSG00000083312/ENSG00000068885	DYNC2H1/KIFAP3/KIF17/WDR35/IFT81/KIF3A/DYNC2LI1/HSPB11/WDR19/SSX2IP/TRAF3IP1/TNPO1/IFT80	13
BP	GO:0003018	vascular process in circulatory system	35|2417	144|14725	0.00928395	0.145362	ENSG00000152661/ENSG00000233276/ENSG00000169860/ENSG00000213949/ENSG00000181104/ENSG00000183023/ENSG00000145147/ENSG00000007171/ENSG00000054598/ENSG00000108576/ENSG00000116741/ENSG00000173482/ENSG00000136160/ENSG00000131477/ENSG00000185532/ENSG00000133019/ENSG00000118965/ENSG00000164116/ENSG00000128512/ENSG00000154188/ENSG00000170425/ENSG00000171388/ENSG00000144596/ENSG00000144891/ENSG00000153904…	GJA1/GPX1/P2RY1/ITGA1/F2R/SLC8A1/SLIT2/NOS2/FOXC1/SLC6A4/RGS2/PTPRM/EDNRB/RAMP2/PRKG1/CHRM3/WDR35/GUCY1A1/DOCK4/ANGPT1/ADORA2B/APLN/GRIP2/AGTR1/DDAH1/HMOX1/NTS/FOXC2/PTGS2/AVPR1A/GCLM/TBXAS1/UTS2R/EGFR/EDNRA	35
BP	GO:0099565	chemical synaptic transmission, postsynaptic	25|2417	95|14725	0.00934204	0.145866	ENSG00000145335/ENSG00000169760/ENSG00000144868/ENSG00000081189/ENSG00000111249/ENSG00000182771/ENSG00000108852/ENSG00000196338/ENSG00000196689/ENSG00000101204/ENSG00000176406/ENSG00000188906/ENSG00000152208/ENSG00000166664/ENSG00000102924/ENSG00000105737/ENSG00000175344/ENSG00000198785/ENSG00000087053/ENSG00000161681/ENSG00000101489/ENSG00000079841/ENSG00000080644/ENSG00000152578/ENSG00000149403	SNCA/NLGN1/TMEM108/MEF2C/CUX2/GRID1/MPP2/NLGN3/TRPV1/CHRNA4/RIMS2/LRRK2/GRID2/CHRFAM7A/CBLN1/GRIK5/CHRNA7/GRIN3A/MTMR2/SHANK1/CELF4/RIMS1/CHRNA3/GRIA4/GRIK4	25
BP	GO:0006024	glycosaminoglycan biosynthetic process	26|2417	100|14725	0.0095879	0.14929	ENSG00000147257/ENSG00000038427/ENSG00000153976/ENSG00000175040/ENSG00000111817/ENSG00000198108/ENSG00000183196/ENSG00000122863/ENSG00000118276/ENSG00000064225/ENSG00000154080/ENSG00000136542/ENSG00000154188/ENSG00000157350/ENSG00000125430/ENSG00000170961/ENSG00000155893/ENSG00000116704/ENSG00000173546/ENSG00000179399/ENSG00000113721/ENSG00000174684/ENSG00000169826/ENSG00000183098/ENSG00000140835…	GPC3/VCAN/HS3ST3A1/CHST2/DSE/CHSY3/CHST6/CHST3/B4GALT6/ST3GAL6/CHST9/GALNT5/ANGPT1/ST3GAL2/HS3ST3B1/HAS2/PXYLP1/SLC35D1/CSPG4/GPC5/PDGFRB/B4GAT1/CSGALNACT2/GPC6/CHST4/HS6ST2	26
BP	GO:0071300	cellular response to retinoic acid	19|2417	67|14725	0.00968904	0.150321	ENSG00000184058/ENSG00000128918/ENSG00000114251/ENSG00000132386/ENSG00000108576/ENSG00000075891/ENSG00000105996/ENSG00000062524/ENSG00000003137/ENSG00000240583/ENSG00000198963/ENSG00000196591/ENSG00000041982/ENSG00000169884/ENSG00000111432/ENSG00000164458/ENSG00000143867/ENSG00000254087/ENSG00000154342	TBX1/ALDH1A2/WNT5A/SERPINF1/SLC6A4/PAX2/HOXA2/LTK/CYP26B1/AQP1/RORB/HDAC2/TNC/WNT10B/FZD10/TBXT/OSR1/LYN/WNT3A	19
BP	GO:0001942	hair follicle development	22|2417	81|14725	0.00970764	0.150321	ENSG00000162738/ENSG00000128602/ENSG00000052850/ENSG00000114251/ENSG00000164066/ENSG00000178919/ENSG00000139292/ENSG00000156535/ENSG00000133710/ENSG00000134569/ENSG00000125285/ENSG00000171243/ENSG00000069482/ENSG00000162601/ENSG00000127863/ENSG00000196591/ENSG00000158813/ENSG00000146648/ENSG00000169884/ENSG00000116478/ENSG00000151748/ENSG00000104290	VANGL2/SMO/ALX4/WNT5A/INTU/FOXE1/LGR5/CD109/SPINK5/LRP4/SOX21/SOSTDC1/GAL/MYSM1/TNFRSF19/HDAC2/EDA/EGFR/WNT10B/HDAC1/SAV1/FZD3	22
BP	GO:0001706	endoderm formation	15|2417	49|14725	0.00982955	0.151375	ENSG00000149948/ENSG00000134871/ENSG00000091136/ENSG00000115232/ENSG00000204262/ENSG00000087245/ENSG00000164532/ENSG00000142156/ENSG00000198730/ENSG00000204531/ENSG00000183691/ENSG00000161638/ENSG00000053747/ENSG00000171056/ENSG00000144810	HMGA2/COL4A2/LAMB1/ITGA4/COL5A2/MMP2/TBX20/COL6A1/CTR9/POU5F1/NOG/ITGA5/LAMA3/SOX7/COL8A1	15
BP	GO:0043392	negative regulation of DNA binding	15|2417	49|14725	0.00982955	0.151375	ENSG00000149948/ENSG00000164683/ENSG00000128602/ENSG00000138795/ENSG00000113196/ENSG00000164107/ENSG00000163132/ENSG00000186951/ENSG00000100292/ENSG00000196591/ENSG00000148143/ENSG00000117650/ENSG00000075142/ENSG00000175595/ENSG00000177606	HMGA2/HEY1/SMO/LEF1/HAND1/HAND2/MSX1/PPARA/HMOX1/HDAC2/ZNF462/NEK2/SRI/ERCC4/JUN	15
BP	GO:0000725	recombinational repair	28|2417	110|14725	0.00996297	0.152777	ENSG00000147231/ENSG00000133863/ENSG00000130997/ENSG00000174010/ENSG00000186280/ENSG00000097046/ENSG00000143799/ENSG00000100206/ENSG00000149311/ENSG00000147536/ENSG00000156384/ENSG00000134758/ENSG00000125885/ENSG00000247746/ENSG00000173559/ENSG00000111247/ENSG00000020922/ENSG00000117748/ENSG00000127311/ENSG00000012048/ENSG00000116560/ENSG00000175595/ENSG00000085999/ENSG00000149554/ENSG00000146263…	CXorf57/TEX15/POLN/KLHL15/KDM4D/CDC7/PARP1/DMC1/ATM/GINS4/SFR1/RNF138/MCM8/USP51/NABP1/RAD51AP1/MRE11/RPA2/HELB/BRCA1/SFPQ/ERCC4/RAD54L/CHEK1/MMS22L/BLM/MCM9/RPA1	28
BP	GO:0060047	heart contraction	53|2417	237|14725	0.0100094	0.152777	ENSG00000152661/ENSG00000233276/ENSG00000145362/ENSG00000182963/ENSG00000112276/ENSG00000184185/ENSG00000183072/ENSG00000183873/ENSG00000087258/ENSG00000182389/ENSG00000148408/ENSG00000153956/ENSG00000183023/ENSG00000213366/ENSG00000108984/ENSG00000198947/ENSG00000154639/ENSG00000075213/ENSG00000116741/ENSG00000048740/ENSG00000134548/ENSG00000129244/ENSG00000155657/ENSG00000177098/ENSG00000157445…	GJA1/GPX1/ANK2/GJC1/BVES/KCNJ12/NKX2-5/SCN5A/GNAO1/CACNB4/CACNA1B/CACNA2D1/SLC8A1/GSTM2/MAP2K6/DMD/CXADR/SEMA3A/RGS2/CELF2/SPX/ATP1B2/TTN/SCN4B/CACNA2D3/SCN3B/FXYD6/SLC1A1/CACNG8/CORIN/APLN/FOXN4/RANGRF/CACNB2/CAV3/SLC8A3/SCN2B/TRPC1/FKBP1B/DSG2/DSC2/AVPR1A/CHRNA7/PDE4B/NMU/ATP2B4/NUP155/SRI/CACNA2D2/CACNA1C/CLIC2/ASPH/KCNQ1	53
BP	GO:0050953	sensory perception of light stimulus	40|2417	170|14725	0.0100737	0.152777	ENSG00000050555/ENSG00000182963/ENSG00000007372/ENSG00000112319/ENSG00000107736/ENSG00000095777/ENSG00000006611/ENSG00000075891/ENSG00000138686/ENSG00000099204/ENSG00000139219/ENSG00000131480/ENSG00000112333/ENSG00000121743/ENSG00000113966/ENSG00000145476/ENSG00000170264/ENSG00000043355/ENSG00000165995/ENSG00000137955/ENSG00000183423/ENSG00000180376/ENSG00000188107/ENSG00000106536/ENSG00000128617…	LAMC3/GJC1/PAX6/EYA4/CDH23/MYO3A/USH1C/PAX2/BBS7/ABLIM1/COL2A1/AOC2/NR2E1/GJA3/ARL6/CYP4V2/FAM161A/ZIC2/CACNB2/RABGGTB/LRIT3/CCDC66/EYS/POU6F2/OPN1SW/RORB/EYA3/RGS9/RP2/SIX3/OAT/RPGR/CHM/RIMS1/TIMP3/GABRR2/RDH10/RRH/SLC45A2/PDE6C	40
BP	GO:0030323	respiratory tube development	39|2417	165|14725	0.0101547	0.152777	ENSG00000147257/ENSG00000162738/ENSG00000106004/ENSG00000074047/ENSG00000128573/ENSG00000162493/ENSG00000128918/ENSG00000114251/ENSG00000037280/ENSG00000103241/ENSG00000099139/ENSG00000169946/ENSG00000117707/ENSG00000087116/ENSG00000173706/ENSG00000164093/ENSG00000113083/ENSG00000136352/ENSG00000162878/ENSG00000183287/ENSG00000113140/ENSG00000136158/ENSG00000156925/ENSG00000134853/ENSG00000041982…	GPC3/VANGL2/HOXA5/GLI2/FOXP2/PDPN/ALDH1A2/WNT5A/FLT4/FOXF1/PCSK5/ZFPM2/PROX1/ADAMTS2/HEG1/PITX2/LOX/NKX2-1/PKDCC/CCBE1/SPARC/SPRY2/ZIC3/PDGFRA/TNC/ACVR2B/HSPB11/NOG/FGF9/GLI1/EGFR/PDGFRB/SAV1/NKX2-8/LIPA/RDH10/AARD/CCDC39/CTSZ	39
BP	GO:0006293	nucleotide-excision repair, preincision complex stabilization	8|2417	20|14725	0.0102196	0.152777	ENSG00000145736/ENSG00000143799/ENSG00000158290/ENSG00000272047/ENSG00000117748/ENSG00000111358/ENSG00000175595/ENSG00000132383	GTF2H2/PARP1/CUL4B/GTF2H5/RPA2/GTF2H3/ERCC4/RPA1	8
BP	GO:0006295	nucleotide-excision repair, DNA incision, 3'-to lesion	8|2417	20|14725	0.0102196	0.152777	ENSG00000145736/ENSG00000143799/ENSG00000158290/ENSG00000272047/ENSG00000117748/ENSG00000111358/ENSG00000175595/ENSG00000132383	GTF2H2/PARP1/CUL4B/GTF2H5/RPA2/GTF2H3/ERCC4/RPA1	8
BP	GO:0021513	spinal cord dorsal/ventral patterning	8|2417	20|14725	0.0102196	0.152777	ENSG00000128602/ENSG00000074047/ENSG00000007372/ENSG00000163623/ENSG00000164066/ENSG00000125820/ENSG00000139445/ENSG00000064218	SMO/GLI2/PAX6/NKX6-1/INTU/NKX2-2/FOXN4/DMRT3	8
BP	GO:0031290	retinal ganglion cell axon guidance	8|2417	20|14725	0.0102196	0.152777	ENSG00000016082/ENSG00000185008/ENSG00000145147/ENSG00000135333/ENSG00000173482/ENSG00000154928/ENSG00000159556/ENSG00000151490	ISL1/ROBO2/SLIT2/EPHA7/PTPRM/EPHB1/ISL2/PTPRO	8
BP	GO:0045932	negative regulation of muscle contraction	8|2417	20|14725	0.0102196	0.152777	ENSG00000116741/ENSG00000185532/ENSG00000164116/ENSG00000128512/ENSG00000064989/ENSG00000170425/ENSG00000073756/ENSG00000075142	RGS2/PRKG1/GUCY1A1/DOCK4/CALCRL/ADORA2B/PTGS2/SRI	8
BP	GO:2000050	regulation of non-canonical Wnt signaling pathway	8|2417	20|14725	0.0102196	0.152777	ENSG00000147257/ENSG00000146122/ENSG00000114251/ENSG00000165617/ENSG00000140807/ENSG00000104332/ENSG00000135299/ENSG00000171843	GPC3/DAAM2/WNT5A/DACT1/NKD1/SFRP1/ANKRD6/MLLT3	8
BP	GO:2000104	negative regulation of DNA-dependent DNA replication	8|2417	20|14725	0.0102196	0.152777	ENSG00000101972/ENSG00000147601/ENSG00000020922/ENSG00000075131/ENSG00000159147/ENSG00000108055/ENSG00000197299/ENSG00000072501	STAG2/TERF1/MRE11/TIPIN/DONSON/SMC3/BLM/SMC1A	8
BP	GO:0060271	cilium assembly	72|2417	338|14725	0.0103017	0.153448	ENSG00000115355/ENSG00000162738/ENSG00000134874/ENSG00000144451/ENSG00000125257/ENSG00000164066/ENSG00000169126/ENSG00000158163/ENSG00000146350/ENSG00000187240/ENSG00000144061/ENSG00000138686/ENSG00000099204/ENSG00000160050/ENSG00000075945/ENSG00000132122/ENSG00000117245/ENSG00000118965/ENSG00000115423/ENSG00000122970/ENSG00000113966/ENSG00000128881/ENSG00000103494/ENSG00000179532/ENSG00000170264…	CCDC88A/VANGL2/DZIP1/SPAG16/ABCC4/INTU/ARMC4/DZIP1L/TBC1D32/DYNC2H1/NPHP1/BBS7/ABLIM1/CCDC28B/KIFAP3/SPATA6/KIF17/WDR35/DNAH6/IFT81/ARL6/TTBK2/RPGRIP1L/DNHD1/FAM161A/DNAH14/PIBF1/CDC14B/CEP126/NEK1/TUBB4A/CEP290/DISC1/CEP97/RSPH4A/CYLD/CEP135/MNS1/CEP57/KIF3A/SCLT1/TMEM237/CCDC65/DYNC2LI1/HSPB11/CEP162/WDR19/SSX2IP/NEK2/CCDC113/MCIDAS/TRAF3IP1/LRGUK/RPGR/HAUS6/TCTN2/CEP19/TMEM67/ONECUT2/TEKT3/CCP…	72
BP	GO:0022898	regulation of transmembrane transporter activity	46|2417	201|14725	0.010319	0.153448	ENSG00000152661/ENSG00000089327/ENSG00000145362/ENSG00000196730/ENSG00000196632/ENSG00000022267/ENSG00000182389/ENSG00000122691/ENSG00000153956/ENSG00000169760/ENSG00000213366/ENSG00000077522/ENSG00000198947/ENSG00000085563/ENSG00000081189/ENSG00000129159/ENSG00000118507/ENSG00000129244/ENSG00000177098/ENSG00000152818/ENSG00000166257/ENSG00000137726/ENSG00000142408/ENSG00000162877/ENSG00000196338…	GJA1/FXYD5/ANK2/DAPK1/WNK3/FHL1/CACNB4/TWIST1/CACNA2D1/NLGN1/GSTM2/ACTN2/DMD/ABCB1/MEF2C/KCNC1/AKAP7/ATP1B2/SCN4B/UTRN/SCN3B/FXYD6/CACNG8/PM20D1/NLGN3/GAL/RANGRF/CACNB2/CAV3/SCN2B/GOPC/FKBP1B/CHRFAM7A/NIPSNAP2/NETO2/PDE4B/FMR1/KCNAB1/STAC/SHANK1/SRI/RASGRF1/OSR1/ALG10B/CLIC2/AKAP6	46
BP	GO:0010880	regulation of release of sequestered calcium ion into cytosol by sarcoplasmic reticulum	9|2417	24|14725	0.0105946	0.156306	ENSG00000145362/ENSG00000183023/ENSG00000213366/ENSG00000198947/ENSG00000119782/ENSG00000075142/ENSG00000151067/ENSG00000155962/ENSG00000151320	ANK2/SLC8A1/GSTM2/DMD/FKBP1B/SRI/CACNA1C/CLIC2/AKAP6	9
BP	GO:0035883	enteroendocrine cell differentiation	9|2417	24|14725	0.0105946	0.156306	ENSG00000128602/ENSG00000114251/ENSG00000007372/ENSG00000163623/ENSG00000139515/ENSG00000125820/ENSG00000173404/ENSG00000153162/ENSG00000185002	SMO/WNT5A/PAX6/NKX6-1/PDX1/NKX2-2/INSM1/BMP6/RFX6	9
BP	GO:0060740	prostate gland epithelium morphogenesis	9|2417	24|14725	0.0105946	0.156306	ENSG00000074047/ENSG00000159184/ENSG00000128714/ENSG00000114251/ENSG00000104332/ENSG00000041982/ENSG00000183691/ENSG00000137573/ENSG00000172201	GLI2/HOXB13/HOXD13/WNT5A/SFRP1/TNC/NOG/SULF1/ID4	9
BP	GO:0051145	smooth muscle cell differentiation	16|2417	54|14725	0.0109059	0.160476	ENSG00000164683/ENSG00000148516/ENSG00000103241/ENSG00000116761/ENSG00000081189/ENSG00000164093/ENSG00000157404/ENSG00000077943/ENSG00000136160/ENSG00000131477/ENSG00000207870/ENSG00000126778/ENSG00000166831/ENSG00000184481/ENSG00000096717/ENSG00000163069	HEY1/ZEB1/FOXF1/CTH/MEF2C/PITX2/KIT/ITGA8/EDNRB/RAMP2/MIR221/SIX1/RBPMS2/FOXO4/SIRT1/SGCB	16
BP	GO:0006023	aminoglycan biosynthetic process	26|2417	101|14725	0.0109461	0.160648	ENSG00000147257/ENSG00000038427/ENSG00000153976/ENSG00000175040/ENSG00000111817/ENSG00000198108/ENSG00000183196/ENSG00000122863/ENSG00000118276/ENSG00000064225/ENSG00000154080/ENSG00000136542/ENSG00000154188/ENSG00000157350/ENSG00000125430/ENSG00000170961/ENSG00000155893/ENSG00000116704/ENSG00000173546/ENSG00000179399/ENSG00000113721/ENSG00000174684/ENSG00000169826/ENSG00000183098/ENSG00000140835…	GPC3/VCAN/HS3ST3A1/CHST2/DSE/CHSY3/CHST6/CHST3/B4GALT6/ST3GAL6/CHST9/GALNT5/ANGPT1/ST3GAL2/HS3ST3B1/HAS2/PXYLP1/SLC35D1/CSPG4/GPC5/PDGFRB/B4GAT1/CSGALNACT2/GPC6/CHST4/HS6ST2	26
BP	GO:0007369	gastrulation	39|2417	166|14725	0.0112251	0.164314	ENSG00000149948/ENSG00000134871/ENSG00000162738/ENSG00000116729/ENSG00000126016/ENSG00000005073/ENSG00000091136/ENSG00000114251/ENSG00000138795/ENSG00000115232/ENSG00000170577/ENSG00000103241/ENSG00000054598/ENSG00000113196/ENSG00000204262/ENSG00000104313/ENSG00000077943/ENSG00000104332/ENSG00000075891/ENSG00000087245/ENSG00000162367/ENSG00000164532/ENSG00000207870/ENSG00000171388/ENSG00000165588…	HMGA2/COL4A2/VANGL2/WLS/AMOT/HOXA11/LAMB1/WNT5A/LEF1/ITGA4/SIX2/FOXF1/FOXC1/HAND1/COL5A2/EYA1/ITGA8/SFRP1/PAX2/MMP2/TAL1/TBX20/MIR221/APLN/OTX2/COL6A1/CTR9/FOXC2/POU5F1/ACVR2B/NOG/ITGA5/LAMA3/TBXT/OSR1/SOX7/RNF2/WNT3A/COL8A1	39
BP	GO:0098773	skin epidermis development	22|2417	82|14725	0.0112616	0.164419	ENSG00000162738/ENSG00000128602/ENSG00000052850/ENSG00000114251/ENSG00000164066/ENSG00000178919/ENSG00000139292/ENSG00000156535/ENSG00000133710/ENSG00000134569/ENSG00000125285/ENSG00000171243/ENSG00000069482/ENSG00000162601/ENSG00000127863/ENSG00000196591/ENSG00000158813/ENSG00000146648/ENSG00000169884/ENSG00000116478/ENSG00000151748/ENSG00000104290	VANGL2/SMO/ALX4/WNT5A/INTU/FOXE1/LGR5/CD109/SPINK5/LRP4/SOX21/SOSTDC1/GAL/MYSM1/TNFRSF19/HDAC2/EDA/EGFR/WNT10B/HDAC1/SAV1/FZD3	22
BP	GO:0030324	lung development	38|2417	161|14725	0.0113202	0.164681	ENSG00000147257/ENSG00000162738/ENSG00000106004/ENSG00000074047/ENSG00000128573/ENSG00000162493/ENSG00000128918/ENSG00000114251/ENSG00000037280/ENSG00000103241/ENSG00000169946/ENSG00000117707/ENSG00000087116/ENSG00000173706/ENSG00000164093/ENSG00000113083/ENSG00000136352/ENSG00000162878/ENSG00000183287/ENSG00000113140/ENSG00000136158/ENSG00000156925/ENSG00000134853/ENSG00000041982/ENSG00000114739…	GPC3/VANGL2/HOXA5/GLI2/FOXP2/PDPN/ALDH1A2/WNT5A/FLT4/FOXF1/ZFPM2/PROX1/ADAMTS2/HEG1/PITX2/LOX/NKX2-1/PKDCC/CCBE1/SPARC/SPRY2/ZIC3/PDGFRA/TNC/ACVR2B/HSPB11/NOG/FGF9/GLI1/EGFR/PDGFRB/SAV1/NKX2-8/LIPA/RDH10/AARD/CCDC39/CTSZ	38
BP	GO:0021766	hippocampus development	19|2417	68|14725	0.0114273	0.164681	ENSG00000128602/ENSG00000277586/ENSG00000138795/ENSG00000169554/ENSG00000144868/ENSG00000117707/ENSG00000145242/ENSG00000115844/ENSG00000170370/ENSG00000112333/ENSG00000136352/ENSG00000170390/ENSG00000131437/ENSG00000058668/ENSG00000168389/ENSG00000172201/ENSG00000154342/ENSG00000149557/ENSG00000070785	SMO/NEFL/LEF1/ZEB2/TMEM108/PROX1/EPHA5/DLX2/EMX2/NR2E1/NKX2-1/DCLK2/KIF3A/ATP2B4/MFSD2A/ID4/WNT3A/FEZ1/EIF2B3	19
BP	GO:0034109	homotypic cell-cell adhesion	19|2417	68|14725	0.0114273	0.164681	ENSG00000162493/ENSG00000065675/ENSG00000154639/ENSG00000135919/ENSG00000154127/ENSG00000185532/ENSG00000145794/ENSG00000046604/ENSG00000134853/ENSG00000134755/ENSG00000173918/ENSG00000035403/ENSG00000254087/ENSG00000185245/ENSG00000154229/ENSG00000154342/ENSG00000162407/ENSG00000157890/ENSG00000115956	PDPN/PRKCQ/CXADR/SERPINE2/UBASH3B/PRKG1/MEGF10/DSG2/PDGFRA/DSC2/C1QTNF1/VCL/LYN/GP1BA/PRKCA/WNT3A/PLPP3/MEGF11/PLEK	19
BP	GO:0008277	regulation of G-protein coupled receptor protein signaling pathway	30|2417	121|14725	0.0114913	0.164681	ENSG00000145335/ENSG00000143248/ENSG00000138193/ENSG00000116741/ENSG00000145736/ENSG00000135324/ENSG00000131477/ENSG00000102003/ENSG00000077254/ENSG00000117152/ENSG00000103494/ENSG00000171388/ENSG00000198873/ENSG00000168243/ENSG00000147509/ENSG00000188906/ENSG00000106976/ENSG00000163686/ENSG00000176533/ENSG00000108370/ENSG00000183775/ENSG00000070601/ENSG00000058668/ENSG00000169220/ENSG00000111142…	SNCA/RGS5/PLCE1/RGS2/GTF2H2/MRAP2/RAMP2/SYP/USP33/RGS4/RPGRIP1L/APLN/GRK5/GNG4/RGS20/LRRK2/DNM1/ABHD6/GNG7/RGS9/KCTD16/FRMPD1/ATP2B4/RGS14/METAP2/PRKCA/NMT2/RIC8B/PLEK/PTGDR2	30
BP	GO:0036465	synaptic vesicle recycling	13|2417	41|14725	0.0115296	0.164681	ENSG00000145335/ENSG00000169760/ENSG00000143858/ENSG00000197959/ENSG00000107295/ENSG00000102003/ENSG00000196338/ENSG00000188906/ENSG00000106976/ENSG00000205726/ENSG00000132718/ENSG00000154342/ENSG00000159082	SNCA/NLGN1/SYT2/DNM3/SH3GL2/SYP/NLGN3/LRRK2/DNM1/ITSN1/SYT11/WNT3A/SYNJ1	13
BP	GO:0006937	regulation of muscle contraction	34|2417	141|14725	0.0115621	0.164681	ENSG00000145362/ENSG00000181104/ENSG00000183072/ENSG00000183873/ENSG00000183023/ENSG00000213366/ENSG00000198947/ENSG00000138193/ENSG00000116741/ENSG00000157404/ENSG00000134548/ENSG00000182674/ENSG00000185532/ENSG00000133019/ENSG00000164116/ENSG00000128512/ENSG00000064989/ENSG00000180616/ENSG00000170425/ENSG00000108961/ENSG00000182533/ENSG00000100678/ENSG00000119782/ENSG00000046604/ENSG00000134755…	ANK2/F2R/NKX2-5/SCN5A/SLC8A1/GSTM2/DMD/PLCE1/RGS2/KIT/SPX/KCNB2/PRKG1/CHRM3/GUCY1A1/DOCK4/CALCRL/SSTR2/ADORA2B/RANGRF/CAV3/SLC8A3/FKBP1B/DSG2/DSC2/PTGS2/PROK2/PDE4B/NMU/SRI/CHRNA3/CACNA1C/CLIC2/KCNQ1	34
BP	GO:0061337	cardiac conduction	32|2417	131|14725	0.0115746	0.164681	ENSG00000152661/ENSG00000145362/ENSG00000182963/ENSG00000184185/ENSG00000183072/ENSG00000183873/ENSG00000182389/ENSG00000153956/ENSG00000183023/ENSG00000154639/ENSG00000129244/ENSG00000177098/ENSG00000157445/ENSG00000166257/ENSG00000137726/ENSG00000142408/ENSG00000145244/ENSG00000108961/ENSG00000165995/ENSG00000100678/ENSG00000149575/ENSG00000144935/ENSG00000119782/ENSG00000046604/ENSG00000134755…	GJA1/ANK2/GJC1/KCNJ12/NKX2-5/SCN5A/CACNB4/CACNA2D1/SLC8A1/CXADR/ATP1B2/SCN4B/CACNA2D3/SCN3B/FXYD6/CACNG8/CORIN/RANGRF/CACNB2/SLC8A3/SCN2B/TRPC1/FKBP1B/DSG2/DSC2/ATP2B4/NUP155/SRI/CACNA2D2/CACNA1C/ASPH/KCNQ1	32
BP	GO:0048588	developmental cell growth	44|2417	192|14725	0.0116343	0.164681	ENSG00000114251/ENSG00000124785/ENSG00000169554/ENSG00000131711/ENSG00000171517/ENSG00000119866/ENSG00000163623/ENSG00000143858/ENSG00000145147/ENSG00000158321/ENSG00000144868/ENSG00000198689/ENSG00000135333/ENSG00000075213/ENSG00000188729/ENSG00000133104/ENSG00000118257/ENSG00000143032/ENSG00000107295/ENSG00000154556/ENSG00000010319/ENSG00000149269/ENSG00000196338/ENSG00000076356/ENSG00000069482…	WNT5A/NRN1/ZEB2/MAP1B/LPAR3/BCL11A/NKX6-1/SYT2/SLIT2/AUTS2/TMEM108/SLC9A6/EPHA7/SEMA3A/OSTN/SPART/NRP2/BARHL2/SH3GL2/SORBS2/SEMA3G/PAK1/NLGN3/PLXNA2/GAL/WASF1/FLRT3/RGMA/EMX1/RIMS2/CAV3/SLIT3/C9orf72/SYT17/RUFY3/DDX39B/RIMS1/VCL/TTL/WNT3A/AKAP6/USP9X/ARIH2/PRKN	44
BP	GO:0014857	regulation of skeletal muscle cell proliferation	6|2417	13|14725	0.011719	0.164681	ENSG00000138685/ENSG00000154928/ENSG00000154188/ENSG00000126778/ENSG00000138379/ENSG00000159086	FGF2/EPHB1/ANGPT1/SIX1/MSTN/PAXBP1	6
BP	GO:0030949	positive regulation of vascular endothelial growth factor receptor signaling pathway	6|2417	13|14725	0.011719	0.164681	ENSG00000102755/ENSG00000166501/ENSG00000106070/ENSG00000102678/ENSG00000161638/ENSG00000207744	FLT1/PRKCB/GRB10/FGF9/ITGA5/MIR10B	6
BP	GO:0060579	ventral spinal cord interneuron fate commitment	6|2417	13|14725	0.011719	0.164681	ENSG00000074047/ENSG00000007372/ENSG00000163623/ENSG00000125820/ENSG00000139445/ENSG00000064218	GLI2/PAX6/NKX6-1/NKX2-2/FOXN4/DMRT3	6
BP	GO:0060581	cell fate commitment involved in pattern specification	6|2417	13|14725	0.011719	0.164681	ENSG00000074047/ENSG00000007372/ENSG00000163623/ENSG00000125820/ENSG00000139445/ENSG00000064218	GLI2/PAX6/NKX6-1/NKX2-2/FOXN4/DMRT3	6
BP	GO:0060788	ectodermal placode formation	6|2417	13|14725	0.011719	0.164681	ENSG00000117707/ENSG00000126778/ENSG00000196591/ENSG00000158813/ENSG00000116478/ENSG00000135111	PROX1/SIX1/HDAC2/EDA/HDAC1/TBX3	6
BP	GO:0071697	ectodermal placode morphogenesis	6|2417	13|14725	0.011719	0.164681	ENSG00000117707/ENSG00000126778/ENSG00000196591/ENSG00000158813/ENSG00000116478/ENSG00000135111	PROX1/SIX1/HDAC2/EDA/HDAC1/TBX3	6
BP	GO:0072189	ureter development	6|2417	13|14725	0.011719	0.164681	ENSG00000128918/ENSG00000103241/ENSG00000005513/ENSG00000075891/ENSG00000126778/ENSG00000143867	ALDH1A2/FOXF1/SOX8/PAX2/SIX1/OSR1	6
BP	GO:0050805	negative regulation of synaptic transmission	17|2417	59|14725	0.0118568	0.166202	ENSG00000127955/ENSG00000145335/ENSG00000114200/ENSG00000108576/ENSG00000196338/ENSG00000188906/ENSG00000152208/ENSG00000166664/ENSG00000102924/ENSG00000163686/ENSG00000073756/ENSG00000157103/ENSG00000087053/ENSG00000102081/ENSG00000101489/ENSG00000132718/ENSG00000185345	GNAI1/SNCA/BCHE/SLC6A4/NLGN3/LRRK2/GRID2/CHRFAM7A/CBLN1/ABHD6/PTGS2/SLC6A1/MTMR2/FMR1/CELF4/SYT11/PRKN	17
BP	GO:0042073	intraciliary transport	15|2417	50|14725	0.0119609	0.167245	ENSG00000187240/ENSG00000075945/ENSG00000117245/ENSG00000118965/ENSG00000122970/ENSG00000181004/ENSG00000131437/ENSG00000138036/ENSG00000081870/ENSG00000157796/ENSG00000117155/ENSG00000204104/ENSG00000156313/ENSG00000083312/ENSG00000068885	DYNC2H1/KIFAP3/KIF17/WDR35/IFT81/BBS12/KIF3A/DYNC2LI1/HSPB11/WDR19/SSX2IP/TRAF3IP1/RPGR/TNPO1/IFT80	15
BP	GO:0007601	visual perception	39|2417	167|14725	0.0123866	0.172767	ENSG00000050555/ENSG00000182963/ENSG00000007372/ENSG00000112319/ENSG00000107736/ENSG00000095777/ENSG00000075891/ENSG00000138686/ENSG00000099204/ENSG00000139219/ENSG00000131480/ENSG00000112333/ENSG00000121743/ENSG00000113966/ENSG00000145476/ENSG00000170264/ENSG00000043355/ENSG00000165995/ENSG00000137955/ENSG00000183423/ENSG00000180376/ENSG00000188107/ENSG00000106536/ENSG00000128617/ENSG00000198963…	LAMC3/GJC1/PAX6/EYA4/CDH23/MYO3A/PAX2/BBS7/ABLIM1/COL2A1/AOC2/NR2E1/GJA3/ARL6/CYP4V2/FAM161A/ZIC2/CACNB2/RABGGTB/LRIT3/CCDC66/EYS/POU6F2/OPN1SW/RORB/EYA3/RGS9/RP2/SIX3/OAT/RPGR/CHM/RIMS1/TIMP3/GABRR2/RDH10/RRH/SLC45A2/PDE6C	39
BP	GO:0003143	embryonic heart tube morphogenesis	18|2417	64|14725	0.0126872	0.176521	ENSG00000152661/ENSG00000162738/ENSG00000128602/ENSG00000114251/ENSG00000183072/ENSG00000113196/ENSG00000164107/ENSG00000138136/ENSG00000081189/ENSG00000138686/ENSG00000164532/ENSG00000139445/ENSG00000156925/ENSG00000131437/ENSG00000154342/ENSG00000101752/ENSG00000284862/ENSG00000135111	GJA1/VANGL2/SMO/WNT5A/NKX2-5/HAND1/HAND2/LBX1/MEF2C/BBS7/TBX20/FOXN4/ZIC3/KIF3A/WNT3A/MIB1/CCDC39/TBX3	18
BP	GO:0003015	heart process	53|2417	240|14725	0.0127903	0.177516	ENSG00000152661/ENSG00000233276/ENSG00000145362/ENSG00000182963/ENSG00000112276/ENSG00000184185/ENSG00000183072/ENSG00000183873/ENSG00000087258/ENSG00000182389/ENSG00000148408/ENSG00000153956/ENSG00000183023/ENSG00000213366/ENSG00000108984/ENSG00000198947/ENSG00000154639/ENSG00000075213/ENSG00000116741/ENSG00000048740/ENSG00000134548/ENSG00000129244/ENSG00000155657/ENSG00000177098/ENSG00000157445…	GJA1/GPX1/ANK2/GJC1/BVES/KCNJ12/NKX2-5/SCN5A/GNAO1/CACNB4/CACNA1B/CACNA2D1/SLC8A1/GSTM2/MAP2K6/DMD/CXADR/SEMA3A/RGS2/CELF2/SPX/ATP1B2/TTN/SCN4B/CACNA2D3/SCN3B/FXYD6/SLC1A1/CACNG8/CORIN/APLN/FOXN4/RANGRF/CACNB2/CAV3/SLC8A3/SCN2B/TRPC1/FKBP1B/DSG2/DSC2/AVPR1A/CHRNA7/PDE4B/NMU/ATP2B4/NUP155/SRI/CACNA2D2/CACNA1C/CLIC2/ASPH/KCNQ1	53
BP	GO:0035725	sodium ion transmembrane transport	29|2417	117|14725	0.0128499	0.177713	ENSG00000089327/ENSG00000196632/ENSG00000183873/ENSG00000183023/ENSG00000198689/ENSG00000198947/ENSG00000136531/ENSG00000140090/ENSG00000180881/ENSG00000181804/ENSG00000129244/ENSG00000177098/ENSG00000152818/ENSG00000166257/ENSG00000137726/ENSG00000007314/ENSG00000108961/ENSG00000182533/ENSG00000169432/ENSG00000100678/ENSG00000149575/ENSG00000153253/ENSG00000171208/ENSG00000135740/ENSG00000164038…	FXYD5/WNK3/SCN5A/SLC8A1/SLC9A6/DMD/SCN2A/SLC24A4/CAPS2/SLC9A9/ATP1B2/SCN4B/UTRN/SCN3B/FXYD6/SCN4A/RANGRF/CAV3/SCN9A/SLC8A3/SCN2B/SCN3A/NETO2/SLC9A5/SLC9B2/ATP2B4/SLC9B1/OSR1/SCN11A	29
BP	GO:0030509	BMP signaling pathway	34|2417	142|14725	0.0128677	0.177713	ENSG00000163430/ENSG00000147257/ENSG00000143869/ENSG00000114251/ENSG00000183072/ENSG00000069702/ENSG00000138795/ENSG00000174460/ENSG00000105880/ENSG00000133104/ENSG00000104332/ENSG00000120693/ENSG00000170801/ENSG00000101938/ENSG00000166292/ENSG00000166707/ENSG00000141622/ENSG00000134569/ENSG00000163132/ENSG00000171243/ENSG00000153162/ENSG00000182175/ENSG00000188779/ENSG00000169071/ENSG00000266524…	FSTL1/GPC3/GDF7/WNT5A/NKX2-5/TGFBR3/LEF1/ZCCHC12/DLX5/SPART/SFRP1/SMAD9/HTRA3/CHRDL1/TMEM100/ZCCHC18/RNF165/LRP4/MSX1/SOSTDC1/BMP6/RGMA/SKOR1/ROR2/GDF10/BMPER/GDF6/ACVR2B/NOG/TBXT/RBPMS2/SULF1/FBN1/USP9X	34
BP	GO:0001938	positive regulation of endothelial cell proliferation	22|2417	83|14725	0.0130088	0.178069	ENSG00000114251/ENSG00000037280/ENSG00000138685/ENSG00000119630/ENSG00000117707/ENSG00000101445/ENSG00000118257/ENSG00000165757/ENSG00000117020/ENSG00000113296/ENSG00000153162/ENSG00000184304/ENSG00000171388/ENSG00000144891/ENSG00000239697/ENSG00000100292/ENSG00000143494/ENSG00000165197/ENSG00000207744/ENSG00000154229/ENSG00000096717/ENSG00000177606	WNT5A/FLT4/FGF2/PGF/PROX1/PPP1R16B/NRP2/JCAD/AKT3/THBS4/BMP6/PRKD1/APLN/AGTR1/TNFSF12/HMOX1/VASH2/VEGFD/MIR10B/PRKCA/SIRT1/JUN	22
BP	GO:0022404	molting cycle process	22|2417	83|14725	0.0130088	0.178069	ENSG00000162738/ENSG00000128602/ENSG00000052850/ENSG00000114251/ENSG00000164066/ENSG00000178919/ENSG00000139292/ENSG00000156535/ENSG00000133710/ENSG00000134569/ENSG00000125285/ENSG00000171243/ENSG00000069482/ENSG00000162601/ENSG00000127863/ENSG00000196591/ENSG00000158813/ENSG00000146648/ENSG00000169884/ENSG00000116478/ENSG00000151748/ENSG00000104290	VANGL2/SMO/ALX4/WNT5A/INTU/FOXE1/LGR5/CD109/SPINK5/LRP4/SOX21/SOSTDC1/GAL/MYSM1/TNFRSF19/HDAC2/EDA/EGFR/WNT10B/HDAC1/SAV1/FZD3	22
BP	GO:0022405	hair cycle process	22|2417	83|14725	0.0130088	0.178069	ENSG00000162738/ENSG00000128602/ENSG00000052850/ENSG00000114251/ENSG00000164066/ENSG00000178919/ENSG00000139292/ENSG00000156535/ENSG00000133710/ENSG00000134569/ENSG00000125285/ENSG00000171243/ENSG00000069482/ENSG00000162601/ENSG00000127863/ENSG00000196591/ENSG00000158813/ENSG00000146648/ENSG00000169884/ENSG00000116478/ENSG00000151748/ENSG00000104290	VANGL2/SMO/ALX4/WNT5A/INTU/FOXE1/LGR5/CD109/SPINK5/LRP4/SOX21/SOSTDC1/GAL/MYSM1/TNFRSF19/HDAC2/EDA/EGFR/WNT10B/HDAC1/SAV1/FZD3	22
BP	GO:0030850	prostate gland development	14|2417	46|14725	0.0130795	0.178069	ENSG00000074047/ENSG00000159184/ENSG00000181690/ENSG00000128714/ENSG00000114251/ENSG00000185920/ENSG00000132386/ENSG00000104332/ENSG00000041982/ENSG00000183691/ENSG00000111087/ENSG00000137573/ENSG00000172201/ENSG00000179593	GLI2/HOXB13/PLAG1/HOXD13/WNT5A/PTCH1/SERPINF1/SFRP1/TNC/NOG/GLI1/SULF1/ID4/ALOX15B	14
BP	GO:0006940	regulation of smooth muscle contraction	16|2417	55|14725	0.0130936	0.178069	ENSG00000181104/ENSG00000138193/ENSG00000116741/ENSG00000157404/ENSG00000134548/ENSG00000182674/ENSG00000185532/ENSG00000133019/ENSG00000164116/ENSG00000128512/ENSG00000064989/ENSG00000170425/ENSG00000073756/ENSG00000163421/ENSG00000109255/ENSG00000080644	F2R/PLCE1/RGS2/KIT/SPX/KCNB2/PRKG1/CHRM3/GUCY1A1/DOCK4/CALCRL/ADORA2B/PTGS2/PROK2/NMU/CHRNA3	16
BP	GO:0030574	collagen catabolic process	16|2417	55|14725	0.0130936	0.178069	ENSG00000134871/ENSG00000156140/ENSG00000197565/ENSG00000187498/ENSG00000188517/ENSG00000160963/ENSG00000197467/ENSG00000188153/ENSG00000087116/ENSG00000204262/ENSG00000087245/ENSG00000139219/ENSG00000082293/ENSG00000142156/ENSG00000172752/ENSG00000144810	COL4A2/ADAMTS3/COL4A6/COL4A1/COL25A1/COL26A1/COL13A1/COL4A5/ADAMTS2/COL5A2/MMP2/COL2A1/COL19A1/COL6A1/COL6A5/COL8A1	16
BP	GO:0003230	cardiac atrium development	11|2417	33|14725	0.0131469	0.178069	ENSG00000145362/ENSG00000128602/ENSG00000114251/ENSG00000183072/ENSG00000016082/ENSG00000117707/ENSG00000173706/ENSG00000164093/ENSG00000168779/ENSG00000164532/ENSG00000183691	ANK2/SMO/WNT5A/NKX2-5/ISL1/PROX1/HEG1/PITX2/SHOX2/TBX20/NOG	11
BP	GO:1900274	regulation of phospholipase C activity	11|2417	33|14725	0.0131469	0.178069	ENSG00000102755/ENSG00000138685/ENSG00000198121/ENSG00000078549/ENSG00000157404/ENSG00000134853/ENSG00000166148/ENSG00000171596/ENSG00000146648/ENSG00000113721/ENSG00000151617	FLT1/FGF2/LPAR1/ADCYAP1R1/KIT/PDGFRA/AVPR1A/NMUR1/EGFR/PDGFRB/EDNRA	11
BP	GO:0003094	glomerular filtration	7|2417	17|14725	0.0134842	0.180463	ENSG00000152661/ENSG00000076706/ENSG00000181104/ENSG00000151490/ENSG00000174059/ENSG00000181408/ENSG00000137573	GJA1/MCAM/F2R/PTPRO/CD34/UTS2R/SULF1	7
BP	GO:0008356	asymmetric cell division	7|2417	17|14725	0.0134842	0.180463	ENSG00000007372/ENSG00000134532/ENSG00000116641/ENSG00000109906/ENSG00000204531/ENSG00000066279/ENSG00000169220	PAX6/SOX5/DOCK7/ZBTB16/POU5F1/ASPM/RGS14	7
BP	GO:0023019	signal transduction involved in regulation of gene expression	7|2417	17|14725	0.0134842	0.180463	ENSG00000169860/ENSG00000007372/ENSG00000143799/ENSG00000138675/ENSG00000163132/ENSG00000134853/ENSG00000164458	P2RY1/PAX6/PARP1/FGF5/MSX1/PDGFRA/TBXT	7
BP	GO:0060602	branch elongation of an epithelium	7|2417	17|14725	0.0134842	0.180463	ENSG00000128714/ENSG00000114251/ENSG00000126778/ENSG00000136158/ENSG00000041982/ENSG00000125686/ENSG00000121039	HOXD13/WNT5A/SIX1/SPRY2/TNC/MED1/RDH10	7
BP	GO:2000773	negative regulation of cellular senescence	7|2417	17|14725	0.0134842	0.180463	ENSG00000149948/ENSG00000122691/ENSG00000117020/ENSG00000196660/ENSG00000189298/ENSG00000253729/ENSG00000096717	HMGA2/TWIST1/AKT3/SLC30A10/ZKSCAN3/PRKDC/SIRT1	7
BP	GO:0034762	regulation of transmembrane transport	92|2417	451|14725	0.0136807	0.182659	ENSG00000152661/ENSG00000147257/ENSG00000089327/ENSG00000145362/ENSG00000196730/ENSG00000196632/ENSG00000022267/ENSG00000184185/ENSG00000181104/ENSG00000010810/ENSG00000183873/ENSG00000145335/ENSG00000182389/ENSG00000153291/ENSG00000185760/ENSG00000122691/ENSG00000148408/ENSG00000153956/ENSG00000183023/ENSG00000169760/ENSG00000166501/ENSG00000213366/ENSG00000077522/ENSG00000116396/ENSG00000198947…	GJA1/GPC3/FXYD5/ANK2/DAPK1/WNK3/FHL1/KCNJ12/F2R/FYN/SCN5A/SNCA/CACNB4/SLC25A27/KCNQ5/TWIST1/CACNA1B/CACNA2D1/SLC8A1/NLGN1/PRKCB/GSTM2/ACTN2/KCNC4/DMD/ABCB1/MEF2C/OSTN/SCN2A/KCNC1/KCNB2/AKAP7/ATP1B2/CD19/SCN4B/UBASH3B/KCNQ2/KCNA3/UTRN/CACNA2D3/SCN3B/FXYD6/PAK1/CACNG8/PM20D1/CA2/AZIN2/NLGN3/PRKD1/GAL/GALNT8/SCN4A/RANGRF/KCNA2/CACNB2/KCNG3/CAV3/GRB10/SCN9A/SCN2B/TRPC1/GOPC/FKBP1B/XCL1/CHRFAM7A/SORBS…	92
BP	GO:0003203	endocardial cushion morphogenesis	10|2417	29|14725	0.0137907	0.182824	ENSG00000164683/ENSG00000019549/ENSG00000016082/ENSG00000122691/ENSG00000166341/ENSG00000166292/ENSG00000164532/ENSG00000163132/ENSG00000163909/ENSG00000183691	HEY1/SNAI2/ISL1/TWIST1/DCHS1/TMEM100/TBX20/MSX1/HEYL/NOG	10
BP	GO:0003209	cardiac atrium morphogenesis	10|2417	29|14725	0.0137907	0.182824	ENSG00000128602/ENSG00000114251/ENSG00000183072/ENSG00000016082/ENSG00000117707/ENSG00000173706/ENSG00000164093/ENSG00000168779/ENSG00000164532/ENSG00000183691	SMO/WNT5A/NKX2-5/ISL1/PROX1/HEG1/PITX2/SHOX2/TBX20/NOG	10
BP	GO:0010543	regulation of platelet activation	10|2417	29|14725	0.0137907	0.182824	ENSG00000162493/ENSG00000065675/ENSG00000135919/ENSG00000154127/ENSG00000185532/ENSG00000134853/ENSG00000173918/ENSG00000254087/ENSG00000154229/ENSG00000115956	PDPN/PRKCQ/SERPINE2/UBASH3B/PRKG1/PDGFRA/C1QTNF1/LYN/PRKCA/PLEK	10
BP	GO:0003279	cardiac septum development	25|2417	98|14725	0.0139359	0.184315	ENSG00000164683/ENSG00000162738/ENSG00000184058/ENSG00000145362/ENSG00000128602/ENSG00000114251/ENSG00000183072/ENSG00000103449/ENSG00000069702/ENSG00000016082/ENSG00000077092/ENSG00000099139/ENSG00000169946/ENSG00000117707/ENSG00000113196/ENSG00000173706/ENSG00000164093/ENSG00000118257/ENSG00000133026/ENSG00000164532/ENSG00000163909/ENSG00000135766/ENSG00000183691/ENSG00000151748/ENSG00000135111	HEY1/VANGL2/TBX1/ANK2/SMO/WNT5A/NKX2-5/SALL1/TGFBR3/ISL1/RARB/PCSK5/ZFPM2/PROX1/HAND1/HEG1/PITX2/NRP2/MYH10/TBX20/HEYL/EGLN1/NOG/SAV1/TBX3	25
BP	GO:0051354	negative regulation of oxidoreductase activity	8|2417	21|14725	0.0141761	0.185225	ENSG00000145335/ENSG00000131471/ENSG00000162676/ENSG00000182533/ENSG00000188906/ENSG00000058668/ENSG00000102393/ENSG00000185345	SNCA/AOC3/GFI1/CAV3/LRRK2/ATP2B4/GLA/PRKN	8
BP	GO:0030878	thyroid gland development	9|2417	25|14725	0.0141906	0.185225	ENSG00000184058/ENSG00000106004/ENSG00000105997/ENSG00000183072/ENSG00000120093/ENSG00000178919/ENSG00000136352/ENSG00000126778/ENSG00000128652	TBX1/HOXA5/HOXA3/NKX2-5/HOXB3/FOXE1/NKX2-1/SIX1/HOXD3	9
BP	GO:0009948	anterior/posterior axis specification	13|2417	42|14725	0.014248	0.185225	ENSG00000147257/ENSG00000116729/ENSG00000114251/ENSG00000165556/ENSG00000170577/ENSG00000184937/ENSG00000203877/ENSG00000165588/ENSG00000197121/ENSG00000175879/ENSG00000164458/ENSG00000121481/ENSG00000135111	GPC3/WLS/WNT5A/CDX2/SIX2/WT1/RIPPLY2/OTX2/PGAP1/HOXD8/TBXT/RNF2/TBX3	13
BP	GO:0050654	chondroitin sulfate proteoglycan metabolic process	13|2417	42|14725	0.014248	0.185225	ENSG00000038427/ENSG00000111817/ENSG00000198108/ENSG00000173376/ENSG00000122863/ENSG00000154080/ENSG00000164318/ENSG00000112309/ENSG00000107742/ENSG00000155893/ENSG00000116704/ENSG00000173546/ENSG00000169826	VCAN/DSE/CHSY3/NDNF/CHST3/CHST9/EGFLAM/B3GAT2/SPOCK2/PXYLP1/SLC35D1/CSPG4/CSGALNACT2	13
BP	GO:0055010	ventricular cardiac muscle tissue morphogenesis	13|2417	42|14725	0.014248	0.185225	ENSG00000152192/ENSG00000183072/ENSG00000069702/ENSG00000016082/ENSG00000169946/ENSG00000054598/ENSG00000117707/ENSG00000113196/ENSG00000173706/ENSG00000176692/ENSG00000183691/ENSG00000049883/ENSG00000125686	POU4F1/NKX2-5/TGFBR3/ISL1/ZFPM2/FOXC1/PROX1/HAND1/HEG1/FOXC2/NOG/PTCD2/MED1	13
BP	GO:0060043	regulation of cardiac muscle cell proliferation	13|2417	42|14725	0.014248	0.185225	ENSG00000152661/ENSG00000183072/ENSG00000069702/ENSG00000138685/ENSG00000169946/ENSG00000081189/ENSG00000164532/ENSG00000078900/ENSG00000143995/ENSG00000183691/ENSG00000102678/ENSG00000111087/ENSG00000151748	GJA1/NKX2-5/TGFBR3/FGF2/ZFPM2/MEF2C/TBX20/TP73/MEIS1/NOG/FGF9/GLI1/SAV1	13
BP	GO:1902305	regulation of sodium ion transmembrane transport	15|2417	51|14725	0.0144367	0.185225	ENSG00000089327/ENSG00000196632/ENSG00000183873/ENSG00000198947/ENSG00000129244/ENSG00000177098/ENSG00000152818/ENSG00000166257/ENSG00000137726/ENSG00000108961/ENSG00000182533/ENSG00000149575/ENSG00000171208/ENSG00000058668/ENSG00000143867	FXYD5/WNK3/SCN5A/DMD/ATP1B2/SCN4B/UTRN/SCN3B/FXYD6/RANGRF/CAV3/SCN2B/NETO2/ATP2B4/OSR1	15
BP	GO:0007512	adult heart development	5|2417	10|14725	0.014466	0.185225	ENSG00000152661/ENSG00000183072/ENSG00000164107/ENSG00000133026/ENSG00000159307	GJA1/NKX2-5/HAND2/MYH10/SCUBE1	5
BP	GO:0015791	polyol transport	5|2417	10|14725	0.014466	0.185225	ENSG00000158865/ENSG00000151229/ENSG00000197121/ENSG00000240583/ENSG00000198743	SLC5A11/SLC2A13/PGAP1/AQP1/SLC5A3	5
BP	GO:0019896	axonal transport of mitochondrion	5|2417	10|14725	0.014466	0.185225	ENSG00000154277/ENSG00000277586/ENSG00000137463/ENSG00000147642/ENSG00000149557	UCHL1/NEFL/MGARP/SYBU/FEZ1	5
BP	GO:0048845	venous blood vessel morphogenesis	5|2417	10|14725	0.014466	0.185225	ENSG00000117707/ENSG00000173706/ENSG00000164093/ENSG00000164532/ENSG00000183287	PROX1/HEG1/PITX2/TBX20/CCBE1	5
BP	GO:0060911	cardiac cell fate commitment	5|2417	10|14725	0.014466	0.185225	ENSG00000183072/ENSG00000016082/ENSG00000184937/ENSG00000154342/ENSG00000135111	NKX2-5/ISL1/WT1/WNT3A/TBX3	5
BP	GO:0072203	cell proliferation involved in metanephros development	5|2417	10|14725	0.014466	0.185225	ENSG00000147257/ENSG00000184937/ENSG00000185920/ENSG00000113721/ENSG00000143867	GPC3/WT1/PTCH1/PDGFRB/OSR1	5
BP	GO:1902668	negative regulation of axon guidance	5|2417	10|14725	0.014466	0.185225	ENSG00000114251/ENSG00000145147/ENSG00000075213/ENSG00000151490/ENSG00000154342	WNT5A/SLIT2/SEMA3A/PTPRO/WNT3A	5
BP	GO:0010975	regulation of neuron projection development	85|2417	414|14725	0.0147528	0.188467	ENSG00000115355/ENSG00000166313/ENSG00000277586/ENSG00000184486/ENSG00000114251/ENSG00000010810/ENSG00000072832/ENSG00000175745/ENSG00000185008/ENSG00000169554/ENSG00000154310/ENSG00000131711/ENSG00000171517/ENSG00000119866/ENSG00000163623/ENSG00000018236/ENSG00000169760/ENSG00000135298/ENSG00000143858/ENSG00000145147/ENSG00000198121/ENSG00000153707/ENSG00000132386/ENSG00000173376/ENSG00000198947…	CCDC88A/APBB1/NEFL/POU3F2/WNT5A/FYN/CRMP1/NR2F1/ROBO2/ZEB2/TNIK/MAP1B/LPAR3/BCL11A/NKX6-1/CNTN1/NLGN1/ADGRB3/SYT2/SLIT2/LPAR1/PTPRD/SERPINF1/NDNF/DMD/EPHA7/MEF2C/TUBB2B/SEMA3A/OSTN/SPART/SFRP1/CUX2/SHOX2/BHLHB9/SERPINI1/DNM3/BARHL2/LRRC7/SEMA3G/LRP4/PRRX1/PAK1/NR2E1/NLGN3/ZNF804A/LTK/PRKD1/MIR221/PLXNA2/PAK3/RGMA/RIMS2/PAQR3/GFI1/CAPRIN2/LRRK2/RAP2A/FKBP1B/P3H1/GRID2/HDAC2/PTPRO/CAMK1/CNTF/NTRK2/…	85
BP	GO:0060349	bone morphogenesis	22|2417	84|14725	0.0149653	0.190748	ENSG00000005073/ENSG00000077092/ENSG00000122691/ENSG00000197467/ENSG00000054598/ENSG00000105880/ENSG00000081189/ENSG00000125813/ENSG00000168779/ENSG00000139219/ENSG00000105664/ENSG00000162551/ENSG00000163132/ENSG00000153162/ENSG00000203877/ENSG00000170961/ENSG00000003137/ENSG00000138386/ENSG00000196739/ENSG00000164458/ENSG00000112210/ENSG00000053254	HOXA11/RARB/TWIST1/COL13A1/FOXC1/DLX5/MEF2C/PAX1/SHOX2/COL2A1/COMP/ALPL/MSX1/BMP6/RIPPLY2/HAS2/CYP26B1/NAB1/COL27A1/TBXT/RAB23/FOXN3	22
BP	GO:1904705	regulation of vascular smooth muscle cell proliferation	12|2417	38|14725	0.0154417	0.195932	ENSG00000084207/ENSG00000138685/ENSG00000081189/ENSG00000087245/ENSG00000185532/ENSG00000149269/ENSG00000207870/ENSG00000171388/ENSG00000100292/ENSG00000102678/ENSG00000198563/ENSG00000177606	GSTP1/FGF2/MEF2C/MMP2/PRKG1/PAK1/MIR221/APLN/HMOX1/FGF9/DDX39B/JUN	12
BP	GO:1990874	vascular smooth muscle cell proliferation	12|2417	38|14725	0.0154417	0.195932	ENSG00000084207/ENSG00000138685/ENSG00000081189/ENSG00000087245/ENSG00000185532/ENSG00000149269/ENSG00000207870/ENSG00000171388/ENSG00000100292/ENSG00000102678/ENSG00000198563/ENSG00000177606	GSTP1/FGF2/MEF2C/MMP2/PRKG1/PAK1/MIR221/APLN/HMOX1/FGF9/DDX39B/JUN	12
BP	GO:0043536	positive regulation of blood vessel endothelial cell migration	16|2417	56|14725	0.0156095	0.197582	ENSG00000138685/ENSG00000101017/ENSG00000134954/ENSG00000165757/ENSG00000117020/ENSG00000154188/ENSG00000184304/ENSG00000207870/ENSG00000048052/ENSG00000100292/ENSG00000176692/ENSG00000073756/ENSG00000207744/ENSG00000154229/ENSG00000166025/ENSG00000096717	FGF2/CD40/ETS1/JCAD/AKT3/ANGPT1/PRKD1/MIR221/HDAC9/HMOX1/FOXC2/PTGS2/MIR10B/PRKCA/AMOTL1/SIRT1	16
BP	GO:0048332	mesoderm morphogenesis	19|2417	70|14725	0.0156421	0.197582	ENSG00000149948/ENSG00000116729/ENSG00000005073/ENSG00000114251/ENSG00000138795/ENSG00000170577/ENSG00000103241/ENSG00000054598/ENSG00000113196/ENSG00000104313/ENSG00000077943/ENSG00000075891/ENSG00000162367/ENSG00000164532/ENSG00000176692/ENSG00000183691/ENSG00000164458/ENSG00000154342/ENSG00000135111	HMGA2/WLS/HOXA11/WNT5A/LEF1/SIX2/FOXF1/FOXC1/HAND1/EYA1/ITGA8/PAX2/TAL1/TBX20/FOXC2/NOG/TBXT/WNT3A/TBX3	19
BP	GO:0051101	regulation of DNA binding	27|2417	109|14725	0.0160875	0.202745	ENSG00000149948/ENSG00000164683/ENSG00000128602/ENSG00000152192/ENSG00000016082/ENSG00000138795/ENSG00000122691/ENSG00000054598/ENSG00000113196/ENSG00000164107/ENSG00000164093/ENSG00000143799/ENSG00000121236/ENSG00000163132/ENSG00000186951/ENSG00000100292/ENSG00000196591/ENSG00000148143/ENSG00000184828/ENSG00000117650/ENSG00000075142/ENSG00000175595/ENSG00000137947/ENSG00000154342/ENSG00000177606…	HMGA2/HEY1/SMO/POU4F1/ISL1/LEF1/TWIST1/FOXC1/HAND1/HAND2/PITX2/PARP1/TRIM6/MSX1/PPARA/HMOX1/HDAC2/ZNF462/ZBTB7C/NEK2/SRI/ERCC4/GTF2B/WNT3A/JUN/PRKN/CSNK2B	27
BP	GO:0007605	sensory perception of sound	31|2417	129|14725	0.016123	0.202745	ENSG00000233276/ENSG00000079215/ENSG00000184058/ENSG00000019549/ENSG00000144488/ENSG00000105991/ENSG00000185483/ENSG00000135903/ENSG00000166402/ENSG00000105928/ENSG00000112319/ENSG00000107736/ENSG00000095777/ENSG00000006611/ENSG00000104313/ENSG00000157404/ENSG00000139219/ENSG00000112320/ENSG00000188162/ENSG00000100473/ENSG00000126778/ENSG00000197121/ENSG00000136158/ENSG00000106976/ENSG00000166866…	GPX1/SLC1A3/TBX1/SNAI2/ESPNL/HOXA1/ROR1/PAX3/TUB/GSDME/EYA4/CDH23/MYO3A/USH1C/EYA1/KIT/COL2A1/SOBP/OTOG/COCH/SIX1/PGAP1/SPRY2/DNM1/MYO1A/BIRC5/TMIE/SLC26A4/PJVK/PDZD7/KCNQ1	31
BP	GO:1904888	cranial skeletal system development	17|2417	61|14725	0.0166112	0.207594	ENSG00000184058/ENSG00000105991/ENSG00000122691/ENSG00000170577/ENSG00000081189/ENSG00000178919/ENSG00000115844/ENSG00000174705/ENSG00000116132/ENSG00000105996/ENSG00000126778/ENSG00000176692/ENSG00000134853/ENSG00000157796/ENSG00000112210/ENSG00000053254/ENSG00000121039	TBX1/HOXA1/TWIST1/SIX2/MEF2C/FOXE1/DLX2/SH3PXD2B/PRRX1/HOXA2/SIX1/FOXC2/PDGFRA/WDR19/RAB23/FOXN3/RDH10	17
BP	GO:0086091	regulation of heart rate by cardiac conduction	11|2417	34|14725	0.0166193	0.207594	ENSG00000145362/ENSG00000183873/ENSG00000153956/ENSG00000177098/ENSG00000166257/ENSG00000165995/ENSG00000149575/ENSG00000046604/ENSG00000134755/ENSG00000151067/ENSG00000053918	ANK2/SCN5A/CACNA2D1/SCN4B/SCN3B/CACNB2/SCN2B/DSG2/DSC2/CACNA1C/KCNQ1	11
BP	GO:1903672	positive regulation of sprouting angiogenesis	11|2417	34|14725	0.0166193	0.207594	ENSG00000138685/ENSG00000101445/ENSG00000165757/ENSG00000117020/ENSG00000048052/ENSG00000144891/ENSG00000100292/ENSG00000176692/ENSG00000073756/ENSG00000161638/ENSG00000207744	FGF2/PPP1R16B/JCAD/AKT3/HDAC9/AGTR1/HMOX1/FOXC2/PTGS2/ITGA5/MIR10B	11
BP	GO:0042136	neurotransmitter biosynthetic process	21|2417	80|14725	0.0167428	0.208673	ENSG00000079215/ENSG00000079931/ENSG00000081181/ENSG00000007171/ENSG00000108576/ENSG00000118965/ENSG00000163661/ENSG00000174130/ENSG00000196689/ENSG00000069667/ENSG00000124212/ENSG00000228716/ENSG00000153904/ENSG00000073756/ENSG00000129167/ENSG00000174059/ENSG00000058668/ENSG00000136750/ENSG00000102393/ENSG00000143149/ENSG00000213722	SLC1A3/MOXD1/ARG2/NOS2/SLC6A4/WDR35/PTX3/TLR6/TRPV1/RORA/PTGIS/DHFR/DDAH1/PTGS2/TPH1/CD34/ATP2B4/GAD2/GLA/ALDH9A1/DDAH2	21
BP	GO:0060038	cardiac muscle cell proliferation	15|2417	52|14725	0.0172905	0.215023	ENSG00000152661/ENSG00000183072/ENSG00000069702/ENSG00000138685/ENSG00000169946/ENSG00000054598/ENSG00000081189/ENSG00000164532/ENSG00000078900/ENSG00000143995/ENSG00000176692/ENSG00000183691/ENSG00000102678/ENSG00000111087/ENSG00000151748	GJA1/NKX2-5/TGFBR3/FGF2/ZFPM2/FOXC1/MEF2C/TBX20/TP73/MEIS1/FOXC2/NOG/FGF9/GLI1/SAV1	15
BP	GO:0033151	V(D)J recombination	6|2417	14|14725	0.0177026	0.216445	ENSG00000138795/ENSG00000081059/ENSG00000149311/ENSG00000166349/ENSG00000070501/ENSG00000253729	LEF1/TCF7/ATM/RAG1/POLB/PRKDC	6
BP	GO:0060347	heart trabecula formation	6|2417	14|14725	0.0177026	0.216445	ENSG00000164683/ENSG00000154734/ENSG00000183072/ENSG00000069702/ENSG00000182533/ENSG00000135766	HEY1/ADAMTS1/NKX2-5/TGFBR3/CAV3/EGLN1	6
BP	GO:0071696	ectodermal placode development	6|2417	14|14725	0.0177026	0.216445	ENSG00000117707/ENSG00000126778/ENSG00000196591/ENSG00000158813/ENSG00000116478/ENSG00000135111	PROX1/SIX1/HDAC2/EDA/HDAC1/TBX3	6
BP	GO:0072224	metanephric glomerulus development	6|2417	14|14725	0.0177026	0.216445	ENSG00000184937/ENSG00000075891/ENSG00000134853/ENSG00000174059/ENSG00000113721/ENSG00000143867	WT1/PAX2/PDGFRA/CD34/PDGFRB/OSR1	6
BP	GO:0048333	mesodermal cell differentiation	10|2417	30|14725	0.017713	0.216445	ENSG00000149948/ENSG00000005073/ENSG00000170577/ENSG00000103241/ENSG00000104313/ENSG00000077943/ENSG00000075891/ENSG00000162367/ENSG00000176692/ENSG00000154342	HMGA2/HOXA11/SIX2/FOXF1/EYA1/ITGA8/PAX2/TAL1/FOXC2/WNT3A	10
BP	GO:0050650	chondroitin sulfate proteoglycan biosynthetic process	10|2417	30|14725	0.017713	0.216445	ENSG00000038427/ENSG00000111817/ENSG00000198108/ENSG00000122863/ENSG00000154080/ENSG00000112309/ENSG00000155893/ENSG00000116704/ENSG00000173546/ENSG00000169826	VCAN/DSE/CHSY3/CHST3/CHST9/B3GAT2/PXYLP1/SLC35D1/CSPG4/CSGALNACT2	10
BP	GO:0060325	face morphogenesis	10|2417	30|14725	0.017713	0.216445	ENSG00000184058/ENSG00000138795/ENSG00000105880/ENSG00000109063/ENSG00000121005/ENSG00000087245/ENSG00000163132/ENSG00000134853/ENSG00000183691/ENSG00000198363	TBX1/LEF1/DLX5/MYH3/CRISPLD1/MMP2/MSX1/PDGFRA/NOG/ASPH	10
BP	GO:0071542	dopaminergic neuron differentiation	10|2417	30|14725	0.017713	0.216445	ENSG00000114251/ENSG00000163064/ENSG00000142700/ENSG00000104332/ENSG00000107859/ENSG00000165588/ENSG00000165409/ENSG00000165197/ENSG00000185267/ENSG00000154342	WNT5A/EN1/DMRTA2/SFRP1/PITX3/OTX2/TSHR/VEGFD/CDNF/WNT3A	10
BP	GO:0003231	cardiac ventricle development	27|2417	110|14725	0.0180798	0.220448	ENSG00000164683/ENSG00000162738/ENSG00000152192/ENSG00000114251/ENSG00000183072/ENSG00000103449/ENSG00000069702/ENSG00000016082/ENSG00000183873/ENSG00000103241/ENSG00000169946/ENSG00000054598/ENSG00000117707/ENSG00000113196/ENSG00000164107/ENSG00000081189/ENSG00000173706/ENSG00000164093/ENSG00000164532/ENSG00000163909/ENSG00000176692/ENSG00000135766/ENSG00000183691/ENSG00000151748/ENSG00000049883…	HEY1/VANGL2/POU4F1/WNT5A/NKX2-5/SALL1/TGFBR3/ISL1/SCN5A/FOXF1/ZFPM2/FOXC1/PROX1/HAND1/HAND2/MEF2C/HEG1/PITX2/TBX20/HEYL/FOXC2/EGLN1/NOG/SAV1/PTCD2/MED1/TBX3	27
BP	GO:0033555	multicellular organismal response to stress	16|2417	57|14725	0.0184833	0.223654	ENSG00000152661/ENSG00000148408/ENSG00000078549/ENSG00000081189/ENSG00000136160/ENSG00000112333/ENSG00000113296/ENSG00000196689/ENSG00000104321/ENSG00000166349/ENSG00000169432/ENSG00000147246/ENSG00000108306/ENSG00000198400/ENSG00000171532/ENSG00000078668	GJA1/CACNA1B/ADCYAP1R1/MEF2C/EDNRB/NR2E1/THBS4/TRPV1/TRPA1/RAG1/SCN9A/HTR2C/FBXL20/NTRK1/NEUROD2/VDAC3	16
BP	GO:0048645	animal organ formation	16|2417	57|14725	0.0184833	0.223654	ENSG00000074047/ENSG00000105997/ENSG00000005073/ENSG00000114251/ENSG00000016082/ENSG00000184937/ENSG00000164107/ENSG00000081189/ENSG00000104313/ENSG00000075891/ENSG00000109705/ENSG00000126778/ENSG00000183691/ENSG00000137573/ENSG00000154342/ENSG00000121039	GLI2/HOXA3/HOXA11/WNT5A/ISL1/WT1/HAND2/MEF2C/EYA1/PAX2/NKX3-2/SIX1/NOG/SULF1/WNT3A/RDH10	16
BP	GO:0010575	positive regulation of vascular endothelial growth factor production	9|2417	26|14725	0.0186125	0.223654	ENSG00000037280/ENSG00000016082/ENSG00000170425/ENSG00000069667/ENSG00000183287/ENSG00000073756/ENSG00000007952/ENSG00000012048/ENSG00000137573	FLT4/ISL1/ADORA2B/RORA/CCBE1/PTGS2/NOX1/BRCA1/SULF1	9
BP	GO:0014808	release of sequestered calcium ion into cytosol by sarcoplasmic reticulum	9|2417	26|14725	0.0186125	0.223654	ENSG00000145362/ENSG00000183023/ENSG00000213366/ENSG00000198947/ENSG00000119782/ENSG00000075142/ENSG00000151067/ENSG00000155962/ENSG00000151320	ANK2/SLC8A1/GSTM2/DMD/FKBP1B/SRI/CACNA1C/CLIC2/AKAP6	9
BP	GO:0060512	prostate gland morphogenesis	9|2417	26|14725	0.0186125	0.223654	ENSG00000074047/ENSG00000159184/ENSG00000128714/ENSG00000114251/ENSG00000104332/ENSG00000041982/ENSG00000183691/ENSG00000137573/ENSG00000172201	GLI2/HOXB13/HOXD13/WNT5A/SFRP1/TNC/NOG/SULF1/ID4	9
BP	GO:1903514	release of sequestered calcium ion into cytosol by endoplasmic reticulum	9|2417	26|14725	0.0186125	0.223654	ENSG00000145362/ENSG00000183023/ENSG00000213366/ENSG00000198947/ENSG00000119782/ENSG00000075142/ENSG00000151067/ENSG00000155962/ENSG00000151320	ANK2/SLC8A1/GSTM2/DMD/FKBP1B/SRI/CACNA1C/CLIC2/AKAP6	9
BP	GO:0010881	regulation of cardiac muscle contraction by regulation of the release of sequestered calcium ion	7|2417	18|14725	0.0189971	0.223654	ENSG00000145362/ENSG00000183023/ENSG00000213366/ENSG00000198947/ENSG00000119782/ENSG00000151067/ENSG00000155962	ANK2/SLC8A1/GSTM2/DMD/FKBP1B/CACNA1C/CLIC2	7
BP	GO:0048339	paraxial mesoderm development	7|2417	18|14725	0.0189971	0.223654	ENSG00000114251/ENSG00000138795/ENSG00000054598/ENSG00000090932/ENSG00000069248/ENSG00000176692/ENSG00000154342	WNT5A/LEF1/FOXC1/DLL3/NUP133/FOXC2/WNT3A	7
BP	GO:0051968	positive regulation of synaptic transmission, glutamatergic	7|2417	18|14725	0.0189971	0.223654	ENSG00000121297/ENSG00000169760/ENSG00000196338/ENSG00000169071/ENSG00000073756/ENSG00000146648/ENSG00000198400	TSHZ3/NLGN1/NLGN3/ROR2/PTGS2/EGFR/NTRK1	7
BP	GO:0060039	pericardium development	7|2417	18|14725	0.0189971	0.223654	ENSG00000114251/ENSG00000184937/ENSG00000164107/ENSG00000173706/ENSG00000164532/ENSG00000125848/ENSG00000103494	WNT5A/WT1/HAND2/HEG1/TBX20/FLRT3/RPGRIP1L	7
BP	GO:0072010	glomerular epithelium development	7|2417	18|14725	0.0189971	0.223654	ENSG00000184937/ENSG00000163884/ENSG00000054598/ENSG00000176692/ENSG00000151490/ENSG00000174059/ENSG00000102900	WT1/KLF15/FOXC1/FOXC2/PTPRO/CD34/NUP93	7
BP	GO:0072087	renal vesicle development	7|2417	18|14725	0.0189971	0.223654	ENSG00000128602/ENSG00000125931/ENSG00000103449/ENSG00000170577/ENSG00000005513/ENSG00000075891/ENSG00000143867	SMO/CITED1/SALL1/SIX2/SOX8/PAX2/OSR1	7
BP	GO:0097009	energy homeostasis	7|2417	18|14725	0.0189971	0.223654	ENSG00000116678/ENSG00000135324/ENSG00000162877/ENSG00000182747/ENSG00000162600/ENSG00000109255/ENSG00000137509	LEPR/MRAP2/PM20D1/SLC35D3/OMA1/NMU/PRCP	7
BP	GO:0097205	renal filtration	7|2417	18|14725	0.0189971	0.223654	ENSG00000152661/ENSG00000076706/ENSG00000181104/ENSG00000151490/ENSG00000174059/ENSG00000181408/ENSG00000137573	GJA1/MCAM/F2R/PTPRO/CD34/UTS2R/SULF1	7
BP	GO:0090329	regulation of DNA-dependent DNA replication	14|2417	48|14725	0.0191275	0.223654	ENSG00000276644/ENSG00000097046/ENSG00000153162/ENSG00000101972/ENSG00000161692/ENSG00000147601/ENSG00000111445/ENSG00000020922/ENSG00000075131/ENSG00000159147/ENSG00000163918/ENSG00000108055/ENSG00000197299/ENSG00000072501	DACH1/CDC7/BMP6/STAG2/DBF4B/TERF1/RFC5/MRE11/TIPIN/DONSON/RFC4/SMC3/BLM/SMC1A	14
BP	GO:0021511	spinal cord patterning	8|2417	22|14725	0.0191385	0.223654	ENSG00000128602/ENSG00000074047/ENSG00000007372/ENSG00000163623/ENSG00000164066/ENSG00000125820/ENSG00000139445/ENSG00000064218	SMO/GLI2/PAX6/NKX6-1/INTU/NKX2-2/FOXN4/DMRT3	8
BP	GO:0034110	regulation of homotypic cell-cell adhesion	8|2417	22|14725	0.0191385	0.223654	ENSG00000162493/ENSG00000065675/ENSG00000135919/ENSG00000154127/ENSG00000185532/ENSG00000173918/ENSG00000254087/ENSG00000154229	PDPN/PRKCQ/SERPINE2/UBASH3B/PRKG1/C1QTNF1/LYN/PRKCA	8
BP	GO:0044550	secondary metabolite biosynthetic process	8|2417	22|14725	0.0191385	0.223654	ENSG00000125931/ENSG00000114251/ENSG00000169554/ENSG00000116761/ENSG00000164039/ENSG00000104044/ENSG00000144935/ENSG00000164175	CITED1/WNT5A/ZEB2/CTH/BDH2/OCA2/TRPC1/SLC45A2	8
BP	GO:0090050	positive regulation of cell migration involved in sprouting angiogenesis	8|2417	22|14725	0.0191385	0.223654	ENSG00000138685/ENSG00000165757/ENSG00000117020/ENSG00000048052/ENSG00000100292/ENSG00000176692/ENSG00000073756/ENSG00000207744	FGF2/JCAD/AKT3/HDAC9/HMOX1/FOXC2/PTGS2/MIR10B	8
BP	GO:1901071	glucosamine-containing compound metabolic process	8|2417	22|14725	0.0191385	0.223654	ENSG00000162694/ENSG00000175040/ENSG00000183196/ENSG00000085465/ENSG00000159921/ENSG00000163281/ENSG00000140835/ENSG00000117151	EXTL2/CHST2/CHST6/OVGP1/GNE/GNPDA2/CHST4/CTBS	8
BP	GO:1990138	neuron projection extension	33|2417	141|14725	0.019549	0.227978	ENSG00000114251/ENSG00000124785/ENSG00000131711/ENSG00000119866/ENSG00000163623/ENSG00000143858/ENSG00000145147/ENSG00000158321/ENSG00000144868/ENSG00000198689/ENSG00000075213/ENSG00000188729/ENSG00000118257/ENSG00000143032/ENSG00000107295/ENSG00000010319/ENSG00000149269/ENSG00000196338/ENSG00000076356/ENSG00000112290/ENSG00000125848/ENSG00000135638/ENSG00000176406/ENSG00000184347/ENSG00000147894…	WNT5A/NRN1/MAP1B/BCL11A/NKX6-1/SYT2/SLIT2/AUTS2/TMEM108/SLC9A6/SEMA3A/OSTN/NRP2/BARHL2/SH3GL2/SEMA3G/PAK1/NLGN3/PLXNA2/WASF1/FLRT3/EMX1/RIMS2/SLIT3/C9orf72/SYT17/RUFY3/RIMS1/VCL/TTL/WNT3A/USP9X/PRKN	33
BP	GO:0043524	negative regulation of neuron apoptotic process	31|2417	131|14725	0.0199087	0.231691	ENSG00000277586/ENSG00000125931/ENSG00000152192/ENSG00000181104/ENSG00000010810/ENSG00000016082/ENSG00000145335/ENSG00000163064/ENSG00000171956/ENSG00000173376/ENSG00000081189/ENSG00000198908/ENSG00000154188/ENSG00000132821/ENSG00000078900/ENSG00000164778/ENSG00000122756/ENSG00000196660/ENSG00000100292/ENSG00000126778/ENSG00000205726/ENSG00000074317/ENSG00000242689/ENSG00000148053/ENSG00000023909…	NEFL/CITED1/POU4F1/F2R/FYN/ISL1/SNCA/EN1/FOXB1/NDNF/MEF2C/BHLHB9/ANGPT1/VSTM2L/TP73/EN2/CNTFR/SLC30A10/HMOX1/SIX1/ITSN1/SNCB/CNTF/NTRK2/GCLM/UNC5B/NTRK1/BIRC5/JUN/PRKN/MSH2	31
BP	GO:0007405	neuroblast proliferation	15|2417	53|14725	0.0205566	0.238736	ENSG00000128602/ENSG00000138795/ENSG00000007372/ENSG00000176165/ENSG00000148704/ENSG00000134532/ENSG00000142700/ENSG00000188906/ENSG00000116641/ENSG00000162946/ENSG00000066279/ENSG00000138083/ENSG00000172201/ENSG00000154342/ENSG00000104290	SMO/LEF1/PAX6/FOXG1/VAX1/SOX5/DMRTA2/LRRK2/DOCK7/DISC1/ASPM/SIX3/ID4/WNT3A/FZD3	15
BP	GO:0072210	metanephric nephron development	11|2417	35|14725	0.0207329	0.239794	ENSG00000128602/ENSG00000125931/ENSG00000103449/ENSG00000170577/ENSG00000005513/ENSG00000184937/ENSG00000075891/ENSG00000134853/ENSG00000174059/ENSG00000113721/ENSG00000143867	SMO/CITED1/SALL1/SIX2/SOX8/WT1/PAX2/PDGFRA/CD34/PDGFRB/OSR1	11
BP	GO:2000772	regulation of cellular senescence	11|2417	35|14725	0.0207329	0.239794	ENSG00000149948/ENSG00000147889/ENSG00000122691/ENSG00000081181/ENSG00000117020/ENSG00000196660/ENSG00000189298/ENSG00000071246/ENSG00000253729/ENSG00000114904/ENSG00000096717	HMGA2/CDKN2A/TWIST1/ARG2/AKT3/SLC30A10/ZKSCAN3/VASH1/PRKDC/NEK4/SIRT1	11
BP	GO:0001667	ameboidal-type cell migration	70|2417	338|14725	0.0208786	0.240982	ENSG00000233276/ENSG00000184058/ENSG00000126016/ENSG00000128602/ENSG00000114251/ENSG00000037280/ENSG00000016082/ENSG00000138795/ENSG00000115232/ENSG00000169554/ENSG00000162733/ENSG00000122691/ENSG00000138685/ENSG00000183023/ENSG00000145147/ENSG00000005513/ENSG00000180318/ENSG00000132386/ENSG00000117707/ENSG00000164107/ENSG00000081189/ENSG00000075213/ENSG00000164093/ENSG00000157404/ENSG00000123612…	GPX1/TBX1/AMOT/SMO/WNT5A/FLT4/ISL1/LEF1/ITGA4/ZEB2/DDR2/TWIST1/FGF2/SLC8A1/SLIT2/SOX8/ALX1/SERPINF1/PROX1/HAND2/MEF2C/SEMA3A/PITX2/KIT/ACVR1C/PTPRM/CD40/PRR5L/SYDE1/CENPV/NRP2/EDNRB/ETS1/JCAD/AKT3/PAK1/NR2E1/ANGPT1/PRKD1/MIR221/ADGRA2/PAK3/HDAC9/HAS2/TNFSF12/BMPER/FER/CCBE1/HMOX1/SPARC/FOXC2/PKN2/PTGS2/BAG4/SVBP/C1QBP/VASH1/PRCP/MIR10B/TBXT/PRKCA/AMOTL1/RGCC/ENPP2/MIR196A1/DOCK1/SIRT1/JUN/CSNK2B/…	70
BP	GO:0055024	regulation of cardiac muscle tissue development	19|2417	72|14725	0.0209836	0.241698	ENSG00000152661/ENSG00000183072/ENSG00000069702/ENSG00000138685/ENSG00000169946/ENSG00000110693/ENSG00000081189/ENSG00000164532/ENSG00000149269/ENSG00000078900/ENSG00000143995/ENSG00000182533/ENSG00000183691/ENSG00000102678/ENSG00000111087/ENSG00000198563/ENSG00000151748/ENSG00000154342/ENSG00000151320	GJA1/NKX2-5/TGFBR3/FGF2/ZFPM2/SOX6/MEF2C/TBX20/PAK1/TP73/MEIS1/CAV3/NOG/FGF9/GLI1/DDX39B/SAV1/WNT3A/AKAP6	19
BP	GO:0021795	cerebral cortex cell migration	13|2417	44|14725	0.0211223	0.242303	ENSG00000184486/ENSG00000091136/ENSG00000176165/ENSG00000145147/ENSG00000198914/ENSG00000075213/ENSG00000112333/ENSG00000136352/ENSG00000172728/ENSG00000150764/ENSG00000146648/ENSG00000158748/ENSG00000096093	POU3F2/LAMB1/FOXG1/SLIT2/POU3F3/SEMA3A/NR2E1/NKX2-1/FUT10/DIXDC1/EGFR/HTR6/EFHC1	13
BP	GO:0048701	embryonic cranial skeleton morphogenesis	13|2417	44|14725	0.0211223	0.242303	ENSG00000184058/ENSG00000105991/ENSG00000122691/ENSG00000170577/ENSG00000081189/ENSG00000115844/ENSG00000116132/ENSG00000105996/ENSG00000126778/ENSG00000176692/ENSG00000134853/ENSG00000157796/ENSG00000121039	TBX1/HOXA1/TWIST1/SIX2/MEF2C/DLX2/PRRX1/HOXA2/SIX1/FOXC2/PDGFRA/WDR19/RDH10	13
BP	GO:0002028	regulation of sodium ion transport	20|2417	77|14725	0.0215215	0.246379	ENSG00000089327/ENSG00000196632/ENSG00000183072/ENSG00000183873/ENSG00000183023/ENSG00000018236/ENSG00000198947/ENSG00000126562/ENSG00000129244/ENSG00000135919/ENSG00000177098/ENSG00000152818/ENSG00000166257/ENSG00000137726/ENSG00000108961/ENSG00000182533/ENSG00000149575/ENSG00000171208/ENSG00000058668/ENSG00000143867	FXYD5/WNK3/NKX2-5/SCN5A/SLC8A1/CNTN1/DMD/WNK4/ATP1B2/SERPINE2/SCN4B/UTRN/SCN3B/FXYD6/RANGRF/CAV3/SCN2B/NETO2/ATP2B4/OSR1	20
BP	GO:0030239	myofibril assembly	16|2417	58|14725	0.0217451	0.248433	ENSG00000183072/ENSG00000077522/ENSG00000117707/ENSG00000109063/ENSG00000081189/ENSG00000133026/ENSG00000155657/ENSG00000036448/ENSG00000239474/ENSG00000182533/ENSG00000143632/ENSG00000163431/ENSG00000134853/ENSG00000165410/ENSG00000134775/ENSG00000113721	NKX2-5/ACTN2/PROX1/MYH3/MEF2C/MYH10/TTN/MYOM2/KLHL41/CAV3/ACTA1/LMOD1/PDGFRA/CFL2/FHOD3/PDGFRB	16
BP	GO:0007269	neurotransmitter secretion	30|2417	127|14725	0.0222489	0.25316	ENSG00000100505/ENSG00000145335/ENSG00000148408/ENSG00000169760/ENSG00000143858/ENSG00000116396/ENSG00000101298/ENSG00000081189/ENSG00000160469/ENSG00000110076/ENSG00000157152/ENSG00000134207/ENSG00000186472/ENSG00000176406/ENSG00000111450/ENSG00000021645/ENSG00000188906/ENSG00000185666/ENSG00000105737/ENSG00000204176/ENSG00000103528/ENSG00000102081/ENSG00000170743/ENSG00000136750/ENSG00000139220…	TRIM9/SNCA/CACNA1B/NLGN1/SYT2/KCNC4/SNPH/MEF2C/BRSK1/NRXN2/SYN2/SYT6/PCLO/RIMS2/STX2/NRXN3/LRRK2/SYN3/GRIK5/SYT15/SYT17/FMR1/SYT9/GAD2/PPFIA2/RIMS1/CHRNA3/SYT11/PRKN/SYNJ1	30
BP	GO:0099643	signal release from synapse	30|2417	127|14725	0.0222489	0.25316	ENSG00000100505/ENSG00000145335/ENSG00000148408/ENSG00000169760/ENSG00000143858/ENSG00000116396/ENSG00000101298/ENSG00000081189/ENSG00000160469/ENSG00000110076/ENSG00000157152/ENSG00000134207/ENSG00000186472/ENSG00000176406/ENSG00000111450/ENSG00000021645/ENSG00000188906/ENSG00000185666/ENSG00000105737/ENSG00000204176/ENSG00000103528/ENSG00000102081/ENSG00000170743/ENSG00000136750/ENSG00000139220…	TRIM9/SNCA/CACNA1B/NLGN1/SYT2/KCNC4/SNPH/MEF2C/BRSK1/NRXN2/SYN2/SYT6/PCLO/RIMS2/STX2/NRXN3/LRRK2/SYN3/GRIK5/SYT15/SYT17/FMR1/SYT9/GAD2/PPFIA2/RIMS1/CHRNA3/SYT11/PRKN/SYNJ1	30
BP	GO:0032526	response to retinoic acid	24|2417	97|14725	0.0226146	0.254836	ENSG00000152661/ENSG00000184058/ENSG00000128918/ENSG00000114251/ENSG00000185920/ENSG00000132386/ENSG00000108576/ENSG00000075891/ENSG00000105996/ENSG00000153162/ENSG00000062524/ENSG00000003137/ENSG00000240583/ENSG00000198963/ENSG00000196591/ENSG00000041982/ENSG00000169884/ENSG00000113721/ENSG00000111432/ENSG00000164458/ENSG00000143867/ENSG00000254087/ENSG00000154342/ENSG00000159082	GJA1/TBX1/ALDH1A2/WNT5A/PTCH1/SERPINF1/SLC6A4/PAX2/HOXA2/BMP6/LTK/CYP26B1/AQP1/RORB/HDAC2/TNC/WNT10B/PDGFRB/FZD10/TBXT/OSR1/LYN/WNT3A/SYNJ1	24
BP	GO:1903510	mucopolysaccharide metabolic process	26|2417	107|14725	0.0226921	0.254836	ENSG00000038427/ENSG00000175040/ENSG00000138685/ENSG00000111817/ENSG00000198108/ENSG00000173376/ENSG00000183196/ENSG00000122863/ENSG00000118276/ENSG00000064225/ENSG00000154080/ENSG00000164318/ENSG00000112309/ENSG00000154188/ENSG00000157350/ENSG00000170961/ENSG00000123243/ENSG00000107742/ENSG00000116704/ENSG00000136011/ENSG00000173546/ENSG00000072571/ENSG00000174684/ENSG00000169826/ENSG00000162267…	VCAN/CHST2/FGF2/DSE/CHSY3/NDNF/CHST6/CHST3/B4GALT6/ST3GAL6/CHST9/EGFLAM/B3GAT2/ANGPT1/ST3GAL2/HAS2/ITIH5/SPOCK2/SLC35D1/STAB2/CSPG4/HMMR/B4GAT1/CSGALNACT2/ITIH3/CHST4	26
BP	GO:0046622	positive regulation of organ growth	14|2417	49|14725	0.0228467	0.254836	ENSG00000128602/ENSG00000136630/ENSG00000069702/ENSG00000138685/ENSG00000169946/ENSG00000184937/ENSG00000117707/ENSG00000081189/ENSG00000164532/ENSG00000102678/ENSG00000111087/ENSG00000198563/ENSG00000007402/ENSG00000151320	SMO/HLX/TGFBR3/FGF2/ZFPM2/WT1/PROX1/MEF2C/TBX20/FGF9/GLI1/DDX39B/CACNA2D2/AKAP6	14
BP	GO:0003337	mesenchymal to epithelial transition involved in metanephros morphogenesis	5|2417	11|14725	0.0229855	0.254836	ENSG00000128602/ENSG00000125931/ENSG00000103449/ENSG00000170577/ENSG00000075891	SMO/CITED1/SALL1/SIX2/PAX2	5
BP	GO:0008340	determination of adult lifespan	5|2417	11|14725	0.0229855	0.254836	ENSG00000115112/ENSG00000149311/ENSG00000188906/ENSG00000085999/ENSG00000095002	TFCP2L1/ATM/LRRK2/RAD54L/MSH2	5
BP	GO:0010763	positive regulation of fibroblast migration	5|2417	11|14725	0.0229855	0.254836	ENSG00000162733/ENSG00000183023/ENSG00000149269/ENSG00000077264/ENSG00000156735	DDR2/SLC8A1/PAK1/PAK3/BAG4	5
BP	GO:0021554	optic nerve development	5|2417	11|14725	0.0229855	0.254836	ENSG00000198121/ENSG00000075891/ENSG00000154928/ENSG00000125820/ENSG00000177301	LPAR1/PAX2/EPHB1/NKX2-2/KCNA2	5
BP	GO:0021604	cranial nerve structural organization	5|2417	11|14725	0.0229855	0.254836	ENSG00000198947/ENSG00000075213/ENSG00000075891/ENSG00000173917/ENSG00000177301	DMD/SEMA3A/PAX2/HOXB2/KCNA2	5
BP	GO:0042415	norepinephrine metabolic process	5|2417	11|14725	0.0229855	0.254836	ENSG00000085662/ENSG00000079931/ENSG00000164107/ENSG00000173404/ENSG00000185345	AKR1B1/MOXD1/HAND2/INSM1/PRKN	5
BP	GO:0048340	paraxial mesoderm morphogenesis	5|2417	11|14725	0.0229855	0.254836	ENSG00000114251/ENSG00000138795/ENSG00000054598/ENSG00000176692/ENSG00000154342	WNT5A/LEF1/FOXC1/FOXC2/WNT3A	5
BP	GO:0048703	embryonic viscerocranium morphogenesis	5|2417	11|14725	0.0229855	0.254836	ENSG00000184058/ENSG00000081189/ENSG00000105996/ENSG00000176692/ENSG00000121039	TBX1/MEF2C/HOXA2/FOXC2/RDH10	5
BP	GO:0086069	bundle of His cell to Purkinje myocyte communication	5|2417	11|14725	0.0229855	0.254836	ENSG00000183873/ENSG00000153956/ENSG00000108961/ENSG00000046604/ENSG00000134755	SCN5A/CACNA2D1/RANGRF/DSG2/DSC2	5
BP	GO:1901841	regulation of high voltage-gated calcium channel activity	5|2417	11|14725	0.0229855	0.254836	ENSG00000153956/ENSG00000165995/ENSG00000146729/ENSG00000184588/ENSG00000075142	CACNA2D1/CACNB2/NIPSNAP2/PDE4B/SRI	5
BP	GO:0030204	chondroitin sulfate metabolic process	12|2417	40|14725	0.0232691	0.256462	ENSG00000038427/ENSG00000111817/ENSG00000198108/ENSG00000173376/ENSG00000122863/ENSG00000154080/ENSG00000164318/ENSG00000112309/ENSG00000107742/ENSG00000116704/ENSG00000173546/ENSG00000169826	VCAN/DSE/CHSY3/NDNF/CHST3/CHST9/EGFLAM/B3GAT2/SPOCK2/SLC35D1/CSPG4/CSGALNACT2	12
BP	GO:0035987	endodermal cell differentiation	12|2417	40|14725	0.0232691	0.256462	ENSG00000149948/ENSG00000134871/ENSG00000091136/ENSG00000115232/ENSG00000204262/ENSG00000087245/ENSG00000142156/ENSG00000198730/ENSG00000204531/ENSG00000161638/ENSG00000053747/ENSG00000144810	HMGA2/COL4A2/LAMB1/ITGA4/COL5A2/MMP2/COL6A1/CTR9/POU5F1/ITGA5/LAMA3/COL8A1	12
BP	GO:0050982	detection of mechanical stimulus	12|2417	40|14725	0.0232691	0.256462	ENSG00000010810/ENSG00000157404/ENSG00000154864/ENSG00000135919/ENSG00000155657/ENSG00000104321/ENSG00000182533/ENSG00000170456/ENSG00000198400/ENSG00000158683/ENSG00000186862/ENSG00000184014	FYN/KIT/PIEZO2/SERPINE2/TTN/TRPA1/CAV3/DENND5B/NTRK1/PKD1L1/PDZD7/DENND5A	12
BP	GO:0001707	mesoderm formation	18|2417	68|14725	0.0235078	0.258586	ENSG00000149948/ENSG00000116729/ENSG00000005073/ENSG00000114251/ENSG00000138795/ENSG00000170577/ENSG00000103241/ENSG00000054598/ENSG00000113196/ENSG00000104313/ENSG00000077943/ENSG00000075891/ENSG00000162367/ENSG00000164532/ENSG00000176692/ENSG00000183691/ENSG00000164458/ENSG00000154342	HMGA2/WLS/HOXA11/WNT5A/LEF1/SIX2/FOXF1/FOXC1/HAND1/EYA1/ITGA8/PAX2/TAL1/TBX20/FOXC2/NOG/TBXT/WNT3A	18
BP	GO:0032412	regulation of ion transmembrane transporter activity	43|2417	195|14725	0.0235965	0.259055	ENSG00000089327/ENSG00000145362/ENSG00000196730/ENSG00000196632/ENSG00000022267/ENSG00000182389/ENSG00000153956/ENSG00000169760/ENSG00000213366/ENSG00000077522/ENSG00000198947/ENSG00000085563/ENSG00000081189/ENSG00000129159/ENSG00000118507/ENSG00000129244/ENSG00000177098/ENSG00000152818/ENSG00000166257/ENSG00000137726/ENSG00000142408/ENSG00000196338/ENSG00000069482/ENSG00000108961/ENSG00000165995…	FXYD5/ANK2/DAPK1/WNK3/FHL1/CACNB4/CACNA2D1/NLGN1/GSTM2/ACTN2/DMD/ABCB1/MEF2C/KCNC1/AKAP7/ATP1B2/SCN4B/UTRN/SCN3B/FXYD6/CACNG8/NLGN3/GAL/RANGRF/CACNB2/CAV3/SCN2B/GOPC/FKBP1B/CHRFAM7A/NIPSNAP2/NETO2/PDE4B/FMR1/KCNAB1/STAC/SHANK1/SRI/RASGRF1/OSR1/ALG10B/CLIC2/AKAP6	43
BP	GO:0043552	positive regulation of phosphatidylinositol 3-kinase activity	9|2417	27|14725	0.0239533	0.261949	ENSG00000102755/ENSG00000138685/ENSG00000070886/ENSG00000157404/ENSG00000184304/ENSG00000097033/ENSG00000134853/ENSG00000113721/ENSG00000254087	FLT1/FGF2/EPHA8/KIT/PRKD1/SH3GLB1/PDGFRA/PDGFRB/LYN	9
BP	GO:0090075	relaxation of muscle	9|2417	27|14725	0.0239533	0.261949	ENSG00000169860/ENSG00000183023/ENSG00000213366/ENSG00000116741/ENSG00000185532/ENSG00000164116/ENSG00000170425/ENSG00000184588/ENSG00000075142	P2RY1/SLC8A1/GSTM2/RGS2/PRKG1/GUCY1A1/ADORA2B/PDE4B/SRI	9
BP	GO:0002068	glandular epithelial cell development	8|2417	23|14725	0.0252242	0.268429	ENSG00000128602/ENSG00000114251/ENSG00000077092/ENSG00000007372/ENSG00000163623/ENSG00000125820/ENSG00000173404/ENSG00000153162	SMO/WNT5A/RARB/PAX6/NKX6-1/NKX2-2/INSM1/BMP6	8
BP	GO:0030318	melanocyte differentiation	8|2417	23|14725	0.0252242	0.268429	ENSG00000125931/ENSG00000169554/ENSG00000173157/ENSG00000081189/ENSG00000157404/ENSG00000136160/ENSG00000104044/ENSG00000187098	CITED1/ZEB2/ADAMTS20/MEF2C/KIT/EDNRB/OCA2/MITF	8
BP	GO:0072273	metanephric nephron morphogenesis	8|2417	23|14725	0.0252242	0.268429	ENSG00000128602/ENSG00000125931/ENSG00000103449/ENSG00000170577/ENSG00000005513/ENSG00000184937/ENSG00000075891/ENSG00000113721	SMO/CITED1/SALL1/SIX2/SOX8/WT1/PAX2/PDGFRB	8
BP	GO:0098868	bone growth	8|2417	23|14725	0.0252242	0.268429	ENSG00000072840/ENSG00000077092/ENSG00000116678/ENSG00000162733/ENSG00000173068/ENSG00000188729/ENSG00000105664/ENSG00000196739	EVC/RARB/LEPR/DDR2/BNC2/OSTN/COMP/COL27A1	8
BP	GO:1901984	negative regulation of protein acetylation	8|2417	23|14725	0.0252242	0.268429	ENSG00000145335/ENSG00000122691/ENSG00000163884/ENSG00000268606/ENSG00000196591/ENSG00000183305/ENSG00000012048/ENSG00000096717	SNCA/TWIST1/KLF15/MAGEA2/HDAC2/MAGEA2B/BRCA1/SIRT1	8
BP	GO:0035296	regulation of tube diameter	27|2417	113|14725	0.0252426	0.268429	ENSG00000152661/ENSG00000233276/ENSG00000169860/ENSG00000213949/ENSG00000181104/ENSG00000183023/ENSG00000007171/ENSG00000108576/ENSG00000116741/ENSG00000173482/ENSG00000136160/ENSG00000185532/ENSG00000133019/ENSG00000118965/ENSG00000164116/ENSG00000128512/ENSG00000170425/ENSG00000171388/ENSG00000144596/ENSG00000144891/ENSG00000100292/ENSG00000073756/ENSG00000166148/ENSG00000059377/ENSG00000181408…	GJA1/GPX1/P2RY1/ITGA1/F2R/SLC8A1/NOS2/SLC6A4/RGS2/PTPRM/EDNRB/PRKG1/CHRM3/WDR35/GUCY1A1/DOCK4/ADORA2B/APLN/GRIP2/AGTR1/HMOX1/PTGS2/AVPR1A/TBXAS1/UTS2R/EGFR/EDNRA	27
BP	GO:0097746	regulation of blood vessel diameter	27|2417	113|14725	0.0252426	0.268429	ENSG00000152661/ENSG00000233276/ENSG00000169860/ENSG00000213949/ENSG00000181104/ENSG00000183023/ENSG00000007171/ENSG00000108576/ENSG00000116741/ENSG00000173482/ENSG00000136160/ENSG00000185532/ENSG00000133019/ENSG00000118965/ENSG00000164116/ENSG00000128512/ENSG00000170425/ENSG00000171388/ENSG00000144596/ENSG00000144891/ENSG00000100292/ENSG00000073756/ENSG00000166148/ENSG00000059377/ENSG00000181408…	GJA1/GPX1/P2RY1/ITGA1/F2R/SLC8A1/NOS2/SLC6A4/RGS2/PTPRM/EDNRB/PRKG1/CHRM3/WDR35/GUCY1A1/DOCK4/ADORA2B/APLN/GRIP2/AGTR1/HMOX1/PTGS2/AVPR1A/TBXAS1/UTS2R/EGFR/EDNRA	27
BP	GO:0070252	actin-mediated cell contraction	23|2417	93|14725	0.025361	0.268429	ENSG00000152661/ENSG00000145362/ENSG00000162493/ENSG00000182963/ENSG00000183873/ENSG00000153956/ENSG00000077522/ENSG00000198947/ENSG00000109063/ENSG00000155657/ENSG00000177098/ENSG00000166257/ENSG00000165995/ENSG00000182533/ENSG00000143632/ENSG00000149575/ENSG00000046604/ENSG00000134755/ENSG00000184588/ENSG00000113569/ENSG00000075142/ENSG00000151067/ENSG00000053918	GJA1/ANK2/PDPN/GJC1/SCN5A/CACNA2D1/ACTN2/DMD/MYH3/TTN/SCN4B/SCN3B/CACNB2/CAV3/ACTA1/SCN2B/DSG2/DSC2/PDE4B/NUP155/SRI/CACNA1C/KCNQ1	23
BP	GO:0045843	negative regulation of striated muscle tissue development	13|2417	45|14725	0.0253672	0.268429	ENSG00000152661/ENSG00000138795/ENSG00000122691/ENSG00000110693/ENSG00000154928/ENSG00000149269/ENSG00000095587/ENSG00000078900/ENSG00000143995/ENSG00000182533/ENSG00000138379/ENSG00000183691/ENSG00000151748	GJA1/LEF1/TWIST1/SOX6/EPHB1/PAK1/TLL2/TP73/MEIS1/CAV3/MSTN/NOG/SAV1	13
BP	GO:0046068	cGMP metabolic process	13|2417	45|14725	0.0253672	0.268429	ENSG00000114251/ENSG00000112541/ENSG00000007171/ENSG00000061918/ENSG00000188729/ENSG00000152402/ENSG00000164116/ENSG00000170425/ENSG00000069667/ENSG00000147246/ENSG00000240583/ENSG00000160191/ENSG00000123360	WNT5A/PDE10A/NOS2/GUCY1B1/OSTN/GUCY1A2/GUCY1A1/ADORA2B/RORA/HTR2C/AQP1/PDE9A/PDE1B	13
BP	GO:0019226	transmission of nerve impulse	16|2417	59|14725	0.0254244	0.268429	ENSG00000166086/ENSG00000183873/ENSG00000136531/ENSG00000170989/ENSG00000142408/ENSG00000163531/ENSG00000007314/ENSG00000177301/ENSG00000169432/ENSG00000119782/ENSG00000166148/ENSG00000153253/ENSG00000102081/ENSG00000064218/ENSG00000108797/ENSG00000168356	JAM3/SCN5A/SCN2A/S1PR1/CACNG8/NFASC/SCN4A/KCNA2/SCN9A/FKBP1B/AVPR1A/SCN3A/FMR1/DMRT3/CNTNAP1/SCN11A	16
BP	GO:0042698	ovulation cycle	16|2417	59|14725	0.0254244	0.268429	ENSG00000154734/ENSG00000185008/ENSG00000145147/ENSG00000108984/ENSG00000132386/ENSG00000134954/ENSG00000170961/ENSG00000184347/ENSG00000134853/ENSG00000175344/ENSG00000138379/ENSG00000146648/ENSG00000177551/ENSG00000136931/ENSG00000145730/ENSG00000096717	ADAMTS1/ROBO2/SLIT2/MAP2K6/SERPINF1/ETS1/HAS2/SLIT3/PDGFRA/CHRNA7/MSTN/EGFR/NHLH2/NR5A1/PAM/SIRT1	16
BP	GO:0044786	cell cycle DNA replication	16|2417	59|14725	0.0254244	0.268429	ENSG00000276644/ENSG00000097046/ENSG00000101972/ENSG00000161692/ENSG00000147601/ENSG00000111445/ENSG00000020922/ENSG00000075131/ENSG00000117748/ENSG00000159147/ENSG00000163918/ENSG00000101868/ENSG00000108055/ENSG00000072501/ENSG00000138346/ENSG00000132383	DACH1/CDC7/STAG2/DBF4B/TERF1/RFC5/MRE11/TIPIN/RPA2/DONSON/RFC4/POLA1/SMC3/SMC1A/DNA2/RPA1	16
BP	GO:0007350	blastoderm segmentation	6|2417	15|14725	0.025485	0.268429	ENSG00000114251/ENSG00000184937/ENSG00000075213/ENSG00000175879/ENSG00000164458/ENSG00000135111	WNT5A/WT1/SEMA3A/HOXD8/TBXT/TBX3	6
BP	GO:0009415	response to water	6|2417	15|14725	0.025485	0.268429	ENSG00000085662/ENSG00000198947/ENSG00000166148/ENSG00000058668/ENSG00000198400/ENSG00000213445	AKR1B1/DMD/AVPR1A/ATP2B4/NTRK1/SIPA1	6
BP	GO:0021514	ventral spinal cord interneuron differentiation	6|2417	15|14725	0.025485	0.268429	ENSG00000074047/ENSG00000007372/ENSG00000163623/ENSG00000125820/ENSG00000139445/ENSG00000064218	GLI2/PAX6/NKX6-1/NKX2-2/FOXN4/DMRT3	6
BP	GO:0042438	melanin biosynthetic process	6|2417	15|14725	0.025485	0.268429	ENSG00000125931/ENSG00000114251/ENSG00000169554/ENSG00000104044/ENSG00000144935/ENSG00000164175	CITED1/WNT5A/ZEB2/OCA2/TRPC1/SLC45A2	6
BP	GO:0071731	response to nitric oxide	6|2417	15|14725	0.025485	0.268429	ENSG00000061918/ENSG00000116984/ENSG00000240583/ENSG00000150907/ENSG00000135766/ENSG00000138668	GUCY1B1/MTR/AQP1/FOXO1/EGLN1/HNRNPD	6
BP	GO:0006296	nucleotide-excision repair, DNA incision, 5'-to lesion	11|2417	36|14725	0.0255487	0.268429	ENSG00000145736/ENSG00000143799/ENSG00000158290/ENSG00000111445/ENSG00000272047/ENSG00000117748/ENSG00000122008/ENSG00000163918/ENSG00000111358/ENSG00000175595/ENSG00000132383	GTF2H2/PARP1/CUL4B/RFC5/GTF2H5/RPA2/POLK/RFC4/GTF2H3/ERCC4/RPA1	11
BP	GO:0046189	phenol-containing compound biosynthetic process	11|2417	36|14725	0.0255487	0.268429	ENSG00000079931/ENSG00000125931/ENSG00000114251/ENSG00000169554/ENSG00000145335/ENSG00000164107/ENSG00000173404/ENSG00000104044/ENSG00000144935/ENSG00000129167/ENSG00000164175	MOXD1/CITED1/WNT5A/ZEB2/SNCA/HAND2/INSM1/OCA2/TRPC1/TPH1/SLC45A2	11
BP	GO:0060323	head morphogenesis	11|2417	36|14725	0.0255487	0.268429	ENSG00000184058/ENSG00000138795/ENSG00000105880/ENSG00000109063/ENSG00000121005/ENSG00000087245/ENSG00000163132/ENSG00000162769/ENSG00000134853/ENSG00000183691/ENSG00000198363	TBX1/LEF1/DLX5/MYH3/CRISPLD1/MMP2/MSX1/FLVCR1/PDGFRA/NOG/ASPH	11
BP	GO:0006836	neurotransmitter transport	46|2417	212|14725	0.0258065	0.269718	ENSG00000159164/ENSG00000137968/ENSG00000079215/ENSG00000072041/ENSG00000100505/ENSG00000145335/ENSG00000148408/ENSG00000169760/ENSG00000143858/ENSG00000197106/ENSG00000132164/ENSG00000108576/ENSG00000116396/ENSG00000046653/ENSG00000101298/ENSG00000081189/ENSG00000160469/ENSG00000110076/ENSG00000157152/ENSG00000106688/ENSG00000134207/ENSG00000010379/ENSG00000186472/ENSG00000171388/ENSG00000176406…	SV2A/SLC44A5/SLC1A3/SLC6A15/TRIM9/SNCA/CACNA1B/NLGN1/SYT2/SLC6A17/SLC6A11/SLC6A4/KCNC4/GPM6B/SNPH/MEF2C/BRSK1/NRXN2/SYN2/SLC1A1/SYT6/SLC6A13/PCLO/APLN/RIMS2/STX2/NRXN3/LRRK2/HTR2C/AQP1/SYN3/GRIK5/SLC6A1/SYT15/SYT17/FMR1/SYT9/GAD2/PPFIA2/RIMS1/CHRNA3/SYT11/LYN/SLC6A16/PRKN/SYNJ1	46
BP	GO:0032332	positive regulation of chondrocyte differentiation	7|2417	19|14725	0.0259113	0.269718	ENSG00000005073/ENSG00000110693/ENSG00000134532/ENSG00000162878/ENSG00000153162/ENSG00000109906/ENSG00000156466	HOXA11/SOX6/SOX5/PKDCC/BMP6/ZBTB16/GDF6	7
BP	GO:0060055	angiogenesis involved in wound healing	7|2417	19|14725	0.0259113	0.269718	ENSG00000233276/ENSG00000076706/ENSG00000173376/ENSG00000134954/ENSG00000176692/ENSG00000174059/ENSG00000137509	GPX1/MCAM/NDNF/ETS1/FOXC2/CD34/PRCP	7
BP	GO:0060307	regulation of ventricular cardiac muscle cell membrane repolarization	7|2417	19|14725	0.0259113	0.269718	ENSG00000152661/ENSG00000145362/ENSG00000183873/ENSG00000153956/ENSG00000177098/ENSG00000182533/ENSG00000053918	GJA1/ANK2/SCN5A/CACNA2D1/SCN4B/CAV3/KCNQ1	7
BP	GO:1903859	regulation of dendrite extension	7|2417	19|14725	0.0259113	0.269718	ENSG00000119866/ENSG00000143858/ENSG00000188729/ENSG00000176406/ENSG00000103528/ENSG00000079841/ENSG00000185345	BCL11A/SYT2/OSTN/RIMS2/SYT17/RIMS1/PRKN	7
BP	GO:0022604	regulation of cell morphogenesis	82|2417	408|14725	0.0266518	0.276913	ENSG00000082397/ENSG00000162493/ENSG00000147065/ENSG00000277586/ENSG00000184486/ENSG00000112276/ENSG00000114251/ENSG00000010810/ENSG00000185008/ENSG00000169554/ENSG00000154310/ENSG00000077942/ENSG00000131711/ENSG00000242498/ENSG00000171517/ENSG00000119866/ENSG00000163623/ENSG00000169760/ENSG00000135298/ENSG00000143858/ENSG00000145147/ENSG00000198121/ENSG00000153707/ENSG00000188677/ENSG00000135333…	EPB41L3/PDPN/MSN/NEFL/POU3F2/BVES/WNT5A/FYN/ROBO2/ZEB2/TNIK/FBLN1/MAP1B/ARPIN/LPAR3/BCL11A/NKX6-1/NLGN1/ADGRB3/SYT2/SLIT2/LPAR1/PTPRD/PARVB/EPHA7/TUBB2B/SEMA3A/KIT/OSTN/SPART/ARAP3/CUX2/SHOX2/CDC7/BHLHB9/MYH10/DNM3/EPB41/CDC42EP3/BARHL2/SEMA3G/LRP4/PAK1/NR2E1/BRWD3/NLGN3/PLXNA2/TTBK2/PAK3/RGMA/STRIP2/FMNL2/HAS2/RIMS2/COCH/CAPRIN2/LRRK2/ZMYM4/RAP2A/SPARC/WASF3/PDZD8/PALM2-AKAP2/PTPRO/KIF3A/FGD1/NT…	82
BP	GO:0002562	somatic diversification of immune receptors via germline recombination within a single locus	14|2417	50|14725	0.02708	0.279811	ENSG00000138795/ENSG00000081059/ENSG00000101017/ENSG00000149311/ENSG00000174371/ENSG00000169621/ENSG00000166349/ENSG00000117586/ENSG00000112130/ENSG00000133789/ENSG00000176208/ENSG00000070501/ENSG00000253729/ENSG00000095002	LEF1/TCF7/CD40/ATM/EXO1/APLF/RAG1/TNFSF4/RNF8/SWAP70/ATAD5/POLB/PRKDC/MSH2	14
BP	GO:0016444	somatic cell DNA recombination	14|2417	50|14725	0.02708	0.279811	ENSG00000138795/ENSG00000081059/ENSG00000101017/ENSG00000149311/ENSG00000174371/ENSG00000169621/ENSG00000166349/ENSG00000117586/ENSG00000112130/ENSG00000133789/ENSG00000176208/ENSG00000070501/ENSG00000253729/ENSG00000095002	LEF1/TCF7/CD40/ATM/EXO1/APLF/RAG1/TNFSF4/RNF8/SWAP70/ATAD5/POLB/PRKDC/MSH2	14
BP	GO:0018208	peptidyl-proline modification	14|2417	50|14725	0.02708	0.279811	ENSG00000110811/ENSG00000106080/ENSG00000079150/ENSG00000119782/ENSG00000117385/ENSG00000090530/ENSG00000135766/ENSG00000171960/ENSG00000131013/ENSG00000153015/ENSG00000102309/ENSG00000113593/ENSG00000114857/ENSG00000198225	P3H3/FKBP14/FKBP7/FKBP1B/P3H1/P3H2/EGLN1/PPIH/PPIL4/CWC27/PIN4/PPWD1/NKTR/FKBP1C	14
BP	GO:0042133	neurotransmitter metabolic process	29|2417	124|14725	0.0275307	0.283945	ENSG00000079215/ENSG00000079931/ENSG00000114200/ENSG00000081181/ENSG00000007171/ENSG00000108576/ENSG00000178445/ENSG00000118965/ENSG00000163661/ENSG00000174130/ENSG00000196689/ENSG00000077616/ENSG00000069667/ENSG00000124212/ENSG00000228716/ENSG00000153904/ENSG00000206561/ENSG00000159131/ENSG00000073756/ENSG00000129167/ENSG00000174059/ENSG00000135049/ENSG00000058668/ENSG00000136750/ENSG00000157426…	SLC1A3/MOXD1/BCHE/ARG2/NOS2/SLC6A4/GLDC/WDR35/PTX3/TLR6/TRPV1/NAALAD2/RORA/PTGIS/DHFR/DDAH1/COLQ/GART/PTGS2/TPH1/CD34/AGTPBP1/ATP2B4/GAD2/AASDH/GLA/ALDH9A1/PDE1B/DDAH2	29
BP	GO:0010573	vascular endothelial growth factor production	10|2417	32|14725	0.0279193	0.2869	ENSG00000156140/ENSG00000037280/ENSG00000016082/ENSG00000170425/ENSG00000069667/ENSG00000183287/ENSG00000073756/ENSG00000007952/ENSG00000012048/ENSG00000137573	ADAMTS3/FLT4/ISL1/ADORA2B/RORA/CCBE1/PTGS2/NOX1/BRCA1/SULF1	10
BP	GO:0048854	brain morphogenesis	10|2417	32|14725	0.0279193	0.2869	ENSG00000170558/ENSG00000128602/ENSG00000143869/ENSG00000114251/ENSG00000108576/ENSG00000075891/ENSG00000117020/ENSG00000135638/ENSG00000130396/ENSG00000104290	CDH2/SMO/GDF7/WNT5A/SLC6A4/PAX2/AKT3/EMX1/AFDN/FZD3	10
BP	GO:0002065	columnar/cuboidal epithelial cell differentiation	25|2417	104|14725	0.0284165	0.289746	ENSG00000170558/ENSG00000128602/ENSG00000106004/ENSG00000114251/ENSG00000055732/ENSG00000165556/ENSG00000077092/ENSG00000138795/ENSG00000007372/ENSG00000163623/ENSG00000117707/ENSG00000006611/ENSG00000139515/ENSG00000125820/ENSG00000173404/ENSG00000109705/ENSG00000153162/ENSG00000135638/ENSG00000106392/ENSG00000172238/ENSG00000107949/ENSG00000130396/ENSG00000185002/ENSG00000151748/ENSG00000186862	CDH2/SMO/HOXA5/WNT5A/MCOLN3/CDX2/RARB/LEF1/PAX6/NKX6-1/PROX1/USH1C/PDX1/NKX2-2/INSM1/NKX3-2/BMP6/EMX1/C1GALT1/ATOH1/BCCIP/AFDN/RFX6/SAV1/PDZD7	25
BP	GO:0045598	regulation of fat cell differentiation	25|2417	104|14725	0.0284165	0.289746	ENSG00000151468/ENSG00000019549/ENSG00000114251/ENSG00000169946/ENSG00000104332/ENSG00000174705/ENSG00000069667/ENSG00000147246/ENSG00000181004/ENSG00000150907/ENSG00000073756/ENSG00000109906/ENSG00000129167/ENSG00000071575/ENSG00000140718/ENSG00000186897/ENSG00000184828/ENSG00000171462/ENSG00000169884/ENSG00000151748/ENSG00000172201/ENSG00000079102/ENSG00000154342/ENSG00000253276/ENSG00000096717	CCDC3/SNAI2/WNT5A/ZFPM2/SFRP1/SH3PXD2B/RORA/HTR2C/BBS12/FOXO1/PTGS2/ZBTB16/TPH1/TRIB2/FTO/C1QL4/ZBTB7C/DLK2/WNT10B/SAV1/ID4/RUNX1T1/WNT3A/CCDC71L/SIRT1	25
BP	GO:1990823	response to leukemia inhibitory factor	22|2417	89|14725	0.0284588	0.289746	ENSG00000114948/ENSG00000148798/ENSG00000163710/ENSG00000007372/ENSG00000116761/ENSG00000106829/ENSG00000172350/ENSG00000178860/ENSG00000178445/ENSG00000158186/ENSG00000118965/ENSG00000143033/ENSG00000138738/ENSG00000060762/ENSG00000134758/ENSG00000105849/ENSG00000136158/ENSG00000107742/ENSG00000023909/ENSG00000153187/ENSG00000119969/ENSG00000096717	ADAM23/INA/PCOLCE2/PAX6/CTH/TLE4/ABCG4/MSC/GLDC/MRAS/WDR35/MTF2/PRDM5/MPC1/RNF138/TWISTNB/SPRY2/SPOCK2/GCLM/HNRNPU/HELLS/SIRT1	22
BP	GO:1990830	cellular response to leukemia inhibitory factor	22|2417	89|14725	0.0284588	0.289746	ENSG00000114948/ENSG00000148798/ENSG00000163710/ENSG00000007372/ENSG00000116761/ENSG00000106829/ENSG00000172350/ENSG00000178860/ENSG00000178445/ENSG00000158186/ENSG00000118965/ENSG00000143033/ENSG00000138738/ENSG00000060762/ENSG00000134758/ENSG00000105849/ENSG00000136158/ENSG00000107742/ENSG00000023909/ENSG00000153187/ENSG00000119969/ENSG00000096717	ADAM23/INA/PCOLCE2/PAX6/CTH/TLE4/ABCG4/MSC/GLDC/MRAS/WDR35/MTF2/PRDM5/MPC1/RNF138/TWISTNB/SPRY2/SPOCK2/GCLM/HNRNPU/HELLS/SIRT1	22
BP	GO:0042303	molting cycle	24|2417	99|14725	0.0285055	0.289746	ENSG00000162738/ENSG00000128602/ENSG00000052850/ENSG00000114251/ENSG00000164066/ENSG00000178919/ENSG00000139292/ENSG00000156535/ENSG00000133710/ENSG00000134569/ENSG00000117425/ENSG00000125285/ENSG00000171243/ENSG00000069482/ENSG00000162601/ENSG00000127863/ENSG00000073756/ENSG00000196591/ENSG00000158813/ENSG00000146648/ENSG00000169884/ENSG00000116478/ENSG00000151748/ENSG00000104290	VANGL2/SMO/ALX4/WNT5A/INTU/FOXE1/LGR5/CD109/SPINK5/LRP4/PTCH2/SOX21/SOSTDC1/GAL/MYSM1/TNFRSF19/PTGS2/HDAC2/EDA/EGFR/WNT10B/HDAC1/SAV1/FZD3	24
BP	GO:0042633	hair cycle	24|2417	99|14725	0.0285055	0.289746	ENSG00000162738/ENSG00000128602/ENSG00000052850/ENSG00000114251/ENSG00000164066/ENSG00000178919/ENSG00000139292/ENSG00000156535/ENSG00000133710/ENSG00000134569/ENSG00000117425/ENSG00000125285/ENSG00000171243/ENSG00000069482/ENSG00000162601/ENSG00000127863/ENSG00000073756/ENSG00000196591/ENSG00000158813/ENSG00000146648/ENSG00000169884/ENSG00000116478/ENSG00000151748/ENSG00000104290	VANGL2/SMO/ALX4/WNT5A/INTU/FOXE1/LGR5/CD109/SPINK5/LRP4/PTCH2/SOX21/SOSTDC1/GAL/MYSM1/TNFRSF19/PTGS2/HDAC2/EDA/EGFR/WNT10B/HDAC1/SAV1/FZD3	24
BP	GO:0010959	regulation of metal ion transport	63|2417	305|14725	0.0286093	0.290276	ENSG00000152661/ENSG00000089327/ENSG00000145362/ENSG00000196632/ENSG00000022267/ENSG00000181104/ENSG00000183072/ENSG00000010810/ENSG00000183873/ENSG00000087258/ENSG00000145335/ENSG00000182389/ENSG00000171517/ENSG00000148408/ENSG00000153956/ENSG00000183023/ENSG00000018236/ENSG00000213366/ENSG00000077522/ENSG00000078549/ENSG00000198947/ENSG00000126562/ENSG00000116329/ENSG00000129159/ENSG00000118507…	GJA1/FXYD5/ANK2/WNK3/FHL1/F2R/NKX2-5/FYN/SCN5A/GNAO1/SNCA/CACNB4/LPAR3/CACNA1B/CACNA2D1/SLC8A1/CNTN1/GSTM2/ACTN2/ADCYAP1R1/DMD/WNK4/OPRD1/KCNC1/AKAP7/ATP1B2/TRPC3/SERPINE2/CD19/SCN4B/UBASH3B/UTRN/SCN3B/FXYD6/PRKD1/GAL/RANGRF/CACNB2/CAV3/SCN2B/TRPC1/SLC30A10/FKBP1B/XCL1/PTGS2/NIPSNAP2/NETO2/PDE4B/FMR1/KCNAB1/ATP2B4/STAC/PDGFRB/SRI/MYLK/OSR1/CACNA1C/ALG10B/LYN/CD4/CLIC2/AKAP6/KCNQ1	63
BP	GO:0021885	forebrain cell migration	16|2417	60|14725	0.0295504	0.299285	ENSG00000184486/ENSG00000091136/ENSG00000176165/ENSG00000145147/ENSG00000198914/ENSG00000171956/ENSG00000075213/ENSG00000170370/ENSG00000112333/ENSG00000136352/ENSG00000172728/ENSG00000188906/ENSG00000150764/ENSG00000146648/ENSG00000158748/ENSG00000096093	POU3F2/LAMB1/FOXG1/SLIT2/POU3F3/FOXB1/SEMA3A/EMX2/NR2E1/NKX2-1/FUT10/LRRK2/DIXDC1/EGFR/HTR6/EFHC1	16
BP	GO:0014743	regulation of muscle hypertrophy	13|2417	46|14725	0.0302078	0.302511	ENSG00000164107/ENSG00000116741/ENSG00000143799/ENSG00000138741/ENSG00000149269/ENSG00000182533/ENSG00000150907/ENSG00000138379/ENSG00000160191/ENSG00000058668/ENSG00000198563/ENSG00000154229/ENSG00000151320	HAND2/RGS2/PARP1/TRPC3/PAK1/CAV3/FOXO1/MSTN/PDE9A/ATP2B4/DDX39B/PRKCA/AKAP6	13
BP	GO:0048635	negative regulation of muscle organ development	13|2417	46|14725	0.0302078	0.302511	ENSG00000152661/ENSG00000138795/ENSG00000122691/ENSG00000110693/ENSG00000154928/ENSG00000149269/ENSG00000095587/ENSG00000078900/ENSG00000143995/ENSG00000182533/ENSG00000138379/ENSG00000183691/ENSG00000151748	GJA1/LEF1/TWIST1/SOX6/EPHB1/PAK1/TLL2/TP73/MEIS1/CAV3/MSTN/NOG/SAV1	13
BP	GO:0002053	positive regulation of mesenchymal cell proliferation	9|2417	28|14725	0.0302995	0.302511	ENSG00000184058/ENSG00000128602/ENSG00000128573/ENSG00000114251/ENSG00000103241/ENSG00000168779/ENSG00000116132/ENSG00000126778/ENSG00000102678	TBX1/SMO/FOXP2/WNT5A/FOXF1/SHOX2/PRRX1/SIX1/FGF9	9
BP	GO:0021696	cerebellar cortex morphogenesis	9|2417	28|14725	0.0302995	0.302511	ENSG00000128602/ENSG00000074047/ENSG00000117707/ENSG00000135919/ENSG00000069667/ENSG00000152208/ENSG00000102924/ENSG00000111087/ENSG00000135049	SMO/GLI2/PROX1/SERPINE2/RORA/GRID2/CBLN1/GLI1/AGTPBP1	9
BP	GO:0043516	regulation of DNA damage response, signal transduction by p53 class mediator	9|2417	28|14725	0.0302995	0.302511	ENSG00000019549/ENSG00000122691/ENSG00000141682/ENSG00000149311/ENSG00000163132/ENSG00000143479/ENSG00000101843/ENSG00000161970/ENSG00000096717	SNAI2/TWIST1/PMAIP1/ATM/MSX1/DYRK3/PSMD10/RPL26/SIRT1	9
BP	GO:0045879	negative regulation of smoothened signaling pathway	9|2417	28|14725	0.0302995	0.302511	ENSG00000147257/ENSG00000143147/ENSG00000185920/ENSG00000135919/ENSG00000117425/ENSG00000168301/ENSG00000204104/ENSG00000166813/ENSG00000142875	GPC3/GPR161/PTCH1/SERPINE2/PTCH2/KCTD6/TRAF3IP1/KIF7/PRKACB	9
BP	GO:0070296	sarcoplasmic reticulum calcium ion transport	9|2417	28|14725	0.0302995	0.302511	ENSG00000145362/ENSG00000183023/ENSG00000213366/ENSG00000198947/ENSG00000119782/ENSG00000075142/ENSG00000151067/ENSG00000155962/ENSG00000151320	ANK2/SLC8A1/GSTM2/DMD/FKBP1B/SRI/CACNA1C/CLIC2/AKAP6	9
BP	GO:1901381	positive regulation of potassium ion transmembrane transport	9|2417	28|14725	0.0302995	0.302511	ENSG00000145362/ENSG00000077522/ENSG00000129159/ENSG00000118507/ENSG00000129244/ENSG00000069482/ENSG00000175548/ENSG00000151320/ENSG00000053918	ANK2/ACTN2/KCNC1/AKAP7/ATP1B2/GAL/ALG10B/AKAP6/KCNQ1	9
BP	GO:0050804	modulation of chemical synaptic transmission	56|2417	268|14725	0.0304963	0.303397	ENSG00000079215/ENSG00000121297/ENSG00000127955/ENSG00000181104/ENSG00000168824/ENSG00000145335/ENSG00000114200/ENSG00000169760/ENSG00000144868/ENSG00000061918/ENSG00000108576/ENSG00000116396/ENSG00000081189/ENSG00000157404/ENSG00000111249/ENSG00000154146/ENSG00000135919/ENSG00000196569/ENSG00000102003/ENSG00000112333/ENSG00000108852/ENSG00000104267/ENSG00000115896/ENSG00000196338/ENSG00000169071…	SLC1A3/TSHZ3/GNAI1/F2R/NSG1/SNCA/BCHE/NLGN1/TMEM108/GUCY1B1/SLC6A4/KCNC4/MEF2C/KIT/CUX2/NRGN/SERPINE2/LAMA2/SYP/NR2E1/MPP2/CA2/PLCL1/NLGN3/ROR2/RIMS2/SLC8A3/LRRK2/PXK/GRID2/SYN3/CHRFAM7A/CBLN1/GRIK5/ABHD6/PTGS2/SLC6A1/CHRNA7/NTRK2/MTMR2/SYBU/FMR1/EGFR/NMU/NTRK1/RGS14/SHANK1/CELF4/RIMS1/CHRNA3/CACNA2D2/SYT11/RAPSN/RASGRF1/NEUROD2/PRKN	56
BP	GO:0099177	regulation of trans-synaptic signaling	56|2417	268|14725	0.0304963	0.303397	ENSG00000079215/ENSG00000121297/ENSG00000127955/ENSG00000181104/ENSG00000168824/ENSG00000145335/ENSG00000114200/ENSG00000169760/ENSG00000144868/ENSG00000061918/ENSG00000108576/ENSG00000116396/ENSG00000081189/ENSG00000157404/ENSG00000111249/ENSG00000154146/ENSG00000135919/ENSG00000196569/ENSG00000102003/ENSG00000112333/ENSG00000108852/ENSG00000104267/ENSG00000115896/ENSG00000196338/ENSG00000169071…	SLC1A3/TSHZ3/GNAI1/F2R/NSG1/SNCA/BCHE/NLGN1/TMEM108/GUCY1B1/SLC6A4/KCNC4/MEF2C/KIT/CUX2/NRGN/SERPINE2/LAMA2/SYP/NR2E1/MPP2/CA2/PLCL1/NLGN3/ROR2/RIMS2/SLC8A3/LRRK2/PXK/GRID2/SYN3/CHRFAM7A/CBLN1/GRIK5/ABHD6/PTGS2/SLC6A1/CHRNA7/NTRK2/MTMR2/SYBU/FMR1/EGFR/NMU/NTRK1/RGS14/SHANK1/CELF4/RIMS1/CHRNA3/CACNA2D2/SYT11/RAPSN/RASGRF1/NEUROD2/PRKN	56
BP	GO:0030278	regulation of ossification	38|2417	172|14725	0.030932	0.307188	ENSG00000152661/ENSG00000198732/ENSG00000138829/ENSG00000125931/ENSG00000019549/ENSG00000114251/ENSG00000162733/ENSG00000122691/ENSG00000170577/ENSG00000183023/ENSG00000233608/ENSG00000185920/ENSG00000164066/ENSG00000164107/ENSG00000046653/ENSG00000081189/ENSG00000188729/ENSG00000104332/ENSG00000170989/ENSG00000134569/ENSG00000183688/ENSG00000105996/ENSG00000162878/ENSG00000153162/ENSG00000184304…	GJA1/SMOC1/FBN2/CITED1/SNAI2/WNT5A/DDR2/TWIST1/SIX2/SLC8A1/TWIST2/PTCH1/INTU/HAND2/GPM6B/MEF2C/OSTN/SFRP1/S1PR1/LRP4/RFLNB/HOXA2/PKDCC/BMP6/PRKD1/RASSF2/GDF10/RORB/ZBTB16/TPH1/BCOR/TXLNG/ACVR2B/NOG/GLI1/WNT10B/OSR1/ID4	38
BP	GO:0060421	positive regulation of heart growth	11|2417	37|14725	0.0311246	0.308556	ENSG00000069702/ENSG00000138685/ENSG00000169946/ENSG00000184937/ENSG00000117707/ENSG00000081189/ENSG00000164532/ENSG00000102678/ENSG00000111087/ENSG00000198563/ENSG00000151320	TGFBR3/FGF2/ZFPM2/WT1/PROX1/MEF2C/TBX20/FGF9/GLI1/DDX39B/AKAP6	11
BP	GO:0006261	DNA-dependent DNA replication	33|2417	146|14725	0.0313595	0.310337	ENSG00000130997/ENSG00000276644/ENSG00000097046/ENSG00000143799/ENSG00000147536/ENSG00000153162/ENSG00000101972/ENSG00000125885/ENSG00000161692/ENSG00000147601/ENSG00000111445/ENSG00000020922/ENSG00000075131/ENSG00000117748/ENSG00000159147/ENSG00000085840/ENSG00000163918/ENSG00000127311/ENSG00000091651/ENSG00000070501/ENSG00000101868/ENSG00000094804/ENSG00000143971/ENSG00000065328/ENSG00000181938…	POLN/DACH1/CDC7/PARP1/GINS4/BMP6/STAG2/MCM8/DBF4B/TERF1/RFC5/MRE11/TIPIN/RPA2/DONSON/ORC1/RFC4/HELB/ORC6/POLB/POLA1/CDC6/ETAA1/MCM10/GINS3/SMC3/MMS22L/BLM/SMC1A/MGME1/DNA2/MCM9/RPA1	33
BP	GO:0006029	proteoglycan metabolic process	20|2417	80|14725	0.0317869	0.313605	ENSG00000162738/ENSG00000038427/ENSG00000162694/ENSG00000111817/ENSG00000198108/ENSG00000173376/ENSG00000122863/ENSG00000154080/ENSG00000164318/ENSG00000139219/ENSG00000112309/ENSG00000125430/ENSG00000107742/ENSG00000155893/ENSG00000116704/ENSG00000176678/ENSG00000173546/ENSG00000169826/ENSG00000137573/ENSG00000171004	VANGL2/VCAN/EXTL2/DSE/CHSY3/NDNF/CHST3/CHST9/EGFLAM/COL2A1/B3GAT2/HS3ST3B1/SPOCK2/PXYLP1/SLC35D1/FOXL1/CSPG4/CSGALNACT2/SULF1/HS6ST2	20
BP	GO:0051272	positive regulation of cellular component movement	85|2417	428|14725	0.0318293	0.313605	ENSG00000162493/ENSG00000091136/ENSG00000019549/ENSG00000076706/ENSG00000114251/ENSG00000181104/ENSG00000037280/ENSG00000102755/ENSG00000138795/ENSG00000115232/ENSG00000162733/ENSG00000122691/ENSG00000138685/ENSG00000183023/ENSG00000103241/ENSG00000119630/ENSG00000198121/ENSG00000117707/ENSG00000137285/ENSG00000075213/ENSG00000157404/ENSG00000101017/ENSG00000105137/ENSG00000118257/ENSG00000134954…	PDPN/LAMB1/SNAI2/MCAM/WNT5A/F2R/FLT4/FLT1/LEF1/ITGA4/DDR2/TWIST1/FGF2/SLC8A1/FOXF1/PGF/LPAR1/PROX1/TUBB2B/SEMA3A/KIT/CD40/SYDE1/NRP2/ETS1/JCAD/S1PR1/AKT3/INSM1/DOCK4/PAK1/ANGPT1/THBS4/PRKD1/MIR221/PLA2G7/ADGRA2/PAK3/ROR2/HDAC9/HAS2/IL12A/ARHGEF39/FER/CCBE1/HMOX1/DOCK7/SPARC/XCL1/FOXC2/SPRY2/SEMA6A/PDGFRA/SPOCK2/PTGS2/ITGA6/KIF3A/PDGFC/VEGFD/SWAP70/BAG4/C1QBP/ITGA5/EGFR/RUFY3/TMSB15B/MIA3/PDGFRB/M…	85
BP	GO:0032963	collagen metabolic process	24|2417	100|14725	0.0318571	0.313605	ENSG00000134871/ENSG00000110811/ENSG00000156140/ENSG00000197565/ENSG00000181104/ENSG00000187498/ENSG00000188517/ENSG00000160963/ENSG00000197467/ENSG00000188153/ENSG00000087116/ENSG00000204262/ENSG00000087245/ENSG00000139219/ENSG00000082293/ENSG00000142156/ENSG00000166173/ENSG00000117385/ENSG00000090530/ENSG00000196591/ENSG00000113721/ENSG00000172752/ENSG00000102760/ENSG00000144810	COL4A2/P3H3/ADAMTS3/COL4A6/F2R/COL4A1/COL25A1/COL26A1/COL13A1/COL4A5/ADAMTS2/COL5A2/MMP2/COL2A1/COL19A1/COL6A1/LARP6/P3H1/P3H2/HDAC2/PDGFRB/COL6A5/RGCC/COL8A1	24
BP	GO:0071695	anatomical structure maturation	32|2417	141|14725	0.0319182	0.313658	ENSG00000152661/ENSG00000106004/ENSG00000159184/ENSG00000128918/ENSG00000114251/ENSG00000115112/ENSG00000119866/ENSG00000163623/ENSG00000135298/ENSG00000166341/ENSG00000198945/ENSG00000070886/ENSG00000075891/ENSG00000136160/ENSG00000087245/ENSG00000100206/ENSG00000162367/ENSG00000133710/ENSG00000170989/ENSG00000122707/ENSG00000183688/ENSG00000196159/ENSG00000069482/ENSG00000163531/ENSG00000162769…	GJA1/HOXA5/HOXB13/ALDH1A2/WNT5A/TFCP2L1/BCL11A/NKX6-1/ADGRB3/DCHS1/L3MBTL3/EPHA8/PAX2/EDNRB/MMP2/DMC1/TAL1/SPINK5/S1PR1/RECK/RFLNB/FAT4/GAL/NFASC/FLVCR1/LRRK2/CLN5/SCLT1/SIX3/FBXO5/WNT10B/TRIM58	32
BP	GO:0045137	development of primary sexual characteristics	43|2417	199|14725	0.0322772	0.316439	ENSG00000154734/ENSG00000253293/ENSG00000005073/ENSG00000114251/ENSG00000103449/ENSG00000185008/ENSG00000145147/ENSG00000169946/ENSG00000005513/ENSG00000184937/ENSG00000078549/ENSG00000054598/ENSG00000276644/ENSG00000075213/ENSG00000164093/ENSG00000157404/ENSG00000104332/ENSG00000102230/ENSG00000100206/ENSG00000162624/ENSG00000106013/ENSG00000143355/ENSG00000149311/ENSG00000136352/ENSG00000184347…	ADAMTS1/HOXA10/HOXA11/WNT5A/SALL1/ROBO2/SLIT2/ZFPM2/SOX8/WT1/ADCYAP1R1/FOXC1/DACH1/SEMA3A/PITX2/KIT/SFRP1/PCYT1B/DMC1/LHX8/ANKRD7/LHX9/ATM/NKX2-1/SLIT3/DACH2/PDGFRA/ASPM/FGF9/NASP/WDR19/MSH4/CBL/NTRK1/PDGFRB/FNDC3A/NR5A1/OSR1/RRM1/RDH10/SIRT1/AGO4/MSH2	43
BP	GO:0099531	presynaptic process involved in chemical synaptic transmission	31|2417	136|14725	0.0324634	0.316439	ENSG00000100505/ENSG00000145335/ENSG00000148408/ENSG00000169760/ENSG00000143858/ENSG00000108576/ENSG00000116396/ENSG00000101298/ENSG00000081189/ENSG00000160469/ENSG00000110076/ENSG00000157152/ENSG00000134207/ENSG00000186472/ENSG00000176406/ENSG00000111450/ENSG00000021645/ENSG00000188906/ENSG00000185666/ENSG00000105737/ENSG00000204176/ENSG00000103528/ENSG00000102081/ENSG00000170743/ENSG00000136750…	TRIM9/SNCA/CACNA1B/NLGN1/SYT2/SLC6A4/KCNC4/SNPH/MEF2C/BRSK1/NRXN2/SYN2/SYT6/PCLO/RIMS2/STX2/NRXN3/LRRK2/SYN3/GRIK5/SYT15/SYT17/FMR1/SYT9/GAD2/PPFIA2/RIMS1/CHRNA3/SYT11/PRKN/SYNJ1	31
BP	GO:0000729	DNA double-strand break processing	8|2417	24|14725	0.032539	0.316439	ENSG00000149311/ENSG00000134758/ENSG00000020922/ENSG00000127311/ENSG00000012048/ENSG00000163104/ENSG00000197299/ENSG00000138346	ATM/RNF138/MRE11/HELB/BRCA1/SMARCAD1/BLM/DNA2	8
BP	GO:0045992	negative regulation of embryonic development	8|2417	24|14725	0.032539	0.316439	ENSG00000114251/ENSG00000143147/ENSG00000072133/ENSG00000204262/ENSG00000204104/ENSG00000137573/ENSG00000142875/ENSG00000104290	WNT5A/GPR161/RPS6KA6/COL5A2/TRAF3IP1/SULF1/PRKACB/FZD3	8
BP	GO:0060037	pharyngeal system development	8|2417	24|14725	0.032539	0.316439	ENSG00000184058/ENSG00000183072/ENSG00000016082/ENSG00000185920/ENSG00000104313/ENSG00000076356/ENSG00000126778/ENSG00000183691	TBX1/NKX2-5/ISL1/PTCH1/EYA1/PLXNA2/SIX1/NOG	8
BP	GO:0060632	regulation of microtubule-based movement	8|2417	24|14725	0.032539	0.316439	ENSG00000169126/ENSG00000154429/ENSG00000131437/ENSG00000139537/ENSG00000105877/ENSG00000162722/ENSG00000149557/ENSG00000284862	ARMC4/CCSAP/KIF3A/CCDC65/DNAH11/TRIM58/FEZ1/CCDC39	8
BP	GO:0006302	double-strand break repair	45|2417	210|14725	0.033091	0.317667	ENSG00000147231/ENSG00000149948/ENSG00000133863/ENSG00000166313/ENSG00000122691/ENSG00000130997/ENSG00000174010/ENSG00000186280/ENSG00000104313/ENSG00000097046/ENSG00000143799/ENSG00000100206/ENSG00000149311/ENSG00000147536/ENSG00000207870/ENSG00000156384/ENSG00000169621/ENSG00000134758/ENSG00000125885/ENSG00000112130/ENSG00000247746/ENSG00000158161/ENSG00000173559/ENSG00000111247/ENSG00000152422…	CXorf57/HMGA2/TEX15/APBB1/TWIST1/POLN/KLHL15/KDM4D/EYA1/CDC7/PARP1/DMC1/ATM/GINS4/MIR221/SFR1/APLF/RNF138/MCM8/RNF8/USP51/EYA3/NABP1/RAD51AP1/XRCC4/MRE11/RPA2/MEIOC/HELB/BRCA1/POLA1/PRKDC/SFPQ/DCLRE1A/ERCC4/SMARCAD1/RAD54L/CHEK1/MMS22L/BLM/MND1/DNA2/MCM9/MSH2/RPA1	45
BP	GO:0030166	proteoglycan biosynthetic process	15|2417	56|14725	0.0331599	0.317667	ENSG00000162738/ENSG00000038427/ENSG00000162694/ENSG00000111817/ENSG00000198108/ENSG00000122863/ENSG00000154080/ENSG00000112309/ENSG00000125430/ENSG00000155893/ENSG00000116704/ENSG00000176678/ENSG00000173546/ENSG00000169826/ENSG00000171004	VANGL2/VCAN/EXTL2/DSE/CHSY3/CHST3/CHST9/B3GAT2/HS3ST3B1/PXYLP1/SLC35D1/FOXL1/CSPG4/CSGALNACT2/HS6ST2	15
BP	GO:0008217	regulation of blood pressure	34|2417	152|14725	0.0336066	0.317667	ENSG00000152661/ENSG00000181104/ENSG00000148408/ENSG00000099139/ENSG00000007171/ENSG00000196549/ENSG00000134548/ENSG00000136160/ENSG00000072657/ENSG00000131477/ENSG00000111664/ENSG00000164116/ENSG00000145244/ENSG00000171388/ENSG00000186951/ENSG00000144596/ENSG00000144891/ENSG00000153904/ENSG00000100292/ENSG00000073756/ENSG00000151490/ENSG00000122585/ENSG00000166148/ENSG00000175344/ENSG00000174059…	GJA1/F2R/CACNA1B/PCSK5/NOS2/MME/SPX/EDNRB/TRHDE/RAMP2/GNB3/GUCY1A1/CORIN/APLN/PPARA/GRIP2/AGTR1/DDAH1/HMOX1/PTGS2/PTPRO/NPY/AVPR1A/CHRNA7/CD34/NOX1/UTS2R/NMU/PRCP/SLC4A5/TAC4/EDNRA/POMC/CTSZ	34
BP	GO:0045599	negative regulation of fat cell differentiation	12|2417	42|14725	0.0336784	0.317667	ENSG00000114251/ENSG00000169946/ENSG00000069667/ENSG00000181004/ENSG00000150907/ENSG00000071575/ENSG00000186897/ENSG00000169884/ENSG00000172201/ENSG00000079102/ENSG00000154342/ENSG00000096717	WNT5A/ZFPM2/RORA/BBS12/FOXO1/TRIB2/C1QL4/WNT10B/ID4/RUNX1T1/WNT3A/SIRT1	12
BP	GO:2000649	regulation of sodium ion transmembrane transporter activity	12|2417	42|14725	0.0336784	0.317667	ENSG00000089327/ENSG00000196632/ENSG00000198947/ENSG00000177098/ENSG00000152818/ENSG00000166257/ENSG00000137726/ENSG00000108961/ENSG00000182533/ENSG00000149575/ENSG00000171208/ENSG00000143867	FXYD5/WNK3/DMD/SCN4B/UTRN/SCN3B/FXYD6/RANGRF/CAV3/SCN2B/NETO2/OSR1	12
BP	GO:0003207	cardiac chamber formation	5|2417	12|14725	0.0341787	0.317667	ENSG00000183072/ENSG00000113196/ENSG00000164107/ENSG00000081189/ENSG00000164532	NKX2-5/HAND1/HAND2/MEF2C/TBX20	5
BP	GO:0007351	tripartite regional subdivision	5|2417	12|14725	0.0341787	0.317667	ENSG00000114251/ENSG00000184937/ENSG00000175879/ENSG00000164458/ENSG00000135111	WNT5A/WT1/HOXD8/TBXT/TBX3	5
BP	GO:0007379	segment specification	5|2417	12|14725	0.0341787	0.317667	ENSG00000143033/ENSG00000105996/ENSG00000143867/ENSG00000005102/ENSG00000171843	MTF2/HOXA2/OSR1/MEOX1/MLLT3	5
BP	GO:0007501	mesodermal cell fate specification	5|2417	12|14725	0.0341787	0.317667	ENSG00000005073/ENSG00000170577/ENSG00000104313/ENSG00000075891/ENSG00000154342	HOXA11/SIX2/EYA1/PAX2/WNT3A	5
BP	GO:0008595	anterior/posterior axis specification, embryo	5|2417	12|14725	0.0341787	0.317667	ENSG00000114251/ENSG00000184937/ENSG00000175879/ENSG00000164458/ENSG00000135111	WNT5A/WT1/HOXD8/TBXT/TBX3	5
BP	GO:0010457	centriole-centriole cohesion	5|2417	12|14725	0.0341787	0.317667	ENSG00000044459/ENSG00000174799/ENSG00000131437/ENSG00000117650/ENSG00000100503	CNTLN/CEP135/KIF3A/NEK2/NIN	5
BP	GO:0021681	cerebellar granular layer development	5|2417	12|14725	0.0341787	0.317667	ENSG00000117707/ENSG00000135919/ENSG00000128881/ENSG00000152208/ENSG00000102924	PROX1/SERPINE2/TTBK2/GRID2/CBLN1	5
BP	GO:0021978	telencephalon regionalization	5|2417	12|14725	0.0341787	0.317667	ENSG00000007372/ENSG00000142700/ENSG00000170370/ENSG00000135638/ENSG00000138083	PAX6/DMRTA2/EMX2/EMX1/SIX3	5
BP	GO:0042574	retinal metabolic process	5|2417	12|14725	0.0341787	0.317667	ENSG00000128918/ENSG00000186684/ENSG00000118514/ENSG00000197580/ENSG00000121039	ALDH1A2/CYP27C1/ALDH8A1/BCO2/RDH10	5
BP	GO:0045019	negative regulation of nitric oxide biosynthetic process	5|2417	12|14725	0.0341787	0.317667	ENSG00000118965/ENSG00000124212/ENSG00000174059/ENSG00000058668/ENSG00000102393	WDR35/PTGIS/CD34/ATP2B4/GLA	5
BP	GO:0060272	embryonic skeletal joint morphogenesis	5|2417	12|14725	0.0341787	0.317667	ENSG00000005073/ENSG00000168779/ENSG00000139219/ENSG00000183691/ENSG00000143867	HOXA11/SHOX2/COL2A1/NOG/OSR1	5
BP	GO:0060601	lateral sprouting from an epithelium	5|2417	12|14725	0.0341787	0.317667	ENSG00000162738/ENSG00000074047/ENSG00000114251/ENSG00000183691/ENSG00000137573	VANGL2/GLI2/WNT5A/NOG/SULF1	5
BP	GO:0061430	bone trabecula morphogenesis	5|2417	12|14725	0.0341787	0.317667	ENSG00000138829/ENSG00000104332/ENSG00000087245/ENSG00000155846/ENSG00000169884	FBN2/SFRP1/MMP2/PPARGC1B/WNT10B	5
BP	GO:0061548	ganglion development	5|2417	12|14725	0.0341787	0.317667	ENSG00000075213/ENSG00000118257/ENSG00000173404/ENSG00000126778/ENSG00000104290	SEMA3A/NRP2/INSM1/SIX1/FZD3	5
BP	GO:0070493	thrombin-activated receptor signaling pathway	5|2417	12|14725	0.0341787	0.317667	ENSG00000145703/ENSG00000181104/ENSG00000145335/ENSG00000185245/ENSG00000115956	IQGAP2/F2R/SNCA/GP1BA/PLEK	5
BP	GO:0070986	left/right axis specification	5|2417	12|14725	0.0341787	0.317667	ENSG00000128602/ENSG00000164093/ENSG00000138587/ENSG00000081870/ENSG00000158683	SMO/PITX2/MNS1/HSPB11/PKD1L1	5
BP	GO:0098703	calcium ion import across plasma membrane	5|2417	12|14725	0.0341787	0.317667	ENSG00000010810/ENSG00000153956/ENSG00000196689/ENSG00000100678/ENSG00000058668	FYN/CACNA2D1/TRPV1/SLC8A3/ATP2B4	5
BP	GO:1900746	regulation of vascular endothelial growth factor signaling pathway	5|2417	12|14725	0.0341787	0.317667	ENSG00000156140/ENSG00000196628/ENSG00000165757/ENSG00000020181/ENSG00000183287	ADAMTS3/TCF4/JCAD/ADGRA2/CCBE1	5
BP	GO:1902656	calcium ion import into cytosol	5|2417	12|14725	0.0341787	0.317667	ENSG00000010810/ENSG00000153956/ENSG00000196689/ENSG00000100678/ENSG00000058668	FYN/CACNA2D1/TRPV1/SLC8A3/ATP2B4	5
BP	GO:1904406	negative regulation of nitric oxide metabolic process	5|2417	12|14725	0.0341787	0.317667	ENSG00000118965/ENSG00000124212/ENSG00000174059/ENSG00000058668/ENSG00000102393	WDR35/PTGIS/CD34/ATP2B4/GLA	5
BP	GO:2000846	regulation of corticosteroid hormone secretion	5|2417	12|14725	0.0341787	0.317667	ENSG00000153162/ENSG00000069482/ENSG00000144891/ENSG00000173918/ENSG00000115138	BMP6/GAL/AGTR1/C1QTNF1/POMC	5
BP	GO:0001774	microglial cell activation	7|2417	20|14725	0.0343607	0.317667	ENSG00000145335/ENSG00000149311/ENSG00000174130/ENSG00000196689/ENSG00000188906/ENSG00000184599/ENSG00000177606	SNCA/ATM/TLR6/TRPV1/LRRK2/FAM19A3/JUN	7
BP	GO:0002052	positive regulation of neuroblast proliferation	7|2417	20|14725	0.0343607	0.317667	ENSG00000128602/ENSG00000007372/ENSG00000176165/ENSG00000142700/ENSG00000162946/ENSG00000066279/ENSG00000104290	SMO/PAX6/FOXG1/DMRTA2/DISC1/ASPM/FZD3	7
BP	GO:0072012	glomerulus vasculature development	7|2417	20|14725	0.0343607	0.317667	ENSG00000184937/ENSG00000154188/ENSG00000176692/ENSG00000134853/ENSG00000174059/ENSG00000113721/ENSG00000143867	WT1/ANGPT1/FOXC2/PDGFRA/CD34/PDGFRB/OSR1	7
BP	GO:2000463	positive regulation of excitatory postsynaptic potential	7|2417	20|14725	0.0343607	0.317667	ENSG00000169760/ENSG00000111249/ENSG00000196338/ENSG00000176406/ENSG00000175344/ENSG00000161681/ENSG00000079841	NLGN1/CUX2/NLGN3/RIMS2/CHRNA7/SHANK1/RIMS1	7
BP	GO:0060048	cardiac muscle contraction	26|2417	111|14725	0.0348321	0.320054	ENSG00000152661/ENSG00000145362/ENSG00000182963/ENSG00000183072/ENSG00000183873/ENSG00000153956/ENSG00000183023/ENSG00000213366/ENSG00000108984/ENSG00000198947/ENSG00000116741/ENSG00000155657/ENSG00000177098/ENSG00000166257/ENSG00000165995/ENSG00000182533/ENSG00000149575/ENSG00000119782/ENSG00000046604/ENSG00000134755/ENSG00000184588/ENSG00000113569/ENSG00000075142/ENSG00000151067/ENSG00000155962…	GJA1/ANK2/GJC1/NKX2-5/SCN5A/CACNA2D1/SLC8A1/GSTM2/MAP2K6/DMD/RGS2/TTN/SCN4B/SCN3B/CACNB2/CAV3/SCN2B/FKBP1B/DSG2/DSC2/PDE4B/NUP155/SRI/CACNA1C/CLIC2/KCNQ1	26
BP	GO:0099504	synaptic vesicle cycle	26|2417	111|14725	0.0348321	0.320054	ENSG00000170558/ENSG00000100505/ENSG00000145335/ENSG00000169760/ENSG00000143858/ENSG00000101298/ENSG00000197959/ENSG00000107295/ENSG00000102003/ENSG00000134207/ENSG00000196338/ENSG00000186472/ENSG00000176406/ENSG00000111450/ENSG00000188906/ENSG00000106976/ENSG00000105737/ENSG00000205726/ENSG00000204176/ENSG00000103528/ENSG00000102081/ENSG00000170743/ENSG00000079841/ENSG00000132718/ENSG00000154342…	CDH2/TRIM9/SNCA/NLGN1/SYT2/SNPH/DNM3/SH3GL2/SYP/SYT6/NLGN3/PCLO/RIMS2/STX2/LRRK2/DNM1/GRIK5/ITSN1/SYT15/SYT17/FMR1/SYT9/RIMS1/SYT11/WNT3A/SYNJ1	26
BP	GO:0001710	mesodermal cell fate commitment	6|2417	16|14725	0.0352452	0.320054	ENSG00000005073/ENSG00000170577/ENSG00000104313/ENSG00000075891/ENSG00000176692/ENSG00000154342	HOXA11/SIX2/EYA1/PAX2/FOXC2/WNT3A	6
BP	GO:0002070	epithelial cell maturation	6|2417	16|14725	0.0352452	0.320054	ENSG00000152661/ENSG00000106004/ENSG00000159184/ENSG00000115112/ENSG00000163623/ENSG00000138083	GJA1/HOXA5/HOXB13/TFCP2L1/NKX6-1/SIX3	6
BP	GO:0006582	melanin metabolic process	6|2417	16|14725	0.0352452	0.320054	ENSG00000125931/ENSG00000114251/ENSG00000169554/ENSG00000104044/ENSG00000144935/ENSG00000164175	CITED1/WNT5A/ZEB2/OCA2/TRPC1/SLC45A2	6
BP	GO:0030825	positive regulation of cGMP metabolic process	6|2417	16|14725	0.0352452	0.320054	ENSG00000114251/ENSG00000007171/ENSG00000188729/ENSG00000152402/ENSG00000164116/ENSG00000170425	WNT5A/NOS2/OSTN/GUCY1A2/GUCY1A1/ADORA2B	6
BP	GO:0030903	notochord development	6|2417	16|14725	0.0352452	0.320054	ENSG00000074047/ENSG00000114251/ENSG00000139219/ENSG00000183691/ENSG00000111087/ENSG00000164458	GLI2/WNT5A/COL2A1/NOG/GLI1/TBXT	6
BP	GO:0055012	ventricular cardiac muscle cell differentiation	6|2417	16|14725	0.0352452	0.320054	ENSG00000183072/ENSG00000077092/ENSG00000117707/ENSG00000081189/ENSG00000164093/ENSG00000133026	NKX2-5/RARB/PROX1/MEF2C/PITX2/MYH10	6
BP	GO:0060572	morphogenesis of an epithelial bud	6|2417	16|14725	0.0352452	0.320054	ENSG00000074047/ENSG00000114251/ENSG00000171243/ENSG00000183691/ENSG00000137573/ENSG00000121039	GLI2/WNT5A/SOSTDC1/NOG/SULF1/RDH10	6
BP	GO:0060850	regulation of transcription involved in cell fate commitment	6|2417	16|14725	0.0352452	0.320054	ENSG00000007372/ENSG00000163623/ENSG00000117707/ENSG00000138136/ENSG00000115844/ENSG00000069667	PAX6/NKX6-1/PROX1/LBX1/DLX2/RORA	6
BP	GO:1903421	regulation of synaptic vesicle recycling	6|2417	16|14725	0.0352452	0.320054	ENSG00000145335/ENSG00000169760/ENSG00000197959/ENSG00000188906/ENSG00000106976/ENSG00000132718	SNCA/NLGN1/DNM3/LRRK2/DNM1/SYT11	6
BP	GO:0002040	sprouting angiogenesis	24|2417	101|14725	0.0354975	0.321825	ENSG00000037280/ENSG00000138795/ENSG00000138685/ENSG00000145147/ENSG00000119630/ENSG00000101445/ENSG00000131477/ENSG00000165757/ENSG00000117020/ENSG00000112333/ENSG00000154188/ENSG00000207870/ENSG00000020181/ENSG00000048052/ENSG00000144891/ENSG00000164619/ENSG00000183287/ENSG00000100292/ENSG00000176692/ENSG00000092421/ENSG00000073756/ENSG00000161638/ENSG00000207744/ENSG00000210741	FLT4/LEF1/FGF2/SLIT2/PGF/PPP1R16B/RAMP2/JCAD/AKT3/NR2E1/ANGPT1/MIR221/ADGRA2/HDAC9/AGTR1/BMPER/CCBE1/HMOX1/FOXC2/SEMA6A/PTGS2/ITGA5/MIR10B/MIR196A1	24
BP	GO:0046530	photoreceptor cell differentiation	13|2417	47|14725	0.0356843	0.321904	ENSG00000007372/ENSG00000005513/ENSG00000148600/ENSG00000140807/ENSG00000115844/ENSG00000069188/ENSG00000198707/ENSG00000180376/ENSG00000198963/ENSG00000242689/ENSG00000148053/ENSG00000135049/ENSG00000095464	PAX6/SOX8/CDHR1/NKD1/DLX2/SDK2/CEP290/CCDC66/RORB/CNTF/NTRK2/AGTPBP1/PDE6C	13
BP	GO:1901862	negative regulation of muscle tissue development	13|2417	47|14725	0.0356843	0.321904	ENSG00000152661/ENSG00000138795/ENSG00000122691/ENSG00000110693/ENSG00000154928/ENSG00000149269/ENSG00000095587/ENSG00000078900/ENSG00000143995/ENSG00000182533/ENSG00000138379/ENSG00000183691/ENSG00000151748	GJA1/LEF1/TWIST1/SOX6/EPHB1/PAK1/TLL2/TP73/MEIS1/CAV3/MSTN/NOG/SAV1	13
BP	GO:2000242	negative regulation of reproductive process	13|2417	47|14725	0.0356843	0.321904	ENSG00000114251/ENSG00000169946/ENSG00000184937/ENSG00000132386/ENSG00000123612/ENSG00000085465/ENSG00000112029/ENSG00000112742/ENSG00000136931/ENSG00000137573/ENSG00000142875/ENSG00000183134/ENSG00000095002	WNT5A/ZFPM2/WT1/SERPINF1/ACVR1C/OVGP1/FBXO5/TTK/NR5A1/SULF1/PRKACB/PTGDR2/MSH2	13
BP	GO:0014013	regulation of gliogenesis	23|2417	96|14725	0.0357353	0.321904	ENSG00000170558/ENSG00000181690/ENSG00000146122/ENSG00000163623/ENSG00000205927/ENSG00000005513/ENSG00000136717/ENSG00000115844/ENSG00000135919/ENSG00000125820/ENSG00000112333/ENSG00000078900/ENSG00000207870/ENSG00000135638/ENSG00000107859/ENSG00000106278/ENSG00000196591/ENSG00000183691/ENSG00000130396/ENSG00000254087/ENSG00000172201/ENSG00000265763/ENSG00000159082	CDH2/PLAG1/DAAM2/NKX6-1/OLIG2/SOX8/BIN1/DLX2/SERPINE2/NKX2-2/NR2E1/TP73/MIR221/EMX1/PITX3/PTPRZ1/HDAC2/NOG/AFDN/LYN/ID4/ZNF488/SYNJ1	23
BP	GO:0033138	positive regulation of peptidyl-serine phosphorylation	20|2417	81|14725	0.0359121	0.322979	ENSG00000114251/ENSG00000145335/ENSG00000116329/ENSG00000121236/ENSG00000149269/ENSG00000154188/ENSG00000184304/ENSG00000110888/ENSG00000116641/ENSG00000136158/ENSG00000073756/ENSG00000175344/ENSG00000134072/ENSG00000148053/ENSG00000156735/ENSG00000009694/ENSG00000146648/ENSG00000058668/ENSG00000052795/ENSG00000154342	WNT5A/SNCA/OPRD1/TRIM6/PAK1/ANGPT1/PRKD1/CAPRIN2/DOCK7/SPRY2/PTGS2/CHRNA7/CAMK1/NTRK2/BAG4/TENM1/EGFR/ATP2B4/FNIP2/WNT3A	20
BP	GO:0097755	positive regulation of blood vessel diameter	14|2417	52|14725	0.0372332	0.334326	ENSG00000152661/ENSG00000233276/ENSG00000213949/ENSG00000007171/ENSG00000116741/ENSG00000173482/ENSG00000136160/ENSG00000185532/ENSG00000164116/ENSG00000128512/ENSG00000170425/ENSG00000171388/ENSG00000100292/ENSG00000146648	GJA1/GPX1/ITGA1/NOS2/RGS2/PTPRM/EDNRB/PRKG1/GUCY1A1/DOCK4/ADORA2B/APLN/HMOX1/EGFR	14
BP	GO:0014003	oligodendrocyte development	11|2417	38|14725	0.0375139	0.334708	ENSG00000084207/ENSG00000198121/ENSG00000124920/ENSG00000125820/ENSG00000132970/ENSG00000152784/ENSG00000254087/ENSG00000172201/ENSG00000265763/ENSG00000108797/ENSG00000070785	GSTP1/LPAR1/MYRF/NKX2-2/WASF3/PRDM8/LYN/ID4/ZNF488/CNTNAP1/EIF2B3	11
BP	GO:0033683	nucleotide-excision repair, DNA incision	11|2417	38|14725	0.0375139	0.334708	ENSG00000145736/ENSG00000143799/ENSG00000158290/ENSG00000111445/ENSG00000272047/ENSG00000117748/ENSG00000122008/ENSG00000163918/ENSG00000111358/ENSG00000175595/ENSG00000132383	GTF2H2/PARP1/CUL4B/RFC5/GTF2H5/RPA2/POLK/RFC4/GTF2H3/ERCC4/RPA1	11
BP	GO:0097366	response to bronchodilator	11|2417	38|14725	0.0375139	0.334708	ENSG00000061918/ENSG00000116984/ENSG00000048052/ENSG00000240583/ENSG00000150907/ENSG00000107614/ENSG00000196591/ENSG00000135766/ENSG00000165704/ENSG00000138668/ENSG00000123360	GUCY1B1/MTR/HDAC9/AQP1/FOXO1/TRDMT1/HDAC2/EGLN1/HPRT1/HNRNPD/PDE1B	11
BP	GO:1903727	positive regulation of phospholipid metabolic process	11|2417	38|14725	0.0375139	0.334708	ENSG00000102755/ENSG00000138685/ENSG00000070886/ENSG00000157404/ENSG00000184304/ENSG00000147246/ENSG00000097033/ENSG00000134853/ENSG00000121769/ENSG00000113721/ENSG00000254087	FLT1/FGF2/EPHA8/KIT/PRKD1/HTR2C/SH3GLB1/PDGFRA/FABP3/PDGFRB/LYN	11
BP	GO:0098801	regulation of renal system process	9|2417	29|14725	0.0377285	0.335557	ENSG00000152661/ENSG00000181104/ENSG00000134548/ENSG00000136160/ENSG00000145244/ENSG00000144891/ENSG00000151490/ENSG00000166148/ENSG00000181408	GJA1/F2R/SPX/EDNRB/CORIN/AGTR1/PTPRO/AVPR1A/UTS2R	9
BP	GO:1901385	regulation of voltage-gated calcium channel activity	9|2417	29|14725	0.0377285	0.335557	ENSG00000182389/ENSG00000153956/ENSG00000198947/ENSG00000165995/ENSG00000146729/ENSG00000184588/ENSG00000102081/ENSG00000144681/ENSG00000075142	CACNB4/CACNA2D1/DMD/CACNB2/NIPSNAP2/PDE4B/FMR1/STAC/SRI	9
BP	GO:0050806	positive regulation of synaptic transmission	27|2417	117|14725	0.0379857	0.33731	ENSG00000079215/ENSG00000121297/ENSG00000168824/ENSG00000145335/ENSG00000169760/ENSG00000111249/ENSG00000154146/ENSG00000135919/ENSG00000196569/ENSG00000112333/ENSG00000108852/ENSG00000104267/ENSG00000196338/ENSG00000169071/ENSG00000176406/ENSG00000100678/ENSG00000073756/ENSG00000175344/ENSG00000148053/ENSG00000102081/ENSG00000146648/ENSG00000109255/ENSG00000198400/ENSG00000169220/ENSG00000161681…	SLC1A3/TSHZ3/NSG1/SNCA/NLGN1/CUX2/NRGN/SERPINE2/LAMA2/NR2E1/MPP2/CA2/NLGN3/ROR2/RIMS2/SLC8A3/PTGS2/CHRNA7/NTRK2/FMR1/EGFR/NMU/NTRK1/RGS14/SHANK1/RIMS1/RAPSN	27
BP	GO:0023061	signal release	75|2417	376|14725	0.0381509	0.338243	ENSG00000152661/ENSG00000116729/ENSG00000169860/ENSG00000016082/ENSG00000100505/ENSG00000145335/ENSG00000143195/ENSG00000148408/ENSG00000163623/ENSG00000169760/ENSG00000143858/ENSG00000007171/ENSG00000145087/ENSG00000145242/ENSG00000116396/ENSG00000101298/ENSG00000081189/ENSG00000123612/ENSG00000160469/ENSG00000139515/ENSG00000104332/ENSG00000277443/ENSG00000110076/ENSG00000157152/ENSG00000091428…	GJA1/WLS/P2RY1/ISL1/TRIM9/SNCA/ILDR2/CACNA1B/NKX6-1/NLGN1/SYT2/NOS2/STXBP5L/EPHA5/KCNC4/SNPH/MEF2C/ACVR1C/BRSK1/PDX1/SFRP1/MARCKS/NRXN2/SYN2/RAPGEF4/SYT6/BMP6/PCLO/GAL/APLN/RIMS2/AGTR1/STX2/NRXN3/LRRK2/HTR2C/FKBP1B/SYN3/BRSK2/GRIK5/C1QTNF1/ABCC8/SYT15/RAB11FIP2/SYBU/SLC30A8/SYT17/ACVR2B/FMR1/STXBP4/SYT9/EGFR/RFX6/SLC9B2/NMU/GAD2/RAB11FIP5/BIRC5/PPFIA2/SRI/RIMS1/CHRNA3/OXCT1/CACNA2D2/SYT11/CACNA1C…	75
BP	GO:1901215	negative regulation of neuron death	39|2417	180|14725	0.0383978	0.339394	ENSG00000277586/ENSG00000125931/ENSG00000152192/ENSG00000181104/ENSG00000010810/ENSG00000016082/ENSG00000145335/ENSG00000163064/ENSG00000132386/ENSG00000171956/ENSG00000173376/ENSG00000081189/ENSG00000198908/ENSG00000162877/ENSG00000154188/ENSG00000132821/ENSG00000078900/ENSG00000186951/ENSG00000164778/ENSG00000122756/ENSG00000188906/ENSG00000196660/ENSG00000100292/ENSG00000126778/ENSG00000205726…	NEFL/CITED1/POU4F1/F2R/FYN/ISL1/SNCA/EN1/SERPINF1/FOXB1/NDNF/MEF2C/BHLHB9/PM20D1/ANGPT1/VSTM2L/TP73/PPARA/EN2/CNTFR/LRRK2/SLC30A10/HMOX1/SIX1/ITSN1/SNCB/CNTF/NTRK2/GCLM/CD34/UNC5B/CBL/NTRK1/BIRC5/WNT3A/SIRT1/JUN/PRKN/MSH2	39
BP	GO:0022029	telencephalon cell migration	15|2417	57|14725	0.0384015	0.339394	ENSG00000184486/ENSG00000091136/ENSG00000176165/ENSG00000145147/ENSG00000198914/ENSG00000171956/ENSG00000075213/ENSG00000112333/ENSG00000136352/ENSG00000172728/ENSG00000188906/ENSG00000150764/ENSG00000146648/ENSG00000158748/ENSG00000096093	POU3F2/LAMB1/FOXG1/SLIT2/POU3F3/FOXB1/SEMA3A/NR2E1/NKX2-1/FUT10/LRRK2/DIXDC1/EGFR/HTR6/EFHC1	15
BP	GO:0022612	gland morphogenesis	26|2417	112|14725	0.0385163	0.339874	ENSG00000074047/ENSG00000159184/ENSG00000143869/ENSG00000147065/ENSG00000181690/ENSG00000128714/ENSG00000019549/ENSG00000114251/ENSG00000007372/ENSG00000185920/ENSG00000117707/ENSG00000075213/ENSG00000104332/ENSG00000171243/ENSG00000182533/ENSG00000041982/ENSG00000158813/ENSG00000183691/ENSG00000111087/ENSG00000146648/ENSG00000070501/ENSG00000137573/ENSG00000172201/ENSG00000125686/ENSG00000154342…	GLI2/HOXB13/GDF7/MSN/PLAG1/HOXD13/SNAI2/WNT5A/PAX6/PTCH1/PROX1/SEMA3A/SFRP1/SOSTDC1/CAV3/TNC/EDA/NOG/GLI1/EGFR/POLB/SULF1/ID4/MED1/WNT3A/TBX3	26
BP	GO:0016055	Wnt signaling pathway	90|2417	460|14725	0.0389586	0.343102	ENSG00000170558/ENSG00000147257/ENSG00000162409/ENSG00000170689/ENSG00000162738/ENSG00000116729/ENSG00000135272/ENSG00000116141/ENSG00000131668/ENSG00000146122/ENSG00000125931/ENSG00000019549/ENSG00000114251/ENSG00000183072/ENSG00000103449/ENSG00000016082/ENSG00000087258/ENSG00000112837/ENSG00000138795/ENSG00000169554/ENSG00000154310/ENSG00000185483/ENSG00000058091/ENSG00000122870/ENSG00000081059…	CDH2/GPC3/PRKAA2/HOXB9/VANGL2/WLS/MDFIC/MARK1/BARX1/DAAM2/CITED1/SNAI2/WNT5A/NKX2-5/SALL1/ISL1/GNAO1/TBX18/LEF1/ZEB2/TNIK/ROR1/CDK14/BICC1/TCF7/PYGO1/NXN/DACT1/DLX5/DKK3/NKD1/TLE4/GNG2/PITX2/SFRP1/LGR5/LRP4/RBMS3/TRABD2B/SOSTDC1/ARL6/DACT3/GRK5/ROR2/RSPO4/RNF138/ANKRD6/GRB10/CAPRIN2/CTR9/AGO3/AP2A2/LRRK2/DISC1/CYLD/TRABD2A/FOXO1/PTPRO/FOXL1/ZBTB33/TMEM237/EDA/ASPM/DIXDC1/SIX3/NOG/FGF9/GLI1/PSMD10…	90
BP	GO:0046660	female sex differentiation	25|2417	107|14725	0.0390041	0.343102	ENSG00000154734/ENSG00000114251/ENSG00000185008/ENSG00000145147/ENSG00000169946/ENSG00000184937/ENSG00000078549/ENSG00000054598/ENSG00000276644/ENSG00000164093/ENSG00000157404/ENSG00000104332/ENSG00000102230/ENSG00000153208/ENSG00000100206/ENSG00000162624/ENSG00000143355/ENSG00000149311/ENSG00000184347/ENSG00000126733/ENSG00000134853/ENSG00000057468/ENSG00000136931/ENSG00000096717/ENSG00000135111	ADAMTS1/WNT5A/ROBO2/SLIT2/ZFPM2/WT1/ADCYAP1R1/FOXC1/DACH1/PITX2/KIT/SFRP1/PCYT1B/MERTK/DMC1/LHX8/LHX9/ATM/SLIT3/DACH2/PDGFRA/MSH4/NR5A1/SIRT1/TBX3	25
BP	GO:0090287	regulation of cellular response to growth factor stimulus	49|2417	234|14725	0.0393961	0.346008	ENSG00000147257/ENSG00000138829/ENSG00000148516/ENSG00000156140/ENSG00000196628/ENSG00000125931/ENSG00000114251/ENSG00000069702/ENSG00000102755/ENSG00000138685/ENSG00000166501/ENSG00000145147/ENSG00000144868/ENSG00000198689/ENSG00000050165/ENSG00000198947/ENSG00000077943/ENSG00000133104/ENSG00000104332/ENSG00000170801/ENSG00000101938/ENSG00000156535/ENSG00000165757/ENSG00000141622/ENSG00000136352…	GPC3/FBN2/ZEB1/ADAMTS3/TCF4/CITED1/WNT5A/TGFBR3/FLT1/FGF2/PRKCB/SLIT2/TMEM108/SLC9A6/DKK3/DMD/ITGA8/SPART/SFRP1/HTRA3/CHRDL1/CD109/JCAD/RNF165/NKX2-1/MSX1/SOSTDC1/ADGRA2/WASF1/RGMA/SKOR1/APLN/CAV3/OTX2/GRB10/BMPER/CCBE1/LRIT3/SPRY2/NOG/FGF9/ITGA5/ONECUT2/MIR10B/RBPMS2/SULF1/FBN1/FBN3/SIRT1	49
BP	GO:0043535	regulation of blood vessel endothelial cell migration	23|2417	97|14725	0.0398133	0.348278	ENSG00000138685/ENSG00000081189/ENSG00000101017/ENSG00000134954/ENSG00000165757/ENSG00000117020/ENSG00000112333/ENSG00000154188/ENSG00000184304/ENSG00000207870/ENSG00000048052/ENSG00000100292/ENSG00000176692/ENSG00000073756/ENSG00000071246/ENSG00000137509/ENSG00000207744/ENSG00000154229/ENSG00000166025/ENSG00000102760/ENSG00000210741/ENSG00000096717/ENSG00000204435	FGF2/MEF2C/CD40/ETS1/JCAD/AKT3/NR2E1/ANGPT1/PRKD1/MIR221/HDAC9/HMOX1/FOXC2/PTGS2/VASH1/PRCP/MIR10B/PRKCA/AMOTL1/RGCC/MIR196A1/SIRT1/CSNK2B	23
BP	GO:0051279	regulation of release of sequestered calcium ion into cytosol	17|2417	67|14725	0.0398404	0.348278	ENSG00000145362/ENSG00000181104/ENSG00000145335/ENSG00000183023/ENSG00000213366/ENSG00000198947/ENSG00000177455/ENSG00000154127/ENSG00000184304/ENSG00000144935/ENSG00000119782/ENSG00000143184/ENSG00000075142/ENSG00000151067/ENSG00000254087/ENSG00000155962/ENSG00000151320	ANK2/F2R/SNCA/SLC8A1/GSTM2/DMD/CD19/UBASH3B/PRKD1/TRPC1/FKBP1B/XCL1/SRI/CACNA1C/LYN/CLIC2/AKAP6	17
BP	GO:0055117	regulation of cardiac muscle contraction	17|2417	67|14725	0.0398404	0.348278	ENSG00000145362/ENSG00000183072/ENSG00000183873/ENSG00000183023/ENSG00000213366/ENSG00000198947/ENSG00000116741/ENSG00000108961/ENSG00000182533/ENSG00000119782/ENSG00000046604/ENSG00000134755/ENSG00000184588/ENSG00000075142/ENSG00000151067/ENSG00000155962/ENSG00000053918	ANK2/NKX2-5/SCN5A/SLC8A1/GSTM2/DMD/RGS2/RANGRF/CAV3/FKBP1B/DSG2/DSC2/PDE4B/SRI/CACNA1C/CLIC2/KCNQ1	17
BP	GO:0098693	regulation of synaptic vesicle cycle	12|2417	43|14725	0.0399678	0.34885	ENSG00000170558/ENSG00000145335/ENSG00000169760/ENSG00000197959/ENSG00000196338/ENSG00000176406/ENSG00000188906/ENSG00000106976/ENSG00000105737/ENSG00000102081/ENSG00000079841/ENSG00000132718	CDH2/SNCA/NLGN1/DNM3/NLGN3/RIMS2/LRRK2/DNM1/GRIK5/FMR1/RIMS1/SYT11	12
BP	GO:2000147	positive regulation of cell motility	82|2417	416|14725	0.0403063	0.350828	ENSG00000162493/ENSG00000091136/ENSG00000019549/ENSG00000076706/ENSG00000114251/ENSG00000181104/ENSG00000037280/ENSG00000102755/ENSG00000138795/ENSG00000115232/ENSG00000162733/ENSG00000122691/ENSG00000138685/ENSG00000183023/ENSG00000103241/ENSG00000119630/ENSG00000198121/ENSG00000117707/ENSG00000075213/ENSG00000157404/ENSG00000101017/ENSG00000105137/ENSG00000118257/ENSG00000134954/ENSG00000165757…	PDPN/LAMB1/SNAI2/MCAM/WNT5A/F2R/FLT4/FLT1/LEF1/ITGA4/DDR2/TWIST1/FGF2/SLC8A1/FOXF1/PGF/LPAR1/PROX1/SEMA3A/KIT/CD40/SYDE1/NRP2/ETS1/JCAD/S1PR1/AKT3/INSM1/DOCK4/PAK1/ANGPT1/THBS4/PRKD1/MIR221/PLA2G7/ADGRA2/PAK3/ROR2/HDAC9/HAS2/IL12A/ARHGEF39/FER/CCBE1/HMOX1/DOCK7/SPARC/XCL1/FOXC2/SPRY2/SEMA6A/PDGFRA/SPOCK2/PTGS2/ITGA6/PDGFC/VEGFD/SWAP70/BAG4/C1QBP/ITGA5/EGFR/RUFY3/TMSB15B/MIA3/PDGFRB/MYLK/TAC4/ONEC…	82
BP	GO:0021782	glial cell development	21|2417	87|14725	0.0403193	0.350828	ENSG00000084207/ENSG00000050555/ENSG00000128602/ENSG00000184486/ENSG00000185483/ENSG00000198121/ENSG00000198947/ENSG00000134198/ENSG00000124920/ENSG00000125820/ENSG00000169071/ENSG00000132970/ENSG00000152784/ENSG00000185668/ENSG00000242689/ENSG00000146648/ENSG00000254087/ENSG00000172201/ENSG00000265763/ENSG00000108797/ENSG00000070785	GSTP1/LAMC3/SMO/POU3F2/ROR1/LPAR1/DMD/TSPAN2/MYRF/NKX2-2/ROR2/WASF3/PRDM8/POU3F1/CNTF/EGFR/LYN/ID4/ZNF488/CNTNAP1/EIF2B3	21
BP	GO:0045132	meiotic chromosome segregation	20|2417	82|14725	0.0404193	0.351154	ENSG00000133863/ENSG00000155816/ENSG00000100206/ENSG00000149311/ENSG00000162669/ENSG00000269964/ENSG00000147601/ENSG00000058804/ENSG00000020922/ENSG00000180336/ENSG00000057468/ENSG00000169679/ENSG00000131747/ENSG00000112742/ENSG00000160117/ENSG00000149636/ENSG00000175595/ENSG00000113810/ENSG00000134698/ENSG00000164611	TEX15/FMN2/DMC1/ATM/HFM1/MEI4/TERF1/NDC1/MRE11/MEIOC/MSH4/BUB1/TOP2A/TTK/ANKLE1/DSN1/ERCC4/SMC4/AGO4/PTTG1	20
BP	GO:0198738	cell-cell signaling by wnt	90|2417	461|14725	0.0408369	0.354235	ENSG00000170558/ENSG00000147257/ENSG00000162409/ENSG00000170689/ENSG00000162738/ENSG00000116729/ENSG00000135272/ENSG00000116141/ENSG00000131668/ENSG00000146122/ENSG00000125931/ENSG00000019549/ENSG00000114251/ENSG00000183072/ENSG00000103449/ENSG00000016082/ENSG00000087258/ENSG00000112837/ENSG00000138795/ENSG00000169554/ENSG00000154310/ENSG00000185483/ENSG00000058091/ENSG00000122870/ENSG00000081059…	CDH2/GPC3/PRKAA2/HOXB9/VANGL2/WLS/MDFIC/MARK1/BARX1/DAAM2/CITED1/SNAI2/WNT5A/NKX2-5/SALL1/ISL1/GNAO1/TBX18/LEF1/ZEB2/TNIK/ROR1/CDK14/BICC1/TCF7/PYGO1/NXN/DACT1/DLX5/DKK3/NKD1/TLE4/GNG2/PITX2/SFRP1/LGR5/LRP4/RBMS3/TRABD2B/SOSTDC1/ARL6/DACT3/GRK5/ROR2/RSPO4/RNF138/ANKRD6/GRB10/CAPRIN2/CTR9/AGO3/AP2A2/LRRK2/DISC1/CYLD/TRABD2A/FOXO1/PTPRO/FOXL1/ZBTB33/TMEM237/EDA/ASPM/DIXDC1/SIX3/NOG/FGF9/GLI1/PSMD10…	90
BP	GO:0030206	chondroitin sulfate biosynthetic process	8|2417	25|14725	0.0411736	0.356605	ENSG00000038427/ENSG00000111817/ENSG00000198108/ENSG00000122863/ENSG00000154080/ENSG00000116704/ENSG00000173546/ENSG00000169826	VCAN/DSE/CHSY3/CHST3/CHST9/SLC35D1/CSPG4/CSGALNACT2	8
BP	GO:0021587	cerebellum morphogenesis	10|2417	34|14725	0.0417265	0.359555	ENSG00000128602/ENSG00000074047/ENSG00000117707/ENSG00000135919/ENSG00000069667/ENSG00000116906/ENSG00000152208/ENSG00000102924/ENSG00000111087/ENSG00000135049	SMO/GLI2/PROX1/SERPINE2/RORA/GNPAT/GRID2/CBLN1/GLI1/AGTPBP1	10
BP	GO:0061384	heart trabecula morphogenesis	10|2417	34|14725	0.0417265	0.359555	ENSG00000164683/ENSG00000154734/ENSG00000183072/ENSG00000069702/ENSG00000173706/ENSG00000170989/ENSG00000182533/ENSG00000135766/ENSG00000183691/ENSG00000125686	HEY1/ADAMTS1/NKX2-5/TGFBR3/HEG1/S1PR1/CAV3/EGLN1/NOG/MED1	10
BP	GO:2000826	regulation of heart morphogenesis	10|2417	34|14725	0.0417265	0.359555	ENSG00000128602/ENSG00000016082/ENSG00000122691/ENSG00000054598/ENSG00000164107/ENSG00000104313/ENSG00000126778/ENSG00000176692/ENSG00000183691/ENSG00000154342	SMO/ISL1/TWIST1/FOXC1/HAND2/EYA1/SIX1/FOXC2/NOG/WNT3A	10
BP	GO:0060324	face development	13|2417	48|14725	0.041834	0.359555	ENSG00000184058/ENSG00000128918/ENSG00000114251/ENSG00000138795/ENSG00000120093/ENSG00000105880/ENSG00000109063/ENSG00000121005/ENSG00000087245/ENSG00000163132/ENSG00000134853/ENSG00000183691/ENSG00000198363	TBX1/ALDH1A2/WNT5A/LEF1/HOXB3/DLX5/MYH3/CRISPLD1/MMP2/MSX1/PDGFRA/NOG/ASPH	13
BP	GO:2000243	positive regulation of reproductive process	13|2417	48|14725	0.041834	0.359555	ENSG00000169860/ENSG00000114251/ENSG00000169946/ENSG00000184937/ENSG00000075213/ENSG00000105137/ENSG00000136160/ENSG00000163132/ENSG00000108561/ENSG00000180336/ENSG00000158806/ENSG00000136931/ENSG00000164256	P2RY1/WNT5A/ZFPM2/WT1/SEMA3A/SYDE1/EDNRB/MSX1/C1QBP/MEIOC/NPM2/NR5A1/PRDM9	13
BP	GO:0051052	regulation of DNA metabolic process	73|2417	367|14725	0.0425769	0.365381	ENSG00000147231/ENSG00000149948/ENSG00000152661/ENSG00000115355/ENSG00000147889/ENSG00000133863/ENSG00000074047/ENSG00000166313/ENSG00000122691/ENSG00000112319/ENSG00000065675/ENSG00000174010/ENSG00000276644/ENSG00000186280/ENSG00000104313/ENSG00000101017/ENSG00000097046/ENSG00000143799/ENSG00000138336/ENSG00000120868/ENSG00000149311/ENSG00000153162/ENSG00000207870/ENSG00000077264/ENSG00000101972…	CXorf57/HMGA2/GJA1/CCDC88A/CDKN2A/TEX15/GLI2/APBB1/TWIST1/EYA4/PRKCQ/KLHL15/DACH1/KDM4D/EYA1/CD40/CDC7/PARP1/TET1/APAF1/ATM/BMP6/MIR221/PAK3/STAG2/APLF/USP1/TNFSF4/RNF8/PDGFRA/DBF4B/TERF1/RFC5/PARM1/USP51/EYA3/PDGFC/RAD51AP1/MRE11/TIPIN/RPA2/GLI1/HNRNPU/DONSON/RFC4/ATAD5/NEK2/TCP1/HELB/MCIDAS/EGFR/BRCA1/CDC6/PDGFRB/DDX39B/DFFA/NPM2/NVL/HNRNPD/GNL3/SMC3/ERCC4/SMARCAD1/CHEK1/RGCC/BLM/SMC1A/SIRT1/US…	73
BP	GO:0009880	embryonic pattern specification	14|2417	53|14725	0.0432197	0.370332	ENSG00000125931/ENSG00000114251/ENSG00000184937/ENSG00000185920/ENSG00000075213/ENSG00000119042/ENSG00000203877/ENSG00000197121/ENSG00000109906/ENSG00000175879/ENSG00000164458/ENSG00000005102/ENSG00000154309/ENSG00000135111	CITED1/WNT5A/WT1/PTCH1/SEMA3A/SATB2/RIPPLY2/PGAP1/ZBTB16/HOXD8/TBXT/MEOX1/DISP1/TBX3	14
BP	GO:0007585	respiratory gaseous exchange	15|2417	58|14725	0.0442119	0.374854	ENSG00000106004/ENSG00000121297/ENSG00000037280/ENSG00000169760/ENSG00000276644/ENSG00000196338/ENSG00000101204/ENSG00000171388/ENSG00000183287/ENSG00000140718/ENSG00000172331/ENSG00000151617/ENSG00000166260/ENSG00000198743/ENSG00000175564	HOXA5/TSHZ3/FLT4/NLGN1/DACH1/NLGN3/CHRNA4/APLN/CCBE1/FTO/BPGM/EDNRA/COX11/SLC5A3/UCP3	15
BP	GO:0035773	insulin secretion involved in cellular response to glucose stimulus	15|2417	58|14725	0.0442119	0.374854	ENSG00000145242/ENSG00000139515/ENSG00000119782/ENSG00000174672/ENSG00000107560/ENSG00000147642/ENSG00000166263/ENSG00000185002/ENSG00000164038/ENSG00000135631/ENSG00000089685/ENSG00000075142/ENSG00000083720/ENSG00000118418/ENSG00000164182	EPHA5/PDX1/FKBP1B/BRSK2/RAB11FIP2/SYBU/STXBP4/RFX6/SLC9B2/RAB11FIP5/BIRC5/SRI/OXCT1/HMGN3/NDUFAF2	15
BP	GO:0003272	endocardial cushion formation	7|2417	21|14725	0.0444531	0.374854	ENSG00000019549/ENSG00000166341/ENSG00000166292/ENSG00000164532/ENSG00000163132/ENSG00000163909/ENSG00000183691	SNAI2/DCHS1/TMEM100/TBX20/MSX1/HEYL/NOG	7
BP	GO:0003416	endochondral bone growth	7|2417	21|14725	0.0444531	0.374854	ENSG00000072840/ENSG00000077092/ENSG00000162733/ENSG00000173068/ENSG00000188729/ENSG00000105664/ENSG00000196739	EVC/RARB/DDR2/BNC2/OSTN/COMP/COL27A1	7
BP	GO:0048643	positive regulation of skeletal muscle tissue development	7|2417	21|14725	0.0444531	0.374854	ENSG00000184058/ENSG00000081189/ENSG00000168779/ENSG00000064309/ENSG00000003137/ENSG00000129152/ENSG00000154342	TBX1/MEF2C/SHOX2/CDON/CYP26B1/MYOD1/WNT3A	7
BP	GO:0048846	axon extension involved in axon guidance	7|2417	21|14725	0.0444531	0.374854	ENSG00000114251/ENSG00000145147/ENSG00000075213/ENSG00000118257/ENSG00000076356/ENSG00000184347/ENSG00000154342	WNT5A/SLIT2/SEMA3A/NRP2/PLXNA2/SLIT3/WNT3A	7
BP	GO:0055022	negative regulation of cardiac muscle tissue growth	7|2417	21|14725	0.0444531	0.374854	ENSG00000152661/ENSG00000149269/ENSG00000078900/ENSG00000143995/ENSG00000182533/ENSG00000183691/ENSG00000151748	GJA1/PAK1/TP73/MEIS1/CAV3/NOG/SAV1	7
BP	GO:0061117	negative regulation of heart growth	7|2417	21|14725	0.0444531	0.374854	ENSG00000152661/ENSG00000149269/ENSG00000078900/ENSG00000143995/ENSG00000182533/ENSG00000183691/ENSG00000151748	GJA1/PAK1/TP73/MEIS1/CAV3/NOG/SAV1	7
BP	GO:1902284	neuron projection extension involved in neuron projection guidance	7|2417	21|14725	0.0444531	0.374854	ENSG00000114251/ENSG00000145147/ENSG00000075213/ENSG00000118257/ENSG00000076356/ENSG00000184347/ENSG00000154342	WNT5A/SLIT2/SEMA3A/NRP2/PLXNA2/SLIT3/WNT3A	7
BP	GO:1902667	regulation of axon guidance	7|2417	21|14725	0.0444531	0.374854	ENSG00000114251/ENSG00000145147/ENSG00000137285/ENSG00000075213/ENSG00000076356/ENSG00000151490/ENSG00000154342	WNT5A/SLIT2/TUBB2B/SEMA3A/PLXNA2/PTPRO/WNT3A	7
BP	GO:0046545	development of primary female sexual characteristics	22|2417	93|14725	0.0446819	0.374854	ENSG00000154734/ENSG00000185008/ENSG00000145147/ENSG00000169946/ENSG00000184937/ENSG00000078549/ENSG00000054598/ENSG00000276644/ENSG00000164093/ENSG00000157404/ENSG00000104332/ENSG00000102230/ENSG00000100206/ENSG00000162624/ENSG00000143355/ENSG00000149311/ENSG00000184347/ENSG00000126733/ENSG00000134853/ENSG00000057468/ENSG00000136931/ENSG00000096717	ADAMTS1/ROBO2/SLIT2/ZFPM2/WT1/ADCYAP1R1/FOXC1/DACH1/PITX2/KIT/SFRP1/PCYT1B/DMC1/LHX8/LHX9/ATM/SLIT3/DACH2/PDGFRA/MSH4/NR5A1/SIRT1	22
BP	GO:0000381	regulation of alternative mRNA splicing, via spliceosome	11|2417	39|14725	0.0447646	0.374854	ENSG00000154548/ENSG00000167281/ENSG00000185272/ENSG00000129152/ENSG00000102081/ENSG00000153187/ENSG00000076053/ENSG00000100201/ENSG00000101489/ENSG00000100320/ENSG00000162385	SRSF12/RBFOX3/RBM11/MYOD1/FMR1/HNRNPU/RBM7/DDX17/CELF4/RBFOX2/MAGOH	11
BP	GO:0003197	endocardial cushion development	11|2417	39|14725	0.0447646	0.374854	ENSG00000164683/ENSG00000019549/ENSG00000016082/ENSG00000122691/ENSG00000103241/ENSG00000166341/ENSG00000166292/ENSG00000164532/ENSG00000163132/ENSG00000163909/ENSG00000183691	HEY1/SNAI2/ISL1/TWIST1/FOXF1/DCHS1/TMEM100/TBX20/MSX1/HEYL/NOG	11
BP	GO:0045668	negative regulation of osteoblast differentiation	11|2417	39|14725	0.0447646	0.374854	ENSG00000125931/ENSG00000122691/ENSG00000233608/ENSG00000185920/ENSG00000164107/ENSG00000188729/ENSG00000104332/ENSG00000105996/ENSG00000266524/ENSG00000198963/ENSG00000183691	CITED1/TWIST1/TWIST2/PTCH1/HAND2/OSTN/SFRP1/HOXA2/GDF10/RORB/NOG	11
BP	GO:0030500	regulation of bone mineralization	16|2417	63|14725	0.0448811	0.374854	ENSG00000152661/ENSG00000138829/ENSG00000162733/ENSG00000122691/ENSG00000183023/ENSG00000046653/ENSG00000081189/ENSG00000170989/ENSG00000183688/ENSG00000162878/ENSG00000153162/ENSG00000183337/ENSG00000086712/ENSG00000114739/ENSG00000169884/ENSG00000143867	GJA1/FBN2/DDR2/TWIST1/SLC8A1/GPM6B/MEF2C/S1PR1/RFLNB/PKDCC/BMP6/BCOR/TXLNG/ACVR2B/WNT10B/OSR1	16
BP	GO:0045844	positive regulation of striated muscle tissue development	16|2417	63|14725	0.0448811	0.374854	ENSG00000152661/ENSG00000184058/ENSG00000069702/ENSG00000138685/ENSG00000169946/ENSG00000081189/ENSG00000168779/ENSG00000164532/ENSG00000064309/ENSG00000003137/ENSG00000129152/ENSG00000102678/ENSG00000111087/ENSG00000198563/ENSG00000154342/ENSG00000151320	GJA1/TBX1/TGFBR3/FGF2/ZFPM2/MEF2C/SHOX2/TBX20/CDON/CYP26B1/MYOD1/FGF9/GLI1/DDX39B/WNT3A/AKAP6	16
BP	GO:0048636	positive regulation of muscle organ development	16|2417	63|14725	0.0448811	0.374854	ENSG00000152661/ENSG00000184058/ENSG00000069702/ENSG00000138685/ENSG00000169946/ENSG00000081189/ENSG00000168779/ENSG00000164532/ENSG00000064309/ENSG00000003137/ENSG00000129152/ENSG00000102678/ENSG00000111087/ENSG00000198563/ENSG00000154342/ENSG00000151320	GJA1/TBX1/TGFBR3/FGF2/ZFPM2/MEF2C/SHOX2/TBX20/CDON/CYP26B1/MYOD1/FGF9/GLI1/DDX39B/WNT3A/AKAP6	16
BP	GO:0010522	regulation of calcium ion transport into cytosol	21|2417	88|14725	0.0450549	0.375191	ENSG00000145362/ENSG00000181104/ENSG00000010810/ENSG00000145335/ENSG00000183023/ENSG00000213366/ENSG00000078549/ENSG00000198947/ENSG00000138741/ENSG00000177455/ENSG00000154127/ENSG00000184304/ENSG00000144935/ENSG00000119782/ENSG00000143184/ENSG00000075142/ENSG00000151067/ENSG00000254087/ENSG00000010610/ENSG00000155962/ENSG00000151320	ANK2/F2R/FYN/SNCA/SLC8A1/GSTM2/ADCYAP1R1/DMD/TRPC3/CD19/UBASH3B/PRKD1/TRPC1/FKBP1B/XCL1/SRI/CACNA1C/LYN/CD4/CLIC2/AKAP6	21
BP	GO:0099173	postsynapse organization	21|2417	88|14725	0.0450549	0.375191	ENSG00000170558/ENSG00000114251/ENSG00000010810/ENSG00000169760/ENSG00000144868/ENSG00000111249/ENSG00000154928/ENSG00000198908/ENSG00000110076/ENSG00000197959/ENSG00000134569/ENSG00000196338/ENSG00000170396/ENSG00000077264/ENSG00000110888/ENSG00000188906/ENSG00000206561/ENSG00000175344/ENSG00000087053/ENSG00000161681/ENSG00000165917	CDH2/WNT5A/FYN/NLGN1/TMEM108/CUX2/EPHB1/BHLHB9/NRXN2/DNM3/LRP4/NLGN3/ZNF804A/PAK3/CAPRIN2/LRRK2/COLQ/CHRNA7/MTMR2/SHANK1/RAPSN	21
BP	GO:0000018	regulation of DNA recombination	17|2417	68|14725	0.0452846	0.376408	ENSG00000147231/ENSG00000133863/ENSG00000174010/ENSG00000101017/ENSG00000169621/ENSG00000117586/ENSG00000247746/ENSG00000111247/ENSG00000020922/ENSG00000117748/ENSG00000176208/ENSG00000127311/ENSG00000163104/ENSG00000149554/ENSG00000197299/ENSG00000164256/ENSG00000095002	CXorf57/TEX15/KLHL15/CD40/APLF/TNFSF4/USP51/RAD51AP1/MRE11/RPA2/ATAD5/HELB/SMARCAD1/CHEK1/BLM/PRDM9/MSH2	17
BP	GO:0000731	DNA synthesis involved in DNA repair	18|2417	73|14725	0.0454689	0.376408	ENSG00000130997/ENSG00000149311/ENSG00000174371/ENSG00000010072/ENSG00000143476/ENSG00000111445/ENSG00000111247/ENSG00000020922/ENSG00000117748/ENSG00000122008/ENSG00000163918/ENSG00000012048/ENSG00000101868/ENSG00000197299/ENSG00000096717/ENSG00000163743/ENSG00000138346/ENSG00000132383	POLN/ATM/EXO1/SPRTN/DTL/RFC5/RAD51AP1/MRE11/RPA2/POLK/RFC4/BRCA1/POLA1/BLM/SIRT1/RCHY1/DNA2/RPA1	18
BP	GO:0014896	muscle hypertrophy	18|2417	73|14725	0.0454689	0.376408	ENSG00000163884/ENSG00000164107/ENSG00000081189/ENSG00000116741/ENSG00000143799/ENSG00000138741/ENSG00000155657/ENSG00000154556/ENSG00000149269/ENSG00000182533/ENSG00000150907/ENSG00000196591/ENSG00000138379/ENSG00000160191/ENSG00000058668/ENSG00000198563/ENSG00000154229/ENSG00000151320	KLF15/HAND2/MEF2C/RGS2/PARP1/TRPC3/TTN/SORBS2/PAK1/CAV3/FOXO1/HDAC2/MSTN/PDE9A/ATP2B4/DDX39B/PRKCA/AKAP6	18
BP	GO:0048661	positive regulation of smooth muscle cell proliferation	18|2417	73|14725	0.0454689	0.376408	ENSG00000085662/ENSG00000138685/ENSG00000125257/ENSG00000087245/ENSG00000145604/ENSG00000170989/ENSG00000149269/ENSG00000064989/ENSG00000207870/ENSG00000100292/ENSG00000073756/ENSG00000007952/ENSG00000102678/ENSG00000146648/ENSG00000113721/ENSG00000198563/ENSG00000166831/ENSG00000177606	AKR1B1/FGF2/ABCC4/MMP2/SKP2/S1PR1/PAK1/CALCRL/MIR221/HMOX1/PTGS2/NOX1/FGF9/EGFR/PDGFRB/DDX39B/RBPMS2/JUN	18
BP	GO:0006260	DNA replication	57|2417	280|14725	0.045832	0.378855	ENSG00000115355/ENSG00000074047/ENSG00000130997/ENSG00000276644/ENSG00000097046/ENSG00000143799/ENSG00000149311/ENSG00000147536/ENSG00000164045/ENSG00000143751/ENSG00000153162/ENSG00000101972/ENSG00000174371/ENSG00000143476/ENSG00000125885/ENSG00000162521/ENSG00000134853/ENSG00000161692/ENSG00000147601/ENSG00000111445/ENSG00000145431/ENSG00000020922/ENSG00000092853/ENSG00000075131/ENSG00000117748…	CCDC88A/GLI2/POLN/DACH1/CDC7/PARP1/ATM/GINS4/CDC25A/SDE2/BMP6/STAG2/EXO1/DTL/MCM8/RBBP4/PDGFRA/DBF4B/TERF1/RFC5/PDGFC/MRE11/CLSPN/TIPIN/RPA2/POLK/GLI1/NASP/DONSON/ORC1/RFC4/HELB/MCIDAS/EGFR/ORC6/BRCA1/POLB/POLA1/CDC6/ETAA1/NPM2/MCM10/GINS3/CDC25C/SMC3/RRM1/CHEK1/MMS22L/BLM/SMC1A/SIRT1/JUN/CHAF1B/MGME1/DNA2/MCM9/RPA1	57
BP	GO:0010574	regulation of vascular endothelial growth factor production	9|2417	30|14725	0.0463066	0.380294	ENSG00000037280/ENSG00000016082/ENSG00000170425/ENSG00000069667/ENSG00000183287/ENSG00000073756/ENSG00000007952/ENSG00000012048/ENSG00000137573	FLT4/ISL1/ADORA2B/RORA/CCBE1/PTGS2/NOX1/BRCA1/SULF1	9
BP	GO:0060306	regulation of membrane repolarization	9|2417	30|14725	0.0463066	0.380294	ENSG00000152661/ENSG00000145362/ENSG00000183873/ENSG00000153956/ENSG00000118507/ENSG00000177098/ENSG00000182533/ENSG00000151320/ENSG00000053918	GJA1/ANK2/SCN5A/CACNA2D1/AKAP7/SCN4B/CAV3/AKAP6/KCNQ1	9
BP	GO:0090218	positive regulation of lipid kinase activity	9|2417	30|14725	0.0463066	0.380294	ENSG00000102755/ENSG00000138685/ENSG00000070886/ENSG00000157404/ENSG00000184304/ENSG00000097033/ENSG00000134853/ENSG00000113721/ENSG00000254087	FLT1/FGF2/EPHA8/KIT/PRKD1/SH3GLB1/PDGFRA/PDGFRB/LYN	9
BP	GO:0009743	response to carbohydrate	43|2417	204|14725	0.0463856	0.380294	ENSG00000152661/ENSG00000084207/ENSG00000158270/ENSG00000143195/ENSG00000163623/ENSG00000183023/ENSG00000166501/ENSG00000108984/ENSG00000132386/ENSG00000145242/ENSG00000123612/ENSG00000139515/ENSG00000075891/ENSG00000175445/ENSG00000125820/ENSG00000118965/ENSG00000064989/ENSG00000207870/ENSG00000113140/ENSG00000119782/ENSG00000174672/ENSG00000105737/ENSG00000073756/ENSG00000157103/ENSG00000023909…	GJA1/GSTP1/COLEC12/ILDR2/NKX6-1/SLC8A1/PRKCB/MAP2K6/SERPINF1/EPHA5/ACVR1C/PDX1/PAX2/LPL/NKX2-2/WDR35/CALCRL/MIR221/SPARC/FKBP1B/BRSK2/GRIK5/PTGS2/SLC6A1/GCLM/SARM1/RAB11FIP2/SYBU/SLC30A8/ACVR2B/STXBP4/RFX6/SLC9B2/RAB11FIP5/BIRC5/SRI/OXCT1/LYN/HMGN3/NDUFAF2/EIF2B3/GYS2/GPAM	43
BP	GO:0045444	fat cell differentiation	40|2417	188|14725	0.0468349	0.380294	ENSG00000149948/ENSG00000233276/ENSG00000151468/ENSG00000019549/ENSG00000114251/ENSG00000171488/ENSG00000112769/ENSG00000169946/ENSG00000005513/ENSG00000116741/ENSG00000104332/ENSG00000174705/ENSG00000138686/ENSG00000221818/ENSG00000113966/ENSG00000198873/ENSG00000069667/ENSG00000266524/ENSG00000147246/ENSG00000181004/ENSG00000150907/ENSG00000173145/ENSG00000073756/ENSG00000109906/ENSG00000091409…	HMGA2/GPX1/CCDC3/SNAI2/WNT5A/LRRC8C/LAMA4/ZFPM2/SOX8/RGS2/SFRP1/SH3PXD2B/BBS7/EBF2/ARL6/GRK5/RORA/GDF10/HTR2C/BBS12/FOXO1/NOC3L/PTGS2/ZBTB16/ITGA6/TPH1/GDF6/TRIB2/FTO/C1QL4/ZBTB7C/DLK2/WNT10B/SAV1/ID4/MED1/RUNX1T1/WNT3A/CCDC71L/SIRT1	40
BP	GO:0002067	glandular epithelial cell differentiation	12|2417	44|14725	0.0470349	0.380294	ENSG00000128602/ENSG00000106004/ENSG00000114251/ENSG00000077092/ENSG00000007372/ENSG00000163623/ENSG00000117707/ENSG00000139515/ENSG00000125820/ENSG00000173404/ENSG00000153162/ENSG00000185002	SMO/HOXA5/WNT5A/RARB/PAX6/NKX6-1/PROX1/PDX1/NKX2-2/INSM1/BMP6/RFX6	12
BP	GO:0010518	positive regulation of phospholipase activity	12|2417	44|14725	0.0470349	0.380294	ENSG00000102755/ENSG00000138685/ENSG00000198121/ENSG00000078549/ENSG00000157404/ENSG00000144891/ENSG00000134853/ENSG00000166148/ENSG00000171596/ENSG00000146648/ENSG00000113721/ENSG00000151617	FLT1/FGF2/LPAR1/ADCYAP1R1/KIT/AGTR1/PDGFRA/AVPR1A/NMUR1/EGFR/PDGFRB/EDNRA	12
BP	GO:0010611	regulation of cardiac muscle hypertrophy	12|2417	44|14725	0.0470349	0.380294	ENSG00000164107/ENSG00000116741/ENSG00000143799/ENSG00000138741/ENSG00000149269/ENSG00000182533/ENSG00000150907/ENSG00000160191/ENSG00000058668/ENSG00000198563/ENSG00000154229/ENSG00000151320	HAND2/RGS2/PARP1/TRPC3/PAK1/CAV3/FOXO1/PDE9A/ATP2B4/DDX39B/PRKCA/AKAP6	12
BP	GO:0048066	developmental pigmentation	12|2417	44|14725	0.0470349	0.380294	ENSG00000125931/ENSG00000138795/ENSG00000169554/ENSG00000173157/ENSG00000081189/ENSG00000157404/ENSG00000136160/ENSG00000104044/ENSG00000123892/ENSG00000139719/ENSG00000187098/ENSG00000164175	CITED1/LEF1/ZEB2/ADAMTS20/MEF2C/KIT/EDNRB/OCA2/RAB38/VPS33A/MITF/SLC45A2	12
BP	GO:0006044	N-acetylglucosamine metabolic process	6|2417	17|14725	0.0471149	0.380294	ENSG00000162694/ENSG00000175040/ENSG00000183196/ENSG00000159921/ENSG00000163281/ENSG00000140835	EXTL2/CHST2/CHST6/GNE/GNPDA2/CHST4	6
BP	GO:0019184	nonribosomal peptide biosynthetic process	6|2417	17|14725	0.0471149	0.380294	ENSG00000164039/ENSG00000143942/ENSG00000023909/ENSG00000131067/ENSG00000157426/ENSG00000085871	BDH2/CHAC2/GCLM/GGT7/AASDH/MGST2	6
BP	GO:0021533	cell differentiation in hindbrain	6|2417	17|14725	0.0471149	0.380294	ENSG00000117707/ENSG00000069667/ENSG00000152208/ENSG00000102924/ENSG00000183691/ENSG00000135049	PROX1/RORA/GRID2/CBLN1/NOG/AGTPBP1	6
BP	GO:0021854	hypothalamus development	6|2417	17|14725	0.0471149	0.380294	ENSG00000184486/ENSG00000138795/ENSG00000171956/ENSG00000075213/ENSG00000164093/ENSG00000134954	POU3F2/LEF1/FOXB1/SEMA3A/PITX2/ETS1	6
BP	GO:0060231	mesenchymal to epithelial transition	6|2417	17|14725	0.0471149	0.380294	ENSG00000128602/ENSG00000125931/ENSG00000103449/ENSG00000170577/ENSG00000184937/ENSG00000075891	SMO/CITED1/SALL1/SIX2/WT1/PAX2	6
BP	GO:0060644	mammary gland epithelial cell differentiation	6|2417	17|14725	0.0471149	0.380294	ENSG00000128602/ENSG00000106004/ENSG00000103241/ENSG00000185920/ENSG00000171956/ENSG00000213626	SMO/HOXA5/FOXF1/PTCH1/FOXB1/LBH	6
BP	GO:0072077	renal vesicle morphogenesis	6|2417	17|14725	0.0471149	0.380294	ENSG00000128602/ENSG00000125931/ENSG00000103449/ENSG00000170577/ENSG00000005513/ENSG00000075891	SMO/CITED1/SALL1/SIX2/SOX8/PAX2	6
BP	GO:0006275	regulation of DNA replication	25|2417	109|14725	0.0475321	0.380294	ENSG00000115355/ENSG00000074047/ENSG00000276644/ENSG00000097046/ENSG00000153162/ENSG00000101972/ENSG00000134853/ENSG00000161692/ENSG00000147601/ENSG00000111445/ENSG00000145431/ENSG00000020922/ENSG00000075131/ENSG00000111087/ENSG00000159147/ENSG00000163918/ENSG00000234602/ENSG00000146648/ENSG00000094804/ENSG00000158806/ENSG00000108055/ENSG00000197299/ENSG00000072501/ENSG00000177606/ENSG00000138346	CCDC88A/GLI2/DACH1/CDC7/BMP6/STAG2/PDGFRA/DBF4B/TERF1/RFC5/PDGFC/MRE11/TIPIN/GLI1/DONSON/RFC4/MCIDAS/EGFR/CDC6/NPM2/SMC3/BLM/SMC1A/JUN/DNA2	25
BP	GO:0001967	suckling behavior	5|2417	13|14725	0.0482161	0.380294	ENSG00000152192/ENSG00000164107/ENSG00000276644/ENSG00000122756/ENSG00000187821	POU4F1/HAND2/DACH1/CNTFR/HELT	5
BP	GO:0003352	regulation of cilium movement	5|2417	13|14725	0.0482161	0.380294	ENSG00000169126/ENSG00000154429/ENSG00000139537/ENSG00000105877/ENSG00000284862	ARMC4/CCSAP/CCDC65/DNAH11/CCDC39	5
BP	GO:0006553	lysine metabolic process	5|2417	13|14725	0.0482161	0.380294	ENSG00000008311/ENSG00000183032/ENSG00000149313/ENSG00000109576/ENSG00000188266	AASS/SLC25A21/AASDHPPT/AADAT/HYKK	5
BP	GO:0021535	cell migration in hindbrain	5|2417	13|14725	0.0482161	0.380294	ENSG00000152192/ENSG00000138795/ENSG00000076356/ENSG00000128881/ENSG00000100320	POU4F1/LEF1/PLXNA2/TTBK2/RBFOX2	5
BP	GO:0032769	negative regulation of monooxygenase activity	5|2417	13|14725	0.0482161	0.380294	ENSG00000145335/ENSG00000162676/ENSG00000182533/ENSG00000058668/ENSG00000102393	SNCA/GFI1/CAV3/ATP2B4/GLA	5
BP	GO:0033262	regulation of nuclear cell cycle DNA replication	5|2417	13|14725	0.0482161	0.380294	ENSG00000276644/ENSG00000097046/ENSG00000161692/ENSG00000147601/ENSG00000075131	DACH1/CDC7/DBF4B/TERF1/TIPIN	5
BP	GO:0035930	corticosteroid hormone secretion	5|2417	13|14725	0.0482161	0.380294	ENSG00000153162/ENSG00000069482/ENSG00000144891/ENSG00000173918/ENSG00000115138	BMP6/GAL/AGTR1/C1QTNF1/POMC	5
BP	GO:0043518	negative regulation of DNA damage response, signal transduction by p53 class mediator	5|2417	13|14725	0.0482161	0.380294	ENSG00000019549/ENSG00000122691/ENSG00000143479/ENSG00000101843/ENSG00000096717	SNAI2/TWIST1/DYRK3/PSMD10/SIRT1	5
BP	GO:0051446	positive regulation of meiotic cell cycle	5|2417	13|14725	0.0482161	0.380294	ENSG00000114251/ENSG00000163132/ENSG00000180336/ENSG00000158806/ENSG00000164256	WNT5A/MSX1/MEIOC/NPM2/PRDM9	5
BP	GO:0061029	eyelid development in camera-type eye	5|2417	13|14725	0.0482161	0.380294	ENSG00000122691/ENSG00000196591/ENSG00000146648/ENSG00000116478/ENSG00000177606	TWIST1/HDAC2/EGFR/HDAC1/JUN	5
BP	GO:0071625	vocalization behavior	5|2417	13|14725	0.0482161	0.380294	ENSG00000128573/ENSG00000110076/ENSG00000196338/ENSG00000021645/ENSG00000161681	FOXP2/NRXN2/NLGN3/NRXN3/SHANK1	5
BP	GO:0071732	cellular response to nitric oxide	5|2417	13|14725	0.0482161	0.380294	ENSG00000061918/ENSG00000116984/ENSG00000240583/ENSG00000150907/ENSG00000138668	GUCY1B1/MTR/AQP1/FOXO1/HNRNPD	5
BP	GO:0072425	signal transduction involved in G2 DNA damage checkpoint	5|2417	13|14725	0.0482161	0.380294	ENSG00000149311/ENSG00000143476/ENSG00000081377/ENSG00000012048/ENSG00000149554	ATM/DTL/CDC14B/BRCA1/CHEK1	5
BP	GO:1902358	sulfate transmembrane transport	5|2417	13|14725	0.0482161	0.380294	ENSG00000164707/ENSG00000155850/ENSG00000147606/ENSG00000091137/ENSG00000135502	SLC13A4/SLC26A2/SLC26A7/SLC26A4/SLC26A10	5
BP	GO:1902547	regulation of cellular response to vascular endothelial growth factor stimulus	5|2417	13|14725	0.0482161	0.380294	ENSG00000156140/ENSG00000196628/ENSG00000165757/ENSG00000020181/ENSG00000183287	ADAMTS3/TCF4/JCAD/ADGRA2/CCBE1	5
BP	GO:0045667	regulation of osteoblast differentiation	24|2417	104|14725	0.0482816	0.380294	ENSG00000152661/ENSG00000198732/ENSG00000138829/ENSG00000125931/ENSG00000019549/ENSG00000162733/ENSG00000122691/ENSG00000233608/ENSG00000185920/ENSG00000164107/ENSG00000081189/ENSG00000188729/ENSG00000104332/ENSG00000105996/ENSG00000153162/ENSG00000184304/ENSG00000101265/ENSG00000266524/ENSG00000198963/ENSG00000114739/ENSG00000183691/ENSG00000111087/ENSG00000169884/ENSG00000172201	GJA1/SMOC1/FBN2/CITED1/SNAI2/DDR2/TWIST1/TWIST2/PTCH1/HAND2/MEF2C/OSTN/SFRP1/HOXA2/BMP6/PRKD1/RASSF2/GDF10/RORB/ACVR2B/NOG/GLI1/WNT10B/ID4	24
BP	GO:2001257	regulation of cation channel activity	29|2417	130|14725	0.0483063	0.380294	ENSG00000145362/ENSG00000196730/ENSG00000182389/ENSG00000153956/ENSG00000169760/ENSG00000213366/ENSG00000077522/ENSG00000198947/ENSG00000081189/ENSG00000129159/ENSG00000118507/ENSG00000142408/ENSG00000196338/ENSG00000069482/ENSG00000165995/ENSG00000119782/ENSG00000166664/ENSG00000146729/ENSG00000171208/ENSG00000184588/ENSG00000102081/ENSG00000169282/ENSG00000144681/ENSG00000161681/ENSG00000075142…	ANK2/DAPK1/CACNB4/CACNA2D1/NLGN1/GSTM2/ACTN2/DMD/MEF2C/KCNC1/AKAP7/CACNG8/NLGN3/GAL/CACNB2/FKBP1B/CHRFAM7A/NIPSNAP2/NETO2/PDE4B/FMR1/KCNAB1/STAC/SHANK1/SRI/RASGRF1/ALG10B/CLIC2/AKAP6	29
BP	GO:0030335	positive regulation of cell migration	79|2417	403|14725	0.0484368	0.380788	ENSG00000162493/ENSG00000091136/ENSG00000019549/ENSG00000076706/ENSG00000114251/ENSG00000181104/ENSG00000037280/ENSG00000102755/ENSG00000138795/ENSG00000115232/ENSG00000162733/ENSG00000138685/ENSG00000183023/ENSG00000103241/ENSG00000119630/ENSG00000198121/ENSG00000117707/ENSG00000075213/ENSG00000157404/ENSG00000101017/ENSG00000105137/ENSG00000118257/ENSG00000134954/ENSG00000165757/ENSG00000170989…	PDPN/LAMB1/SNAI2/MCAM/WNT5A/F2R/FLT4/FLT1/LEF1/ITGA4/DDR2/FGF2/SLC8A1/FOXF1/PGF/LPAR1/PROX1/SEMA3A/KIT/CD40/SYDE1/NRP2/ETS1/JCAD/S1PR1/AKT3/INSM1/DOCK4/PAK1/ANGPT1/THBS4/PRKD1/MIR221/PLA2G7/ADGRA2/PAK3/ROR2/HDAC9/HAS2/IL12A/ARHGEF39/FER/CCBE1/HMOX1/DOCK7/SPARC/XCL1/FOXC2/SPRY2/SEMA6A/PDGFRA/PTGS2/ITGA6/PDGFC/VEGFD/SWAP70/BAG4/C1QBP/ITGA5/EGFR/RUFY3/TMSB15B/MIA3/PDGFRB/MYLK/ONECUT2/MIR10B/LYN/FOXO…	79
BP	GO:0003407	neural retina development	13|2417	49|14725	0.0486906	0.381183	ENSG00000005513/ENSG00000173482/ENSG00000115844/ENSG00000150625/ENSG00000113966/ENSG00000139445/ENSG00000069188/ENSG00000106025/ENSG00000198963/ENSG00000138083/ENSG00000058668/ENSG00000157890/ENSG00000095464	SOX8/PTPRM/DLX2/GPM6A/ARL6/FOXN4/SDK2/TSPAN12/RORB/SIX3/ATP2B4/MEGF11/PDE6C	13
BP	GO:0010171	body morphogenesis	13|2417	49|14725	0.0486906	0.381183	ENSG00000147257/ENSG00000184058/ENSG00000138795/ENSG00000105880/ENSG00000109063/ENSG00000121005/ENSG00000087245/ENSG00000064309/ENSG00000163132/ENSG00000162769/ENSG00000134853/ENSG00000183691/ENSG00000198363	GPC3/TBX1/LEF1/DLX5/MYH3/CRISPLD1/MMP2/CDON/MSX1/FLVCR1/PDGFRA/NOG/ASPH	13
BP	GO:2001259	positive regulation of cation channel activity	13|2417	49|14725	0.0486906	0.381183	ENSG00000145362/ENSG00000153956/ENSG00000213366/ENSG00000077522/ENSG00000129159/ENSG00000118507/ENSG00000196338/ENSG00000069482/ENSG00000165995/ENSG00000146729/ENSG00000144681/ENSG00000175548/ENSG00000151320	ANK2/CACNA2D1/GSTM2/ACTN2/KCNC1/AKAP7/NLGN3/GAL/CACNB2/NIPSNAP2/STAC/ALG10B/AKAP6	13
BP	GO:0006310	DNA recombination	50|2417	243|14725	0.0496123	0.387321	ENSG00000147231/ENSG00000133863/ENSG00000138795/ENSG00000130997/ENSG00000081059/ENSG00000174010/ENSG00000186280/ENSG00000101017/ENSG00000097046/ENSG00000143799/ENSG00000100206/ENSG00000149311/ENSG00000147536/ENSG00000162669/ENSG00000174371/ENSG00000156384/ENSG00000169621/ENSG00000134758/ENSG00000269964/ENSG00000166349/ENSG00000117586/ENSG00000125885/ENSG00000112130/ENSG00000247746/ENSG00000173559…	CXorf57/TEX15/LEF1/POLN/TCF7/KLHL15/KDM4D/CD40/CDC7/PARP1/DMC1/ATM/GINS4/HFM1/EXO1/SFR1/APLF/RNF138/MEI4/RAG1/TNFSF4/MCM8/RNF8/USP51/NABP1/RAD51AP1/XRCC4/MRE11/SWAP70/RPA2/ATAD5/HELB/MSH4/BRCA1/POLB/PRKDC/TOP2A/SFPQ/ERCC4/SMARCAD1/RAD54L/CHEK1/MMS22L/BLM/MND1/PRDM9/DNA2/MCM9/MSH2/RPA1	50
BP	GO:0010976	positive regulation of neuron projection development	50|2417	243|14725	0.0496123	0.387321	ENSG00000166313/ENSG00000277586/ENSG00000114251/ENSG00000010810/ENSG00000185008/ENSG00000169554/ENSG00000131711/ENSG00000171517/ENSG00000018236/ENSG00000169760/ENSG00000143858/ENSG00000145147/ENSG00000198121/ENSG00000153707/ENSG00000132386/ENSG00000173376/ENSG00000198947/ENSG00000137285/ENSG00000111249/ENSG00000168779/ENSG00000198908/ENSG00000163536/ENSG00000033122/ENSG00000149269/ENSG00000170396…	APBB1/NEFL/WNT5A/FYN/ROBO2/ZEB2/MAP1B/LPAR3/CNTN1/NLGN1/SYT2/SLIT2/LPAR1/PTPRD/SERPINF1/NDNF/DMD/TUBB2B/CUX2/SHOX2/BHLHB9/SERPINI1/LRRC7/PAK1/ZNF804A/LTK/PRKD1/MIR221/PAK3/RGMA/RIMS2/CAPRIN2/FKBP1B/P3H1/CAMK1/CNTF/NTRK2/SYT17/FMR1/ALKAL1/IL1RAP/RUFY3/NTRK1/SHANK1/PLXNC1/RIMS1/LYN/WNT3A/FEZ1/PRKN	50
BP	GO:0010517	regulation of phospholipase activity	14|2417	54|14725	0.0498527	0.388657	ENSG00000102755/ENSG00000145335/ENSG00000138685/ENSG00000198121/ENSG00000078549/ENSG00000116741/ENSG00000157404/ENSG00000144891/ENSG00000134853/ENSG00000166148/ENSG00000171596/ENSG00000146648/ENSG00000113721/ENSG00000151617	FLT1/SNCA/FGF2/LPAR1/ADCYAP1R1/RGS2/KIT/AGTR1/PDGFRA/AVPR1A/NMUR1/EGFR/PDGFRB/EDNRA	14
BP	GO:0010464	regulation of mesenchymal cell proliferation	10|2417	35|14725	0.050124	0.389153	ENSG00000184058/ENSG00000148516/ENSG00000128602/ENSG00000128573/ENSG00000114251/ENSG00000103241/ENSG00000168779/ENSG00000116132/ENSG00000126778/ENSG00000102678	TBX1/ZEB1/SMO/FOXP2/WNT5A/FOXF1/SHOX2/PRRX1/SIX1/FGF9	10
BP	GO:0043268	positive regulation of potassium ion transport	10|2417	35|14725	0.050124	0.389153	ENSG00000145362/ENSG00000022267/ENSG00000077522/ENSG00000129159/ENSG00000118507/ENSG00000129244/ENSG00000069482/ENSG00000175548/ENSG00000151320/ENSG00000053918	ANK2/FHL1/ACTN2/KCNC1/AKAP7/ATP1B2/GAL/ALG10B/AKAP6/KCNQ1	10
BP	GO:0045684	positive regulation of epidermis development	10|2417	35|14725	0.050124	0.389153	ENSG00000114251/ENSG00000185920/ENSG00000054598/ENSG00000117425/ENSG00000069482/ENSG00000172238/ENSG00000169884/ENSG00000099284/ENSG00000125686/ENSG00000179593	WNT5A/PTCH1/FOXC1/PTCH2/GAL/ATOH1/WNT10B/H2AFY2/MED1/ALOX15B	10
BP	GO:0051705	multi-organism behavior	15|2417	59|14725	0.0506167	0.391896	ENSG00000184058/ENSG00000152192/ENSG00000163064/ENSG00000108576/ENSG00000164107/ENSG00000276644/ENSG00000110076/ENSG00000182771/ENSG00000112333/ENSG00000196338/ENSG00000021645/ENSG00000122756/ENSG00000166148/ENSG00000187821/ENSG00000161681	TBX1/POU4F1/EN1/SLC6A4/HAND2/DACH1/NRXN2/GRID1/NR2E1/NLGN3/NRXN3/CNTFR/AVPR1A/HELT/SHANK1	15
BP	GO:0061515	myeloid cell development	15|2417	59|14725	0.0506167	0.391896	ENSG00000198945/ENSG00000110693/ENSG00000134198/ENSG00000157404/ENSG00000162367/ENSG00000143995/ENSG00000162769/ENSG00000151702/ENSG00000066405/ENSG00000164038/ENSG00000145220/ENSG00000172331/ENSG00000166147/ENSG00000125686/ENSG00000162722	L3MBTL3/SOX6/TSPAN2/KIT/TAL1/MEIS1/FLVCR1/FLI1/CLDN18/SLC9B2/LYAR/BPGM/FBN1/MED1/TRIM58	15
BP	GO:0007215	glutamate receptor signaling pathway	16|2417	64|14725	0.0510584	0.393198	ENSG00000196730/ENSG00000169760/ENSG00000260230/ENSG00000081189/ENSG00000182771/ENSG00000142408/ENSG00000196338/ENSG00000152208/ENSG00000105737/ENSG00000198785/ENSG00000171208/ENSG00000102081/ENSG00000161681/ENSG00000058335/ENSG00000152578/ENSG00000149403	DAPK1/NLGN1/FRRS1L/MEF2C/GRID1/CACNG8/NLGN3/GRID2/GRIK5/GRIN3A/NETO2/FMR1/SHANK1/RASGRF1/GRIA4/GRIK4	16
BP	GO:1901863	positive regulation of muscle tissue development	16|2417	64|14725	0.0510584	0.393198	ENSG00000152661/ENSG00000184058/ENSG00000069702/ENSG00000138685/ENSG00000169946/ENSG00000081189/ENSG00000168779/ENSG00000164532/ENSG00000064309/ENSG00000003137/ENSG00000129152/ENSG00000102678/ENSG00000111087/ENSG00000198563/ENSG00000154342/ENSG00000151320	GJA1/TBX1/TGFBR3/FGF2/ZFPM2/MEF2C/SHOX2/TBX20/CDON/CYP26B1/MYOD1/FGF9/GLI1/DDX39B/WNT3A/AKAP6	16
BP	GO:0001958	endochondral ossification	8|2417	26|14725	0.0512007	0.393198	ENSG00000197467/ENSG00000054598/ENSG00000105880/ENSG00000081189/ENSG00000139219/ENSG00000162551/ENSG00000153162/ENSG00000138386	COL13A1/FOXC1/DLX5/MEF2C/COL2A1/ALPL/BMP6/NAB1	8
BP	GO:0036075	replacement ossification	8|2417	26|14725	0.0512007	0.393198	ENSG00000197467/ENSG00000054598/ENSG00000105880/ENSG00000081189/ENSG00000139219/ENSG00000162551/ENSG00000153162/ENSG00000138386	COL13A1/FOXC1/DLX5/MEF2C/COL2A1/ALPL/BMP6/NAB1	8
BP	GO:0048596	embryonic camera-type eye morphogenesis	8|2417	26|14725	0.0512007	0.393198	ENSG00000148516/ENSG00000114251/ENSG00000137273/ENSG00000007372/ENSG00000122691/ENSG00000117707/ENSG00000075891/ENSG00000138083	ZEB1/WNT5A/FOXF2/PAX6/TWIST1/PROX1/PAX2/SIX3	8
BP	GO:0051149	positive regulation of muscle cell differentiation	18|2417	74|14725	0.0512046	0.393198	ENSG00000170558/ENSG00000184058/ENSG00000116761/ENSG00000117707/ENSG00000081189/ENSG00000157404/ENSG00000168779/ENSG00000064309/ENSG00000003137/ENSG00000182533/ENSG00000134072/ENSG00000129152/ENSG00000123562/ENSG00000144857/ENSG00000198563/ENSG00000154342/ENSG00000151320/ENSG00000096717	CDH2/TBX1/CTH/PROX1/MEF2C/KIT/SHOX2/CDON/CYP26B1/CAV3/CAMK1/MYOD1/MORF4L2/BOC/DDX39B/WNT3A/AKAP6/SIRT1	18
BP	GO:0043534	blood vessel endothelial cell migration	26|2417	115|14725	0.0513073	0.393449	ENSG00000233276/ENSG00000126016/ENSG00000138685/ENSG00000145147/ENSG00000081189/ENSG00000101017/ENSG00000134954/ENSG00000165757/ENSG00000117020/ENSG00000112333/ENSG00000154188/ENSG00000184304/ENSG00000207870/ENSG00000048052/ENSG00000100292/ENSG00000176692/ENSG00000073756/ENSG00000071246/ENSG00000137509/ENSG00000207744/ENSG00000154229/ENSG00000166025/ENSG00000102760/ENSG00000210741/ENSG00000096717…	GPX1/AMOT/FGF2/SLIT2/MEF2C/CD40/ETS1/JCAD/AKT3/NR2E1/ANGPT1/PRKD1/MIR221/HDAC9/HMOX1/FOXC2/PTGS2/VASH1/PRCP/MIR10B/PRKCA/AMOTL1/RGCC/MIR196A1/SIRT1/CSNK2B	26
BP	GO:0097553	calcium ion transmembrane import into cytosol	25|2417	110|14725	0.0522712	0.400295	ENSG00000145362/ENSG00000181104/ENSG00000010810/ENSG00000145335/ENSG00000153956/ENSG00000138685/ENSG00000183023/ENSG00000213366/ENSG00000198947/ENSG00000177455/ENSG00000154127/ENSG00000184304/ENSG00000196689/ENSG00000104321/ENSG00000100678/ENSG00000144935/ENSG00000147246/ENSG00000119782/ENSG00000143184/ENSG00000058668/ENSG00000075142/ENSG00000151067/ENSG00000254087/ENSG00000155962/ENSG00000151320	ANK2/F2R/FYN/SNCA/CACNA2D1/FGF2/SLC8A1/GSTM2/DMD/CD19/UBASH3B/PRKD1/TRPV1/TRPA1/SLC8A3/TRPC1/HTR2C/FKBP1B/XCL1/ATP2B4/SRI/CACNA1C/LYN/CLIC2/AKAP6	25
BP	GO:0040017	positive regulation of locomotion	86|2417	444|14725	0.0525233	0.401678	ENSG00000162493/ENSG00000091136/ENSG00000112276/ENSG00000019549/ENSG00000076706/ENSG00000114251/ENSG00000181104/ENSG00000037280/ENSG00000102755/ENSG00000138795/ENSG00000115232/ENSG00000162733/ENSG00000122691/ENSG00000138685/ENSG00000183023/ENSG00000103241/ENSG00000145147/ENSG00000119630/ENSG00000198121/ENSG00000117707/ENSG00000137285/ENSG00000075213/ENSG00000157404/ENSG00000101017/ENSG00000105137…	PDPN/LAMB1/BVES/SNAI2/MCAM/WNT5A/F2R/FLT4/FLT1/LEF1/ITGA4/DDR2/TWIST1/FGF2/SLC8A1/FOXF1/SLIT2/PGF/LPAR1/PROX1/TUBB2B/SEMA3A/KIT/CD40/SYDE1/NRP2/ETS1/JCAD/S1PR1/AKT3/INSM1/DOCK4/PAK1/ANGPT1/THBS4/PRKD1/MIR221/PLA2G7/ADGRA2/PAK3/ROR2/HDAC9/HAS2/IL12A/ARHGEF39/FER/CCBE1/HMOX1/DOCK7/SPARC/XCL1/FOXC2/SPRY2/SEMA6A/PDGFRA/SPOCK2/PTGS2/ITGA6/PDGFC/VEGFD/SWAP70/BAG4/C1QBP/ITGA5/EGFR/RUFY3/TMSB15B/MIA3/PDG…	86
BP	GO:0070838	divalent metal ion transport	76|2417	388|14725	0.0528003	0.402507	ENSG00000152661/ENSG00000145362/ENSG00000196632/ENSG00000181104/ENSG00000055732/ENSG00000010810/ENSG00000153898/ENSG00000087258/ENSG00000145335/ENSG00000182389/ENSG00000171517/ENSG00000148408/ENSG00000153956/ENSG00000138685/ENSG00000183023/ENSG00000166501/ENSG00000213366/ENSG00000107736/ENSG00000078549/ENSG00000155970/ENSG00000198947/ENSG00000138449/ENSG00000116329/ENSG00000140090/ENSG00000138741…	GJA1/ANK2/WNK3/F2R/MCOLN3/FYN/MCOLN2/GNAO1/SNCA/CACNB4/LPAR3/CACNA1B/CACNA2D1/FGF2/SLC8A1/PRKCB/GSTM2/CDH23/ADCYAP1R1/MICU3/DMD/SLC40A1/OPRD1/SLC24A4/TRPC3/RAMP2/CD19/UBASH3B/GPM6A/CACNA2D3/CACNG8/CALCRL/PRKD1/TRPV1/CHRNA4/TRPA1/SLC39A10/SLC30A4/CACNB2/CAV3/SLC35G1/SLC8A3/TRPC1/HTR2C/SLC30A10/FKBP1B/XCL1/SLC39A14/DENND5B/PTGS2/NPY/CHRNA7/NMUR1/GRIN3A/NIPSNAP2/PDE4B/SLC30A8/FMR1/SLC30A7/ATP2B4/MMG…	76
BP	GO:0003254	regulation of membrane depolarization	11|2417	40|14725	0.0529181	0.402507	ENSG00000152661/ENSG00000022267/ENSG00000183873/ENSG00000143799/ENSG00000213190/ENSG00000166257/ENSG00000108961/ENSG00000182533/ENSG00000188906/ENSG00000149575/ENSG00000023909	GJA1/FHL1/SCN5A/PARP1/MLLT11/SCN3B/RANGRF/CAV3/LRRK2/SCN2B/GCLM	11
BP	GO:0022602	ovulation cycle process	11|2417	40|14725	0.0529181	0.402507	ENSG00000154734/ENSG00000185008/ENSG00000145147/ENSG00000108984/ENSG00000184347/ENSG00000134853/ENSG00000175344/ENSG00000138379/ENSG00000136931/ENSG00000145730/ENSG00000096717	ADAMTS1/ROBO2/SLIT2/MAP2K6/SLIT3/PDGFRA/CHRNA7/MSTN/NR5A1/PAM/SIRT1	11
BP	GO:0045214	sarcomere organization	11|2417	40|14725	0.0529181	0.402507	ENSG00000183072/ENSG00000077522/ENSG00000117707/ENSG00000109063/ENSG00000081189/ENSG00000155657/ENSG00000036448/ENSG00000239474/ENSG00000182533/ENSG00000165410/ENSG00000134775	NKX2-5/ACTN2/PROX1/MYH3/MEF2C/TTN/MYOM2/KLHL41/CAV3/CFL2/FHOD3	11
BP	GO:0009581	detection of external stimulus	24|2417	105|14725	0.0532043	0.404137	ENSG00000010810/ENSG00000103241/ENSG00000118402/ENSG00000157404/ENSG00000154864/ENSG00000154928/ENSG00000138741/ENSG00000135919/ENSG00000155657/ENSG00000196689/ENSG00000104321/ENSG00000182533/ENSG00000180376/ENSG00000188107/ENSG00000170456/ENSG00000128617/ENSG00000198400/ENSG00000158683/ENSG00000111142/ENSG00000186862/ENSG00000152465/ENSG00000180245/ENSG00000095464/ENSG00000184014	FYN/FOXF1/ELOVL4/KIT/PIEZO2/EPHB1/TRPC3/SERPINE2/TTN/TRPV1/TRPA1/CAV3/CCDC66/EYS/DENND5B/OPN1SW/NTRK1/PKD1L1/METAP2/PDZD7/NMT2/RRH/PDE6C/DENND5A	24
BP	GO:0010634	positive regulation of epithelial cell migration	28|2417	126|14725	0.0538388	0.407854	ENSG00000114251/ENSG00000037280/ENSG00000138685/ENSG00000117707/ENSG00000101017/ENSG00000118257/ENSG00000134954/ENSG00000165757/ENSG00000117020/ENSG00000154188/ENSG00000184304/ENSG00000207870/ENSG00000020181/ENSG00000048052/ENSG00000170961/ENSG00000183287/ENSG00000100292/ENSG00000113140/ENSG00000176692/ENSG00000073756/ENSG00000207744/ENSG00000154229/ENSG00000166025/ENSG00000136960/ENSG00000150760…	WNT5A/FLT4/FGF2/PROX1/CD40/NRP2/ETS1/JCAD/AKT3/ANGPT1/PRKD1/MIR221/ADGRA2/HDAC9/HAS2/CCBE1/HMOX1/SPARC/FOXC2/PTGS2/MIR10B/PRKCA/AMOTL1/ENPP2/DOCK1/PLPP3/SIRT1/JUN	28
BP	GO:0060402	calcium ion transport into cytosol	28|2417	126|14725	0.0538388	0.407854	ENSG00000145362/ENSG00000181104/ENSG00000010810/ENSG00000145335/ENSG00000153956/ENSG00000138685/ENSG00000183023/ENSG00000213366/ENSG00000078549/ENSG00000198947/ENSG00000138741/ENSG00000177455/ENSG00000154127/ENSG00000184304/ENSG00000196689/ENSG00000104321/ENSG00000100678/ENSG00000144935/ENSG00000147246/ENSG00000119782/ENSG00000143184/ENSG00000058668/ENSG00000075142/ENSG00000151067/ENSG00000254087…	ANK2/F2R/FYN/SNCA/CACNA2D1/FGF2/SLC8A1/GSTM2/ADCYAP1R1/DMD/TRPC3/CD19/UBASH3B/PRKD1/TRPV1/TRPA1/SLC8A3/TRPC1/HTR2C/FKBP1B/XCL1/ATP2B4/SRI/CACNA1C/LYN/CD4/CLIC2/AKAP6	28
BP	GO:0007204	positive regulation of cytosolic calcium ion concentration	47|2417	228|14725	0.0540611	0.408987	ENSG00000152661/ENSG00000169860/ENSG00000145362/ENSG00000136425/ENSG00000181104/ENSG00000010810/ENSG00000145335/ENSG00000171517/ENSG00000153956/ENSG00000138685/ENSG00000183023/ENSG00000213366/ENSG00000198121/ENSG00000078549/ENSG00000198947/ENSG00000138193/ENSG00000136160/ENSG00000138741/ENSG00000177455/ENSG00000154127/ENSG00000170989/ENSG00000184304/ENSG00000196689/ENSG00000104321/ENSG00000144891…	GJA1/P2RY1/ANK2/CIB2/F2R/FYN/SNCA/LPAR3/CACNA2D1/FGF2/SLC8A1/GSTM2/LPAR1/ADCYAP1R1/DMD/PLCE1/EDNRB/TRPC3/CD19/UBASH3B/S1PR1/PRKD1/TRPV1/TRPA1/AGTR1/CAV3/SLC8A3/TRPC1/HTR2C/FKBP1B/XCL1/PDGFRA/C1QTNF1/AVPR1A/PROK2/SWAP70/UTS2R/NMU/ATP2B4/SRI/TAC4/CACNA1C/EDNRA/LYN/CD4/CLIC2/AKAP6	47
BP	GO:0098659	inorganic cation import across plasma membrane	12|2417	45|14725	0.054914	0.414325	ENSG00000010810/ENSG00000157214/ENSG00000153956/ENSG00000183023/ENSG00000198689/ENSG00000181804/ENSG00000196689/ENSG00000196950/ENSG00000100678/ENSG00000104635/ENSG00000135740/ENSG00000058668	FYN/STEAP2/CACNA2D1/SLC8A1/SLC9A6/SLC9A9/TRPV1/SLC39A10/SLC8A3/SLC39A14/SLC9A5/ATP2B4	12
BP	GO:0099587	inorganic ion import across plasma membrane	12|2417	45|14725	0.054914	0.414325	ENSG00000010810/ENSG00000157214/ENSG00000153956/ENSG00000183023/ENSG00000198689/ENSG00000181804/ENSG00000196689/ENSG00000196950/ENSG00000100678/ENSG00000104635/ENSG00000135740/ENSG00000058668	FYN/STEAP2/CACNA2D1/SLC8A1/SLC9A6/SLC9A9/TRPV1/SLC39A10/SLC8A3/SLC39A14/SLC9A5/ATP2B4	12
BP	GO:0051147	regulation of muscle cell differentiation	30|2417	137|14725	0.0559455	0.418478	ENSG00000170558/ENSG00000184058/ENSG00000148516/ENSG00000183072/ENSG00000103241/ENSG00000116761/ENSG00000110693/ENSG00000117707/ENSG00000081189/ENSG00000157404/ENSG00000168779/ENSG00000149269/ENSG00000064309/ENSG00000163132/ENSG00000207870/ENSG00000048052/ENSG00000003137/ENSG00000182533/ENSG00000160539/ENSG00000145794/ENSG00000134072/ENSG00000129152/ENSG00000123562/ENSG00000144857/ENSG00000198563…	CDH2/TBX1/ZEB1/NKX2-5/FOXF1/CTH/SOX6/PROX1/MEF2C/KIT/SHOX2/PAK1/CDON/MSX1/MIR221/HDAC9/CYP26B1/CAV3/PLPP7/MEGF10/CAMK1/MYOD1/MORF4L2/BOC/DDX39B/RBPMS2/FOXO4/WNT3A/AKAP6/SIRT1	30
BP	GO:0003156	regulation of animal organ formation	9|2417	31|14725	0.0560872	0.418478	ENSG00000005073/ENSG00000114251/ENSG00000016082/ENSG00000184937/ENSG00000164107/ENSG00000104313/ENSG00000126778/ENSG00000137573/ENSG00000154342	HOXA11/WNT5A/ISL1/WT1/HAND2/EYA1/SIX1/SULF1/WNT3A	9
BP	GO:0048536	spleen development	9|2417	31|14725	0.0560872	0.418478	ENSG00000131668/ENSG00000183072/ENSG00000182742/ENSG00000138449/ENSG00000164093/ENSG00000109705/ENSG00000162769/ENSG00000070501/ENSG00000253729	BARX1/NKX2-5/HOXB4/SLC40A1/PITX2/NKX3-2/FLVCR1/POLB/PRKDC	9
BP	GO:0060317	cardiac epithelial to mesenchymal transition	9|2417	31|14725	0.0560872	0.418478	ENSG00000164683/ENSG00000019549/ENSG00000069702/ENSG00000122691/ENSG00000166292/ENSG00000163132/ENSG00000163909/ENSG00000170961/ENSG00000183691	HEY1/SNAI2/TGFBR3/TWIST1/TMEM100/MSX1/HEYL/HAS2/NOG	9
BP	GO:0061437	renal system vasculature development	7|2417	22|14725	0.0562665	0.418478	ENSG00000184937/ENSG00000154188/ENSG00000176692/ENSG00000134853/ENSG00000174059/ENSG00000113721/ENSG00000143867	WT1/ANGPT1/FOXC2/PDGFRA/CD34/PDGFRB/OSR1	7
BP	GO:0061440	kidney vasculature development	7|2417	22|14725	0.0562665	0.418478	ENSG00000184937/ENSG00000154188/ENSG00000176692/ENSG00000134853/ENSG00000174059/ENSG00000113721/ENSG00000143867	WT1/ANGPT1/FOXC2/PDGFRA/CD34/PDGFRB/OSR1	7
BP	GO:0090344	negative regulation of cell aging	7|2417	22|14725	0.0562665	0.418478	ENSG00000149948/ENSG00000122691/ENSG00000117020/ENSG00000196660/ENSG00000189298/ENSG00000253729/ENSG00000096717	HMGA2/TWIST1/AKT3/SLC30A10/ZKSCAN3/PRKDC/SIRT1	7
BP	GO:0099623	regulation of cardiac muscle cell membrane repolarization	7|2417	22|14725	0.0562665	0.418478	ENSG00000152661/ENSG00000145362/ENSG00000183873/ENSG00000153956/ENSG00000177098/ENSG00000182533/ENSG00000053918	GJA1/ANK2/SCN5A/CACNA2D1/SCN4B/CAV3/KCNQ1	7
BP	GO:0060350	endochondral bone morphogenesis	13|2417	50|14725	0.0562834	0.418478	ENSG00000005073/ENSG00000077092/ENSG00000197467/ENSG00000054598/ENSG00000105880/ENSG00000081189/ENSG00000168779/ENSG00000139219/ENSG00000105664/ENSG00000162551/ENSG00000153162/ENSG00000138386/ENSG00000196739	HOXA11/RARB/COL13A1/FOXC1/DLX5/MEF2C/SHOX2/COL2A1/COMP/ALPL/BMP6/NAB1/COL27A1	13
BP	GO:0061971	replacement bone morphogenesis	13|2417	50|14725	0.0562834	0.418478	ENSG00000005073/ENSG00000077092/ENSG00000197467/ENSG00000054598/ENSG00000105880/ENSG00000081189/ENSG00000168779/ENSG00000139219/ENSG00000105664/ENSG00000162551/ENSG00000153162/ENSG00000138386/ENSG00000196739	HOXA11/RARB/COL13A1/FOXC1/DLX5/MEF2C/SHOX2/COL2A1/COMP/ALPL/BMP6/NAB1/COL27A1	13
BP	GO:0070527	platelet aggregation	13|2417	50|14725	0.0562834	0.418478	ENSG00000162493/ENSG00000065675/ENSG00000135919/ENSG00000154127/ENSG00000185532/ENSG00000134853/ENSG00000173918/ENSG00000035403/ENSG00000254087/ENSG00000185245/ENSG00000154229/ENSG00000154342/ENSG00000115956	PDPN/PRKCQ/SERPINE2/UBASH3B/PRKG1/PDGFRA/C1QTNF1/VCL/LYN/GP1BA/PRKCA/WNT3A/PLEK	13
BP	GO:0007631	feeding behavior	20|2417	85|14725	0.0563972	0.41877	ENSG00000154277/ENSG00000169860/ENSG00000152192/ENSG00000010810/ENSG00000116678/ENSG00000163064/ENSG00000164107/ENSG00000276644/ENSG00000116329/ENSG00000135324/ENSG00000197587/ENSG00000069482/ENSG00000171388/ENSG00000122756/ENSG00000147246/ENSG00000181004/ENSG00000122585/ENSG00000148053/ENSG00000187821/ENSG00000109255	UCHL1/P2RY1/POU4F1/FYN/LEPR/EN1/HAND2/DACH1/OPRD1/MRAP2/DMBX1/GAL/APLN/CNTFR/HTR2C/BBS12/NPY/NTRK2/HELT/NMU	20
BP	GO:0048844	artery morphogenesis	15|2417	60|14725	0.0576388	0.426338	ENSG00000164683/ENSG00000184058/ENSG00000105991/ENSG00000103241/ENSG00000054598/ENSG00000117707/ENSG00000164107/ENSG00000104313/ENSG00000117020/ENSG00000116132/ENSG00000126778/ENSG00000176692/ENSG00000183691/ENSG00000113721/ENSG00000065534	HEY1/TBX1/HOXA1/FOXF1/FOXC1/PROX1/HAND2/EYA1/AKT3/PRRX1/SIX1/FOXC2/NOG/PDGFRB/MYLK	15
BP	GO:0051702	interaction with symbiont	15|2417	60|14725	0.0576388	0.426338	ENSG00000149948/ENSG00000233276/ENSG00000138795/ENSG00000163661/ENSG00000207870/ENSG00000240583/ENSG00000102081/ENSG00000116478/ENSG00000047188/ENSG00000108055/ENSG00000160208/ENSG00000137947/ENSG00000165416/ENSG00000177606/ENSG00000185345	HMGA2/GPX1/LEF1/PTX3/MIR221/AQP1/FMR1/HDAC1/YTHDC2/SMC3/RRP1B/GTF2B/SUGT1/JUN/PRKN	15
BP	GO:0051100	negative regulation of binding	32|2417	148|14725	0.0576866	0.426338	ENSG00000149948/ENSG00000164683/ENSG00000169860/ENSG00000128602/ENSG00000016082/ENSG00000072832/ENSG00000138795/ENSG00000115232/ENSG00000165617/ENSG00000113196/ENSG00000164107/ENSG00000088756/ENSG00000163132/ENSG00000077254/ENSG00000244414/ENSG00000128881/ENSG00000182175/ENSG00000186951/ENSG00000162735/ENSG00000188906/ENSG00000095713/ENSG00000100292/ENSG00000162946/ENSG00000196591/ENSG00000148143…	HMGA2/HEY1/P2RY1/SMO/ISL1/CRMP1/LEF1/ITGA4/DACT1/HAND1/HAND2/ARHGAP28/MSX1/USP33/CFHR1/TTBK2/RGMA/PPARA/PEX19/LRRK2/CRTAC1/HMOX1/DISC1/HDAC2/ZNF462/CAMK1/NOG/NEK2/SRI/ERCC4/JUN/CTSZ	32
BP	GO:0003300	cardiac muscle hypertrophy	17|2417	70|14725	0.0577199	0.426338	ENSG00000163884/ENSG00000164107/ENSG00000081189/ENSG00000116741/ENSG00000143799/ENSG00000138741/ENSG00000155657/ENSG00000154556/ENSG00000149269/ENSG00000182533/ENSG00000150907/ENSG00000196591/ENSG00000160191/ENSG00000058668/ENSG00000198563/ENSG00000154229/ENSG00000151320	KLF15/HAND2/MEF2C/RGS2/PARP1/TRPC3/TTN/SORBS2/PAK1/CAV3/FOXO1/HDAC2/PDE9A/ATP2B4/DDX39B/PRKCA/AKAP6	17
BP	GO:0001649	osteoblast differentiation	40|2417	191|14725	0.0578415	0.426676	ENSG00000152661/ENSG00000198732/ENSG00000138829/ENSG00000128602/ENSG00000074047/ENSG00000038427/ENSG00000125931/ENSG00000019549/ENSG00000138795/ENSG00000162733/ENSG00000122691/ENSG00000233608/ENSG00000005513/ENSG00000185920/ENSG00000105880/ENSG00000164107/ENSG00000081189/ENSG00000188729/ENSG00000104332/ENSG00000168779/ENSG00000174705/ENSG00000119042/ENSG00000162551/ENSG00000105996/ENSG00000153162…	GJA1/SMOC1/FBN2/SMO/GLI2/VCAN/CITED1/SNAI2/LEF1/DDR2/TWIST1/TWIST2/SOX8/PTCH1/DLX5/HAND2/MEF2C/OSTN/SFRP1/SHOX2/SH3PXD2B/SATB2/ALPL/HOXA2/BMP6/PRKD1/RASSF2/COL6A1/GDF10/RORB/TNC/ACVR2B/NOG/FGF9/GLI1/HNRNPU/WNT10B/BCAP29/ID4/WNT3A	40
BP	GO:0048608	reproductive structure development	76|2417	390|14725	0.058106	0.428066	ENSG00000152661/ENSG00000164683/ENSG00000154734/ENSG00000253293/ENSG00000074047/ENSG00000159184/ENSG00000143869/ENSG00000005073/ENSG00000181690/ENSG00000128714/ENSG00000125931/ENSG00000114251/ENSG00000103449/ENSG00000165556/ENSG00000137273/ENSG00000138795/ENSG00000185008/ENSG00000145147/ENSG00000081059/ENSG00000169946/ENSG00000005513/ENSG00000184937/ENSG00000185920/ENSG00000132386/ENSG00000054598…	GJA1/HEY1/ADAMTS1/HOXA10/GLI2/HOXB13/GDF7/HOXA11/PLAG1/HOXD13/CITED1/WNT5A/SALL1/CDX2/FOXF2/LEF1/ROBO2/SLIT2/TCF7/ZFPM2/SOX8/WT1/PTCH1/SERPINF1/FOXC1/HAND1/SEMA3A/PITX2/KIT/SFRP1/PCYT1B/STOX2/MERTK/DMC1/SERPINE2/PLAC1/LHX8/ANKRD7/LHX9/ATM/NKX2-1/BMP6/ROR2/PTGIS/SLIT3/GCM1/VASH2/PDGFRA/PTGS2/EGLN1/TNC/ASPM/NOG/FGF9/GLI1/NASP/WDR19/EGFR/MSH4/VASH1/CBL/NTRK1/PDGFRB/FNDC3A/NR5A1/SULF1/OSR1/ID4/MED1/R…	76
BP	GO:0010212	response to ionizing radiation	31|2417	143|14725	0.0591697	0.435331	ENSG00000149948/ENSG00000233276/ENSG00000118971/ENSG00000019549/ENSG00000186280/ENSG00000104313/ENSG00000104332/ENSG00000143799/ENSG00000100206/ENSG00000048028/ENSG00000149311/ENSG00000078900/ENSG00000166130/ENSG00000112130/ENSG00000272047/ENSG00000158161/ENSG00000173559/ENSG00000111247/ENSG00000152422/ENSG00000012048/ENSG00000070501/ENSG00000110395/ENSG00000138075/ENSG00000253729/ENSG00000143493…	HMGA2/GPX1/CCND2/SNAI2/KDM4D/EYA1/SFRP1/PARP1/DMC1/USP28/ATM/TP73/IKBIP/RNF8/GTF2H5/EYA3/NABP1/RAD51AP1/XRCC4/BRCA1/POLB/CBL/ABCG5/PRKDC/INTS7/RPL26/RRM1/RAD54L/BLM/SIRT1/MSH2	31
BP	GO:0000413	protein peptidyl-prolyl isomerization	10|2417	36|14725	0.059576	0.436037	ENSG00000106080/ENSG00000079150/ENSG00000119782/ENSG00000171960/ENSG00000131013/ENSG00000153015/ENSG00000102309/ENSG00000113593/ENSG00000114857/ENSG00000198225	FKBP14/FKBP7/FKBP1B/PPIH/PPIL4/CWC27/PIN4/PPWD1/NKTR/FKBP1C	10
BP	GO:0001754	eye photoreceptor cell differentiation	10|2417	36|14725	0.059576	0.436037	ENSG00000007372/ENSG00000005513/ENSG00000140807/ENSG00000069188/ENSG00000198707/ENSG00000180376/ENSG00000198963/ENSG00000148053/ENSG00000135049/ENSG00000095464	PAX6/SOX8/NKD1/SDK2/CEP290/CCDC66/RORB/NTRK2/AGTPBP1/PDE6C	10
BP	GO:0006040	amino sugar metabolic process	10|2417	36|14725	0.059576	0.436037	ENSG00000162694/ENSG00000175040/ENSG00000183196/ENSG00000085465/ENSG00000159921/ENSG00000117143/ENSG00000135838/ENSG00000163281/ENSG00000140835/ENSG00000117151	EXTL2/CHST2/CHST6/OVGP1/GNE/UAP1/NPL/GNPDA2/CHST4/CTBS	10
BP	GO:0021575	hindbrain morphogenesis	10|2417	36|14725	0.059576	0.436037	ENSG00000128602/ENSG00000074047/ENSG00000117707/ENSG00000135919/ENSG00000069667/ENSG00000116906/ENSG00000152208/ENSG00000102924/ENSG00000111087/ENSG00000135049	SMO/GLI2/PROX1/SERPINE2/RORA/GNPAT/GRID2/CBLN1/GLI1/AGTPBP1	10
BP	GO:0007612	learning	27|2417	122|14725	0.060016	0.43826	ENSG00000128573/ENSG00000010810/ENSG00000114200/ENSG00000135298/ENSG00000163064/ENSG00000106236/ENSG00000171956/ENSG00000157404/ENSG00000154146/ENSG00000110076/ENSG00000196338/ENSG00000021645/ENSG00000166349/ENSG00000100678/ENSG00000073756/ENSG00000157103/ENSG00000175344/ENSG00000148053/ENSG00000134138/ENSG00000169220/ENSG00000161681/ENSG00000171532/ENSG00000078668/ENSG00000123360/ENSG00000177606…	FOXP2/FYN/BCHE/ADGRB3/EN1/NPTX2/FOXB1/KIT/NRGN/NRXN2/NLGN3/NRXN3/RAG1/SLC8A3/PTGS2/SLC6A1/CHRNA7/NTRK2/MEIS2/RGS14/SHANK1/NEUROD2/VDAC3/PDE1B/JUN/PRKN/SYNJ1	27
BP	GO:0015672	monovalent inorganic cation transport	86|2417	447|14725	0.0600356	0.43826	ENSG00000079215/ENSG00000089327/ENSG00000145362/ENSG00000072041/ENSG00000196632/ENSG00000022267/ENSG00000184185/ENSG00000183072/ENSG00000183873/ENSG00000185760/ENSG00000122691/ENSG00000183023/ENSG00000018236/ENSG00000164707/ENSG00000162687/ENSG00000077522/ENSG00000198689/ENSG00000116396/ENSG00000198947/ENSG00000145248/ENSG00000126562/ENSG00000080493/ENSG00000136531/ENSG00000140090/ENSG00000129159…	SLC1A3/FXYD5/ANK2/SLC6A15/WNK3/FHL1/KCNJ12/NKX2-5/SCN5A/KCNQ5/TWIST1/SLC8A1/CNTN1/SLC13A4/KCNT2/ACTN2/SLC9A6/KCNC4/DMD/SLC10A4/WNK4/SLC4A4/SCN2A/SLC24A4/KCNC1/KCNB2/AKAP7/CAPS2/SLC9A9/KLHL3/ATP1B2/SERPINE2/SCN4B/KCNQ2/KCNA3/SLC47A1/UTRN/SCN3B/FXYD6/PM20D1/KCNN1/SLC5A12/GAL/SLC13A5/GALNT8/SCN4A/RANGRF/KCNA2/SLC5A11/KCNG3/CAV3/SCN9A/SLC8A3/SLC2A13/SCN2B/ATP6AP1L/AQP1/SLC38A3/ABCC8/SCN3A/SLC2A12/NET…	86
BP	GO:0072511	divalent inorganic cation transport	76|2417	391|14725	0.0609035	0.441977	ENSG00000152661/ENSG00000145362/ENSG00000196632/ENSG00000181104/ENSG00000055732/ENSG00000010810/ENSG00000153898/ENSG00000087258/ENSG00000145335/ENSG00000182389/ENSG00000171517/ENSG00000148408/ENSG00000153956/ENSG00000138685/ENSG00000183023/ENSG00000166501/ENSG00000213366/ENSG00000107736/ENSG00000078549/ENSG00000155970/ENSG00000198947/ENSG00000138449/ENSG00000116329/ENSG00000140090/ENSG00000138741…	GJA1/ANK2/WNK3/F2R/MCOLN3/FYN/MCOLN2/GNAO1/SNCA/CACNB4/LPAR3/CACNA1B/CACNA2D1/FGF2/SLC8A1/PRKCB/GSTM2/CDH23/ADCYAP1R1/MICU3/DMD/SLC40A1/OPRD1/SLC24A4/TRPC3/RAMP2/CD19/UBASH3B/GPM6A/CACNA2D3/CACNG8/CALCRL/PRKD1/TRPV1/CHRNA4/TRPA1/SLC39A10/SLC30A4/CACNB2/CAV3/SLC35G1/SLC8A3/TRPC1/HTR2C/SLC30A10/FKBP1B/XCL1/SLC39A14/DENND5B/PTGS2/NPY/CHRNA7/NMUR1/GRIN3A/NIPSNAP2/PDE4B/SLC30A8/FMR1/SLC30A7/ATP2B4/MMG…	76
BP	GO:0003323	type B pancreatic cell development	6|2417	18|14725	0.0611738	0.441977	ENSG00000128602/ENSG00000114251/ENSG00000163623/ENSG00000125820/ENSG00000173404/ENSG00000153162	SMO/WNT5A/NKX6-1/NKX2-2/INSM1/BMP6	6
BP	GO:0006271	DNA strand elongation involved in DNA replication	6|2417	18|14725	0.0611738	0.441977	ENSG00000143799/ENSG00000147536/ENSG00000163918/ENSG00000101868/ENSG00000181938/ENSG00000138346	PARP1/GINS4/RFC4/POLA1/GINS3/DNA2	6
BP	GO:0034501	protein localization to kinetochore	6|2417	18|14725	0.0611738	0.441977	ENSG00000172167/ENSG00000040275/ENSG00000086827/ENSG00000177602/ENSG00000112742/ENSG00000137812	MTBP/SPDL1/ZW10/HASPIN/TTK/KNL1	6
BP	GO:0035813	regulation of renal sodium excretion	6|2417	18|14725	0.0611738	0.441977	ENSG00000134548/ENSG00000136160/ENSG00000145244/ENSG00000144891/ENSG00000166148/ENSG00000181408	SPX/EDNRB/CORIN/AGTR1/AVPR1A/UTS2R	6
BP	GO:0050849	negative regulation of calcium-mediated signaling	6|2417	18|14725	0.0611738	0.441977	ENSG00000213366/ENSG00000119782/ENSG00000058668/ENSG00000075142/ENSG00000155962/ENSG00000115956	GSTM2/FKBP1B/ATP2B4/SRI/CLIC2/PLEK	6
BP	GO:0050857	positive regulation of antigen receptor-mediated signaling pathway	6|2417	18|14725	0.0611738	0.441977	ENSG00000166501/ENSG00000140931/ENSG00000196950/ENSG00000083799/ENSG00000150637/ENSG00000254087	PRKCB/CMTM3/SLC39A10/CYLD/CD226/LYN	6
BP	GO:0097503	sialylation	6|2417	18|14725	0.0611738	0.441977	ENSG00000184005/ENSG00000101638/ENSG00000064225/ENSG00000157350/ENSG00000257524/ENSG00000160408	ST6GALNAC3/ST8SIA5/ST3GAL6/ST3GAL2/AL157935.2/ST6GALNAC6	6
BP	GO:0031103	axon regeneration	11|2417	41|14725	0.0620083	0.446857	ENSG00000166086/ENSG00000277586/ENSG00000016082/ENSG00000207870/ENSG00000182175/ENSG00000116984/ENSG00000228716/ENSG00000119782/ENSG00000242689/ENSG00000041982/ENSG00000177606	JAM3/NEFL/ISL1/MIR221/RGMA/MTR/DHFR/FKBP1B/CNTF/TNC/JUN	11
BP	GO:0090342	regulation of cell aging	11|2417	41|14725	0.0620083	0.446857	ENSG00000149948/ENSG00000147889/ENSG00000122691/ENSG00000081181/ENSG00000117020/ENSG00000196660/ENSG00000189298/ENSG00000071246/ENSG00000253729/ENSG00000114904/ENSG00000096717	HMGA2/CDKN2A/TWIST1/ARG2/AKT3/SLC30A10/ZKSCAN3/VASH1/PRKDC/NEK4/SIRT1	11
BP	GO:0010259	multicellular organism aging	8|2417	27|14725	0.0626733	0.449919	ENSG00000115112/ENSG00000141622/ENSG00000149311/ENSG00000188906/ENSG00000187821/ENSG00000136931/ENSG00000085999/ENSG00000095002	TFCP2L1/RNF165/ATM/LRRK2/HELT/NR5A1/RAD54L/MSH2	8
BP	GO:0010737	protein kinase A signaling	8|2417	27|14725	0.0626733	0.449919	ENSG00000131016/ENSG00000112541/ENSG00000118507/ENSG00000155657/ENSG00000069482/ENSG00000188906/ENSG00000111254/ENSG00000151320	AKAP12/PDE10A/AKAP7/TTN/GAL/LRRK2/AKAP3/AKAP6	8
BP	GO:0060441	epithelial tube branching involved in lung morphogenesis	8|2417	27|14725	0.0626733	0.449919	ENSG00000162738/ENSG00000106004/ENSG00000103241/ENSG00000136352/ENSG00000136158/ENSG00000041982/ENSG00000121039/ENSG00000101160	VANGL2/HOXA5/FOXF1/NKX2-1/SPRY2/TNC/RDH10/CTSZ	8
BP	GO:0006195	purine nucleotide catabolic process	12|2417	46|14725	0.0636339	0.450357	ENSG00000233276/ENSG00000196368/ENSG00000112541/ENSG00000116981/ENSG00000122824/ENSG00000135766/ENSG00000160191/ENSG00000165704/ENSG00000184588/ENSG00000113231/ENSG00000123360/ENSG00000101347	GPX1/NUDT11/PDE10A/NT5C1A/NUDT10/EGLN1/PDE9A/HPRT1/PDE4B/PDE8B/PDE1B/SAMHD1	12
BP	GO:0021695	cerebellar cortex development	12|2417	46|14725	0.0636339	0.450357	ENSG00000128602/ENSG00000074047/ENSG00000117707/ENSG00000133026/ENSG00000135919/ENSG00000128881/ENSG00000069667/ENSG00000152208/ENSG00000102924/ENSG00000111087/ENSG00000135049/ENSG00000171532	SMO/GLI2/PROX1/MYH10/SERPINE2/TTBK2/RORA/GRID2/CBLN1/GLI1/AGTPBP1/NEUROD2	12
BP	GO:0000226	microtubule cytoskeleton organization	90|2417	471|14725	0.063693	0.450357	ENSG00000101871/ENSG00000115355/ENSG00000169515/ENSG00000116141/ENSG00000277586/ENSG00000155816/ENSG00000127955/ENSG00000184368/ENSG00000072832/ENSG00000145335/ENSG00000131711/ENSG00000007372/ENSG00000159433/ENSG00000144451/ENSG00000166963/ENSG00000044459/ENSG00000169126/ENSG00000116741/ENSG00000160469/ENSG00000149269/ENSG00000129680/ENSG00000154429/ENSG00000077254/ENSG00000128881/ENSG00000101972…	MID1/CCDC88A/CCDC8/MARK1/NEFL/FMN2/GNAI1/MAP7D2/CRMP1/SNCA/MAP1B/PAX6/STARD9/SPAG16/MAP1A/CNTLN/ARMC4/RGS2/BRSK1/PAK1/MAP7D3/CCSAP/USP33/TTBK2/STAG2/SASS6/DNHD1/TUBE1/PIBF1/RANGRF/CDC14B/CAV3/KIZ/DCLK2/FER/CEP126/TUBB4A/NAV1/BORA/DOCK7/DISC1/SPRY2/SPDL1/CENPE/CEP97/KATNA1/ZW10/RSPH4A/CYLD/CEP135/MZT1/CEP57/KIF3A/BCCIP/KATNAL1/ASPM/DIXDC1/HOOK3/FBXO5/HNRNPU/SSX2IP/NEK2/MCIDAS/BRCA1/TRAF3IP1/LRGUK/…	90
BP	GO:0009582	detection of abiotic stimulus	24|2417	107|14725	0.0641063	0.450357	ENSG00000010810/ENSG00000118402/ENSG00000157404/ENSG00000154864/ENSG00000154928/ENSG00000138741/ENSG00000135919/ENSG00000155657/ENSG00000196689/ENSG00000104321/ENSG00000182533/ENSG00000056291/ENSG00000180376/ENSG00000188107/ENSG00000170456/ENSG00000128617/ENSG00000198400/ENSG00000158683/ENSG00000111142/ENSG00000186862/ENSG00000152465/ENSG00000180245/ENSG00000095464/ENSG00000184014	FYN/ELOVL4/KIT/PIEZO2/EPHB1/TRPC3/SERPINE2/TTN/TRPV1/TRPA1/CAV3/NPFFR2/CCDC66/EYS/DENND5B/OPN1SW/NTRK1/PKD1L1/METAP2/PDZD7/NMT2/RRH/PDE6C/DENND5A	24
BP	GO:0061178	regulation of insulin secretion involved in cellular response to glucose stimulus	13|2417	51|14725	0.0646375	0.450357	ENSG00000145242/ENSG00000139515/ENSG00000119782/ENSG00000174672/ENSG00000147642/ENSG00000166263/ENSG00000185002/ENSG00000164038/ENSG00000089685/ENSG00000075142/ENSG00000083720/ENSG00000118418/ENSG00000164182	EPHA5/PDX1/FKBP1B/BRSK2/SYBU/STXBP4/RFX6/SLC9B2/BIRC5/SRI/OXCT1/HMGN3/NDUFAF2	13
BP	GO:0014897	striated muscle hypertrophy	17|2417	71|14725	0.064746	0.450357	ENSG00000163884/ENSG00000164107/ENSG00000081189/ENSG00000116741/ENSG00000143799/ENSG00000138741/ENSG00000155657/ENSG00000154556/ENSG00000149269/ENSG00000182533/ENSG00000150907/ENSG00000196591/ENSG00000160191/ENSG00000058668/ENSG00000198563/ENSG00000154229/ENSG00000151320	KLF15/HAND2/MEF2C/RGS2/PARP1/TRPC3/TTN/SORBS2/PAK1/CAV3/FOXO1/HDAC2/PDE9A/ATP2B4/DDX39B/PRKCA/AKAP6	17
BP	GO:0030111	regulation of Wnt signaling pathway	62|2417	314|14725	0.0650342	0.450357	ENSG00000170558/ENSG00000147257/ENSG00000162738/ENSG00000116729/ENSG00000135272/ENSG00000131668/ENSG00000146122/ENSG00000125931/ENSG00000019549/ENSG00000114251/ENSG00000183072/ENSG00000103449/ENSG00000016082/ENSG00000112837/ENSG00000138795/ENSG00000169554/ENSG00000058091/ENSG00000122870/ENSG00000167693/ENSG00000165617/ENSG00000105880/ENSG00000050165/ENSG00000140807/ENSG00000104332/ENSG00000139292…	CDH2/GPC3/VANGL2/WLS/MDFIC/BARX1/DAAM2/CITED1/SNAI2/WNT5A/NKX2-5/SALL1/ISL1/TBX18/LEF1/ZEB2/CDK14/BICC1/NXN/DACT1/DLX5/DKK3/NKD1/SFRP1/LGR5/LRP4/RBMS3/TRABD2B/SOSTDC1/DACT3/ROR2/RSPO4/ANKRD6/GRB10/CAPRIN2/LRRK2/DISC1/CYLD/TRABD2A/FOXO1/PTPRO/FOXL1/TMEM237/EDA/ASPM/DIXDC1/SIX3/NOG/FGF9/GLI1/PSMD10/WNT10B/HECW1/HDAC1/SULF1/SOX7/WNT3A/USP47/PLPP3/MLLT3/DKK2/PRKN	62
BP	GO:0030279	negative regulation of ossification	16|2417	66|14725	0.06514	0.450357	ENSG00000125931/ENSG00000122691/ENSG00000233608/ENSG00000185920/ENSG00000164107/ENSG00000081189/ENSG00000188729/ENSG00000104332/ENSG00000134569/ENSG00000183688/ENSG00000105996/ENSG00000266524/ENSG00000198963/ENSG00000129167/ENSG00000183337/ENSG00000183691	CITED1/TWIST1/TWIST2/PTCH1/HAND2/MEF2C/OSTN/SFRP1/LRP4/RFLNB/HOXA2/GDF10/RORB/TPH1/BCOR/NOG	16
BP	GO:0002200	somatic diversification of immune receptors	14|2417	56|14725	0.0651572	0.450357	ENSG00000138795/ENSG00000081059/ENSG00000101017/ENSG00000149311/ENSG00000174371/ENSG00000169621/ENSG00000166349/ENSG00000117586/ENSG00000112130/ENSG00000133789/ENSG00000176208/ENSG00000070501/ENSG00000253729/ENSG00000095002	LEF1/TCF7/CD40/ATM/EXO1/APLF/RAG1/TNFSF4/RNF8/SWAP70/ATAD5/POLB/PRKDC/MSH2	14
BP	GO:0006809	nitric oxide biosynthetic process	14|2417	56|14725	0.0651572	0.450357	ENSG00000081181/ENSG00000007171/ENSG00000118965/ENSG00000163661/ENSG00000174130/ENSG00000196689/ENSG00000069667/ENSG00000124212/ENSG00000153904/ENSG00000073756/ENSG00000174059/ENSG00000058668/ENSG00000102393/ENSG00000213722	ARG2/NOS2/WDR35/PTX3/TLR6/TRPV1/RORA/PTGIS/DDAH1/PTGS2/CD34/ATP2B4/GLA/DDAH2	14
BP	GO:0030858	positive regulation of epithelial cell differentiation	14|2417	56|14725	0.0651572	0.450357	ENSG00000169554/ENSG00000007372/ENSG00000163623/ENSG00000185920/ENSG00000054598/ENSG00000075891/ENSG00000166292/ENSG00000117425/ENSG00000153162/ENSG00000172238/ENSG00000169884/ENSG00000099284/ENSG00000125686/ENSG00000179593	ZEB2/PAX6/NKX6-1/PTCH1/FOXC1/PAX2/TMEM100/PTCH2/BMP6/ATOH1/WNT10B/H2AFY2/MED1/ALOX15B	14
BP	GO:0051851	modification by host of symbiont morphology or physiology	14|2417	56|14725	0.0651572	0.450357	ENSG00000149948/ENSG00000138795/ENSG00000163661/ENSG00000207870/ENSG00000240583/ENSG00000102081/ENSG00000116478/ENSG00000047188/ENSG00000108055/ENSG00000160208/ENSG00000137947/ENSG00000165416/ENSG00000177606/ENSG00000185345	HMGA2/LEF1/PTX3/MIR221/AQP1/FMR1/HDAC1/YTHDC2/SMC3/RRP1B/GTF2B/SUGT1/JUN/PRKN	14
BP	GO:0008272	sulfate transport	5|2417	14|14725	0.065168	0.450357	ENSG00000164707/ENSG00000155850/ENSG00000147606/ENSG00000091137/ENSG00000135502	SLC13A4/SLC26A2/SLC26A7/SLC26A4/SLC26A10	5
BP	GO:0030828	positive regulation of cGMP biosynthetic process	5|2417	14|14725	0.065168	0.450357	ENSG00000007171/ENSG00000188729/ENSG00000152402/ENSG00000164116/ENSG00000170425	NOS2/OSTN/GUCY1A2/GUCY1A1/ADORA2B	5
BP	GO:0035855	megakaryocyte development	5|2417	14|14725	0.065168	0.450357	ENSG00000157404/ENSG00000162367/ENSG00000143995/ENSG00000151702/ENSG00000125686	KIT/TAL1/MEIS1/FLI1/MED1	5
BP	GO:0036445	neuronal stem cell division	5|2417	14|14725	0.065168	0.450357	ENSG00000138795/ENSG00000134532/ENSG00000116641/ENSG00000066279/ENSG00000154342	LEF1/SOX5/DOCK7/ASPM/WNT3A	5
BP	GO:0044331	cell-cell adhesion mediated by cadherin	5|2417	14|14725	0.065168	0.450357	ENSG00000170558/ENSG00000114251/ENSG00000151422/ENSG00000154342/ENSG00000102760	CDH2/WNT5A/FER/WNT3A/RGCC	5
BP	GO:0045717	negative regulation of fatty acid biosynthetic process	5|2417	14|14725	0.065168	0.450357	ENSG00000130208/ENSG00000083535/ENSG00000115361/ENSG00000012048/ENSG00000096717	APOC1/PIBF1/ACADL/BRCA1/SIRT1	5
BP	GO:0055057	neuroblast division	5|2417	14|14725	0.065168	0.450357	ENSG00000138795/ENSG00000134532/ENSG00000116641/ENSG00000066279/ENSG00000154342	LEF1/SOX5/DOCK7/ASPM/WNT3A	5
BP	GO:0060457	negative regulation of digestive system process	5|2417	14|14725	0.065168	0.450357	ENSG00000196632/ENSG00000126562/ENSG00000109255/ENSG00000138075/ENSG00000143921	WNK3/WNK4/NMU/ABCG5/ABCG8	5
BP	GO:0071599	otic vesicle development	5|2417	14|14725	0.065168	0.450357	ENSG00000117707/ENSG00000104313/ENSG00000139219/ENSG00000198707/ENSG00000126778	PROX1/EYA1/COL2A1/CEP290/SIX1	5
BP	GO:0072079	nephron tubule formation	5|2417	14|14725	0.065168	0.450357	ENSG00000005513/ENSG00000075891/ENSG00000126778/ENSG00000183691/ENSG00000143867	SOX8/PAX2/SIX1/NOG/OSR1	5
BP	GO:0072283	metanephric renal vesicle morphogenesis	5|2417	14|14725	0.065168	0.450357	ENSG00000128602/ENSG00000125931/ENSG00000103449/ENSG00000170577/ENSG00000075891	SMO/CITED1/SALL1/SIX2/PAX2	5
BP	GO:0090185	negative regulation of kidney development	5|2417	14|14725	0.065168	0.450357	ENSG00000125931/ENSG00000184937/ENSG00000075891/ENSG00000126778/ENSG00000143867	CITED1/WT1/PAX2/SIX1/OSR1	5
BP	GO:1904706	negative regulation of vascular smooth muscle cell proliferation	5|2417	14|14725	0.065168	0.450357	ENSG00000084207/ENSG00000081189/ENSG00000185532/ENSG00000171388/ENSG00000100292	GSTP1/MEF2C/PRKG1/APLN/HMOX1	5
BP	GO:2000831	regulation of steroid hormone secretion	5|2417	14|14725	0.065168	0.450357	ENSG00000153162/ENSG00000069482/ENSG00000144891/ENSG00000173918/ENSG00000115138	BMP6/GAL/AGTR1/C1QTNF1/POMC	5
BP	GO:2000241	regulation of reproductive process	27|2417	123|14725	0.065331	0.450357	ENSG00000169860/ENSG00000128714/ENSG00000114251/ENSG00000169946/ENSG00000184937/ENSG00000132386/ENSG00000075213/ENSG00000123612/ENSG00000104332/ENSG00000105137/ENSG00000136160/ENSG00000163132/ENSG00000085465/ENSG00000137270/ENSG00000066279/ENSG00000108561/ENSG00000112029/ENSG00000180336/ENSG00000112742/ENSG00000158806/ENSG00000136931/ENSG00000137573/ENSG00000142875/ENSG00000128040/ENSG00000183134…	P2RY1/HOXD13/WNT5A/ZFPM2/WT1/SERPINF1/SEMA3A/ACVR1C/SFRP1/SYDE1/EDNRB/MSX1/OVGP1/GCM1/ASPM/C1QBP/FBXO5/MEIOC/TTK/NPM2/NR5A1/SULF1/PRKACB/SPINK2/PTGDR2/PRDM9/MSH2	27
BP	GO:0008406	gonad development	40|2417	193|14725	0.0661567	0.450357	ENSG00000154734/ENSG00000253293/ENSG00000005073/ENSG00000114251/ENSG00000103449/ENSG00000185008/ENSG00000145147/ENSG00000169946/ENSG00000005513/ENSG00000184937/ENSG00000054598/ENSG00000075213/ENSG00000164093/ENSG00000157404/ENSG00000104332/ENSG00000102230/ENSG00000100206/ENSG00000162624/ENSG00000106013/ENSG00000143355/ENSG00000149311/ENSG00000136352/ENSG00000184347/ENSG00000134853/ENSG00000066279…	ADAMTS1/HOXA10/HOXA11/WNT5A/SALL1/ROBO2/SLIT2/ZFPM2/SOX8/WT1/FOXC1/SEMA3A/PITX2/KIT/SFRP1/PCYT1B/DMC1/LHX8/ANKRD7/LHX9/ATM/NKX2-1/SLIT3/PDGFRA/ASPM/FGF9/NASP/WDR19/MSH4/CBL/NTRK1/PDGFRB/FNDC3A/NR5A1/OSR1/RRM1/RDH10/SIRT1/AGO4/MSH2	40
BP	GO:0001840	neural plate development	4|2417	10|14725	0.0664198	0.450357	ENSG00000162738/ENSG00000185920/ENSG00000183691/ENSG00000164458	VANGL2/PTCH1/NOG/TBXT	4
BP	GO:0003211	cardiac ventricle formation	4|2417	10|14725	0.0664198	0.450357	ENSG00000183072/ENSG00000113196/ENSG00000164107/ENSG00000081189	NKX2-5/HAND1/HAND2/MEF2C	4
BP	GO:0003263	cardioblast proliferation	4|2417	10|14725	0.0664198	0.450357	ENSG00000016082/ENSG00000164107/ENSG00000104313/ENSG00000126778	ISL1/HAND2/EYA1/SIX1	4
BP	GO:0003264	regulation of cardioblast proliferation	4|2417	10|14725	0.0664198	0.450357	ENSG00000016082/ENSG00000164107/ENSG00000104313/ENSG00000126778	ISL1/HAND2/EYA1/SIX1	4
BP	GO:0003356	regulation of cilium beat frequency	4|2417	10|14725	0.0664198	0.450357	ENSG00000169126/ENSG00000154429/ENSG00000105877/ENSG00000284862	ARMC4/CCSAP/DNAH11/CCDC39	4
[truncated: 6,493 more rows]
