# Supplementary material for: A single cysteine residue in vimentin regulates long non-coding RNA XIST to suppress epithelial–mesenchymal transition and stemness in breast cancer
Source: eLife. 2025 Jul 21;14:RP104191. doi: 10.7554/eLife.104191 (PMC12279371; doi:10.7554/eLife.104191)
Supplement: Figure 3—figure supplement 1—source data 2. [file elife-104191-fig3-figsupp1-data2.xlsx]

## Sheet: Figure 3-figure supplement 1-so
Significantly upregulated cellular functions by GO pathway
Category	GOID	Description	GeneRatio	BgRatio	pvalue	padj	geneID	geneName	Count
BP	GO:0007389	pattern specification process	137|2417	385|14725	1.71178e-20	9.62191e-17	ENSG00000101871/ENSG00000152661/ENSG00000147257/ENSG00000170689/ENSG00000162738/ENSG00000116729/ENSG00000184058/ENSG00000148516/ENSG00000128602/ENSG00000253293/ENSG00000106004/ENSG00000074047/ENSG00000105997/ENSG00000005073/ENSG00000131668/ENSG00000146122/ENSG00000128714/ENSG00000128918/ENSG00000125931/ENSG00000052850/ENSG00000120068/ENSG00000114251/ENSG00000106006/ENSG00000183072/ENSG00000128710…	MID1/GJA1/GPC3/HOXB9/VANGL2/WLS/TBX1/ZEB1/SMO/HOXA10/HOXA5/GLI2/HOXA3/HOXA11/BARX1/DAAM2/HOXD13/ALDH1A2/CITED1/ALX4/HOXB8/WNT5A/HOXA6/NKX2-5/HOXD10/HOXB6/CDX2/ISL1/HOXD11/TBX18/LEF1/ZEB2/HOXB3/GPR161/PAX6/FOXG1/SIX2/BICC1/NKX6-1/FOXF1/PCSK5/DCHS1/HOXB4/HOXC10/EN1/WT1/ALX1/HOXD9/PTCH1/FOXC1/DLL3/FOXB1/INTU/HAND1/HAND2/NKD1/ARMC4/LBX1/PAX7/MEF2C/SEMA3A/PITX2/EYA1/TBC1D32/HOXB5/DMRTA2/SP8/SFRP1/DYNC…	137
BP	GO:0003002	regionalization	113|2417	300|14725	2.88717e-19	8.11439e-16	ENSG00000147257/ENSG00000170689/ENSG00000162738/ENSG00000116729/ENSG00000184058/ENSG00000128602/ENSG00000253293/ENSG00000106004/ENSG00000074047/ENSG00000105997/ENSG00000005073/ENSG00000131668/ENSG00000128714/ENSG00000128918/ENSG00000052850/ENSG00000120068/ENSG00000114251/ENSG00000106006/ENSG00000183072/ENSG00000128710/ENSG00000108511/ENSG00000165556/ENSG00000016082/ENSG00000128713/ENSG00000112837…	GPC3/HOXB9/VANGL2/WLS/TBX1/SMO/HOXA10/HOXA5/GLI2/HOXA3/HOXA11/BARX1/HOXD13/ALDH1A2/ALX4/HOXB8/WNT5A/HOXA6/NKX2-5/HOXD10/HOXB6/CDX2/ISL1/HOXD11/TBX18/LEF1/ZEB2/HOXB3/GPR161/PAX6/FOXG1/SIX2/NKX6-1/FOXF1/PCSK5/HOXB4/HOXC10/EN1/WT1/ALX1/HOXD9/PTCH1/FOXC1/DLL3/FOXB1/INTU/NKD1/PAX7/MEF2C/SEMA3A/PITX2/TBC1D32/HOXB5/DMRTA2/SP8/SFRP1/DYNC2H1/HOXC4/PAX2/PAX1/DLX2/EMX2/TBX20/LRP4/NKX2-2/HOXA7/CDON/ATM/NKX2-…	113
BP	GO:0009952	anterior/posterior pattern specification	75|2417	182|14725	1.16405e-15	2.18104e-12	ENSG00000147257/ENSG00000170689/ENSG00000162738/ENSG00000116729/ENSG00000184058/ENSG00000128602/ENSG00000253293/ENSG00000106004/ENSG00000074047/ENSG00000105997/ENSG00000005073/ENSG00000131668/ENSG00000128714/ENSG00000128918/ENSG00000052850/ENSG00000120068/ENSG00000114251/ENSG00000106006/ENSG00000128710/ENSG00000108511/ENSG00000165556/ENSG00000112837/ENSG00000138795/ENSG00000169554/ENSG00000120093…	GPC3/HOXB9/VANGL2/WLS/TBX1/SMO/HOXA10/HOXA5/GLI2/HOXA3/HOXA11/BARX1/HOXD13/ALDH1A2/ALX4/HOXB8/WNT5A/HOXA6/HOXD10/HOXB6/CDX2/TBX18/LEF1/ZEB2/HOXB3/PAX6/SIX2/FOXF1/PCSK5/HOXB4/HOXC10/EN1/WT1/ALX1/HOXD9/FOXC1/DLL3/FOXB1/NKD1/HOXB5/SFRP1/HOXC4/PAX1/EMX2/HOXA7/CDON/ATM/HOXA2/MSX1/HOXB2/PLXNA2/RIPPLY2/ROR2/OTX2/PGAP1/FOXC2/ZIC3/ZBTB16/TSHZ1/KIF3A/ACVR2B/SIX3/HOXD8/NOG/PRKDC/TBXT/HOXD3/SCMH1/OSR1/RNF2/W…	75
BP	GO:0048562	embryonic organ morphogenesis	95|2417	276|14725	1.41441e-13	1.9876e-10	ENSG00000152661/ENSG00000162738/ENSG00000138829/ENSG00000184058/ENSG00000148516/ENSG00000128602/ENSG00000106004/ENSG00000074047/ENSG00000105997/ENSG00000005073/ENSG00000052850/ENSG00000136630/ENSG00000120068/ENSG00000114251/ENSG00000106006/ENSG00000183072/ENSG00000128710/ENSG00000103449/ENSG00000108511/ENSG00000077092/ENSG00000137273/ENSG00000105991/ENSG00000120093/ENSG00000007372/ENSG00000122691…	GJA1/VANGL2/FBN2/TBX1/ZEB1/SMO/HOXA5/GLI2/HOXA3/HOXA11/ALX4/HLX/HOXB8/WNT5A/HOXA6/NKX2-5/HOXD10/SALL1/HOXB6/RARB/FOXF2/HOXA1/HOXB3/PAX6/TWIST1/FOXG1/SIX2/FOXF1/HOXB4/TCF7/DLX6/ALX1/HOXD9/MYO3A/DLX5/PROX1/USH1C/HAND1/HAND2/LBX1/MEF2C/PITX2/EYA1/HOXB5/ITGA8/HOXC4/PAX2/FOXE1/SHOX2/DLX2/BBS7/COL2A1/SOBP/TBX20/SATB2/PRRX1/MFAP2/HOXA7/NKX3-2/HOXA2/MSX1/HOXB2/ROR2/FOXN4/FLVCR1/CEP290/SIX1/FOXC2/SPRY2/ZI…	95
BP	GO:0007423	sensory organ development	140|2417	479|14725	7.48603e-13	8.41579e-10	ENSG00000152661/ENSG00000198732/ENSG00000162738/ENSG00000138829/ENSG00000184058/ENSG00000050555/ENSG00000148516/ENSG00000074047/ENSG00000128573/ENSG00000177707/ENSG00000128918/ENSG00000114251/ENSG00000055732/ENSG00000103449/ENSG00000187498/ENSG00000077092/ENSG00000137273/ENSG00000138795/ENSG00000169554/ENSG00000105991/ENSG00000153291/ENSG00000185483/ENSG00000007372/ENSG00000166402/ENSG00000122691…	GJA1/SMOC1/VANGL2/FBN2/TBX1/LAMC3/ZEB1/GLI2/FOXP2/NECTIN3/ALDH1A2/WNT5A/MCOLN3/SALL1/COL4A1/RARB/FOXF2/LEF1/ZEB2/HOXA1/SLC25A27/ROR1/PAX6/TUB/TWIST1/FOXG1/SIX2/MAF/DCHS1/DLX6/GSDME/SOX8/ESRRB/WT1/EYA4/CDH23/SERPINF1/FOXC1/MYO3A/DLX5/VAX1/PROX1/USH1C/BNC2/HAND2/COL5A2/NKD1/CECR2/PITX2/EYA1/TBC1D32/KIT/ITGA8/PTPRM/NPHP1/PAX2/LGR5/EPHB1/DLX2/SH3PXD2B/MERTK/CHRDL1/MYH10/BBS7/MAB21L1/COL2A1/SOBP/MYOM2…	140
BP	GO:0048736	appendage development	63|2417	165|14725	1.23672e-11	9.93088e-09	ENSG00000152661/ENSG00000147257/ENSG00000198732/ENSG00000138829/ENSG00000253293/ENSG00000074047/ENSG00000005073/ENSG00000128714/ENSG00000128918/ENSG00000052850/ENSG00000114251/ENSG00000128710/ENSG00000103449/ENSG00000077092/ENSG00000138795/ENSG00000122691/ENSG00000099139/ENSG00000180818/ENSG00000006377/ENSG00000163064/ENSG00000180318/ENSG00000128709/ENSG00000185920/ENSG00000105880/ENSG00000164066…	GJA1/GPC3/SMOC1/FBN2/HOXA10/GLI2/HOXA11/HOXD13/ALDH1A2/ALX4/WNT5A/HOXD10/SALL1/RARB/LEF1/TWIST1/PCSK5/HOXC10/DLX6/EN1/ALX1/HOXD9/PTCH1/DLX5/INTU/HAND2/MYH3/PITX2/TBC1D32/SP8/DYNC2H1/SHOX2/BBS7/COL2A1/RNF165/LRP4/RECK/PRRX1/COMP/SP9/MSX1/PLXNA2/RPGRIP1L/ROR2/RSPO4/CYP26B1/FLVCR1/HDAC2/ZBTB16/ITGA6/NOG/FGF9/WDR19/MED31/TRAF3IP1/HDAC1/OSR1/CACNA1C/PAM/MED1/RDH10/ASPH/TBX3	63
BP	GO:0060173	limb development	63|2417	165|14725	1.23672e-11	9.93088e-09	ENSG00000152661/ENSG00000147257/ENSG00000198732/ENSG00000138829/ENSG00000253293/ENSG00000074047/ENSG00000005073/ENSG00000128714/ENSG00000128918/ENSG00000052850/ENSG00000114251/ENSG00000128710/ENSG00000103449/ENSG00000077092/ENSG00000138795/ENSG00000122691/ENSG00000099139/ENSG00000180818/ENSG00000006377/ENSG00000163064/ENSG00000180318/ENSG00000128709/ENSG00000185920/ENSG00000105880/ENSG00000164066…	GJA1/GPC3/SMOC1/FBN2/HOXA10/GLI2/HOXA11/HOXD13/ALDH1A2/ALX4/WNT5A/HOXD10/SALL1/RARB/LEF1/TWIST1/PCSK5/HOXC10/DLX6/EN1/ALX1/HOXD9/PTCH1/DLX5/INTU/HAND2/MYH3/PITX2/TBC1D32/SP8/DYNC2H1/SHOX2/BBS7/COL2A1/RNF165/LRP4/RECK/PRRX1/COMP/SP9/MSX1/PLXNA2/RPGRIP1L/ROR2/RSPO4/CYP26B1/FLVCR1/HDAC2/ZBTB16/ITGA6/NOG/FGF9/WDR19/MED31/TRAF3IP1/HDAC1/OSR1/CACNA1C/PAM/MED1/RDH10/ASPH/TBX3	63
BP	GO:0035107	appendage morphogenesis	56|2417	140|14725	1.98438e-11	1.15184e-08	ENSG00000152661/ENSG00000147257/ENSG00000138829/ENSG00000253293/ENSG00000074047/ENSG00000005073/ENSG00000128714/ENSG00000128918/ENSG00000052850/ENSG00000114251/ENSG00000128710/ENSG00000103449/ENSG00000077092/ENSG00000138795/ENSG00000122691/ENSG00000099139/ENSG00000180818/ENSG00000006377/ENSG00000163064/ENSG00000180318/ENSG00000128709/ENSG00000185920/ENSG00000105880/ENSG00000164066/ENSG00000164107…	GJA1/GPC3/FBN2/HOXA10/GLI2/HOXA11/HOXD13/ALDH1A2/ALX4/WNT5A/HOXD10/SALL1/RARB/LEF1/TWIST1/PCSK5/HOXC10/DLX6/EN1/ALX1/HOXD9/PTCH1/DLX5/INTU/HAND2/MYH3/PITX2/TBC1D32/SP8/DYNC2H1/SHOX2/COL2A1/RNF165/LRP4/RECK/PRRX1/SP9/MSX1/PLXNA2/RPGRIP1L/ROR2/CYP26B1/FLVCR1/HDAC2/ZBTB16/NOG/FGF9/WDR19/TRAF3IP1/HDAC1/OSR1/CACNA1C/MED1/RDH10/ASPH/TBX3	56
BP	GO:0035108	limb morphogenesis	56|2417	140|14725	1.98438e-11	1.15184e-08	ENSG00000152661/ENSG00000147257/ENSG00000138829/ENSG00000253293/ENSG00000074047/ENSG00000005073/ENSG00000128714/ENSG00000128918/ENSG00000052850/ENSG00000114251/ENSG00000128710/ENSG00000103449/ENSG00000077092/ENSG00000138795/ENSG00000122691/ENSG00000099139/ENSG00000180818/ENSG00000006377/ENSG00000163064/ENSG00000180318/ENSG00000128709/ENSG00000185920/ENSG00000105880/ENSG00000164066/ENSG00000164107…	GJA1/GPC3/FBN2/HOXA10/GLI2/HOXA11/HOXD13/ALDH1A2/ALX4/WNT5A/HOXD10/SALL1/RARB/LEF1/TWIST1/PCSK5/HOXC10/DLX6/EN1/ALX1/HOXD9/PTCH1/DLX5/INTU/HAND2/MYH3/PITX2/TBC1D32/SP8/DYNC2H1/SHOX2/COL2A1/RNF165/LRP4/RECK/PRRX1/SP9/MSX1/PLXNA2/RPGRIP1L/ROR2/CYP26B1/FLVCR1/HDAC2/ZBTB16/NOG/FGF9/WDR19/TRAF3IP1/HDAC1/OSR1/CACNA1C/MED1/RDH10/ASPH/TBX3	56
BP	GO:0030326	embryonic limb morphogenesis	51|2417	122|14725	2.25409e-11	1.15184e-08	ENSG00000152661/ENSG00000147257/ENSG00000138829/ENSG00000253293/ENSG00000074047/ENSG00000005073/ENSG00000128714/ENSG00000128918/ENSG00000052850/ENSG00000114251/ENSG00000128710/ENSG00000103449/ENSG00000077092/ENSG00000138795/ENSG00000122691/ENSG00000180818/ENSG00000006377/ENSG00000163064/ENSG00000180318/ENSG00000128709/ENSG00000185920/ENSG00000105880/ENSG00000164066/ENSG00000164107/ENSG00000109063…	GJA1/GPC3/FBN2/HOXA10/GLI2/HOXA11/HOXD13/ALDH1A2/ALX4/WNT5A/HOXD10/SALL1/RARB/LEF1/TWIST1/HOXC10/DLX6/EN1/ALX1/HOXD9/PTCH1/DLX5/INTU/HAND2/MYH3/PITX2/TBC1D32/SP8/DYNC2H1/SHOX2/LRP4/RECK/PRRX1/SP9/MSX1/RPGRIP1L/ROR2/CYP26B1/FLVCR1/HDAC2/ZBTB16/NOG/FGF9/WDR19/TRAF3IP1/HDAC1/OSR1/CACNA1C/MED1/RDH10/TBX3	51
BP	GO:0035113	embryonic appendage morphogenesis	51|2417	122|14725	2.25409e-11	1.15184e-08	ENSG00000152661/ENSG00000147257/ENSG00000138829/ENSG00000253293/ENSG00000074047/ENSG00000005073/ENSG00000128714/ENSG00000128918/ENSG00000052850/ENSG00000114251/ENSG00000128710/ENSG00000103449/ENSG00000077092/ENSG00000138795/ENSG00000122691/ENSG00000180818/ENSG00000006377/ENSG00000163064/ENSG00000180318/ENSG00000128709/ENSG00000185920/ENSG00000105880/ENSG00000164066/ENSG00000164107/ENSG00000109063…	GJA1/GPC3/FBN2/HOXA10/GLI2/HOXA11/HOXD13/ALDH1A2/ALX4/WNT5A/HOXD10/SALL1/RARB/LEF1/TWIST1/HOXC10/DLX6/EN1/ALX1/HOXD9/PTCH1/DLX5/INTU/HAND2/MYH3/PITX2/TBC1D32/SP8/DYNC2H1/SHOX2/LRP4/RECK/PRRX1/SP9/MSX1/RPGRIP1L/ROR2/CYP26B1/FLVCR1/HDAC2/ZBTB16/NOG/FGF9/WDR19/TRAF3IP1/HDAC1/OSR1/CACNA1C/MED1/RDH10/TBX3	51
BP	GO:0045165	cell fate commitment	75|2417	217|14725	4.20343e-11	1.96896e-08	ENSG00000184058/ENSG00000128602/ENSG00000074047/ENSG00000143869/ENSG00000180447/ENSG00000162493/ENSG00000005073/ENSG00000184486/ENSG00000152192/ENSG00000114251/ENSG00000183072/ENSG00000128710/ENSG00000016082/ENSG00000007372/ENSG00000176165/ENSG00000170577/ENSG00000163623/ENSG00000138685/ENSG00000180818/ENSG00000205927/ENSG00000005513/ENSG00000184937/ENSG00000110693/ENSG00000185920/ENSG00000117707…	TBX1/SMO/GLI2/GDF7/GAS1/PDPN/HOXA11/POU3F2/POU4F1/WNT5A/NKX2-5/HOXD10/ISL1/PAX6/FOXG1/SIX2/NKX6-1/FGF2/HOXC10/OLIG2/SOX8/WT1/SOX6/PTCH1/PROX1/ZNF521/SOX5/LBX1/PAX7/MEF2C/EYA1/DMRTA2/SFRP1/PAX2/DLX2/SH3PXD2B/TAL1/BARHL2/PTCH2/NKX2-2/SATB2/PRRX1/CDON/NR2E1/NKX2-1/GAP43/HOXA2/SOSTDC1/EBF2/GBX1/RORA/ROR2/FOXN4/CYP26B1/CTR9/GCM1/OLIG1/DOCK7/SIX1/FOXC2/SPRY2/ISL2/POU6F2/CYLD/ATOH1/POU5F1/MYOD1/WNT10B/P…	75
BP	GO:0048568	embryonic organ development	117|2417	402|14725	8.05588e-11	3.48324e-08	ENSG00000152661/ENSG00000164683/ENSG00000162738/ENSG00000138829/ENSG00000184058/ENSG00000148516/ENSG00000128602/ENSG00000106004/ENSG00000074047/ENSG00000105997/ENSG00000005073/ENSG00000128918/ENSG00000125931/ENSG00000052850/ENSG00000136630/ENSG00000120068/ENSG00000114251/ENSG00000106006/ENSG00000183072/ENSG00000128710/ENSG00000103449/ENSG00000108511/ENSG00000165556/ENSG00000077092/ENSG00000137273…	GJA1/HEY1/VANGL2/FBN2/TBX1/ZEB1/SMO/HOXA5/GLI2/HOXA3/HOXA11/ALDH1A2/CITED1/ALX4/HLX/HOXB8/WNT5A/HOXA6/NKX2-5/HOXD10/SALL1/HOXB6/CDX2/RARB/FOXF2/LEF1/HOXA1/HOXB3/PAX6/TWIST1/FOXG1/SIX2/FOXF1/PCSK5/HOXB4/TCF7/DLX6/ZFPM2/EN1/ALX1/HOXD9/PTCH1/FOXC1/MYO3A/DLX5/PROX1/USH1C/HAND1/HAND2/LBX1/MEF2C/PITX2/EYA1/KIT/HOXB5/ITGA8/HOXC4/PAX2/FOXE1/SHOX2/DLX2/BBS7/COL2A1/SOBP/TAL1/TBX20/SATB2/PRRX1/MFAP2/HOXA7/N…	117
BP	GO:0001501	skeletal system development	128|2417	456|14725	1.46219e-10	5.87067e-08	ENSG00000102024/ENSG00000149948/ENSG00000170689/ENSG00000138829/ENSG00000184058/ENSG00000148516/ENSG00000253293/ENSG00000106004/ENSG00000074047/ENSG00000105997/ENSG00000005073/ENSG00000128714/ENSG00000038427/ENSG00000052850/ENSG00000019549/ENSG00000120068/ENSG00000114251/ENSG00000106006/ENSG00000128710/ENSG00000108511/ENSG00000072840/ENSG00000077092/ENSG00000105991/ENSG00000106031/ENSG00000120093…	PLS3/HMGA2/HOXB9/FBN2/TBX1/ZEB1/HOXA10/HOXA5/GLI2/HOXA3/HOXA11/HOXD13/VCAN/ALX4/SNAI2/HOXB8/WNT5A/HOXA6/HOXD10/HOXB6/EVC/RARB/HOXA1/HOXA13/HOXB3/TWIST1/SIX2/FGF2/MAF/PCSK5/DCHS1/HOXB4/COL13A1/HOXC10/DLX6/EN1/ALX1/HOXD9/SOX6/FOXC1/DLL3/DLX5/SOX5/HAND1/HAND2/COL5A2/-/PAX7/HAPLN3/MEF2C/PITX2/EYA1/KIT/HOXB5/SFRP1/HOXC4/PAX1/SHOX2/DLX2/SMAD9/MMP2/SH3PXD2B/LRRC17/COL2A1/TAL1/UNCX/SATB2/RFLNB/PRRX1/HOXA…	128
BP	GO:0001655	urogenital system development	92|2417	299|14725	3.75581e-10	1.40743e-07	ENSG00000085662/ENSG00000147257/ENSG00000162738/ENSG00000154734/ENSG00000116962/ENSG00000128602/ENSG00000074047/ENSG00000159184/ENSG00000005073/ENSG00000181690/ENSG00000128714/ENSG00000128918/ENSG00000125931/ENSG00000114251/ENSG00000103449/ENSG00000187498/ENSG00000077092/ENSG00000128713/ENSG00000112837/ENSG00000185008/ENSG00000170577/ENSG00000138685/ENSG00000103241/ENSG00000081181/ENSG00000099139…	AKR1B1/GPC3/VANGL2/ADAMTS1/NID1/SMO/GLI2/HOXB13/HOXA11/PLAG1/HOXD13/ALDH1A2/CITED1/WNT5A/SALL1/COL4A1/RARB/HOXD11/TBX18/ROBO2/SIX2/FGF2/FOXF1/ARG2/PCSK5/SLIT2/PGF/DCHS1/POU3F3/SOX8/PYGO1/WT1/KLF15/PTCH1/SERPINF1/FOXC1/FOXB1/PROX1/EPHA7/MME/MEF2C/EYA1/PLCE1/ITGA8/WNK4/SFRP1/PAX2/LGR5/SMAD9/KLHL3/EMX2/LRP4/ANGPT1/CA2/HEYL/BMP6/TP73/FAT4/GREB1L/RPGRIP1L/HAS2/AGTR1/C1GALT1/BMPER/LRRK2/CEP290/SIX1/FOX…	92
BP	GO:0072001	renal system development	83|2417	264|14725	8.61232e-10	3.02562e-07	ENSG00000085662/ENSG00000147257/ENSG00000162738/ENSG00000154734/ENSG00000116962/ENSG00000128602/ENSG00000074047/ENSG00000005073/ENSG00000128918/ENSG00000125931/ENSG00000114251/ENSG00000103449/ENSG00000187498/ENSG00000077092/ENSG00000128713/ENSG00000112837/ENSG00000185008/ENSG00000170577/ENSG00000138685/ENSG00000103241/ENSG00000081181/ENSG00000099139/ENSG00000145147/ENSG00000119630/ENSG00000166341…	AKR1B1/GPC3/VANGL2/ADAMTS1/NID1/SMO/GLI2/HOXA11/ALDH1A2/CITED1/WNT5A/SALL1/COL4A1/RARB/HOXD11/TBX18/ROBO2/SIX2/FGF2/FOXF1/ARG2/PCSK5/SLIT2/PGF/DCHS1/POU3F3/SOX8/PYGO1/WT1/KLF15/PTCH1/SERPINF1/FOXC1/PROX1/EPHA7/MME/MEF2C/EYA1/PLCE1/ITGA8/WNK4/SFRP1/PAX2/LGR5/SMAD9/KLHL3/EMX2/LRP4/ANGPT1/CA2/HEYL/BMP6/TP73/FAT4/GREB1L/RPGRIP1L/HAS2/AGTR1/C1GALT1/BMPER/LRRK2/CEP290/SIX1/FOXC2/PDGFRA/ODC1/CENPF/ZBTB1…	83
BP	GO:0007517	muscle organ development	100|2417	343|14725	1.74278e-09	5.76246e-07	ENSG00000152661/ENSG00000233276/ENSG00000162738/ENSG00000184058/ENSG00000128602/ENSG00000128573/ENSG00000112276/ENSG00000052850/ENSG00000136630/ENSG00000152192/ENSG00000022267/ENSG00000114251/ENSG00000183072/ENSG00000128710/ENSG00000069702/ENSG00000072840/ENSG00000016082/ENSG00000179456/ENSG00000138795/ENSG00000135903/ENSG00000122691/ENSG00000138685/ENSG00000169946/ENSG00000005513/ENSG00000184937…	GJA1/GPX1/VANGL2/TBX1/SMO/FOXP2/BVES/ALX4/HLX/POU4F1/FHL1/WNT5A/NKX2-5/HOXD10/TGFBR3/EVC/ISL1/ZBTB18/LEF1/PAX3/TWIST1/FGF2/ZFPM2/SOX8/WT1/HOXD9/SOX6/FOXC1/CAVIN4/VAX1/PROX1/HAND1/DMD/MYH3/LBX1/PAX7/MEF2C/MKX/HEG1/PITX2/DMRTA2/SHOX2/ETV1/EPHB1/VGLL2/MSC/TTN/S1PR1/TBX20/LAMA2/MYOM2/KLHL41/UTRN/MRAS/PAK1/TLL2/CDON/MYH15/COL19A1/MSX1/HEYL/TP73/MEIS1/HDAC9/CYP26B1/CAV3/CNTFR/ACTA1/SIX1/MEGF10/FOXC2/CE…	100
BP	GO:0048705	skeletal system morphogenesis	66|2417	196|14725	2.09816e-09	6.55208e-07	ENSG00000138829/ENSG00000184058/ENSG00000148516/ENSG00000106004/ENSG00000105997/ENSG00000005073/ENSG00000052850/ENSG00000120068/ENSG00000106006/ENSG00000128710/ENSG00000108511/ENSG00000077092/ENSG00000105991/ENSG00000120093/ENSG00000122691/ENSG00000170577/ENSG00000182742/ENSG00000197467/ENSG00000180318/ENSG00000128709/ENSG00000054598/ENSG00000105880/ENSG00000081189/ENSG00000104313/ENSG00000120075…	FBN2/TBX1/ZEB1/HOXA5/HOXA3/HOXA11/ALX4/HOXB8/HOXA6/HOXD10/HOXB6/RARB/HOXA1/HOXB3/TWIST1/SIX2/HOXB4/COL13A1/ALX1/HOXD9/FOXC1/DLX5/MEF2C/EYA1/HOXB5/SFRP1/PAX1/SHOX2/DLX2/MMP2/SH3PXD2B/COL2A1/UNCX/SATB2/RFLNB/PRRX1/HOXA7/NKX3-2/COMP/ALPL/HOXA2/MSX1/BMP6/HOXB2/RIPPLY2/ROR2/HAS2/CYP26B1/FLVCR1/NAB1/SIX1/FOXC2/PPARGC1B/PDGFRA/ACVR2B/COL27A1/HOXD8/NOG/WDR19/WNT10B/TBXT/HOXD3/RAB23/OSR1/FOXN3/RDH10	66
BP	GO:0048706	embryonic skeletal system development	46|2417	119|14725	4.48321e-09	1.32632e-06	ENSG00000170689/ENSG00000184058/ENSG00000148516/ENSG00000106004/ENSG00000105997/ENSG00000005073/ENSG00000052850/ENSG00000120068/ENSG00000114251/ENSG00000106006/ENSG00000128710/ENSG00000108511/ENSG00000105991/ENSG00000120093/ENSG00000122691/ENSG00000170577/ENSG00000099139/ENSG00000182742/ENSG00000180318/ENSG00000128709/ENSG00000009709/ENSG00000081189/ENSG00000104313/ENSG00000120075/ENSG00000168779…	HOXB9/TBX1/ZEB1/HOXA5/HOXA3/HOXA11/ALX4/HOXB8/WNT5A/HOXA6/HOXD10/HOXB6/HOXA1/HOXB3/TWIST1/SIX2/PCSK5/HOXB4/ALX1/HOXD9/PAX7/MEF2C/EYA1/HOXB5/SHOX2/DLX2/COL2A1/SATB2/PRRX1/HOXA7/NKX3-2/HOXA2/HOXB2/FLVCR1/SIX1/FOXC2/PDGFRA/SLC35D1/NOG/FGF9/WDR19/TBXT/HOXD3/SULF1/OSR1/RDH10	46
BP	GO:0090596	sensory organ morphogenesis	74|2417	234|14725	5.28978e-09	1.48669e-06	ENSG00000162738/ENSG00000138829/ENSG00000184058/ENSG00000148516/ENSG00000074047/ENSG00000177707/ENSG00000114251/ENSG00000103449/ENSG00000077092/ENSG00000137273/ENSG00000105991/ENSG00000007372/ENSG00000122691/ENSG00000176165/ENSG00000170577/ENSG00000006377/ENSG00000005513/ENSG00000095777/ENSG00000105880/ENSG00000117707/ENSG00000006611/ENSG00000204262/ENSG00000140807/ENSG00000164093/ENSG00000104313…	VANGL2/FBN2/TBX1/ZEB1/GLI2/NECTIN3/WNT5A/SALL1/RARB/FOXF2/HOXA1/PAX6/TWIST1/FOXG1/SIX2/DLX6/SOX8/MYO3A/DLX5/PROX1/USH1C/COL5A2/NKD1/PITX2/EYA1/ITGA8/PTPRM/PAX2/EPHB1/COL2A1/SOBP/PRRX1/MFAP2/CDON/NKX3-2/HOXA2/MSX1/ARL6/PITX3/MEIS1/ROR2/FOXN4/CYP26B1/SDK2/TSPAN12/CEP290/SIX1/SPRY2/CCDC66/RORB/HDAC2/ATOH1/TSHZ1/TSHR/CNTF/NTRK2/SIX3/NOG/FGF9/WDR19/AGTPBP1/HDAC1/TMIE/OSR1/FBN1/HMX2/HMX3/PDZD7/WNT3A/ME…	74
BP	GO:0007224	smoothened signaling pathway	47|2417	125|14725	8.68356e-09	2.29438e-06	ENSG00000147257/ENSG00000109113/ENSG00000128602/ENSG00000074047/ENSG00000180447/ENSG00000134874/ENSG00000072840/ENSG00000143147/ENSG00000007372/ENSG00000163623/ENSG00000103241/ENSG00000185920/ENSG00000164066/ENSG00000146350/ENSG00000104332/ENSG00000187240/ENSG00000168779/ENSG00000138686/ENSG00000135919/ENSG00000117425/ENSG00000125820/ENSG00000116132/ENSG00000064309/ENSG00000113966/ENSG00000128881…	GPC3/RAB34/SMO/GLI2/GAS1/DZIP1/EVC/GPR161/PAX6/NKX6-1/FOXF1/PTCH1/INTU/TBC1D32/SFRP1/DYNC2H1/SHOX2/BBS7/SERPINE2/PTCH2/NKX2-2/PRRX1/CDON/ARL6/TTBK2/RPGRIP1L/RORA/ROR2/OTX2/SCUBE1/KCTD6/SCUBE3/ANKMY2/KIF3A/HSPB11/FGF9/GLI1/WDR19/BOC/TRAF3IP1/WNT10B/TCTN2/KIF7/PRKACB/KIAA0586/DISP2/DISP1	47
BP	GO:0055123	digestive system development	48|2417	129|14725	8.97995e-09	2.29438e-06	ENSG00000162738/ENSG00000116729/ENSG00000128602/ENSG00000106004/ENSG00000074047/ENSG00000131668/ENSG00000128714/ENSG00000128918/ENSG00000052850/ENSG00000136630/ENSG00000114251/ENSG00000103449/ENSG00000165556/ENSG00000077092/ENSG00000137273/ENSG00000170577/ENSG00000103241/ENSG00000099139/ENSG00000166341/ENSG00000081059/ENSG00000165617/ENSG00000164093/ENSG00000157404/ENSG00000139515/ENSG00000104332…	VANGL2/WLS/SMO/HOXA5/GLI2/BARX1/HOXD13/ALDH1A2/ALX4/HLX/WNT5A/SALL1/CDX2/RARB/FOXF2/SIX2/FOXF1/PCSK5/DCHS1/TCF7/DACT1/PITX2/KIT/PDX1/SFRP1/FOXE1/SHOX2/EDNRB/BBS7/NKX2-2/NKX3-2/PKDCC/FAT4/C1GALT1/ZIC3/PDGFRA/FOXL1/ITGA6/PDGFC/CLDN18/ACVR2B/FGF9/GLI1/WDR19/EGFR/SAV1/RBPMS2/CCDC39	48
BP	GO:0048565	digestive tract development	45|2417	118|14725	1.077e-08	2.59639e-06	ENSG00000162738/ENSG00000128602/ENSG00000106004/ENSG00000074047/ENSG00000128714/ENSG00000128918/ENSG00000052850/ENSG00000136630/ENSG00000114251/ENSG00000103449/ENSG00000165556/ENSG00000077092/ENSG00000137273/ENSG00000170577/ENSG00000103241/ENSG00000099139/ENSG00000166341/ENSG00000081059/ENSG00000165617/ENSG00000164093/ENSG00000157404/ENSG00000139515/ENSG00000104332/ENSG00000178919/ENSG00000168779…	VANGL2/SMO/HOXA5/GLI2/HOXD13/ALDH1A2/ALX4/HLX/WNT5A/SALL1/CDX2/RARB/FOXF2/SIX2/FOXF1/PCSK5/DCHS1/TCF7/DACT1/PITX2/KIT/PDX1/SFRP1/FOXE1/SHOX2/EDNRB/BBS7/NKX2-2/NKX3-2/PKDCC/FAT4/C1GALT1/ZIC3/PDGFRA/FOXL1/ITGA6/PDGFC/CLDN18/ACVR2B/FGF9/GLI1/EGFR/SAV1/RBPMS2/CCDC39	45
BP	GO:0030900	forebrain development	98|2417	345|14725	1.10858e-08	2.59639e-06	ENSG00000159217/ENSG00000165300/ENSG00000170558/ENSG00000128602/ENSG00000074047/ENSG00000128573/ENSG00000143869/ENSG00000277586/ENSG00000184486/ENSG00000091136/ENSG00000128918/ENSG00000152192/ENSG00000114251/ENSG00000103449/ENSG00000010810/ENSG00000016082/ENSG00000077092/ENSG00000183873/ENSG00000087258/ENSG00000138795/ENSG00000185008/ENSG00000169554/ENSG00000007372/ENSG00000176165/ENSG00000183023…	IGF2BP1/SLITRK5/CDH2/SMO/GLI2/FOXP2/GDF7/NEFL/POU3F2/LAMB1/ALDH1A2/POU4F1/WNT5A/SALL1/FYN/ISL1/RARB/SCN5A/GNAO1/LEF1/ROBO2/ZEB2/PAX6/FOXG1/SLC8A1/SLIT2/POU3F3/OLIG2/LPAR1/TMEM108/PCDH9/DLX5/FOXB1/PROX1/EPHA5/DMD/SEMA3A/PITX2/DMRTA2/DYNC2H1/KCNC1/DLX2/ETS1/NRGN/MYH10/EMX2/APAF1/LHX8/UNCX/SATB2/PRKG1/CDON/NR2E1/NKX2-1/MSX1/SSTR2/FAT4/RPGRIP1L/EMX1/OTX2/DCLK2/SLC8A3/FUT10/LRRK2/CRTAC1/DOCK7/PGAP1/GA…	98
BP	GO:0001822	kidney development	76|2417	247|14725	1.259e-08	2.83073e-06	ENSG00000085662/ENSG00000147257/ENSG00000162738/ENSG00000154734/ENSG00000116962/ENSG00000128602/ENSG00000074047/ENSG00000005073/ENSG00000128918/ENSG00000125931/ENSG00000103449/ENSG00000077092/ENSG00000128713/ENSG00000185008/ENSG00000170577/ENSG00000138685/ENSG00000081181/ENSG00000099139/ENSG00000145147/ENSG00000119630/ENSG00000166341/ENSG00000198914/ENSG00000005513/ENSG00000171016/ENSG00000184937…	AKR1B1/GPC3/VANGL2/ADAMTS1/NID1/SMO/GLI2/HOXA11/ALDH1A2/CITED1/SALL1/RARB/HOXD11/ROBO2/SIX2/FGF2/ARG2/PCSK5/SLIT2/PGF/DCHS1/POU3F3/SOX8/PYGO1/WT1/KLF15/PTCH1/SERPINF1/FOXC1/PROX1/EPHA7/MME/MEF2C/EYA1/PLCE1/ITGA8/WNK4/SFRP1/PAX2/SMAD9/KLHL3/LRP4/ANGPT1/CA2/HEYL/BMP6/TP73/FAT4/GREB1L/RPGRIP1L/HAS2/AGTR1/C1GALT1/BMPER/LRRK2/CEP290/SIX1/FOXC2/PDGFRA/ODC1/CENPF/ZBTB16/PTPRO/KIF3A/SIM1/CD34/ACVR2B/NOG/…	76
BP	GO:0048704	embryonic skeletal system morphogenesis	37|2417	89|14725	1.46792e-08	3.06149e-06	ENSG00000184058/ENSG00000148516/ENSG00000106004/ENSG00000105997/ENSG00000005073/ENSG00000052850/ENSG00000120068/ENSG00000106006/ENSG00000128710/ENSG00000108511/ENSG00000105991/ENSG00000120093/ENSG00000122691/ENSG00000170577/ENSG00000182742/ENSG00000180318/ENSG00000128709/ENSG00000081189/ENSG00000104313/ENSG00000120075/ENSG00000168779/ENSG00000115844/ENSG00000139219/ENSG00000119042/ENSG00000116132…	TBX1/ZEB1/HOXA5/HOXA3/HOXA11/ALX4/HOXB8/HOXA6/HOXD10/HOXB6/HOXA1/HOXB3/TWIST1/SIX2/HOXB4/ALX1/HOXD9/MEF2C/EYA1/HOXB5/SHOX2/DLX2/COL2A1/SATB2/PRRX1/HOXA7/HOXA2/HOXB2/FLVCR1/SIX1/FOXC2/PDGFRA/NOG/WDR19/HOXD3/OSR1/RDH10	37
BP	GO:0014706	striated muscle tissue development	95|2417	333|14725	1.47056e-08	3.06149e-06	ENSG00000152661/ENSG00000233276/ENSG00000184058/ENSG00000128602/ENSG00000128573/ENSG00000182963/ENSG00000128918/ENSG00000112276/ENSG00000136630/ENSG00000152192/ENSG00000114251/ENSG00000183072/ENSG00000128710/ENSG00000069702/ENSG00000016082/ENSG00000077092/ENSG00000179456/ENSG00000138795/ENSG00000162614/ENSG00000122691/ENSG00000138685/ENSG00000183023/ENSG00000169946/ENSG00000005513/ENSG00000184937…	GJA1/GPX1/TBX1/SMO/FOXP2/GJC1/ALDH1A2/BVES/HLX/POU4F1/WNT5A/NKX2-5/HOXD10/TGFBR3/ISL1/RARB/ZBTB18/LEF1/NEXN/TWIST1/FGF2/SLC8A1/ZFPM2/SOX8/WT1/ACTN2/HOXD9/SOX6/FOXC1/VAX1/PROX1/HAND1/DMD/PAX7/MEF2C/CXADR/HEG1/PITX2/EYA1/DMRTA2/SHOX2/EPHB1/VGLL2/MSC/MYH10/TTN/S1PR1/TBX20/MYOM2/SORBS2/KLHL41/PAK1/TLL2/CDON/MYH15/COL19A1/HEYL/ACADM/TP73/MEIS1/HDAC9/CYP26B1/CAV3/ACTA1/SIX1/MEGF10/FOXC2/DSG2/PDGFRA/CEN…	95
BP	GO:0060537	muscle tissue development	98|2417	348|14725	1.78975e-08	3.59293e-06	ENSG00000152661/ENSG00000233276/ENSG00000184058/ENSG00000128602/ENSG00000128573/ENSG00000182963/ENSG00000128918/ENSG00000112276/ENSG00000136630/ENSG00000152192/ENSG00000114251/ENSG00000183072/ENSG00000128710/ENSG00000069702/ENSG00000016082/ENSG00000077092/ENSG00000179456/ENSG00000138795/ENSG00000162614/ENSG00000122691/ENSG00000138685/ENSG00000183023/ENSG00000169946/ENSG00000005513/ENSG00000184937…	GJA1/GPX1/TBX1/SMO/FOXP2/GJC1/ALDH1A2/BVES/HLX/POU4F1/WNT5A/NKX2-5/HOXD10/TGFBR3/ISL1/RARB/ZBTB18/LEF1/NEXN/TWIST1/FGF2/SLC8A1/ZFPM2/SOX8/WT1/ACTN2/HOXD9/SOX6/FOXC1/VAX1/PROX1/HAND1/DMD/PAX7/MEF2C/CXADR/HEG1/PITX2/EYA1/DMRTA2/ITGA8/SHOX2/EPHB1/VGLL2/MSC/MYH10/TTN/S1PR1/TBX20/MYOM2/SORBS2/KLHL41/PAK1/TLL2/CDON/MYH15/COL19A1/HEYL/ACADM/TP73/MEIS1/HDAC9/CYP26B1/CAV3/ACTA1/SIX1/MEGF10/FOXC2/DSG2/PDGF…	98
BP	GO:0007507	heart development	127|2417	487|14725	2.41647e-08	4.68378e-06	ENSG00000152661/ENSG00000147257/ENSG00000164683/ENSG00000162738/ENSG00000154734/ENSG00000184058/ENSG00000203867/ENSG00000145362/ENSG00000128602/ENSG00000074047/ENSG00000182963/ENSG00000128918/ENSG00000112276/ENSG00000019549/ENSG00000152192/ENSG00000114251/ENSG00000183072/ENSG00000103449/ENSG00000069702/ENSG00000016082/ENSG00000077092/ENSG00000183873/ENSG00000162614/ENSG00000122691/ENSG00000122870…	GJA1/GPC3/HEY1/VANGL2/ADAMTS1/TBX1/RBM20/ANK2/SMO/GLI2/GJC1/ALDH1A2/BVES/SNAI2/POU4F1/WNT5A/NKX2-5/SALL1/TGFBR3/ISL1/RARB/SCN5A/NEXN/TWIST1/BICC1/FGF2/SLC8A1/FOXF1/PCSK5/DCHS1/ZFPM2/WT1/ACTN2/SOX6/PTCH1/FOXC1/PROX1/HAND1/HAND2/ARMC4/LBX1/MEF2C/CXADR/HEG1/PITX2/EYA1/PLCE1/TBC1D32/DYNC2H1/PDLIM3/SHOX2/NRP2/SH3PXD2B/MYH10/BBS7/COL2A1/RAMP2/LOX/TTN/TMEM100/S1PR1/TBX20/SORBS2/PAK1/ATM/CALCRL/MSX1/HEYL…	127
BP	GO:0043583	ear development	61|2417	195|14725	1.76335e-07	3.30393e-05	ENSG00000162738/ENSG00000184058/ENSG00000148516/ENSG00000074047/ENSG00000114251/ENSG00000055732/ENSG00000103449/ENSG00000105991/ENSG00000153291/ENSG00000185483/ENSG00000122691/ENSG00000176165/ENSG00000170577/ENSG00000178573/ENSG00000166341/ENSG00000006377/ENSG00000105928/ENSG00000119715/ENSG00000112319/ENSG00000107736/ENSG00000095777/ENSG00000105880/ENSG00000117707/ENSG00000006611/ENSG00000099954…	VANGL2/TBX1/ZEB1/GLI2/WNT5A/MCOLN3/SALL1/HOXA1/SLC25A27/ROR1/TWIST1/FOXG1/SIX2/MAF/DCHS1/DLX6/GSDME/ESRRB/EYA4/CDH23/MYO3A/DLX5/PROX1/USH1C/CECR2/EYA1/ITGA8/PAX2/LGR5/COL2A1/SOBP/PRRX1/NKX3-2/HOXA2/MSX1/FAT4/PLPPR4/RPGRIP1L/ROR2/BMPER/CEP290/SIX1/SPARC/SPRY2/ATOH1/TSHZ1/TSHR/KIF3A/NOG/FGF9/WDR19/PDGFRB/TMIE/OSR1/HMX2/HMX3/PDZD7/WNT3A/RDH10/FZD3/KCNQ1	61
BP	GO:0048663	neuron fate commitment	27|2417	60|14725	1.84951e-07	3.35358e-05	ENSG00000074047/ENSG00000184486/ENSG00000152192/ENSG00000128710/ENSG00000016082/ENSG00000007372/ENSG00000176165/ENSG00000163623/ENSG00000180818/ENSG00000205927/ENSG00000198795/ENSG00000138136/ENSG00000009709/ENSG00000104313/ENSG00000142700/ENSG00000115844/ENSG00000125820/ENSG00000119042/ENSG00000116132/ENSG00000136352/ENSG00000164900/ENSG00000139445/ENSG00000184221/ENSG00000126778/ENSG00000159556…	GLI2/POU3F2/POU4F1/HOXD10/ISL1/PAX6/FOXG1/NKX6-1/HOXC10/OLIG2/ZNF521/LBX1/PAX7/EYA1/DMRTA2/DLX2/NKX2-2/SATB2/PRRX1/NKX2-1/GBX1/FOXN4/OLIG1/SIX1/ISL2/ATOH1/DMRT3	27
BP	GO:0021537	telencephalon development	69|2417	231|14725	2.0795e-07	3.65278e-05	ENSG00000159217/ENSG00000165300/ENSG00000170558/ENSG00000128602/ENSG00000128573/ENSG00000277586/ENSG00000184486/ENSG00000091136/ENSG00000114251/ENSG00000103449/ENSG00000077092/ENSG00000183873/ENSG00000138795/ENSG00000185008/ENSG00000169554/ENSG00000007372/ENSG00000176165/ENSG00000183023/ENSG00000145147/ENSG00000198914/ENSG00000198121/ENSG00000144868/ENSG00000105880/ENSG00000171956/ENSG00000117707…	IGF2BP1/SLITRK5/CDH2/SMO/FOXP2/NEFL/POU3F2/LAMB1/WNT5A/SALL1/RARB/SCN5A/LEF1/ROBO2/ZEB2/PAX6/FOXG1/SLC8A1/SLIT2/POU3F3/LPAR1/TMEM108/DLX5/FOXB1/PROX1/EPHA5/DMD/SEMA3A/DMRTA2/DLX2/NRGN/MYH10/EMX2/UNCX/CDON/NR2E1/NKX2-1/FAT4/RPGRIP1L/EMX1/DCLK2/SLC8A3/FUT10/LRRK2/CRTAC1/GART/AQP1/NPY/ATOH1/AVPR1A/KIF3A/HPRT1/NTRK2/ASPM/DIXDC1/SIX3/AFDN/EGFR/AGTPBP1/ATP2B4/MFSD2A/GNG12/ID4/WNT3A/HTR6/FEZ1/EFHC1/MCPH…	69
BP	GO:0042471	ear morphogenesis	41|2417	113|14725	2.37312e-07	3.88929e-05	ENSG00000162738/ENSG00000184058/ENSG00000148516/ENSG00000074047/ENSG00000114251/ENSG00000103449/ENSG00000105991/ENSG00000122691/ENSG00000176165/ENSG00000170577/ENSG00000006377/ENSG00000095777/ENSG00000105880/ENSG00000117707/ENSG00000006611/ENSG00000104313/ENSG00000077943/ENSG00000075891/ENSG00000139219/ENSG00000112320/ENSG00000116132/ENSG00000109705/ENSG00000105996/ENSG00000163132/ENSG00000169071…	VANGL2/TBX1/ZEB1/GLI2/WNT5A/SALL1/HOXA1/TWIST1/FOXG1/SIX2/DLX6/MYO3A/DLX5/PROX1/USH1C/EYA1/ITGA8/PAX2/COL2A1/SOBP/PRRX1/NKX3-2/HOXA2/MSX1/ROR2/CEP290/SIX1/SPRY2/ATOH1/TSHZ1/TSHR/NOG/FGF9/WDR19/TMIE/OSR1/HMX2/HMX3/PDZD7/WNT3A/FZD3	41
BP	GO:0021953	central nervous system neuron differentiation	52|2417	158|14725	2.38874e-07	3.88929e-05	ENSG00000128602/ENSG00000074047/ENSG00000143869/ENSG00000152192/ENSG00000114251/ENSG00000128710/ENSG00000103449/ENSG00000016082/ENSG00000138795/ENSG00000185008/ENSG00000169554/ENSG00000007372/ENSG00000176165/ENSG00000163623/ENSG00000126970/ENSG00000145147/ENSG00000180818/ENSG00000205927/ENSG00000185920/ENSG00000105880/ENSG00000117707/ENSG00000138136/ENSG00000009709/ENSG00000075213/ENSG00000104332…	SMO/GLI2/GDF7/POU4F1/WNT5A/HOXD10/SALL1/ISL1/LEF1/ROBO2/ZEB2/PAX6/FOXG1/NKX6-1/ZC4H2/SLIT2/HOXC10/OLIG2/PTCH1/DLX5/PROX1/LBX1/PAX7/SEMA3A/SFRP1/DYNC2H1/EPHB1/DLX2/TAL1/LHX8/TBX20/UNCX/NKX2-2/SATB2/NR2E1/NKX2-1/GBX1/EMX1/RORA/FOXN4/MDGA1/DCLK2/GRID2/ISL2/CBLN1/NPY/HPRT1/NTRK2/AGTPBP1/DMRT3/ID4/WNT3A	52
BP	GO:0030198	extracellular matrix organization	84|2417	300|14725	2.42173e-07	3.88929e-05	ENSG00000166086/ENSG00000134871/ENSG00000107957/ENSG00000138829/ENSG00000087303/ENSG00000116962/ENSG00000050555/ENSG00000156140/ENSG00000162493/ENSG00000213949/ENSG00000197565/ENSG00000091136/ENSG00000038427/ENSG00000140092/ENSG00000162909/ENSG00000187955/ENSG00000101680/ENSG00000187498/ENSG00000137273/ENSG00000115232/ENSG00000077942/ENSG00000162733/ENSG00000138685/ENSG00000103241/ENSG00000112769…	JAM3/COL4A2/SH3PXD2A/FBN2/NID2/NID1/LAMC3/ADAMTS3/PDPN/ITGA1/COL4A6/LAMB1/VCAN/FBLN5/CAPN2/COL14A1/LAMA1/COL4A1/FOXF2/ITGA4/FBLN1/DDR2/FGF2/FOXF1/LAMA4/COL13A1/WT1/FOXC1/COL4A5/ERO1B/CCDC80/ADAMTS20/NDNF/ADAMTS2/COL5A2/GPM6B/ITGA8/MMP2/SH3PXD2B/EGFLAM/ETS1/COL2A1/RAMP2/LOX/ITGA9/SPINK5/LAMA2/RECK/MFAP2/TLL2/NR2E1/COL19A1/COMP/THBS4/ANTXR1/HSD17B12/HAS2/JAM2/COL6A1/SCUBE1/FBLN2/OLFML2B/SPARC/FOXC2…	84
BP	GO:0001708	cell fate specification	29|2417	70|14725	5.7114e-07	8.91772e-05	ENSG00000184058/ENSG00000128602/ENSG00000074047/ENSG00000005073/ENSG00000184486/ENSG00000152192/ENSG00000128710/ENSG00000016082/ENSG00000007372/ENSG00000170577/ENSG00000163623/ENSG00000138685/ENSG00000180818/ENSG00000205927/ENSG00000110693/ENSG00000185920/ENSG00000138136/ENSG00000104313/ENSG00000142700/ENSG00000075891/ENSG00000117425/ENSG00000125820/ENSG00000064309/ENSG00000126778/ENSG00000159556…	TBX1/SMO/GLI2/HOXA11/POU3F2/POU4F1/HOXD10/ISL1/PAX6/SIX2/NKX6-1/FGF2/HOXC10/OLIG2/SOX6/PTCH1/LBX1/EYA1/DMRTA2/PAX2/PTCH2/NKX2-2/CDON/SIX1/ISL2/ATOH1/POU5F1/DMRT3/WNT3A	29
BP	GO:0009953	dorsal/ventral pattern formation	34|2417	89|14725	6.2436e-07	9.48521e-05	ENSG00000128602/ENSG00000074047/ENSG00000005073/ENSG00000128713/ENSG00000143147/ENSG00000007372/ENSG00000176165/ENSG00000163623/ENSG00000163064/ENSG00000185920/ENSG00000164066/ENSG00000009709/ENSG00000146350/ENSG00000164651/ENSG00000104332/ENSG00000187240/ENSG00000164532/ENSG00000134569/ENSG00000125820/ENSG00000136352/ENSG00000105996/ENSG00000171243/ENSG00000173917/ENSG00000139445/ENSG00000131437…	SMO/GLI2/HOXA11/HOXD11/GPR161/PAX6/FOXG1/NKX6-1/EN1/PTCH1/INTU/PAX7/TBC1D32/SP8/SFRP1/DYNC2H1/TBX20/LRP4/NKX2-2/NKX2-1/HOXA2/SOSTDC1/HOXB2/FOXN4/KIF3A/SIX3/NOG/GLI1/WDR19/TRAF3IP1/DMRT3/PRKACB/WNT3A/DISP1	34
BP	GO:0021515	cell differentiation in spinal cord	22|2417	46|14725	6.90122e-07	9.60697e-05	ENSG00000074047/ENSG00000143869/ENSG00000128710/ENSG00000016082/ENSG00000007372/ENSG00000163623/ENSG00000126970/ENSG00000180818/ENSG00000205927/ENSG00000185920/ENSG00000138136/ENSG00000009709/ENSG00000187240/ENSG00000162367/ENSG00000164532/ENSG00000125820/ENSG00000164900/ENSG00000139445/ENSG00000112139/ENSG00000159556/ENSG00000064218/ENSG00000154342	GLI2/GDF7/HOXD10/ISL1/PAX6/NKX6-1/ZC4H2/HOXC10/OLIG2/PTCH1/LBX1/PAX7/DYNC2H1/TAL1/TBX20/NKX2-2/GBX1/FOXN4/MDGA1/ISL2/DMRT3/WNT3A	22
BP	GO:0009855	determination of bilateral symmetry	41|2417	117|14725	6.92702e-07	9.60697e-05	ENSG00000152661/ENSG00000162738/ENSG00000184058/ENSG00000128602/ENSG00000146122/ENSG00000128918/ENSG00000114251/ENSG00000183072/ENSG00000122870/ENSG00000103241/ENSG00000099139/ENSG00000113196/ENSG00000164107/ENSG00000169126/ENSG00000138136/ENSG00000081189/ENSG00000164093/ENSG00000146350/ENSG00000187240/ENSG00000138686/ENSG00000164532/ENSG00000109705/ENSG00000171243/ENSG00000113966/ENSG00000103494…	GJA1/VANGL2/TBX1/SMO/DAAM2/ALDH1A2/WNT5A/NKX2-5/BICC1/FOXF1/PCSK5/HAND1/HAND2/ARMC4/LBX1/MEF2C/PITX2/TBC1D32/DYNC2H1/BBS7/TBX20/NKX3-2/SOSTDC1/ARL6/RPGRIP1L/RIPPLY2/FOXN4/ZIC3/KIF3A/DYNC2LI1/RTTN/ACVR2B/DNAH11/TBXT/PKD1L1/WNT3A/CCDC151/MIB1/CCDC39/DISP1/TBX3	41
BP	GO:0001525	angiogenesis	113|2417	446|14725	6.96557e-07	9.60697e-05	ENSG00000149948/ENSG00000233276/ENSG00000166086/ENSG00000134871/ENSG00000164683/ENSG00000184058/ENSG00000126016/ENSG00000106004/ENSG00000196628/ENSG00000159184/ENSG00000105997/ENSG00000128805/ENSG00000076706/ENSG00000114251/ENSG00000037280/ENSG00000187498/ENSG00000016082/ENSG00000102755/ENSG00000138795/ENSG00000116678/ENSG00000027869/ENSG00000120093/ENSG00000122691/ENSG00000138685/ENSG00000166501…	HMGA2/GPX1/JAM3/COL4A2/HEY1/TBX1/AMOT/HOXA5/TCF4/HOXB13/HOXA3/ARHGAP22/MCAM/WNT5A/FLT4/COL4A1/ISL1/FLT1/LEF1/LEPR/SH2D2A/HOXB3/TWIST1/FGF2/PRKCB/ADGRB3/SLIT2/PGF/SERPINF1/FOXC1/NDNF/HAND1/PPP1R16B/HAND2/PITX2/PTPRM/SFRP1/CD40/EPHB1/NRP2/MMP2/ETS1/RAMP2/TAL1/TMEM100/JCAD/SPINK5/S1PR1/TBX20/AKT3/HOXA7/NR2E1/ANGPT1/THBS4/CALCRL/PRKD1/MIR221/ADGRA2/TNMD/APLN/MEIS1/RORA/HDAC9/PTGIS/AGTR1/TNFSF12/C1GAL…	113
BP	GO:0007368	determination of left/right symmetry	39|2417	109|14725	7.0074e-07	9.60697e-05	ENSG00000152661/ENSG00000162738/ENSG00000184058/ENSG00000128602/ENSG00000146122/ENSG00000114251/ENSG00000183072/ENSG00000122870/ENSG00000103241/ENSG00000099139/ENSG00000113196/ENSG00000164107/ENSG00000169126/ENSG00000138136/ENSG00000081189/ENSG00000164093/ENSG00000146350/ENSG00000187240/ENSG00000138686/ENSG00000164532/ENSG00000109705/ENSG00000113966/ENSG00000103494/ENSG00000203877/ENSG00000139445…	GJA1/VANGL2/TBX1/SMO/DAAM2/WNT5A/NKX2-5/BICC1/FOXF1/PCSK5/HAND1/HAND2/ARMC4/LBX1/MEF2C/PITX2/TBC1D32/DYNC2H1/BBS7/TBX20/NKX3-2/ARL6/RPGRIP1L/RIPPLY2/FOXN4/ZIC3/KIF3A/DYNC2LI1/RTTN/ACVR2B/DNAH11/TBXT/PKD1L1/WNT3A/CCDC151/MIB1/CCDC39/DISP1/TBX3	39
BP	GO:0001654	eye development	85|2417	312|14725	7.31185e-07	9.78569e-05	ENSG00000152661/ENSG00000198732/ENSG00000138829/ENSG00000050555/ENSG00000148516/ENSG00000128573/ENSG00000177707/ENSG00000128918/ENSG00000114251/ENSG00000187498/ENSG00000077092/ENSG00000137273/ENSG00000169554/ENSG00000007372/ENSG00000166402/ENSG00000122691/ENSG00000178573/ENSG00000005513/ENSG00000184937/ENSG00000132386/ENSG00000054598/ENSG00000148704/ENSG00000117707/ENSG00000204262/ENSG00000140807…	GJA1/SMOC1/FBN2/LAMC3/ZEB1/FOXP2/NECTIN3/ALDH1A2/WNT5A/COL4A1/RARB/FOXF2/ZEB2/PAX6/TUB/TWIST1/MAF/SOX8/WT1/SERPINF1/FOXC1/VAX1/PROX1/COL5A2/NKD1/PITX2/TBC1D32/PTPRM/NPHP1/PAX2/EPHB1/DLX2/SH3PXD2B/MERTK/CHRDL1/MYH10/BBS7/MAB21L1/MYOM2/GPM6A/MFAP2/CDON/MYH15/NR2E1/BMP6/ARL6/RPGRIP1L/PITX3/MEIS1/FOXN4/SDK2/TSPAN12/CEP290/FOXC2/CCDC66/PDGFRA/RORB/HDAC2/CNTF/NTRK2/ACVR2B/SIX3/FGF9/WDR19/EGFR/AGTPBP1/T…	85
BP	GO:0043062	extracellular structure organization	91|2417	341|14725	8.04251e-07	0.000105132	ENSG00000166086/ENSG00000134871/ENSG00000107957/ENSG00000138829/ENSG00000087303/ENSG00000116962/ENSG00000050555/ENSG00000156140/ENSG00000162493/ENSG00000213949/ENSG00000197565/ENSG00000091136/ENSG00000038427/ENSG00000140092/ENSG00000162909/ENSG00000187955/ENSG00000101680/ENSG00000187498/ENSG00000100979/ENSG00000137273/ENSG00000115232/ENSG00000077942/ENSG00000162733/ENSG00000130208/ENSG00000138685…	JAM3/COL4A2/SH3PXD2A/FBN2/NID2/NID1/LAMC3/ADAMTS3/PDPN/ITGA1/COL4A6/LAMB1/VCAN/FBLN5/CAPN2/COL14A1/LAMA1/COL4A1/PLTP/FOXF2/ITGA4/FBLN1/DDR2/APOC1/FGF2/FOXF1/LAMA4/COL13A1/WT1/FOXC1/COL4A5/ERO1B/CCDC80/ADAMTS20/NDNF/ADAMTS2/COL5A2/GPM6B/ITGA8/MMP2/SH3PXD2B/EGFLAM/ETS1/LPL/COL2A1/RAMP2/LOX/ITGA9/SPINK5/LAMA2/RECK/MFAP2/TLL2/NR2E1/COL19A1/COMP/THBS4/PLA2G7/ANTXR1/HSD17B12/HAS2/AGTR1/JAM2/COL6A1/SCUB…	91
BP	GO:0021510	spinal cord development	34|2417	90|14725	8.46556e-07	0.000108148	ENSG00000128602/ENSG00000074047/ENSG00000143869/ENSG00000277586/ENSG00000146122/ENSG00000120068/ENSG00000128710/ENSG00000016082/ENSG00000185008/ENSG00000007372/ENSG00000163623/ENSG00000126970/ENSG00000180818/ENSG00000205927/ENSG00000185920/ENSG00000171956/ENSG00000164066/ENSG00000117707/ENSG00000138136/ENSG00000009709/ENSG00000187240/ENSG00000162367/ENSG00000164532/ENSG00000164853/ENSG00000125820…	SMO/GLI2/GDF7/NEFL/DAAM2/HOXB8/HOXD10/ISL1/ROBO2/PAX6/NKX6-1/ZC4H2/HOXC10/OLIG2/PTCH1/FOXB1/INTU/PROX1/LBX1/PAX7/DYNC2H1/TAL1/TBX20/UNCX/NKX2-2/GBX1/FOXN4/MDGA1/ISL2/PTBP2/NOG/DMRT3/WNT3A/PLXDC1	34
BP	GO:0009799	specification of symmetry	41|2417	118|14725	8.94997e-07	0.000111795	ENSG00000152661/ENSG00000162738/ENSG00000184058/ENSG00000128602/ENSG00000146122/ENSG00000128918/ENSG00000114251/ENSG00000183072/ENSG00000122870/ENSG00000103241/ENSG00000099139/ENSG00000113196/ENSG00000164107/ENSG00000169126/ENSG00000138136/ENSG00000081189/ENSG00000164093/ENSG00000146350/ENSG00000187240/ENSG00000138686/ENSG00000164532/ENSG00000109705/ENSG00000171243/ENSG00000113966/ENSG00000103494…	GJA1/VANGL2/TBX1/SMO/DAAM2/ALDH1A2/WNT5A/NKX2-5/BICC1/FOXF1/PCSK5/HAND1/HAND2/ARMC4/LBX1/MEF2C/PITX2/TBC1D32/DYNC2H1/BBS7/TBX20/NKX3-2/SOSTDC1/ARL6/RPGRIP1L/RIPPLY2/FOXN4/ZIC3/KIF3A/DYNC2LI1/RTTN/ACVR2B/DNAH11/TBXT/PKD1L1/WNT3A/CCDC151/MIB1/CCDC39/DISP1/TBX3	41
BP	GO:0061564	axon development	114|2417	454|14725	1.0039e-06	0.000121737	ENSG00000165300/ENSG00000154277/ENSG00000166086/ENSG00000149294/ENSG00000162738/ENSG00000104722/ENSG00000074047/ENSG00000143869/ENSG00000155980/ENSG00000166313/ENSG00000277586/ENSG00000184486/ENSG00000183853/ENSG00000152192/ENSG00000114251/ENSG00000010810/ENSG00000016082/ENSG00000072832/ENSG00000185008/ENSG00000169554/ENSG00000131711/ENSG00000188517/ENSG00000171517/ENSG00000007372/ENSG00000176165…	SLITRK5/UCHL1/JAM3/NCAM1/VANGL2/NEFM/GLI2/GDF7/KIF5A/APBB1/NEFL/POU3F2/KIRREL1/POU4F1/WNT5A/FYN/ISL1/CRMP1/ROBO2/ZEB2/MAP1B/COL25A1/LPAR3/PAX6/FOXG1/NKX6-1/SLITRK3/SLIT2/ROBO3/AUTS2/PRKCQ/PTCH1/EPHA8/DLX5/FOXB1/SLC9A6/VAX1/EPHA5/EPHA7/TSPAN2/TUBB2B/SEMA3A/BRSK1/SPART/PTPRM/PAX2/SHOX2/ETV1/EPHB1/NRP2/MYH10/BARHL2/RNF165/LAMA2/SEMA3G/LRP4/LHX9/PAK1/NR2E1/NKX2-1/GAP43/NLGN3/HOXA2/USP33/NPTX1/ATL1/MI…	114
BP	GO:0009954	proximal/distal pattern formation	15|2417	25|14725	1.01791e-06	0.000121737	ENSG00000253293/ENSG00000074047/ENSG00000005073/ENSG00000128918/ENSG00000128710/ENSG00000180818/ENSG00000163064/ENSG00000128709/ENSG00000164651/ENSG00000115844/ENSG00000134569/ENSG00000003137/ENSG00000138083/ENSG00000111087/ENSG00000143867	HOXA10/GLI2/HOXA11/ALDH1A2/HOXD10/HOXC10/EN1/HOXD9/SP8/DLX2/LRP4/CYP26B1/SIX3/GLI1/OSR1	15
BP	GO:0048665	neuron fate specification	16|2417	28|14725	1.10288e-06	0.000129152	ENSG00000074047/ENSG00000184486/ENSG00000152192/ENSG00000128710/ENSG00000016082/ENSG00000007372/ENSG00000163623/ENSG00000180818/ENSG00000138136/ENSG00000104313/ENSG00000142700/ENSG00000125820/ENSG00000126778/ENSG00000159556/ENSG00000172238/ENSG00000064218	GLI2/POU3F2/POU4F1/HOXD10/ISL1/PAX6/NKX6-1/HOXC10/LBX1/EYA1/DMRTA2/NKX2-2/SIX1/ISL2/ATOH1/DMRT3	16
BP	GO:0008589	regulation of smoothened signaling pathway	29|2417	72|14725	1.15227e-06	0.000132181	ENSG00000147257/ENSG00000109113/ENSG00000128602/ENSG00000074047/ENSG00000180447/ENSG00000072840/ENSG00000143147/ENSG00000185920/ENSG00000164066/ENSG00000104332/ENSG00000187240/ENSG00000168779/ENSG00000135919/ENSG00000117425/ENSG00000116132/ENSG00000113966/ENSG00000103494/ENSG00000069667/ENSG00000165588/ENSG00000159307/ENSG00000168301/ENSG00000146197/ENSG00000106524/ENSG00000102678/ENSG00000111087…	GPC3/RAB34/SMO/GLI2/GAS1/EVC/GPR161/PTCH1/INTU/SFRP1/DYNC2H1/SHOX2/SERPINE2/PTCH2/PRRX1/ARL6/RPGRIP1L/RORA/OTX2/SCUBE1/KCTD6/SCUBE3/ANKMY2/FGF9/GLI1/TRAF3IP1/KIF7/PRKACB/DISP1	29
BP	GO:2000177	regulation of neural precursor cell proliferation	30|2417	76|14725	1.25779e-06	0.000141401	ENSG00000102038/ENSG00000170558/ENSG00000128602/ENSG00000074047/ENSG00000114251/ENSG00000007372/ENSG00000176165/ENSG00000148704/ENSG00000117707/ENSG00000108576/ENSG00000142700/ENSG00000173404/ENSG00000064309/ENSG00000112333/ENSG00000206557/ENSG00000135638/ENSG00000107859/ENSG00000188906/ENSG00000162946/ENSG00000106278/ENSG00000150907/ENSG00000117569/ENSG00000066279/ENSG00000138083/ENSG00000111087…	SMARCA1/CDH2/SMO/GLI2/WNT5A/PAX6/FOXG1/VAX1/PROX1/SLC6A4/DMRTA2/INSM1/CDON/NR2E1/TRIM71/EMX1/PITX3/LRRK2/DISC1/PTPRZ1/FOXO1/PTBP2/ASPM/SIX3/GLI1/AFDN/LYN/WNT3A/FZD3/CTSZ	30
BP	GO:0061351	neural precursor cell proliferation	44|2417	132|14725	1.33292e-06	0.000146909	ENSG00000159217/ENSG00000102038/ENSG00000170558/ENSG00000128602/ENSG00000184486/ENSG00000114251/ENSG00000165655/ENSG00000138795/ENSG00000169554/ENSG00000007372/ENSG00000176165/ENSG00000198914/ENSG00000148704/ENSG00000117707/ENSG00000108576/ENSG00000134532/ENSG00000142700/ENSG00000154928/ENSG00000170370/ENSG00000173404/ENSG00000064309/ENSG00000112333/ENSG00000206557/ENSG00000135638/ENSG00000107859…	IGF2BP1/SMARCA1/CDH2/SMO/POU3F2/WNT5A/ZNF503/LEF1/ZEB2/PAX6/FOXG1/POU3F3/VAX1/PROX1/SLC6A4/SOX5/DMRTA2/EPHB1/EMX2/INSM1/CDON/NR2E1/TRIM71/EMX1/PITX3/RORA/LRRK2/DOCK7/DISC1/PTPRZ1/FOXO1/PTBP2/KIF3A/ASPM/DIXDC1/HOOK3/SIX3/AFDN/LYN/ID4/RRM1/WNT3A/FZD3/CTSZ	44
BP	GO:0060021	roof of mouth development	31|2417	81|14725	1.84401e-06	0.000199166	ENSG00000184058/ENSG00000052850/ENSG00000019549/ENSG00000114251/ENSG00000069702/ENSG00000137273/ENSG00000138795/ENSG00000122691/ENSG00000006377/ENSG00000180318/ENSG00000105880/ENSG00000148704/ENSG00000173068/ENSG00000164107/ENSG00000081189/ENSG00000178919/ENSG00000178860/ENSG00000138686/ENSG00000139219/ENSG00000119042/ENSG00000116132/ENSG00000163132/ENSG00000162878/ENSG00000134853/ENSG00000179981…	TBX1/ALX4/SNAI2/WNT5A/TGFBR3/FOXF2/LEF1/TWIST1/DLX6/ALX1/DLX5/VAX1/BNC2/HAND2/MEF2C/FOXE1/MSC/BBS7/COL2A1/SATB2/PRRX1/MSX1/PKDCC/PDGFRA/TSHZ1/BCOR/ACVR2B/OSR1/WNT3A/ASPH/TBX3	31
BP	GO:0001709	cell fate determination	18|2417	35|14725	1.87792e-06	0.000199166	ENSG00000016082/ENSG00000007372/ENSG00000176165/ENSG00000185920/ENSG00000117707/ENSG00000138136/ENSG00000081189/ENSG00000075891/ENSG00000143032/ENSG00000117425/ENSG00000125820/ENSG00000116132/ENSG00000105996/ENSG00000221818/ENSG00000003137/ENSG00000106536/ENSG00000172238/ENSG00000129152	ISL1/PAX6/FOXG1/PTCH1/PROX1/LBX1/MEF2C/PAX2/BARHL2/PTCH2/NKX2-2/PRRX1/HOXA2/EBF2/CYP26B1/POU6F2/ATOH1/MYOD1	18
BP	GO:0048566	embryonic digestive tract development	16|2417	30|14725	3.78749e-06	0.00039425	ENSG00000074047/ENSG00000128918/ENSG00000136630/ENSG00000103449/ENSG00000077092/ENSG00000137273/ENSG00000170577/ENSG00000103241/ENSG00000099139/ENSG00000081059/ENSG00000164093/ENSG00000168779/ENSG00000162878/ENSG00000134853/ENSG00000102678/ENSG00000166831	GLI2/ALDH1A2/HLX/SALL1/RARB/FOXF2/SIX2/FOXF1/PCSK5/TCF7/PITX2/SHOX2/PKDCC/PDGFRA/FGF9/RBPMS2	16
BP	GO:0001763	morphogenesis of a branching structure	54|2417	182|14725	5.2596e-06	0.000537532	ENSG00000147257/ENSG00000162738/ENSG00000128602/ENSG00000106004/ENSG00000074047/ENSG00000159184/ENSG00000143869/ENSG00000005073/ENSG00000128714/ENSG00000125931/ENSG00000019549/ENSG00000114251/ENSG00000103449/ENSG00000187498/ENSG00000128713/ENSG00000138795/ENSG00000119866/ENSG00000170577/ENSG00000138685/ENSG00000103241/ENSG00000145147/ENSG00000119630/ENSG00000166341/ENSG00000197467/ENSG00000005513…	GPC3/VANGL2/SMO/HOXA5/GLI2/HOXB13/GDF7/HOXA11/HOXD13/CITED1/SNAI2/WNT5A/SALL1/COL4A1/HOXD11/LEF1/BCL11A/SIX2/FGF2/FOXF1/SLIT2/PGF/DCHS1/COL13A1/SOX8/WT1/PTCH1/PROX1/EPHA7/SEMA3A/PITX2/EYA1/SFRP1/PAX2/SHOX2/DLX2/TBX20/PAK1/NKX2-1/FAT4/CAV3/GCM1/LRRK2/SIX1/FOXC2/SPRY2/TNC/NOG/SULF1/EDNRA/MED1/RDH10/CTSZ/TBX3	54
BP	GO:0061448	connective tissue development	62|2417	219|14725	5.98783e-06	0.000601028	ENSG00000149948/ENSG00000148516/ENSG00000106004/ENSG00000074047/ENSG00000143869/ENSG00000105997/ENSG00000005073/ENSG00000019549/ENSG00000114251/ENSG00000072840/ENSG00000077092/ENSG00000120093/ENSG00000170577/ENSG00000138685/ENSG00000178573/ENSG00000005513/ENSG00000184937/ENSG00000180318/ENSG00000110693/ENSG00000134532/ENSG00000113196/ENSG00000164107/novel.261/ENSG00000009709/ENSG00000081189/ENSG0…	HMGA2/ZEB1/HOXA5/GLI2/GDF7/HOXA3/HOXA11/SNAI2/WNT5A/EVC/RARB/HOXB3/SIX2/FGF2/MAF/SOX8/WT1/ALX1/SOX6/SOX5/HAND1/HAND2/-/PAX7/MEF2C/SPART/HOXC4/SHOX2/DLX2/SMAD9/SH3PXD2B/COL2A1/UNCX/SATB2/RFLNB/PRRX1/NKX3-2/COMP/MSX1/PKDCC/BMP6/EBF2/TNMD/ROR2/AC006254.1/FOXC2/ZBTB16/GDF6/FTO/CD34/COL27A1/NOG/FGF9/WNT10B/TMEM110-MUSTN1/PDGFRB/OXCT1/HOXD3/SULF1/OSR1/ID4/SIRT1	62
BP	GO:0007409	axonogenesis	103|2417	417|14725	7.19723e-06	0.000709747	ENSG00000165300/ENSG00000154277/ENSG00000149294/ENSG00000162738/ENSG00000074047/ENSG00000143869/ENSG00000155980/ENSG00000166313/ENSG00000277586/ENSG00000184486/ENSG00000183853/ENSG00000152192/ENSG00000114251/ENSG00000010810/ENSG00000016082/ENSG00000072832/ENSG00000185008/ENSG00000169554/ENSG00000131711/ENSG00000188517/ENSG00000171517/ENSG00000007372/ENSG00000176165/ENSG00000163623/ENSG00000121871…	SLITRK5/UCHL1/NCAM1/VANGL2/GLI2/GDF7/KIF5A/APBB1/NEFL/POU3F2/KIRREL1/POU4F1/WNT5A/FYN/ISL1/CRMP1/ROBO2/ZEB2/MAP1B/COL25A1/LPAR3/PAX6/FOXG1/NKX6-1/SLITRK3/SLIT2/ROBO3/AUTS2/PRKCQ/PTCH1/EPHA8/DLX5/FOXB1/SLC9A6/VAX1/EPHA5/EPHA7/TUBB2B/SEMA3A/BRSK1/SPART/PTPRM/PAX2/SHOX2/ETV1/EPHB1/NRP2/MYH10/BARHL2/RNF165/LAMA2/SEMA3G/LRP4/LHX9/PAK1/NR2E1/NKX2-1/GAP43/NLGN3/HOXA2/USP33/NPTX1/ATL1/PLXNA2/GBX1/PAK3/PL…	103
BP	GO:0043010	camera-type eye development	72|2417	268|14725	8.57527e-06	0.000831062	ENSG00000152661/ENSG00000138829/ENSG00000050555/ENSG00000148516/ENSG00000128573/ENSG00000177707/ENSG00000128918/ENSG00000114251/ENSG00000187498/ENSG00000077092/ENSG00000137273/ENSG00000169554/ENSG00000007372/ENSG00000166402/ENSG00000122691/ENSG00000178573/ENSG00000005513/ENSG00000184937/ENSG00000132386/ENSG00000054598/ENSG00000148704/ENSG00000117707/ENSG00000164093/ENSG00000146350/ENSG00000173482…	GJA1/FBN2/LAMC3/ZEB1/FOXP2/NECTIN3/ALDH1A2/WNT5A/COL4A1/RARB/FOXF2/ZEB2/PAX6/TUB/TWIST1/MAF/SOX8/WT1/SERPINF1/FOXC1/VAX1/PROX1/PITX2/TBC1D32/PTPRM/NPHP1/PAX2/EPHB1/DLX2/MERTK/MYH10/MAB21L1/MYOM2/GPM6A/CDON/MYH15/NR2E1/ARL6/RPGRIP1L/PITX3/MEIS1/FOXN4/SDK2/TSPAN12/FOXC2/CCDC66/PDGFRA/RORB/HDAC2/NTRK2/ACVR2B/SIX3/WDR19/EGFR/AGTPBP1/TRAF3IP1/ATP2B4/PDGFRB/SLC4A5/CELF4/HDAC1/FBN1/CACNA1C/MED1/RRM1/MIT…	72
BP	GO:0042476	odontogenesis	37|2417	111|14725	9.00946e-06	0.000858342	ENSG00000184058/ENSG00000128602/ENSG00000074047/ENSG00000091136/ENSG00000183873/ENSG00000138795/ENSG00000122691/ENSG00000054598/ENSG00000113196/ENSG00000164107/ENSG00000164093/ENSG00000140090/ENSG00000115844/ENSG00000162624/ENSG00000134569/ENSG00000104267/ENSG00000162551/ENSG00000163132/ENSG00000171243/ENSG00000186951/ENSG00000125046/ENSG00000240583/ENSG00000178522/ENSG00000134853/ENSG00000150907…	TBX1/SMO/GLI2/LAMB1/SCN5A/LEF1/TWIST1/FOXC1/HAND1/HAND2/PITX2/SLC24A4/DLX2/LHX8/LRP4/CA2/ALPL/MSX1/SOSTDC1/PPARA/SSUH2/AQP1/AMBN/PDGFRA/FOXO1/HDAC2/ITGA6/TNC/BCOR/CD34/EDA/ACVR2B/HDAC1/DMRT3/OSR1/PAM/AQP6	37
BP	GO:0010001	glial cell differentiation	53|2417	181|14725	9.74081e-06	0.000912552	ENSG00000170558/ENSG00000084207/ENSG00000050555/ENSG00000128602/ENSG00000184486/ENSG00000146122/ENSG00000138795/ENSG00000185483/ENSG00000007372/ENSG00000163623/ENSG00000205927/ENSG00000005513/ENSG00000198121/ENSG00000163884/ENSG00000110693/ENSG00000136717/ENSG00000198947/ENSG00000134198/ENSG00000075891/ENSG00000115844/ENSG00000124920/ENSG00000135919/ENSG00000162367/ENSG00000196569/ENSG00000138675…	CDH2/GSTP1/LAMC3/SMO/POU3F2/DAAM2/LEF1/ROR1/PAX6/NKX6-1/OLIG2/SOX8/LPAR1/KLF15/SOX6/BIN1/DMD/TSPAN2/PAX2/DLX2/MYRF/SERPINE2/TAL1/LAMA2/FGF5/NKX2-2/NR2E1/NKX2-1/GAP43/NLGN3/TP73/EMX1/ROR2/NAB1/GCM1/SLC8A3/OLIG1/WASF3/PTPRZ1/PRDM8/POU3F1/HDAC2/CNTF/NTRK2/NOG/CDKN2C/AFDN/EGFR/LYN/ID4/ZNF488/CNTNAP1/EIF2B3	53
BP	GO:0048934	peripheral nervous system neuron differentiation	9|2417	12|14725	1.16633e-05	0.00105741	ENSG00000152192/ENSG00000128710/ENSG00000016082/ENSG00000128709/ENSG00000164107/ENSG00000006468/ENSG00000159556/ENSG00000148053/ENSG00000119547	POU4F1/HOXD10/ISL1/HOXD9/HAND2/ETV1/ISL2/NTRK2/ONECUT2	9
BP	GO:0048935	peripheral nervous system neuron development	9|2417	12|14725	1.16633e-05	0.00105741	ENSG00000152192/ENSG00000128710/ENSG00000016082/ENSG00000128709/ENSG00000164107/ENSG00000006468/ENSG00000159556/ENSG00000148053/ENSG00000119547	POU4F1/HOXD10/ISL1/HOXD9/HAND2/ETV1/ISL2/NTRK2/ONECUT2	9
BP	GO:0048839	inner ear development	50|2417	169|14725	1.26058e-05	0.00112472	ENSG00000162738/ENSG00000184058/ENSG00000148516/ENSG00000074047/ENSG00000114251/ENSG00000055732/ENSG00000105991/ENSG00000153291/ENSG00000185483/ENSG00000176165/ENSG00000178573/ENSG00000166341/ENSG00000006377/ENSG00000105928/ENSG00000119715/ENSG00000112319/ENSG00000107736/ENSG00000095777/ENSG00000105880/ENSG00000117707/ENSG00000006611/ENSG00000099954/ENSG00000104313/ENSG00000077943/ENSG00000075891…	VANGL2/TBX1/ZEB1/GLI2/WNT5A/MCOLN3/HOXA1/SLC25A27/ROR1/FOXG1/MAF/DCHS1/DLX6/GSDME/ESRRB/EYA4/CDH23/MYO3A/DLX5/PROX1/USH1C/CECR2/EYA1/ITGA8/PAX2/LGR5/COL2A1/SOBP/PRRX1/FAT4/PLPPR4/RPGRIP1L/ROR2/BMPER/CEP290/SIX1/SPARC/SPRY2/ATOH1/TSHR/KIF3A/FGF9/PDGFRB/TMIE/HMX2/HMX3/PDZD7/WNT3A/FZD3/KCNQ1	50
BP	GO:0035282	segmentation	29|2417	80|14725	1.35671e-05	0.00119157	ENSG00000114251/ENSG00000165556/ENSG00000138795/ENSG00000169554/ENSG00000103241/ENSG00000184937/ENSG00000054598/ENSG00000090932/ENSG00000171956/ENSG00000140807/ENSG00000075213/ENSG00000104332/ENSG00000125813/ENSG00000149311/ENSG00000143033/ENSG00000105996/ENSG00000076356/ENSG00000203877/ENSG00000169071/ENSG00000176692/ENSG00000175879/ENSG00000253729/ENSG00000164458/ENSG00000143867/ENSG00000154342…	WNT5A/CDX2/LEF1/ZEB2/FOXF1/WT1/FOXC1/DLL3/FOXB1/NKD1/SEMA3A/SFRP1/PAX1/ATM/MTF2/HOXA2/PLXNA2/RIPPLY2/ROR2/FOXC2/HOXD8/PRKDC/TBXT/OSR1/WNT3A/MIB1/MEOX1/MLLT3/TBX3	29
BP	GO:0021543	pallium development	47|2417	157|14725	1.61756e-05	0.00138146	ENSG00000159217/ENSG00000170558/ENSG00000128602/ENSG00000128573/ENSG00000277586/ENSG00000184486/ENSG00000091136/ENSG00000138795/ENSG00000169554/ENSG00000007372/ENSG00000176165/ENSG00000145147/ENSG00000198914/ENSG00000144868/ENSG00000117707/ENSG00000145242/ENSG00000198947/ENSG00000075213/ENSG00000142700/ENSG00000115844/ENSG00000170370/ENSG00000064309/ENSG00000112333/ENSG00000136352/ENSG00000196159…	IGF2BP1/CDH2/SMO/FOXP2/NEFL/POU3F2/LAMB1/LEF1/ZEB2/PAX6/FOXG1/SLIT2/POU3F3/TMEM108/PROX1/EPHA5/DMD/SEMA3A/DMRTA2/DLX2/EMX2/CDON/NR2E1/NKX2-1/FAT4/EMX1/DCLK2/FUT10/GART/NPY/ATOH1/KIF3A/NTRK2/ASPM/DIXDC1/AFDN/EGFR/ATP2B4/MFSD2A/GNG12/ID4/WNT3A/HTR6/FEZ1/EFHC1/MCPH1/EIF2B3	47
BP	GO:0021675	nerve development	25|2417	65|14725	1.62207e-05	0.00138146	ENSG00000079215/ENSG00000184058/ENSG00000105997/ENSG00000152192/ENSG00000103449/ENSG00000016082/ENSG00000105991/ENSG00000120093/ENSG00000188517/ENSG00000198121/ENSG00000198947/ENSG00000075213/ENSG00000075891/ENSG00000154928/ENSG00000118257/ENSG00000135919/ENSG00000141622/ENSG00000125820/ENSG00000171246/ENSG00000173917/ENSG00000177301/ENSG00000126778/ENSG00000198400/ENSG00000128652/ENSG00000137573	SLC1A3/TBX1/HOXA3/POU4F1/SALL1/ISL1/HOXA1/HOXB3/COL25A1/LPAR1/DMD/SEMA3A/PAX2/EPHB1/NRP2/SERPINE2/RNF165/NKX2-2/NPTX1/HOXB2/KCNA2/SIX1/NTRK1/HOXD3/SULF1	25
BP	GO:0030902	hindbrain development	41|2417	131|14725	1.72521e-05	0.00144737	ENSG00000116729/ENSG00000128602/ENSG00000074047/ENSG00000128573/ENSG00000128918/ENSG00000152192/ENSG00000183873/ENSG00000138795/ENSG00000120093/ENSG00000018236/ENSG00000163064/ENSG00000198121/ENSG00000054598/ENSG00000117707/ENSG00000108576/ENSG00000166165/ENSG00000129159/ENSG00000120693/ENSG00000133026/ENSG00000135919/ENSG00000149269/ENSG00000105996/ENSG00000180616/ENSG00000173917/ENSG00000076356…	WLS/SMO/GLI2/FOXP2/ALDH1A2/POU4F1/SCN5A/LEF1/HOXB3/CNTN1/EN1/LPAR1/FOXC1/PROX1/SLC6A4/CKB/KCNC1/SMAD9/MYH10/SERPINE2/PAK1/HOXA2/SSTR2/HOXB2/PLXNA2/TTBK2/RPGRIP1L/RORA/EN2/GNPAT/CEP290/GART/GRID2/CBLN1/PTBP2/NOG/GLI1/AGTPBP1/HNRNPD/RBFOX2/NEUROD2	41
BP	GO:0001946	lymphangiogenesis	10|2417	15|14725	1.88142e-05	0.00155522	ENSG00000162493/ENSG00000037280/ENSG00000054598/ENSG00000117707/ENSG00000183287/ENSG00000152104/ENSG00000176692/ENSG00000114739/ENSG00000071246/ENSG00000119608	PDPN/FLT4/FOXC1/PROX1/CCBE1/PTPN14/FOXC2/ACVR2B/VASH1/PROX2	10
BP	GO:0035136	forelimb morphogenesis	17|2417	37|14725	2.48074e-05	0.0019978	ENSG00000005073/ENSG00000128918/ENSG00000052850/ENSG00000128710/ENSG00000122691/ENSG00000163064/ENSG00000128709/ENSG00000168779/ENSG00000141622/ENSG00000122707/ENSG00000163132/ENSG00000103494/ENSG00000109906/ENSG00000143867/ENSG00000151067/ENSG00000121039/ENSG00000135111	HOXA11/ALDH1A2/ALX4/HOXD10/TWIST1/EN1/HOXD9/SHOX2/RNF165/RECK/MSX1/RPGRIP1L/ZBTB16/OSR1/CACNA1C/RDH10/TBX3	17
BP	GO:0021545	cranial nerve development	19|2417	44|14725	2.48792e-05	0.0019978	ENSG00000079215/ENSG00000184058/ENSG00000105997/ENSG00000152192/ENSG00000103449/ENSG00000016082/ENSG00000105991/ENSG00000120093/ENSG00000198121/ENSG00000198947/ENSG00000075213/ENSG00000075891/ENSG00000154928/ENSG00000125820/ENSG00000173917/ENSG00000177301/ENSG00000126778/ENSG00000198400/ENSG00000128652	SLC1A3/TBX1/HOXA3/POU4F1/SALL1/ISL1/HOXA1/HOXB3/LPAR1/DMD/SEMA3A/PAX2/EPHB1/NKX2-2/HOXB2/KCNA2/SIX1/NTRK1/HOXD3	19
BP	GO:0048738	cardiac muscle tissue development	53|2417	187|14725	2.66381e-05	0.00210891	ENSG00000152661/ENSG00000182963/ENSG00000128918/ENSG00000112276/ENSG00000152192/ENSG00000114251/ENSG00000183072/ENSG00000069702/ENSG00000016082/ENSG00000077092/ENSG00000162614/ENSG00000138685/ENSG00000183023/ENSG00000169946/ENSG00000184937/ENSG00000077522/ENSG00000110693/ENSG00000054598/ENSG00000117707/ENSG00000113196/ENSG00000081189/ENSG00000154639/ENSG00000173706/ENSG00000164093/ENSG00000133026…	GJA1/GJC1/ALDH1A2/BVES/POU4F1/WNT5A/NKX2-5/TGFBR3/ISL1/RARB/NEXN/FGF2/SLC8A1/ZFPM2/WT1/ACTN2/SOX6/FOXC1/PROX1/HAND1/MEF2C/CXADR/HEG1/PITX2/MYH10/TTN/S1PR1/TBX20/SORBS2/PAK1/ACADM/TP73/MEIS1/CAV3/FOXC2/DSG2/PDGFRA/EGLN1/NOG/FGF9/GLI1/HNRNPU/FHOD3/PDGFRB/DDX39B/SAV1/PTCD2/MED1/WNT3A/AKAP6/PROX2/SGCB/TBX3	53
BP	GO:0061053	somite development	27|2417	75|14725	3.06963e-05	0.00239644	ENSG00000128602/ENSG00000114251/ENSG00000165556/ENSG00000138795/ENSG00000169554/ENSG00000103241/ENSG00000185920/ENSG00000054598/ENSG00000090932/ENSG00000171956/ENSG00000140807/ENSG00000104332/ENSG00000125813/ENSG00000149311/ENSG00000076356/ENSG00000069248/ENSG00000203877/ENSG00000169071/ENSG00000126778/ENSG00000176692/ENSG00000183691/ENSG00000157796/ENSG00000253729/ENSG00000164458/ENSG00000154342…	SMO/WNT5A/CDX2/LEF1/ZEB2/FOXF1/PTCH1/FOXC1/DLL3/FOXB1/NKD1/SFRP1/PAX1/ATM/PLXNA2/NUP133/RIPPLY2/ROR2/SIX1/FOXC2/NOG/WDR19/PRKDC/TBXT/WNT3A/MIB1/MEOX1	27
BP	GO:0035270	endocrine system development	37|2417	117|14725	3.38485e-05	0.00260633	ENSG00000184058/ENSG00000128602/ENSG00000106004/ENSG00000074047/ENSG00000105997/ENSG00000184486/ENSG00000128918/ENSG00000114251/ENSG00000183072/ENSG00000103449/ENSG00000016082/ENSG00000120093/ENSG00000007372/ENSG00000163623/ENSG00000184937/ENSG00000050165/ENSG00000164093/ENSG00000139515/ENSG00000178919/ENSG00000125813/ENSG00000134954/ENSG00000125820/ENSG00000173404/ENSG00000136352/ENSG00000163132…	TBX1/SMO/HOXA5/GLI2/HOXA3/POU3F2/ALDH1A2/WNT5A/NKX2-5/SALL1/ISL1/HOXB3/PAX6/NKX6-1/WT1/DKK3/PITX2/PDX1/FOXE1/PAX1/ETS1/NKX2-2/INSM1/NKX2-1/MSX1/BMP6/SIX1/PDGFRA/FOXO1/SIX3/NOG/GLI1/RFX6/ONECUT2/HOXD3/TBX19/NR5A1	37
BP	GO:0021522	spinal cord motor neuron differentiation	15|2417	31|14725	3.48795e-05	0.0026141	ENSG00000074047/ENSG00000128710/ENSG00000016082/ENSG00000007372/ENSG00000163623/ENSG00000126970/ENSG00000180818/ENSG00000205927/ENSG00000185920/ENSG00000138136/ENSG00000187240/ENSG00000164532/ENSG00000125820/ENSG00000164900/ENSG00000159556	GLI2/HOXD10/ISL1/PAX6/NKX6-1/ZC4H2/HOXC10/OLIG2/PTCH1/LBX1/DYNC2H1/TBX20/NKX2-2/GBX1/ISL2	15
BP	GO:0045880	positive regulation of smoothened signaling pathway	15|2417	31|14725	3.48795e-05	0.0026141	ENSG00000147257/ENSG00000109113/ENSG00000128602/ENSG00000072840/ENSG00000164066/ENSG00000104332/ENSG00000187240/ENSG00000168779/ENSG00000116132/ENSG00000159307/ENSG00000146197/ENSG00000102678/ENSG00000111087/ENSG00000166813/ENSG00000154309	GPC3/RAB34/SMO/EVC/INTU/SFRP1/DYNC2H1/SHOX2/PRRX1/SCUBE1/SCUBE3/FGF9/GLI1/KIF7/DISP1	15
BP	GO:0060538	skeletal muscle organ development	46|2417	158|14725	4.29015e-05	0.00317302	ENSG00000233276/ENSG00000184058/ENSG00000128602/ENSG00000128573/ENSG00000112276/ENSG00000136630/ENSG00000128710/ENSG00000179456/ENSG00000122691/ENSG00000005513/ENSG00000184937/ENSG00000128709/ENSG00000148704/ENSG00000198947/ENSG00000009709/ENSG00000081189/ENSG00000164093/ENSG00000142700/ENSG00000168779/ENSG00000154928/ENSG00000170162/ENSG00000178860/ENSG00000036448/ENSG00000239474/ENSG00000095587…	GPX1/TBX1/SMO/FOXP2/BVES/HLX/HOXD10/ZBTB18/TWIST1/SOX8/WT1/HOXD9/VAX1/DMD/PAX7/MEF2C/PITX2/DMRTA2/SHOX2/EPHB1/VGLL2/MSC/MYOM2/KLHL41/TLL2/CDON/MYH15/COL19A1/HEYL/HDAC9/CYP26B1/CNTFR/ACTA1/SIX1/MEGF10/CFL2/MSTN/MYOD1/HLF/KCNAB1/WNT10B/ATF3/DDX17/WNT3A/ZNF689/DISP1	46
BP	GO:0072073	kidney epithelium development	39|2417	127|14725	4.41197e-05	0.0032109	ENSG00000147257/ENSG00000128602/ENSG00000005073/ENSG00000125931/ENSG00000103449/ENSG00000077092/ENSG00000128713/ENSG00000185008/ENSG00000170577/ENSG00000138685/ENSG00000081181/ENSG00000145147/ENSG00000119630/ENSG00000166341/ENSG00000198914/ENSG00000005513/ENSG00000184937/ENSG00000163884/ENSG00000185920/ENSG00000054598/ENSG00000135333/ENSG00000081189/ENSG00000104313/ENSG00000126562/ENSG00000104332…	GPC3/SMO/HOXA11/CITED1/SALL1/RARB/HOXD11/ROBO2/SIX2/FGF2/ARG2/SLIT2/PGF/DCHS1/POU3F3/SOX8/WT1/KLF15/PTCH1/FOXC1/EPHA7/MEF2C/EYA1/WNK4/SFRP1/PAX2/SMAD9/KLHL3/HEYL/FAT4/BMPER/SIX1/FOXC2/PTPRO/SIM1/CD34/NOG/OSR1/NUP93	39
BP	GO:0007411	axon guidance	60|2417	223|14725	4.45561e-05	0.0032109	ENSG00000149294/ENSG00000162738/ENSG00000074047/ENSG00000143869/ENSG00000155980/ENSG00000183853/ENSG00000114251/ENSG00000010810/ENSG00000016082/ENSG00000072832/ENSG00000185008/ENSG00000007372/ENSG00000176165/ENSG00000145147/ENSG00000154134/ENSG00000065675/ENSG00000185920/ENSG00000070886/ENSG00000105880/ENSG00000148704/ENSG00000145242/ENSG00000135333/ENSG00000137285/ENSG00000075213/ENSG00000173482…	NCAM1/VANGL2/GLI2/GDF7/KIF5A/KIRREL1/WNT5A/FYN/ISL1/CRMP1/ROBO2/PAX6/FOXG1/SLIT2/ROBO3/PRKCQ/PTCH1/EPHA8/DLX5/VAX1/EPHA5/EPHA7/TUBB2B/SEMA3A/PTPRM/ETV1/EPHB1/NRP2/MYH10/RNF165/LAMA2/LHX9/NKX2-1/GAP43/HOXA2/USP33/PLXNA2/GBX1/FLRT3/UNC5C/NFASC/NRXN3/OTX2/SLIT3/GRB10/SEMA6A/ISL2/PTPRO/ATOH1/ENAH/UNC5B/NOG/SEMA6C/BOC/NTRK1/B4GAT1/PRKCA/WNT3A/FEZ1/FZD3	60
BP	GO:0042472	inner ear morphogenesis	31|2417	93|14725	4.67e-05	0.00332279	ENSG00000162738/ENSG00000184058/ENSG00000148516/ENSG00000074047/ENSG00000114251/ENSG00000105991/ENSG00000176165/ENSG00000006377/ENSG00000095777/ENSG00000105880/ENSG00000117707/ENSG00000006611/ENSG00000104313/ENSG00000077943/ENSG00000075891/ENSG00000139219/ENSG00000112320/ENSG00000116132/ENSG00000169071/ENSG00000198707/ENSG00000126778/ENSG00000136158/ENSG00000172238/ENSG00000165409/ENSG00000102678…	VANGL2/TBX1/ZEB1/GLI2/WNT5A/HOXA1/FOXG1/DLX6/MYO3A/DLX5/PROX1/USH1C/EYA1/ITGA8/PAX2/COL2A1/SOBP/PRRX1/ROR2/CEP290/SIX1/SPRY2/ATOH1/TSHR/FGF9/TMIE/HMX2/HMX3/PDZD7/WNT3A/FZD3	31
BP	GO:0060041	retina development in camera-type eye	38|2417	123|14725	4.74698e-05	0.00333535	ENSG00000050555/ENSG00000177707/ENSG00000187498/ENSG00000077092/ENSG00000007372/ENSG00000166402/ENSG00000005513/ENSG00000132386/ENSG00000117707/ENSG00000146350/ENSG00000173482/ENSG00000144061/ENSG00000075891/ENSG00000115844/ENSG00000153208/ENSG00000133026/ENSG00000150625/ENSG00000064309/ENSG00000112333/ENSG00000113966/ENSG00000139445/ENSG00000069188/ENSG00000106025/ENSG00000180376/ENSG00000134853…	LAMC3/NECTIN3/COL4A1/RARB/PAX6/TUB/SOX8/SERPINF1/PROX1/TBC1D32/PTPRM/NPHP1/PAX2/DLX2/MERTK/MYH10/GPM6A/CDON/NR2E1/ARL6/FOXN4/SDK2/TSPAN12/CCDC66/PDGFRA/RORB/NTRK2/ACVR2B/SIX3/AGTPBP1/ATP2B4/PDGFRB/SLC4A5/CELF4/MED1/RRM1/MEGF11/PDE6C	38
BP	GO:0051216	cartilage development	48|2417	168|14725	5.00893e-05	0.00347595	ENSG00000149948/ENSG00000148516/ENSG00000106004/ENSG00000074047/ENSG00000105997/ENSG00000005073/ENSG00000019549/ENSG00000114251/ENSG00000072840/ENSG00000077092/ENSG00000120093/ENSG00000170577/ENSG00000138685/ENSG00000178573/ENSG00000180318/ENSG00000110693/ENSG00000134532/ENSG00000113196/ENSG00000164107/novel.261/ENSG00000009709/ENSG00000081189/ENSG00000198353/ENSG00000168779/ENSG00000115844/ENSG0…	HMGA2/ZEB1/HOXA5/GLI2/HOXA3/HOXA11/SNAI2/WNT5A/EVC/RARB/HOXB3/SIX2/FGF2/MAF/ALX1/SOX6/SOX5/HAND1/HAND2/-/PAX7/MEF2C/HOXC4/SHOX2/DLX2/SMAD9/COL2A1/UNCX/SATB2/RFLNB/PRRX1/NKX3-2/COMP/MSX1/PKDCC/BMP6/ROR2/AC006254.1/ZBTB16/GDF6/COL27A1/NOG/FGF9/WNT10B/TMEM110-MUSTN1/HOXD3/SULF1/OSR1	48
BP	GO:0060415	muscle tissue morphogenesis	24|2417	65|14725	5.20835e-05	0.00357026	ENSG00000162738/ENSG00000184058/ENSG00000152192/ENSG00000114251/ENSG00000183072/ENSG00000069702/ENSG00000016082/ENSG00000169946/ENSG00000054598/ENSG00000117707/ENSG00000113196/ENSG00000009709/ENSG00000173706/ENSG00000164093/ENSG00000168779/ENSG00000155657/ENSG00000170989/ENSG00000164532/ENSG00000176692/ENSG00000135766/ENSG00000183691/ENSG00000065534/ENSG00000049883/ENSG00000125686	VANGL2/TBX1/POU4F1/WNT5A/NKX2-5/TGFBR3/ISL1/ZFPM2/FOXC1/PROX1/HAND1/PAX7/HEG1/PITX2/SHOX2/TTN/S1PR1/TBX20/FOXC2/EGLN1/NOG/MYLK/PTCD2/MED1	24
BP	GO:0044057	regulation of system process	104|2417	442|14725	5.66942e-05	0.0038395	ENSG00000152661/ENSG00000145362/ENSG00000182963/ENSG00000196632/ENSG00000121297/ENSG00000112276/ENSG00000184185/ENSG00000181104/ENSG00000183072/ENSG00000183873/ENSG00000087258/ENSG00000182389/ENSG00000148408/ENSG00000153956/ENSG00000183023/ENSG00000169760/ENSG00000213366/ENSG00000164107/ENSG00000198947/ENSG00000154639/ENSG00000075213/ENSG00000138193/ENSG00000116741/ENSG00000157404/ENSG00000126562…	GJA1/ANK2/GJC1/WNK3/TSHZ3/BVES/KCNJ12/F2R/NKX2-5/SCN5A/GNAO1/CACNB4/CACNA1B/CACNA2D1/SLC8A1/NLGN1/GSTM2/HAND2/DMD/CXADR/SEMA3A/PLCE1/RGS2/KIT/WNK4/CELF2/OPRD1/SPX/KCNB2/EDNRB/PARP1/ATP1B2/MYRF/TRPC3/TMEM100/SCN4B/UTRN/CACNA2D3/PRKG1/SCN3B/CHRM3/GUCY1A1/FXYD6/DOCK4/PAK1/SLC1A1/CACNG8/NLGN3/CALCRL/SSTR2/BMP6/TRPV1/CORIN/GAL/ADORA2B/APLN/FOXN4/AGTR1/RANGRF/CACNB2/CAV3/SLC8A3/SCN2B/TRPC1/HTR2C/FKBP1B…	104
BP	GO:0060485	mesenchyme development	60|2417	225|14725	5.89306e-05	0.00389705	ENSG00000149948/ENSG00000164683/ENSG00000184058/ENSG00000128602/ENSG00000106004/ENSG00000162493/ENSG00000128918/ENSG00000019549/ENSG00000114251/ENSG00000183072/ENSG00000069702/ENSG00000016082/ENSG00000137273/ENSG00000138795/ENSG00000169554/ENSG00000122691/ENSG00000170577/ENSG00000103241/ENSG00000166341/ENSG00000169946/ENSG00000005513/ENSG00000184937/ENSG00000180318/ENSG00000054598/ENSG00000090932…	HMGA2/HEY1/TBX1/SMO/HOXA5/PDPN/ALDH1A2/SNAI2/WNT5A/NKX2-5/TGFBR3/ISL1/FOXF2/LEF1/ZEB2/TWIST1/SIX2/FOXF1/DCHS1/ZFPM2/SOX8/WT1/ALX1/FOXC1/DLL3/BNC2/HAND1/HAND2/MEF2C/SEMA3A/PITX2/SFRP1/PAX2/PAX1/EDNRB/TMEM100/TBX20/RFLNB/NKX2-1/MSX1/HEYL/MIR221/DACT3/NUP133/HAS2/ACTA1/SIX1/FOXC2/HDAC2/NOG/FGF9/KBTBD8/DDX17/PDGFRB/OSR1/EDNRA/WNT3A/RGCC/RDH10/MEOX1	60
BP	GO:0097485	neuron projection guidance	60|2417	225|14725	5.89306e-05	0.00389705	ENSG00000149294/ENSG00000162738/ENSG00000074047/ENSG00000143869/ENSG00000155980/ENSG00000183853/ENSG00000114251/ENSG00000010810/ENSG00000016082/ENSG00000072832/ENSG00000185008/ENSG00000007372/ENSG00000176165/ENSG00000145147/ENSG00000154134/ENSG00000065675/ENSG00000185920/ENSG00000070886/ENSG00000105880/ENSG00000148704/ENSG00000145242/ENSG00000135333/ENSG00000137285/ENSG00000075213/ENSG00000173482…	NCAM1/VANGL2/GLI2/GDF7/KIF5A/KIRREL1/WNT5A/FYN/ISL1/CRMP1/ROBO2/PAX6/FOXG1/SLIT2/ROBO3/PRKCQ/PTCH1/EPHA8/DLX5/VAX1/EPHA5/EPHA7/TUBB2B/SEMA3A/PTPRM/ETV1/EPHB1/NRP2/MYH10/RNF165/LAMA2/LHX9/NKX2-1/GAP43/HOXA2/USP33/PLXNA2/GBX1/FLRT3/UNC5C/NFASC/NRXN3/OTX2/SLIT3/GRB10/SEMA6A/ISL2/PTPRO/ATOH1/ENAH/UNC5B/NOG/SEMA6C/BOC/NTRK1/B4GAT1/PRKCA/WNT3A/FEZ1/FZD3	60
BP	GO:0042475	odontogenesis of dentin-containing tooth	27|2417	78|14725	6.77155e-05	0.00442592	ENSG00000184058/ENSG00000128602/ENSG00000074047/ENSG00000183873/ENSG00000138795/ENSG00000054598/ENSG00000113196/ENSG00000164107/ENSG00000164093/ENSG00000140090/ENSG00000115844/ENSG00000162624/ENSG00000134569/ENSG00000104267/ENSG00000163132/ENSG00000171243/ENSG00000186951/ENSG00000178522/ENSG00000134853/ENSG00000150907/ENSG00000196591/ENSG00000091409/ENSG00000041982/ENSG00000158813/ENSG00000114739…	TBX1/SMO/GLI2/SCN5A/LEF1/FOXC1/HAND1/HAND2/PITX2/SLC24A4/DLX2/LHX8/LRP4/CA2/MSX1/SOSTDC1/PPARA/AMBN/PDGFRA/FOXO1/HDAC2/ITGA6/TNC/EDA/ACVR2B/HDAC1/DMRT3	27
BP	GO:0061138	morphogenesis of a branching epithelium	48|2417	170|14725	6.93155e-05	0.00447842	ENSG00000147257/ENSG00000162738/ENSG00000128602/ENSG00000106004/ENSG00000074047/ENSG00000159184/ENSG00000143869/ENSG00000005073/ENSG00000128714/ENSG00000125931/ENSG00000019549/ENSG00000114251/ENSG00000103449/ENSG00000187498/ENSG00000128713/ENSG00000138795/ENSG00000170577/ENSG00000138685/ENSG00000103241/ENSG00000145147/ENSG00000119630/ENSG00000166341/ENSG00000005513/ENSG00000184937/ENSG00000185920…	GPC3/VANGL2/SMO/HOXA5/GLI2/HOXB13/GDF7/HOXA11/HOXD13/CITED1/SNAI2/WNT5A/SALL1/COL4A1/HOXD11/LEF1/SIX2/FGF2/FOXF1/SLIT2/PGF/DCHS1/SOX8/WT1/PTCH1/PROX1/SEMA3A/PITX2/EYA1/SFRP1/PAX2/TBX20/PAK1/NKX2-1/FAT4/CAV3/GCM1/SIX1/FOXC2/SPRY2/TNC/NOG/SULF1/EDNRA/MED1/RDH10/CTSZ/TBX3	48
BP	GO:0042692	muscle cell differentiation	78|2417	314|14725	7.32536e-05	0.00467907	ENSG00000154277/ENSG00000233276/ENSG00000170558/ENSG00000164683/ENSG00000128591/ENSG00000184058/ENSG00000145362/ENSG00000148516/ENSG00000128602/ENSG00000162909/ENSG00000112276/ENSG00000183072/ENSG00000077092/ENSG00000138795/ENSG00000162614/ENSG00000183023/ENSG00000103241/ENSG00000135298/ENSG00000116761/ENSG00000184937/ENSG00000077522/ENSG00000110693/ENSG00000117707/ENSG00000136717/ENSG00000198947…	UCHL1/GPX1/CDH2/HEY1/FLNC/TBX1/ANK2/ZEB1/SMO/CAPN2/BVES/NKX2-5/RARB/LEF1/NEXN/SLC8A1/FOXF1/ADGRB3/CTH/WT1/ACTN2/SOX6/PROX1/BIN1/DMD/MYH3/SYNE1/MEF2C/CXADR/PITX2/KIT/ITGA8/SHOX2/EDNRB/MYH10/RAMP2/TTN/MYOM2/SORBS2/KLHL41/PAK1/CDON/MSX1/ACADM/MIR221/RORA/GLMN/HDAC9/CYP26B1/CAV3/PLPP7/ACTA1/SIX1/MEGF10/LMOD1/PDGFRA/CFL2/AVPR1A/CAMK1/MYOD1/MORF4L2/HNRNPU/BOC/WNT10B/FHOD3/PDGFRB/DDX39B/CACNA2D2/RBPMS2/…	78
BP	GO:0051962	positive regulation of nervous system development	106|2417	456|14725	8.09437e-05	0.00511218	ENSG00000165300/ENSG00000148516/ENSG00000128602/ENSG00000074047/ENSG00000196628/ENSG00000143869/ENSG00000166313/ENSG00000277586/ENSG00000181690/ENSG00000114251/ENSG00000150471/ENSG00000183072/ENSG00000010810/ENSG00000077092/ENSG00000131409/ENSG00000185008/ENSG00000169554/ENSG00000131711/ENSG00000171517/ENSG00000007372/ENSG00000176165/ENSG00000163623/ENSG00000018236/ENSG00000169760/ENSG00000135298…	SLITRK5/ZEB1/SMO/GLI2/TCF4/GDF7/APBB1/NEFL/PLAG1/WNT5A/ADGRL3/NKX2-5/FYN/RARB/LRRC4B/ROBO2/ZEB2/MAP1B/LPAR3/PAX6/FOXG1/NKX6-1/CNTN1/NLGN1/ADGRB3/SYT2/ZC4H2/SLITRK3/SLIT2/OLIG2/SOX8/LPAR1/PTPRD/SERPINF1/PROX1/BIN1/NDNF/DMD/MEF2C/TUBB2B/SEMA3A/KIT/DMRTA2/CUX2/PAX2/SHOX2/EPHB1/DLX2/BHLHB9/MYRF/SERPINE2/SERPINI1/LRRC7/NKX2-2/PAK1/CDON/NLGN3/HEYL/BMP6/ZNF804A/LTK/TP73/PRKD1/MIR221/PAK3/FLRT3/RGMA/PITX…	106
BP	GO:0048709	oligodendrocyte differentiation	28|2417	83|14725	8.4203e-05	0.00525894	ENSG00000084207/ENSG00000146122/ENSG00000007372/ENSG00000163623/ENSG00000205927/ENSG00000005513/ENSG00000198121/ENSG00000110693/ENSG00000134198/ENSG00000115844/ENSG00000124920/ENSG00000125820/ENSG00000136352/ENSG00000196338/ENSG00000078900/ENSG00000100678/ENSG00000184221/ENSG00000132970/ENSG00000106278/ENSG00000152784/ENSG00000196591/ENSG00000148053/ENSG00000123080/ENSG00000254087/ENSG00000172201…	GSTP1/DAAM2/PAX6/NKX6-1/OLIG2/SOX8/LPAR1/SOX6/TSPAN2/DLX2/MYRF/NKX2-2/NKX2-1/NLGN3/TP73/SLC8A3/OLIG1/WASF3/PTPRZ1/PRDM8/HDAC2/NTRK2/CDKN2C/LYN/ID4/ZNF488/CNTNAP1/EIF2B3	28
BP	GO:0042474	middle ear morphogenesis	11|2417	20|14725	8.97536e-05	0.00547919	ENSG00000184058/ENSG00000170577/ENSG00000104313/ENSG00000116132/ENSG00000109705/ENSG00000105996/ENSG00000163132/ENSG00000126778/ENSG00000179981/ENSG00000183691/ENSG00000143867	TBX1/SIX2/EYA1/PRRX1/NKX3-2/HOXA2/MSX1/SIX1/TSHZ1/NOG/OSR1	11
BP	GO:0043586	tongue development	11|2417	20|14725	8.97536e-05	0.00547919	ENSG00000184058/ENSG00000138795/ENSG00000173068/ENSG00000164107/ENSG00000157404/ENSG00000003137/ENSG00000126778/ENSG00000196591/ENSG00000146648/ENSG00000169884/ENSG00000116478	TBX1/LEF1/BNC2/HAND2/KIT/CYP26B1/SIX1/HDAC2/EGFR/WNT10B/HDAC1	11
BP	GO:0048644	muscle organ morphogenesis	25|2417	71|14725	9.06537e-05	0.00547919	ENSG00000162738/ENSG00000184058/ENSG00000152192/ENSG00000114251/ENSG00000183072/ENSG00000069702/ENSG00000016082/ENSG00000169946/ENSG00000054598/ENSG00000117707/ENSG00000113196/ENSG00000009709/ENSG00000173706/ENSG00000164093/ENSG00000168779/ENSG00000155657/ENSG00000170989/ENSG00000164532/ENSG00000176692/ENSG00000135766/ENSG00000242689/ENSG00000183691/ENSG00000065534/ENSG00000049883/ENSG00000125686	VANGL2/TBX1/POU4F1/WNT5A/NKX2-5/TGFBR3/ISL1/ZFPM2/FOXC1/PROX1/HAND1/PAX7/HEG1/PITX2/SHOX2/TTN/S1PR1/TBX20/FOXC2/EGLN1/CNTF/NOG/MYLK/PTCD2/MED1	25
BP	GO:0007519	skeletal muscle tissue development	43|2417	149|14725	9.38052e-05	0.00560935	ENSG00000233276/ENSG00000184058/ENSG00000128602/ENSG00000128573/ENSG00000112276/ENSG00000136630/ENSG00000128710/ENSG00000179456/ENSG00000122691/ENSG00000005513/ENSG00000128709/ENSG00000148704/ENSG00000198947/ENSG00000009709/ENSG00000081189/ENSG00000164093/ENSG00000142700/ENSG00000168779/ENSG00000154928/ENSG00000170162/ENSG00000178860/ENSG00000036448/ENSG00000239474/ENSG00000095587/ENSG00000064309…	GPX1/TBX1/SMO/FOXP2/BVES/HLX/HOXD10/ZBTB18/TWIST1/SOX8/HOXD9/VAX1/DMD/PAX7/MEF2C/PITX2/DMRTA2/SHOX2/EPHB1/VGLL2/MSC/MYOM2/KLHL41/TLL2/CDON/MYH15/COL19A1/HEYL/HDAC9/CYP26B1/ACTA1/SIX1/MEGF10/CFL2/MSTN/MYOD1/HLF/KCNAB1/WNT10B/ATF3/DDX17/WNT3A/ZNF689	43
BP	GO:0035115	embryonic forelimb morphogenesis	14|2417	30|14725	0.000104786	0.00620004	ENSG00000005073/ENSG00000128918/ENSG00000052850/ENSG00000122691/ENSG00000163064/ENSG00000128709/ENSG00000168779/ENSG00000122707/ENSG00000163132/ENSG00000103494/ENSG00000143867/ENSG00000151067/ENSG00000121039/ENSG00000135111	HOXA11/ALDH1A2/ALX4/TWIST1/EN1/HOXD9/SHOX2/RECK/MSX1/RPGRIP1L/OSR1/CACNA1C/RDH10/TBX3	14
BP	GO:0072006	nephron development	37|2417	123|14725	0.000110613	0.00642891	ENSG00000147257/ENSG00000162738/ENSG00000116962/ENSG00000128602/ENSG00000005073/ENSG00000125931/ENSG00000103449/ENSG00000128713/ENSG00000170577/ENSG00000138685/ENSG00000119630/ENSG00000166341/ENSG00000198914/ENSG00000005513/ENSG00000184937/ENSG00000163884/ENSG00000185920/ENSG00000054598/ENSG00000081189/ENSG00000104313/ENSG00000138193/ENSG00000126562/ENSG00000075891/ENSG00000146021/ENSG00000154188…	GPC3/VANGL2/NID1/SMO/HOXA11/CITED1/SALL1/HOXD11/SIX2/FGF2/PGF/DCHS1/POU3F3/SOX8/WT1/KLF15/PTCH1/FOXC1/MEF2C/EYA1/PLCE1/WNK4/PAX2/KLHL3/ANGPT1/HEYL/FAT4/SIX1/FOXC2/PDGFRA/PTPRO/CD34/NOG/PDGFRB/SULF1/OSR1/NUP93	37
BP	GO:0055001	muscle cell development	43|2417	150|14725	0.000110942	0.00642891	ENSG00000154277/ENSG00000233276/ENSG00000128591/ENSG00000145362/ENSG00000128602/ENSG00000112276/ENSG00000183072/ENSG00000138795/ENSG00000162614/ENSG00000183023/ENSG00000077522/ENSG00000117707/ENSG00000198947/ENSG00000109063/ENSG00000081189/ENSG00000154639/ENSG00000164093/ENSG00000168779/ENSG00000133026/ENSG00000131477/ENSG00000155657/ENSG00000036448/ENSG00000154556/ENSG00000239474/ENSG00000149269…	UCHL1/GPX1/FLNC/ANK2/SMO/BVES/NKX2-5/LEF1/NEXN/SLC8A1/ACTN2/PROX1/DMD/MYH3/MEF2C/CXADR/PITX2/SHOX2/MYH10/RAMP2/TTN/MYOM2/SORBS2/KLHL41/PAK1/HDAC9/CAV3/ACTA1/MEGF10/LMOD1/PDGFRA/CFL2/MYOD1/HNRNPU/WNT10B/FHOD3/PDGFRB/DDX39B/CACNA2D2/PTCD2/AKAP6/SGCB/TBX3	43
BP	GO:0001756	somitogenesis	21|2417	56|14725	0.000116441	0.00667872	ENSG00000114251/ENSG00000165556/ENSG00000138795/ENSG00000169554/ENSG00000103241/ENSG00000054598/ENSG00000090932/ENSG00000171956/ENSG00000140807/ENSG00000104332/ENSG00000125813/ENSG00000149311/ENSG00000076356/ENSG00000203877/ENSG00000169071/ENSG00000176692/ENSG00000253729/ENSG00000164458/ENSG00000154342/ENSG00000101752/ENSG00000005102	WNT5A/CDX2/LEF1/ZEB2/FOXF1/FOXC1/DLL3/FOXB1/NKD1/SFRP1/PAX1/ATM/PLXNA2/RIPPLY2/ROR2/FOXC2/PRKDC/TBXT/WNT3A/MIB1/MEOX1	21
BP	GO:0016202	regulation of striated muscle tissue development	36|2417	119|14725	0.000119842	0.00674152	ENSG00000152661/ENSG00000184058/ENSG00000183072/ENSG00000069702/ENSG00000138795/ENSG00000122691/ENSG00000138685/ENSG00000169946/ENSG00000110693/ENSG00000081189/ENSG00000168779/ENSG00000154928/ENSG00000164532/ENSG00000239474/ENSG00000149269/ENSG00000095587/ENSG00000064309/ENSG00000078900/ENSG00000143995/ENSG00000048052/ENSG00000003137/ENSG00000182533/ENSG00000126778/ENSG00000145794/ENSG00000117724…	GJA1/TBX1/NKX2-5/TGFBR3/LEF1/TWIST1/FGF2/ZFPM2/SOX6/MEF2C/SHOX2/EPHB1/TBX20/KLHL41/PAK1/TLL2/CDON/TP73/MEIS1/HDAC9/CYP26B1/CAV3/SIX1/MEGF10/CENPF/MSTN/MYOD1/NOG/FGF9/GLI1/WNT10B/DDX17/DDX39B/SAV1/WNT3A/AKAP6	36
BP	GO:0021536	diencephalon development	23|2417	64|14725	0.000119934	0.00674152	ENSG00000128602/ENSG00000074047/ENSG00000184486/ENSG00000128918/ENSG00000152192/ENSG00000114251/ENSG00000103449/ENSG00000016082/ENSG00000138795/ENSG00000169554/ENSG00000007372/ENSG00000205927/ENSG00000171956/ENSG00000075213/ENSG00000164093/ENSG00000129159/ENSG00000134954/ENSG00000136352/ENSG00000163132/ENSG00000138083/ENSG00000183691/ENSG00000111087/ENSG00000143178	SMO/GLI2/POU3F2/ALDH1A2/POU4F1/WNT5A/SALL1/ISL1/LEF1/ZEB2/PAX6/OLIG2/FOXB1/SEMA3A/PITX2/KCNC1/ETS1/NKX2-1/MSX1/SIX3/NOG/GLI1/TBX19	23
BP	GO:0055002	striated muscle cell development	40|2417	137|14725	0.000122873	0.00683832	ENSG00000154277/ENSG00000233276/ENSG00000128591/ENSG00000128602/ENSG00000112276/ENSG00000183072/ENSG00000138795/ENSG00000162614/ENSG00000183023/ENSG00000077522/ENSG00000117707/ENSG00000198947/ENSG00000109063/ENSG00000081189/ENSG00000154639/ENSG00000164093/ENSG00000168779/ENSG00000133026/ENSG00000155657/ENSG00000036448/ENSG00000154556/ENSG00000239474/ENSG00000149269/ENSG00000048052/ENSG00000182533…	UCHL1/GPX1/FLNC/SMO/BVES/NKX2-5/LEF1/NEXN/SLC8A1/ACTN2/PROX1/DMD/MYH3/MEF2C/CXADR/PITX2/SHOX2/MYH10/TTN/MYOM2/SORBS2/KLHL41/PAK1/HDAC9/CAV3/ACTA1/LMOD1/PDGFRA/CFL2/MYOD1/HNRNPU/WNT10B/FHOD3/PDGFRB/DDX39B/CACNA2D2/PTCD2/AKAP6/SGCB/TBX3	40
BP	GO:0048546	digestive tract morphogenesis	18|2417	45|14725	0.000135401	0.00746164	ENSG00000162738/ENSG00000074047/ENSG00000128714/ENSG00000136630/ENSG00000114251/ENSG00000170577/ENSG00000103241/ENSG00000081059/ENSG00000165617/ENSG00000164093/ENSG00000104332/ENSG00000168779/ENSG00000138686/ENSG00000134853/ENSG00000114739/ENSG00000111087/ENSG00000146648/ENSG00000166831	VANGL2/GLI2/HOXD13/HLX/WNT5A/SIX2/FOXF1/TCF7/DACT1/PITX2/SFRP1/SHOX2/BBS7/PDGFRA/ACVR2B/GLI1/EGFR/RBPMS2	18
BP	GO:0001945	lymph vessel development	12|2417	24|14725	0.000143822	0.00777328	ENSG00000184058/ENSG00000162493/ENSG00000037280/ENSG00000054598/ENSG00000117707/ENSG00000173706/ENSG00000183287/ENSG00000152104/ENSG00000176692/ENSG00000114739/ENSG00000071246/ENSG00000119608	TBX1/PDPN/FLT4/FOXC1/PROX1/HEG1/CCBE1/PTPN14/FOXC2/ACVR2B/VASH1/PROX2	12
BP	GO:0060343	trabecula formation	12|2417	24|14725	0.000143822	0.00777328	ENSG00000164683/ENSG00000138829/ENSG00000154734/ENSG00000183072/ENSG00000069702/ENSG00000138449/ENSG00000104332/ENSG00000087245/ENSG00000182533/ENSG00000155846/ENSG00000135766/ENSG00000169884	HEY1/FBN2/ADAMTS1/NKX2-5/TGFBR3/SLC40A1/SFRP1/MMP2/CAV3/PPARGC1B/EGLN1/WNT10B	12
BP	GO:0045665	negative regulation of neuron differentiation	51|2417	189|14725	0.000148428	0.00794584	ENSG00000114251/ENSG00000016082/ENSG00000072832/ENSG00000175745/ENSG00000007372/ENSG00000176165/ENSG00000119866/ENSG00000169760/ENSG00000145147/ENSG00000205927/ENSG00000005513/ENSG00000198597/ENSG00000198121/ENSG00000108576/ENSG00000198947/ENSG00000135333/ENSG00000138136/ENSG00000075213/ENSG00000188729/ENSG00000133104/ENSG00000115844/ENSG00000136160/ENSG00000197959/ENSG00000010319/ENSG00000134569…	WNT5A/ISL1/CRMP1/NR2F1/PAX6/FOXG1/BCL11A/NLGN1/SLIT2/OLIG2/SOX8/ZNF536/LPAR1/SLC6A4/DMD/EPHA7/LBX1/SEMA3A/OSTN/SPART/DLX2/EDNRB/DNM3/SEMA3G/LRP4/NKX2-2/NR2E1/NLGN3/HOXA2/TP73/FUOM/RGMA/MEIS1/PAQR3/GFI1/LRRK2/ISL2/HDAC2/PTPRO/CNTF/ASPM/DIXDC1/SIX3/RUFY3/THOC2/ID4/MED1/WNT3A/MIB1/CTSZ/DENND5A	51
BP	GO:0072089	stem cell proliferation	33|2417	107|14725	0.000150781	0.00799566	ENSG00000149948/ENSG00000128602/ENSG00000019549/ENSG00000114251/ENSG00000138795/ENSG00000077942/ENSG00000007372/ENSG00000176165/ENSG00000170577/ENSG00000138685/ENSG00000148704/ENSG00000134532/ENSG00000085563/ENSG00000142700/ENSG00000112333/ENSG00000206557/ENSG00000207870/ENSG00000126070/ENSG00000188906/ENSG00000116641/ENSG00000162946/ENSG00000141384/ENSG00000101882/ENSG00000174059/ENSG00000066279…	HMGA2/SMO/SNAI2/WNT5A/LEF1/FBLN1/PAX6/FOXG1/SIX2/FGF2/VAX1/SOX5/ABCB1/DMRTA2/NR2E1/TRIM71/MIR221/AGO3/LRRK2/DOCK7/DISC1/TAF4B/NKAP/CD34/ASPM/SIX3/HNRNPU/WNT10B/ID4/WNT3A/FZD3/ARIH2/TBX3	33
BP	GO:0021516	dorsal spinal cord development	10|2417	18|14725	0.000169926	0.00881977	ENSG00000143869/ENSG00000146122/ENSG00000120068/ENSG00000117707/ENSG00000138136/ENSG00000009709/ENSG00000162367/ENSG00000164853/ENSG00000112139/ENSG00000154342	GDF7/DAAM2/HOXB8/PROX1/LBX1/PAX7/TAL1/UNCX/MDGA1/WNT3A	10
BP	GO:0036303	lymph vessel morphogenesis	10|2417	18|14725	0.000169926	0.00881977	ENSG00000162493/ENSG00000037280/ENSG00000054598/ENSG00000117707/ENSG00000183287/ENSG00000152104/ENSG00000176692/ENSG00000114739/ENSG00000071246/ENSG00000119608	PDPN/FLT4/FOXC1/PROX1/CCBE1/PTPN14/FOXC2/ACVR2B/VASH1/PROX2	10
BP	GO:0048634	regulation of muscle organ development	36|2417	121|14725	0.000173738	0.00881977	ENSG00000152661/ENSG00000184058/ENSG00000183072/ENSG00000069702/ENSG00000138795/ENSG00000122691/ENSG00000138685/ENSG00000169946/ENSG00000110693/ENSG00000081189/ENSG00000168779/ENSG00000154928/ENSG00000164532/ENSG00000239474/ENSG00000149269/ENSG00000095587/ENSG00000064309/ENSG00000078900/ENSG00000143995/ENSG00000048052/ENSG00000003137/ENSG00000182533/ENSG00000126778/ENSG00000145794/ENSG00000117724…	GJA1/TBX1/NKX2-5/TGFBR3/LEF1/TWIST1/FGF2/ZFPM2/SOX6/MEF2C/SHOX2/EPHB1/TBX20/KLHL41/PAK1/TLL2/CDON/TP73/MEIS1/HDAC9/CYP26B1/CAV3/SIX1/MEGF10/CENPF/MSTN/MYOD1/NOG/FGF9/GLI1/WNT10B/DDX17/DDX39B/SAV1/WNT3A/AKAP6	36
BP	GO:1901861	regulation of muscle tissue development	36|2417	121|14725	0.000173738	0.00881977	ENSG00000152661/ENSG00000184058/ENSG00000183072/ENSG00000069702/ENSG00000138795/ENSG00000122691/ENSG00000138685/ENSG00000169946/ENSG00000110693/ENSG00000081189/ENSG00000168779/ENSG00000154928/ENSG00000164532/ENSG00000239474/ENSG00000149269/ENSG00000095587/ENSG00000064309/ENSG00000078900/ENSG00000143995/ENSG00000048052/ENSG00000003137/ENSG00000182533/ENSG00000126778/ENSG00000145794/ENSG00000117724…	GJA1/TBX1/NKX2-5/TGFBR3/LEF1/TWIST1/FGF2/ZFPM2/SOX6/MEF2C/SHOX2/EPHB1/TBX20/KLHL41/PAK1/TLL2/CDON/TP73/MEIS1/HDAC9/CYP26B1/CAV3/SIX1/MEGF10/CENPF/MSTN/MYOD1/NOG/FGF9/GLI1/WNT10B/DDX17/DDX39B/SAV1/WNT3A/AKAP6	36
BP	GO:0021517	ventral spinal cord development	17|2417	42|14725	0.000174167	0.00881977	ENSG00000074047/ENSG00000128710/ENSG00000016082/ENSG00000007372/ENSG00000163623/ENSG00000126970/ENSG00000180818/ENSG00000205927/ENSG00000185920/ENSG00000138136/ENSG00000187240/ENSG00000164532/ENSG00000125820/ENSG00000164900/ENSG00000139445/ENSG00000159556/ENSG00000064218	GLI2/HOXD10/ISL1/PAX6/NKX6-1/ZC4H2/HOXC10/OLIG2/PTCH1/LBX1/DYNC2H1/TBX20/NKX2-2/GBX1/FOXN4/ISL2/DMRT3	17
BP	GO:0060562	epithelial tube morphogenesis	74|2417	303|14725	0.000194901	0.00978162	ENSG00000152661/ENSG00000147257/ENSG00000162738/ENSG00000128602/ENSG00000106004/ENSG00000074047/ENSG00000143869/ENSG00000005073/ENSG00000125931/ENSG00000114251/ENSG00000183072/ENSG00000103449/ENSG00000187498/ENSG00000128713/ENSG00000138795/ENSG00000169554/ENSG00000122691/ENSG00000170577/ENSG00000138685/ENSG00000103241/ENSG00000145147/ENSG00000119630/ENSG00000166341/ENSG00000005513/ENSG00000184937…	GJA1/GPC3/VANGL2/SMO/HOXA5/GLI2/GDF7/HOXA11/CITED1/WNT5A/NKX2-5/SALL1/COL4A1/HOXD11/LEF1/ZEB2/TWIST1/SIX2/FGF2/FOXF1/SLIT2/PGF/DCHS1/SOX8/WT1/ALX1/PTCH1/PROX1/HAND1/HAND2/EPHA7/LBX1/CECR2/MEF2C/PITX2/EYA1/WNK4/SFRP1/PAX2/LGR5/KLHL3/BBS7/APAF1/TBX20/PAK1/TRIM71/NKX2-1/SOSTDC1/FAT4/RGMA/GLMN/FOXN4/CAV3/CEP290/SIX1/FOXC2/SPRY2/ZIC3/KIF3A/TNC/NOG/TBXT/OSR1/PRKACB/EDNRA/MED1/WNT3A/MIB1/RDH10/FZD3/CCDC…	74
BP	GO:0086019	cell-cell signaling involved in cardiac conduction	13|2417	28|14725	0.000197326	0.00979498	ENSG00000152661/ENSG00000145362/ENSG00000182963/ENSG00000183873/ENSG00000153956/ENSG00000154639/ENSG00000177098/ENSG00000166257/ENSG00000108961/ENSG00000165995/ENSG00000113569/ENSG00000151067/ENSG00000053918	GJA1/ANK2/GJC1/SCN5A/CACNA2D1/CXADR/SCN4B/SCN3B/RANGRF/CACNB2/NUP155/CACNA1C/KCNQ1	13
BP	GO:0086065	cell communication involved in cardiac conduction	19|2417	50|14725	0.000198653	0.00979498	ENSG00000152661/ENSG00000145362/ENSG00000182963/ENSG00000183873/ENSG00000153956/ENSG00000183023/ENSG00000154639/ENSG00000129244/ENSG00000177098/ENSG00000166257/ENSG00000108961/ENSG00000165995/ENSG00000119782/ENSG00000046604/ENSG00000134755/ENSG00000113569/ENSG00000075142/ENSG00000151067/ENSG00000053918	GJA1/ANK2/GJC1/SCN5A/CACNA2D1/SLC8A1/CXADR/ATP1B2/SCN4B/SCN3B/RANGRF/CACNB2/FKBP1B/DSG2/DSC2/NUP155/SRI/CACNA1C/KCNQ1	19
BP	GO:0048754	branching morphogenesis of an epithelial tube	40|2417	140|14725	0.000204459	0.00992751	ENSG00000147257/ENSG00000162738/ENSG00000128602/ENSG00000106004/ENSG00000074047/ENSG00000143869/ENSG00000005073/ENSG00000125931/ENSG00000114251/ENSG00000103449/ENSG00000187498/ENSG00000128713/ENSG00000138795/ENSG00000170577/ENSG00000138685/ENSG00000103241/ENSG00000145147/ENSG00000119630/ENSG00000166341/ENSG00000005513/ENSG00000184937/ENSG00000185920/ENSG00000164093/ENSG00000104313/ENSG00000075891…	GPC3/VANGL2/SMO/HOXA5/GLI2/GDF7/HOXA11/CITED1/WNT5A/SALL1/COL4A1/HOXD11/LEF1/SIX2/FGF2/FOXF1/SLIT2/PGF/DCHS1/SOX8/WT1/PTCH1/PITX2/EYA1/PAX2/TBX20/PAK1/NKX2-1/FAT4/CAV3/SIX1/FOXC2/SPRY2/TNC/NOG/EDNRA/MED1/RDH10/CTSZ/TBX3	40
BP	GO:0003007	heart morphogenesis	57|2417	220|14725	0.000204873	0.00992751	ENSG00000152661/ENSG00000164683/ENSG00000162738/ENSG00000154734/ENSG00000184058/ENSG00000128602/ENSG00000128918/ENSG00000019549/ENSG00000152192/ENSG00000114251/ENSG00000183072/ENSG00000069702/ENSG00000016082/ENSG00000077092/ENSG00000122691/ENSG00000103241/ENSG00000166341/ENSG00000169946/ENSG00000185920/ENSG00000054598/ENSG00000117707/ENSG00000113196/ENSG00000164107/ENSG00000138136/ENSG00000081189…	GJA1/HEY1/VANGL2/ADAMTS1/TBX1/SMO/ALDH1A2/SNAI2/POU4F1/WNT5A/NKX2-5/TGFBR3/ISL1/RARB/TWIST1/FOXF1/DCHS1/ZFPM2/PTCH1/FOXC1/PROX1/HAND1/HAND2/LBX1/MEF2C/HEG1/PITX2/EYA1/SHOX2/NRP2/BBS7/COL2A1/TTN/TMEM100/S1PR1/TBX20/MSX1/HEYL/FAT4/HAS2/FOXN4/CAV3/SIX1/FOXC2/ZIC3/EGLN1/KIF3A/NOG/SAV1/TBXT/PTCD2/MED1/WNT3A/MIB1/CCDC39/JUN/TBX3	57
BP	GO:0042733	embryonic digit morphogenesis	22|2417	62|14725	0.000206899	0.00994001	ENSG00000152661/ENSG00000074047/ENSG00000005073/ENSG00000128714/ENSG00000052850/ENSG00000114251/ENSG00000103449/ENSG00000122691/ENSG00000164066/ENSG00000164107/ENSG00000146350/ENSG00000134569/ENSG00000163132/ENSG00000169071/ENSG00000162769/ENSG00000196591/ENSG00000109906/ENSG00000183691/ENSG00000204104/ENSG00000116478/ENSG00000143867/ENSG00000135111	GJA1/GLI2/HOXA11/HOXD13/ALX4/WNT5A/SALL1/TWIST1/INTU/HAND2/TBC1D32/LRP4/MSX1/ROR2/FLVCR1/HDAC2/ZBTB16/NOG/TRAF3IP1/HDAC1/OSR1/TBX3	22
BP	GO:0007610	behavior	111|2417	493|14725	0.000214636	0.0102243	ENSG00000165300/ENSG00000154277/ENSG00000152661/ENSG00000079215/ENSG00000184058/ENSG00000169860/ENSG00000118971/ENSG00000128573/ENSG00000152192/ENSG00000120068/ENSG00000150471/ENSG00000055732/ENSG00000128710/ENSG00000010810/ENSG00000087258/ENSG00000116678/ENSG00000152495/ENSG00000145335/ENSG00000105991/ENSG00000114200/ENSG00000139910/ENSG00000148408/ENSG00000169760/ENSG00000135298/ENSG00000046889…	SLITRK5/UCHL1/GJA1/SLC1A3/TBX1/P2RY1/CCND2/FOXP2/POU4F1/HOXB8/ADGRL3/MCOLN3/HOXD10/FYN/GNAO1/LEPR/CAMK4/SNCA/HOXA1/BCHE/NOVA1/CACNA1B/NLGN1/ADGRB3/PREX2/EN1/NPTX2/HOXD9/CDH23/SERPINF1/FOXB1/SLC6A4/HAND2/DACH1/MEF2C/KIT/ITGA8/APBA2/CUX2/NPHP1/OPRD1/ETV1/MRAP2/NRGN/BHLHB9/SERPINE2/SOBP/NRXN2/TAL1/LHX8/DMBX1/GRID1/NR2E1/NKX2-1/THBS4/NLGN3/OTOG/TRPV1/GBX1/GAL/FUOM/CHRNA4/PITX3/APLN/PPARA/MEIS1/SELENO…	111
BP	GO:0042063	gliogenesis	61|2417	240|14725	0.000220983	0.0104382	ENSG00000170558/ENSG00000084207/ENSG00000169860/ENSG00000050555/ENSG00000128602/ENSG00000184486/ENSG00000181690/ENSG00000091136/ENSG00000146122/ENSG00000138795/ENSG00000185483/ENSG00000007372/ENSG00000176165/ENSG00000163623/ENSG00000205927/ENSG00000005513/ENSG00000198121/ENSG00000163884/ENSG00000110693/ENSG00000136717/ENSG00000198947/ENSG00000134198/ENSG00000075891/ENSG00000115844/ENSG00000124920…	CDH2/GSTP1/P2RY1/LAMC3/SMO/POU3F2/PLAG1/LAMB1/DAAM2/LEF1/ROR1/PAX6/FOXG1/NKX6-1/OLIG2/SOX8/LPAR1/KLF15/SOX6/BIN1/DMD/TSPAN2/PAX2/DLX2/MYRF/SERPINE2/TAL1/LAMA2/FGF5/NKX2-2/NR2E1/NKX2-1/GAP43/NLGN3/TP73/MIR221/EMX1/PITX3/ROR2/NAB1/GCM1/SLC8A3/OLIG1/WASF3/PTPRZ1/PRDM8/POU3F1/HDAC2/CSPG4/CNTF/NTRK2/NOG/CDKN2C/AFDN/EGFR/LYN/ID4/ZNF488/CNTNAP1/EIF2B3/SYNJ1	61
BP	GO:0003012	muscle system process	89|2417	380|14725	0.000223491	0.0104687	ENSG00000152661/ENSG00000169860/ENSG00000122786/ENSG00000145362/ENSG00000213949/ENSG00000182963/ENSG00000184185/ENSG00000181104/ENSG00000183072/ENSG00000183873/ENSG00000087258/ENSG00000153956/ENSG00000183023/ENSG00000081181/ENSG00000213366/ENSG00000163884/ENSG00000077522/ENSG00000108984/ENSG00000164107/ENSG00000198947/ENSG00000109063/ENSG00000081189/ENSG00000138193/ENSG00000116741/ENSG00000157404…	GJA1/P2RY1/CALD1/ANK2/ITGA1/GJC1/KCNJ12/F2R/NKX2-5/SCN5A/GNAO1/CACNA2D1/SLC8A1/ARG2/GSTM2/KLF15/ACTN2/MAP2K6/HAND2/DMD/MYH3/MEF2C/PLCE1/RGS2/KIT/SPX/KCNB2/EDNRB/PARP1/TRPC3/TTN/SCN4B/TBX20/MYOM2/SORBS2/KLHL41/UTRN/PRKG1/SCN3B/CHRM3/GUCY1A1/DOCK4/PAK1/CALCRL/SSTR2/TRPV1/ADORA2B/SCN4A/MYOT/GRIP2/CACNB2/CAV3/SLC8A3/ACTA1/SCN2B/HMOX1/FKBP1B/LMOD1/DSG2/DSC2/FOXO1/PTGS2/HDAC2/SORBS1/MSTN/NMUR1/PDE9A/MY…	89
BP	GO:0001823	mesonephros development	30|2417	96|14725	0.000228434	0.0106118	ENSG00000147257/ENSG00000128602/ENSG00000005073/ENSG00000125931/ENSG00000103449/ENSG00000077092/ENSG00000128713/ENSG00000185008/ENSG00000170577/ENSG00000138685/ENSG00000081181/ENSG00000145147/ENSG00000119630/ENSG00000166341/ENSG00000005513/ENSG00000184937/ENSG00000185920/ENSG00000054598/ENSG00000104313/ENSG00000104332/ENSG00000075891/ENSG00000120693/ENSG00000196159/ENSG00000164619/ENSG00000126778…	GPC3/SMO/HOXA11/CITED1/SALL1/RARB/HOXD11/ROBO2/SIX2/FGF2/ARG2/SLIT2/PGF/DCHS1/SOX8/WT1/PTCH1/FOXC1/EYA1/SFRP1/PAX2/SMAD9/FAT4/BMPER/SIX1/FOXC2/ZBTB16/SIM1/NOG/OSR1	30
BP	GO:0001657	ureteric bud development	29|2417	92|14725	0.000244472	0.0112637	ENSG00000147257/ENSG00000128602/ENSG00000005073/ENSG00000125931/ENSG00000103449/ENSG00000077092/ENSG00000128713/ENSG00000185008/ENSG00000170577/ENSG00000138685/ENSG00000081181/ENSG00000145147/ENSG00000119630/ENSG00000166341/ENSG00000005513/ENSG00000184937/ENSG00000185920/ENSG00000054598/ENSG00000104313/ENSG00000104332/ENSG00000075891/ENSG00000120693/ENSG00000196159/ENSG00000164619/ENSG00000126778…	GPC3/SMO/HOXA11/CITED1/SALL1/RARB/HOXD11/ROBO2/SIX2/FGF2/ARG2/SLIT2/PGF/DCHS1/SOX8/WT1/PTCH1/FOXC1/EYA1/SFRP1/PAX2/SMAD9/FAT4/BMPER/SIX1/FOXC2/SIM1/NOG/OSR1	29
BP	GO:0051963	regulation of synapse assembly	24|2417	71|14725	0.000254818	0.0115511	ENSG00000165300/ENSG00000114251/ENSG00000150471/ENSG00000131409/ENSG00000185008/ENSG00000145335/ENSG00000169760/ENSG00000135298/ENSG00000121871/ENSG00000153707/ENSG00000135333/ENSG00000081189/ENSG00000111249/ENSG00000154928/ENSG00000198908/ENSG00000196338/ENSG00000125848/ENSG00000206561/ENSG00000126778/ENSG00000152208/ENSG00000102924/ENSG00000148053/ENSG00000196083/ENSG00000198400	SLITRK5/WNT5A/ADGRL3/LRRC4B/ROBO2/SNCA/NLGN1/ADGRB3/SLITRK3/PTPRD/EPHA7/MEF2C/CUX2/EPHB1/BHLHB9/NLGN3/FLRT3/COLQ/SIX1/GRID2/CBLN1/NTRK2/IL1RAP/NTRK1	24
BP	GO:0061333	renal tubule morphogenesis	24|2417	71|14725	0.000254818	0.0115511	ENSG00000147257/ENSG00000128602/ENSG00000005073/ENSG00000125931/ENSG00000103449/ENSG00000187498/ENSG00000128713/ENSG00000170577/ENSG00000138685/ENSG00000119630/ENSG00000166341/ENSG00000005513/ENSG00000184937/ENSG00000185920/ENSG00000081189/ENSG00000104313/ENSG00000126562/ENSG00000075891/ENSG00000139292/ENSG00000146021/ENSG00000196159/ENSG00000126778/ENSG00000183691/ENSG00000143867	GPC3/SMO/HOXA11/CITED1/SALL1/COL4A1/HOXD11/SIX2/FGF2/PGF/DCHS1/SOX8/WT1/PTCH1/MEF2C/EYA1/WNK4/PAX2/LGR5/KLHL3/FAT4/SIX1/NOG/OSR1	24
BP	GO:0072132	mesenchyme morphogenesis	18|2417	47|14725	0.000259204	0.0116559	ENSG00000164683/ENSG00000019549/ENSG00000114251/ENSG00000016082/ENSG00000138795/ENSG00000122691/ENSG00000103241/ENSG00000166341/ENSG00000054598/ENSG00000166292/ENSG00000164532/ENSG00000163132/ENSG00000163909/ENSG00000143632/ENSG00000176692/ENSG00000183691/ENSG00000143867/ENSG00000154342	HEY1/SNAI2/WNT5A/ISL1/LEF1/TWIST1/FOXF1/DCHS1/FOXC1/TMEM100/TBX20/MSX1/HEYL/ACTA1/FOXC2/NOG/OSR1/WNT3A	18
BP	GO:0050808	synapse organization	66|2417	266|14725	0.000262466	0.0117089	ENSG00000165300/ENSG00000170558/ENSG00000152192/ENSG00000114251/ENSG00000150471/ENSG00000181104/ENSG00000187498/ENSG00000010810/ENSG00000131409/ENSG00000185008/ENSG00000145335/ENSG00000182389/ENSG00000169760/ENSG00000135298/ENSG00000126970/ENSG00000121871/ENSG00000144868/ENSG00000153707/ENSG00000188153/ENSG00000198689/ENSG00000135333/ENSG00000081189/ENSG00000111249/ENSG00000154928/ENSG00000176204…	SLITRK5/CDH2/POU4F1/WNT5A/ADGRL3/F2R/COL4A1/FYN/LRRC4B/ROBO2/SNCA/CACNB4/NLGN1/ADGRB3/ZC4H2/SLITRK3/TMEM108/PTPRD/COL4A5/SLC9A6/EPHA7/MEF2C/CUX2/EPHB1/LRRTM4/BHLHB9/MYH10/NRXN2/DNM3/GPM6A/DRP2/LRP4/UTRN/NLGN3/ZNF804A/PCLO/PAK3/FLRT3/NFASC/CACNB2/SDK2/NRXN3/CAPRIN2/GNPAT/LRRK2/COLQ/SIX1/GRID2/CBLN1/SPOCK2/SNCB/IL10RA/CHRNA7/CAMK1/TNC/NTRK2/MTMR2/SYBU/IL1RAP/PCDHGC4/NTRK1/SHANK1/CACNA2D2/RAPSN/WNT3…	66
BP	GO:0071230	cellular response to amino acid stimulus	21|2417	59|14725	0.000272604	0.0119224	ENSG00000148516/ENSG00000197565/ENSG00000162909/ENSG00000187498/ENSG00000010810/ENSG00000149212/ENSG00000119866/ENSG00000204262/ENSG00000087245/ENSG00000142156/ENSG00000126778/ENSG00000065150/ENSG00000134853/ENSG00000177058/ENSG00000145431/ENSG00000025039/ENSG00000148053/ENSG00000023909/ENSG00000146648/ENSG00000138668/ENSG00000133706	ZEB1/COL4A6/CAPN2/COL4A1/FYN/SESN3/BCL11A/COL5A2/MMP2/COL6A1/SIX1/IPO5/PDGFRA/SLC38A9/PDGFC/RRAGD/NTRK2/GCLM/EGFR/HNRNPD/LARS	21
BP	GO:0086012	membrane depolarization during cardiac muscle cell action potential	11|2417	22|14725	0.000273615	0.0119224	ENSG00000145362/ENSG00000183873/ENSG00000153956/ENSG00000183023/ENSG00000177098/ENSG00000166257/ENSG00000108961/ENSG00000165995/ENSG00000182533/ENSG00000149575/ENSG00000151067	ANK2/SCN5A/CACNA2D1/SLC8A1/SCN4B/SCN3B/RANGRF/CACNB2/CAV3/SCN2B/CACNA1C	11
BP	GO:0090103	cochlea morphogenesis	11|2417	22|14725	0.000273615	0.0119224	ENSG00000162738/ENSG00000184058/ENSG00000148516/ENSG00000074047/ENSG00000114251/ENSG00000105991/ENSG00000095777/ENSG00000104313/ENSG00000075891/ENSG00000126778/ENSG00000165409	VANGL2/TBX1/ZEB1/GLI2/WNT5A/HOXA1/MYO3A/EYA1/PAX2/SIX1/TSHR	11
BP	GO:0021983	pituitary gland development	15|2417	36|14725	0.000285127	0.0123285	ENSG00000074047/ENSG00000184486/ENSG00000128918/ENSG00000114251/ENSG00000103449/ENSG00000016082/ENSG00000007372/ENSG00000164093/ENSG00000134954/ENSG00000136352/ENSG00000163132/ENSG00000138083/ENSG00000183691/ENSG00000111087/ENSG00000143178	GLI2/POU3F2/ALDH1A2/WNT5A/SALL1/ISL1/PAX6/PITX2/ETS1/NKX2-1/MSX1/SIX3/NOG/GLI1/TBX19	15
BP	GO:0051961	negative regulation of nervous system development	64|2417	257|14725	0.000289779	0.0124339	ENSG00000146122/ENSG00000114251/ENSG00000016082/ENSG00000072832/ENSG00000175745/ENSG00000185008/ENSG00000143147/ENSG00000007372/ENSG00000176165/ENSG00000119866/ENSG00000163623/ENSG00000169760/ENSG00000145147/ENSG00000205927/ENSG00000005513/ENSG00000198597/ENSG00000198121/ENSG00000090932/ENSG00000148704/ENSG00000108576/ENSG00000198947/ENSG00000135333/ENSG00000138136/ENSG00000075213/ENSG00000188729…	DAAM2/WNT5A/ISL1/CRMP1/NR2F1/ROBO2/GPR161/PAX6/FOXG1/BCL11A/NKX6-1/NLGN1/SLIT2/OLIG2/SOX8/ZNF536/LPAR1/DLL3/VAX1/SLC6A4/DMD/EPHA7/LBX1/SEMA3A/OSTN/SPART/DLX2/EDNRB/DNM3/SEMA3G/LRP4/NKX2-2/NR2E1/NLGN3/HOXA2/TP73/FUOM/RGMA/PITX3/MEIS1/PAQR3/GFI1/LRRK2/ISL2/HDAC2/PTPRO/CNTF/MTMR2/ASPM/DIXDC1/HOOK3/SIX3/NOG/RUFY3/TRAF3IP1/THOC2/PRKACB/ID4/MED1/WNT3A/NEUROD2/MIB1/CTSZ/DENND5A	64
BP	GO:0072163	mesonephric epithelium development	29|2417	93|14725	0.000300322	0.0126926	ENSG00000147257/ENSG00000128602/ENSG00000005073/ENSG00000125931/ENSG00000103449/ENSG00000077092/ENSG00000128713/ENSG00000185008/ENSG00000170577/ENSG00000138685/ENSG00000081181/ENSG00000145147/ENSG00000119630/ENSG00000166341/ENSG00000005513/ENSG00000184937/ENSG00000185920/ENSG00000054598/ENSG00000104313/ENSG00000104332/ENSG00000075891/ENSG00000120693/ENSG00000196159/ENSG00000164619/ENSG00000126778…	GPC3/SMO/HOXA11/CITED1/SALL1/RARB/HOXD11/ROBO2/SIX2/FGF2/ARG2/SLIT2/PGF/DCHS1/SOX8/WT1/PTCH1/FOXC1/EYA1/SFRP1/PAX2/SMAD9/FAT4/BMPER/SIX1/FOXC2/SIM1/NOG/OSR1	29
BP	GO:0072164	mesonephric tubule development	29|2417	93|14725	0.000300322	0.0126926	ENSG00000147257/ENSG00000128602/ENSG00000005073/ENSG00000125931/ENSG00000103449/ENSG00000077092/ENSG00000128713/ENSG00000185008/ENSG00000170577/ENSG00000138685/ENSG00000081181/ENSG00000145147/ENSG00000119630/ENSG00000166341/ENSG00000005513/ENSG00000184937/ENSG00000185920/ENSG00000054598/ENSG00000104313/ENSG00000104332/ENSG00000075891/ENSG00000120693/ENSG00000196159/ENSG00000164619/ENSG00000126778…	GPC3/SMO/HOXA11/CITED1/SALL1/RARB/HOXD11/ROBO2/SIX2/FGF2/ARG2/SLIT2/PGF/DCHS1/SOX8/WT1/PTCH1/FOXC1/EYA1/SFRP1/PAX2/SMAD9/FAT4/BMPER/SIX1/FOXC2/SIM1/NOG/OSR1	29
BP	GO:0007157	heterophilic cell-cell adhesion via plasma membrane cell adhesion molecules	16|2417	40|14725	0.000315939	0.0132529	ENSG00000170558/ENSG00000177707/ENSG00000244486/ENSG00000169760/ENSG00000166341/ENSG00000153707/ENSG00000154639/ENSG00000196159/ENSG00000152208/ENSG00000175161/ENSG00000102924/ENSG00000150637/ENSG00000009694/ENSG00000161638/ENSG00000182985/ENSG00000136732	CDH2/NECTIN3/SCARF2/NLGN1/DCHS1/PTPRD/CXADR/FAT4/GRID2/CADM2/CBLN1/CD226/TENM1/ITGA5/CADM1/GYPC	16
BP	GO:0072009	nephron epithelium development	30|2417	98|14725	0.000340517	0.0141781	ENSG00000147257/ENSG00000128602/ENSG00000005073/ENSG00000125931/ENSG00000103449/ENSG00000128713/ENSG00000170577/ENSG00000138685/ENSG00000119630/ENSG00000166341/ENSG00000198914/ENSG00000005513/ENSG00000184937/ENSG00000163884/ENSG00000185920/ENSG00000054598/ENSG00000081189/ENSG00000104313/ENSG00000126562/ENSG00000075891/ENSG00000146021/ENSG00000163909/ENSG00000196159/ENSG00000126778/ENSG00000176692…	GPC3/SMO/HOXA11/CITED1/SALL1/HOXD11/SIX2/FGF2/PGF/DCHS1/POU3F3/SOX8/WT1/KLF15/PTCH1/FOXC1/MEF2C/EYA1/WNK4/PAX2/KLHL3/HEYL/FAT4/SIX1/FOXC2/PTPRO/CD34/NOG/OSR1/NUP93	30
BP	GO:0055013	cardiac muscle cell development	21|2417	60|14725	0.000355279	0.014684	ENSG00000112276/ENSG00000183072/ENSG00000162614/ENSG00000183023/ENSG00000077522/ENSG00000117707/ENSG00000154639/ENSG00000164093/ENSG00000133026/ENSG00000155657/ENSG00000154556/ENSG00000149269/ENSG00000182533/ENSG00000134853/ENSG00000153187/ENSG00000134775/ENSG00000113721/ENSG00000198563/ENSG00000151320/ENSG00000163069/ENSG00000135111	BVES/NKX2-5/NEXN/SLC8A1/ACTN2/PROX1/CXADR/PITX2/MYH10/TTN/SORBS2/PAK1/CAV3/PDGFRA/HNRNPU/FHOD3/PDGFRB/DDX39B/AKAP6/SGCB/TBX3	21
BP	GO:0035137	hindlimb morphogenesis	14|2417	33|14725	0.000362126	0.0148577	ENSG00000147257/ENSG00000052850/ENSG00000128710/ENSG00000077092/ENSG00000122691/ENSG00000128709/ENSG00000185920/ENSG00000164093/ENSG00000163132/ENSG00000103494/ENSG00000109906/ENSG00000143867/ENSG00000125686/ENSG00000135111	GPC3/ALX4/HOXD10/RARB/TWIST1/HOXD9/PTCH1/PITX2/MSX1/RPGRIP1L/ZBTB16/OSR1/MED1/TBX3	14
BP	GO:0009798	axis specification	25|2417	77|14725	0.000387071	0.0157661	ENSG00000147257/ENSG00000116729/ENSG00000128602/ENSG00000125931/ENSG00000114251/ENSG00000165556/ENSG00000007372/ENSG00000170577/ENSG00000184937/ENSG00000185920/ENSG00000164093/ENSG00000104332/ENSG00000134569/ENSG00000203877/ENSG00000165588/ENSG00000197121/ENSG00000138587/ENSG00000183337/ENSG00000081870/ENSG00000138083/ENSG00000175879/ENSG00000164458/ENSG00000158683/ENSG00000121481/ENSG00000135111	GPC3/WLS/SMO/CITED1/WNT5A/CDX2/PAX6/SIX2/WT1/PTCH1/PITX2/SFRP1/LRP4/RIPPLY2/OTX2/PGAP1/MNS1/BCOR/HSPB11/SIX3/HOXD8/TBXT/PKD1L1/RNF2/TBX3	25
BP	GO:0021549	cerebellum development	27|2417	86|14725	0.000423553	0.017128	ENSG00000128602/ENSG00000074047/ENSG00000128573/ENSG00000183873/ENSG00000018236/ENSG00000163064/ENSG00000198121/ENSG00000054598/ENSG00000117707/ENSG00000166165/ENSG00000129159/ENSG00000133026/ENSG00000135919/ENSG00000149269/ENSG00000180616/ENSG00000128881/ENSG00000103494/ENSG00000069667/ENSG00000116906/ENSG00000159131/ENSG00000152208/ENSG00000102924/ENSG00000117569/ENSG00000111087/ENSG00000135049…	SMO/GLI2/FOXP2/SCN5A/CNTN1/EN1/LPAR1/FOXC1/PROX1/CKB/KCNC1/MYH10/SERPINE2/PAK1/SSTR2/TTBK2/RPGRIP1L/RORA/GNPAT/GART/GRID2/CBLN1/PTBP2/GLI1/AGTPBP1/HNRNPD/NEUROD2	27
BP	GO:0055006	cardiac cell development	22|2417	65|14725	0.000444749	0.0178567	ENSG00000112276/ENSG00000183072/ENSG00000069702/ENSG00000162614/ENSG00000183023/ENSG00000077522/ENSG00000117707/ENSG00000154639/ENSG00000164093/ENSG00000133026/ENSG00000155657/ENSG00000154556/ENSG00000149269/ENSG00000182533/ENSG00000134853/ENSG00000153187/ENSG00000134775/ENSG00000113721/ENSG00000198563/ENSG00000151320/ENSG00000163069/ENSG00000135111	BVES/NKX2-5/TGFBR3/NEXN/SLC8A1/ACTN2/PROX1/CXADR/PITX2/MYH10/TTN/SORBS2/PAK1/CAV3/PDGFRA/HNRNPU/FHOD3/PDGFRB/DDX39B/AKAP6/SGCB/TBX3	22
BP	GO:1902742	apoptotic process involved in development	13|2417	30|14725	0.000456698	0.0178642	ENSG00000183072/ENSG00000138795/ENSG00000185008/ENSG00000145147/ENSG00000054598/ENSG00000164107/ENSG00000075891/ENSG00000184347/ENSG00000145794/ENSG00000176692/ENSG00000138083/ENSG00000149554/ENSG00000137713	NKX2-5/LEF1/ROBO2/SLIT2/FOXC1/HAND2/PAX2/SLIT3/MEGF10/FOXC2/SIX3/CHEK1/PPP2R1B	13
BP	GO:0010463	mesenchymal cell proliferation	17|2417	45|14725	0.000460828	0.0178642	ENSG00000147257/ENSG00000184058/ENSG00000148516/ENSG00000128602/ENSG00000128573/ENSG00000114251/ENSG00000170577/ENSG00000103241/ENSG00000166341/ENSG00000164107/ENSG00000168779/ENSG00000116132/ENSG00000163132/ENSG00000196159/ENSG00000126778/ENSG00000102678/ENSG00000143867	GPC3/TBX1/ZEB1/SMO/FOXP2/WNT5A/SIX2/FOXF1/DCHS1/HAND2/SHOX2/PRRX1/MSX1/FAT4/SIX1/FGF9/OSR1	17
BP	GO:0048641	regulation of skeletal muscle tissue development	17|2417	45|14725	0.000460828	0.0178642	ENSG00000184058/ENSG00000122691/ENSG00000081189/ENSG00000168779/ENSG00000154928/ENSG00000239474/ENSG00000095587/ENSG00000064309/ENSG00000048052/ENSG00000003137/ENSG00000126778/ENSG00000145794/ENSG00000138379/ENSG00000129152/ENSG00000169884/ENSG00000100201/ENSG00000154342	TBX1/TWIST1/MEF2C/SHOX2/EPHB1/KLHL41/TLL2/CDON/HDAC9/CYP26B1/SIX1/MEGF10/MSTN/MYOD1/WNT10B/DDX17/WNT3A	17
BP	GO:0086010	membrane depolarization during action potential	17|2417	45|14725	0.000460828	0.0178642	ENSG00000145362/ENSG00000183873/ENSG00000148408/ENSG00000153956/ENSG00000183023/ENSG00000136531/ENSG00000177098/ENSG00000166257/ENSG00000007314/ENSG00000108961/ENSG00000165995/ENSG00000182533/ENSG00000169432/ENSG00000149575/ENSG00000153253/ENSG00000151067/ENSG00000168356	ANK2/SCN5A/CACNA1B/CACNA2D1/SLC8A1/SCN2A/SCN4B/SCN3B/SCN4A/RANGRF/CACNB2/CAV3/SCN9A/SCN2B/SCN3A/CACNA1C/SCN11A	17
BP	GO:2000179	positive regulation of neural precursor cell proliferation	17|2417	45|14725	0.000460828	0.0178642	ENSG00000128602/ENSG00000074047/ENSG00000007372/ENSG00000176165/ENSG00000117707/ENSG00000142700/ENSG00000173404/ENSG00000064309/ENSG00000112333/ENSG00000107859/ENSG00000162946/ENSG00000066279/ENSG00000111087/ENSG00000254087/ENSG00000154342/ENSG00000104290/ENSG00000101160	SMO/GLI2/PAX6/FOXG1/PROX1/DMRTA2/INSM1/CDON/NR2E1/PITX3/DISC1/ASPM/GLI1/LYN/WNT3A/FZD3/CTSZ	17
BP	GO:0048747	muscle fiber development	18|2417	49|14725	0.000471583	0.018156	ENSG00000154277/ENSG00000233276/ENSG00000128591/ENSG00000128602/ENSG00000138795/ENSG00000162614/ENSG00000198947/ENSG00000154639/ENSG00000168779/ENSG00000155657/ENSG00000239474/ENSG00000048052/ENSG00000143632/ENSG00000129152/ENSG00000169884/ENSG00000007402/ENSG00000049883/ENSG00000163069	UCHL1/GPX1/FLNC/SMO/LEF1/NEXN/DMD/CXADR/SHOX2/TTN/KLHL41/HDAC9/ACTA1/MYOD1/WNT10B/CACNA2D2/PTCD2/SGCB	18
BP	GO:0035265	organ growth	41|2417	150|14725	0.000475128	0.018168	ENSG00000152661/ENSG00000128602/ENSG00000181690/ENSG00000136630/ENSG00000183072/ENSG00000069702/ENSG00000072840/ENSG00000077092/ENSG00000116678/ENSG00000162733/ENSG00000138685/ENSG00000169946/ENSG00000184937/ENSG00000054598/ENSG00000117707/ENSG00000108576/ENSG00000173068/ENSG00000081189/ENSG00000173706/ENSG00000188729/ENSG00000170989/ENSG00000164532/ENSG00000154556/ENSG00000149269/ENSG00000105664…	GJA1/SMO/PLAG1/HLX/NKX2-5/TGFBR3/EVC/RARB/LEPR/DDR2/FGF2/ZFPM2/WT1/FOXC1/PROX1/SLC6A4/BNC2/MEF2C/HEG1/OSTN/S1PR1/TBX20/SORBS2/PAK1/COMP/TP73/MEIS1/FLVCR1/CAV3/FOXC2/SPRY2/ACVR2B/COL27A1/NOG/FGF9/GLI1/PDGFRB/DDX39B/SAV1/CACNA2D2/AKAP6	41
BP	GO:0050678	regulation of epithelial cell proliferation	70|2417	292|14725	0.000504039	0.0191433	ENSG00000152661/ENSG00000233276/ENSG00000147257/ENSG00000184058/ENSG00000128602/ENSG00000106004/ENSG00000128573/ENSG00000091136/ENSG00000128918/ENSG00000019549/ENSG00000114251/ENSG00000037280/ENSG00000069702/ENSG00000016082/ENSG00000102755/ENSG00000183873/ENSG00000007372/ENSG00000122691/ENSG00000138685/ENSG00000119630/ENSG00000006377/ENSG00000185920/ENSG00000132386/ENSG00000105880/ENSG00000164066…	GJA1/GPX1/GPC3/TBX1/SMO/HOXA5/FOXP2/LAMB1/ALDH1A2/SNAI2/WNT5A/FLT4/TGFBR3/ISL1/FLT1/SCN5A/PAX6/TWIST1/FGF2/PGF/DLX6/PTCH1/SERPINF1/DLX5/INTU/PROX1/PPP1R16B/MEF2C/EYA1/PTPRM/SFRP1/PAX2/NRP2/EDNRB/CD109/JCAD/AKT3/THBS4/BMP6/PRKD1/TNMD/APLN/HAS2/AGTR1/TNFSF12/HMOX1/SIX1/SPARC/VASH2/KIF3A/VEGFD/STXBP4/NOG/FGF9/GLI1/EGFR/VASH1/WNT10B/BIRC5/SAV1/MIR10B/NKX2-8/SULF1/OSR1/MED1/PRKCA/WNT3A/RGCC/SIRT1/JUN	70
BP	GO:0021602	cranial nerve morphogenesis	12|2417	27|14725	0.000570541	0.0214287	ENSG00000184058/ENSG00000105997/ENSG00000105991/ENSG00000120093/ENSG00000198947/ENSG00000075213/ENSG00000075891/ENSG00000154928/ENSG00000173917/ENSG00000177301/ENSG00000126778/ENSG00000128652	TBX1/HOXA3/HOXA1/HOXB3/DMD/SEMA3A/PAX2/EPHB1/HOXB2/KCNA2/SIX1/HOXD3	12
BP	GO:0007528	neuromuscular junction development	15|2417	38|14725	0.000571838	0.0214287	ENSG00000181104/ENSG00000187498/ENSG00000182389/ENSG00000126970/ENSG00000188153/ENSG00000134569/ENSG00000152818/ENSG00000165995/ENSG00000188906/ENSG00000206561/ENSG00000126778/ENSG00000041982/ENSG00000148053/ENSG00000007402/ENSG00000165917	F2R/COL4A1/CACNB4/ZC4H2/COL4A5/LRP4/UTRN/CACNB2/LRRK2/COLQ/SIX1/TNC/NTRK2/CACNA2D2/RAPSN	15
BP	GO:0007600	sensory perception	100|2417	448|14725	0.00059181	0.0220302	ENSG00000154277/ENSG00000233276/ENSG00000079215/ENSG00000184058/ENSG00000169860/ENSG00000050555/ENSG00000182963/ENSG00000019549/ENSG00000144488/ENSG00000152192/ENSG00000120068/ENSG00000141404/ENSG00000181104/ENSG00000010810/ENSG00000138795/ENSG00000105991/ENSG00000185483/ENSG00000007372/ENSG00000135903/ENSG00000166402/ENSG00000105928/ENSG00000112319/ENSG00000107736/ENSG00000095777/ENSG00000006611…	UCHL1/GPX1/SLC1A3/TBX1/P2RY1/LAMC3/GJC1/SNAI2/ESPNL/POU4F1/HOXB8/GNAL/F2R/FYN/LEF1/HOXA1/ROR1/PAX6/PAX3/TUB/GSDME/EYA4/CDH23/MYO3A/USH1C/MME/EYA1/KIT/OPRD1/PAX2/SPX/PIEZO2/SLC24A4/EPHB1/EDNRB/BBS7/ABLIM1/SERPINE2/COL2A1/SOBP/REEP2/TMEM100/AOC2/SCN3B/NR2E1/GJA3/OTOG/ARL6/TRPV1/GBX1/CHRNA4/CYP4V2/TRPA1/FAM161A/ZIC2/KCNA2/COCH/CACNB2/RABGGTB/SCN9A/LRIT3/SIX1/PGAP1/SPRY2/CCDC66/DNM1/EYS/POU6F2/OPN1SW…	100
BP	GO:1901342	regulation of vasculature development	67|2417	279|14725	0.000624762	0.0229611	ENSG00000149948/ENSG00000134871/ENSG00000164683/ENSG00000126016/ENSG00000106004/ENSG00000196628/ENSG00000114251/ENSG00000016082/ENSG00000102755/ENSG00000122691/ENSG00000138685/ENSG00000166501/ENSG00000135298/ENSG00000119630/ENSG00000116761/ENSG00000184937/ENSG00000132386/ENSG00000054598/ENSG00000101445/ENSG00000157404/ENSG00000173482/ENSG00000104332/ENSG00000101017/ENSG00000134954/ENSG00000131477…	HMGA2/COL4A2/HEY1/AMOT/HOXA5/TCF4/WNT5A/ISL1/FLT1/TWIST1/FGF2/PRKCB/ADGRB3/PGF/CTH/WT1/SERPINF1/FOXC1/PPP1R16B/KIT/PTPRM/SFRP1/CD40/ETS1/RAMP2/TMEM100/JCAD/SPINK5/AKT3/NR2E1/THBS4/PRKD1/MIR221/ADGRA2/TNMD/HDAC9/PTGIS/AGTR1/TNFSF12/DDAH1/TSPAN12/CCBE1/HMOX1/SPARC/FOXC2/SPRY2/SEMA6A/VASH2/AQP1/PTGS2/EGLN1/CHRNA7/VEGFD/PROK2/CD34/ITGA5/UTS2R/BRCA1/VASH1/MIR10B/SULF1/FOXO4/PRKCA/RGCC/ENPP2/MIR196A1/S…	67
BP	GO:0010721	negative regulation of cell development	66|2417	274|14725	0.000626269	0.0229611	ENSG00000146122/ENSG00000114251/ENSG00000016082/ENSG00000072832/ENSG00000175745/ENSG00000077942/ENSG00000007372/ENSG00000176165/ENSG00000119866/ENSG00000163623/ENSG00000169760/ENSG00000145147/ENSG00000205927/ENSG00000005513/ENSG00000198597/ENSG00000198121/ENSG00000090932/ENSG00000148704/ENSG00000108576/ENSG00000198947/ENSG00000135333/ENSG00000138136/ENSG00000075213/ENSG00000188729/ENSG00000133104…	DAAM2/WNT5A/ISL1/CRMP1/NR2F1/FBLN1/PAX6/FOXG1/BCL11A/NKX6-1/NLGN1/SLIT2/OLIG2/SOX8/ZNF536/LPAR1/DLL3/VAX1/SLC6A4/DMD/EPHA7/LBX1/SEMA3A/OSTN/SPART/DLX2/EDNRB/DNM3/SEMA3G/LRP4/NKX2-2/RFLNB/PAK1/NR2E1/NLGN3/HOXA2/TP73/TRPV1/GAL/FUOM/RGMA/PITX3/MEIS1/PAQR3/GFI1/CAV3/LRRK2/ISL2/HDAC2/PTPRO/CNTF/CLDN18/ASPM/DIXDC1/HOOK3/SIX3/NOG/RUFY3/THOC2/FBN1/ID4/MED1/WNT3A/MIB1/CTSZ/DENND5A	66
BP	GO:0003013	circulatory system process	101|2417	454|14725	0.000629072	0.0229611	ENSG00000152661/ENSG00000233276/ENSG00000169860/ENSG00000145362/ENSG00000213949/ENSG00000182963/ENSG00000112276/ENSG00000184185/ENSG00000181104/ENSG00000183072/ENSG00000183873/ENSG00000087258/ENSG00000182389/ENSG00000148408/ENSG00000153956/ENSG00000183023/ENSG00000099139/ENSG00000145147/ENSG00000007171/ENSG00000213366/ENSG00000108984/ENSG00000054598/ENSG00000061918/ENSG00000108576/ENSG00000198947…	GJA1/GPX1/P2RY1/ANK2/ITGA1/GJC1/BVES/KCNJ12/F2R/NKX2-5/SCN5A/GNAO1/CACNB4/CACNA1B/CACNA2D1/SLC8A1/PCSK5/SLIT2/NOS2/GSTM2/MAP2K6/FOXC1/GUCY1B1/SLC6A4/DMD/MME/CXADR/HEG1/SEMA3A/RGS2/CELF2/PTPRM/SPX/EDNRB/TRHDE/ATP1B2/RAMP2/TTN/SCN4B/TBX20/GNB3/CACNA2D3/PRKG1/SCN3B/CHRM3/WDR35/GUCY1A1/FXYD6/DOCK4/SLC1A1/CACNG8/ANGPT1/HOXB2/CORIN/ADORA2B/APLN/PPARA/FOXN4/GRIP2/AGTR1/RANGRF/CACNB2/CAV3/SLC8A3/DDAH1/FL…	101
BP	GO:0007416	synapse assembly	36|2417	129|14725	0.000673067	0.0244084	ENSG00000165300/ENSG00000170558/ENSG00000152192/ENSG00000114251/ENSG00000150471/ENSG00000131409/ENSG00000185008/ENSG00000145335/ENSG00000169760/ENSG00000135298/ENSG00000121871/ENSG00000153707/ENSG00000135333/ENSG00000081189/ENSG00000111249/ENSG00000154928/ENSG00000198908/ENSG00000110076/ENSG00000197959/ENSG00000150625/ENSG00000134569/ENSG00000196338/ENSG00000186472/ENSG00000125848/ENSG00000069188…	SLITRK5/CDH2/POU4F1/WNT5A/ADGRL3/LRRC4B/ROBO2/SNCA/NLGN1/ADGRB3/SLITRK3/PTPRD/EPHA7/MEF2C/CUX2/EPHB1/BHLHB9/NRXN2/DNM3/GPM6A/LRP4/NLGN3/PCLO/FLRT3/SDK2/NRXN3/GNPAT/COLQ/SIX1/GRID2/CBLN1/SPOCK2/NTRK2/IL1RAP/NTRK1/WNT3A	36
BP	GO:0021987	cerebral cortex development	32|2417	111|14725	0.000713261	0.0257003	ENSG00000170558/ENSG00000128602/ENSG00000128573/ENSG00000277586/ENSG00000184486/ENSG00000091136/ENSG00000007372/ENSG00000176165/ENSG00000145147/ENSG00000198914/ENSG00000198947/ENSG00000075213/ENSG00000142700/ENSG00000170370/ENSG00000064309/ENSG00000112333/ENSG00000136352/ENSG00000196159/ENSG00000135638/ENSG00000172728/ENSG00000159131/ENSG00000122585/ENSG00000172238/ENSG00000148053/ENSG00000066279…	CDH2/SMO/FOXP2/NEFL/POU3F2/LAMB1/PAX6/FOXG1/SLIT2/POU3F3/DMD/SEMA3A/DMRTA2/EMX2/CDON/NR2E1/NKX2-1/FAT4/EMX1/FUT10/GART/NPY/ATOH1/NTRK2/ASPM/DIXDC1/AFDN/EGFR/GNG12/HTR6/EFHC1/MCPH1	32
BP	GO:0008015	blood circulation	100|2417	451|14725	0.000751254	0.0268968	ENSG00000152661/ENSG00000233276/ENSG00000169860/ENSG00000145362/ENSG00000213949/ENSG00000182963/ENSG00000112276/ENSG00000184185/ENSG00000181104/ENSG00000183072/ENSG00000183873/ENSG00000087258/ENSG00000182389/ENSG00000148408/ENSG00000153956/ENSG00000183023/ENSG00000099139/ENSG00000145147/ENSG00000007171/ENSG00000213366/ENSG00000108984/ENSG00000054598/ENSG00000061918/ENSG00000108576/ENSG00000198947…	GJA1/GPX1/P2RY1/ANK2/ITGA1/GJC1/BVES/KCNJ12/F2R/NKX2-5/SCN5A/GNAO1/CACNB4/CACNA1B/CACNA2D1/SLC8A1/PCSK5/SLIT2/NOS2/GSTM2/MAP2K6/FOXC1/GUCY1B1/SLC6A4/DMD/MME/CXADR/SEMA3A/RGS2/CELF2/PTPRM/SPX/EDNRB/TRHDE/ATP1B2/RAMP2/TTN/SCN4B/TBX20/GNB3/CACNA2D3/PRKG1/SCN3B/CHRM3/WDR35/GUCY1A1/FXYD6/DOCK4/SLC1A1/CACNG8/ANGPT1/HOXB2/CORIN/ADORA2B/APLN/PPARA/FOXN4/GRIP2/AGTR1/RANGRF/CACNB2/CAV3/SLC8A3/DDAH1/FLI1/SC…	100
BP	GO:0048592	eye morphogenesis	36|2417	130|14725	0.000786355	0.0279753	ENSG00000138829/ENSG00000148516/ENSG00000177707/ENSG00000114251/ENSG00000077092/ENSG00000137273/ENSG00000007372/ENSG00000122691/ENSG00000005513/ENSG00000117707/ENSG00000204262/ENSG00000140807/ENSG00000164093/ENSG00000173482/ENSG00000075891/ENSG00000154928/ENSG00000117122/ENSG00000064309/ENSG00000113966/ENSG00000107859/ENSG00000143995/ENSG00000139445/ENSG00000069188/ENSG00000106025/ENSG00000198707…	FBN2/ZEB1/NECTIN3/WNT5A/RARB/FOXF2/PAX6/TWIST1/SOX8/PROX1/COL5A2/NKD1/PITX2/PTPRM/PAX2/EPHB1/MFAP2/CDON/ARL6/PITX3/MEIS1/FOXN4/SDK2/TSPAN12/CEP290/CCDC66/RORB/CNTF/NTRK2/SIX3/AGTPBP1/FBN1/MEGF11/PROX2/PDE6C/COL8A1	36
BP	GO:0032835	glomerulus development	19|2417	55|14725	0.000803231	0.028396	ENSG00000162738/ENSG00000116962/ENSG00000184937/ENSG00000163884/ENSG00000054598/ENSG00000081189/ENSG00000138193/ENSG00000075891/ENSG00000154188/ENSG00000163909/ENSG00000176692/ENSG00000134853/ENSG00000151490/ENSG00000174059/ENSG00000183691/ENSG00000113721/ENSG00000137573/ENSG00000143867/ENSG00000102900	VANGL2/NID1/WT1/KLF15/FOXC1/MEF2C/PLCE1/PAX2/ANGPT1/HEYL/FOXC2/PDGFRA/PTPRO/CD34/NOG/PDGFRB/SULF1/OSR1/NUP93	19
BP	GO:0001101	response to acid chemical	72|2417	307|14725	0.000816652	0.02869	ENSG00000085662/ENSG00000152661/ENSG00000084207/ENSG00000162409/ENSG00000184058/ENSG00000148516/ENSG00000197565/ENSG00000128918/ENSG00000162909/ENSG00000114251/ENSG00000187498/ENSG00000069702/ENSG00000010810/ENSG00000149212/ENSG00000129596/ENSG00000114200/ENSG00000119866/ENSG00000185920/ENSG00000132386/ENSG00000108576/ENSG00000204262/ENSG00000198947/ENSG00000186469/ENSG00000104332/ENSG00000075891…	AKR1B1/GJA1/GSTP1/PRKAA2/TBX1/ZEB1/COL4A6/ALDH1A2/CAPN2/WNT5A/COL4A1/TGFBR3/FYN/SESN3/CDO1/BCHE/BCL11A/PTCH1/SERPINF1/SLC6A4/COL5A2/DMD/GNG2/SFRP1/PAX2/MMP2/GLDC/CYP2E1/HOXA2/BMP6/LTK/CYP26B1/TNFSF4/COL6A1/GNPAT/DHFR/PTGFR/SIX1/SPARC/IPO5/AQP1/PDGFRA/SLC38A9/RORB/FOXO1/PTGS2/HDAC2/AVPR1A/TOMM20/PDGFC/RRAGD/FABP3/TNC/NTRK2/GCLM/TBXAS1/EGFR/WNT10B/ATP2B4/NTRK1/PDGFRB/FZD10/TBXT/HNRNPD/OSR1/LYN/WNT3…	72
BP	GO:0021772	olfactory bulb development	13|2417	32|14725	0.000959374	0.0330942	ENSG00000114251/ENSG00000103449/ENSG00000185008/ENSG00000145147/ENSG00000105880/ENSG00000075213/ENSG00000115844/ENSG00000164853/ENSG00000112333/ENSG00000103494/ENSG00000188906/ENSG00000095713/ENSG00000135049	WNT5A/SALL1/ROBO2/SLIT2/DLX5/SEMA3A/DLX2/UNCX/NR2E1/RPGRIP1L/LRRK2/CRTAC1/AGTPBP1	13
BP	GO:0098815	modulation of excitatory postsynaptic potential	13|2417	32|14725	0.000959374	0.0330942	ENSG00000169760/ENSG00000144868/ENSG00000111249/ENSG00000196338/ENSG00000176406/ENSG00000188906/ENSG00000166664/ENSG00000102924/ENSG00000175344/ENSG00000087053/ENSG00000161681/ENSG00000101489/ENSG00000079841	NLGN1/TMEM108/CUX2/NLGN3/RIMS2/LRRK2/CHRFAM7A/CBLN1/CHRNA7/MTMR2/SHANK1/CELF4/RIMS1	13
BP	GO:0050768	negative regulation of neurogenesis	58|2417	238|14725	0.00096015	0.0330942	ENSG00000146122/ENSG00000114251/ENSG00000016082/ENSG00000072832/ENSG00000175745/ENSG00000007372/ENSG00000176165/ENSG00000119866/ENSG00000163623/ENSG00000169760/ENSG00000145147/ENSG00000205927/ENSG00000005513/ENSG00000198597/ENSG00000198121/ENSG00000090932/ENSG00000148704/ENSG00000108576/ENSG00000198947/ENSG00000135333/ENSG00000138136/ENSG00000075213/ENSG00000188729/ENSG00000133104/ENSG00000115844…	DAAM2/WNT5A/ISL1/CRMP1/NR2F1/PAX6/FOXG1/BCL11A/NKX6-1/NLGN1/SLIT2/OLIG2/SOX8/ZNF536/LPAR1/DLL3/VAX1/SLC6A4/DMD/EPHA7/LBX1/SEMA3A/OSTN/SPART/DLX2/EDNRB/DNM3/SEMA3G/LRP4/NKX2-2/NR2E1/NLGN3/HOXA2/TP73/FUOM/RGMA/PITX3/MEIS1/PAQR3/GFI1/LRRK2/ISL2/HDAC2/PTPRO/CNTF/ASPM/DIXDC1/HOOK3/SIX3/NOG/RUFY3/THOC2/ID4/MED1/WNT3A/MIB1/CTSZ/DENND5A	58
BP	GO:0050769	positive regulation of neurogenesis	91|2417	407|14725	0.000965567	0.0330942	ENSG00000148516/ENSG00000128602/ENSG00000074047/ENSG00000196628/ENSG00000143869/ENSG00000166313/ENSG00000277586/ENSG00000181690/ENSG00000114251/ENSG00000183072/ENSG00000010810/ENSG00000077092/ENSG00000185008/ENSG00000169554/ENSG00000131711/ENSG00000171517/ENSG00000007372/ENSG00000176165/ENSG00000163623/ENSG00000018236/ENSG00000169760/ENSG00000143858/ENSG00000126970/ENSG00000145147/ENSG00000205927…	ZEB1/SMO/GLI2/TCF4/GDF7/APBB1/NEFL/PLAG1/WNT5A/NKX2-5/FYN/RARB/ROBO2/ZEB2/MAP1B/LPAR3/PAX6/FOXG1/NKX6-1/CNTN1/NLGN1/SYT2/ZC4H2/SLIT2/OLIG2/SOX8/LPAR1/PTPRD/SERPINF1/PROX1/BIN1/NDNF/DMD/MEF2C/TUBB2B/SEMA3A/KIT/DMRTA2/CUX2/SHOX2/DLX2/BHLHB9/SERPINE2/SERPINI1/LRRC7/NKX2-2/PAK1/CDON/HEYL/BMP6/ZNF804A/LTK/TP73/PRKD1/MIR221/PAK3/RGMA/RIMS2/CAPRIN2/SPEN/DISC1/FKBP1B/P3H1/SEMA6A/HDAC2/ATOH1/CAMK1/GDF6/CN…	91
BP	GO:0003206	cardiac chamber morphogenesis	32|2417	113|14725	0.000995456	0.0334998	ENSG00000164683/ENSG00000162738/ENSG00000154734/ENSG00000184058/ENSG00000128602/ENSG00000152192/ENSG00000114251/ENSG00000183072/ENSG00000069702/ENSG00000016082/ENSG00000077092/ENSG00000103241/ENSG00000169946/ENSG00000054598/ENSG00000117707/ENSG00000113196/ENSG00000164107/ENSG00000081189/ENSG00000173706/ENSG00000164093/ENSG00000168779/ENSG00000118257/ENSG00000164532/ENSG00000163909/ENSG00000182533…	HEY1/VANGL2/ADAMTS1/TBX1/SMO/POU4F1/WNT5A/NKX2-5/TGFBR3/ISL1/RARB/FOXF1/ZFPM2/FOXC1/PROX1/HAND1/HAND2/MEF2C/HEG1/PITX2/SHOX2/NRP2/TBX20/HEYL/CAV3/FOXC2/EGLN1/NOG/SAV1/PTCD2/MED1/TBX3	32
BP	GO:0086014	atrial cardiac muscle cell action potential	9|2417	18|14725	0.00100124	0.0334998	ENSG00000152661/ENSG00000145362/ENSG00000182963/ENSG00000183873/ENSG00000166257/ENSG00000165995/ENSG00000113569/ENSG00000151067/ENSG00000053918	GJA1/ANK2/GJC1/SCN5A/SCN3B/CACNB2/NUP155/CACNA1C/KCNQ1	9
BP	GO:0086026	atrial cardiac muscle cell to AV node cell signaling	9|2417	18|14725	0.00100124	0.0334998	ENSG00000152661/ENSG00000145362/ENSG00000182963/ENSG00000183873/ENSG00000166257/ENSG00000165995/ENSG00000113569/ENSG00000151067/ENSG00000053918	GJA1/ANK2/GJC1/SCN5A/SCN3B/CACNB2/NUP155/CACNA1C/KCNQ1	9
BP	GO:0086066	atrial cardiac muscle cell to AV node cell communication	9|2417	18|14725	0.00100124	0.0334998	ENSG00000152661/ENSG00000145362/ENSG00000182963/ENSG00000183873/ENSG00000166257/ENSG00000165995/ENSG00000113569/ENSG00000151067/ENSG00000053918	GJA1/ANK2/GJC1/SCN5A/SCN3B/CACNB2/NUP155/CACNA1C/KCNQ1	9
BP	GO:0055008	cardiac muscle tissue morphogenesis	19|2417	56|14725	0.00103119	0.034133	ENSG00000152192/ENSG00000114251/ENSG00000183072/ENSG00000069702/ENSG00000016082/ENSG00000169946/ENSG00000054598/ENSG00000117707/ENSG00000113196/ENSG00000173706/ENSG00000164093/ENSG00000155657/ENSG00000170989/ENSG00000164532/ENSG00000176692/ENSG00000135766/ENSG00000183691/ENSG00000049883/ENSG00000125686	POU4F1/WNT5A/NKX2-5/TGFBR3/ISL1/ZFPM2/FOXC1/PROX1/HAND1/HEG1/PITX2/TTN/S1PR1/TBX20/FOXC2/EGLN1/NOG/PTCD2/MED1	19
BP	GO:0017145	stem cell division	14|2417	36|14725	0.00103231	0.034133	ENSG00000147889/ENSG00000162738/ENSG00000138795/ENSG00000182742/ENSG00000119715/ENSG00000134532/ENSG00000213626/ENSG00000157404/ENSG00000116641/ENSG00000109906/ENSG00000066279/ENSG00000125676/ENSG00000163938/ENSG00000154342	CDKN2A/VANGL2/LEF1/HOXB4/ESRRB/SOX5/LBH/KIT/DOCK7/ZBTB16/ASPM/THOC2/GNL3/WNT3A	14
BP	GO:0045765	regulation of angiogenesis	62|2417	259|14725	0.00106137	0.0346804	ENSG00000149948/ENSG00000134871/ENSG00000126016/ENSG00000106004/ENSG00000196628/ENSG00000114251/ENSG00000016082/ENSG00000102755/ENSG00000122691/ENSG00000138685/ENSG00000166501/ENSG00000135298/ENSG00000119630/ENSG00000132386/ENSG00000054598/ENSG00000101445/ENSG00000173482/ENSG00000104332/ENSG00000101017/ENSG00000134954/ENSG00000131477/ENSG00000165757/ENSG00000133710/ENSG00000117020/ENSG00000112333…	HMGA2/COL4A2/AMOT/HOXA5/TCF4/WNT5A/ISL1/FLT1/TWIST1/FGF2/PRKCB/ADGRB3/PGF/SERPINF1/FOXC1/PPP1R16B/PTPRM/SFRP1/CD40/ETS1/RAMP2/JCAD/SPINK5/AKT3/NR2E1/THBS4/PRKD1/MIR221/ADGRA2/TNMD/HDAC9/PTGIS/AGTR1/TNFSF12/DDAH1/TSPAN12/CCBE1/HMOX1/SPARC/FOXC2/SPRY2/SEMA6A/VASH2/AQP1/PTGS2/EGLN1/CHRNA7/VEGFD/PROK2/CD34/ITGA5/UTS2R/BRCA1/VASH1/MIR10B/SULF1/FOXO4/PRKCA/RGCC/ENPP2/MIR196A1/SIRT1	62
BP	GO:0021846	cell proliferation in forebrain	11|2417	25|14725	0.00107123	0.0346804	ENSG00000159217/ENSG00000184486/ENSG00000169554/ENSG00000198914/ENSG00000170370/ENSG00000116641/ENSG00000150764/ENSG00000168172/ENSG00000138083/ENSG00000167325/ENSG00000154342	IGF2BP1/POU3F2/ZEB2/POU3F3/EMX2/DOCK7/DIXDC1/HOOK3/SIX3/RRM1/WNT3A	11
BP	GO:0021904	dorsal/ventral neural tube patterning	11|2417	25|14725	0.00107123	0.0346804	ENSG00000128602/ENSG00000074047/ENSG00000143147/ENSG00000185920/ENSG00000009709/ENSG00000146350/ENSG00000131437/ENSG00000157796/ENSG00000204104/ENSG00000142875/ENSG00000154342	SMO/GLI2/GPR161/PTCH1/PAX7/TBC1D32/KIF3A/WDR19/TRAF3IP1/PRKACB/WNT3A	11
BP	GO:0060348	bone development	45|2417	175|14725	0.00107354	0.0346804	ENSG00000102024/ENSG00000005073/ENSG00000077092/ENSG00000122691/ENSG00000166341/ENSG00000182742/ENSG00000197467/ENSG00000054598/ENSG00000105880/ENSG00000081189/ENSG00000164093/ENSG00000157404/ENSG00000125813/ENSG00000168779/ENSG00000120693/ENSG00000174705/ENSG00000128606/ENSG00000139219/ENSG00000162367/ENSG00000183688/ENSG00000105664/ENSG00000162551/ENSG00000163132/ENSG00000153162/ENSG00000196159…	PLS3/HOXA11/RARB/TWIST1/DCHS1/HOXB4/COL13A1/FOXC1/DLX5/MEF2C/PITX2/KIT/PAX1/SHOX2/SMAD9/SH3PXD2B/LRRC17/COL2A1/TAL1/RFLNB/COMP/ALPL/MSX1/BMP6/FAT4/RIPPLY2/MEIS1/HAS2/CYP26B1/NAB1/FLI1/SPARC/P3H1/PDGFC/CLDN18/COL27A1/SLC9B2/TBXT/SULF1/RAB23/FBN1/MED1/BBX/FOXN3/MCPH1	45
BP	GO:0021915	neural tube development	41|2417	156|14725	0.00111084	0.0355067	ENSG00000162738/ENSG00000128602/ENSG00000074047/ENSG00000143869/ENSG00000128918/ENSG00000114251/ENSG00000169554/ENSG00000143147/ENSG00000007372/ENSG00000122691/ENSG00000166341/ENSG00000081059/ENSG00000163064/ENSG00000180318/ENSG00000165617/ENSG00000185920/ENSG00000171956/ENSG00000164066/ENSG00000117707/ENSG00000099954/ENSG00000009709/ENSG00000146350/ENSG00000104332/ENSG00000075891/ENSG00000120868…	VANGL2/SMO/GLI2/GDF7/ALDH1A2/WNT5A/ZEB2/GPR161/PAX6/TWIST1/DCHS1/TCF7/EN1/ALX1/DACT1/PTCH1/FOXB1/INTU/PROX1/CECR2/PAX7/TBC1D32/SFRP1/PAX2/APAF1/TRIM71/PLXNA2/NUP133/RGMA/RPGRIP1L/GLMN/KIF3A/NOG/WDR19/TRAF3IP1/SALL2/TBXT/PRKACB/WNT3A/MIB1/FZD3	41
BP	GO:0060541	respiratory system development	47|2417	185|14725	0.00111176	0.0355067	ENSG00000147257/ENSG00000162738/ENSG00000106004/ENSG00000074047/ENSG00000128573/ENSG00000162493/ENSG00000128918/ENSG00000114251/ENSG00000037280/ENSG00000138795/ENSG00000103241/ENSG00000169946/ENSG00000184937/ENSG00000105880/ENSG00000117707/ENSG00000087116/ENSG00000173706/ENSG00000164093/ENSG00000178860/ENSG00000113083/ENSG00000136352/ENSG00000162878/ENSG00000103494/ENSG00000183287/ENSG00000126778…	GPC3/VANGL2/HOXA5/GLI2/FOXP2/PDPN/ALDH1A2/WNT5A/FLT4/LEF1/FOXF1/ZFPM2/WT1/DLX5/PROX1/ADAMTS2/HEG1/PITX2/MSC/LOX/NKX2-1/PKDCC/RPGRIP1L/CCBE1/SIX1/SPARC/SPRY2/ZIC3/PDGFRA/TNC/EDA/ACVR2B/HSPB11/NOG/FGF9/GLI1/EGFR/KCNAB1/PDGFRB/SAV1/NKX2-8/LIPA/RDH10/AARD/CCDC39/CTSZ/DISP1	47
BP	GO:0036342	post-anal tail morphogenesis	8|2417	15|14725	0.00112578	0.0356904	ENSG00000162738/ENSG00000114251/ENSG00000166341/ENSG00000203877/ENSG00000204104/ENSG00000164458/ENSG00000154342/ENSG00000104290	VANGL2/WNT5A/DCHS1/RIPPLY2/TRAF3IP1/TBXT/WNT3A/FZD3	8
BP	GO:0060560	developmental growth involved in morphogenesis	50|2417	200|14725	0.0011535	0.0356904	ENSG00000162738/ENSG00000128714/ENSG00000114251/ENSG00000103449/ENSG00000124785/ENSG00000169554/ENSG00000131711/ENSG00000171517/ENSG00000119866/ENSG00000163623/ENSG00000143858/ENSG00000145147/ENSG00000158321/ENSG00000144868/ENSG00000198689/ENSG00000140807/ENSG00000135333/ENSG00000075213/ENSG00000188729/ENSG00000133104/ENSG00000104332/ENSG00000118257/ENSG00000143032/ENSG00000170989/ENSG00000107295…	VANGL2/HOXD13/WNT5A/SALL1/NRN1/ZEB2/MAP1B/LPAR3/BCL11A/NKX6-1/SYT2/SLIT2/AUTS2/TMEM108/SLC9A6/NKD1/EPHA7/SEMA3A/OSTN/SPART/SFRP1/NRP2/BARHL2/S1PR1/SH3GL2/SEMA3G/PAK1/NLGN3/PLXNA2/GAL/WASF1/FLRT3/RGMA/EMX1/RIMS2/SLIT3/SIX1/SPRY2/C9orf72/TNC/SYT17/RUFY3/RIMS1/VCL/TTL/MED1/WNT3A/RDH10/USP9X/PRKN	50
BP	GO:0001936	regulation of endothelial cell proliferation	32|2417	114|14725	0.00117	0.0356904	ENSG00000152661/ENSG00000128918/ENSG00000114251/ENSG00000037280/ENSG00000102755/ENSG00000138685/ENSG00000119630/ENSG00000117707/ENSG00000101445/ENSG00000081189/ENSG00000173482/ENSG00000118257/ENSG00000165757/ENSG00000117020/ENSG00000113296/ENSG00000153162/ENSG00000184304/ENSG00000000005/ENSG00000171388/ENSG00000144891/ENSG00000239697/ENSG00000100292/ENSG00000113140/ENSG00000143494/ENSG00000165197…	GJA1/ALDH1A2/WNT5A/FLT4/FLT1/FGF2/PGF/PROX1/PPP1R16B/MEF2C/PTPRM/NRP2/JCAD/AKT3/THBS4/BMP6/PRKD1/TNMD/APLN/AGTR1/TNFSF12/HMOX1/SPARC/VASH2/VEGFD/VASH1/MIR10B/SULF1/PRKCA/RGCC/SIRT1/JUN	32
BP	GO:0007494	midgut development	7|2417	12|14725	0.0011702	0.0356904	ENSG00000128602/ENSG00000128918/ENSG00000114251/ENSG00000103241/ENSG00000136160/ENSG00000176678/ENSG00000146648	SMO/ALDH1A2/WNT5A/FOXF1/EDNRB/FOXL1/EGFR	7
BP	GO:0021520	spinal cord motor neuron cell fate specification	7|2417	12|14725	0.0011702	0.0356904	ENSG00000074047/ENSG00000128710/ENSG00000016082/ENSG00000007372/ENSG00000163623/ENSG00000180818/ENSG00000159556	GLI2/HOXD10/ISL1/PAX6/NKX6-1/HOXC10/ISL2	7
BP	GO:0021542	dentate gyrus development	7|2417	12|14725	0.0011702	0.0356904	ENSG00000128602/ENSG00000138795/ENSG00000144868/ENSG00000117707/ENSG00000170370/ENSG00000112333/ENSG00000131437	SMO/LEF1/TMEM108/PROX1/EMX2/NR2E1/KIF3A	7
BP	GO:0021781	glial cell fate commitment	7|2417	12|14725	0.0011702	0.0356904	ENSG00000007372/ENSG00000205927/ENSG00000005513/ENSG00000110693/ENSG00000162367/ENSG00000125820/ENSG00000137270	PAX6/OLIG2/SOX8/SOX6/TAL1/NKX2-2/GCM1	7
BP	GO:0042693	muscle cell fate commitment	7|2417	12|14725	0.0011702	0.0356904	ENSG00000184058/ENSG00000183072/ENSG00000184937/ENSG00000081189/ENSG00000129152/ENSG00000154342/ENSG00000135111	TBX1/NKX2-5/WT1/MEF2C/MYOD1/WNT3A/TBX3	7
BP	GO:0014033	neural crest cell differentiation	21|2417	65|14725	0.001181	0.0356904	ENSG00000184058/ENSG00000128602/ENSG00000128918/ENSG00000019549/ENSG00000016082/ENSG00000138795/ENSG00000169554/ENSG00000122691/ENSG00000005513/ENSG00000180318/ENSG00000054598/ENSG00000164107/ENSG00000081189/ENSG00000075213/ENSG00000164093/ENSG00000104332/ENSG00000136160/ENSG00000176692/ENSG00000163376/ENSG00000151617/ENSG00000121039	TBX1/SMO/ALDH1A2/SNAI2/ISL1/LEF1/ZEB2/TWIST1/SOX8/ALX1/FOXC1/HAND2/MEF2C/SEMA3A/PITX2/SFRP1/EDNRB/FOXC2/KBTBD8/EDNRA/RDH10	21
BP	GO:0014855	striated muscle cell proliferation	21|2417	65|14725	0.001181	0.0356904	ENSG00000152661/ENSG00000183072/ENSG00000069702/ENSG00000138685/ENSG00000169946/ENSG00000054598/ENSG00000081189/ENSG00000154928/ENSG00000164532/ENSG00000154188/ENSG00000078900/ENSG00000143995/ENSG00000126778/ENSG00000145794/ENSG00000176692/ENSG00000138379/ENSG00000183691/ENSG00000102678/ENSG00000111087/ENSG00000151748/ENSG00000159086	GJA1/NKX2-5/TGFBR3/FGF2/ZFPM2/FOXC1/MEF2C/EPHB1/TBX20/ANGPT1/TP73/MEIS1/SIX1/MEGF10/FOXC2/MSTN/NOG/FGF9/GLI1/SAV1/PAXBP1	21
BP	GO:0051899	membrane depolarization	26|2417	87|14725	0.00122063	0.0364954	ENSG00000152661/ENSG00000145362/ENSG00000022267/ENSG00000183873/ENSG00000182389/ENSG00000148408/ENSG00000153956/ENSG00000183023/ENSG00000136531/ENSG00000143799/ENSG00000213190/ENSG00000177098/ENSG00000166257/ENSG00000101204/ENSG00000007314/ENSG00000108961/ENSG00000165995/ENSG00000182533/ENSG00000169432/ENSG00000188906/ENSG00000149575/ENSG00000153253/ENSG00000023909/ENSG00000151067/ENSG00000177606…	GJA1/ANK2/FHL1/SCN5A/CACNB4/CACNA1B/CACNA2D1/SLC8A1/SCN2A/PARP1/MLLT11/SCN4B/SCN3B/CHRNA4/SCN4A/RANGRF/CACNB2/CAV3/SCN9A/LRRK2/SCN2B/SCN3A/GCLM/CACNA1C/JUN/SCN11A	26
BP	GO:0061326	renal tubule development	26|2417	87|14725	0.00122063	0.0364954	ENSG00000147257/ENSG00000128602/ENSG00000005073/ENSG00000125931/ENSG00000103449/ENSG00000187498/ENSG00000128713/ENSG00000170577/ENSG00000138685/ENSG00000119630/ENSG00000166341/ENSG00000198914/ENSG00000005513/ENSG00000184937/ENSG00000185920/ENSG00000081189/ENSG00000104313/ENSG00000126562/ENSG00000075891/ENSG00000139292/ENSG00000146021/ENSG00000163909/ENSG00000196159/ENSG00000126778/ENSG00000183691…	GPC3/SMO/HOXA11/CITED1/SALL1/COL4A1/HOXD11/SIX2/FGF2/PGF/DCHS1/POU3F3/SOX8/WT1/PTCH1/MEF2C/EYA1/WNK4/PAX2/LGR5/KLHL3/HEYL/FAT4/SIX1/NOG/OSR1	26
BP	GO:0038084	vascular endothelial growth factor signaling pathway	12|2417	29|14725	0.00123604	0.0365673	ENSG00000156140/ENSG00000196628/ENSG00000037280/ENSG00000102755/ENSG00000054598/ENSG00000118257/ENSG00000165757/ENSG00000184304/ENSG00000020181/ENSG00000183287/ENSG00000134853/ENSG00000113721	ADAMTS3/TCF4/FLT4/FLT1/FOXC1/NRP2/JCAD/PRKD1/ADGRA2/CCBE1/PDGFRA/PDGFRB	12
BP	GO:0097484	dendrite extension	12|2417	29|14725	0.00123604	0.0365673	ENSG00000119866/ENSG00000143858/ENSG00000158321/ENSG00000144868/ENSG00000198689/ENSG00000188729/ENSG00000107295/ENSG00000112290/ENSG00000176406/ENSG00000103528/ENSG00000079841/ENSG00000185345	BCL11A/SYT2/AUTS2/TMEM108/SLC9A6/OSTN/SH3GL2/WASF1/RIMS2/SYT17/RIMS1/PRKN	12
BP	GO:0035914	skeletal muscle cell differentiation	20|2417	61|14725	0.00124907	0.0367592	ENSG00000184058/ENSG00000005513/ENSG00000148704/ENSG00000009709/ENSG00000081189/ENSG00000142700/ENSG00000154928/ENSG00000239474/ENSG00000064309/ENSG00000163909/ENSG00000003137/ENSG00000126778/ENSG00000145794/ENSG00000138379/ENSG00000129152/ENSG00000108924/ENSG00000162772/ENSG00000100201/ENSG00000154342/ENSG00000156853	TBX1/SOX8/VAX1/PAX7/MEF2C/DMRTA2/EPHB1/KLHL41/CDON/HEYL/CYP26B1/SIX1/MEGF10/MSTN/MYOD1/HLF/ATF3/DDX17/WNT3A/ZNF689	20
BP	GO:0006814	sodium ion transport	48|2417	191|14725	0.00127109	0.0372125	ENSG00000089327/ENSG00000072041/ENSG00000196632/ENSG00000183072/ENSG00000183873/ENSG00000183023/ENSG00000018236/ENSG00000164707/ENSG00000198689/ENSG00000198947/ENSG00000145248/ENSG00000126562/ENSG00000080493/ENSG00000136531/ENSG00000140090/ENSG00000180881/ENSG00000181804/ENSG00000146021/ENSG00000129244/ENSG00000135919/ENSG00000177098/ENSG00000152818/ENSG00000166257/ENSG00000137726/ENSG00000148942…	FXYD5/SLC6A15/WNK3/NKX2-5/SCN5A/SLC8A1/CNTN1/SLC13A4/SLC9A6/DMD/SLC10A4/WNK4/SLC4A4/SCN2A/SLC24A4/CAPS2/SLC9A9/KLHL3/ATP1B2/SERPINE2/SCN4B/UTRN/SCN3B/FXYD6/SLC5A12/SLC13A5/SCN4A/RANGRF/SLC5A11/CAV3/SCN9A/SLC8A3/SCN2B/SLC38A3/SCN3A/NETO2/SLC10A7/SLC38A4/SLC9A5/SLC9B2/ATP2B4/SLC9B1/SLC4A5/OSR1/ATP12A/SLC23A2/SCN11A/SLC5A3	48
BP	GO:0035051	cardiocyte differentiation	34|2417	124|14725	0.00130567	0.0380267	ENSG00000112276/ENSG00000183072/ENSG00000069702/ENSG00000016082/ENSG00000077092/ENSG00000162614/ENSG00000122691/ENSG00000183023/ENSG00000184937/ENSG00000077522/ENSG00000110693/ENSG00000117707/ENSG00000164107/ENSG00000081189/ENSG00000154639/ENSG00000164093/ENSG00000133026/ENSG00000155657/ENSG00000154556/ENSG00000149269/ENSG00000117054/ENSG00000182533/ENSG00000134853/ENSG00000153187/ENSG00000146648…	BVES/NKX2-5/TGFBR3/ISL1/RARB/NEXN/TWIST1/SLC8A1/WT1/ACTN2/SOX6/PROX1/HAND2/MEF2C/CXADR/PITX2/MYH10/TTN/SORBS2/PAK1/ACADM/CAV3/PDGFRA/HNRNPU/EGFR/FHOD3/PDGFRB/DDX39B/TBXT/WNT3A/AKAP6/PROX2/SGCB/TBX3	34
BP	GO:0010927	cellular component assembly involved in morphogenesis	27|2417	92|14725	0.00134151	0.038845	ENSG00000174607/ENSG00000145362/ENSG00000082397/ENSG00000183072/ENSG00000077522/ENSG00000117707/ENSG00000109063/ENSG00000081189/ENSG00000133026/ENSG00000155657/ENSG00000036448/ENSG00000239474/ENSG00000163531/ENSG00000128596/ENSG00000182533/ENSG00000116906/ENSG00000143632/ENSG00000163431/ENSG00000134853/ENSG00000165410/ENSG00000087053/ENSG00000134775/ENSG00000113721/ENSG00000115020/ENSG00000028839…	UGT8/ANK2/EPB41L3/NKX2-5/ACTN2/PROX1/MYH3/MEF2C/MYH10/TTN/MYOM2/KLHL41/NFASC/CCDC136/CAV3/GNPAT/ACTA1/LMOD1/PDGFRA/CFL2/MTMR2/FHOD3/PDGFRB/PIKFYVE/TBPL1/KNL1/CNTNAP1	27
BP	GO:0021988	olfactory lobe development	13|2417	33|14725	0.00134759	0.038845	ENSG00000114251/ENSG00000103449/ENSG00000185008/ENSG00000145147/ENSG00000105880/ENSG00000075213/ENSG00000115844/ENSG00000164853/ENSG00000112333/ENSG00000103494/ENSG00000188906/ENSG00000095713/ENSG00000135049	WNT5A/SALL1/ROBO2/SLIT2/DLX5/SEMA3A/DLX2/UNCX/NR2E1/RPGRIP1L/LRRK2/CRTAC1/AGTPBP1	13
BP	GO:0048732	gland development	91|2417	412|14725	0.00143642	0.0409825	ENSG00000152661/ENSG00000233276/ENSG00000170689/ENSG00000116729/ENSG00000184058/ENSG00000128602/ENSG00000106004/ENSG00000074047/ENSG00000159184/ENSG00000143869/ENSG00000105997/ENSG00000147065/ENSG00000184486/ENSG00000181690/ENSG00000128714/ENSG00000128918/ENSG00000019549/ENSG00000136630/ENSG00000114251/ENSG00000183072/ENSG00000103449/ENSG00000069702/ENSG00000016082/ENSG00000138795/ENSG00000115112…	GJA1/GPX1/HOXB9/WLS/TBX1/SMO/HOXA5/GLI2/HOXB13/GDF7/HOXA3/MSN/POU3F2/PLAG1/HOXD13/ALDH1A2/SNAI2/HLX/WNT5A/NKX2-5/SALL1/TGFBR3/ISL1/LEF1/TFCP2L1/HOXB3/CDO1/PAX6/FOXF1/WT1/HOXD9/PTCH1/SERPINF1/FOXC1/FOXB1/DKK3/PROX1/HAND2/LBH/SEMA3A/PITX2/PDX1/SFRP1/FOXE1/PAX1/ETS1/SERPINE2/INSM1/WDR35/ATM/NKX2-1/MSX1/SOSTDC1/ACADM/RPGRIP1L/APLN/RAG1/CAV3/HMOX1/SIX1/ZIC3/PDGFRA/TPH1/TNC/EDA/AK4/SIX3/NOG/GLI1/EGFR/P…	91
BP	GO:0090102	cochlea development	15|2417	41|14725	0.00143967	0.0409825	ENSG00000162738/ENSG00000184058/ENSG00000148516/ENSG00000074047/ENSG00000114251/ENSG00000105991/ENSG00000166341/ENSG00000095777/ENSG00000099954/ENSG00000104313/ENSG00000075891/ENSG00000112320/ENSG00000103494/ENSG00000126778/ENSG00000165409	VANGL2/TBX1/ZEB1/GLI2/WNT5A/HOXA1/DCHS1/MYO3A/CECR2/EYA1/PAX2/SOBP/RPGRIP1L/SIX1/TSHR	15
BP	GO:0006936	muscle contraction	71|2417	308|14725	0.00144361	0.0409825	ENSG00000152661/ENSG00000122786/ENSG00000145362/ENSG00000213949/ENSG00000182963/ENSG00000184185/ENSG00000181104/ENSG00000183072/ENSG00000183873/ENSG00000087258/ENSG00000153956/ENSG00000183023/ENSG00000081181/ENSG00000213366/ENSG00000077522/ENSG00000108984/ENSG00000198947/ENSG00000109063/ENSG00000138193/ENSG00000116741/ENSG00000157404/ENSG00000134548/ENSG00000182674/ENSG00000136160/ENSG00000155657…	GJA1/CALD1/ANK2/ITGA1/GJC1/KCNJ12/F2R/NKX2-5/SCN5A/GNAO1/CACNA2D1/SLC8A1/ARG2/GSTM2/ACTN2/MAP2K6/DMD/MYH3/PLCE1/RGS2/KIT/SPX/KCNB2/EDNRB/TTN/SCN4B/TBX20/MYOM2/KLHL41/UTRN/PRKG1/SCN3B/CHRM3/GUCY1A1/DOCK4/CALCRL/SSTR2/TRPV1/ADORA2B/SCN4A/MYOT/GRIP2/CACNB2/CAV3/SLC8A3/ACTA1/SCN2B/FKBP1B/LMOD1/DSG2/DSC2/PTGS2/SORBS1/NMUR1/PROK2/PDE4B/SNTB1/NMU/NUP155/STAC/SRI/CHRNA3/MYLK/SMPX/SULF1/VCL/CACNA1C/EDNRA/…	71
BP	GO:0042391	regulation of membrane potential	80|2417	355|14725	0.00150162	0.0424152	ENSG00000152661/ENSG00000145362/ENSG00000182963/ENSG00000112276/ENSG00000022267/ENSG00000183873/ENSG00000132429/ENSG00000145335/ENSG00000182389/ENSG00000153291/ENSG00000148408/ENSG00000153956/ENSG00000183023/ENSG00000169760/ENSG00000141682/ENSG00000144868/ENSG00000077522/ENSG00000198947/ENSG00000081189/ENSG00000154639/ENSG00000133104/ENSG00000111249/ENSG00000116329/ENSG00000136531/ENSG00000154864…	GJA1/ANK2/GJC1/BVES/FHL1/SCN5A/POPDC3/SNCA/CACNB4/SLC25A27/CACNA1B/CACNA2D1/SLC8A1/NLGN1/PMAIP1/TMEM108/ACTN2/DMD/MEF2C/CXADR/SPART/CUX2/OPRD1/SCN2A/PIEZO2/AKAP7/PARP1/MLLT11/ATP1B2/SLC26A2/SCN4B/GRID1/SCN3B/MPP2/NLGN3/TRPV1/CHRNA4/SCN4A/RIMS2/RANGRF/KCNA2/CACNB2/CAV3/SCN9A/SLC8A3/LRRK2/SCN2B/SLC26A7/FKBP1B/GRID2/DSG2/CHRFAM7A/CBLN1/BCO2/DSC2/GRIK5/CHRNA7/GRIN3A/SCN3A/GCLM/MTMR2/FMR1/NUP155/SHANK…	80
BP	GO:0003401	axis elongation	11|2417	26|14725	0.00158384	0.0442925	ENSG00000162738/ENSG00000128714/ENSG00000114251/ENSG00000140807/ENSG00000104332/ENSG00000126778/ENSG00000136158/ENSG00000041982/ENSG00000125686/ENSG00000154342/ENSG00000121039	VANGL2/HOXD13/WNT5A/NKD1/SFRP1/SIX1/SPRY2/TNC/MED1/WNT3A/RDH10	11
BP	GO:0035116	embryonic hindlimb morphogenesis	11|2417	26|14725	0.00158384	0.0442925	ENSG00000147257/ENSG00000052850/ENSG00000077092/ENSG00000122691/ENSG00000164093/ENSG00000163132/ENSG00000103494/ENSG00000109906/ENSG00000143867/ENSG00000125686/ENSG00000135111	GPC3/ALX4/RARB/TWIST1/PITX2/MSX1/RPGRIP1L/ZBTB16/OSR1/MED1/TBX3	11
BP	GO:0071229	cellular response to acid chemical	47|2417	188|14725	0.00159298	0.0443275	ENSG00000162409/ENSG00000184058/ENSG00000148516/ENSG00000197565/ENSG00000128918/ENSG00000162909/ENSG00000114251/ENSG00000187498/ENSG00000010810/ENSG00000149212/ENSG00000119866/ENSG00000132386/ENSG00000108576/ENSG00000204262/ENSG00000186469/ENSG00000104332/ENSG00000075891/ENSG00000087245/ENSG00000105996/ENSG00000062524/ENSG00000003137/ENSG00000117586/ENSG00000142156/ENSG00000122420/ENSG00000126778…	PRKAA2/TBX1/ZEB1/COL4A6/ALDH1A2/CAPN2/WNT5A/COL4A1/FYN/SESN3/BCL11A/SERPINF1/SLC6A4/COL5A2/GNG2/SFRP1/PAX2/MMP2/HOXA2/LTK/CYP26B1/TNFSF4/COL6A1/PTGFR/SIX1/IPO5/AQP1/PDGFRA/SLC38A9/RORB/HDAC2/AVPR1A/PDGFC/RRAGD/TNC/NTRK2/GCLM/EGFR/WNT10B/FZD10/TBXT/HNRNPD/OSR1/LYN/WNT3A/SIPA1/LARS	47
BP	GO:0072028	nephron morphogenesis	22|2417	71|14725	0.00168531	0.0466657	ENSG00000147257/ENSG00000128602/ENSG00000005073/ENSG00000125931/ENSG00000103449/ENSG00000128713/ENSG00000170577/ENSG00000138685/ENSG00000119630/ENSG00000166341/ENSG00000005513/ENSG00000184937/ENSG00000185920/ENSG00000104313/ENSG00000126562/ENSG00000075891/ENSG00000146021/ENSG00000196159/ENSG00000126778/ENSG00000183691/ENSG00000113721/ENSG00000143867	GPC3/SMO/HOXA11/CITED1/SALL1/HOXD11/SIX2/FGF2/PGF/DCHS1/SOX8/WT1/PTCH1/EYA1/WNK4/PAX2/KLHL3/FAT4/SIX1/NOG/PDGFRB/OSR1	22
BP	GO:0035637	multicellular organismal signaling	45|2417	179|14725	0.00175591	0.0483821	ENSG00000152661/ENSG00000166086/ENSG00000145362/ENSG00000182963/ENSG00000184185/ENSG00000183072/ENSG00000183873/ENSG00000182389/ENSG00000153956/ENSG00000183023/ENSG00000154639/ENSG00000136531/ENSG00000129244/ENSG00000177098/ENSG00000170989/ENSG00000157445/ENSG00000166257/ENSG00000137726/ENSG00000142408/ENSG00000145244/ENSG00000163531/ENSG00000007314/ENSG00000108961/ENSG00000177301/ENSG00000165995…	GJA1/JAM3/ANK2/GJC1/KCNJ12/NKX2-5/SCN5A/CACNB4/CACNA2D1/SLC8A1/CXADR/SCN2A/ATP1B2/SCN4B/S1PR1/CACNA2D3/SCN3B/FXYD6/CACNG8/CORIN/NFASC/SCN4A/RANGRF/KCNA2/CACNB2/SCN9A/SLC8A3/SCN2B/TRPC1/FKBP1B/DSG2/DSC2/AVPR1A/SCN3A/FMR1/ATP2B4/NUP155/SRI/CACNA2D2/DMRT3/CACNA1C/CNTNAP1/ASPH/KCNQ1/SCN11A	45
BP	GO:0007422	peripheral nervous system development	21|2417	67|14725	0.00181343	0.0494819	ENSG00000174607/ENSG00000184486/ENSG00000152192/ENSG00000128710/ENSG00000016082/ENSG00000005513/ENSG00000128709/ENSG00000164107/ENSG00000198947/ENSG00000006468/ENSG00000136160/ENSG00000163536/ENSG00000196569/ENSG00000163531/ENSG00000138386/ENSG00000159556/ENSG00000185668/ENSG00000148053/ENSG00000119547/ENSG00000108797/ENSG00000198743	UGT8/POU3F2/POU4F1/HOXD10/ISL1/SOX8/HOXD9/HAND2/DMD/ETV1/EDNRB/SERPINI1/LAMA2/NFASC/NAB1/ISL2/POU3F1/NTRK2/ONECUT2/CNTNAP1/SLC5A3	21
BP	GO:0072078	nephron tubule morphogenesis	21|2417	67|14725	0.00181343	0.0494819	ENSG00000147257/ENSG00000128602/ENSG00000005073/ENSG00000125931/ENSG00000103449/ENSG00000128713/ENSG00000170577/ENSG00000138685/ENSG00000119630/ENSG00000166341/ENSG00000005513/ENSG00000184937/ENSG00000185920/ENSG00000104313/ENSG00000126562/ENSG00000075891/ENSG00000146021/ENSG00000196159/ENSG00000126778/ENSG00000183691/ENSG00000143867	GPC3/SMO/HOXA11/CITED1/SALL1/HOXD11/SIX2/FGF2/PGF/DCHS1/SOX8/WT1/PTCH1/EYA1/WNK4/PAX2/KLHL3/FAT4/SIX1/NOG/OSR1	21
CC	GO:0005578	proteinaceous extracellular matrix	84|2541	313|15505	1.56825e-06	0.000632299	ENSG00000134871/ENSG00000147257/ENSG00000198732/ENSG00000138829/ENSG00000087303/ENSG00000154734/ENSG00000116962/ENSG00000050555/ENSG00000132205/ENSG00000156140/ENSG00000183798/ENSG00000197565/ENSG00000091136/ENSG00000038427/ENSG00000140092/ENSG00000187955/ENSG00000114251/ENSG00000101680/ENSG00000187498/ENSG00000069702/ENSG00000077942/ENSG00000262655/ENSG00000160963/ENSG00000112769/ENSG00000132386…	COL4A2/GPC3/SMOC1/FBN2/NID2/ADAMTS1/NID1/LAMC3/EMILIN2/ADAMTS3/EMILIN3/COL4A6/LAMB1/VCAN/FBLN5/COL14A1/WNT5A/LAMA1/COL4A1/TGFBR3/FBLN1/SPON1/COL26A1/LAMA4/SERPINF1/COL4A5/CCDC80/ADAMTS20/NDNF/ADAMTS2/COL5A2/HAPLN3/SFRP1/MMP2/EGFLAM/ADAMTS10/COL2A1/LOX/COL24A1/LAMA2/MFAP2/COL19A1/COMP/ALPL/THBS4/TFPI2/FLRT3/HSD17B12/COCH/COL6A1/FBLN2/CRTAC1/SBSPON/CCBE1/COLQ/OLFML2B/SPARC/P3H1/AMBN/PTPRZ1/SPOCK2/P…	84
CC	GO:0044420	extracellular matrix component	38|2541	109|15505	1.95154e-06	0.000632299	ENSG00000134871/ENSG00000198732/ENSG00000138829/ENSG00000087303/ENSG00000154734/ENSG00000116962/ENSG00000050555/ENSG00000197565/ENSG00000091136/ENSG00000140092/ENSG00000187955/ENSG00000101680/ENSG00000187498/ENSG00000077942/ENSG00000112769/ENSG00000132386/ENSG00000188153/ENSG00000091986/ENSG00000204262/ENSG00000164318/ENSG00000142303/ENSG00000139219/ENSG00000196569/ENSG00000117122/ENSG00000113296…	COL4A2/SMOC1/FBN2/NID2/ADAMTS1/NID1/LAMC3/COL4A6/LAMB1/FBLN5/COL14A1/LAMA1/COL4A1/FBLN1/LAMA4/SERPINF1/COL4A5/CCDC80/COL5A2/EGFLAM/ADAMTS10/COL2A1/LAMA2/MFAP2/THBS4/COLQ/SPARC/PTPRZ1/P3H2/ITGA6/TNC/COL27A1/FGF9/LAMA3/TIMP3/FBN1/SMC3/COL8A1	38
CC	GO:0001518	voltage-gated sodium channel complex	9|2541	12|15505	1.15135e-05	0.00248692	ENSG00000183873/ENSG00000136531/ENSG00000177098/ENSG00000166257/ENSG00000007314/ENSG00000169432/ENSG00000149575/ENSG00000153253/ENSG00000168356	SCN5A/SCN2A/SCN4B/SCN3B/SCN4A/SCN9A/SCN2B/SCN3A/SCN11A	9
CC	GO:0005604	basement membrane	30|2541	87|15505	2.88937e-05	0.00397507	ENSG00000134871/ENSG00000198732/ENSG00000087303/ENSG00000154734/ENSG00000116962/ENSG00000050555/ENSG00000197565/ENSG00000091136/ENSG00000101680/ENSG00000187498/ENSG00000077942/ENSG00000112769/ENSG00000132386/ENSG00000188153/ENSG00000091986/ENSG00000164318/ENSG00000139219/ENSG00000196569/ENSG00000113296/ENSG00000206561/ENSG00000113140/ENSG00000090530/ENSG00000091409/ENSG00000041982/ENSG00000102678…	COL4A2/SMOC1/NID2/ADAMTS1/NID1/LAMC3/COL4A6/LAMB1/LAMA1/COL4A1/FBLN1/LAMA4/SERPINF1/COL4A5/CCDC80/EGFLAM/COL2A1/LAMA2/THBS4/COLQ/SPARC/P3H2/ITGA6/TNC/FGF9/LAMA3/TIMP3/FBN1/SMC3/COL8A1	30
CC	GO:0098794	postsynapse	93|2541	381|15505	3.06718e-05	0.00397507	ENSG00000159217/ENSG00000178695/ENSG00000117519/ENSG00000170558/ENSG00000169860/ENSG00000145362/ENSG00000082397/ENSG00000166313/ENSG00000177707/ENSG00000075340/ENSG00000181104/ENSG00000010810/ENSG00000168824/ENSG00000145335/ENSG00000131711/ENSG00000131435/ENSG00000119866/ENSG00000183023/ENSG00000169760/ENSG00000135298/ENSG00000126970/ENSG00000197467/ENSG00000198121/ENSG00000077063/ENSG00000144868…	IGF2BP1/KCTD12/CNN3/CDH2/P2RY1/ANK2/EPB41L3/APBB1/NECTIN3/ADD2/F2R/FYN/NSG1/SNCA/MAP1B/PDLIM4/BCL11A/SLC8A1/NLGN1/ADGRB3/ZC4H2/COL13A1/LPAR1/CTTNBP2/TMEM108/SIGMAR1/ACTN2/ADD3/PTCH1/GABRA3/DMD/SYNE1/EPHA7/MEF2C/ITGA8/OPRD1/NRGN/LRRTM4/MYH10/DNM3/EPB41/LZTS1/LRRC7/LAMA2/GPM6A/GABRE/DRP2/LRP4/UTRN/GRID1/CHRM3/CACNG8/MPP2/GAP43/NLGN3/ZNF804A/TRPV1/PCLO/CHRNA4/GRIP2/SLC8A3/LRRK2/GOPC/DISC1/GRID2/SYN3…	93
CC	GO:0044441	ciliary part	93|2541	383|15505	3.79722e-05	0.00410099	ENSG00000125354/ENSG00000115355/ENSG00000128602/ENSG00000074047/ENSG00000155980/ENSG00000134874/ENSG00000136425/ENSG00000072840/ENSG00000131711/ENSG00000143147/ENSG00000144451/ENSG00000185920/ENSG00000148600/ENSG00000164066/ENSG00000006611/ENSG00000169126/ENSG00000158163/ENSG00000188452/ENSG00000187240/ENSG00000144061/ENSG00000153208/ENSG00000138686/ENSG00000075945/ENSG00000132122/ENSG00000117245…	SEPT6/CCDC88A/SMO/GLI2/KIF5A/DZIP1/CIB2/EVC/MAP1B/GPR161/SPAG16/PTCH1/CDHR1/INTU/USH1C/ARMC4/DZIP1L/CERKL/DYNC2H1/NPHP1/MERTK/BBS7/KIFAP3/SPATA6/KIF17/EFCAB7/WDR35/AK2/DNAH6/CCSAP/IFT81/ARL6/TTBK2/CEP170/RPGRIP1L/DNHD1/FAM161A/DNAH14/CEP126/TUBB4A/CEP290/DISC1/AKAP3/RSPH4A/CYLD/OPN1SW/CENPF/MOK/CYS1/CATSPERE/MNS1/KIF3A/SCLT1/RGS9/RP2/TMEM237/DYNC2LI1/RTTN/HSPB11/CEP162/GLI1/WDR19/SSX2IP/DNAH11/SL…	93
CC	GO:0034706	sodium channel complex	11|2541	19|15505	4.67404e-05	0.00432683	ENSG00000183873/ENSG00000136531/ENSG00000177098/ENSG00000166257/ENSG00000007314/ENSG00000169432/ENSG00000149575/ENSG00000105737/ENSG00000153253/ENSG00000149403/ENSG00000168356	SCN5A/SCN2A/SCN4B/SCN3B/SCN4A/SCN9A/SCN2B/GRIK5/SCN3A/GRIK4/SCN11A	11
CC	GO:0005581	collagen trimer	27|2541	80|15505	0.000108223	0.00795684	ENSG00000134871/ENSG00000132205/ENSG00000197565/ENSG00000187955/ENSG00000187498/ENSG00000158270/ENSG00000188517/ENSG00000160963/ENSG00000197467/ENSG00000188153/ENSG00000204262/ENSG00000139219/ENSG00000113083/ENSG00000171502/ENSG00000082293/ENSG00000118004/ENSG00000142156/ENSG00000183287/ENSG00000206561/ENSG00000166788/ENSG00000173918/ENSG00000158813/ENSG00000186897/ENSG00000196739/ENSG00000172752…	COL4A2/EMILIN2/COL4A6/COL14A1/COL4A1/COLEC12/COL25A1/COL26A1/COL13A1/COL4A5/COL5A2/COL2A1/LOX/COL24A1/COL19A1/COLEC11/COL6A1/CCBE1/COLQ/SAAL1/C1QTNF1/EDA/C1QL4/COL27A1/COL6A5/COL8A1/COL21A1	27
CC	GO:0097060	synaptic membrane	66|2541	259|15505	0.000110512	0.00795684	ENSG00000178695/ENSG00000169860/ENSG00000145362/ENSG00000166313/ENSG00000177707/ENSG00000181104/ENSG00000131409/ENSG00000168824/ENSG00000131435/ENSG00000183023/ENSG00000169760/ENSG00000126970/ENSG00000197467/ENSG00000144868/ENSG00000147955/ENSG00000011677/ENSG00000198947/ENSG00000131018/ENSG00000135333/ENSG00000101298/ENSG00000077943/ENSG00000116329/ENSG00000176204/ENSG00000197959/ENSG00000061337…	KCTD12/P2RY1/ANK2/APBB1/NECTIN3/F2R/LRRC4B/NSG1/PDLIM4/SLC8A1/NLGN1/ZC4H2/COL13A1/TMEM108/SIGMAR1/GABRA3/DMD/SYNE1/EPHA7/SNPH/ITGA8/OPRD1/LRRTM4/DNM3/LZTS1/LRRC7/GABRE/DRP2/LRP4/UTRN/GRID1/SYP/CHRM3/CACNG8/MPP2/NLGN3/TRPV1/FLRT3/CHRNA4/RIMS2/GRIP2/KCNA2/GOPC/DISC1/GRID2/CBLN1/GRIK5/CABP1/CHRNA7/GRIN3A/NTRK2/KCTD16/MTMR2/FMR1/GAD2/RGS14/SHANK1/RIMS1/CHRNA3/LRFN1/SYT11/RAPSN/GABRR2/GRIA4/GRIK4/SYNJ1	66
CC	GO:0045211	postsynaptic membrane	52|2541	194|15505	0.00014898	0.00965388	ENSG00000178695/ENSG00000169860/ENSG00000145362/ENSG00000166313/ENSG00000177707/ENSG00000181104/ENSG00000168824/ENSG00000131435/ENSG00000183023/ENSG00000169760/ENSG00000126970/ENSG00000197467/ENSG00000144868/ENSG00000147955/ENSG00000011677/ENSG00000198947/ENSG00000131018/ENSG00000135333/ENSG00000116329/ENSG00000176204/ENSG00000197959/ENSG00000061337/ENSG00000033122/ENSG00000102287/ENSG00000102385…	KCTD12/P2RY1/ANK2/APBB1/NECTIN3/F2R/NSG1/PDLIM4/SLC8A1/NLGN1/ZC4H2/COL13A1/TMEM108/SIGMAR1/GABRA3/DMD/SYNE1/EPHA7/OPRD1/LRRTM4/DNM3/LZTS1/LRRC7/GABRE/DRP2/UTRN/GRID1/CHRM3/CACNG8/NLGN3/TRPV1/CHRNA4/GRIP2/GOPC/DISC1/GRID2/CBLN1/GRIK5/CABP1/CHRNA7/GRIN3A/NTRK2/KCTD16/FMR1/RGS14/SHANK1/CHRNA3/LRFN1/RAPSN/GABRR2/GRIA4/GRIK4	52
CC	GO:0031012	extracellular matrix	92|2541	396|15505	0.000227248	0.0126607	ENSG00000170558/ENSG00000134871/ENSG00000147257/ENSG00000198732/ENSG00000149294/ENSG00000138829/ENSG00000087303/ENSG00000154734/ENSG00000116962/ENSG00000050555/ENSG00000132205/ENSG00000156140/ENSG00000183798/ENSG00000197565/ENSG00000091136/ENSG00000038427/ENSG00000140092/ENSG00000187955/ENSG00000114251/ENSG00000101680/ENSG00000187498/ENSG00000182534/ENSG00000069702/ENSG00000077942/ENSG00000262655…	CDH2/COL4A2/GPC3/SMOC1/NCAM1/FBN2/NID2/ADAMTS1/NID1/LAMC3/EMILIN2/ADAMTS3/EMILIN3/COL4A6/LAMB1/VCAN/FBLN5/COL14A1/WNT5A/LAMA1/COL4A1/MXRA7/TGFBR3/FBLN1/SPON1/COL26A1/LAMA4/SERPINF1/COL4A5/CCDC80/ADAMTS20/NDNF/ADAMTS2/COL5A2/HAPLN3/SFRP1/MMP2/EGFLAM/ADAMTS10/SERPINE2/LPL/COL2A1/LOX/COL24A1/LAMA2/MFAP2/CDON/COL19A1/COMP/ALPL/THBS4/TFPI2/FLRT3/HSD17B12/COCH/COL6A1/GDF10/FBLN2/CRTAC1/SBSPON/CCBE1/COL…	92
CC	GO:0098797	plasma membrane protein complex	106|2541	469|15505	0.000241901	0.0126607	ENSG00000152661/ENSG00000170558/ENSG00000213949/ENSG00000182963/ENSG00000204525/ENSG00000127955/ENSG00000141404/ENSG00000234745/ENSG00000069702/ENSG00000072840/ENSG00000183873/ENSG00000087258/ENSG00000003400/ENSG00000124785/ENSG00000115232/ENSG00000182389/ENSG00000185760/ENSG00000148408/ENSG00000153956/ENSG00000169760/ENSG00000197467/ENSG00000162687/ENSG00000127920/ENSG00000116396/ENSG00000198947…	GJA1/CDH2/ITGA1/GJC1/HLA-C/GNAI1/GNAL/HLA-B/TGFBR3/EVC/SCN5A/GNAO1/CASP10/NRN1/ITGA4/CACNB4/KCNQ5/CACNA1B/CACNA2D1/NLGN1/COL13A1/KCNT2/GNG11/KCNC4/DMD/GNG2/ITGA8/ACVR1C/CD40/IFNLR1/SCN2A/KCNC1/KCNB2/ATP1B2/RAMP2/ITGA9/SCN4B/KCNQ2/EFCAB7/KCNA3/LRP4/RGS7/UTRN/SCN3B/CACNG8/KCNN1/GJA3/CALCRL/TLR6/CHRNA4/GNG4/GALNT8/SCN4A/KCNA2/CACNB2/KCNG3/CAV3/AP2A2/SCN9A/CNTFR/SCN2B/GRID2/GRIK5/ABHD6/ABCC8/GNG7/SOR…	106
CC	GO:0005813	centrosome	108|2541	480|15505	0.000253995	0.0126607	ENSG00000115355/ENSG00000169515/ENSG00000127955/ENSG00000072832/ENSG00000182742/ENSG00000101000/ENSG00000153790/ENSG00000044459/ENSG00000160469/ENSG00000075891/ENSG00000277443/ENSG00000138686/ENSG00000160050/ENSG00000075945/ENSG00000119638/ENSG00000163808/ENSG00000118965/ENSG00000111860/ENSG00000154429/ENSG00000077254/ENSG00000122970/ENSG00000120647/ENSG00000154240/ENSG00000143702/ENSG00000156876…	CCDC88A/CCDC8/GNAI1/CRMP1/HOXB4/PROCR/C7orf31/CNTLN/BRSK1/PAX2/MARCKS/BBS7/CCDC28B/KIFAP3/NEK9/KIF15/WDR35/CEP85L/CCSAP/USP33/IFT81/CCDC77/CEP112/CEP170/SASS6/RPGRIP1L/FAM161A/ODF2L/TUBE1/PIBF1/CEP44/DTL/CDC14B/KIZ/CAPRIN2/CEP126/NEK1/CCDC15/CDKL2/CEP290/DISC1/PKN2/CEP57L1/CEP97/BRSK2/CYLD/CENPF/CEP135/TBC1D31/SORBS1/CDC27/MZT1/CEP57/KIF3A/BCCIP/SCLT1/EYA3/MTUS2/RRAGD/KATNAL1/PDE4B/HASPIN/ASPM/DY…	108
CC	GO:0044450	microtubule organizing center part	44|2541	161|15505	0.000292937	0.0135588	ENSG00000115355/ENSG00000134874/ENSG00000159433/ENSG00000204536/ENSG00000044459/ENSG00000158163/ENSG00000075891/ENSG00000154429/ENSG00000128881/ENSG00000143702/ENSG00000156876/ENSG00000074935/ENSG00000083535/ENSG00000137601/ENSG00000126467/ENSG00000198707/ENSG00000174799/ENSG00000204899/ENSG00000131437/ENSG00000107949/ENSG00000151466/ENSG00000102218/ENSG00000184588/ENSG00000168172/ENSG00000166004…	CCDC88A/DZIP1/STARD9/CCHCR1/CNTLN/DZIP1L/PAX2/CCSAP/TTBK2/CEP170/SASS6/TUBE1/PIBF1/NEK1/TSKS/CEP290/CEP135/MZT1/KIF3A/BCCIP/SCLT1/RP2/PDE4B/HOOK3/CEP295/CEP162/SSX2IP/TCP1/CCDC113/BRCA1/CEP19/TOP2A/KIAA0753/MPHOSPH9/CCDC14/CCP110/CCDC151/FGFR1OP/CCDC146/KIAA0586/KIF2A/CEP128/CETN3/NIN	44
CC	GO:0030424	axon	106|2541	479|15505	0.000544091	0.0235047	ENSG00000159217/ENSG00000154277/ENSG00000125354/ENSG00000159164/ENSG00000104722/ENSG00000082397/ENSG00000166313/ENSG00000277586/ENSG00000121297/ENSG00000150471/ENSG00000164099/ENSG00000131409/ENSG00000185008/ENSG00000145335/ENSG00000131711/ENSG00000171517/ENSG00000185483/ENSG00000154134/ENSG00000158321/ENSG00000144868/ENSG00000147955/ENSG00000185920/ENSG00000132386/ENSG00000184226/ENSG00000198689…	IGF2BP1/UCHL1/SEPT6/SV2A/NEFM/EPB41L3/APBB1/NEFL/TSHZ3/ADGRL3/PRSS12/LRRC4B/ROBO2/SNCA/MAP1B/LPAR3/ROR1/ROBO3/AUTS2/TMEM108/SIGMAR1/PTCH1/SERPINF1/PCDH9/SLC9A6/BIN1/MGARP/EPHA5/KCNC4/DMD/MME/CXADR/SEMA3A/CD40/OPRD1/SCN2A/KCNC1/EPHB1/NRGN/MYH10/DNM3/KCNQ2/GPM6A/KCNA3/UTRN/SYP/CHRM3/PAK1/CA2/GAP43/AZIN2/CCSAP/ZNF804A/ACADM/ATL1/FLRT3/NEK3/NFASC/ADAM21/KCNA2/TIAM2/OTX2/LRRK2/TUBB4A/CRTAC1/NAV1/DOCK7…	106
CC	GO:0097014	ciliary plasm	31|2541	107|15505	0.000763103	0.0308051	ENSG00000074047/ENSG00000144451/ENSG00000169126/ENSG00000187240/ENSG00000138686/ENSG00000075945/ENSG00000117245/ENSG00000118965/ENSG00000115423/ENSG00000154429/ENSG00000113966/ENSG00000103494/ENSG00000179532/ENSG00000185842/ENSG00000104833/ENSG00000111834/ENSG00000117724/ENSG00000138587/ENSG00000131437/ENSG00000138036/ENSG00000135315/ENSG00000111087/ENSG00000105877/ENSG00000204104/ENSG00000114302…	GLI2/SPAG16/ARMC4/DYNC2H1/BBS7/KIFAP3/KIF17/WDR35/DNAH6/CCSAP/ARL6/RPGRIP1L/DNHD1/DNAH14/TUBB4A/RSPH4A/CENPF/MNS1/KIF3A/DYNC2LI1/CEP162/GLI1/DNAH11/TRAF3IP1/PRKAR2A/NEK4/CCDC151/PIK3C3/CCDC39/EFHC1/CFAP74	31
CC	GO:0042383	sarcolemma	32|2541	112|15505	0.000823015	0.0308051	ENSG00000170558/ENSG00000128591/ENSG00000145362/ENSG00000112276/ENSG00000136425/ENSG00000183873/ENSG00000153956/ENSG00000183023/ENSG00000170681/ENSG00000136717/ENSG00000198947/ENSG00000113396/ENSG00000136531/ENSG00000196569/ENSG00000152818/ENSG00000120729/ENSG00000165995/ENSG00000182533/ENSG00000142156/ENSG00000100678/ENSG00000240583/ENSG00000006071/ENSG00000160191/ENSG00000172164/ENSG00000172554…	CDH2/FLNC/ANK2/BVES/CIB2/SCN5A/CACNA2D1/SLC8A1/CAVIN4/BIN1/DMD/SLC27A6/SCN2A/LAMA2/UTRN/MYOT/CACNB2/CAV3/COL6A1/SLC8A3/AQP1/ABCC8/PDE9A/SNTB1/SNTG2/ATP2B4/STAC/SRI/VCL/CACNA1C/AKAP6/SGCB	32
CC	GO:0034703	cation channel complex	48|2541	188|15505	0.000855698	0.0308051	ENSG00000183873/ENSG00000124785/ENSG00000182389/ENSG00000185760/ENSG00000148408/ENSG00000153956/ENSG00000169760/ENSG00000162687/ENSG00000116396/ENSG00000136531/ENSG00000129159/ENSG00000182674/ENSG00000177098/ENSG00000075043/ENSG00000177272/ENSG00000166257/ENSG00000142408/ENSG00000105642/ENSG00000130035/ENSG00000007314/ENSG00000177301/ENSG00000165995/ENSG00000171126/ENSG00000169432/ENSG00000149575…	SCN5A/NRN1/CACNB4/KCNQ5/CACNA1B/CACNA2D1/NLGN1/KCNT2/KCNC4/SCN2A/KCNC1/KCNB2/SCN4B/KCNQ2/KCNA3/SCN3B/CACNG8/KCNN1/GALNT8/SCN4A/KCNA2/CACNB2/KCNG3/SCN9A/SCN2B/FKBP1B/GRIK5/ABHD6/ABCC8/CATSPERE/GRIN3A/SCN3A/SACM1L/PDE4B/KCNAB1/SHANK1/CPT1C/CACNA2D2/PKD1L1/KCNJ1/CACNA1C/GRIA4/AKAP6/CNTNAP1/KCNJ6/GRIK4/KCNQ1/SCN11A	48
CC	GO:0000779	condensed chromosome, centromeric region	32|2541	114|15505	0.00114132	0.0389249	ENSG00000125354/ENSG00000153157/ENSG00000166582/ENSG00000142856/ENSG00000117697/ENSG00000156531/ENSG00000101265/ENSG00000069248/ENSG00000109805/ENSG00000120253/ENSG00000152133/ENSG00000040275/ENSG00000138778/ENSG00000086827/ENSG00000117724/ENSG00000158560/ENSG00000203760/ENSG00000153187/ENSG00000143756/ENSG00000117650/ENSG00000143228/ENSG00000169679/ENSG00000089685/ENSG00000151503/ENSG00000149636…	SEPT6/SYCP2L/CENPV/ITGB3BP/NSL1/PHF6/RASSF2/NUP133/NCAPG/NUP43/GPATCH11/SPDL1/CENPE/ZW10/CENPF/DYNC1I1/CENPW/HNRNPU/FBXO28/NEK2/NUF2/BUB1/BIRC5/NCAPD3/DSN1/CENPK/CENPH/ERCC6L/MAD2L1/KNL1/SMC1A/PPP1CC	32
CC	GO:0000777	condensed chromosome kinetochore	29|2541	101|15505	0.00129609	0.0419932	ENSG00000125354/ENSG00000166582/ENSG00000142856/ENSG00000117697/ENSG00000156531/ENSG00000101265/ENSG00000069248/ENSG00000120253/ENSG00000152133/ENSG00000040275/ENSG00000138778/ENSG00000086827/ENSG00000117724/ENSG00000158560/ENSG00000203760/ENSG00000153187/ENSG00000143756/ENSG00000117650/ENSG00000143228/ENSG00000169679/ENSG00000089685/ENSG00000149636/ENSG00000123219/ENSG00000153044/ENSG00000186871…	SEPT6/CENPV/ITGB3BP/NSL1/PHF6/RASSF2/NUP133/NUP43/GPATCH11/SPDL1/CENPE/ZW10/CENPF/DYNC1I1/CENPW/HNRNPU/FBXO28/NEK2/NUF2/BUB1/BIRC5/DSN1/CENPK/CENPH/ERCC6L/MAD2L1/KNL1/SMC1A/PPP1CC	29
CC	GO:0005930	axoneme	30|2541	106|15505	0.0013899	0.0428884	ENSG00000074047/ENSG00000144451/ENSG00000169126/ENSG00000187240/ENSG00000138686/ENSG00000075945/ENSG00000117245/ENSG00000118965/ENSG00000115423/ENSG00000154429/ENSG00000113966/ENSG00000103494/ENSG00000179532/ENSG00000185842/ENSG00000104833/ENSG00000111834/ENSG00000117724/ENSG00000138587/ENSG00000131437/ENSG00000138036/ENSG00000135315/ENSG00000111087/ENSG00000105877/ENSG00000204104/ENSG00000114302…	GLI2/SPAG16/ARMC4/DYNC2H1/BBS7/KIFAP3/KIF17/WDR35/DNAH6/CCSAP/ARL6/RPGRIP1L/DNHD1/DNAH14/TUBB4A/RSPH4A/CENPF/MNS1/KIF3A/DYNC2LI1/CEP162/GLI1/DNAH11/TRAF3IP1/PRKAR2A/CCDC151/PIK3C3/CCDC39/EFHC1/CFAP74	30
MF	GO:0001228	transcriptional activator activity, RNA polymerase II transcription regulatory region sequence-specific DNA binding	104|2497	378|15258	2.15966e-08	2.24604e-05	ENSG00000149948/ENSG00000118495/ENSG00000253293/ENSG00000106004/ENSG00000074047/ENSG00000196628/ENSG00000108001/ENSG00000184486/ENSG00000131668/ENSG00000181690/ENSG00000128714/ENSG00000052850/ENSG00000152192/ENSG00000183072/ENSG00000135457/ENSG00000128710/ENSG00000016082/ENSG00000137273/ENSG00000178662/ENSG00000138795/ENSG00000169554/ENSG00000105991/ENSG00000120093/ENSG00000007372/ENSG00000170577…	HMGA2/PLAGL1/HOXA10/HOXA5/GLI2/TCF4/EBF3/POU3F2/BARX1/PLAG1/HOXD13/ALX4/POU4F1/NKX2-5/TFCP2/HOXD10/ISL1/FOXF2/CSRNP3/LEF1/ZEB2/HOXA1/HOXB3/PAX6/SIX2/FOXF1/ZNF300/MAF/HOXC10/ESRRB/WT1/KLF15/ALX1/FOXC1/DLX5/HAND2/MEF2C/PITX2/HOXB5/HOXC4/PAX1/ETV1/DLX2/ETS1/PARP1/BARHL2/TBX20/SATB2/HOXA7/FOXD2/NR2E1/SOX21/MSX1/HSF2/HEYL/TP73/EBF2/ARID3B/HOXB2/HNF4G/PITX3/PPARA/MEIS1/RORA/OTX2/ZNF175/GCM1/FLI1/SIX1/F…	104
MF	GO:0000982	transcription factor activity, RNA polymerase II proximal promoter sequence-specific DNA binding	98|2497	378|15258	1.12519e-06	0.000369508	ENSG00000149948/ENSG00000253293/ENSG00000106004/ENSG00000074047/ENSG00000196628/ENSG00000128573/ENSG00000108001/ENSG00000184486/ENSG00000181690/ENSG00000128714/ENSG00000121297/ENSG00000019549/ENSG00000140968/ENSG00000152192/ENSG00000183072/ENSG00000135457/ENSG00000103449/ENSG00000016082/ENSG00000138795/ENSG00000175745/ENSG00000120093/ENSG00000007372/ENSG00000119866/ENSG00000170577/ENSG00000163623…	HMGA2/HOXA10/HOXA5/GLI2/TCF4/FOXP2/EBF3/POU3F2/PLAG1/HOXD13/TSHZ3/SNAI2/IRF8/POU4F1/NKX2-5/TFCP2/SALL1/ISL1/LEF1/NR2F1/HOXB3/PAX6/BCL11A/SIX2/NKX6-1/ZFPM2/EN1/ZNF536/WT1/KLF15/SOX6/DLX5/PROX1/HAND1/HAND2/DACH1/BATF3/MEF2C/PITX2/CUX2/PAX1/TSHZ2/ETV1/ETS1/BARHL2/TBX20/SATB2/INSM1/PRRX1/HOXA7/NKX3-2/NR2E1/SOX21/HOXA2/MSX1/HEYL/TP73/EBF2/ARID3B/HNF4G/PRDM5/PITX3/PPARA/MEIS1/GCFC2/GFI1/OTX2/GCM1/FLI1/…	98
MF	GO:0003705	transcription factor activity, RNA polymerase II distal enhancer sequence-specific binding	33|2497	88|15258	1.38838e-06	0.000369508	ENSG00000019549/ENSG00000140968/ENSG00000152192/ENSG00000183072/ENSG00000137273/ENSG00000138795/ENSG00000169554/ENSG00000206538/ENSG00000103241/ENSG00000205927/ENSG00000119715/ENSG00000112182/ENSG00000054598/ENSG00000117707/ENSG00000106829/ENSG00000081189/ENSG00000120075/ENSG00000198353/ENSG00000170162/ENSG00000178860/ENSG00000136352/ENSG00000179361/ENSG00000143995/ENSG00000176692/ENSG00000109906…	SNAI2/IRF8/POU4F1/NKX2-5/FOXF2/LEF1/ZEB2/VGLL3/FOXF1/OLIG2/ESRRB/BACH2/FOXC1/PROX1/TLE4/MEF2C/HOXB5/HOXC4/VGLL2/MSC/NKX2-1/ARID3B/MEIS1/FOXC2/ZBTB16/MYOD1/SIX3/GLI1/TBXT/NR5A1/SOX7/MITF/JUN	33
MF	GO:0001227	transcriptional repressor activity, RNA polymerase II transcription regulatory region sequence-specific DNA binding	62|2497	211|15258	1.42118e-06	0.000369508	ENSG00000149948/ENSG00000148516/ENSG00000159184/ENSG00000128573/ENSG00000121297/ENSG00000019549/ENSG00000140968/ENSG00000103449/ENSG00000161940/ENSG00000165556/ENSG00000215612/ENSG00000182568/ENSG00000175745/ENSG00000169554/ENSG00000007372/ENSG00000119866/ENSG00000163623/ENSG00000081059/ENSG00000169946/ENSG00000112182/ENSG00000163064/ENSG00000198597/ENSG00000128709/ENSG00000110693/ENSG00000148704…	HMGA2/ZEB1/HOXB13/FOXP2/TSHZ3/SNAI2/IRF8/SALL1/BCL6B/CDX2/HMX1/SATB1/NR2F1/ZEB2/PAX6/BCL11A/NKX6-1/TCF7/ZFPM2/BACH2/EN1/ZNF536/HOXD9/SOX6/VAX1/PROX1/HAND1/DACH1/BATF3/FOXD3/CUX2/TSHZ2/MSC/DMBX1/ESX1/INSM1/PRRX1/NKX3-2/NR2E1/HOXA2/MSX1/PHF6/PRDM5/PPARA/GCFC2/GFI1/ZNF175/ZNF589/ZKSCAN3/FOXO1/ZBTB16/TSHZ1/POU5F1/GLIS1/NR2C1/PCGF6/HELT/ATF3/MITF/IKZF5/PROX2/TBX3	62
MF	GO:0005201	extracellular matrix structural constituent	25|2497	59|15258	1.95834e-06	0.000407334	ENSG00000134871/ENSG00000138829/ENSG00000132205/ENSG00000197565/ENSG00000091136/ENSG00000038427/ENSG00000187955/ENSG00000101680/ENSG00000187498/ENSG00000077942/ENSG00000112769/ENSG00000188153/ENSG00000204262/ENSG00000140511/ENSG00000139219/ENSG00000171502/ENSG00000082293/ENSG00000105664/ENSG00000105825/ENSG00000163520/ENSG00000178522/ENSG00000196739/ENSG00000166147/ENSG00000142449/ENSG00000010610	COL4A2/FBN2/EMILIN2/COL4A6/LAMB1/VCAN/COL14A1/LAMA1/COL4A1/FBLN1/LAMA4/COL4A5/COL5A2/HAPLN3/COL2A1/COL24A1/COL19A1/COMP/TFPI2/FBLN2/AMBN/COL27A1/FBN1/FBN3/CD4	25
MF	GO:0071837	HMG box domain binding	12|2497	18|15258	2.52583e-06	0.00043781	ENSG00000105997/ENSG00000052850/ENSG00000007372/ENSG00000135903/ENSG00000198914/ENSG00000205927/ENSG00000105880/ENSG00000081189/ENSG00000198353/ENSG00000116132/ENSG00000005102/ENSG00000177606	HOXA3/ALX4/PAX6/PAX3/POU3F3/OLIG2/DLX5/MEF2C/HOXC4/PRRX1/MEOX1/JUN	12
MF	GO:0000987	proximal promoter sequence-specific DNA binding	98|2497	408|15258	3.53895e-05	0.00525787	ENSG00000149948/ENSG00000148516/ENSG00000253293/ENSG00000106004/ENSG00000074047/ENSG00000196628/ENSG00000128573/ENSG00000108001/ENSG00000184486/ENSG00000181690/ENSG00000128714/ENSG00000140968/ENSG00000183072/ENSG00000135457/ENSG00000103449/ENSG00000016082/ENSG00000138795/ENSG00000175745/ENSG00000120093/ENSG00000007372/ENSG00000122691/ENSG00000119866/ENSG00000170577/ENSG00000163623/ENSG00000081059…	HMGA2/ZEB1/HOXA10/HOXA5/GLI2/TCF4/FOXP2/EBF3/POU3F2/PLAG1/HOXD13/IRF8/NKX2-5/TFCP2/SALL1/ISL1/LEF1/NR2F1/HOXB3/PAX6/TWIST1/BCL11A/SIX2/NKX6-1/TCF7/EN1/ZNF536/SOX6/DLX5/HAND1/HAND2/BATF3/MEF2C/PITX2/PDX1/CUX2/PAX2/PAX1/ETV1/ETS1/TAL1/TBX20/NKX2-2/SATB2/INSM1/PRRX1/HOXA7/NKX3-2/SOX21/HOXA2/HSF2/TP73/EBF2/ARID3B/HNF4G/PRDM5/PITX3/PPARA/MEIS1/GCFC2/OTX2/GCM1/NEUROG2/FLI1/SIX1/ZKSCAN3/RBBP4/ZIC3/RORB/…	98
MF	GO:0000978	RNA polymerase II proximal promoter sequence-specific DNA binding	95|2497	396|15258	4.872e-05	0.0063336	ENSG00000149948/ENSG00000148516/ENSG00000253293/ENSG00000106004/ENSG00000074047/ENSG00000196628/ENSG00000128573/ENSG00000108001/ENSG00000184486/ENSG00000181690/ENSG00000128714/ENSG00000140968/ENSG00000183072/ENSG00000103449/ENSG00000016082/ENSG00000138795/ENSG00000175745/ENSG00000120093/ENSG00000007372/ENSG00000122691/ENSG00000119866/ENSG00000170577/ENSG00000163623/ENSG00000081059/ENSG00000163064…	HMGA2/ZEB1/HOXA10/HOXA5/GLI2/TCF4/FOXP2/EBF3/POU3F2/PLAG1/HOXD13/IRF8/NKX2-5/SALL1/ISL1/LEF1/NR2F1/HOXB3/PAX6/TWIST1/BCL11A/SIX2/NKX6-1/TCF7/EN1/ZNF536/SOX6/DLX5/HAND1/HAND2/BATF3/MEF2C/PITX2/PDX1/CUX2/PAX1/ETV1/ETS1/TAL1/TBX20/SATB2/INSM1/PRRX1/HOXA7/NKX3-2/SOX21/HOXA2/HSF2/TP73/EBF2/ARID3B/HNF4G/PRDM5/PITX3/PPARA/MEIS1/GCFC2/OTX2/GCM1/NEUROG2/FLI1/SIX1/ZKSCAN3/RBBP4/ZIC3/RORB/KLF13/HDAC2/ATOH1/…	95
MF	GO:0015081	sodium ion transmembrane transporter activity	40|2497	136|15258	9.6681e-05	0.011172	ENSG00000079215/ENSG00000072041/ENSG00000183873/ENSG00000183023/ENSG00000197106/ENSG00000132164/ENSG00000164707/ENSG00000198689/ENSG00000108576/ENSG00000145248/ENSG00000080493/ENSG00000136531/ENSG00000140090/ENSG00000180881/ENSG00000181804/ENSG00000129244/ENSG00000177098/ENSG00000166257/ENSG00000106688/ENSG00000010379/ENSG00000148942/ENSG00000141485/ENSG00000007314/ENSG00000158865/ENSG00000169432…	SLC1A3/SLC6A15/SCN5A/SLC8A1/SLC6A17/SLC6A11/SLC13A4/SLC9A6/SLC6A4/SLC10A4/SLC4A4/SCN2A/SLC24A4/CAPS2/SLC9A9/ATP1B2/SCN4B/SCN3B/SLC1A1/SLC6A13/SLC5A12/SLC13A5/SCN4A/SLC5A11/SCN9A/SLC8A3/SCN2B/GRIK5/SLC6A1/SCN3A/SLC9A5/SLC9B2/SLC9B1/SLC4A5/ATP12A/SLC6A16/SLC23A2/GRIK4/SCN11A/SLC5A3	40
MF	GO:0001077	transcriptional activator activity, RNA polymerase II proximal promoter sequence-specific DNA binding	64|2497	255|15258	0.000211894	0.022037	ENSG00000149948/ENSG00000253293/ENSG00000106004/ENSG00000074047/ENSG00000196628/ENSG00000108001/ENSG00000184486/ENSG00000181690/ENSG00000128714/ENSG00000152192/ENSG00000183072/ENSG00000135457/ENSG00000016082/ENSG00000138795/ENSG00000120093/ENSG00000007372/ENSG00000170577/ENSG00000184937/ENSG00000163884/ENSG00000105880/ENSG00000164107/ENSG00000081189/ENSG00000164093/ENSG00000125813/ENSG00000006468…	HMGA2/HOXA10/HOXA5/GLI2/TCF4/EBF3/POU3F2/PLAG1/HOXD13/POU4F1/NKX2-5/TFCP2/ISL1/LEF1/HOXB3/PAX6/SIX2/WT1/KLF15/DLX5/HAND2/MEF2C/PITX2/PAX1/ETV1/ETS1/BARHL2/TBX20/SATB2/HOXA7/NR2E1/SOX21/HEYL/TP73/EBF2/ARID3B/HNF4G/PITX3/PPARA/MEIS1/OTX2/GCM1/FLI1/SIX1/FOXC2/ZIC3/RORB/KLF13/ATOH1/NR6A1/HLF/MEIS2/NKRF/NHLH2/ONECUT2/NKX2-8/TBX19/ELK3/MITF/TBPL1/MEOX1/HLTF/SIRT1/JUN	64
MF	GO:0046873	metal ion transmembrane transporter activity	92|2497	399|15258	0.000283682	0.0268209	ENSG00000079215/ENSG00000072041/ENSG00000184185/ENSG00000055732/ENSG00000153898/ENSG00000183873/ENSG00000182389/ENSG00000185760/ENSG00000148408/ENSG00000153956/ENSG00000183023/ENSG00000197106/ENSG00000132164/ENSG00000164707/ENSG00000162687/ENSG00000198689/ENSG00000108576/ENSG00000116396/ENSG00000138449/ENSG00000145248/ENSG00000080493/ENSG00000136531/ENSG00000140090/ENSG00000129159/ENSG00000182674…	SLC1A3/SLC6A15/KCNJ12/MCOLN3/MCOLN2/SCN5A/CACNB4/KCNQ5/CACNA1B/CACNA2D1/SLC8A1/SLC6A17/SLC6A11/SLC13A4/KCNT2/SLC9A6/SLC6A4/KCNC4/SLC40A1/SLC10A4/SLC4A4/SCN2A/SLC24A4/KCNC1/KCNB2/CAPS2/SLC9A9/ATP1B2/TRPC3/SCN4B/KCNQ2/GPM6A/KCNA3/CACNA2D3/SCN3B/SLC1A1/CACNG8/SLC6A13/KCNN1/SLC5A12/TRPV1/SLC13A5/TRPA1/SLC39A10/GALNT8/SLC30A4/SCN4A/KCNA2/SLC5A11/CACNB2/KCNG3/SCN9A/SLC8A3/SCN2B/TRPC1/SLC30A10/FKBP1B/SL…	92
