# Supplementary material for: A single cysteine residue in vimentin regulates long non-coding RNA XIST to suppress epithelial–mesenchymal transition and stemness in breast cancer
Source: eLife. 2025 Jul 21;14:RP104191. doi: 10.7554/eLife.104191 (PMC12279371; doi:10.7554/eLife.104191)
Supplement: Figure 3—figure supplement 2—source data 1. [file elife-104191-fig3-figsupp2-data1.xlsx]

## Sheet: Figure 3-figure supplement 2-so
All Downregulated Cellular Functions by DEGs
Category	GOID	Description	GeneRatio	BgRatio	pvalue	padj	geneID	geneName	Count
BP	GO:0007156	homophilic cell adhesion via plasma membrane adhesion molecules	73|2653	143|14725	2.28999e-19	1.29178e-15	ENSG00000039068/ENSG00000062038/ENSG00000143217/ENSG00000276547/ENSG00000198753/ENSG00000158258/ENSG00000156453/ENSG00000112852/ENSG00000171587/ENSG00000149573/ENSG00000085552/ENSG00000165731/ENSG00000113205/ENSG00000081842/ENSG00000139211/ENSG00000249158/ENSG00000081853/ENSG00000251664/ENSG00000187372/ENSG00000120327/ENSG00000272674/ENSG00000177103/ENSG00000243232/ENSG00000196576/ENSG00000204963…	CDH1/CDH3/NECTIN4/PCDHGB5/PLXNB3/CLSTN2/PCDH1/PCDHB2/DSCAM/MPZL2/IGSF9/RET/PCDHB3/PCDHA6/AMIGO2/PCDHA11/PCDHGA2/PCDHA12/PCDHB13/PCDHB14/PCDHB16/DSCAML1/PCDHAC2/PLXNB2/PCDHA7/CDH13/PCDHGA1/CELSR2/PCDHGB1/CDH24/PCDHA13/PCDHGB2/PCDHAC1/PCDHB9/PCDHB8/PCDHA10/PCDHB4/NECTIN2/PCDHGA3/SMAGP/PCDHGA5/PCDHA1/PCDHGA4/PCDHGA9/NECTIN1/CDHR2/PCDHB11/PCDHGA12/PCDHB10/PCDHGB3/PCDHB6/PCDHB15/CELSR3/PCDHA3/PCDHA2/P…	73
BP	GO:0098742	cell-cell adhesion via plasma-membrane adhesion molecules	92|2653	209|14725	1.89862e-18	5.35506e-15	ENSG00000039068/ENSG00000165215/ENSG00000181885/ENSG00000189143/ENSG00000062038/ENSG00000143217/ENSG00000213937/ENSG00000276547/ENSG00000163347/ENSG00000198753/ENSG00000158258/ENSG00000090339/ENSG00000156453/ENSG00000112852/ENSG00000171587/ENSG00000149573/ENSG00000085552/ENSG00000165731/ENSG00000197971/ENSG00000113205/ENSG00000081842/ENSG00000139211/ENSG00000249158/ENSG00000136826/ENSG00000081853…	CDH1/CLDN3/CLDN7/CLDN4/CDH3/NECTIN4/CLDN9/PCDHGB5/CLDN1/PLXNB3/CLSTN2/ICAM1/PCDH1/PCDHB2/DSCAM/MPZL2/IGSF9/RET/MBP/PCDHB3/PCDHA6/AMIGO2/PCDHA11/KLF4/PCDHGA2/TGFB2/PCDHA12/TENM4/PCDHB13/PCDHB14/PCDHB16/DSCAML1/PCDHAC2/PLXNB2/PCDHA7/CDH13/PCDHGA1/MAG/CELSR2/PCDHGB1/CDH24/PCDHA13/PCDHGB2/PCDHAC1/PCDHB9/PCDHB8/PCDHA10/PCDHB4/NECTIN2/ITGAM/PCDHGA3/SMAGP/PCDHGA5/PCDHA1/PCDHGA4/PCDHGA9/NECTIN1/CDHR2/PCD…	92
BP	GO:0030216	keratinocyte differentiation	63|2653	154|14725	2.2626e-11	4.25443e-08	ENSG00000171345/ENSG00000167767/ENSG00000170421/ENSG00000184363/ENSG00000149418/ENSG00000118898/ENSG00000111057/ENSG00000052344/ENSG00000205426/ENSG00000062038/ENSG00000175793/ENSG00000170442/ENSG00000124151/ENSG00000167880/ENSG00000117595/ENSG00000075426/ENSG00000165272/ENSG00000144452/ENSG00000081277/ENSG00000173801/ENSG00000175707/ENSG00000196139/ENSG00000159216/ENSG00000135480/ENSG00000171346…	KRT19/KRT80/KRT8/PKP3/ST14/PPL/KRT18/PRSS8/KRT81/CDH3/SFN/KRT86/NCOA3/EVPL/IRF6/FOSL2/AQP3/ABCA12/PKP1/JUP/KDF1/AKR1C3/RUNX1/KRT7/KRT15/KRT83/GRHL1/CSTA/TP63/GRHL2/KRT17/TCHH/TXNIP/KRT24/ZFP36L1/KRT13/IL20/CAPN1/VDR/MSX2/KRT16/JAG1/EPHA2/BCL11B/OVOL2/DNASE1L2/PKP2/NUMA1/KRT6B/PRKCH/DSP/KRT4/NOTCH1/IVL/FURIN/FOXN1/SHARPIN/FLNB/CAPNS1/TMEM79/KRTAP4-1/KRT85/TRIM16	63
BP	GO:0008544	epidermis development	101|2653	303|14725	7.35616e-11	1.0374e-07	ENSG00000171345/ENSG00000167767/ENSG00000170421/ENSG00000184363/ENSG00000149418/ENSG00000163435/ENSG00000118898/ENSG00000111057/ENSG00000052344/ENSG00000205426/ENSG00000107984/ENSG00000062038/ENSG00000143320/ENSG00000175793/ENSG00000170442/ENSG00000088002/ENSG00000124151/ENSG00000158055/ENSG00000164690/ENSG00000103089/ENSG00000167880/ENSG00000117595/ENSG00000196878/ENSG00000075426/ENSG00000165272…	KRT19/KRT80/KRT8/PKP3/ST14/ELF3/PPL/KRT18/PRSS8/KRT81/DKK1/CDH3/CRABP2/SFN/KRT86/SULT2B1/NCOA3/GRHL3/SHH/FA2H/EVPL/IRF6/LAMB3/FOSL2/AQP3/ABCA12/SLC9A3R1/PKP1/JUP/KDF1/AKR1C3/RUNX1/OVOL1/KLF4/KRT7/KRT15/TGFB2/SLITRK6/KRT83/CALML5/GRHL1/ZNF750/CSTA/TP63/IGFBP5/GRHL2/KRT17/LAMA5/TCHH/TXNIP/EDA2R/PDGFA/KRT24/CST6/PLOD3/ZFP36L1/KRT13/IL20/CAPN1/HOXC13/VDR/MSX2/GNAS/KRT16/WAS/MYCN/NAB2/JAG1/EPHA2/JAG2/…	101
BP	GO:0034330	cell junction organization	85|2653	246|14725	3.158e-10	3.56286e-07	ENSG00000039068/ENSG00000137801/ENSG00000165215/ENSG00000184363/ENSG00000062038/ENSG00000132470/ENSG00000143217/ENSG00000213937/ENSG00000189058/ENSG00000140832/ENSG00000163347/ENSG00000141376/ENSG00000130545/ENSG00000196878/ENSG00000124171/ENSG00000010278/ENSG00000173156/ENSG00000124429/ENSG00000173801/ENSG00000248905/ENSG00000102981/ENSG00000159216/ENSG00000124145/ENSG00000092969/ENSG00000099250…	CDH1/THBS1/CLDN3/PKP3/CDH3/ITGB4/NECTIN4/CLDN9/APOD/MARVELD3/CLDN1/BCAS3/CRB3/LAMB3/PARD6B/CD9/RHOD/POF1B/JUP/FMN1/PARD6A/RUNX1/SDC4/TGFB2/NRP1/PLEC/PLEKHA7/CDH13/WNT4/GRHL1/MICALL2/GRHL2/HIPK1/CDH24/SLC9A1/LAMA5/VASP/EPB41L5/GJB2/CAV1/DMTN/NECTIN2/RHOC/PTPRJ/FLNA/F11R/TGFB3/VMP1/FN1/NECTIN1/WDR1/TRIP6/LSR/SMAD3/PTPRK/LAMC2/PKP2/CDH18/FBLIM1/CTTN/MARVELD2/PRKCH/DSP/CAMSAP3/MYO1C/MPP7/ACTB/ACTN1/G…	85
BP	GO:0009913	epidermal cell differentiation	73|2653	201|14725	4.49754e-10	4.22844e-07	ENSG00000171345/ENSG00000167767/ENSG00000170421/ENSG00000184363/ENSG00000149418/ENSG00000118898/ENSG00000111057/ENSG00000052344/ENSG00000205426/ENSG00000062038/ENSG00000175793/ENSG00000170442/ENSG00000088002/ENSG00000124151/ENSG00000103089/ENSG00000167880/ENSG00000117595/ENSG00000075426/ENSG00000165272/ENSG00000144452/ENSG00000109062/ENSG00000081277/ENSG00000173801/ENSG00000175707/ENSG00000196139…	KRT19/KRT80/KRT8/PKP3/ST14/PPL/KRT18/PRSS8/KRT81/CDH3/SFN/KRT86/SULT2B1/NCOA3/FA2H/EVPL/IRF6/FOSL2/AQP3/ABCA12/SLC9A3R1/PKP1/JUP/KDF1/AKR1C3/RUNX1/KLF4/KRT7/KRT15/SLITRK6/KRT83/GRHL1/CSTA/TP63/GRHL2/KRT17/TCHH/TXNIP/KRT24/ZFP36L1/KRT13/IL20/CAPN1/VDR/MSX2/KRT16/MYCN/JAG1/EPHA2/JAG2/BCL11B/OVOL2/DNASE1L2/PKP2/MAFF/NUMA1/KRT6B/PRKCH/DSP/KRT4/NOTCH1/IVL/FURIN/PTPRQ/FOXN1/HES1/SHARPIN/FLNB/CAPNS1/TME…	73
BP	GO:0043588	skin development	86|2653	256|14725	1.22473e-09	9.86954e-07	ENSG00000171345/ENSG00000167767/ENSG00000170421/ENSG00000184363/ENSG00000149418/ENSG00000189143/ENSG00000118898/ENSG00000111057/ENSG00000052344/ENSG00000205426/ENSG00000107984/ENSG00000062038/ENSG00000175793/ENSG00000170442/ENSG00000132470/ENSG00000124151/ENSG00000158055/ENSG00000164690/ENSG00000163347/ENSG00000103089/ENSG00000167880/ENSG00000117595/ENSG00000075426/ENSG00000165272/ENSG00000168542…	KRT19/KRT80/KRT8/PKP3/ST14/CLDN4/PPL/KRT18/PRSS8/KRT81/DKK1/CDH3/SFN/KRT86/ITGB4/NCOA3/GRHL3/SHH/CLDN1/FA2H/EVPL/IRF6/FOSL2/AQP3/COL3A1/ABCA12/PKP1/JUP/KDF1/AKR1C3/ITGA3/RUNX1/OVOL1/KRT7/KRT15/TGFB2/KRT83/GRHL1/CSTA/TP63/IGFBP5/GRHL2/KRT17/LAMA5/TCHH/TXNIP/PDGFA/KRT24/GJB3/ZFP36L1/KRT13/IL20/CAPN1/HOXC13/VDR/MSX2/GNAS/KRT16/JAG1/EPHA2/BCL11B/OVOL2/DNASE1L2/PKP2/TRADD/NUMA1/KRT6B/PRKCH/CELSR1/DSP/…	86
BP	GO:0045216	cell-cell junction organization	73|2653	214|14725	1.03873e-08	7.32432e-06	ENSG00000039068/ENSG00000137801/ENSG00000165215/ENSG00000184363/ENSG00000062038/ENSG00000143217/ENSG00000213937/ENSG00000189058/ENSG00000140832/ENSG00000163347/ENSG00000141376/ENSG00000130545/ENSG00000124171/ENSG00000010278/ENSG00000173156/ENSG00000124429/ENSG00000173801/ENSG00000248905/ENSG00000102981/ENSG00000159216/ENSG00000124145/ENSG00000092969/ENSG00000099250/ENSG00000166689/ENSG00000140945…	CDH1/THBS1/CLDN3/PKP3/CDH3/NECTIN4/CLDN9/APOD/MARVELD3/CLDN1/BCAS3/CRB3/PARD6B/CD9/RHOD/POF1B/JUP/FMN1/PARD6A/RUNX1/SDC4/TGFB2/NRP1/PLEKHA7/CDH13/WNT4/GRHL1/MICALL2/GRHL2/HIPK1/CDH24/SLC9A1/LAMA5/EPB41L5/GJB2/CAV1/DMTN/NECTIN2/RHOC/PTPRJ/F11R/TGFB3/NECTIN1/WDR1/TRIP6/LSR/SMAD3/PTPRK/PKP2/CDH18/CTTN/MARVELD2/PRKCH/DSP/CAMSAP3/MYO1C/MPP7/ACTN1/GJD3/CTNNA1/VEGFA/TRPV4/CDH11/S100A10/INAVA/COL16A1/CLD…	73
BP	GO:0034329	cell junction assembly	67|2653	194|14725	2.3866e-08	1.49587e-05	ENSG00000137801/ENSG00000165215/ENSG00000184363/ENSG00000132470/ENSG00000189058/ENSG00000140832/ENSG00000163347/ENSG00000141376/ENSG00000130545/ENSG00000196878/ENSG00000124171/ENSG00000010278/ENSG00000173156/ENSG00000124429/ENSG00000173801/ENSG00000248905/ENSG00000102981/ENSG00000159216/ENSG00000124145/ENSG00000099250/ENSG00000178209/ENSG00000162552/ENSG00000164877/ENSG00000083307/ENSG00000163349…	THBS1/CLDN3/PKP3/ITGB4/APOD/MARVELD3/CLDN1/BCAS3/CRB3/LAMB3/PARD6B/CD9/RHOD/POF1B/JUP/FMN1/PARD6A/RUNX1/SDC4/NRP1/PLEC/WNT4/MICALL2/GRHL2/HIPK1/SLC9A1/LAMA5/VASP/EPB41L5/GJB2/CAV1/DMTN/RHOC/PTPRJ/FLNA/F11R/VMP1/FN1/WDR1/TRIP6/LSR/SMAD3/PTPRK/LAMC2/PKP2/FBLIM1/CTTN/MARVELD2/PRKCH/CAMSAP3/MYO1C/MPP7/ACTB/ACTN1/GJD3/CTNNA1/VEGFA/TRPV4/S100A10/COL16A1/CD151/OPHN1/SNAI1/SMAD7/HDAC7/FZD5/CDH5	67
BP	GO:0022612	gland morphogenesis	45|2653	112|14725	3.04825e-08	1.71952e-05	ENSG00000091831/ENSG00000103067/ENSG00000129514/ENSG00000163435/ENSG00000164690/ENSG00000121068/ENSG00000163235/ENSG00000196562/ENSG00000109062/ENSG00000082175/ENSG00000100219/ENSG00000075223/ENSG00000092969/ENSG00000099250/ENSG00000101144/ENSG00000185737/ENSG00000162552/ENSG00000186350/ENSG00000073282/ENSG00000115461/ENSG00000074527/ENSG00000169083/ENSG00000130702/ENSG00000172819/ENSG00000086062…	ESR1/ESRP2/FOXA1/ELF3/SHH/TBX2/TGFA/SULF2/SLC9A3R1/PGR/XBP1/SEMA3C/TGFB2/NRP1/BMP7/NRG3/WNT4/RXRA/TP63/IGFBP5/NTN4/AR/LAMA5/RARG/B4GALT1/PDGFA/PLXND1/CAV1/CEBPB/HPN/ETV5/AREG/CAPN1/CRIP1/VDR/MSX2/TGFB3/EPHA2/SERPINB5/LRP5/NOTCH1/TGM2/DAG1/KDM5B/DDR1	45
BP	GO:0070268	cornification	32|2653	68|14725	3.61618e-08	1.85444e-05	ENSG00000171345/ENSG00000167767/ENSG00000170421/ENSG00000184363/ENSG00000149418/ENSG00000118898/ENSG00000111057/ENSG00000052344/ENSG00000205426/ENSG00000170442/ENSG00000167880/ENSG00000081277/ENSG00000173801/ENSG00000135480/ENSG00000171346/ENSG00000170523/ENSG00000121552/ENSG00000128422/ENSG00000159450/ENSG00000167916/ENSG00000171401/ENSG00000014216/ENSG00000186832/ENSG00000057294/ENSG00000185479…	KRT19/KRT80/KRT8/PKP3/ST14/PPL/KRT18/PRSS8/KRT81/KRT86/EVPL/PKP1/JUP/KRT7/KRT15/KRT83/CSTA/KRT17/TCHH/KRT24/KRT13/CAPN1/KRT16/PKP2/KRT6B/DSP/KRT4/IVL/FURIN/CAPNS1/TMEM79/KRT85	32
BP	GO:0034341	response to interferon-gamma	55|2653	151|14725	5.49116e-08	2.5813e-05	ENSG00000115919/ENSG00000142089/ENSG00000184557/ENSG00000163347/ENSG00000026508/ENSG00000117595/ENSG00000090339/ENSG00000111331/ENSG00000128604/ENSG00000138496/ENSG00000173193/ENSG00000135114/ENSG00000078401/ENSG00000130303/ENSG00000067066/ENSG00000139832/ENSG00000185338/ENSG00000162645/ENSG00000111335/ENSG00000148180/ENSG00000089127/ENSG00000125148/ENSG00000198502/ENSG00000161921/ENSG00000018280…	KYNU/IFITM3/SOCS3/CLDN1/CD44/IRF6/ICAM1/OAS3/IRF5/PARP9/PARP14/OASL/EDN1/BST2/SP100/RAB20/SOCS1/GBP2/OAS2/GSN/OAS1/MT2A/HLA-DRB5/CXCL16/SLC11A1/TRIM5/CAMK2B/PRKCD/IFITM2/NMI/CCL2/IRF2/NR1H2/C19orf66/RAB43/WAS/TRIM25/CCL22/IFITM1/ASS1/HCK/VIM/HLA-DRB1/TRIM8/CCL20/CCL26/MYO1C/CIITA/IRF1/ZYX/IRF3/FLNB/STXBP2/RPL13A/GCH1	55
BP	GO:0031424	keratinization	37|2653	87|14725	8.88868e-08	3.857e-05	ENSG00000171345/ENSG00000167767/ENSG00000170421/ENSG00000184363/ENSG00000149418/ENSG00000118898/ENSG00000111057/ENSG00000052344/ENSG00000205426/ENSG00000062038/ENSG00000175793/ENSG00000170442/ENSG00000167880/ENSG00000144452/ENSG00000081277/ENSG00000173801/ENSG00000135480/ENSG00000171346/ENSG00000170523/ENSG00000121552/ENSG00000128422/ENSG00000159450/ENSG00000167916/ENSG00000171401/ENSG00000014216…	KRT19/KRT80/KRT8/PKP3/ST14/PPL/KRT18/PRSS8/KRT81/CDH3/SFN/KRT86/EVPL/ABCA12/PKP1/JUP/KRT7/KRT15/KRT83/CSTA/KRT17/TCHH/KRT24/KRT13/CAPN1/KRT16/PKP2/KRT6B/DSP/KRT4/IVL/FURIN/SHARPIN/CAPNS1/TMEM79/KRTAP4-1/KRT85	37
BP	GO:0051271	negative regulation of cellular component movement	80|2653	254|14725	1.12395e-07	4.5287e-05	ENSG00000137801/ENSG00000184292/ENSG00000107485/ENSG00000205336/ENSG00000146674/ENSG00000167642/ENSG00000189058/ENSG00000164690/ENSG00000140832/ENSG00000159167/ENSG00000138061/ENSG00000198753/ENSG00000107562/ENSG00000168542/ENSG00000001617/ENSG00000010278/ENSG00000178568/ENSG00000109062/ENSG00000134830/ENSG00000173801/ENSG00000130303/ENSG00000136826/ENSG00000171522/ENSG00000099250/ENSG00000067066…	THBS1/TACSTD2/GATA3/ADGRG1/IGFBP3/SPINT2/APOD/SHH/MARVELD3/STC1/CYP1B1/PLXNB3/CXCL12/COL3A1/SEMA3F/CD9/ERBB4/SLC9A3R1/C5AR2/JUP/BST2/KLF4/PTGER4/NRP1/SP100/EPHA1/SEMA5A/NRG3/WNT4/CNIH2/ARHGAP4/IDH2/IGFBP5/ZMYND8/TP53INP1/GPR173/CERS2/PADI2/CORO1B/RRAS/TPM1/SRGAP1/PTPRJ/RHOB/CCL2/SLURP1/KRT16/WAS/ADAM15/LDLRAD4/C16orf45/CDKN1B/IFITM1/CCL28/IL24/NOV/JAG1/PTPRK/CITED2/CHRD/PLXNA3/NR2F2/ABR/NDRG4/CNN…	80
BP	GO:0046718	viral entry into host cell	40|2653	101|14725	2.77166e-07	0.000104233	ENSG00000184012/ENSG00000118640/ENSG00000143217/ENSG00000213937/ENSG00000142089/ENSG00000163347/ENSG00000100097/ENSG00000090339/ENSG00000115221/ENSG00000148180/ENSG00000132256/ENSG00000121966/ENSG00000105974/ENSG00000130202/ENSG00000185201/ENSG00000130164/ENSG00000198373/ENSG00000158769/ENSG00000121060/ENSG00000110400/ENSG00000185885/ENSG00000082781/ENSG00000142627/ENSG00000123124/ENSG00000196126…	TMPRSS2/VAMP8/NECTIN4/CLDN9/IFITM3/CLDN1/LGALS1/ICAM1/ITGB6/GSN/TRIM5/CXCR4/CAV1/NECTIN2/IFITM2/LDLR/WWP2/F11R/TRIM25/NECTIN1/IFITM1/ITGB5/EPHA2/WWP1/HLA-DRB1/TRIM8/ANPEP/ITGB7/VPS18/GRK2/LAMP1/DAG1/CLDN6/SLC1A5/SCARB1/EFNB2/CAV2/HS3ST5/P4HB/CTSB	40
BP	GO:0035767	endothelial cell chemotaxis	15|2653	22|14725	3.12425e-07	0.000110149	ENSG00000137801/ENSG00000106211/ENSG00000205542/ENSG00000179388/ENSG00000099250/ENSG00000112902/ENSG00000172725/ENSG00000171680/ENSG00000136999/ENSG00000135124/ENSG00000148400/ENSG00000112715/ENSG00000156427/ENSG00000105287/ENSG00000123358	THBS1/HSPB1/TMSB4X/EGR3/NRP1/SEMA5A/CORO1B/PLEKHG5/NOV/P2RX4/NOTCH1/VEGFA/FGF18/PRKD2/NR4A1	15
BP	GO:0030260	entry into host cell	44|2653	117|14725	4.07943e-07	0.00011506	ENSG00000039068/ENSG00000184012/ENSG00000118640/ENSG00000143217/ENSG00000213937/ENSG00000142089/ENSG00000163347/ENSG00000100097/ENSG00000090339/ENSG00000115221/ENSG00000148180/ENSG00000132256/ENSG00000121966/ENSG00000105974/ENSG00000130202/ENSG00000185201/ENSG00000169429/ENSG00000130164/ENSG00000198373/ENSG00000158769/ENSG00000121060/ENSG00000110400/ENSG00000185885/ENSG00000082781/ENSG00000142627…	CDH1/TMPRSS2/VAMP8/NECTIN4/CLDN9/IFITM3/CLDN1/LGALS1/ICAM1/ITGB6/GSN/TRIM5/CXCR4/CAV1/NECTIN2/IFITM2/CXCL8/LDLR/WWP2/F11R/TRIM25/NECTIN1/IFITM1/ITGB5/EPHA2/WWP1/HLA-DRB1/TRIM8/ANPEP/ITGB7/VPS18/GRK2/UBC/GRB2/LAMP1/DAG1/CLDN6/SLC1A5/SCARB1/EFNB2/CAV2/HS3ST5/P4HB/CTSB	44
BP	GO:0044409	entry into host	44|2653	117|14725	4.07943e-07	0.00011506	ENSG00000039068/ENSG00000184012/ENSG00000118640/ENSG00000143217/ENSG00000213937/ENSG00000142089/ENSG00000163347/ENSG00000100097/ENSG00000090339/ENSG00000115221/ENSG00000148180/ENSG00000132256/ENSG00000121966/ENSG00000105974/ENSG00000130202/ENSG00000185201/ENSG00000169429/ENSG00000130164/ENSG00000198373/ENSG00000158769/ENSG00000121060/ENSG00000110400/ENSG00000185885/ENSG00000082781/ENSG00000142627…	CDH1/TMPRSS2/VAMP8/NECTIN4/CLDN9/IFITM3/CLDN1/LGALS1/ICAM1/ITGB6/GSN/TRIM5/CXCR4/CAV1/NECTIN2/IFITM2/CXCL8/LDLR/WWP2/F11R/TRIM25/NECTIN1/IFITM1/ITGB5/EPHA2/WWP1/HLA-DRB1/TRIM8/ANPEP/ITGB7/VPS18/GRK2/UBC/GRB2/LAMP1/DAG1/CLDN6/SLC1A5/SCARB1/EFNB2/CAV2/HS3ST5/P4HB/CTSB	44
BP	GO:0051806	entry into cell of other organism involved in symbiotic interaction	44|2653	117|14725	4.07943e-07	0.00011506	ENSG00000039068/ENSG00000184012/ENSG00000118640/ENSG00000143217/ENSG00000213937/ENSG00000142089/ENSG00000163347/ENSG00000100097/ENSG00000090339/ENSG00000115221/ENSG00000148180/ENSG00000132256/ENSG00000121966/ENSG00000105974/ENSG00000130202/ENSG00000185201/ENSG00000169429/ENSG00000130164/ENSG00000198373/ENSG00000158769/ENSG00000121060/ENSG00000110400/ENSG00000185885/ENSG00000082781/ENSG00000142627…	CDH1/TMPRSS2/VAMP8/NECTIN4/CLDN9/IFITM3/CLDN1/LGALS1/ICAM1/ITGB6/GSN/TRIM5/CXCR4/CAV1/NECTIN2/IFITM2/CXCL8/LDLR/WWP2/F11R/TRIM25/NECTIN1/IFITM1/ITGB5/EPHA2/WWP1/HLA-DRB1/TRIM8/ANPEP/ITGB7/VPS18/GRK2/UBC/GRB2/LAMP1/DAG1/CLDN6/SLC1A5/SCARB1/EFNB2/CAV2/HS3ST5/P4HB/CTSB	44
BP	GO:0051828	entry into other organism involved in symbiotic interaction	44|2653	117|14725	4.07943e-07	0.00011506	ENSG00000039068/ENSG00000184012/ENSG00000118640/ENSG00000143217/ENSG00000213937/ENSG00000142089/ENSG00000163347/ENSG00000100097/ENSG00000090339/ENSG00000115221/ENSG00000148180/ENSG00000132256/ENSG00000121966/ENSG00000105974/ENSG00000130202/ENSG00000185201/ENSG00000169429/ENSG00000130164/ENSG00000198373/ENSG00000158769/ENSG00000121060/ENSG00000110400/ENSG00000185885/ENSG00000082781/ENSG00000142627…	CDH1/TMPRSS2/VAMP8/NECTIN4/CLDN9/IFITM3/CLDN1/LGALS1/ICAM1/ITGB6/GSN/TRIM5/CXCR4/CAV1/NECTIN2/IFITM2/CXCL8/LDLR/WWP2/F11R/TRIM25/NECTIN1/IFITM1/ITGB5/EPHA2/WWP1/HLA-DRB1/TRIM8/ANPEP/ITGB7/VPS18/GRK2/UBC/GRB2/LAMP1/DAG1/CLDN6/SLC1A5/SCARB1/EFNB2/CAV2/HS3ST5/P4HB/CTSB	44
BP	GO:1990778	protein localization to cell periphery	77|2653	252|14725	7.46907e-07	0.000200634	ENSG00000039068/ENSG00000184363/ENSG00000111057/ENSG00000137501/ENSG00000106541/ENSG00000118640/ENSG00000064270/ENSG00000176884/ENSG00000124507/ENSG00000130545/ENSG00000144452/ENSG00000167964/ENSG00000109062/ENSG00000173801/ENSG00000130762/ENSG00000005884/ENSG00000099282/ENSG00000168899/ENSG00000129682/ENSG00000167535/ENSG00000164850/ENSG00000162552/ENSG00000151025/ENSG00000122679/ENSG00000172794…	CDH1/PKP3/KRT18/SYTL2/AGR2/VAMP8/ATP2C2/GRIN1/PACSIN1/CRB3/ABCA12/RAB26/SLC9A3R1/JUP/ARHGEF16/ITGA3/TSPAN15/VAMP5/FGF13/CACNB3/GPER1/WNT4/GPR158/RAMP3/RAB37/PIK3R1/AR/GOLGA7B/LAMA5/ANXA2/EMP2/SAPCD2/TULP1/ATP1B1/LRRC15/PACS1/CAV1/TSPAN14/TNFRSF1A/AKT1/FLNA/PLEKHF1/TMEM150A/F11R/CIB1/EFR3B/EPHA2/PID1/PKP2/SNAP25/BCL2L1/RAB40C/NUMA1/LIN7B/PRKCH/STX1B/TMEM88/PACS2/VIL1/AP2M1/ARFRP1/S100A10/MAP7/LYPD…	77
BP	GO:0050900	leukocyte migration	93|2653	323|14725	1.07964e-06	0.00027683	ENSG00000137801/ENSG00000198910/ENSG00000107485/ENSG00000124126/ENSG00000119888/ENSG00000189334/ENSG00000100311/ENSG00000131981/ENSG00000172936/ENSG00000111679/ENSG00000189058/ENSG00000141738/ENSG00000026508/ENSG00000107562/ENSG00000090339/ENSG00000178726/ENSG00000163220/ENSG00000115594/ENSG00000134830/ENSG00000165731/ENSG00000141526/ENSG00000005884/ENSG00000078401/ENSG00000104689/ENSG00000124145…	THBS1/L1CAM/GATA3/PREX1/EPCAM/S100A14/PDGFB/LGALS3/MYD88/PTPN6/APOD/GRB7/CD44/CXCL12/ICAM1/THBD/S100A9/IL1R1/C5AR2/RET/SLC16A3/ITGA3/EDN1/TNFRSF10A/SDC4/PTGER4/TGFB2/TRPM4/SDC1/HSD3B7/ZP3/MAG/CORO1A/TNFRSF18/ARHGEF5/PIK3R1/B4GALT1/DOCK8/CXCL16/CEACAM6/S100A8/EDN2/ATP1B1/PADI2/SLC7A5/CXCR4/CAV1/CCR7/FFAR2/ARTN/ITGAM/MMP9/CXCL8/CCL2/GCNT1/CEACAM5/F11R/IL17RC/MYH9/CCL22/FN1/SLC3A2/WDR1/CCL28/NOV/HCK…	93
BP	GO:0040013	negative regulation of locomotion	79|2653	264|14725	1.3501e-06	0.000331126	ENSG00000137801/ENSG00000184292/ENSG00000107485/ENSG00000205336/ENSG00000146674/ENSG00000167642/ENSG00000189058/ENSG00000164690/ENSG00000140832/ENSG00000159167/ENSG00000138061/ENSG00000198753/ENSG00000107562/ENSG00000168542/ENSG00000001617/ENSG00000178568/ENSG00000109062/ENSG00000134830/ENSG00000173801/ENSG00000130303/ENSG00000136826/ENSG00000171522/ENSG00000099250/ENSG00000067066/ENSG00000146904…	THBS1/TACSTD2/GATA3/ADGRG1/IGFBP3/SPINT2/APOD/SHH/MARVELD3/STC1/CYP1B1/PLXNB3/CXCL12/COL3A1/SEMA3F/ERBB4/SLC9A3R1/C5AR2/JUP/BST2/KLF4/PTGER4/NRP1/SP100/EPHA1/SEMA5A/NRG3/WNT4/ARHGAP4/IDH2/IGFBP5/ZMYND8/TP53INP1/GPR173/TRIM5/CERS2/PADI2/CORO1B/RRAS/TPM1/SRGAP1/PTPRJ/RHOB/CCL2/SLURP1/KRT16/WAS/TRIM25/ADAM15/LDLRAD4/C16orf45/IFITM1/CCL28/IL24/NOV/JAG1/PTPRK/CITED2/CHRD/PLXNA3/NR2F2/ABR/NDRG4/TRIM8/C…	79
BP	GO:0045785	positive regulation of cell adhesion	90|2653	315|14725	2.28336e-06	0.000536685	ENSG00000129514/ENSG00000107485/ENSG00000205336/ENSG00000124126/ENSG00000092929/ENSG00000106541/ENSG00000111679/ENSG00000161905/ENSG00000164690/ENSG00000100097/ENSG00000026508/ENSG00000107562/ENSG00000090339/ENSG00000173156/ENSG00000165731/ENSG00000173801/ENSG00000131669/ENSG00000179388/ENSG00000005884/ENSG00000100219/ENSG00000248905/ENSG00000124145/ENSG00000168743/ENSG00000092969/ENSG00000099250…	FOXA1/GATA3/ADGRG1/PREX1/UNC13D/AGR2/PTPN6/ALOX15/SHH/LGALS1/CD44/CXCL12/ICAM1/RHOD/RET/JUP/NINJ1/EGR3/ITGA3/XBP1/FMN1/SDC4/NPNT/TGFB2/NRP1/RARA/EPHA1/IGFBP2/BMP7/CDH13/PIEZO1/WNT4/ZP3/BCL6/SOCS1/CORO1A/VTCN1/TNFRSF18/PIK3R1/DOCK8/EMP2/HLA-DRB5/SMOC2/PODXL/EPB41L5/MAP3K8/FSTL3/CAV1/CCR7/ZMIZ1/DMTN/AKT1/TPM1/PTPRJ/FLNA/CCL2/MYB/FN1/CIB1/CCL28/SMAD3/HLA-DRB1/CITED2/CHRD/CD47/RASGRP1/VEGFA/HES1/MAP3…	90
BP	GO:0002064	epithelial cell development	59|2653	184|14725	2.65105e-06	0.000598183	ENSG00000124664/ENSG00000091831/ENSG00000165215/ENSG00000129514/ENSG00000149418/ENSG00000188064/ENSG00000132698/ENSG00000175793/ENSG00000100311/ENSG00000172936/ENSG00000167642/ENSG00000163347/ENSG00000159167/ENSG00000143552/ENSG00000075426/ENSG00000090339/ENSG00000125968/ENSG00000109062/ENSG00000124429/ENSG00000124762/ENSG00000175707/ENSG00000082175/ENSG00000100219/ENSG00000184564/ENSG00000115884…	SPDEF/ESR1/CLDN3/FOXA1/ST14/WNT7B/RAB25/SFN/PDGFB/MYD88/SPINT2/CLDN1/STC1/NUP210L/FOSL2/ICAM1/ID1/SLC9A3R1/POF1B/CDKN1A/KDF1/PGR/XBP1/SLITRK6/SDC1/RARA/S1PR3/TP63/SHROOM3/GRHL2/AR/RARG/B4GALT1/COL18A1/PODXL/EPB41L5/PLOD3/TNFRSF1A/GSTM3/F11R/JAG1/EPHA2/VIM/BCL11B/DNASE1L2/LAMB2/MARVELD2/NOTCH1/SIPA1L3/TJP2/CST3/FLNB/MYADM/TMEM79/ONECUT1/SLC9A4/CCM2/NPHS1/CDH5	59
BP	GO:0034340	response to type I interferon	31|2653	76|14725	2.84022e-06	0.000600824	ENSG00000169871/ENSG00000172936/ENSG00000111679/ENSG00000142089/ENSG00000187608/ENSG00000117595/ENSG00000263528/ENSG00000157601/ENSG00000111331/ENSG00000128604/ENSG00000135114/ENSG00000130303/ENSG00000067066/ENSG00000162645/ENSG00000111335/ENSG00000089127/ENSG00000126709/ENSG00000120738/ENSG00000172183/ENSG00000119922/ENSG00000185201/ENSG00000168310/ENSG00000130813/ENSG00000185885/ENSG00000119917…	TRIM56/MYD88/PTPN6/IFITM3/ISG15/IRF6/IKBKE/MX1/OAS3/IRF5/OASL/BST2/SP100/GBP2/OAS2/OAS1/IFI6/EGR1/ISG20/IFIT2/IFITM2/IRF2/C19orf66/IFITM1/IFIT3/IRF1/RSAD2/MX2/IRF3/PTPN1/IFI35	31
BP	GO:0045682	regulation of epidermis development	29|2653	69|14725	2.87577e-06	0.000600824	ENSG00000062038/ENSG00000175793/ENSG00000088002/ENSG00000124151/ENSG00000165272/ENSG00000175707/ENSG00000159216/ENSG00000092969/ENSG00000134317/ENSG00000073282/ENSG00000083307/ENSG00000128422/ENSG00000185650/ENSG00000162891/ENSG00000111424/ENSG00000120149/ENSG00000134323/ENSG00000166886/ENSG00000125850/ENSG00000185022/ENSG00000102871/ENSG00000137497/ENSG00000027075/ENSG00000148400/ENSG00000109101…	CDH3/SFN/SULT2B1/NCOA3/AQP3/KDF1/RUNX1/TGFB2/GRHL1/TP63/GRHL2/KRT17/ZFP36L1/IL20/VDR/MSX2/MYCN/NAB2/OVOL2/MAFF/TRADD/NUMA1/PRKCH/NOTCH1/FOXN1/HES1/INHBA/TMEM79/TRIM16	29
BP	GO:2000146	negative regulation of cell motility	72|2653	239|14725	2.9934e-06	0.000603064	ENSG00000137801/ENSG00000184292/ENSG00000107485/ENSG00000205336/ENSG00000146674/ENSG00000167642/ENSG00000189058/ENSG00000164690/ENSG00000140832/ENSG00000159167/ENSG00000138061/ENSG00000198753/ENSG00000107562/ENSG00000168542/ENSG00000178568/ENSG00000109062/ENSG00000134830/ENSG00000173801/ENSG00000130303/ENSG00000136826/ENSG00000171522/ENSG00000067066/ENSG00000146904/ENSG00000185737/ENSG00000162552…	THBS1/TACSTD2/GATA3/ADGRG1/IGFBP3/SPINT2/APOD/SHH/MARVELD3/STC1/CYP1B1/PLXNB3/CXCL12/COL3A1/ERBB4/SLC9A3R1/C5AR2/JUP/BST2/KLF4/PTGER4/SP100/EPHA1/NRG3/WNT4/ARHGAP4/IDH2/IGFBP5/ZMYND8/TP53INP1/GPR173/CERS2/PADI2/CORO1B/RRAS/TPM1/SRGAP1/PTPRJ/RHOB/CCL2/SLURP1/KRT16/WAS/ADAM15/LDLRAD4/C16orf45/IFITM1/CCL28/IL24/NOV/JAG1/PTPRK/CITED2/CHRD/NR2F2/ABR/NDRG4/CNN2/NOTCH1/CTNNA1/DLL4/DAB2IP/ARHGDIB/DAG1/AD…	72
BP	GO:0071346	cellular response to interferon-gamma	46|2653	133|14725	3.4326e-06	0.000667699	ENSG00000184557/ENSG00000163347/ENSG00000026508/ENSG00000117595/ENSG00000090339/ENSG00000111331/ENSG00000128604/ENSG00000138496/ENSG00000173193/ENSG00000135114/ENSG00000078401/ENSG00000067066/ENSG00000139832/ENSG00000185338/ENSG00000162645/ENSG00000111335/ENSG00000148180/ENSG00000089127/ENSG00000125148/ENSG00000198502/ENSG00000132256/ENSG00000058404/ENSG00000163932/ENSG00000123609/ENSG00000108691…	SOCS3/CLDN1/CD44/IRF6/ICAM1/OAS3/IRF5/PARP9/PARP14/OASL/EDN1/SP100/RAB20/SOCS1/GBP2/OAS2/GSN/OAS1/MT2A/HLA-DRB5/TRIM5/CAMK2B/PRKCD/NMI/CCL2/IRF2/NR1H2/RAB43/WAS/TRIM25/CCL22/ASS1/HCK/VIM/HLA-DRB1/TRIM8/CCL20/CCL26/MYO1C/CIITA/IRF1/ZYX/IRF3/FLNB/STXBP2/RPL13A	46
BP	GO:0001952	regulation of cell-matrix adhesion	36|2653	95|14725	3.65586e-06	0.000672944	ENSG00000137801/ENSG00000189058/ENSG00000141376/ENSG00000173156/ENSG00000173801/ENSG00000131669/ENSG00000248905/ENSG00000124145/ENSG00000099250/ENSG00000146904/ENSG00000140945/ENSG00000162552/ENSG00000113916/ENSG00000145675/ENSG00000196581/ENSG00000090020/ENSG00000213853/ENSG00000177076/ENSG00000115109/ENSG00000126353/ENSG00000158856/ENSG00000149177/ENSG00000143537/ENSG00000185043/ENSG00000151882…	THBS1/APOD/BCAS3/RHOD/JUP/NINJ1/FMN1/SDC4/NRP1/EPHA1/CDH13/WNT4/BCL6/PIK3R1/AJAP1/SLC9A1/EMP2/ACER2/EPB41L5/CCR7/DMTN/PTPRJ/ADAM15/CIB1/CCL28/JAG1/SMAD3/CAMSAP3/VEGFA/S100A10/COL16A1/DAG1/ONECUT1/SERPINE1/DDR1/VEGFC	36
BP	GO:0050878	regulation of body fluid levels	116|2653	435|14725	3.69815e-06	0.000672944	ENSG00000137801/ENSG00000111319/ENSG00000159176/ENSG00000107485/ENSG00000189143/ENSG00000137501/ENSG00000175793/ENSG00000100311/ENSG00000106541/ENSG00000118640/ENSG00000111679/ENSG00000158055/ENSG00000164690/ENSG00000163347/ENSG00000278828/ENSG00000165272/ENSG00000178726/ENSG00000168542/ENSG00000163220/ENSG00000010278/ENSG00000106211/ENSG00000054179/ENSG00000175591/ENSG00000144452/ENSG00000183044…	THBS1/SCNN1A/CSRP1/GATA3/CLDN4/SYTL2/SFN/PDGFB/AGR2/VAMP8/PTPN6/GRHL3/SHH/CLDN1/HIST1H3H/AQP3/THBD/COL3A1/S100A9/CD9/HSPB1/ENTPD2/P2RY2/ABCA12/ABAT/PRLR/ERBB4/KDF1/EDN1/XBP1/MYO5B/GNA14/HIST1H3G/ADCY5/KCNN4/CHRM1/CCND1/NPR3/MYL12A/CYP4F11/CYBA/ZNF385A/P2RX2/GRHL1/TP63/MAFK/OAS2/ZFPM1/PIK3R1/DOCK8/ANXA2/EMP2/PRKAR1B/PDGFA/STAT5A/TFPI/SCNN1B/SCNN1G/CAV1/ITPR3/PRKCD/DMTN/AKT1/FLNA/RHOB/VDR/IRF2/HIST…	116
BP	GO:0042060	wound healing	125|2653	480|14725	5.66243e-06	0.000998181	ENSG00000160182/ENSG00000137801/ENSG00000065361/ENSG00000138119/ENSG00000159176/ENSG00000107485/ENSG00000062038/ENSG00000100311/ENSG00000111679/ENSG00000189058/ENSG00000158055/ENSG00000006327/ENSG00000161905/ENSG00000164690/ENSG00000278828/ENSG00000026508/ENSG00000163235/ENSG00000178726/ENSG00000168542/ENSG00000163220/ENSG00000010278/ENSG00000106211/ENSG00000054179/ENSG00000183044/ENSG00000178568…	TFF1/THBS1/ERBB3/MYOF/CSRP1/GATA3/CDH3/PDGFB/PTPN6/APOD/GRHL3/TNFRSF12A/ALOX15/SHH/HIST1H3H/CD44/TGFA/THBD/COL3A1/S100A9/CD9/HSPB1/ENTPD2/ABAT/ERBB4/SYT7/NINJ1/ARHGEF19/EDN1/XBP1/GNA14/HIST1H3G/SDC4/TGFB2/SDC1/MYL12A/CYP4F11/WNT4/P2RX2/MAFK/ZFPM1/GSN/PIK3R1/AJAP1/B4GALT1/DOCK8/ANXA2/PRKAR1B/PDGFA/SLC11A1/LARGE1/S100A8/TFPI/CAV1/ITPR3/CORO1B/PRKCD/DMTN/AKT1/TPM1/RHOC/FLNA/RHOB/MSX2/IRF2/HIST1H3B/G…	125
BP	GO:0032970	regulation of actin filament-based process	89|2653	318|14725	6.48004e-06	0.00110769	ENSG00000184292/ENSG00000124126/ENSG00000006747/ENSG00000158055/ENSG00000161905/ENSG00000159167/ENSG00000141376/ENSG00000107562/ENSG00000090339/ENSG00000125968/ENSG00000205542/ENSG00000173156/ENSG00000173801/ENSG00000142632/ENSG00000078401/ENSG00000248905/ENSG00000130303/ENSG00000124145/ENSG00000171522/ENSG00000129682/ENSG00000130529/ENSG00000099250/ENSG00000172830/ENSG00000146904/ENSG00000197046…	TACSTD2/PREX1/SCIN/GRHL3/ALOX15/STC1/BCAS3/CXCL12/ICAM1/ID1/TMSB4X/RHOD/JUP/ARHGEF19/EDN1/FMN1/BST2/SDC4/PTGER4/FGF13/TRPM4/NRP1/SSH3/EPHA1/SIGLEC15/SEMA5A/SYNPO/WNT4/CORO1A/GSN/ARHGEF5/PIK3R1/SLC9A1/SYNPO2/PDGFA/VASP/ACTR3C/ARHGEF10L/CAV1/CCR7/CORO1B/PRKCD/DMTN/TPM1/ARPC1B/FLNA/PXN/F11R/MYH9/WAS/TGFB3/WDR1/HCK/SMAD3/ARPC4/PKP2/SPIRE2/CDK10/NOS1AP/CTTN/HIP1R/CNN2/TESK1/CTNNA3/CELSR1/DSP/ARHGAP35/…	89
BP	GO:0030336	negative regulation of cell migration	68|2653	227|14725	6.89072e-06	0.00114325	ENSG00000137801/ENSG00000184292/ENSG00000205336/ENSG00000146674/ENSG00000189058/ENSG00000164690/ENSG00000140832/ENSG00000159167/ENSG00000138061/ENSG00000198753/ENSG00000107562/ENSG00000168542/ENSG00000178568/ENSG00000109062/ENSG00000134830/ENSG00000173801/ENSG00000130303/ENSG00000136826/ENSG00000171522/ENSG00000067066/ENSG00000146904/ENSG00000185737/ENSG00000162552/ENSG00000089820/ENSG00000182054…	THBS1/TACSTD2/ADGRG1/IGFBP3/APOD/SHH/MARVELD3/STC1/CYP1B1/PLXNB3/CXCL12/COL3A1/ERBB4/SLC9A3R1/C5AR2/JUP/BST2/KLF4/PTGER4/SP100/EPHA1/NRG3/WNT4/ARHGAP4/IDH2/IGFBP5/ZMYND8/TP53INP1/GPR173/CERS2/PADI2/CORO1B/RRAS/TPM1/SRGAP1/PTPRJ/RHOB/CCL2/SLURP1/KRT16/ADAM15/LDLRAD4/C16orf45/IFITM1/CCL28/IL24/NOV/JAG1/PTPRK/CITED2/CHRD/NR2F2/ABR/NDRG4/CNN2/NOTCH1/DLL4/DAB2IP/ARHGDIB/DAG1/ADARB1/ADGRB1/SMAD7/STARD1…	68
BP	GO:0006935	chemotaxis	127|2653	492|14725	7.63037e-06	0.0012298	ENSG00000137801/ENSG00000144476/ENSG00000198910/ENSG00000151892/ENSG00000107485/ENSG00000102007/ENSG00000124126/ENSG00000189334/ENSG00000100311/ENSG00000131981/ENSG00000164690/ENSG00000141738/ENSG00000198753/ENSG00000107562/ENSG00000169242/ENSG00000163220/ENSG00000001617/ENSG00000106211/ENSG00000205542/ENSG00000132561/ENSG00000134830/ENSG00000171587/ENSG00000165731/ENSG00000130762/ENSG00000179388…	THBS1/ACKR3/L1CAM/GFRA1/GATA3/PLP2/PREX1/S100A14/PDGFB/LGALS3/SHH/GRB7/PLXNB3/CXCL12/EFNA1/S100A9/SEMA3F/HSPB1/TMSB4X/MATN2/C5AR2/DSCAM/RET/ARHGEF16/EGR3/EDN1/SEMA3C/ANOS1/TGFB2/TRPM4/NRP1/SEMA5A/GFRA3/HSD3B7/BMP7/CDH13/NRG3/SEMA4A/CORO1A/NRCAM/NTN4/SEMA4C/ARHGEF5/PIK3R1/EPHB3/SEMA3B/SCN1B/PDGFA/FAM129B/VASP/GAB2/CXCL16/ARX/S100A8/RAP1GAP/TUBB3/EDN2/PADI2/CXCR4/CCR7/CORO1B/PRKCD/EFNA4/FFAR2/ARTN/…	127
BP	GO:0043542	endothelial cell migration	58|2653	186|14725	8.43787e-06	0.00126025	ENSG00000137801/ENSG00000107485/ENSG00000100311/ENSG00000145632/ENSG00000159167/ENSG00000138061/ENSG00000141376/ENSG00000169242/ENSG00000106211/ENSG00000125968/ENSG00000138772/ENSG00000205542/ENSG00000173801/ENSG00000179388/ENSG00000078401/ENSG00000136826/ENSG00000099250/ENSG00000067066/ENSG00000112902/ENSG00000168874/ENSG00000140945/ENSG00000196189/ENSG00000163874/ENSG00000213853/ENSG00000126561…	THBS1/GATA3/PDGFB/PLK2/STC1/CYP1B1/BCAS3/EFNA1/HSPB1/ID1/ANXA3/TMSB4X/JUP/EGR3/EDN1/KLF4/NRP1/SP100/SEMA5A/ATOH8/CDH13/SEMA4A/ZC3H12A/EMP2/STAT5A/S100P/PLXND1/CORO1B/AKT1/RHOB/PXN/MYH9/CIB1/PLEKHG5/NOV/EPHA2/NR2F2/GIPC1/EPHB4/BCAR1/P2RX4/NOTCH1/PDCD6/LOXL2/VEGFA/PLCG1/FGF18/MIR200A/DLL4/DAB2IP/PRKD2/SCARB1/EFNB2/ADGRB1/STARD13/HDAC7/NR4A1/VEGFC	58
BP	GO:0072659	protein localization to plasma membrane	67|2653	224|14725	8.48413e-06	0.00126025	ENSG00000039068/ENSG00000184363/ENSG00000111057/ENSG00000137501/ENSG00000106541/ENSG00000118640/ENSG00000064270/ENSG00000124507/ENSG00000130545/ENSG00000144452/ENSG00000167964/ENSG00000109062/ENSG00000173801/ENSG00000130762/ENSG00000005884/ENSG00000099282/ENSG00000168899/ENSG00000129682/ENSG00000167535/ENSG00000164850/ENSG00000162552/ENSG00000151025/ENSG00000122679/ENSG00000172794/ENSG00000145675…	CDH1/PKP3/KRT18/SYTL2/AGR2/VAMP8/ATP2C2/PACSIN1/CRB3/ABCA12/RAB26/SLC9A3R1/JUP/ARHGEF16/ITGA3/TSPAN15/VAMP5/FGF13/CACNB3/GPER1/WNT4/GPR158/RAMP3/RAB37/PIK3R1/AR/GOLGA7B/LAMA5/ANXA2/EMP2/ATP1B1/LRRC15/PACS1/TSPAN14/TNFRSF1A/AKT1/FLNA/PLEKHF1/TMEM150A/F11R/CIB1/EFR3B/EPHA2/PID1/PKP2/BCL2L1/RAB40C/PRKCH/TMEM88/PACS2/VIL1/AP2M1/ARFRP1/S100A10/MAP7/LYPD1/MYO5A/TTC7A/SQSTM1/KCNJ11/MYADM/AKT2/CLTC/ZDHHC…	67
BP	GO:0042330	taxis	127|2653	493|14725	8.48956e-06	0.00126025	ENSG00000137801/ENSG00000144476/ENSG00000198910/ENSG00000151892/ENSG00000107485/ENSG00000102007/ENSG00000124126/ENSG00000189334/ENSG00000100311/ENSG00000131981/ENSG00000164690/ENSG00000141738/ENSG00000198753/ENSG00000107562/ENSG00000169242/ENSG00000163220/ENSG00000001617/ENSG00000106211/ENSG00000205542/ENSG00000132561/ENSG00000134830/ENSG00000171587/ENSG00000165731/ENSG00000130762/ENSG00000179388…	THBS1/ACKR3/L1CAM/GFRA1/GATA3/PLP2/PREX1/S100A14/PDGFB/LGALS3/SHH/GRB7/PLXNB3/CXCL12/EFNA1/S100A9/SEMA3F/HSPB1/TMSB4X/MATN2/C5AR2/DSCAM/RET/ARHGEF16/EGR3/EDN1/SEMA3C/ANOS1/TGFB2/TRPM4/NRP1/SEMA5A/GFRA3/HSD3B7/BMP7/CDH13/NRG3/SEMA4A/CORO1A/NRCAM/NTN4/SEMA4C/ARHGEF5/PIK3R1/EPHB3/SEMA3B/SCN1B/PDGFA/FAM129B/VASP/GAB2/CXCL16/ARX/S100A8/RAP1GAP/TUBB3/EDN2/PADI2/CXCR4/CCR7/CORO1B/PRKCD/EFNA4/FFAR2/ARTN/…	127
BP	GO:0001954	positive regulation of cell-matrix adhesion	20|2653	42|14725	1.05203e-05	0.00152167	ENSG00000173801/ENSG00000131669/ENSG00000248905/ENSG00000124145/ENSG00000099250/ENSG00000146904/ENSG00000140945/ENSG00000162552/ENSG00000213853/ENSG00000115109/ENSG00000126353/ENSG00000149177/ENSG00000185043/ENSG00000151882/ENSG00000166949/ENSG00000112715/ENSG00000197747/ENSG00000084636/ENSG00000173402/ENSG00000150630	JUP/NINJ1/FMN1/SDC4/NRP1/EPHA1/CDH13/WNT4/EMP2/EPB41L5/CCR7/PTPRJ/CIB1/CCL28/SMAD3/VEGFA/S100A10/COL16A1/DAG1/VEGFC	20
BP	GO:0060333	interferon-gamma-mediated signaling pathway	29|2653	73|14725	1.08981e-05	0.00153691	ENSG00000184557/ENSG00000026508/ENSG00000117595/ENSG00000090339/ENSG00000111331/ENSG00000128604/ENSG00000138496/ENSG00000173193/ENSG00000135114/ENSG00000067066/ENSG00000185338/ENSG00000162645/ENSG00000111335/ENSG00000089127/ENSG00000125148/ENSG00000198502/ENSG00000132256/ENSG00000058404/ENSG00000163932/ENSG00000123609/ENSG00000168310/ENSG00000131408/ENSG00000121060/ENSG00000101336/ENSG00000196126…	SOCS3/CD44/IRF6/ICAM1/OAS3/IRF5/PARP9/PARP14/OASL/SP100/SOCS1/GBP2/OAS2/OAS1/MT2A/HLA-DRB5/TRIM5/CAMK2B/PRKCD/NMI/IRF2/NR1H2/TRIM25/HCK/HLA-DRB1/TRIM8/CIITA/IRF1/IRF3	29
BP	GO:0010817	regulation of hormone levels	112|2653	430|14725	1.7003e-05	0.00230768	ENSG00000091831/ENSG00000129514/ENSG00000107485/ENSG00000128564/ENSG00000143320/ENSG00000163083/ENSG00000118640/ENSG00000119714/ENSG00000164690/ENSG00000138061/ENSG00000183044/ENSG00000100867/ENSG00000011347/ENSG00000151632/ENSG00000196139/ENSG00000078401/ENSG00000169047/ENSG00000087085/ENSG00000270885/ENSG00000170745/ENSG00000145103/ENSG00000173175/ENSG00000196557/ENSG00000130529/ENSG00000113739…	ESR1/FOXA1/GATA3/VGF/CRABP2/INHBB/VAMP8/GPR68/SHH/CYP1B1/ABAT/DHRS2/SYT7/AKR1C2/AKR1C3/EDN1/IRS1/ACHE/RASL10B/KCNS3/ILDR1/ADCY5/CACNA1H/TRPM4/STC2/CRABP1/PAX8/GPER1/WNT4/SREBF1/DIO2/HFE/SOX11/AKR1C1/CPT1A/CYP1A1/DIO3/ICA1/FAM129B/EGR1/SLC2A1/SLCO4A1/INHA/UGT1A1/TPO/ALDH1A3/ITPR3/FAM3B/PPP3CA/TRERF1/FFAR2/HPN/KISS1/C9orf3/SNX19/VDR/TFR2/SDR16C5/GNAS/PTPRN2/MYB/HCAR2/ADRA2B/COMT/NOV/KLK6/HLA-DRB1/H…	112
BP	GO:0007160	cell-matrix adhesion	58|2653	190|14725	1.71818e-05	0.00230768	ENSG00000137801/ENSG00000198910/ENSG00000132470/ENSG00000189058/ENSG00000124466/ENSG00000026508/ENSG00000141376/ENSG00000168542/ENSG00000173156/ENSG00000115221/ENSG00000173801/ENSG00000187244/ENSG00000131669/ENSG00000005884/ENSG00000248905/ENSG00000124145/ENSG00000168743/ENSG00000099250/ENSG00000146904/ENSG00000140945/ENSG00000162552/ENSG00000113916/ENSG00000145675/ENSG00000196581/ENSG00000090020…	THBS1/L1CAM/ITGB4/APOD/LYPD3/CD44/BCAS3/COL3A1/RHOD/ITGB6/JUP/BCAM/NINJ1/ITGA3/FMN1/SDC4/NPNT/NRP1/EPHA1/CDH13/WNT4/BCL6/PIK3R1/AJAP1/SLC9A1/LAMA5/EMP2/ACER2/EPB41L5/CCR7/DMTN/PTPRJ/PXN/CD63/ADAM15/FN1/CIB1/TRIP6/CCL28/JAG1/ITGB5/SMAD3/PTPRK/CTTN/VWA2/CAMSAP3/ACTN1/ITGB7/VEGFA/S100A10/ZYX/COL16A1/DAG1/ONECUT1/SERPINE1/THBS3/DDR1/VEGFC	58
BP	GO:0060337	type I interferon signaling pathway	28|2653	71|14725	1.8076e-05	0.00231742	ENSG00000172936/ENSG00000111679/ENSG00000142089/ENSG00000187608/ENSG00000117595/ENSG00000157601/ENSG00000111331/ENSG00000128604/ENSG00000135114/ENSG00000130303/ENSG00000067066/ENSG00000162645/ENSG00000111335/ENSG00000089127/ENSG00000126709/ENSG00000120738/ENSG00000172183/ENSG00000119922/ENSG00000185201/ENSG00000168310/ENSG00000185885/ENSG00000119917/ENSG00000125347/ENSG00000134321/ENSG00000183486…	MYD88/PTPN6/IFITM3/ISG15/IRF6/MX1/OAS3/IRF5/OASL/BST2/SP100/GBP2/OAS2/OAS1/IFI6/EGR1/ISG20/IFIT2/IFITM2/IRF2/IFITM1/IFIT3/IRF1/RSAD2/MX2/IRF3/PTPN1/IFI35	28
BP	GO:0071357	cellular response to type I interferon	28|2653	71|14725	1.8076e-05	0.00231742	ENSG00000172936/ENSG00000111679/ENSG00000142089/ENSG00000187608/ENSG00000117595/ENSG00000157601/ENSG00000111331/ENSG00000128604/ENSG00000135114/ENSG00000130303/ENSG00000067066/ENSG00000162645/ENSG00000111335/ENSG00000089127/ENSG00000126709/ENSG00000120738/ENSG00000172183/ENSG00000119922/ENSG00000185201/ENSG00000168310/ENSG00000185885/ENSG00000119917/ENSG00000125347/ENSG00000134321/ENSG00000183486…	MYD88/PTPN6/IFITM3/ISG15/IRF6/MX1/OAS3/IRF5/OASL/BST2/SP100/GBP2/OAS2/OAS1/IFI6/EGR1/ISG20/IFIT2/IFITM2/IRF2/IFITM1/IFIT3/IRF1/RSAD2/MX2/IRF3/PTPN1/IFI35	28
BP	GO:0009617	response to bacterium	104|2653	395|14725	2.07784e-05	0.00260469	ENSG00000128564/ENSG00000189334/ENSG00000184678/ENSG00000069399/ENSG00000172936/ENSG00000273802/ENSG00000163347/ENSG00000187608/ENSG00000171223/ENSG00000090339/ENSG00000178726/ENSG00000163220/ENSG00000111321/ENSG00000128604/ENSG00000138772/ENSG00000128016/ENSG00000180596/ENSG00000078401/ENSG00000100219/ENSG00000104689/ENSG00000171522/ENSG00000170345/ENSG00000100906/ENSG00000124635/ENSG00000131759…	VGF/S100A14/HIST2H2BE/BCL3/MYD88/HIST1H2BG/CLDN1/ISG15/JUNB/ICAM1/THBD/S100A9/LTBR/IRF5/ANXA3/ZFP36/HIST1H2BC/EDN1/XBP1/TNFRSF10A/PTGER4/FOS/NFKBIA/HIST1H2BJ/RARA/CYBA/HIST1H2BK/PPM1D/LOXL1/PTGES/TNFRSF25/PGLYRP2/TNFRSF18/ZC3H12A/CYP1A1/CMPK2/RPS6KB1/TH/HIST1H2BF/SLC11A1/TRIM5/S100A8/TFPI/GJB2/UGT1A1/JUND/CAV1/CCR7/PRKCD/TNFRSF1A/AKT1/CEBPB/LITAF/SIGIRR/CXCL8/SERPINB9/MAPKAPK2/CCL2/CARD9/NFKB2/AB…	104
BP	GO:0051272	positive regulation of cellular component movement	111|2653	428|14725	2.2647e-05	0.0027537	ENSG00000137801/ENSG00000144476/ENSG00000181885/ENSG00000107485/ENSG00000132698/ENSG00000124126/ENSG00000189334/ENSG00000100311/ENSG00000131981/ENSG00000145632/ENSG00000141738/ENSG00000141376/ENSG00000184731/ENSG00000107562/ENSG00000090339/ENSG00000106211/ENSG00000138772/ENSG00000205542/ENSG00000173156/ENSG00000115594/ENSG00000180921/ENSG00000171587/ENSG00000165731/ENSG00000171631/ENSG00000005884…	THBS1/ACKR3/CLDN7/GATA3/RAB25/PREX1/S100A14/PDGFB/LGALS3/PLK2/GRB7/BCAS3/FAM110C/CXCL12/ICAM1/HSPB1/ANXA3/TMSB4X/RHOD/IL1R1/FAM83H/DSCAM/RET/P2RY6/ITGA3/EDN1/DRD1/XBP1/SEMA3C/TGFB2/TRPM4/NRP1/EPHA1/SEMA5A/BMP7/ATOH8/CDH13/GPER1/ZP3/BCL6/CORO1A/TNFRSF18/PIK3R1/ZC3H12A/RPS6KB1/DOCK8/COL18A1/PDGFA/STAT5A/CXCL16/CEACAM6/PODXL/EPB41L5/EDN2/LRRC15/CCR7/DMTN/TCAF2/AKT1/MMP9/FLNA/RHOB/CXCL8/CEMIP/FN1/CIB…	111
BP	GO:0003382	epithelial cell morphogenesis	15|2653	28|14725	2.29434e-05	0.0027537	ENSG00000165215/ENSG00000149418/ENSG00000132698/ENSG00000167642/ENSG00000159167/ENSG00000125968/ENSG00000124429/ENSG00000083307/ENSG00000169083/ENSG00000182871/ENSG00000115109/ENSG00000106397/ENSG00000127152/ENSG00000105738/ENSG00000136068	CLDN3/ST14/RAB25/SPINT2/STC1/ID1/POF1B/GRHL2/AR/COL18A1/EPB41L5/PLOD3/BCL11B/SIPA1L3/FLNB	15
BP	GO:0034332	adherens junction organization	39|2653	114|14725	2.46437e-05	0.00289614	ENSG00000039068/ENSG00000137801/ENSG00000062038/ENSG00000143217/ENSG00000189058/ENSG00000141376/ENSG00000173156/ENSG00000173801/ENSG00000248905/ENSG00000124145/ENSG00000099250/ENSG00000166689/ENSG00000140945/ENSG00000162552/ENSG00000163349/ENSG00000139880/ENSG00000090020/ENSG00000130702/ENSG00000115109/ENSG00000158856/ENSG00000130202/ENSG00000149177/ENSG00000110400/ENSG00000087077/ENSG00000166949…	CDH1/THBS1/CDH3/NECTIN4/APOD/BCAS3/RHOD/JUP/FMN1/SDC4/NRP1/PLEKHA7/CDH13/WNT4/HIPK1/CDH24/SLC9A1/LAMA5/EPB41L5/DMTN/NECTIN2/PTPRJ/NECTIN1/TRIP6/SMAD3/PTPRK/CDH18/CTTN/DSP/CAMSAP3/ACTN1/CTNNA1/VEGFA/CDH11/S100A10/INAVA/COL16A1/SMAD7/CDH5	39
BP	GO:0051701	interaction with host	57|2653	188|14725	2.51812e-05	0.00289892	ENSG00000039068/ENSG00000184012/ENSG00000118640/ENSG00000143217/ENSG00000213937/ENSG00000142089/ENSG00000163347/ENSG00000100097/ENSG00000090339/ENSG00000115221/ENSG00000186350/ENSG00000148180/ENSG00000163874/ENSG00000132256/ENSG00000121966/ENSG00000105974/ENSG00000130202/ENSG00000185201/ENSG00000169429/ENSG00000170542/ENSG00000130164/ENSG00000198373/ENSG00000158769/ENSG00000121060/ENSG00000110400…	CDH1/TMPRSS2/VAMP8/NECTIN4/CLDN9/IFITM3/CLDN1/LGALS1/ICAM1/ITGB6/RXRA/GSN/ZC3H12A/TRIM5/CXCR4/CAV1/NECTIN2/IFITM2/CXCL8/SERPINB9/LDLR/WWP2/F11R/TRIM25/NECTIN1/IFITM1/ITGB5/EPHA2/SMAD3/WWP1/HLA-DRB1/SLC25A6/BCL2L1/VAPB/TRIM8/PC/ANPEP/ITGB7/VPS18/GRK2/UBC/THOC7/GRB2/LAMP1/DAG1/CLDN6/SLC1A5/ARAF/SCARB1/EFNB2/CAV2/CHMP4C/HS3ST5/P4HB/SLC22A5/CTSB/NTRK3	57
BP	GO:0048732	gland development	107|2653	412|14725	2.96877e-05	0.00334937	ENSG00000039068/ENSG00000091831/ENSG00000103067/ENSG00000129514/ENSG00000163435/ENSG00000107485/ENSG00000188064/ENSG00000064270/ENSG00000164690/ENSG00000163347/ENSG00000103089/ENSG00000121068/ENSG00000117595/ENSG00000163235/ENSG00000196562/ENSG00000113494/ENSG00000134595/ENSG00000178568/ENSG00000109062/ENSG00000143061/ENSG00000170430/ENSG00000082175/ENSG00000100219/ENSG00000075223/ENSG00000092969…	CDH1/ESR1/ESRP2/FOXA1/ELF3/GATA3/WNT7B/ATP2C2/SHH/CLDN1/FA2H/TBX2/IRF6/TGFA/SULF2/PRLR/SOX3/ERBB4/SLC9A3R1/IGSF3/MGMT/PGR/XBP1/SEMA3C/TGFB2/NRP1/NFKBIA/RARA/PAX8/CCND1/BMP7/NRG3/ASCL1/ELF5/WNT4/HFE/RXRA/PPDPF/TP63/IGFBP5/OAS2/NTN4/AR/EPHB3/CYP1A1/LAMA5/RARG/B4GALT1/PDGFA/STAT5A/RAP1GAP/UGT1A1/PLXND1/ALDH1A3/FSTL3/CAV1/AKT1/CEBPB/HPN/COBL/ETV5/AREG/CAPN1/CRIP1/VDR/STRA6/MSX2/TGFB3/CDKN1B/ASS1/EPHA…	107
BP	GO:0030335	positive regulation of cell migration	105|2653	403|14725	3.04443e-05	0.00336738	ENSG00000137801/ENSG00000144476/ENSG00000107485/ENSG00000132698/ENSG00000124126/ENSG00000189334/ENSG00000100311/ENSG00000131981/ENSG00000145632/ENSG00000141738/ENSG00000141376/ENSG00000184731/ENSG00000107562/ENSG00000090339/ENSG00000106211/ENSG00000138772/ENSG00000205542/ENSG00000173156/ENSG00000115594/ENSG00000180921/ENSG00000165731/ENSG00000171631/ENSG00000005884/ENSG00000078401/ENSG00000184845…	THBS1/ACKR3/GATA3/RAB25/PREX1/S100A14/PDGFB/LGALS3/PLK2/GRB7/BCAS3/FAM110C/CXCL12/ICAM1/HSPB1/ANXA3/TMSB4X/RHOD/IL1R1/FAM83H/RET/P2RY6/ITGA3/EDN1/DRD1/XBP1/SEMA3C/TGFB2/NRP1/EPHA1/SEMA5A/BMP7/ATOH8/CDH13/GPER1/ZP3/CORO1A/TNFRSF18/PIK3R1/ZC3H12A/RPS6KB1/DOCK8/COL18A1/PDGFA/STAT5A/CXCL16/CEACAM6/PODXL/EPB41L5/EDN2/LRRC15/CCR7/DMTN/TCAF2/AKT1/MMP9/FLNA/RHOB/CXCL8/CEMIP/FN1/CIB1/TRIP6/F7/SMAD3/IGF1R/…	105
BP	GO:0045604	regulation of epidermal cell differentiation	21|2653	48|14725	3.2066e-05	0.00347855	ENSG00000175793/ENSG00000088002/ENSG00000124151/ENSG00000165272/ENSG00000175707/ENSG00000159216/ENSG00000134317/ENSG00000073282/ENSG00000083307/ENSG00000185650/ENSG00000162891/ENSG00000111424/ENSG00000120149/ENSG00000134323/ENSG00000125850/ENSG00000185022/ENSG00000137497/ENSG00000027075/ENSG00000148400/ENSG00000114315/ENSG00000221926	SFN/SULT2B1/NCOA3/AQP3/KDF1/RUNX1/GRHL1/TP63/GRHL2/ZFP36L1/IL20/VDR/MSX2/MYCN/OVOL2/MAFF/NUMA1/PRKCH/NOTCH1/HES1/TRIM16	21
BP	GO:0045684	positive regulation of epidermis development	17|2653	35|14725	3.50011e-05	0.00372531	ENSG00000175793/ENSG00000088002/ENSG00000124151/ENSG00000175707/ENSG00000092969/ENSG00000128422/ENSG00000162891/ENSG00000111424/ENSG00000120149/ENSG00000125850/ENSG00000102871/ENSG00000137497/ENSG00000027075/ENSG00000148400/ENSG00000109101/ENSG00000163472/ENSG00000221926	SFN/SULT2B1/NCOA3/KDF1/TGFB2/KRT17/IL20/VDR/MSX2/OVOL2/TRADD/NUMA1/PRKCH/NOTCH1/FOXN1/TMEM79/TRIM16	17
BP	GO:0007015	actin filament organization	90|2653	336|14725	3.67888e-05	0.00384307	ENSG00000184292/ENSG00000124126/ENSG00000111859/ENSG00000006747/ENSG00000161905/ENSG00000124507/ENSG00000107562/ENSG00000090339/ENSG00000125968/ENSG00000205542/ENSG00000173156/ENSG00000124429/ENSG00000248905/ENSG00000124145/ENSG00000171522/ENSG00000099250/ENSG00000136167/ENSG00000172830/ENSG00000146904/ENSG00000112902/ENSG00000171992/ENSG00000162552/ENSG00000102879/ENSG00000078114/ENSG00000164877…	TACSTD2/PREX1/NEDD9/SCIN/ALOX15/PACSIN1/CXCL12/ICAM1/ID1/TMSB4X/RHOD/POF1B/FMN1/SDC4/PTGER4/NRP1/LCP1/SSH3/EPHA1/SEMA5A/SYNPO/WNT4/CORO1A/NEBL/MICALL2/GSN/ARHGEF5/PIK3R1/RND1/SLC9A1/SYNPO2/EMP2/ESPN/VASP/ACTR3C/ARHGEF10L/CCR7/CORO1B/PRKCD/DMTN/COBL/TPM1/ARPC1B/FLNA/PXN/FSCN2/WAS/TGFB3/WDR1/SHROOM4/HCK/ITGB5/SMAD3/ARPC4/SPIRE2/BCAR1/CTTN/HIP1R/TESK1/ARHGAP35/CCL26/MYO1C/RHOF/ACTN1/CFL1/CTNNA1/VIL1…	90
BP	GO:2000147	positive regulation of cell motility	107|2653	416|14725	4.56583e-05	0.00463831	ENSG00000137801/ENSG00000144476/ENSG00000181885/ENSG00000107485/ENSG00000132698/ENSG00000124126/ENSG00000189334/ENSG00000100311/ENSG00000131981/ENSG00000145632/ENSG00000141738/ENSG00000141376/ENSG00000184731/ENSG00000107562/ENSG00000090339/ENSG00000106211/ENSG00000138772/ENSG00000205542/ENSG00000173156/ENSG00000115594/ENSG00000180921/ENSG00000165731/ENSG00000171631/ENSG00000005884/ENSG00000078401…	THBS1/ACKR3/CLDN7/GATA3/RAB25/PREX1/S100A14/PDGFB/LGALS3/PLK2/GRB7/BCAS3/FAM110C/CXCL12/ICAM1/HSPB1/ANXA3/TMSB4X/RHOD/IL1R1/FAM83H/RET/P2RY6/ITGA3/EDN1/DRD1/XBP1/SEMA3C/TGFB2/NRP1/EPHA1/SEMA5A/BMP7/ATOH8/CDH13/GPER1/ZP3/CORO1A/TNFRSF18/PIK3R1/ZC3H12A/RPS6KB1/DOCK8/COL18A1/PDGFA/STAT5A/CXCL16/CEACAM6/PODXL/EPB41L5/EDN2/LRRC15/CCR7/DMTN/TCAF2/AKT1/MMP9/FLNA/RHOB/CXCL8/CEMIP/FN1/CIB1/TRIP6/F7/SMAD3/…	107
BP	GO:0030879	mammary gland development	43|2653	133|14725	4.60459e-05	0.00463831	ENSG00000091831/ENSG00000163435/ENSG00000107485/ENSG00000188064/ENSG00000064270/ENSG00000121068/ENSG00000117595/ENSG00000163235/ENSG00000113494/ENSG00000178568/ENSG00000170430/ENSG00000082175/ENSG00000100219/ENSG00000110092/ENSG00000185737/ENSG00000135374/ENSG00000162552/ENSG00000115461/ENSG00000111335/ENSG00000169083/ENSG00000086062/ENSG00000126561/ENSG00000105974/ENSG00000142208/ENSG00000172216…	ESR1/ELF3/GATA3/WNT7B/ATP2C2/TBX2/IRF6/TGFA/PRLR/ERBB4/MGMT/PGR/XBP1/CCND1/NRG3/ELF5/WNT4/IGFBP5/OAS2/AR/B4GALT1/STAT5A/CAV1/AKT1/CEBPB/ETV5/AREG/CAPN1/VDR/MSX2/TGFB3/EPHA2/AGAP2/LRP5/FASN/ARHGAP35/NCOR2/VEGFA/EGF/KDM5B/AKT2/DDR1/MT-CO2	43
BP	GO:0019058	viral life cycle	78|2653	284|14725	4.78745e-05	0.0047379	ENSG00000184012/ENSG00000118640/ENSG00000143217/ENSG00000213937/ENSG00000142089/ENSG00000163347/ENSG00000100097/ENSG00000187608/ENSG00000090339/ENSG00000157601/ENSG00000111331/ENSG00000166801/ENSG00000135114/ENSG00000115221/ENSG00000130303/ENSG00000178685/ENSG00000148180/ENSG00000163874/ENSG00000089127/ENSG00000132256/ENSG00000172183/ENSG00000172061/ENSG00000121966/ENSG00000105974/ENSG00000130202…	TMPRSS2/VAMP8/NECTIN4/CLDN9/IFITM3/CLDN1/LGALS1/ISG15/ICAM1/MX1/OAS3/FAM111A/OASL/ITGB6/BST2/PARP10/GSN/ZC3H12A/OAS1/TRIM5/ISG20/LRRC15/CXCR4/CAV1/NECTIN2/IFITM2/LAMTOR5/CXCL8/CCL2/LDLR/WWP2/F11R/C19orf66/RAB43/TRIM25/NR5A2/NECTIN1/IFITM1/ITGB5/EPHA2/WWP1/HLA-DRB1/RAB1B/CHMP1A/CHMP1B/LRSAM1/PIK3C2G/VAPB/TRIM8/PABPC1/NOTCH1/PC/ANPEP/FURIN/RSAD2/ITGB7/VPS18/VPS37C/GRK2/UBC/LAMP1/TARBP2/PCBP1/NEDD4L…	78
BP	GO:0010876	lipid localization	85|2653	317|14725	5.74303e-05	0.00558559	ENSG00000137801/ENSG00000081923/ENSG00000108846/ENSG00000185101/ENSG00000189058/ENSG00000164690/ENSG00000160179/ENSG00000214530/ENSG00000263528/ENSG00000144452/ENSG00000176463/ENSG00000011347/ENSG00000182107/ENSG00000168398/ENSG00000078401/ENSG00000118777/ENSG00000101188/ENSG00000100906/ENSG00000168907/ENSG00000125730/ENSG00000104783/ENSG00000214456/ENSG00000153246/ENSG00000167972/ENSG00000186350…	THBS1/ATP8B1/ABCC3/ANO9/APOD/SHH/ABCG1/STARD10/IKBKE/ABCA12/SLCO3A1/SYT7/TMEM30B/BDKRB2/EDN1/ABCG2/NTSR1/NFKBIA/PLA2G4F/C3/KCNN4/PLIN5/PLA2R1/ABCA3/RXRA/OSBPL7/AKR1C1/CPT1A/ZC3H12A/ATP9A/ANXA2/ABCA2/PLA2G3/LRP10/ESYT3/CLU/HILPDA/CAV1/PITPNC1/PRKCD/AKT1/SOAT2/SLC10A3/FFAR2/OSBPL10/STRA6/LDLR/NR1H2/MYB/ABCA1/APOBR/APOL6/SERPINA5/ABCA4/GLTPD2/DISP3/FITM2/P2RX4/ABCD1/EHD1/CRY2/LAMTOR1/TEX2/NRIP1/PLIN…	85
BP	GO:0030856	regulation of epithelial cell differentiation	39|2653	118|14725	5.92512e-05	0.00566502	ENSG00000107485/ENSG00000175793/ENSG00000088002/ENSG00000124151/ENSG00000165272/ENSG00000125968/ENSG00000175707/ENSG00000159216/ENSG00000125618/ENSG00000213694/ENSG00000110092/ENSG00000168874/ENSG00000139352/ENSG00000134317/ENSG00000073282/ENSG00000083307/ENSG00000196581/ENSG00000105974/ENSG00000185650/ENSG00000067182/ENSG00000172216/ENSG00000162891/ENSG00000111424/ENSG00000120149/ENSG00000134323…	GATA3/SFN/SULT2B1/NCOA3/AQP3/ID1/KDF1/RUNX1/PAX8/S1PR3/CCND1/ATOH8/ASCL1/GRHL1/TP63/GRHL2/AJAP1/CAV1/ZFP36L1/TNFRSF1A/CEBPB/IL20/VDR/MSX2/MYCN/CDKN1B/JAG1/OVOL2/MAFF/NUMA1/PRKCH/MESP1/NOTCH1/FOXN1/LIF/HES1/SERPINE1/TRIM16/CDH5	39
BP	GO:0060326	cell chemotaxis	58|2653	198|14725	6.39988e-05	0.00593156	ENSG00000137801/ENSG00000124126/ENSG00000189334/ENSG00000100311/ENSG00000131981/ENSG00000198753/ENSG00000107562/ENSG00000163220/ENSG00000106211/ENSG00000205542/ENSG00000134830/ENSG00000130762/ENSG00000179388/ENSG00000078401/ENSG00000092969/ENSG00000130529/ENSG00000099250/ENSG00000112902/ENSG00000099377/ENSG00000102879/ENSG00000050327/ENSG00000161921/ENSG00000143546/ENSG00000127129/ENSG00000117115…	THBS1/PREX1/S100A14/PDGFB/LGALS3/PLXNB3/CXCL12/S100A9/HSPB1/TMSB4X/C5AR2/ARHGEF16/EGR3/EDN1/TGFB2/TRPM4/NRP1/SEMA5A/HSD3B7/CORO1A/ARHGEF5/CXCL16/S100A8/EDN2/PADI2/CXCR4/CCR7/CORO1B/PRKCD/FFAR2/CXCL8/CCL2/IL17RC/CCL22/PLEKHG5/CCL28/NOV/EPHA2/F7/RARRES2/BCAR1/CCL20/P2RX4/NOTCH1/CCL26/PARVA/VEGFA/DAPK2/TRPV4/FGF18/ADAM8/PRKD2/VAV3/MAPK3/SERPINE1/VAV1/NR4A1/VEGFC	58
BP	GO:0060443	mammary gland morphogenesis	19|2653	43|14725	6.4142e-05	0.00593156	ENSG00000091831/ENSG00000163435/ENSG00000121068/ENSG00000082175/ENSG00000185737/ENSG00000162552/ENSG00000115461/ENSG00000169083/ENSG00000086062/ENSG00000105974/ENSG00000244405/ENSG00000109321/ENSG00000014216/ENSG00000111424/ENSG00000120149/ENSG00000142627/ENSG00000162337/ENSG00000117139/ENSG00000204580	ESR1/ELF3/TBX2/PGR/NRG3/WNT4/IGFBP5/AR/B4GALT1/CAV1/ETV5/AREG/CAPN1/VDR/MSX2/EPHA2/LRP5/KDM5B/DDR1	19
BP	GO:0032956	regulation of actin cytoskeleton organization	76|2653	278|14725	7.01964e-05	0.00638674	ENSG00000184292/ENSG00000124126/ENSG00000006747/ENSG00000158055/ENSG00000161905/ENSG00000141376/ENSG00000107562/ENSG00000090339/ENSG00000125968/ENSG00000205542/ENSG00000173156/ENSG00000142632/ENSG00000078401/ENSG00000248905/ENSG00000130303/ENSG00000124145/ENSG00000171522/ENSG00000099250/ENSG00000172830/ENSG00000146904/ENSG00000197046/ENSG00000112902/ENSG00000171992/ENSG00000162552/ENSG00000102879…	TACSTD2/PREX1/SCIN/GRHL3/ALOX15/BCAS3/CXCL12/ICAM1/ID1/TMSB4X/RHOD/ARHGEF19/EDN1/FMN1/BST2/SDC4/PTGER4/NRP1/SSH3/EPHA1/SIGLEC15/SEMA5A/SYNPO/WNT4/CORO1A/GSN/ARHGEF5/PIK3R1/SLC9A1/SYNPO2/PDGFA/VASP/ACTR3C/ARHGEF10L/CCR7/CORO1B/PRKCD/DMTN/TPM1/ARPC1B/PXN/F11R/WAS/TGFB3/WDR1/HCK/SMAD3/ARPC4/SPIRE2/CDK10/CTTN/HIP1R/TESK1/CELSR1/ARHGAP35/CCL26/MYO1C/CFL1/VIL1/PHPT1/BRK1/S100A10/ARPC5L/TMOD3/LIMK1/GRB2…	76
BP	GO:0030048	actin filament-based movement	38|2653	115|14725	7.36496e-05	0.00644863	ENSG00000115648/ENSG00000159167/ENSG00000173801/ENSG00000162989/ENSG00000055118/ENSG00000130529/ENSG00000090020/ENSG00000213853/ENSG00000105711/ENSG00000159173/ENSG00000115109/ENSG00000105974/ENSG00000080709/ENSG00000140416/ENSG00000196924/ENSG00000100345/ENSG00000015285/ENSG00000105357/ENSG00000196586/ENSG00000026025/ENSG00000057294/ENSG00000092841/ENSG00000198929/ENSG00000130598/ENSG00000171385…	MLPH/STC1/JUP/KCNJ3/KCNH2/TRPM4/SLC9A1/EMP2/SCN1B/TNNI1/EPB41L5/CAV1/KCNN2/TPM1/FLNA/MYH9/WAS/MYH14/MYO6/VIM/PKP2/MYL6/NOS1AP/TNNI2/KCND3/CTNNA3/DSP/MYO1C/PARVA/VIL1/MYO1B/MYO5A/MYRIP/CACNA1D/NEDD4L/FGF12/TPM4/WASL	38
BP	GO:0040017	positive regulation of locomotion	112|2653	444|14725	7.36531e-05	0.00644863	ENSG00000137801/ENSG00000144476/ENSG00000181885/ENSG00000107485/ENSG00000132698/ENSG00000124126/ENSG00000189334/ENSG00000100311/ENSG00000131981/ENSG00000145632/ENSG00000141738/ENSG00000141376/ENSG00000184731/ENSG00000107562/ENSG00000090339/ENSG00000106211/ENSG00000138772/ENSG00000205542/ENSG00000173156/ENSG00000115594/ENSG00000180921/ENSG00000171587/ENSG00000165731/ENSG00000171631/ENSG00000005884…	THBS1/ACKR3/CLDN7/GATA3/RAB25/PREX1/S100A14/PDGFB/LGALS3/PLK2/GRB7/BCAS3/FAM110C/CXCL12/ICAM1/HSPB1/ANXA3/TMSB4X/RHOD/IL1R1/FAM83H/DSCAM/RET/P2RY6/ITGA3/EDN1/DRD1/XBP1/SEMA3C/TGFB2/NRP1/EPHA1/SEMA5A/BMP7/ATOH8/CDH13/GPER1/ZP3/CORO1A/TNFRSF18/PIK3R1/ZC3H12A/RPS6KB1/DOCK8/COL18A1/PDGFA/STAT5A/CXCL16/CEACAM6/PODXL/EPB41L5/EDN2/LRRC15/CCR7/DMTN/TCAF2/AKT1/ARTN/MMP9/FLNA/RHOB/CXCL8/CEMIP/FN1/CIB1/TRIP…	112
BP	GO:0007162	negative regulation of cell adhesion	61|2653	212|14725	7.43062e-05	0.00644863	ENSG00000039068/ENSG00000137801/ENSG00000184292/ENSG00000065361/ENSG00000181885/ENSG00000119888/ENSG00000131981/ENSG00000167642/ENSG00000111679/ENSG00000189058/ENSG00000120708/ENSG00000164690/ENSG00000100097/ENSG00000138061/ENSG00000198753/ENSG00000141376/ENSG00000107562/ENSG00000010278/ENSG00000183044/ENSG00000171587/ENSG00000197971/ENSG00000164050/ENSG00000124145/ENSG00000136826/ENSG00000112902…	CDH1/THBS1/TACSTD2/ERBB3/CLDN7/EPCAM/LGALS3/SPINT2/PTPN6/APOD/TGFBI/SHH/LGALS1/CYP1B1/PLXNB3/BCAS3/CXCL12/CD9/ABAT/DSCAM/MBP/PLXNB1/SDC4/KLF4/SEMA5A/ZBTB7B/PLXNB2/CDH13/HFE/BCL6/VTCN1/PIK3R1/RND1/AJAP1/ACER2/MUC1/PODXL/EPB41L5/PLXND1/PRKCD/DMTN/CEBPB/ADAM15/ASS1/CCL28/JAG1/HLA-DRB1/GPNMB/IFNL1/TNFRSF21/NOTCH1/IRF1/TRPV4/ARHGDIB/MYADM/IL1RN/CCM2L/B4GALNT2/SMAD7/SERPINE1/ERBB2	61
BP	GO:0010469	regulation of signaling receptor activity	101|2653	394|14725	8.48506e-05	0.00714592	ENSG00000160182/ENSG00000075461/ENSG00000188064/ENSG00000107984/ENSG00000128564/ENSG00000130513/ENSG00000013588/ENSG00000100311/ENSG00000163083/ENSG00000124151/ENSG00000164690/ENSG00000159167/ENSG00000167653/ENSG00000140961/ENSG00000107562/ENSG00000163235/ENSG00000237515/ENSG00000182195/ENSG00000141574/ENSG00000078401/ENSG00000115380/ENSG00000175505/ENSG00000128165/ENSG00000129682/ENSG00000092969…	TFF1/CACNG4/WNT7B/DKK1/VGF/GDF15/GPRC5A/PDGFB/INHBB/NCOA3/SHH/STC1/PSCA/OSGIN1/CXCL12/TGFA/SHISA9/LDOC1/SECTM1/EDN1/EFEMP1/CLCF1/ADM2/FGF13/TGFB2/NRP1/STC2/THNSL2/LYPD6B/BMP7/IL17C/NRG3/WNT4/HFE/ZP3/MACC1/CNIH2/ARC/IL32/LYNX1/PDGFA/ANGPTL8/CXCL16/TNFSF10/NMB/EDN2/INHA/PRKCD/FAM3B/ARTN/IL20/AREG/CAPN1/CXCL8/CRLF1/GRN/CCL2/SLURP1/RABEP2/METRNL/ADRA2B/TGFB3/ZFYVE28/CCL22/CCL28/IL24/NOV/JAG1/JAG2/KCN…	101
BP	GO:1902905	positive regulation of supramolecular fiber organization	52|2653	174|14725	8.48744e-05	0.00714592	ENSG00000006747/ENSG00000161905/ENSG00000090339/ENSG00000125968/ENSG00000078401/ENSG00000248905/ENSG00000124145/ENSG00000099250/ENSG00000146904/ENSG00000112902/ENSG00000171992/ENSG00000162552/ENSG00000102879/ENSG00000148180/ENSG00000050327/ENSG00000172403/ENSG00000125753/ENSG00000106526/ENSG00000074964/ENSG00000120885/ENSG00000126353/ENSG00000172725/ENSG00000140416/ENSG00000130429/ENSG00000089159…	SCIN/ALOX15/ICAM1/ID1/EDN1/FMN1/SDC4/NRP1/EPHA1/SEMA5A/SYNPO/WNT4/CORO1A/GSN/ARHGEF5/SYNPO2/VASP/ACTR3C/ARHGEF10L/CLU/CCR7/CORO1B/TPM1/ARPC1B/PXN/WAS/TGFB3/CDKN1B/WDR1/HCK/SMAD3/ARPC4/SPIRE2/CTTN/NUMA1/HIP1R/TESK1/CCL26/MYO1C/CFL1/VIL1/TRPV4/BRK1/S100A10/ARPC5L/LIMK1/GRB2/CYFIP1/PYCARD/FES/WASL/NPHS1	52
BP	GO:0031589	cell-substrate adhesion	79|2653	294|14725	9.56367e-05	0.00782856	ENSG00000137801/ENSG00000184292/ENSG00000198910/ENSG00000124126/ENSG00000092929/ENSG00000106541/ENSG00000132470/ENSG00000189058/ENSG00000006327/ENSG00000124466/ENSG00000161905/ENSG00000100097/ENSG00000026508/ENSG00000141376/ENSG00000169242/ENSG00000168542/ENSG00000125968/ENSG00000173156/ENSG00000115221/ENSG00000173801/ENSG00000187244/ENSG00000131669/ENSG00000005884/ENSG00000248905/ENSG00000124145…	THBS1/TACSTD2/L1CAM/PREX1/UNC13D/AGR2/ITGB4/APOD/TNFRSF12A/LYPD3/ALOX15/LGALS1/CD44/BCAS3/EFNA1/COL3A1/ID1/RHOD/ITGB6/JUP/BCAM/NINJ1/ITGA3/FMN1/SDC4/NPNT/NRP1/EPHA1/CDH13/WNT4/BCL6/CORO1A/MICALL2/PIK3R1/AJAP1/SLC9A1/EPHB3/LAMA5/EMP2/ACER2/SMOC2/EPB41L5/CCR7/DMTN/PTPRJ/FLNA/PXN/CD63/ADAM15/FN1/CIB1/TRIP6/CCL28/JAG1/ITGB5/SMAD3/PTPRK/CTTN/VWA2/CAMSAP3/NOTCH1/PARVA/ACTN1/ITGB7/VEGFA/S100A10/RELL2/ZY…	79
BP	GO:0090132	epithelium migration	71|2653	258|14725	9.5758e-05	0.00782856	ENSG00000137801/ENSG00000184292/ENSG00000107485/ENSG00000132698/ENSG00000100311/ENSG00000145632/ENSG00000140832/ENSG00000159167/ENSG00000138061/ENSG00000141376/ENSG00000169242/ENSG00000106211/ENSG00000125968/ENSG00000138772/ENSG00000205542/ENSG00000173801/ENSG00000179388/ENSG00000005884/ENSG00000078401/ENSG00000136826/ENSG00000092969/ENSG00000099250/ENSG00000067066/ENSG00000112902/ENSG00000168874…	THBS1/TACSTD2/GATA3/RAB25/PDGFB/PLK2/MARVELD3/STC1/CYP1B1/BCAS3/EFNA1/HSPB1/ID1/ANXA3/TMSB4X/JUP/EGR3/ITGA3/EDN1/KLF4/TGFB2/NRP1/SP100/SEMA5A/ATOH8/CDH13/SEMA4A/GRHL2/ZC3H12A/EMP2/STAT5A/S100P/EPB41L5/PLXND1/CORO1B/AKT1/MMP9/RHOB/PXN/KRT16/MYH9/CIB1/PLEKHG5/NOV/EPHA2/NR2F2/GIPC1/EPHB4/BCAR1/P2RX4/NOTCH1/PDCD6/CTSH/LOXL2/VEGFA/VIL1/PLCG1/FGF18/MIR200A/DLL4/DAB2IP/PRKD2/SCARB1/EFNB2/ADGRB1/STARD13/…	71
BP	GO:0038127	ERBB signaling pathway	45|2653	146|14725	0.000112289	0.00888221	ENSG00000065361/ENSG00000013588/ENSG00000106541/ENSG00000141738/ENSG00000101213/ENSG00000163235/ENSG00000178568/ENSG00000115380/ENSG00000147689/ENSG00000007384/ENSG00000140945/ENSG00000164850/ENSG00000145675/ENSG00000168143/ENSG00000169247/ENSG00000142208/ENSG00000109321/ENSG00000100985/ENSG00000149177/ENSG00000089159/ENSG00000013364/ENSG00000274286/ENSG00000159733/ENSG00000050820/ENSG00000130787…	ERBB3/GPRC5A/AGR2/GRB7/PTK6/TGFA/ERBB4/EFEMP1/FAM83A/RHBDF1/CDH13/GPER1/PIK3R1/FAM83B/SH3TC2/AKT1/AREG/MMP9/PTPRJ/PXN/MVP/ADRA2B/ZFYVE28/BCAR1/HIP1R/CBLC/AFAP1L2/VIL1/RHBDF2/PLCG1/ADRA2C/EGF/UBC/GRB2/DAB2IP/ZGPAT/EPS15L1/SHC1/HRAS/PTPN18/RNF115/FES/ERBB2/SHKBP1/PTPN3	45
BP	GO:0032535	regulation of cellular component size	82|2653	309|14725	0.000112554	0.00888221	ENSG00000198910/ENSG00000188064/ENSG00000124126/ENSG00000143320/ENSG00000006747/ENSG00000006327/ENSG00000161905/ENSG00000107562/ENSG00000090339/ENSG00000001617/ENSG00000205542/ENSG00000109062/ENSG00000171587/ENSG00000165731/ENSG00000078401/ENSG00000248905/ENSG00000129682/ENSG00000099250/ENSG00000172830/ENSG00000112902/ENSG00000104783/ENSG00000105695/ENSG00000102879/ENSG00000089820/ENSG00000091129…	L1CAM/WNT7B/PREX1/CRABP2/SCIN/TNFRSF12A/ALOX15/CXCL12/ICAM1/SEMA3F/TMSB4X/SLC9A3R1/DSCAM/RET/EDN1/FMN1/FGF13/NRP1/SSH3/SEMA5A/KCNN4/MAG/CORO1A/ARHGAP4/NRCAM/FSTL4/GSN/OLFM1/RARG/ULK2/VASP/ACTR3C/CCR7/CORO1B/PRKCD/DMTN/AKT1/ARPC1B/LAMTOR5/WAS/FN1/WDR1/CDHR2/VAV2/HCK/ARPC4/DEPTOR/RAB22A/SPIRE2/PLXNA3/PEX11A/CTTN/HIP1R/PPP1CA/ARHGAP35/PEX11B/CCL26/MYO1C/PLXNA4/CFL1/RNF6/VEGFA/VIL1/AP2M1/TRPV4/BRK1/A…	82
BP	GO:0010811	positive regulation of cell-substrate adhesion	33|2653	97|14725	0.000113897	0.00888221	ENSG00000124126/ENSG00000092929/ENSG00000106541/ENSG00000161905/ENSG00000173801/ENSG00000131669/ENSG00000005884/ENSG00000248905/ENSG00000124145/ENSG00000168743/ENSG00000099250/ENSG00000146904/ENSG00000140945/ENSG00000162552/ENSG00000213853/ENSG00000112562/ENSG00000115109/ENSG00000126353/ENSG00000158856/ENSG00000149177/ENSG00000196924/ENSG00000115414/ENSG00000185043/ENSG00000151882/ENSG00000166949…	PREX1/UNC13D/AGR2/ALOX15/JUP/NINJ1/ITGA3/FMN1/SDC4/NPNT/NRP1/EPHA1/CDH13/WNT4/EMP2/SMOC2/EPB41L5/CCR7/DMTN/PTPRJ/FLNA/FN1/CIB1/CCL28/SMAD3/VEGFA/S100A10/RELL2/MYADM/COL16A1/DAG1/DOCK5/VEGFC	33
BP	GO:0010631	epithelial cell migration	70|2653	255|14725	0.000116067	0.00888221	ENSG00000137801/ENSG00000184292/ENSG00000107485/ENSG00000132698/ENSG00000100311/ENSG00000145632/ENSG00000140832/ENSG00000159167/ENSG00000138061/ENSG00000141376/ENSG00000169242/ENSG00000106211/ENSG00000125968/ENSG00000138772/ENSG00000205542/ENSG00000173801/ENSG00000179388/ENSG00000005884/ENSG00000078401/ENSG00000136826/ENSG00000092969/ENSG00000099250/ENSG00000067066/ENSG00000112902/ENSG00000168874…	THBS1/TACSTD2/GATA3/RAB25/PDGFB/PLK2/MARVELD3/STC1/CYP1B1/BCAS3/EFNA1/HSPB1/ID1/ANXA3/TMSB4X/JUP/EGR3/ITGA3/EDN1/KLF4/TGFB2/NRP1/SP100/SEMA5A/ATOH8/CDH13/SEMA4A/ZC3H12A/EMP2/STAT5A/S100P/EPB41L5/PLXND1/CORO1B/AKT1/MMP9/RHOB/PXN/KRT16/MYH9/CIB1/PLEKHG5/NOV/EPHA2/NR2F2/GIPC1/EPHB4/BCAR1/P2RX4/NOTCH1/PDCD6/CTSH/LOXL2/VEGFA/VIL1/PLCG1/FGF18/MIR200A/DLL4/DAB2IP/PRKD2/SCARB1/EFNB2/ADGRB1/STARD13/HDAC7/…	70
BP	GO:0090130	tissue migration	72|2653	264|14725	0.000116519	0.00888221	ENSG00000137801/ENSG00000184292/ENSG00000107485/ENSG00000132698/ENSG00000100311/ENSG00000145632/ENSG00000140832/ENSG00000159167/ENSG00000138061/ENSG00000141376/ENSG00000169242/ENSG00000106211/ENSG00000125968/ENSG00000138772/ENSG00000205542/ENSG00000173801/ENSG00000179388/ENSG00000005884/ENSG00000163017/ENSG00000078401/ENSG00000136826/ENSG00000092969/ENSG00000099250/ENSG00000067066/ENSG00000112902…	THBS1/TACSTD2/GATA3/RAB25/PDGFB/PLK2/MARVELD3/STC1/CYP1B1/BCAS3/EFNA1/HSPB1/ID1/ANXA3/TMSB4X/JUP/EGR3/ITGA3/ACTG2/EDN1/KLF4/TGFB2/NRP1/SP100/SEMA5A/ATOH8/CDH13/SEMA4A/GRHL2/ZC3H12A/EMP2/STAT5A/S100P/EPB41L5/PLXND1/CORO1B/AKT1/MMP9/RHOB/PXN/KRT16/MYH9/CIB1/PLEKHG5/NOV/EPHA2/NR2F2/GIPC1/EPHB4/BCAR1/P2RX4/NOTCH1/PDCD6/CTSH/LOXL2/VEGFA/VIL1/PLCG1/FGF18/MIR200A/DLL4/DAB2IP/PRKD2/SCARB1/EFNB2/ADGRB1/ST…	72
BP	GO:0030104	water homeostasis	23|2653	59|14725	0.000122004	0.00901885	ENSG00000111319/ENSG00000189143/ENSG00000175793/ENSG00000158055/ENSG00000163347/ENSG00000165272/ENSG00000144452/ENSG00000175707/ENSG00000167306/ENSG00000173175/ENSG00000134317/ENSG00000073282/ENSG00000188191/ENSG00000168447/ENSG00000166828/ENSG00000087460/ENSG00000186832/ENSG00000109501/ENSG00000111199/ENSG00000162104/ENSG00000174233/ENSG00000163472/ENSG00000049759	SCNN1A/CLDN4/SFN/GRHL3/CLDN1/AQP3/ABCA12/KDF1/MYO5B/ADCY5/GRHL1/TP63/PRKAR1B/SCNN1B/SCNN1G/GNAS/KRT16/WFS1/TRPV4/ADCY9/ADCY6/TMEM79/NEDD4L	23
BP	GO:0060444	branching involved in mammary gland duct morphogenesis	12|2653	22|14725	0.000122431	0.00901885	ENSG00000091831/ENSG00000082175/ENSG00000162552/ENSG00000169083/ENSG00000244405/ENSG00000109321/ENSG00000111424/ENSG00000120149/ENSG00000142627/ENSG00000162337/ENSG00000117139/ENSG00000204580	ESR1/PGR/WNT4/AR/ETV5/AREG/VDR/MSX2/EPHA2/LRP5/KDM5B/DDR1	12
BP	GO:0061564	axon development	113|2653	454|14725	0.000123108	0.00901885	ENSG00000198910/ENSG00000151892/ENSG00000107485/ENSG00000143320/ENSG00000176884/ENSG00000189058/ENSG00000006327/ENSG00000164690/ENSG00000185924/ENSG00000141738/ENSG00000198753/ENSG00000107562/ENSG00000124171/ENSG00000169242/ENSG00000001617/ENSG00000154654/ENSG00000132561/ENSG00000103260/ENSG00000171587/ENSG00000165731/ENSG00000197956/ENSG00000164050/ENSG00000136826/ENSG00000075223/ENSG00000129682…	L1CAM/GFRA1/GATA3/CRABP2/GRIN1/APOD/TNFRSF12A/SHH/RTN4RL1/GRB7/PLXNB3/CXCL12/PARD6B/EFNA1/SEMA3F/NCAM2/MATN2/METRN/DSCAM/RET/S100A6/PLXNB1/KLF4/SEMA3C/FGF13/ANOS1/NRP1/SLITRK6/SSH3/TSKU/MAP2/SEMA5A/GFRA3/DSCAML1/BMP7/PLXNB2/MAG/SEMA4A/ARHGAP4/NRCAM/FSTL4/NTN4/PIK3R1/EPHB3/OLFM1/ULK2/SEMA3B/SLITRK4/SCN1B/FAM129B/VASP/GAB2/ARX/CERS2/RAP1GAP/TUBB3/NR4A2/PLXND1/CXCR4/EFNA4/ARTN/SLIT1/SIAH2/COBL/FOLR1…	113
BP	GO:0001667	ameboidal-type cell migration	88|2653	338|14725	0.000133269	0.00963805	ENSG00000137801/ENSG00000184292/ENSG00000107485/ENSG00000132698/ENSG00000100311/ENSG00000145632/ENSG00000164690/ENSG00000140832/ENSG00000159167/ENSG00000138061/ENSG00000141376/ENSG00000169242/ENSG00000001617/ENSG00000106211/ENSG00000125968/ENSG00000138772/ENSG00000205542/ENSG00000178568/ENSG00000165731/ENSG00000173801/ENSG00000179388/ENSG00000005884/ENSG00000078401/ENSG00000124145/ENSG00000136826…	THBS1/TACSTD2/GATA3/RAB25/PDGFB/PLK2/SHH/MARVELD3/STC1/CYP1B1/BCAS3/EFNA1/SEMA3F/HSPB1/ID1/ANXA3/TMSB4X/ERBB4/RET/JUP/EGR3/ITGA3/EDN1/SDC4/KLF4/SEMA3C/TGFB2/NRP1/SP100/SEMA5A/BMP7/ATOH8/CDH13/SEMA4A/ARHGAP4/ZC3H12A/LAMA5/EMP2/STAT5A/S100P/EPB41L5/PLXND1/CORO1B/DMTN/AKT1/MMP9/RHOB/PXN/KRT16/MYH9/FOLR1/CIB1/PLEKHG5/NOV/EPHA2/OVOL2/NR2F2/GIPC1/EPHB4/BCAR1/ARID5B/LRP5/P2RX4/MESP1/NOTCH1/PDCD6/CFL1/IT…	88
BP	GO:0035272	exocrine system development	19|2653	45|14725	0.000135336	0.00966368	ENSG00000103067/ENSG00000164690/ENSG00000167964/ENSG00000143061/ENSG00000100219/ENSG00000075223/ENSG00000092969/ENSG00000099250/ENSG00000101144/ENSG00000125534/ENSG00000074527/ENSG00000130702/ENSG00000197461/ENSG00000004399/ENSG00000119699/ENSG00000101439/ENSG00000198959/ENSG00000173402/ENSG00000114859	ESRP2/SHH/RAB26/IGSF3/XBP1/SEMA3C/TGFB2/NRP1/BMP7/PPDPF/NTN4/LAMA5/PDGFA/PLXND1/TGFB3/CST3/TGM2/DAG1/CLCN2	19
BP	GO:1901184	regulation of ERBB signaling pathway	32|2653	94|14725	0.000141682	0.00999036	ENSG00000065361/ENSG00000013588/ENSG00000106541/ENSG00000101213/ENSG00000163235/ENSG00000178568/ENSG00000007384/ENSG00000140945/ENSG00000164850/ENSG00000169247/ENSG00000142208/ENSG00000100985/ENSG00000149177/ENSG00000274286/ENSG00000159733/ENSG00000130787/ENSG00000142273/ENSG00000169129/ENSG00000129667/ENSG00000184160/ENSG00000138798/ENSG00000150991/ENSG00000177885/ENSG00000136848/ENSG00000197114…	ERBB3/GPRC5A/AGR2/PTK6/TGFA/ERBB4/RHBDF1/CDH13/GPER1/SH3TC2/AKT1/MMP9/PTPRJ/ADRA2B/ZFYVE28/HIP1R/CBLC/AFAP1L2/RHBDF2/ADRA2C/EGF/UBC/GRB2/DAB2IP/ZGPAT/EPS15L1/SHC1/PTPN18/RNF115/ERBB2/SHKBP1/PTPN3	32
BP	GO:0010810	regulation of cell-substrate adhesion	51|2653	173|14725	0.000144408	0.0100067	ENSG00000137801/ENSG00000184292/ENSG00000124126/ENSG00000092929/ENSG00000106541/ENSG00000189058/ENSG00000161905/ENSG00000100097/ENSG00000141376/ENSG00000173156/ENSG00000173801/ENSG00000131669/ENSG00000005884/ENSG00000248905/ENSG00000124145/ENSG00000168743/ENSG00000099250/ENSG00000146904/ENSG00000140945/ENSG00000162552/ENSG00000113916/ENSG00000145675/ENSG00000196581/ENSG00000090020/ENSG00000213853…	THBS1/TACSTD2/PREX1/UNC13D/AGR2/APOD/ALOX15/LGALS1/BCAS3/RHOD/JUP/NINJ1/ITGA3/FMN1/SDC4/NPNT/NRP1/EPHA1/CDH13/WNT4/BCL6/PIK3R1/AJAP1/SLC9A1/EMP2/ACER2/SMOC2/EPB41L5/CCR7/DMTN/PTPRJ/FLNA/ADAM15/FN1/CIB1/CCL28/JAG1/SMAD3/CAMSAP3/NOTCH1/VEGFA/S100A10/RELL2/MYADM/COL16A1/DAG1/ONECUT1/DOCK5/SERPINE1/DDR1/VEGFC	51
BP	GO:0048608	reproductive structure development	99|2653	390|14725	0.000147036	0.0100067	ENSG00000171345/ENSG00000170421/ENSG00000091831/ENSG00000166145/ENSG00000129514/ENSG00000149418/ENSG00000107485/ENSG00000188064/ENSG00000205336/ENSG00000128564/ENSG00000100311/ENSG00000163083/ENSG00000176046/ENSG00000176788/ENSG00000167642/ENSG00000184557/ENSG00000164690/ENSG00000159167/ENSG00000064195/ENSG00000116016/ENSG00000143552/ENSG00000171223/ENSG00000090339/ENSG00000087510/ENSG00000176720…	KRT19/KRT8/ESR1/SPINT1/FOXA1/ST14/GATA3/WNT7B/ADGRG1/VGF/PDGFB/INHBB/NUPR1/BASP1/SPINT2/SOCS3/SHH/STC1/DLX3/EPAS1/NUP210L/JUNB/ICAM1/TFAP2C/BOK/BIK/PEG10/LFNG/ASCL2/LDOC1/PGR/AKR1C3/DMRTA1/TGFB2/STC2/SDC1/SCX/RARA/CCND1/BMP7/WNT4/RXRA/ZP3/TP63/GRHL2/AR/RARG/NRK/TNFSF10/GJB2/INHA/FSTL3/GJB3/ZFP36L1/AKT1/CEBPB/MMP19/CRIP1/VDR/STRA6/ADAM15/CDKN1B/IRX5/OVOL2/CITED2/HS6ST1/NR2F2/SERPINA5/PLCD3/ARID5B/…	99
BP	GO:0007431	salivary gland development	16|2653	35|14725	0.000147697	0.0100067	ENSG00000103067/ENSG00000164690/ENSG00000100219/ENSG00000075223/ENSG00000092969/ENSG00000099250/ENSG00000101144/ENSG00000074527/ENSG00000130702/ENSG00000197461/ENSG00000004399/ENSG00000119699/ENSG00000101439/ENSG00000198959/ENSG00000173402/ENSG00000114859	ESRP2/SHH/XBP1/SEMA3C/TGFB2/NRP1/BMP7/NTN4/LAMA5/PDGFA/PLXND1/TGFB3/CST3/TGM2/DAG1/CLCN2	16
BP	GO:0050891	multicellular organismal water homeostasis	22|2653	56|14725	0.000149009	0.0100067	ENSG00000111319/ENSG00000189143/ENSG00000175793/ENSG00000158055/ENSG00000163347/ENSG00000165272/ENSG00000144452/ENSG00000175707/ENSG00000167306/ENSG00000173175/ENSG00000134317/ENSG00000073282/ENSG00000188191/ENSG00000168447/ENSG00000166828/ENSG00000087460/ENSG00000186832/ENSG00000109501/ENSG00000111199/ENSG00000162104/ENSG00000174233/ENSG00000163472	SCNN1A/CLDN4/SFN/GRHL3/CLDN1/AQP3/ABCA12/KDF1/MYO5B/ADCY5/GRHL1/TP63/PRKAR1B/SCNN1B/SCNN1G/GNAS/KRT16/WFS1/TRPV4/ADCY9/ADCY6/TMEM79	22
BP	GO:2001026	regulation of endothelial cell chemotaxis	9|2653	14|14725	0.000164583	0.0109225	ENSG00000137801/ENSG00000106211/ENSG00000205542/ENSG00000112902/ENSG00000135124/ENSG00000148400/ENSG00000112715/ENSG00000156427/ENSG00000105287	THBS1/HSPB1/TMSB4X/SEMA5A/P2RX4/NOTCH1/VEGFA/FGF18/PRKD2	9
BP	GO:0045616	regulation of keratinocyte differentiation	15|2653	32|14725	0.000167682	0.0109339	ENSG00000124151/ENSG00000165272/ENSG00000159216/ENSG00000134317/ENSG00000073282/ENSG00000083307/ENSG00000185650/ENSG00000162891/ENSG00000111424/ENSG00000120149/ENSG00000125850/ENSG00000137497/ENSG00000027075/ENSG00000148400/ENSG00000221926	NCOA3/AQP3/RUNX1/GRHL1/TP63/GRHL2/ZFP36L1/IL20/VDR/MSX2/OVOL2/NUMA1/PRKCH/NOTCH1/TRIM16	15
BP	GO:0002237	response to molecule of bacterial origin	74|2653	276|14725	0.000168632	0.0109339	ENSG00000189334/ENSG00000172936/ENSG00000163347/ENSG00000171223/ENSG00000090339/ENSG00000178726/ENSG00000111321/ENSG00000128604/ENSG00000128016/ENSG00000078401/ENSG00000100219/ENSG00000104689/ENSG00000171522/ENSG00000170345/ENSG00000100906/ENSG00000131759/ENSG00000129038/ENSG00000148344/ENSG00000215788/ENSG00000186891/ENSG00000163874/ENSG00000140465/ENSG00000134326/ENSG00000108443/ENSG00000180176…	S100A14/MYD88/CLDN1/JUNB/ICAM1/THBD/LTBR/IRF5/ZFP36/EDN1/XBP1/TNFRSF10A/PTGER4/FOS/NFKBIA/RARA/LOXL1/PTGES/TNFRSF25/TNFRSF18/ZC3H12A/CYP1A1/CMPK2/RPS6KB1/TH/SLC11A1/TRIM5/S100A8/TFPI/GJB2/UGT1A1/JUND/CCR7/TNFRSF1A/AKT1/CEBPB/LITAF/SIGIRR/CXCL8/MAPKAPK2/CCL2/CARD9/NFKB2/ABCA1/TLR2/COMT/ASS1/IL24/HCK/TICAM1/NGFR/ABR/ALAD/TNFRSF11B/SBNO2/CCL20/TNFRSF21/NOTCH1/PALM3/TNIP2/SELE/NR1D1/IRF3/DAB2IP/INAVA…	74
BP	GO:0051495	positive regulation of cytoskeleton organization	56|2653	196|14725	0.000175867	0.0111739	ENSG00000006747/ENSG00000161905/ENSG00000141376/ENSG00000090339/ENSG00000125968/ENSG00000078401/ENSG00000248905/ENSG00000124145/ENSG00000099250/ENSG00000146904/ENSG00000112902/ENSG00000171992/ENSG00000162552/ENSG00000102879/ENSG00000148180/ENSG00000050327/ENSG00000172403/ENSG00000125753/ENSG00000106526/ENSG00000074964/ENSG00000126353/ENSG00000172725/ENSG00000140416/ENSG00000130429/ENSG00000089159…	SCIN/ALOX15/BCAS3/ICAM1/ID1/EDN1/FMN1/SDC4/NRP1/EPHA1/SEMA5A/SYNPO/WNT4/CORO1A/GSN/ARHGEF5/SYNPO2/VASP/ACTR3C/ARHGEF10L/CCR7/CORO1B/TPM1/ARPC1B/PXN/WAS/TGFB3/CDKN1B/WDR1/HCK/SMAD3/ARPC4/SPIRE2/PLXNA3/CTTN/NUMA1/HIP1R/TESK1/CCL26/MYO1C/CFL1/VIL1/TRPV4/BRK1/NES/S100A10/ARPC5L/LIMK1/GRB2/CYFIP1/HRAS/PYCARD/FES/WASL/NTRK3/NPHS1	56
BP	GO:0007043	cell-cell junction assembly	31|2653	91|14725	0.000176294	0.0111739	ENSG00000165215/ENSG00000184363/ENSG00000140832/ENSG00000163347/ENSG00000130545/ENSG00000124171/ENSG00000010278/ENSG00000124429/ENSG00000173801/ENSG00000102981/ENSG00000159216/ENSG00000164877/ENSG00000083307/ENSG00000165474/ENSG00000105974/ENSG00000155366/ENSG00000158769/ENSG00000071127/ENSG00000105699/ENSG00000057294/ENSG00000152939/ENSG00000027075/ENSG00000197879/ENSG00000150054/ENSG00000183153…	CLDN3/PKP3/MARVELD3/CLDN1/CRB3/PARD6B/CD9/POF1B/JUP/PARD6A/RUNX1/MICALL2/GRHL2/GJB2/CAV1/RHOC/F11R/WDR1/LSR/PKP2/MARVELD2/PRKCH/MYO1C/MPP7/GJD3/CTNNA1/TRPV4/SNAI1/HDAC7/FZD5/CDH5	31
BP	GO:0043062	extracellular structure organization	88|2653	341|14725	0.000184801	0.0114636	ENSG00000039068/ENSG00000137801/ENSG00000166145/ENSG00000163435/ENSG00000100311/ENSG00000103196/ENSG00000132470/ENSG00000069399/ENSG00000167642/ENSG00000120708/ENSG00000160179/ENSG00000138061/ENSG00000026508/ENSG00000196878/ENSG00000090339/ENSG00000168542/ENSG00000196562/ENSG00000115221/ENSG00000005884/ENSG00000124145/ENSG00000188157/ENSG00000168743/ENSG00000092969/ENSG00000136167/ENSG00000115884…	CDH1/THBS1/SPINT1/ELF3/PDGFB/CRISPLD2/ITGB4/BCL3/SPINT2/TGFBI/ABCG1/CYP1B1/CD44/LAMB3/ICAM1/COL3A1/SULF2/ITGB6/ITGA3/SDC4/AGRN/NPNT/TGFB2/LCP1/SDC1/SCX/BMP7/THSD4/LOXL1/COL12A1/LAMA5/B4GALT1/ANXA2/COL18A1/PDGFA/MMP15/SMOC2/PLOD3/SOAT2/ITGAM/HPN/MMP19/MMP9/CAPN1/TEX14/NR1H2/F11R/NFKB2/ADAM15/HSPG2/ABCA1/FN1/ITGB5/SMAD3/MMP16/LAMC2/CHADL/LAMB2/TNFRSF11B/VWA1/SERPINB5/CD47/COL9A2/MMP13/NOTCH1/TTR/KA…	88
BP	GO:0042119	neutrophil activation	107|2653	430|14725	0.000186062	0.0114636	ENSG00000124126/ENSG00000092929/ENSG00000131981/ENSG00000118640/ENSG00000103196/ENSG00000111679/ENSG00000026508/ENSG00000163220/ENSG00000163191/ENSG00000138772/ENSG00000081277/ENSG00000117984/ENSG00000173801/ENSG00000006534/ENSG00000176978/ENSG00000130303/ENSG00000163636/ENSG00000125730/ENSG00000178372/ENSG00000116260/ENSG00000148346/ENSG00000051523/ENSG00000147813/ENSG00000129353/ENSG00000172794…	PREX1/UNC13D/LGALS3/VAMP8/CRISPLD2/PTPN6/CD44/S100A9/S100A11/ANXA3/PKP1/CTSD/JUP/ALDH3B1/DPP7/BST2/PSMD6/C3/CALML5/QSOX1/LCN2/CYBA/NAPRT/SLC44A2/RAB37/GSN/LRG1/B4GALT1/ANXA2/FTH1/SLC11A1/CEACAM6/CTSA/NBEAL2/S100A8/S100P/RAB3D/HSPA6/PADI2/PRKCD/PDXK/TSPAN14/TMC6/ITGAM/MMP9/PTPRJ/CAPN1/CXCL8/GRN/CD63/MVP/PTPRN2/GALNS/TMEM173/IMPDH1/TLR2/SNAP25/TCIRG1/ABR/PFKL/ALAD/ACAA1/CPPED1/CNN2/DNASE1/CD47/CRIS…	107
BP	GO:0016339	calcium-dependent cell-cell adhesion via plasma membrane cell adhesion molecules	14|2653	29|14725	0.000186962	0.0114636	ENSG00000112852/ENSG00000113205/ENSG00000187372/ENSG00000120327/ENSG00000272674/ENSG00000140945/ENSG00000177839/ENSG00000081818/ENSG00000197479/ENSG00000120324/ENSG00000113211/ENSG00000099889/ENSG00000240184/ENSG00000188404	PCDHB2/PCDHB3/PCDHB13/PCDHB14/PCDHB16/CDH13/PCDHB9/PCDHB4/PCDHB11/PCDHB10/PCDHB6/ARVCF/PCDHGC3/SELL	14
BP	GO:0098542	defense response to other organism	87|2653	337|14725	0.000197779	0.0117407	ENSG00000169871/ENSG00000128564/ENSG00000092929/ENSG00000189334/ENSG00000184678/ENSG00000069399/ENSG00000172936/ENSG00000273802/ENSG00000142089/ENSG00000115267/ENSG00000187608/ENSG00000157601/ENSG00000111331/ENSG00000163220/ENSG00000166801/ENSG00000128604/ENSG00000138772/ENSG00000138496/ENSG00000156127/ENSG00000135114/ENSG00000180596/ENSG00000130303/ENSG00000163840/ENSG00000124635/ENSG00000051523…	TRIM56/VGF/UNC13D/S100A14/HIST2H2BE/BCL3/MYD88/HIST1H2BG/IFITM3/IFIH1/ISG15/MX1/OAS3/S100A9/FAM111A/IRF5/ANXA3/PARP9/BATF/OASL/HIST1H2BC/BST2/DTX3L/HIST1H2BJ/CYBA/HIST1H2BK/PGLYRP2/OAS2/CLEC7A/CGAS/ZC3H12A/OAS1/HIST1H2BF/SLC11A1/TRIM5/S100A8/ISG20/APOBEC3B/PRKCD/TNFRSF1A/IFIT2/CEBPB/IFITM2/CARD9/IRF2/C19orf66/IL17RC/TRIM25/DDIT4/TMEM173/TRAF3IP2/TLR2/IFITM1/BIRC3/TICAM1/ZMYND11/IFIT3/UNC93B1/RARR…	87
BP	GO:1902903	regulation of supramolecular fiber organization	77|2653	291|14725	0.000197851	0.0117407	ENSG00000184292/ENSG00000124126/ENSG00000006747/ENSG00000161905/ENSG00000107562/ENSG00000090339/ENSG00000125968/ENSG00000205542/ENSG00000078401/ENSG00000248905/ENSG00000124145/ENSG00000171522/ENSG00000129682/ENSG00000099250/ENSG00000172830/ENSG00000146904/ENSG00000078018/ENSG00000112902/ENSG00000171992/ENSG00000162552/ENSG00000102879/ENSG00000148180/ENSG00000050327/ENSG00000145675/ENSG00000090020…	TACSTD2/PREX1/SCIN/ALOX15/CXCL12/ICAM1/ID1/TMSB4X/EDN1/FMN1/SDC4/PTGER4/FGF13/NRP1/SSH3/EPHA1/MAP2/SEMA5A/SYNPO/WNT4/CORO1A/GSN/ARHGEF5/PIK3R1/SLC9A1/SYNPO2/VASP/ACTR3C/ARHGEF10L/CLU/CCR7/CORO1B/PRKCD/DMTN/TPM1/ARPC1B/PXN/LDLR/WAS/TGFB3/C16orf45/CIB1/CDKN1B/WDR1/HCK/SMAD3/ARPC4/SPIRE2/CHADL/CTTN/NUMA1/HIP1R/TESK1/CAMSAP3/ARHGAP35/CCL26/MYO1C/MAP6D1/CFL1/VIL1/TRPV4/BRK1/S100A10/ARPC5L/TMOD3/LIMK1/…	77
BP	GO:0010884	positive regulation of lipid storage	10|2653	17|14725	0.000199806	0.0117407	ENSG00000263528/ENSG00000125730/ENSG00000214456/ENSG00000163874/ENSG00000135245/ENSG00000131408/ENSG00000197296/ENSG00000110047/ENSG00000073060/ENSG00000170419	IKBKE/C3/PLIN5/ZC3H12A/HILPDA/NR1H2/FITM2/EHD1/SCARB1/VSTM2A	10
BP	GO:0061436	establishment of skin barrier	10|2653	17|14725	0.000199806	0.0117407	ENSG00000189143/ENSG00000175793/ENSG00000158055/ENSG00000163347/ENSG00000144452/ENSG00000175707/ENSG00000134317/ENSG00000073282/ENSG00000186832/ENSG00000163472	CLDN4/SFN/GRHL3/CLDN1/ABCA12/KDF1/GRHL1/TP63/KRT16/TMEM79	10
BP	GO:0007409	axonogenesis	104|2653	417|14725	0.000207942	0.0120928	ENSG00000198910/ENSG00000151892/ENSG00000107485/ENSG00000143320/ENSG00000176884/ENSG00000006327/ENSG00000164690/ENSG00000141738/ENSG00000198753/ENSG00000107562/ENSG00000124171/ENSG00000169242/ENSG00000001617/ENSG00000132561/ENSG00000103260/ENSG00000171587/ENSG00000165731/ENSG00000197956/ENSG00000164050/ENSG00000075223/ENSG00000129682/ENSG00000011201/ENSG00000099250/ENSG00000184564/ENSG00000172830…	L1CAM/GFRA1/GATA3/CRABP2/GRIN1/TNFRSF12A/SHH/GRB7/PLXNB3/CXCL12/PARD6B/EFNA1/SEMA3F/MATN2/METRN/DSCAM/RET/S100A6/PLXNB1/SEMA3C/FGF13/ANOS1/NRP1/SLITRK6/SSH3/TSKU/MAP2/SEMA5A/GFRA3/DSCAML1/BMP7/PLXNB2/MAG/SEMA4A/ARHGAP4/NRCAM/FSTL4/NTN4/PIK3R1/EPHB3/OLFM1/ULK2/SEMA3B/SLITRK4/SCN1B/FAM129B/VASP/GAB2/ARX/RAP1GAP/TUBB3/NR4A2/PLXND1/CXCR4/EFNA4/ARTN/SLIT1/SIAH2/COBL/FN1/NECTIN1/BCL11B/CELSR3/NGFR/PLXN…	104
BP	GO:0002283	neutrophil activation involved in immune response	105|2653	422|14725	0.00021352	0.0121078	ENSG00000092929/ENSG00000131981/ENSG00000118640/ENSG00000103196/ENSG00000111679/ENSG00000026508/ENSG00000163220/ENSG00000163191/ENSG00000138772/ENSG00000081277/ENSG00000117984/ENSG00000173801/ENSG00000006534/ENSG00000176978/ENSG00000130303/ENSG00000163636/ENSG00000125730/ENSG00000178372/ENSG00000116260/ENSG00000148346/ENSG00000051523/ENSG00000147813/ENSG00000129353/ENSG00000172794/ENSG00000148180…	UNC13D/LGALS3/VAMP8/CRISPLD2/PTPN6/CD44/S100A9/S100A11/ANXA3/PKP1/CTSD/JUP/ALDH3B1/DPP7/BST2/PSMD6/C3/CALML5/QSOX1/LCN2/CYBA/NAPRT/SLC44A2/RAB37/GSN/LRG1/B4GALT1/ANXA2/FTH1/SLC11A1/CEACAM6/CTSA/NBEAL2/S100A8/S100P/RAB3D/HSPA6/PADI2/PRKCD/PDXK/TSPAN14/TMC6/ITGAM/MMP9/PTPRJ/CAPN1/GRN/CD63/MVP/PTPRN2/GALNS/TMEM173/IMPDH1/TLR2/SNAP25/TCIRG1/ABR/PFKL/ALAD/ACAA1/CPPED1/CNN2/DNASE1/CD47/CRISP3/DOCK2/GUS…	105
BP	GO:0031579	membrane raft organization	11|2653	20|14725	0.000214639	0.0121078	ENSG00000147676/ENSG00000148180/ENSG00000182718/ENSG00000213853/ENSG00000144063/ENSG00000105974/ENSG00000131378/ENSG00000134516/ENSG00000197747/ENSG00000179820/ENSG00000105971	MAL2/GSN/ANXA2/EMP2/MALL/CAV1/RFTN1/DOCK2/S100A10/MYADM/CAV2	11
BP	GO:0060445	branching involved in salivary gland morphogenesis	11|2653	20|14725	0.000214639	0.0121078	ENSG00000103067/ENSG00000164690/ENSG00000075223/ENSG00000099250/ENSG00000101144/ENSG00000074527/ENSG00000130702/ENSG00000197461/ENSG00000004399/ENSG00000198959/ENSG00000173402	ESRP2/SHH/SEMA3C/NRP1/BMP7/NTN4/LAMA5/PDGFA/PLXND1/TGM2/DAG1	11
BP	GO:0061458	reproductive system development	99|2653	394|14725	0.000219285	0.0122474	ENSG00000171345/ENSG00000170421/ENSG00000091831/ENSG00000166145/ENSG00000129514/ENSG00000149418/ENSG00000107485/ENSG00000188064/ENSG00000205336/ENSG00000128564/ENSG00000100311/ENSG00000163083/ENSG00000176046/ENSG00000176788/ENSG00000167642/ENSG00000184557/ENSG00000164690/ENSG00000159167/ENSG00000064195/ENSG00000116016/ENSG00000143552/ENSG00000171223/ENSG00000090339/ENSG00000087510/ENSG00000176720…	KRT19/KRT8/ESR1/SPINT1/FOXA1/ST14/GATA3/WNT7B/ADGRG1/VGF/PDGFB/INHBB/NUPR1/BASP1/SPINT2/SOCS3/SHH/STC1/DLX3/EPAS1/NUP210L/JUNB/ICAM1/TFAP2C/BOK/BIK/PEG10/LFNG/ASCL2/LDOC1/PGR/AKR1C3/DMRTA1/TGFB2/STC2/SDC1/SCX/RARA/CCND1/BMP7/WNT4/RXRA/ZP3/TP63/GRHL2/AR/RARG/NRK/TNFSF10/GJB2/INHA/FSTL3/GJB3/ZFP36L1/AKT1/CEBPB/MMP19/CRIP1/VDR/STRA6/ADAM15/CDKN1B/IRX5/OVOL2/CITED2/HS6ST1/NR2F2/SERPINA5/PLCD3/ARID5B/…	99
BP	GO:0007416	synapse assembly	40|2653	129|14725	0.00022832	0.012627	ENSG00000039068/ENSG00000162105/ENSG00000176884/ENSG00000158258/ENSG00000112852/ENSG00000124839/ENSG00000171587/ENSG00000113205/ENSG00000184845/ENSG00000087085/ENSG00000188157/ENSG00000184564/ENSG00000187372/ENSG00000120327/ENSG00000272674/ENSG00000175928/ENSG00000091129/ENSG00000182580/ENSG00000179542/ENSG00000177839/ENSG00000120322/ENSG00000004399/ENSG00000198739/ENSG00000081818/ENSG00000187957…	CDH1/SHANK2/GRIN1/CLSTN2/PCDHB2/RAB17/DSCAM/PCDHB3/DRD1/ACHE/AGRN/SLITRK6/PCDHB13/PCDHB14/PCDHB16/LRRN1/NRCAM/EPHB3/SLITRK4/PCDHB9/PCDHB8/PLXND1/LRRTM3/PCDHB4/DNER/SLIT1/TLR2/NECTIN1/PCDHB11/PCDHB10/PCDHB6/PCDHB15/PCDHB12/AMIGO1/NPTN/CLSTN1/ADGRB1/FZD5/SYNDIG1/NTRK3	40
BP	GO:0007173	epidermal growth factor receptor signaling pathway	39|2653	125|14725	0.00023576	0.0129119	ENSG00000013588/ENSG00000106541/ENSG00000141738/ENSG00000101213/ENSG00000163235/ENSG00000115380/ENSG00000147689/ENSG00000007384/ENSG00000140945/ENSG00000164850/ENSG00000145675/ENSG00000168143/ENSG00000142208/ENSG00000109321/ENSG00000100985/ENSG00000149177/ENSG00000089159/ENSG00000274286/ENSG00000159733/ENSG00000050820/ENSG00000130787/ENSG00000142273/ENSG00000169129/ENSG00000127831/ENSG00000129667…	GPRC5A/AGR2/GRB7/PTK6/TGFA/EFEMP1/FAM83A/RHBDF1/CDH13/GPER1/PIK3R1/FAM83B/AKT1/AREG/MMP9/PTPRJ/PXN/ADRA2B/ZFYVE28/BCAR1/HIP1R/CBLC/AFAP1L2/VIL1/RHBDF2/PLCG1/ADRA2C/EGF/UBC/GRB2/DAB2IP/ZGPAT/EPS15L1/SHC1/HRAS/RNF115/FES/SHKBP1/PTPN3	39
BP	GO:0032496	response to lipopolysaccharide	70|2653	261|14725	0.000246891	0.0133915	ENSG00000189334/ENSG00000172936/ENSG00000163347/ENSG00000171223/ENSG00000090339/ENSG00000178726/ENSG00000111321/ENSG00000128016/ENSG00000078401/ENSG00000100219/ENSG00000104689/ENSG00000171522/ENSG00000170345/ENSG00000100906/ENSG00000131759/ENSG00000129038/ENSG00000148344/ENSG00000215788/ENSG00000186891/ENSG00000163874/ENSG00000140465/ENSG00000134326/ENSG00000108443/ENSG00000180176/ENSG00000018280…	S100A14/MYD88/CLDN1/JUNB/ICAM1/THBD/LTBR/ZFP36/EDN1/XBP1/TNFRSF10A/PTGER4/FOS/NFKBIA/RARA/LOXL1/PTGES/TNFRSF25/TNFRSF18/ZC3H12A/CYP1A1/CMPK2/RPS6KB1/TH/SLC11A1/TRIM5/S100A8/TFPI/GJB2/UGT1A1/JUND/CCR7/TNFRSF1A/AKT1/CEBPB/LITAF/SIGIRR/CXCL8/MAPKAPK2/CCL2/NFKB2/ABCA1/TLR2/COMT/ASS1/IL24/HCK/TICAM1/NGFR/ABR/ALAD/TNFRSF11B/SBNO2/CCL20/TNFRSF21/NOTCH1/PALM3/TNIP2/SELE/NR1D1/IRF3/DAB2IP/SCARB1/PYCARD/MA…	70
BP	GO:0050808	synapse organization	71|2653	266|14725	0.000260982	0.0139932	ENSG00000039068/ENSG00000198910/ENSG00000188064/ENSG00000107984/ENSG00000162105/ENSG00000176884/ENSG00000158258/ENSG00000169242/ENSG00000169862/ENSG00000112852/ENSG00000124839/ENSG00000171587/ENSG00000085552/ENSG00000113205/ENSG00000005884/ENSG00000184845/ENSG00000087085/ENSG00000188157/ENSG00000173267/ENSG00000184564/ENSG00000187372/ENSG00000120327/ENSG00000272674/ENSG00000167535/ENSG00000171992…	CDH1/L1CAM/WNT7B/DKK1/SHANK2/GRIN1/CLSTN2/EFNA1/CTNND2/PCDHB2/RAB17/DSCAM/IGSF9/PCDHB3/ITGA3/DRD1/ACHE/AGRN/SNCG/SLITRK6/PCDHB13/PCDHB14/PCDHB16/CACNB3/SYNPO/LRRN1/P2RX2/DOCK10/NRCAM/ZMYND8/ARC/EPHB3/SLITRK4/PCDHB9/PCDHB8/PLXND1/LRRTM3/CAMK2B/PCDHB4/DNER/SLIT1/ETV5/TLR2/NECTIN1/SEZ6L2/PCDHB11/PCDHB10/PCDHB6/PCDHB15/IGF1R/ITPKA/LAMB2/PCDHB12/CTTN/ACTB/CFL1/DMPK/AMIGO1/MYO5A/DAB2IP/CYFIP1/LRRC4/NPT…	71
BP	GO:0042110	T cell activation	92|2653	363|14725	0.000262945	0.0139932	ENSG00000107485/ENSG00000124126/ENSG00000131981/ENSG00000069399/ENSG00000111679/ENSG00000164690/ENSG00000100097/ENSG00000090339/ENSG00000124813/ENSG00000113494/ENSG00000156127/ENSG00000196684/ENSG00000106003/ENSG00000101096/ENSG00000179388/ENSG00000100219/ENSG00000159216/ENSG00000124145/ENSG00000171522/ENSG00000136167/ENSG00000131759/ENSG00000115457/ENSG00000160685/ENSG00000162552/ENSG00000010704…	GATA3/PREX1/LGALS3/BCL3/PTPN6/SHH/LGALS1/ICAM1/RUNX2/PRLR/BATF/HSH2D/LFNG/NFATC2/EGR3/XBP1/RUNX1/SDC4/PTGER4/LCP1/RARA/IGFBP2/ZBTB7B/WNT4/HFE/ZP3/BCL6/SEMA4A/SOCS1/CORO1A/VTCN1/ZFPM1/TNFRSF18/CLEC7A/GSN/PIK3R1/DOCK8/ZFP36L2/HLA-DRB5/EGR1/SLC11A1/RELB/RORC/MAP3K8/CAV1/CCR7/ZFP36L1/ZMIZ1/AKT1/PPP3CA/CEBPB/CCL2/MYH9/MYB/WAS/SOX13/SMAD3/JAG2/BCL11B/HLA-DRB1/GPNMB/CD47/DOCK2/IFNL1/TNFRSF21/IRF1/RSAD2/…	92
BP	GO:0036230	granulocyte activation	107|2653	434|14725	0.000270331	0.0142517	ENSG00000124126/ENSG00000092929/ENSG00000131981/ENSG00000118640/ENSG00000103196/ENSG00000111679/ENSG00000026508/ENSG00000163220/ENSG00000163191/ENSG00000138772/ENSG00000081277/ENSG00000117984/ENSG00000173801/ENSG00000006534/ENSG00000176978/ENSG00000130303/ENSG00000163636/ENSG00000125730/ENSG00000178372/ENSG00000116260/ENSG00000148346/ENSG00000051523/ENSG00000147813/ENSG00000129353/ENSG00000172794…	PREX1/UNC13D/LGALS3/VAMP8/CRISPLD2/PTPN6/CD44/S100A9/S100A11/ANXA3/PKP1/CTSD/JUP/ALDH3B1/DPP7/BST2/PSMD6/C3/CALML5/QSOX1/LCN2/CYBA/NAPRT/SLC44A2/RAB37/GSN/LRG1/B4GALT1/ANXA2/FTH1/SLC11A1/CEACAM6/CTSA/NBEAL2/S100A8/S100P/RAB3D/HSPA6/PADI2/PRKCD/PDXK/TSPAN14/TMC6/ITGAM/MMP9/PTPRJ/CAPN1/CXCL8/GRN/CD63/MVP/PTPRN2/GALNS/TMEM173/IMPDH1/TLR2/SNAP25/TCIRG1/ABR/PFKL/ALAD/ACAA1/CPPED1/CNN2/DNASE1/CD47/CRIS…	107
BP	GO:0007266	Rho protein signal transduction	50|2653	173|14725	0.000282406	0.0147505	ENSG00000205336/ENSG00000124126/ENSG00000177106/ENSG00000168542/ENSG00000173156/ENSG00000127084/ENSG00000142675/ENSG00000131037/ENSG00000130762/ENSG00000142632/ENSG00000005884/ENSG00000008323/ENSG00000099250/ENSG00000140945/ENSG00000113916/ENSG00000089820/ENSG00000182957/ENSG00000050327/novel.697/ENSG00000074964/ENSG00000143878/ENSG00000183111/ENSG00000015285/ENSG00000165029/novel.699/ENSG0000016…	ADGRG1/PREX1/EPS8L2/COL3A1/RHOD/FGD3/CNKSR1/EPS8L1/ARHGEF16/ARHGEF19/ITGA3/PLEKHG6/NRP1/CDH13/BCL6/ARHGAP4/SPATA13/ARHGEF5/-/ARHGEF10L/RHOB/ARHGEF37/WAS/ABCA1/-/VAV2/PLEKHG5/PAK4/ARHGEF28/ARHGEF17/NGFR/MCF2L/ABR/ARHGAP1/CELSR1/ARHGAP35/CFL1/-/-/ARRB1/RIPOR1/RTN4R/LIMK1/ARHGDIB/FGD4/VAV3/OPHN1/ARHGEF1/ARHGEF38/VAV1	50
BP	GO:0043312	neutrophil degranulation	104|2653	421|14725	0.000303017	0.0156818	ENSG00000092929/ENSG00000131981/ENSG00000118640/ENSG00000103196/ENSG00000111679/ENSG00000026508/ENSG00000163220/ENSG00000163191/ENSG00000138772/ENSG00000081277/ENSG00000117984/ENSG00000173801/ENSG00000006534/ENSG00000176978/ENSG00000130303/ENSG00000163636/ENSG00000125730/ENSG00000178372/ENSG00000116260/ENSG00000148346/ENSG00000051523/ENSG00000147813/ENSG00000129353/ENSG00000172794/ENSG00000148180…	UNC13D/LGALS3/VAMP8/CRISPLD2/PTPN6/CD44/S100A9/S100A11/ANXA3/PKP1/CTSD/JUP/ALDH3B1/DPP7/BST2/PSMD6/C3/CALML5/QSOX1/LCN2/CYBA/NAPRT/SLC44A2/RAB37/GSN/LRG1/B4GALT1/ANXA2/FTH1/SLC11A1/CEACAM6/CTSA/NBEAL2/S100A8/S100P/RAB3D/HSPA6/PADI2/PRKCD/PDXK/TSPAN14/TMC6/ITGAM/MMP9/PTPRJ/CAPN1/GRN/CD63/MVP/PTPRN2/GALNS/TMEM173/IMPDH1/TLR2/SNAP25/TCIRG1/ABR/PFKL/ALAD/ACAA1/CPPED1/CNN2/CD47/CRISP3/DOCK2/GUSB/DSP/T…	104
BP	GO:0030198	extracellular matrix organization	78|2653	300|14725	0.000326223	0.0167293	ENSG00000039068/ENSG00000137801/ENSG00000166145/ENSG00000163435/ENSG00000100311/ENSG00000103196/ENSG00000132470/ENSG00000069399/ENSG00000167642/ENSG00000120708/ENSG00000138061/ENSG00000026508/ENSG00000196878/ENSG00000090339/ENSG00000168542/ENSG00000196562/ENSG00000115221/ENSG00000005884/ENSG00000188157/ENSG00000168743/ENSG00000092969/ENSG00000136167/ENSG00000260428/ENSG00000187720/ENSG00000129038…	CDH1/THBS1/SPINT1/ELF3/PDGFB/CRISPLD2/ITGB4/BCL3/SPINT2/TGFBI/CYP1B1/CD44/LAMB3/ICAM1/COL3A1/SULF2/ITGB6/ITGA3/AGRN/NPNT/TGFB2/LCP1/SCX/THSD4/LOXL1/COL12A1/LAMA5/B4GALT1/ANXA2/COL18A1/PDGFA/MMP15/SMOC2/PLOD3/ITGAM/HPN/MMP19/MMP9/CAPN1/F11R/NFKB2/ADAM15/HSPG2/FN1/ITGB5/SMAD3/MMP16/LAMC2/CHADL/LAMB2/TNFRSF11B/VWA1/SERPINB5/CD47/COL9A2/MMP13/NOTCH1/TTR/KAZALD1/FURIN/APBB2/ITGB7/MPZL3/LOXL2/CST3/SERP…	78
BP	GO:0022407	regulation of cell-cell adhesion	79|2653	305|14725	0.000340228	0.0172903	ENSG00000039068/ENSG00000129514/ENSG00000107485/ENSG00000119888/ENSG00000131981/ENSG00000167642/ENSG00000111679/ENSG00000161905/ENSG00000164690/ENSG00000100097/ENSG00000026508/ENSG00000107562/ENSG00000090339/ENSG00000010278/ENSG00000183044/ENSG00000197971/ENSG00000179388/ENSG00000100219/ENSG00000124145/ENSG00000136826/ENSG00000131759/ENSG00000115457/ENSG00000160685/ENSG00000101144/ENSG00000103335…	CDH1/FOXA1/GATA3/EPCAM/LGALS3/SPINT2/PTPN6/ALOX15/SHH/LGALS1/CD44/CXCL12/ICAM1/CD9/ABAT/MBP/EGR3/XBP1/SDC4/KLF4/RARA/IGFBP2/ZBTB7B/BMP7/PIEZO1/WNT4/HFE/ZP3/BCL6/SOCS1/CELSR2/CORO1A/VTCN1/PIK3R1/EPHB3/DOCK8/HLA-DRB5/PODXL/EPB41L5/MAP3K8/FSTL3/CAV1/CCR7/ZMIZ1/PRKCD/DMTN/AKT1/CEBPB/CCL2/MYB/ASS1/CCL28/JAG1/HLA-DRB1/CITED2/GPNMB/CD47/IFNL1/TNFRSF21/IRF1/RASGRP1/HES1/MAP3K14/TRPV4/CD276/ADAM8/GRB2/MYA…	79
BP	GO:0002227	innate immune response in mucosa	9|2653	15|14725	0.00034559	0.017406	ENSG00000184678/ENSG00000273802/ENSG00000180596/ENSG00000125999/ENSG00000124635/ENSG00000197903/ENSG00000277224/ENSG00000274290/ENSG00000278588	HIST2H2BE/HIST1H2BG/HIST1H2BC/BPIFB1/HIST1H2BJ/HIST1H2BK/HIST1H2BF/HIST1H2BE/HIST1H2BI	9
BP	GO:0046596	regulation of viral entry into host cell	12|2653	24|14725	0.000358262	0.0178845	ENSG00000184012/ENSG00000142089/ENSG00000100097/ENSG00000148180/ENSG00000132256/ENSG00000130202/ENSG00000185201/ENSG00000121060/ENSG00000185885/ENSG00000171206/ENSG00000249853/ENSG00000185624	TMPRSS2/IFITM3/LGALS1/GSN/TRIM5/NECTIN2/IFITM2/TRIM25/IFITM1/TRIM8/HS3ST5/P4HB	12
BP	GO:0110053	regulation of actin filament organization	60|2653	219|14725	0.000363782	0.0180008	ENSG00000184292/ENSG00000124126/ENSG00000006747/ENSG00000161905/ENSG00000107562/ENSG00000090339/ENSG00000125968/ENSG00000205542/ENSG00000248905/ENSG00000124145/ENSG00000171522/ENSG00000099250/ENSG00000172830/ENSG00000146904/ENSG00000112902/ENSG00000171992/ENSG00000162552/ENSG00000102879/ENSG00000148180/ENSG00000050327/ENSG00000145675/ENSG00000090020/ENSG00000172403/ENSG00000125753/ENSG00000106526…	TACSTD2/PREX1/SCIN/ALOX15/CXCL12/ICAM1/ID1/TMSB4X/FMN1/SDC4/PTGER4/NRP1/SSH3/EPHA1/SEMA5A/SYNPO/WNT4/CORO1A/GSN/ARHGEF5/PIK3R1/SLC9A1/SYNPO2/VASP/ACTR3C/ARHGEF10L/CCR7/CORO1B/PRKCD/DMTN/TPM1/ARPC1B/PXN/WAS/TGFB3/WDR1/HCK/SMAD3/ARPC4/SPIRE2/CTTN/HIP1R/TESK1/ARHGAP35/CCL26/MYO1C/CFL1/VIL1/BRK1/S100A10/ARPC5L/TMOD3/LIMK1/GRB2/CYFIP1/MYADM/PYCARD/CAPG/WASL/NPHS1	60
BP	GO:0009914	hormone transport	72|2653	274|14725	0.000390097	0.0191351	ENSG00000107485/ENSG00000128564/ENSG00000163083/ENSG00000118640/ENSG00000119714/ENSG00000183044/ENSG00000011347/ENSG00000078401/ENSG00000169047/ENSG00000270885/ENSG00000170745/ENSG00000145103/ENSG00000173175/ENSG00000130529/ENSG00000125618/ENSG00000164850/ENSG00000072310/ENSG00000010704/ENSG00000176887/ENSG00000110090/ENSG00000003147/ENSG00000136830/ENSG00000117394/ENSG00000101187/ENSG00000123999…	GATA3/VGF/INHBB/VAMP8/GPR68/ABAT/SYT7/EDN1/IRS1/RASL10B/KCNS3/ILDR1/ADCY5/TRPM4/PAX8/GPER1/SREBF1/HFE/SOX11/CPT1A/ICA1/FAM129B/SLC2A1/SLCO4A1/INHA/ITPR3/FAM3B/PPP3CA/FFAR2/KISS1/SNX19/TFR2/GNAS/PTPRN2/MYB/HCAR2/ADRA2B/NOV/HLA-DRB1/STX1A/SLC25A6/SNAP25/PFKL/SMPD3/MAFA/LRP5/MIDN/AACS/PIM3/TTR/CRY2/ITPR1/PHPT1/LIF/NR1D1/TRPV4/CPLX1/ADRA2C/ARRB1/MYO5A/SSTR5/EXOC3L1/KCNJ11/INHBA/IL1RN/MYRIP/CACNA1D/IL…	72
BP	GO:0046879	hormone secretion	70|2653	265|14725	0.000397226	0.0193168	ENSG00000107485/ENSG00000128564/ENSG00000163083/ENSG00000118640/ENSG00000119714/ENSG00000183044/ENSG00000011347/ENSG00000078401/ENSG00000169047/ENSG00000270885/ENSG00000170745/ENSG00000145103/ENSG00000173175/ENSG00000130529/ENSG00000125618/ENSG00000164850/ENSG00000072310/ENSG00000010704/ENSG00000176887/ENSG00000110090/ENSG00000003147/ENSG00000136830/ENSG00000117394/ENSG00000123999/ENSG00000096433…	GATA3/VGF/INHBB/VAMP8/GPR68/ABAT/SYT7/EDN1/IRS1/RASL10B/KCNS3/ILDR1/ADCY5/TRPM4/PAX8/GPER1/SREBF1/HFE/SOX11/CPT1A/ICA1/FAM129B/SLC2A1/INHA/ITPR3/FAM3B/PPP3CA/FFAR2/KISS1/SNX19/TFR2/GNAS/PTPRN2/MYB/HCAR2/ADRA2B/NOV/HLA-DRB1/STX1A/SLC25A6/SNAP25/PFKL/SMPD3/MAFA/LRP5/MIDN/AACS/PIM3/CRY2/ITPR1/PHPT1/LIF/NR1D1/TRPV4/CPLX1/ADRA2C/ARRB1/MYO5A/SSTR5/EXOC3L1/KCNJ11/INHBA/IL1RN/MYRIP/CACNA1D/IL11/KDM5B/PER…	70
BP	GO:0016331	morphogenesis of embryonic epithelium	43|2653	145|14725	0.000401361	0.0193511	ENSG00000166145/ENSG00000149418/ENSG00000107485/ENSG00000188064/ENSG00000167642/ENSG00000158055/ENSG00000164690/ENSG00000101115/ENSG00000170561/ENSG00000165731/ENSG00000175707/ENSG00000124145/ENSG00000092969/ENSG00000131759/ENSG00000125618/ENSG00000101144/ENSG00000196576/ENSG00000162552/ENSG00000176887/ENSG00000073282/ENSG00000138771/ENSG00000168758/ENSG00000083307/ENSG00000169083/ENSG00000130702…	SPINT1/ST14/GATA3/WNT7B/SPINT2/GRHL3/SHH/SALL4/IRX2/RET/KDF1/SDC4/TGFB2/RARA/PAX8/BMP7/PLXNB2/WNT4/SOX11/TP63/SHROOM3/SEMA4C/GRHL2/AR/LAMA5/RARG/VASP/EPB41L5/ALDH1A3/TEAD2/COBL/FOLR1/TFAP2A/JAG2/OVOL2/CITED2/CELSR1/ARHGAP35/CFL1/IRX3/IFT122/DVL3/VEGFC	43
BP	GO:0002446	neutrophil mediated immunity	106|2653	434|14725	0.000415711	0.0198731	ENSG00000092929/ENSG00000131981/ENSG00000118640/ENSG00000103196/ENSG00000111679/ENSG00000026508/ENSG00000163220/ENSG00000163191/ENSG00000138772/ENSG00000081277/ENSG00000117984/ENSG00000173801/ENSG00000006534/ENSG00000176978/ENSG00000130303/ENSG00000163636/ENSG00000125730/ENSG00000178372/ENSG00000116260/ENSG00000148346/ENSG00000051523/ENSG00000147813/ENSG00000129353/ENSG00000172794/ENSG00000148180…	UNC13D/LGALS3/VAMP8/CRISPLD2/PTPN6/CD44/S100A9/S100A11/ANXA3/PKP1/CTSD/JUP/ALDH3B1/DPP7/BST2/PSMD6/C3/CALML5/QSOX1/LCN2/CYBA/NAPRT/SLC44A2/RAB37/GSN/LRG1/B4GALT1/ANXA2/FTH1/SLC11A1/CEACAM6/CTSA/NBEAL2/S100A8/S100P/RAB3D/HSPA6/PADI2/PRKCD/PDXK/TSPAN14/TMC6/ITGAM/MMP9/PTPRJ/CAPN1/GRN/CD63/MVP/PTPRN2/GALNS/TMEM173/IMPDH1/TLR2/WDR1/SNAP25/TCIRG1/ABR/PFKL/ALAD/ACAA1/CPPED1/CNN2/DNASE1/CD47/CRISP3/DOCK…	106
BP	GO:0034612	response to tumor necrosis factor	67|2653	252|14725	0.000430836	0.0204231	ENSG00000170421/ENSG00000137801/ENSG00000107485/ENSG00000111057/ENSG00000095261/ENSG00000006327/ENSG00000163347/ENSG00000090339/ENSG00000111321/ENSG00000205542/ENSG00000128016/ENSG00000078401/ENSG00000104689/ENSG00000168743/ENSG00000163636/ENSG00000100906/ENSG00000124635/ENSG00000051523/ENSG00000164850/ENSG00000215788/ENSG00000186891/ENSG00000163874/ENSG00000163349/ENSG00000140939/ENSG00000108443…	KRT8/THBS1/GATA3/KRT18/PSMD5/TNFRSF12A/CLDN1/ICAM1/LTBR/TMSB4X/ZFP36/EDN1/TNFRSF10A/NPNT/PSMD6/NFKBIA/HIST1H2BJ/CYBA/GPER1/TNFRSF25/TNFRSF18/ZC3H12A/HIPK1/NOL3/RPS6KB1/EDA2R/ZFP36L2/CXCL16/CARD14/PSMB10/ZFP36L1/TNFRSF1A/AKT1/CXCL8/CCL2/CCL22/CIB1/BIRC3/ASS1/PID1/RNF31/NGFR/TRADD/PSME1/TNFRSF11B/MADD/CCL20/PSMA7/SPPL2A/TNFRSF21/CCL26/SELE/PSMC5/MAP3K14/UBC/IKBKG/PSME2/TNFSF15/DAB2IP/KCNJ11/SHARPIN…	67
BP	GO:0032464	positive regulation of protein homooligomerization	7|2653	10|14725	0.000440408	0.0207028	ENSG00000100290/ENSG00000104081/ENSG00000120885/ENSG00000015475/ENSG00000155366/ENSG00000105327/ENSG00000177427	BIK/BMF/CLU/BID/RHOC/BBC3/MIEF2	7
BP	GO:0002790	peptide secretion	111|2653	459|14725	0.000456625	0.0212878	ENSG00000107485/ENSG00000128564/ENSG00000163083/ENSG00000119714/ENSG00000115267/ENSG00000073350/ENSG00000163220/ENSG00000205542/ENSG00000183044/ENSG00000167964/ENSG00000011347/ENSG00000134830/ENSG00000115221/ENSG00000197971/ENSG00000078401/ENSG00000100219/ENSG00000185386/ENSG00000169047/ENSG00000087085/ENSG00000270885/ENSG00000170745/ENSG00000145103/ENSG00000173175/ENSG00000171522/ENSG00000173267…	GATA3/VGF/INHBB/GPR68/IFIH1/LLGL2/S100A9/TMSB4X/ABAT/RAB26/SYT7/C5AR2/ITGB6/MBP/EDN1/XBP1/MAPK11/IRS1/ACHE/RASL10B/KCNS3/ILDR1/ADCY5/PTGER4/SNCG/TGFB2/TRPM4/PAX8/KCNN4/RHBDF1/GPER1/SREBF1/HFE/IDH2/VTCN1/CPT1A/RAB37/NOX5/ZC3H12A/ICA1/SLC2A1/S100A8/BANK1/ITPR3/CCR7/DMTN/FAM3B/PPP3CA/FFAR2/KISS1/SNX19/TFR2/RAB15/GNAS/NR1H2/IL17RC/PTPRN2/HCAR2/TGFB3/ABCA1/TRAF3IP2/FN1/TLR2/NOV/HLA-DRB1/STX1A/SLC25A6/…	111
BP	GO:0071356	cellular response to tumor necrosis factor	63|2653	235|14725	0.000496623	0.0229627	ENSG00000170421/ENSG00000137801/ENSG00000107485/ENSG00000111057/ENSG00000095261/ENSG00000006327/ENSG00000163347/ENSG00000090339/ENSG00000111321/ENSG00000205542/ENSG00000128016/ENSG00000078401/ENSG00000104689/ENSG00000168743/ENSG00000163636/ENSG00000100906/ENSG00000124635/ENSG00000051523/ENSG00000164850/ENSG00000215788/ENSG00000186891/ENSG00000163874/ENSG00000163349/ENSG00000140939/ENSG00000131080…	KRT8/THBS1/GATA3/KRT18/PSMD5/TNFRSF12A/CLDN1/ICAM1/LTBR/TMSB4X/ZFP36/EDN1/TNFRSF10A/NPNT/PSMD6/NFKBIA/HIST1H2BJ/CYBA/GPER1/TNFRSF25/TNFRSF18/ZC3H12A/HIPK1/NOL3/EDA2R/ZFP36L2/CARD14/PSMB10/ZFP36L1/TNFRSF1A/AKT1/CXCL8/CCL2/CCL22/CIB1/BIRC3/ASS1/PID1/RNF31/NGFR/TRADD/PSME1/TNFRSF11B/MADD/CCL20/PSMA7/SPPL2A/TNFRSF21/CCL26/PSMC5/MAP3K14/UBC/IKBKG/PSME2/TNFSF15/DAB2IP/KCNJ11/SHARPIN/PSMD4/PYCARD/CASP4/…	63
BP	GO:0061180	mammary gland epithelium development	24|2653	68|14725	0.000509649	0.0233734	ENSG00000091831/ENSG00000107485/ENSG00000188064/ENSG00000064270/ENSG00000117595/ENSG00000178568/ENSG00000170430/ENSG00000082175/ENSG00000110092/ENSG00000135374/ENSG00000162552/ENSG00000169083/ENSG00000142208/ENSG00000172216/ENSG00000244405/ENSG00000109321/ENSG00000111424/ENSG00000120149/ENSG00000142627/ENSG00000135439/ENSG00000162337/ENSG00000117139/ENSG00000105221/ENSG00000204580	ESR1/GATA3/WNT7B/ATP2C2/IRF6/ERBB4/MGMT/PGR/CCND1/ELF5/WNT4/AR/AKT1/CEBPB/ETV5/AREG/VDR/MSX2/EPHA2/AGAP2/LRP5/KDM5B/AKT2/DDR1	24
BP	GO:0051493	regulation of cytoskeleton organization	108|2653	446|14725	0.000514433	0.0234025	ENSG00000184292/ENSG00000124126/ENSG00000006747/ENSG00000145632/ENSG00000158055/ENSG00000161905/ENSG00000141376/ENSG00000107562/ENSG00000090339/ENSG00000163220/ENSG00000125968/ENSG00000205542/ENSG00000173156/ENSG00000164050/ENSG00000142632/ENSG00000078401/ENSG00000248905/ENSG00000130303/ENSG00000124145/ENSG00000171522/ENSG00000129682/ENSG00000108395/ENSG00000099250/ENSG00000172830/ENSG00000146904…	TACSTD2/PREX1/SCIN/PLK2/GRHL3/ALOX15/BCAS3/CXCL12/ICAM1/S100A9/ID1/TMSB4X/RHOD/PLXNB1/ARHGEF19/EDN1/FMN1/BST2/SDC4/PTGER4/FGF13/TRIM37/NRP1/SSH3/EPHA1/MAP2/SIGLEC15/SEMA5A/SYNPO/WNT4/CORO1A/GSN/ARHGEF5/PIK3R1/SLC9A1/SYNPO2/ESPN/PDGFA/VASP/ACTR3C/ATF5/S100A8/ARHGEF10L/CCR7/CORO1B/PRKCD/DMTN/TPM1/ARPC1B/PXN/F11R/WAS/TGFB3/RASSF7/C16orf45/CIB1/CDKN1B/WDR1/HCK/SMAD3/ARPC4/SPIRE2/PLXNA3/CHMP1A/CDK10/C…	108
BP	GO:0007044	cell-substrate junction assembly	28|2653	84|14725	0.000531206	0.0239723	ENSG00000137801/ENSG00000132470/ENSG00000189058/ENSG00000141376/ENSG00000196878/ENSG00000173156/ENSG00000248905/ENSG00000124145/ENSG00000099250/ENSG00000178209/ENSG00000162552/ENSG00000090020/ENSG00000130702/ENSG00000115109/ENSG00000158856/ENSG00000149177/ENSG00000115414/ENSG00000087077/ENSG00000166949/ENSG00000152894/ENSG00000058085/ENSG00000085733/ENSG00000076826/ENSG00000072110/ENSG00000112715…	THBS1/ITGB4/APOD/BCAS3/LAMB3/RHOD/FMN1/SDC4/NRP1/PLEC/WNT4/SLC9A1/LAMA5/EPB41L5/DMTN/PTPRJ/FN1/TRIP6/SMAD3/PTPRK/LAMC2/CTTN/CAMSAP3/ACTN1/VEGFA/S100A10/COL16A1/CD151	28
BP	GO:0030099	myeloid cell differentiation	89|2653	357|14725	0.000583986	0.026145	ENSG00000137801/ENSG00000107485/ENSG00000129993/ENSG00000178467/ENSG00000006747/ENSG00000131981/ENSG00000111679/ENSG00000119714/ENSG00000278828/ENSG00000187608/ENSG00000116016/ENSG00000171223/ENSG00000198125/ENSG00000111321/ENSG00000158406/ENSG00000100867/ENSG00000128016/ENSG00000156127/ENSG00000160211/ENSG00000273983/ENSG00000159216/ENSG00000170345/ENSG00000100906/ENSG00000131759/ENSG00000180694…	THBS1/GATA3/CBFA2T3/P4HTM/SCIN/LGALS3/PTPN6/GPR68/HIST1H3H/ISG15/EPAS1/JUNB/MB/LTBR/HIST1H4H/DHRS2/ZFP36/BATF/G6PD/HIST1H3G/RUNX1/FOS/NFKBIA/RARA/TMEM64/SIGLEC15/ZNF385A/BCL6/KLF10/ZFPM1/PIK3R1/HIST4H4/RARG/ANXA2/GAB2/RELB/NBEAL2/INHA/FSTL3/FAM20C/CCR7/ZFP36L1/DMTN/EFNA4/CEBPB/IL20/MMP9/PRMT6/HIST1H3B/GNAS/MYH9/HIST2H3D/TLR2/CIB1/WDR1/JAG1/EPHA2/HIST1H4K/LEO1/CITED2/HIST2H4B/H3F3B/SBNO2/HIST1H3A/…	89
BP	GO:0090280	positive regulation of calcium ion import	8|2653	13|14725	0.000596037	0.0264744	ENSG00000100311/ENSG00000131981/ENSG00000064270/ENSG00000159167/ENSG00000107562/ENSG00000122679/ENSG00000108691/ENSG00000167723	PDGFB/LGALS3/ATP2C2/STC1/CXCL12/RAMP3/CCL2/TRPV3	8
BP	GO:0019730	antimicrobial humoral response	22|2653	61|14725	0.00061283	0.0270076	ENSG00000184678/ENSG00000069399/ENSG00000273802/ENSG00000163220/ENSG00000180596/ENSG00000125999/ENSG00000124635/ENSG00000148346/ENSG00000197903/ENSG00000078898/ENSG00000161031/ENSG00000277224/ENSG00000018280/ENSG00000143546/ENSG00000120885/ENSG00000106538/ENSG00000131050/ENSG00000274290/ENSG00000177556/ENSG00000278588/ENSG00000156482/ENSG00000163218	HIST2H2BE/BCL3/HIST1H2BG/S100A9/HIST1H2BC/BPIFB1/HIST1H2BJ/LCN2/HIST1H2BK/BPIFB2/PGLYRP2/HIST1H2BF/SLC11A1/S100A8/CLU/RARRES2/BPIFA2/HIST1H2BE/ATOX1/HIST1H2BI/RPL30/PGLYRP4	22
BP	GO:0043087	regulation of GTPase activity	106|2653	439|14725	0.000642611	0.0278844	ENSG00000155066/ENSG00000124126/ENSG00000158055/ENSG00000198753/ENSG00000141376/ENSG00000073350/ENSG00000138835/ENSG00000090339/ENSG00000127084/ENSG00000130762/ENSG00000164050/ENSG00000142632/ENSG00000111490/ENSG00000008323/ENSG00000188157/ENSG00000099250/ENSG00000146904/ENSG00000095383/ENSG00000143333/ENSG00000196576/ENSG00000162552/ENSG00000113916/ENSG00000089820/ENSG00000135905/ENSG00000111344…	PROM2/PREX1/GRHL3/PLXNB3/BCAS3/LLGL2/RGS3/ICAM1/FGD3/ARHGEF16/PLXNB1/ARHGEF19/TBC1D30/PLEKHG6/AGRN/NRP1/EPHA1/TBC1D2/RGS16/PLXNB2/WNT4/BCL6/ARHGAP4/DOCK10/RASAL1/ARHGEF5/RGS6/RGL3/TBC1D9/EPHB3/DOCK8/RAP1GAP/ARHGEF10L/PLXND1/GNB5/CCR7/ALS2CL/SRGAP1/TRAPPC6A/FICD/CCL2/ARHGEF37/RABEP2/GNAS/F11R/PTPRN2/RASA3/CCL22/RGS11/VAV2/EPHA2/AGAP2/ABR/PRR5-ARHGAP8/ACAP3/ARHGAP1/TBC1D17/MTSS1L/ASAP2/SH3BP4/TBC1D…	106
BP	GO:0043410	positive regulation of MAPK cascade	106|2653	439|14725	0.000642611	0.0278844	ENSG00000137801/ENSG00000144476/ENSG00000188064/ENSG00000107984/ENSG00000146674/ENSG00000100311/ENSG00000141753/ENSG00000172936/ENSG00000170775/ENSG00000124493/ENSG00000161905/ENSG00000026508/ENSG00000163235/ENSG00000090339/ENSG00000169242/ENSG00000111321/ENSG00000170075/ENSG00000178568/ENSG00000134830/ENSG00000078401/ENSG00000185386/ENSG00000168743/ENSG00000092969/ENSG00000099250/ENSG00000099860…	THBS1/ACKR3/WNT7B/DKK1/IGFBP3/PDGFB/IGFBP4/MYD88/GPR37/GRM4/ALOX15/CD44/TGFA/ICAM1/EFNA1/LTBR/GPR37L1/ERBB4/C5AR2/EDN1/MAPK11/NPNT/TGFB2/NRP1/GADD45B/TPD52L1/GPER1/GADD45G/RAMP3/SEMA4C/ARHGEF5/ZC3H12A/AR/NRK/EDA2R/PDGFA/TRIM5/BANK1/MAP3K8/AVPI1/CXCR4/CCR7/KISS1/MAPKAPK2/CCL2/CARD9/ADRA2B/TGFB3/TRAF4/CCL22/CIB1/MST1R/CDK10/GNAI2/NDRG4/TRAF7/GPNMB/MADD/CCL20/TAOK3/WWC1/NPY5R/NOTCH1/CCL26/LAMTOR1/AR…	106
BP	GO:0042058	regulation of epidermal growth factor receptor signaling pathway	27|2653	81|14725	0.000662464	0.0281118	ENSG00000013588/ENSG00000106541/ENSG00000101213/ENSG00000163235/ENSG00000007384/ENSG00000140945/ENSG00000164850/ENSG00000142208/ENSG00000100985/ENSG00000149177/ENSG00000274286/ENSG00000159733/ENSG00000130787/ENSG00000142273/ENSG00000169129/ENSG00000129667/ENSG00000184160/ENSG00000138798/ENSG00000150991/ENSG00000177885/ENSG00000136848/ENSG00000197114/ENSG00000127527/ENSG00000160691/ENSG00000265491…	GPRC5A/AGR2/PTK6/TGFA/RHBDF1/CDH13/GPER1/AKT1/MMP9/PTPRJ/ADRA2B/ZFYVE28/HIP1R/CBLC/AFAP1L2/RHBDF2/ADRA2C/EGF/UBC/GRB2/DAB2IP/ZGPAT/EPS15L1/SHC1/RNF115/SHKBP1/PTPN3	27
BP	GO:0002764	immune response-regulating signaling pathway	103|2653	425|14725	0.000664384	0.0281118	ENSG00000091831/ENSG00000107485/ENSG00000189334/ENSG00000095261/ENSG00000131981/ENSG00000172936/ENSG00000111679/ENSG00000115267/ENSG00000117983/ENSG00000263528/ENSG00000163220/ENSG00000134830/ENSG00000101096/ENSG00000159216/ENSG00000172551/ENSG00000163636/ENSG00000170345/ENSG00000100906/ENSG00000125999/ENSG00000104783/ENSG00000051523/ENSG00000161031/ENSG00000172243/ENSG00000145675/ENSG00000163874…	ESR1/GATA3/S100A14/PSMD5/LGALS3/MYD88/PTPN6/IFIH1/MUC5B/IKBKE/S100A9/C5AR2/NFATC2/RUNX1/MUCL1/PSMD6/FOS/NFKBIA/BPIFB1/KCNN4/CYBA/PGLYRP2/CLEC7A/PIK3R1/ZC3H12A/TRIL/HLA-DRB5/MUC1/GAB2/TRIM5/RELB/S100A8/PSMB10/MUC3A/CAV1/CCR7/PRKCD/PPP3CA/NECTIN2/FFAR2/ITGAM/ARPC1B/PTPRJ/MAPKAPK2/CARD9/WAS/TLR2/BIRC3/VAV2/PAX5/HCK/TICAM1/RNF31/HLA-DRB1/ARPC4/RFTN1/CNPY3/UNC93B1/PSME1/BCAR1/PSMA7/PRKCH/TNFRSF21/MYO1…	103
BP	GO:0033561	regulation of water loss via skin	10|2653	19|14725	0.000667785	0.0281118	ENSG00000189143/ENSG00000175793/ENSG00000158055/ENSG00000163347/ENSG00000144452/ENSG00000175707/ENSG00000134317/ENSG00000073282/ENSG00000186832/ENSG00000163472	CLDN4/SFN/GRHL3/CLDN1/ABCA12/KDF1/GRHL1/TP63/KRT16/TMEM79	10
BP	GO:0060713	labyrinthine layer morphogenesis	10|2653	19|14725	0.000667785	0.0281118	ENSG00000166145/ENSG00000149418/ENSG00000188064/ENSG00000167642/ENSG00000184557/ENSG00000101144/ENSG00000083307/ENSG00000185650/ENSG00000177885/ENSG00000163251	SPINT1/ST14/WNT7B/SPINT2/SOCS3/BMP7/GRHL2/ZFP36L1/GRB2/FZD5	10
BP	GO:0009615	response to virus	68|2653	261|14725	0.000716361	0.0299333	ENSG00000107485/ENSG00000169871/ENSG00000092929/ENSG00000069399/ENSG00000172936/ENSG00000142089/ENSG00000115267/ENSG00000187608/ENSG00000107562/ENSG00000263528/ENSG00000157601/ENSG00000111331/ENSG00000166801/ENSG00000106211/ENSG00000128604/ENSG00000138496/ENSG00000135114/ENSG00000185386/ENSG00000130303/ENSG00000163840/ENSG00000111335/ENSG00000164430/ENSG00000163874/ENSG00000140465/ENSG00000089127…	GATA3/TRIM56/UNC13D/BCL3/MYD88/IFITM3/IFIH1/ISG15/CXCL12/IKBKE/MX1/OAS3/FAM111A/HSPB1/IRF5/PARP9/OASL/MAPK11/BST2/DTX3L/OAS2/CGAS/ZC3H12A/CYP1A1/OAS1/AP1S1/TRIM5/ISG20/CLU/APOBEC3B/CXCR4/IFIT2/IFITM2/LAMTOR5/CARD9/IRF2/C19orf66/TRIM25/DDIT4/TMEM173/CCL22/TRAF3IP2/IFITM1/BIRC3/MST1R/TICAM1/ZMYND11/IFIT3/UNC93B1/ABCF3/BCL2L1/FOSL1/IFNL1/CFL1/IRF1/RSAD2/SERINC5/MAP3K14/MX2/IKBKG/EXOSC4/IL27/IRF3/TAR…	68
BP	GO:0006869	lipid transport	74|2653	289|14725	0.000734377	0.0304605	ENSG00000137801/ENSG00000081923/ENSG00000108846/ENSG00000185101/ENSG00000189058/ENSG00000164690/ENSG00000160179/ENSG00000214530/ENSG00000144452/ENSG00000176463/ENSG00000011347/ENSG00000182107/ENSG00000168398/ENSG00000078401/ENSG00000118777/ENSG00000101188/ENSG00000100906/ENSG00000168907/ENSG00000104783/ENSG00000153246/ENSG00000167972/ENSG00000186350/ENSG00000006025/ENSG00000187134/ENSG00000110090…	THBS1/ATP8B1/ABCC3/ANO9/APOD/SHH/ABCG1/STARD10/ABCA12/SLCO3A1/SYT7/TMEM30B/BDKRB2/EDN1/ABCG2/NTSR1/NFKBIA/PLA2G4F/KCNN4/PLA2R1/ABCA3/RXRA/OSBPL7/AKR1C1/CPT1A/ATP9A/ANXA2/ABCA2/PLA2G3/LRP10/ESYT3/CLU/CAV1/PITPNC1/PRKCD/AKT1/SOAT2/SLC10A3/OSBPL10/STRA6/LDLR/NR1H2/MYB/ABCA1/APOBR/APOL6/SERPINA5/ABCA4/GLTPD2/DISP3/P2RX4/ABCD1/CRY2/LAMTOR1/TEX2/PLIN2/EGF/VPS51/VLDLR/OSBPL2/INHBA/APOL3/SPNS2/KDM5B/PITP…	74
BP	GO:0048863	stem cell differentiation	64|2653	243|14725	0.000747203	0.0307662	ENSG00000091831/ENSG00000184292/ENSG00000129514/ENSG00000107485/ENSG00000119888/ENSG00000095261/ENSG00000164690/ENSG00000278828/ENSG00000121068/ENSG00000124813/ENSG00000001617/ENSG00000158406/ENSG00000156127/ENSG00000178568/ENSG00000165731/ENSG00000078401/ENSG00000273983/ENSG00000159216/ENSG00000163636/ENSG00000075223/ENSG00000092969/ENSG00000099250/ENSG00000101144/ENSG00000139352/ENSG00000176887…	ESR1/TACSTD2/FOXA1/GATA3/EPCAM/PSMD5/SHH/HIST1H3H/TBX2/RUNX2/SEMA3F/HIST1H4H/BATF/ERBB4/RET/EDN1/HIST1H3G/RUNX1/PSMD6/SEMA3C/TGFB2/NRP1/BMP7/ASCL1/SOX11/TP63/HIST4H4/LAMA5/ZFP36L2/PSMB10/TEAD2/MSX2/HIST1H3B/MYB/HIST2H3D/FOLR1/JAG1/HIST1H4K/OVOL2/CITED2/HIST2H4B/H3F3B/PSME1/HIST1H3A/PSMA7/NOTCH1/PDCD6/LTBP3/CFL1/PSMC5/LIF/HES1/HIST1H3E/UBC/PSME2/HIST1H4I/PSMD4/TCF3/ELL3/MAPK3/JARID2/HIST2H4A/PSMB4…	64
BP	GO:2000027	regulation of organ morphogenesis	62|2653	234|14725	0.000759804	0.0310584	ENSG00000091831/ENSG00000184292/ENSG00000107485/ENSG00000107984/ENSG00000095261/ENSG00000176788/ENSG00000158055/ENSG00000164690/ENSG00000121068/ENSG00000124813/ENSG00000196562/ENSG00000142632/ENSG00000078401/ENSG00000100219/ENSG00000102981/ENSG00000163637/ENSG00000163636/ENSG00000075223/ENSG00000092969/ENSG00000125618/ENSG00000101144/ENSG00000162552/ENSG00000186350/ENSG00000143126/ENSG00000189120…	ESR1/TACSTD2/GATA3/DKK1/PSMD5/BASP1/GRHL3/SHH/TBX2/RUNX2/SULF2/ARHGEF19/EDN1/XBP1/PARD6A/PRICKLE2/PSMD6/SEMA3C/TGFB2/PAX8/BMP7/WNT4/RXRA/CELSR2/SP6/NTN4/AR/AJAP1/AMTN/B4GALT1/PDGFA/SAPCD2/PSMB10/HPN/ETV5/VDR/TFAP2A/CELSR3/CITED2/PSME1/TNFRSF11B/POR/PSMA7/CELSR1/MESP1/NOTCH1/PSMC5/VEGFA/AP2M1/LIF/HES1/AP2S1/UBC/PSME2/PSMD4/DAAM1/VANGL1/CLTC/DVL3/SMURF1/FZD5/PSMB4	62
BP	GO:0008593	regulation of Notch signaling pathway	28|2653	86|14725	0.00081038	0.0328874	ENSG00000163435/ENSG00000106003/ENSG00000092969/ENSG00000100906/ENSG00000197070/ENSG00000101144/ENSG00000139352/ENSG00000113916/ENSG00000073282/ENSG00000181830/ENSG00000136830/ENSG00000128965/ENSG00000108175/ENSG00000074181/ENSG00000108219/ENSG00000172889/ENSG00000198373/ENSG00000136999/ENSG00000101384/ENSG00000184916/ENSG00000166823/ENSG00000148400/ENSG00000176907/ENSG00000114315/ENSG00000137486…	ELF3/LFNG/TGFB2/NFKBIA/ARRDC1/BMP7/ASCL1/BCL6/TP63/SLC35C1/FAM129B/CHAC1/ZMIZ1/NOTCH3/TSPAN14/EGFL7/WWP2/NOV/JAG1/JAG2/MESP1/NOTCH1/TCIM/HES1/ARRB1/EGF/UBC/DLL4	28
BP	GO:0044057	regulation of system process	106|2653	442|14725	0.000827424	0.0333393	ENSG00000075461/ENSG00000089356/ENSG00000099337/ENSG00000100311/ENSG00000124249/ENSG00000163083/ENSG00000159167/ENSG00000074370/ENSG00000121068/ENSG00000116016/ENSG00000090339/ENSG00000183044/ENSG00000109062/ENSG00000050628/ENSG00000160211/ENSG00000168398/ENSG00000074416/ENSG00000173801/ENSG00000162989/ENSG00000055118/ENSG00000078401/ENSG00000168743/ENSG00000101188/ENSG00000136826/ENSG00000129682…	CACNG4/FXYD3/KCNK6/PDGFB/KCNK15/INHBB/STC1/ATP2A3/TBX2/EPAS1/ICAM1/ABAT/SLC9A3R1/PTGER3/G6PD/BDKRB2/MGLL/JUP/KCNJ3/KCNH2/EDN1/NPNT/NTSR1/KLF4/FGF13/CACNA1H/TGFB2/TRPM4/TENM4/CHRM1/RNLS/CACNB3/CYBA/GPER1/SREBF1/MAG/IGFBP5/LMNA/ZC3H12A/SLC9A1/NOL3/RPS6KB1/TH/EMP2/SMTN/SCN1B/TNNI1/EDN2/ATP1B1/INHA/CAMK2B/CAV1/ITPR3/AKT1/PPP3CA/KCNN2/TPM1/FLNA/KISS1/GNAS/NR1H2/HCAR2/ADRA2B/COMT/IRX5/NOV/KCNK1/SMAD3/K…	106
BP	GO:0050673	epithelial cell proliferation	85|2653	342|14725	0.000846539	0.0338676	ENSG00000137801/ENSG00000091831/ENSG00000103067/ENSG00000184292/ENSG00000107485/ENSG00000062038/ENSG00000146674/ENSG00000175793/ENSG00000100311/ENSG00000141753/ENSG00000164690/ENSG00000140832/ENSG00000198753/ENSG00000117595/ENSG00000107562/ENSG00000163235/ENSG00000196562/ENSG00000125968/ENSG00000134830/ENSG00000175707/ENSG00000082175/ENSG00000179388/ENSG00000100219/ENSG00000092969/ENSG00000099250…	THBS1/ESR1/ESRP2/TACSTD2/GATA3/CDH3/IGFBP3/SFN/PDGFB/IGFBP4/SHH/MARVELD3/PLXNB3/IRF6/CXCL12/TGFA/SULF2/ID1/C5AR2/KDF1/PGR/EGR3/XBP1/TGFB2/NRP1/SEMA5A/CCND1/ATOH8/CYBA/CDH13/SOX11/EHF/TP63/IGFBP5/NOX5/AR/LRG1/B4GALT1/OSR2/STAT5A/RAP1GAP/CAV1/ZFP36L1/AKT1/CEBPB/HPN/AREG/EGFL7/VDR/SDR16C5/SLURP1/CDKN1B/NOV/EPHA2/AGAP2/SMAD3/BCL11B/OVOL2/PTPRK/NGFR/NR2F2/SERPINB5/KRT4/NOTCH1/CCL26/CDKN2B/PDCD6/FOXN1/…	85
BP	GO:0035023	regulation of Rho protein signal transduction	37|2653	124|14725	0.000866598	0.0343983	ENSG00000205336/ENSG00000124126/ENSG00000177106/ENSG00000168542/ENSG00000127084/ENSG00000131037/ENSG00000130762/ENSG00000142632/ENSG00000005884/ENSG00000008323/ENSG00000099250/ENSG00000113916/ENSG00000182957/ENSG00000050327/novel.697/ENSG00000074964/ENSG00000183111/ENSG00000165029/novel.699/ENSG00000160293/ENSG00000171680/ENSG00000214944/ENSG00000110237/ENSG00000126217/ENSG00000159842/ENSG0000016…	ADGRG1/PREX1/EPS8L2/COL3A1/FGD3/EPS8L1/ARHGEF16/ARHGEF19/ITGA3/PLEKHG6/NRP1/BCL6/SPATA13/ARHGEF5/-/ARHGEF10L/ARHGEF37/ABCA1/-/VAV2/PLEKHG5/ARHGEF28/ARHGEF17/MCF2L/ABR/ARHGAP35/-/-/ARRB1/RTN4R/ARHGDIB/FGD4/VAV3/OPHN1/ARHGEF1/ARHGEF38/VAV1	37
BP	GO:0043299	leukocyte degranulation	110|2653	462|14725	0.000875644	0.0343983	ENSG00000092929/ENSG00000131981/ENSG00000118640/ENSG00000103196/ENSG00000111679/ENSG00000026508/ENSG00000163220/ENSG00000163191/ENSG00000138772/ENSG00000081277/ENSG00000117984/ENSG00000173801/ENSG00000006534/ENSG00000176978/ENSG00000130303/ENSG00000163636/ENSG00000125730/ENSG00000178372/ENSG00000116260/ENSG00000148346/ENSG00000051523/ENSG00000147813/ENSG00000102879/ENSG00000129353/ENSG00000172794…	UNC13D/LGALS3/VAMP8/CRISPLD2/PTPN6/CD44/S100A9/S100A11/ANXA3/PKP1/CTSD/JUP/ALDH3B1/DPP7/BST2/PSMD6/C3/CALML5/QSOX1/LCN2/CYBA/NAPRT/CORO1A/SLC44A2/RAB37/GSN/LRG1/B4GALT1/ANXA2/FTH1/PLA2G3/GAB2/SLC11A1/CEACAM6/CTSA/NBEAL2/S100A8/S100P/RAB3D/HSPA6/PADI2/PRKCD/PDXK/TSPAN14/TMC6/ITGAM/MMP9/PTPRJ/CAPN1/GRN/CD63/MVP/PTPRN2/GALNS/TMEM173/IMPDH1/TLR2/HCK/SNAP25/TCIRG1/ABR/PFKL/ALAD/ACAA1/CPPED1/CNN2/CD47/…	110
BP	GO:0060627	regulation of vesicle-mediated transport	105|2653	438|14725	0.000885695	0.0343983	ENSG00000155066/ENSG00000132698/ENSG00000107984/ENSG00000173227/ENSG00000092929/ENSG00000131981/ENSG00000118640/ENSG00000161905/ENSG00000142765/ENSG00000073350/ENSG00000124507/ENSG00000167964/ENSG00000011347/ENSG00000124839/ENSG00000111490/ENSG00000041353/ENSG00000124145/ENSG00000196557/ENSG00000099250/ENSG00000117472/ENSG00000125730/ENSG00000115884/ENSG00000095383/ENSG00000110975/ENSG00000051523…	PROM2/RAB25/DKK1/SYT12/UNC13D/LGALS3/VAMP8/ALOX15/SYTL1/LLGL2/PACSIN1/RAB26/SYT7/RAB17/TBC1D30/RAB27B/SDC4/CACNA1H/NRP1/TSPAN1/C3/SDC1/TBC1D2/SYT10/CYBA/CDH13/HFE/RAB20/ZP3/CNIH2/CORO1A/RAB37/TBC1D9/SYT8/ANXA2/GAB2/SLC11A1/TULP1/CLU/RAB3D/CAV1/PPP3CA/ITGAM/CBARP/CACNA1I/CD63/CCL2/TFR2/LDLR/RAB15/NR1H2/TLR2/HCK/STX1A/ABR/NDRG4/ARHGAP1/TBC1D17/SMPD3/LRSAM1/SCAMP5/HIP1R/CNN2/TBC1D10A/CD47/DOCK2/STX1…	105
BP	GO:0002275	myeloid cell activation involved in immune response	111|2653	467|14725	0.00088709	0.0343983	ENSG00000092929/ENSG00000131981/ENSG00000118640/ENSG00000103196/ENSG00000111679/ENSG00000026508/ENSG00000163220/ENSG00000163191/ENSG00000138772/ENSG00000081277/ENSG00000117984/ENSG00000173801/ENSG00000006534/ENSG00000176978/ENSG00000130303/ENSG00000163636/ENSG00000125730/ENSG00000178372/ENSG00000116260/ENSG00000148346/ENSG00000051523/ENSG00000147813/ENSG00000129353/ENSG00000172794/ENSG00000148180…	UNC13D/LGALS3/VAMP8/CRISPLD2/PTPN6/CD44/S100A9/S100A11/ANXA3/PKP1/CTSD/JUP/ALDH3B1/DPP7/BST2/PSMD6/C3/CALML5/QSOX1/LCN2/CYBA/NAPRT/SLC44A2/RAB37/GSN/LRG1/B4GALT1/ANXA2/FTH1/PLA2G3/GAB2/SLC11A1/CEACAM6/CTSA/NBEAL2/S100A8/S100P/RAB3D/HSPA6/PADI2/PRKCD/PDXK/TSPAN14/TMC6/ITGAM/MMP9/PTPRJ/CAPN1/GRN/CD63/MVP/PTPRN2/GALNS/TMEM173/IMPDH1/TLR2/TICAM1/SNAP25/TCIRG1/ABR/PFKL/ALAD/SBNO2/ACAA1/CPPED1/CNN2/DNA…	111
BP	GO:0060706	cell differentiation involved in embryonic placenta development	12|2653	26|14725	0.000896393	0.0343983	ENSG00000171345/ENSG00000170421/ENSG00000149418/ENSG00000167642/ENSG00000184557/ENSG00000183734/ENSG00000083307/ENSG00000142208/ENSG00000185551/ENSG00000128342/ENSG00000124216/ENSG00000163251	KRT19/KRT8/ST14/SPINT2/SOCS3/ASCL2/GRHL2/AKT1/NR2F2/LIF/SNAI1/FZD5	12
BP	GO:0071526	semaphorin-plexin signaling pathway	12|2653	26|14725	0.000896393	0.0343983	ENSG00000198753/ENSG00000001617/ENSG00000164050/ENSG00000075223/ENSG00000099250/ENSG00000196576/ENSG00000196189/ENSG00000168758/ENSG00000004399/ENSG00000196924/ENSG00000130827/ENSG00000221866	PLXNB3/SEMA3F/PLXNB1/SEMA3C/NRP1/PLXNB2/SEMA4A/SEMA4C/PLXND1/FLNA/PLXNA3/PLXNA4	12
BP	GO:0045746	negative regulation of Notch signaling pathway	16|2653	40|14725	0.00092336	0.0351937	ENSG00000106003/ENSG00000100906/ENSG00000197070/ENSG00000101144/ENSG00000113916/ENSG00000181830/ENSG00000136830/ENSG00000128965/ENSG00000074181/ENSG00000172889/ENSG00000198373/ENSG00000176907/ENSG00000137486/ENSG00000138798/ENSG00000150991/ENSG00000128917	LFNG/NFKBIA/ARRDC1/BMP7/BCL6/SLC35C1/FAM129B/CHAC1/NOTCH3/EGFL7/WWP2/TCIM/ARRB1/EGF/UBC/DLL4	16
BP	GO:0002385	mucosal immune response	11|2653	23|14725	0.00101628	0.0376921	ENSG00000184678/ENSG00000273802/ENSG00000124839/ENSG00000180596/ENSG00000125999/ENSG00000124635/ENSG00000197903/ENSG00000277224/ENSG00000126262/ENSG00000274290/ENSG00000278588	HIST2H2BE/HIST1H2BG/RAB17/HIST1H2BC/BPIFB1/HIST1H2BJ/HIST1H2BK/HIST1H2BF/FFAR2/HIST1H2BE/HIST1H2BI	11
BP	GO:0045606	positive regulation of epidermal cell differentiation	11|2653	23|14725	0.00101628	0.0376921	ENSG00000175793/ENSG00000088002/ENSG00000124151/ENSG00000175707/ENSG00000162891/ENSG00000111424/ENSG00000125850/ENSG00000137497/ENSG00000027075/ENSG00000148400/ENSG00000221926	SFN/SULT2B1/NCOA3/KDF1/IL20/VDR/OVOL2/NUMA1/PRKCH/NOTCH1/TRIM16	11
BP	GO:0051125	regulation of actin nucleation	11|2653	23|14725	0.00101628	0.0376921	ENSG00000006747/ENSG00000248905/ENSG00000102879/ENSG00000148180/ENSG00000172725/ENSG00000015285/ENSG00000130787/ENSG00000127831/ENSG00000254999/ENSG00000273749/ENSG00000106299	SCIN/FMN1/CORO1A/GSN/CORO1B/WAS/HIP1R/VIL1/BRK1/CYFIP1/WASL	11
BP	GO:0051127	positive regulation of actin nucleation	7|2653	11|14725	0.00102232	0.0376921	ENSG00000006747/ENSG00000248905/ENSG00000148180/ENSG00000015285/ENSG00000254999/ENSG00000273749/ENSG00000106299	SCIN/FMN1/GSN/WAS/BRK1/CYFIP1/WASL	7
BP	GO:0060670	branching involved in labyrinthine layer morphogenesis	7|2653	11|14725	0.00102232	0.0376921	ENSG00000166145/ENSG00000149418/ENSG00000167642/ENSG00000184557/ENSG00000083307/ENSG00000177885/ENSG00000163251	SPINT1/ST14/SPINT2/SOCS3/GRHL2/GRB2/FZD5	7
BP	GO:0030100	regulation of endocytosis	55|2653	205|14725	0.00106936	0.0391705	ENSG00000155066/ENSG00000107984/ENSG00000131981/ENSG00000161905/ENSG00000124507/ENSG00000011347/ENSG00000124839/ENSG00000117472/ENSG00000125730/ENSG00000051523/ENSG00000140945/ENSG00000010704/ENSG00000139832/ENSG00000182718/ENSG00000018280/ENSG00000112041/ENSG00000120885/ENSG00000105974/ENSG00000138814/ENSG00000135404/ENSG00000108691/ENSG00000106327/ENSG00000130164/ENSG00000131408/ENSG00000137462…	PROM2/DKK1/LGALS3/ALOX15/PACSIN1/SYT7/RAB17/TSPAN1/C3/CYBA/CDH13/HFE/RAB20/ANXA2/SLC11A1/TULP1/CLU/CAV1/PPP3CA/CD63/CCL2/TFR2/LDLR/NR1H2/TLR2/HCK/ABR/LRSAM1/SCAMP5/HIP1R/CNN2/CD47/DOCK2/STX1B/SELE/VEGFA/RAB5B/AP2M1/AP2S1/STON2/ARRB1/EGF/PACSIN3/NEDD4L/VPS28/TBC1D5/CD151/PTPN1/OPHN1/TNK2/SCARB1/PYCARD/ARFGAP1/SERPINE1/WASL	55
BP	GO:0002757	immune response-activating signal transduction	97|2653	402|14725	0.00109152	0.0397244	ENSG00000091831/ENSG00000107485/ENSG00000189334/ENSG00000095261/ENSG00000131981/ENSG00000172936/ENSG00000111679/ENSG00000115267/ENSG00000117983/ENSG00000263528/ENSG00000163220/ENSG00000134830/ENSG00000101096/ENSG00000159216/ENSG00000172551/ENSG00000163636/ENSG00000100906/ENSG00000125999/ENSG00000104783/ENSG00000051523/ENSG00000161031/ENSG00000172243/ENSG00000145675/ENSG00000163874/ENSG00000255690…	ESR1/GATA3/S100A14/PSMD5/LGALS3/MYD88/PTPN6/IFIH1/MUC5B/IKBKE/S100A9/C5AR2/NFATC2/RUNX1/MUCL1/PSMD6/NFKBIA/BPIFB1/KCNN4/CYBA/PGLYRP2/CLEC7A/PIK3R1/ZC3H12A/TRIL/HLA-DRB5/MUC1/TRIM5/RELB/S100A8/PSMB10/MUC3A/CAV1/CCR7/PRKCD/NECTIN2/FFAR2/ITGAM/ARPC1B/PTPRJ/MAPKAPK2/CARD9/WAS/TLR2/BIRC3/VAV2/PAX5/HCK/TICAM1/RNF31/HLA-DRB1/ARPC4/RFTN1/CNPY3/UNC93B1/PSME1/BCAR1/PSMA7/PRKCH/TNFRSF21/MYO1C/ACTB/TNIP2/IRF…	97
BP	GO:0043434	response to peptide hormone	93|2653	383|14725	0.00110795	0.0397684	ENSG00000160182/ENSG00000128564/ENSG00000163083/ENSG00000184557/ENSG00000178567/ENSG00000107562/ENSG00000090339/ENSG00000113494/ENSG00000078401/ENSG00000100219/ENSG00000169047/ENSG00000173175/ENSG00000113739/ENSG00000115457/ENSG00000170476/ENSG00000101144/ENSG00000051523/ENSG00000164850/ENSG00000072310/ENSG00000185338/ENSG00000115461/ENSG00000065325/ENSG00000145675/ENSG00000105929/ENSG00000090020…	TFF1/VGF/INHBB/SOCS3/EPM2AIP1/CXCL12/ICAM1/PRLR/EDN1/XBP1/IRS1/ADCY5/STC2/IGFBP2/MZB1/BMP7/CYBA/GPER1/SREBF1/SOCS1/IGFBP5/GLP2R/PIK3R1/ATP6V0A4/SLC9A1/RPS6KB1/TH/PRKAR1B/STAT5A/EGR1/GPR173/SLC2A1/NR4A2/TNFSF10/GJB2/JUND/CAV1/ZFP36L1/PRKCD/AKT1/CISH/TRIB3/AREG/PTPRE/PXN/GCNT1/GNB2/GNAS/TLR2/CDKN1B/ASS1/PID1/F7/HSD11B2/IGF1R/NGFR/TCIRG1/RARRES2/POR/BCAR1/ATP6V0D1/LRP5/VWA2/ESRRA/CYC1/SOGA1/ATP6V0E1…	93
BP	GO:0007398	ectoderm development	10|2653	20|14725	0.00112093	0.0397684	ENSG00000158055/ENSG00000164690/ENSG00000160685/ENSG00000135374/ENSG00000131080/ENSG00000115109/ENSG00000169896/ENSG00000185479/ENSG00000116809/ENSG00000198742	GRHL3/SHH/ZBTB7B/ELF5/EDA2R/EPB41L5/ITGAM/KRT6B/ZBTB17/SMURF1	10
BP	GO:0060749	mammary gland alveolus development	10|2653	20|14725	0.00112093	0.0397684	ENSG00000091831/ENSG00000163235/ENSG00000178568/ENSG00000110092/ENSG00000169083/ENSG00000109321/ENSG00000135439/ENSG00000112715/ENSG00000138798/ENSG00000204580	ESR1/TGFA/ERBB4/CCND1/AR/AREG/AGAP2/VEGFA/EGF/DDR1	10
BP	GO:0061377	mammary gland lobule development	10|2653	20|14725	0.00112093	0.0397684	ENSG00000091831/ENSG00000163235/ENSG00000178568/ENSG00000110092/ENSG00000169083/ENSG00000109321/ENSG00000135439/ENSG00000112715/ENSG00000138798/ENSG00000204580	ESR1/TGFA/ERBB4/CCND1/AR/AREG/AGAP2/VEGFA/EGF/DDR1	10
BP	GO:0001525	angiogenesis	106|2653	446|14725	0.00114781	0.0404673	ENSG00000137801/ENSG00000144476/ENSG00000205336/ENSG00000145632/ENSG00000189058/ENSG00000006327/ENSG00000120708/ENSG00000164690/ENSG00000138061/ENSG00000141376/ENSG00000116016/ENSG00000167772/ENSG00000163235/ENSG00000169242/ENSG00000106211/ENSG00000125968/ENSG00000138772/ENSG00000173801/ENSG00000179388/ENSG00000078401/ENSG00000100219/ENSG00000159216/ENSG00000128165/ENSG00000136826/ENSG00000092969…	THBS1/ACKR3/ADGRG1/PLK2/APOD/TNFRSF12A/TGFBI/SHH/CYP1B1/BCAS3/EPAS1/ANGPTL4/TGFA/EFNA1/HSPB1/ID1/ANXA3/JUP/EGR3/EDN1/XBP1/RUNX1/ADM2/KLF4/TGFB2/NRP1/C3/SP100/EPHA1/SEMA5A/CDH13/SEMA4A/NRCAM/NOX5/ZC3H12A/HIPK1/EPHB3/LAMA5/LRG1/B4GALT1/ANXA2/EMP2/COL18A1/PDGFA/FAM129B/PLXND1/CAV1/NOTCH3/TNFAIP2/RRAS/MMP19/EMCN/RHOB/CXCL8/EGFL7/CCL2/MYH9/ADAM15/HSPG2/FN1/CIB1/VAV2/NOV/JAG1/PAK4/EPHA2/SHB/OVOL2/TBX4/…	106
BP	GO:0006590	thyroid hormone generation	9|2653	17|14725	0.00118568	0.0412864	ENSG00000107485/ENSG00000125618/ENSG00000211448/ENSG00000197406/ENSG00000115705/ENSG00000105707/ENSG00000104324/ENSG00000105641/ENSG00000135346	GATA3/PAX8/DIO2/DIO3/TPO/HPN/CPQ/SLC5A5/CGA	9
BP	GO:0010866	regulation of triglyceride biosynthetic process	9|2653	17|14725	0.00118568	0.0412864	ENSG00000125730/ENSG00000214456/ENSG00000072310/ENSG00000130164/ENSG00000131408/ENSG00000142178/ENSG00000197296/ENSG00000073060/ENSG00000151365	C3/PLIN5/SREBF1/LDLR/NR1H2/SIK1/FITM2/SCARB1/THRSP	9
BP	GO:0061138	morphogenesis of a branching epithelium	47|2653	170|14725	0.00121331	0.0419895	ENSG00000091831/ENSG00000103067/ENSG00000184292/ENSG00000166145/ENSG00000129514/ENSG00000149418/ENSG00000167642/ENSG00000184557/ENSG00000164690/ENSG00000082175/ENSG00000078401/ENSG00000168743/ENSG00000075223/ENSG00000099250/ENSG00000125618/ENSG00000101144/ENSG00000162552/ENSG00000186350/ENSG00000073282/ENSG00000074527/ENSG00000083307/ENSG00000169083/ENSG00000130702/ENSG00000086062/ENSG00000197461…	ESR1/ESRP2/TACSTD2/SPINT1/FOXA1/ST14/SPINT2/SOCS3/SHH/PGR/EDN1/NPNT/SEMA3C/NRP1/PAX8/BMP7/WNT4/RXRA/TP63/NTN4/GRHL2/AR/LAMA5/B4GALT1/PDGFA/PLXND1/ETV5/AREG/VDR/MSX2/MYCN/EPHA2/LRP5/PPP1CA/CELSR1/NOTCH1/CTNNBIP1/CTSH/VEGFA/EGF/DLL4/GRB2/TGM2/DAG1/KDM5B/DDR1/FZD5	47
BP	GO:0045444	fat cell differentiation	51|2653	188|14725	0.00122375	0.0420926	ENSG00000107485/ENSG00000163083/ENSG00000196878/ENSG00000198125/ENSG00000128016/ENSG00000100219/ENSG00000136826/ENSG00000130529/ENSG00000180694/ENSG00000110092/ENSG00000164850/ENSG00000161642/ENSG00000072310/ENSG00000179588/ENSG00000163874/ENSG00000171236/ENSG00000152518/ENSG00000130173/ENSG00000169136/ENSG00000153234/ENSG00000140044/ENSG00000143365/ENSG00000185650/ENSG00000142208/ENSG00000101255…	GATA3/INHBB/LAMB3/MB/ZFP36/XBP1/KLF4/TRPM4/TMEM64/CCND1/GPER1/ZNF385A/SREBF1/ZFPM1/ZC3H12A/LRG1/ZFP36L2/ANGPTL8/ATF5/NR4A2/JDP2/RORC/ZFP36L1/AKT1/TRIB3/FFAR2/CEBPB/MSX2/METRNL/JAG1/SMAD3/RARRES2/ARID5B/PEX11A/DDIT3/LRP5/AACS/SDF4/NR1D1/HES1/TRPV4/C9orf129/SORT1/SMAD6/IL11/TMEM120A/AKT2/PER2/VSTM2A/NR4A1/BSCL2	51
BP	GO:0010594	regulation of endothelial cell migration	42|2653	148|14725	0.00123839	0.0423378	ENSG00000137801/ENSG00000107485/ENSG00000100311/ENSG00000145632/ENSG00000159167/ENSG00000141376/ENSG00000169242/ENSG00000106211/ENSG00000138772/ENSG00000205542/ENSG00000173801/ENSG00000078401/ENSG00000136826/ENSG00000099250/ENSG00000067066/ENSG00000112902/ENSG00000168874/ENSG00000196189/ENSG00000163874/ENSG00000213853/ENSG00000126561/ENSG00000142208/ENSG00000143878/ENSG00000185043/ENSG00000142627…	THBS1/GATA3/PDGFB/PLK2/STC1/BCAS3/EFNA1/HSPB1/ANXA3/TMSB4X/JUP/EDN1/KLF4/NRP1/SP100/SEMA5A/ATOH8/SEMA4A/ZC3H12A/EMP2/STAT5A/AKT1/RHOB/CIB1/EPHA2/NR2F2/BCAR1/P2RX4/NOTCH1/PDCD6/VEGFA/PLCG1/FGF18/MIR200A/DLL4/DAB2IP/PRKD2/SCARB1/ADGRB1/STARD13/HDAC7/VEGFC	42
BP	GO:0097193	intrinsic apoptotic signaling pathway	69|2653	271|14725	0.00127593	0.0433584	ENSG00000144476/ENSG00000175793/ENSG00000076242/ENSG00000176046/ENSG00000069399/ENSG00000138061/ENSG00000026508/ENSG00000107562/ENSG00000263528/ENSG00000163220/ENSG00000176720/ENSG00000106211/ENSG00000109062/ENSG00000124762/ENSG00000168398/ENSG00000100219/ENSG00000104081/ENSG00000174307/ENSG00000161642/ENSG00000073282/ENSG00000145675/ENSG00000163349/ENSG00000140939/ENSG00000131080/ENSG00000128965…	ACKR3/SFN/MLH1/NUPR1/BCL3/CYP1B1/CD44/CXCL12/IKBKE/S100A9/BOK/HSPB1/SLC9A3R1/CDKN1A/BDKRB2/XBP1/BMF/PHLDA3/ZNF385A/TP63/PIK3R1/HIPK1/NOL3/EDA2R/CHAC1/MUC1/S100A8/CLU/IL20RA/CAV1/BID/PRKCD/TNFRSF1A/AKT1/TRIB3/CEBPB/MMP9/PLEKHF1/GRINA/CRIP1/BBC3/NACC2/DDIT4/FIS1/PRODH/WWOX/EPHA2/ZMAT4/BCL2L1/DDIT3/PTTG1IP/WFS1/ITPR1/DAPK2/ERP29/PPP1R13B/TMBIM6/DAB2IP/SHISA5/ANKRD2/ERN1/HRAS/PTPN1/ELL3/SNAI1/PYCARD/…	69
BP	GO:0097485	neuron projection guidance	59|2653	225|14725	0.00131585	0.0444473	ENSG00000198910/ENSG00000151892/ENSG00000107485/ENSG00000164690/ENSG00000141738/ENSG00000107562/ENSG00000169242/ENSG00000001617/ENSG00000132561/ENSG00000171587/ENSG00000165731/ENSG00000075223/ENSG00000011201/ENSG00000099250/ENSG00000112902/ENSG00000146013/ENSG00000101144/ENSG00000091129/ENSG00000074527/ENSG00000145675/ENSG00000182580/ENSG00000012171/ENSG00000105711/ENSG00000136830/ENSG00000125753…	L1CAM/GFRA1/GATA3/SHH/GRB7/CXCL12/EFNA1/SEMA3F/MATN2/DSCAM/RET/SEMA3C/ANOS1/NRP1/SEMA5A/GFRA3/BMP7/NRCAM/NTN4/PIK3R1/EPHB3/SEMA3B/SCN1B/FAM129B/VASP/GAB2/ARX/RAP1GAP/TUBB3/CXCR4/EFNA4/ARTN/SLIT1/SIAH2/NECTIN1/BCL11B/CELSR3/NGFR/PLXNA3/UNC5A/LAMB2/SEMA5B/ARHGAP35/PLXNA4/APBB2/EFNA3/VEGFA/PLCG1/VLDLR/GRB2/SHC1/DAG1/HRAS/OPHN1/PDLIM7/EFNB2/MAPK3/ERBB2/NPHS1	59
BP	GO:1901890	positive regulation of cell junction assembly	12|2653	27|14725	0.00135114	0.0453676	ENSG00000163347/ENSG00000248905/ENSG00000124145/ENSG00000099250/ENSG00000162552/ENSG00000115109/ENSG00000105974/ENSG00000149177/ENSG00000166949/ENSG00000112715/ENSG00000197747/ENSG00000084636	CLDN1/FMN1/SDC4/NRP1/WNT4/EPB41L5/CAV1/PTPRJ/SMAD3/VEGFA/S100A10/COL16A1	12
BP	GO:0043616	keratinocyte proliferation	14|2653	34|14725	0.00136586	0.0455907	ENSG00000062038/ENSG00000175793/ENSG00000117595/ENSG00000175707/ENSG00000140945/ENSG00000073282/ENSG00000185650/ENSG00000111424/ENSG00000170786/ENSG00000126233/ENSG00000127152/ENSG00000125850/ENSG00000152894/ENSG00000125266	CDH3/SFN/IRF6/KDF1/CDH13/TP63/ZFP36L1/VDR/SDR16C5/SLURP1/BCL11B/OVOL2/PTPRK/EFNB2	14
BP	GO:0002444	myeloid leukocyte mediated immunity	111|2653	473|14725	0.0014201	0.0471222	ENSG00000092929/ENSG00000131981/ENSG00000118640/ENSG00000103196/ENSG00000111679/ENSG00000026508/ENSG00000163220/ENSG00000163191/ENSG00000138772/ENSG00000081277/ENSG00000117984/ENSG00000173801/ENSG00000006534/ENSG00000176978/ENSG00000130303/ENSG00000163636/ENSG00000125730/ENSG00000178372/ENSG00000116260/ENSG00000148346/ENSG00000051523/ENSG00000147813/ENSG00000129353/ENSG00000172794/ENSG00000148180…	UNC13D/LGALS3/VAMP8/CRISPLD2/PTPN6/CD44/S100A9/S100A11/ANXA3/PKP1/CTSD/JUP/ALDH3B1/DPP7/BST2/PSMD6/C3/CALML5/QSOX1/LCN2/CYBA/NAPRT/SLC44A2/RAB37/GSN/LRG1/B4GALT1/ANXA2/FTH1/PLA2G3/GAB2/SLC11A1/CEACAM6/CTSA/NBEAL2/S100A8/S100P/RAB3D/HSPA6/PADI2/PRKCD/PDXK/TSPAN14/TMC6/ITGAM/MMP9/PTPRJ/CAPN1/SERPINB9/GRN/CD63/MVP/PTPRN2/GALNS/TMEM173/IMPDH1/TLR2/WDR1/SNAP25/TCIRG1/ABR/PFKL/ALAD/ACAA1/CPPED1/CNN2/DN…	111
BP	GO:0001892	embryonic placenta development	27|2653	85|14725	0.00150777	0.0494496	ENSG00000171345/ENSG00000170421/ENSG00000166145/ENSG00000149418/ENSG00000188064/ENSG00000100311/ENSG00000167642/ENSG00000184557/ENSG00000116016/ENSG00000171223/ENSG00000183734/ENSG00000101144/ENSG00000083307/ENSG00000123572/ENSG00000185650/ENSG00000142208/ENSG00000172216/ENSG00000125850/ENSG00000164442/ENSG00000136720/ENSG00000185551/ENSG00000161714/ENSG00000128342/ENSG00000114315/ENSG00000177885…	KRT19/KRT8/SPINT1/ST14/WNT7B/PDGFB/SPINT2/SOCS3/EPAS1/JUNB/ASCL2/BMP7/GRHL2/NRK/ZFP36L1/AKT1/CEBPB/OVOL2/CITED2/HS6ST1/NR2F2/PLCD3/LIF/HES1/GRB2/SNAI1/FZD5	27
BP	GO:0030838	positive regulation of actin filament polymerization	27|2653	85|14725	0.00150777	0.0494496	ENSG00000006747/ENSG00000161905/ENSG00000090339/ENSG00000248905/ENSG00000102879/ENSG00000148180/ENSG00000125753/ENSG00000106526/ENSG00000126353/ENSG00000172725/ENSG00000130429/ENSG00000015285/ENSG00000101336/ENSG00000241553/ENSG00000204991/ENSG00000085733/ENSG00000130787/ENSG00000006606/ENSG00000197879/ENSG00000127831/ENSG00000254999/ENSG00000136950/ENSG00000177885/ENSG00000273749/ENSG00000103490…	SCIN/ALOX15/ICAM1/FMN1/CORO1A/GSN/VASP/ACTR3C/CCR7/CORO1B/ARPC1B/WAS/HCK/ARPC4/SPIRE2/CTTN/HIP1R/CCL26/MYO1C/VIL1/BRK1/ARPC5L/GRB2/CYFIP1/PYCARD/WASL/NPHS1	27
BP	GO:0002683	negative regulation of immune system process	83|2653	339|14725	0.00154514	0.0502204	ENSG00000137801/ENSG00000131981/ENSG00000111679/ENSG00000119714/ENSG00000189058/ENSG00000161905/ENSG00000164690/ENSG00000107562/ENSG00000168542/ENSG00000158406/ENSG00000128016/ENSG00000173193/ENSG00000134830/ENSG00000130303/ENSG00000124145/ENSG00000171522/ENSG00000092969/ENSG00000100906/ENSG00000125999/ENSG00000131759/ENSG00000139192/ENSG00000160685/ENSG00000164850/ENSG00000010704/ENSG00000176887…	THBS1/LGALS3/PTPN6/GPR68/APOD/ALOX15/SHH/CXCL12/COL3A1/HIST1H4H/ZFP36/PARP14/C5AR2/BST2/SDC4/PTGER4/TGFB2/NFKBIA/BPIFB1/RARA/TAPBPL/ZBTB7B/GPER1/HFE/SOX11/BCL6/VTCN1/PGLYRP2/ZFPM1/PIK3R1/ZC3H12A/HIST4H4/BANK1/INHA/PADI2/FSTL3/ZFP36L1/CEBPB/NMI/PTPRJ/SERPINB9/CCL2/LDLR/NR1H2/TGFB3/CIB1/CCL28/NOV/TICAM1/HIST1H4K/HLA-DRB1/LEO1/HIST2H4B/AMBP/ABR/GPNMB/IFNL1/TNFRSF21/NPY5R/NOTCH1/TSC22D4/IL17D/IRF1/SE…	83
BP	GO:0043122	regulation of I-kappaB kinase/NF-kappaB signaling	53|2653	199|14725	0.00155577	0.0502204	ENSG00000091831/ENSG00000145632/ENSG00000172936/ENSG00000153714/ENSG00000100097/ENSG00000263528/ENSG00000111321/ENSG00000106211/ENSG00000171604/ENSG00000141574/ENSG00000130303/ENSG00000129353/ENSG00000163874/ENSG00000131080/ENSG00000132256/ENSG00000121858/ENSG00000126353/ENSG00000067182/ENSG00000142208/ENSG00000155366/ENSG00000196924/ENSG00000189067/ENSG00000165233/ENSG00000157593/ENSG00000187796…	ESR1/PLK2/MYD88/LURAP1L/LGALS1/IKBKE/LTBR/HSPB1/CXXC5/SECTM1/BST2/SLC44A2/ZC3H12A/EDA2R/TRIM5/TNFSF10/CCR7/TNFRSF1A/AKT1/RHOC/FLNA/LITAF/CARD19/SLC35B2/CARD9/EEF1D/TRIM25/TRAF3IP2/BIRC3/PLEKHG5/TICAM1/ZMYND11/RNF31/TLE1/TRADD/TRIM8/TNIP2/RHOH/MAP3K14/UBC/IKBKG/IRF3/DAB2IP/SQSTM1/SHARPIN/INAVA/SHISA5/TGM2/APOL3/PYCARD/S100A4/RIPK2/UBE2V1	53
BP	GO:1901652	response to peptide	105|2653	445|14725	0.00155798	0.0502204	ENSG00000160182/ENSG00000128564/ENSG00000163083/ENSG00000184557/ENSG00000178567/ENSG00000107562/ENSG00000090339/ENSG00000125968/ENSG00000128604/ENSG00000113494/ENSG00000078401/ENSG00000100219/ENSG00000169047/ENSG00000173175/ENSG00000136826/ENSG00000113739/ENSG00000100906/ENSG00000115457/ENSG00000170476/ENSG00000101144/ENSG00000051523/ENSG00000164850/ENSG00000072310/ENSG00000155090/ENSG00000185338…	TFF1/VGF/INHBB/SOCS3/EPM2AIP1/CXCL12/ICAM1/ID1/IRF5/PRLR/EDN1/XBP1/IRS1/ADCY5/KLF4/STC2/NFKBIA/IGFBP2/MZB1/BMP7/CYBA/GPER1/SREBF1/KLF10/SOCS1/IGFBP5/GLP2R/PIK3R1/ATP6V0A4/SLC9A1/RPS6KB1/TH/PRKAR1B/STAT5A/EGR1/GPR173/SLC2A1/NR4A2/TNFSF10/GJB2/JUND/CAV1/ZFP36L1/PRKCD/AKT1/CISH/TRIB3/AREG/PTPRE/PXN/GCNT1/GNB2/CARD9/GNAS/FIS1/TLR2/CDKN1B/ASS1/JAG1/PID1/F7/HSD11B2/IGF1R/NGFR/TCIRG1/RARRES2/POR/BCAR1/A…	105
BP	GO:0035148	tube formation	40|2653	141|14725	0.00160656	0.0514921	ENSG00000166145/ENSG00000149418/ENSG00000107485/ENSG00000167642/ENSG00000158055/ENSG00000164690/ENSG00000141376/ENSG00000101115/ENSG00000170561/ENSG00000165731/ENSG00000124145/ENSG00000092969/ENSG00000131759/ENSG00000125618/ENSG00000101144/ENSG00000196576/ENSG00000168874/ENSG00000162552/ENSG00000176887/ENSG00000138771/ENSG00000168758/ENSG00000083307/ENSG00000172819/ENSG00000125753/ENSG00000128567…	SPINT1/ST14/GATA3/SPINT2/GRHL3/SHH/BCAS3/SALL4/IRX2/RET/SDC4/TGFB2/RARA/PAX8/BMP7/PLXNB2/ATOH8/WNT4/SOX11/SHROOM3/SEMA4C/GRHL2/RARG/VASP/PODXL/TEAD2/COBL/FOLR1/OVOL2/CITED2/CELSR1/ARHGAP35/NOTCH1/CFL1/IRX3/VEGFA/DAB2IP/TGM2/IFT122/DVL3	40
BP	GO:0007435	salivary gland morphogenesis	13|2653	31|14725	0.00165014	0.05259	ENSG00000103067/ENSG00000164690/ENSG00000075223/ENSG00000092969/ENSG00000099250/ENSG00000101144/ENSG00000074527/ENSG00000130702/ENSG00000197461/ENSG00000004399/ENSG00000119699/ENSG00000198959/ENSG00000173402	ESRP2/SHH/SEMA3C/TGFB2/NRP1/BMP7/NTN4/LAMA5/PDGFA/PLXND1/TGFB3/TGM2/DAG1	13
BP	GO:0006334	nucleosome assembly	36|2653	124|14725	0.00172797	0.0547288	ENSG00000180543/ENSG00000184678/ENSG00000273802/ENSG00000158373/ENSG00000278828/ENSG00000158406/ENSG00000180596/ENSG00000273983/ENSG00000124635/ENSG00000275713/ENSG00000197903/ENSG00000203814/ENSG00000197837/ENSG00000277224/ENSG00000274267/ENSG00000187837/ENSG00000183598/ENSG00000273542/ENSG00000122390/ENSG00000270276/ENSG00000132475/ENSG00000188375/ENSG00000275714/ENSG00000124575/ENSG00000233822…	TSPYL5/HIST2H2BE/HIST1H2BG/HIST1H2BD/HIST1H3H/HIST1H4H/HIST1H2BC/HIST1H3G/HIST1H2BJ/HIST1H2BH/HIST1H2BK/HIST2H2BF/HIST4H4/HIST1H2BF/HIST1H3B/HIST1H1C/HIST2H3D/HIST1H4K/NAA60/HIST2H4B/H3F3B/H3F3C/HIST1H3A/HIST1H1D/HIST1H2BN/HIST1H2BL/HIST1H2BE/HIST1H3E/HIST1H2BI/H2AFX/TSPYL4/HIST1H4I/CENPX/HIST1H2BO/HIST2H4A/HIST1H3J	36
BP	GO:0010769	regulation of cell morphogenesis involved in differentiation	63|2653	246|14725	0.00173665	0.0547288	ENSG00000184292/ENSG00000198910/ENSG00000124126/ENSG00000092929/ENSG00000143320/ENSG00000176884/ENSG00000006327/ENSG00000198753/ENSG00000107562/ENSG00000169242/ENSG00000001617/ENSG00000125968/ENSG00000103260/ENSG00000171587/ENSG00000165731/ENSG00000164050/ENSG00000129682/ENSG00000099250/ENSG00000172830/ENSG00000078018/ENSG00000112902/ENSG00000196576/ENSG00000105695/ENSG00000089820/ENSG00000091129…	TACSTD2/L1CAM/PREX1/UNC13D/CRABP2/GRIN1/TNFRSF12A/PLXNB3/CXCL12/EFNA1/SEMA3F/ID1/METRN/DSCAM/RET/PLXNB1/FGF13/NRP1/SSH3/MAP2/SEMA5A/PLXNB2/MAG/ARHGAP4/NRCAM/FSTL4/ARC/EPHB3/OLFM1/ULK2/PLXND1/CAMK2B/DMTN/PPP3CA/FLNA/FN1/CUX1/CIB1/NGFR/ITPKA/PLXNA3/CTTN/SS18L1/ARHGAP35/PLXNA4/CUL7/CFL1/RNF6/VEGFA/TRPC6/S100A10/RTN4R/AMIGO1/LIMK1/CYFIP1/MYADM/MARK2/KNDC1/DOCK5/CDKL5/KIF13B/OBSL1/NTRK3	63
BP	GO:0007411	axon guidance	58|2653	223|14725	0.00176542	0.0547864	ENSG00000198910/ENSG00000151892/ENSG00000107485/ENSG00000164690/ENSG00000141738/ENSG00000107562/ENSG00000169242/ENSG00000001617/ENSG00000132561/ENSG00000171587/ENSG00000165731/ENSG00000075223/ENSG00000011201/ENSG00000099250/ENSG00000112902/ENSG00000146013/ENSG00000101144/ENSG00000091129/ENSG00000074527/ENSG00000145675/ENSG00000182580/ENSG00000012171/ENSG00000105711/ENSG00000136830/ENSG00000125753…	L1CAM/GFRA1/GATA3/SHH/GRB7/CXCL12/EFNA1/SEMA3F/MATN2/DSCAM/RET/SEMA3C/ANOS1/NRP1/SEMA5A/GFRA3/BMP7/NRCAM/NTN4/PIK3R1/EPHB3/SEMA3B/SCN1B/FAM129B/VASP/GAB2/ARX/RAP1GAP/TUBB3/CXCR4/EFNA4/ARTN/SLIT1/SIAH2/NECTIN1/BCL11B/CELSR3/NGFR/PLXNA3/UNC5A/LAMB2/ARHGAP35/PLXNA4/APBB2/EFNA3/VEGFA/PLCG1/VLDLR/GRB2/SHC1/DAG1/HRAS/OPHN1/PDLIM7/EFNB2/MAPK3/ERBB2/NPHS1	58
BP	GO:0010595	positive regulation of endothelial cell migration	28|2653	90|14725	0.00176925	0.0547864	ENSG00000137801/ENSG00000107485/ENSG00000100311/ENSG00000145632/ENSG00000141376/ENSG00000106211/ENSG00000138772/ENSG00000205542/ENSG00000078401/ENSG00000099250/ENSG00000112902/ENSG00000168874/ENSG00000163874/ENSG00000126561/ENSG00000142208/ENSG00000143878/ENSG00000185043/ENSG00000050820/ENSG00000135124/ENSG00000249915/ENSG00000112715/ENSG00000124181/ENSG00000156427/ENSG00000207607/ENSG00000105287…	THBS1/GATA3/PDGFB/PLK2/BCAS3/HSPB1/ANXA3/TMSB4X/EDN1/NRP1/SEMA5A/ATOH8/ZC3H12A/STAT5A/AKT1/RHOB/CIB1/BCAR1/P2RX4/PDCD6/VEGFA/PLCG1/FGF18/MIR200A/PRKD2/SCARB1/HDAC7/VEGFC	28
BP	GO:0007219	Notch signaling pathway	45|2653	164|14725	0.0017945	0.0547864	ENSG00000171345/ENSG00000129514/ENSG00000163435/ENSG00000121068/ENSG00000178498/ENSG00000106003/ENSG00000092969/ENSG00000100906/ENSG00000197070/ENSG00000213694/ENSG00000101144/ENSG00000139352/ENSG00000110042/ENSG00000113916/ENSG00000073282/ENSG00000181830/ENSG00000136830/ENSG00000128965/ENSG00000004399/ENSG00000108175/ENSG00000074181/ENSG00000108219/ENSG00000187957/ENSG00000172889/ENSG00000214357…	KRT19/FOXA1/ELF3/TBX2/DTX3/LFNG/TGFB2/NFKBIA/ARRDC1/S1PR3/BMP7/ASCL1/DTX4/BCL6/TP63/SLC35C1/FAM129B/CHAC1/PLXND1/ZMIZ1/NOTCH3/TSPAN14/DNER/EGFL7/NEURL1B/WWP2/CDKN1B/NOV/JAG1/JAG2/ANXA4/MDK/MESP1/WWC1/NOTCH1/TCIM/HES1/ARRB1/EGF/UBC/DLL4/APH1A/SNAI1/ONECUT1/DTX2	45
BP	GO:0051048	negative regulation of secretion	45|2653	164|14725	0.0017945	0.0547864	ENSG00000065361/ENSG00000163083/ENSG00000118640/ENSG00000205542/ENSG00000183044/ENSG00000050628/ENSG00000134830/ENSG00000078401/ENSG00000169047/ENSG00000171522/ENSG00000007384/ENSG00000153246/ENSG00000072310/ENSG00000182054/ENSG00000163874/ENSG00000153064/ENSG00000123999/ENSG00000138814/ENSG00000099625/ENSG00000127838/ENSG00000274286/ENSG00000115414/ENSG00000093010/ENSG00000136999/ENSG00000196975…	ERBB3/INHBB/VAMP8/TMSB4X/ABAT/PTGER3/C5AR2/EDN1/IRS1/PTGER4/RHBDF1/PLA2R1/SREBF1/IDH2/ZC3H12A/BANK1/INHA/PPP3CA/CBARP/PNKD/ADRA2B/FN1/COMT/NOV/ANXA4/ABR/PFKL/MIDN/HRH3/TNFRSF21/NPY5R/NOTCH1/PIM3/CRY2/RSAD2/LIF/RHBDF2/ADRA2C/EGF/ERP29/TMBIM6/KCNJ11/INHBA/IL11/CPTP	45
BP	GO:0022604	regulation of cell morphogenesis	97|2653	408|14725	0.00179659	0.0547864	ENSG00000184292/ENSG00000198910/ENSG00000124126/ENSG00000092929/ENSG00000143320/ENSG00000176884/ENSG00000006327/ENSG00000026508/ENSG00000198753/ENSG00000095739/ENSG00000107562/ENSG00000090339/ENSG00000169242/ENSG00000001617/ENSG00000186174/ENSG00000125968/ENSG00000127084/ENSG00000109062/ENSG00000103260/ENSG00000171587/ENSG00000165731/ENSG00000164050/ENSG00000129682/ENSG00000099250/ENSG00000172830…	TACSTD2/L1CAM/PREX1/UNC13D/CRABP2/GRIN1/TNFRSF12A/CD44/PLXNB3/BAMBI/CXCL12/ICAM1/EFNA1/SEMA3F/BCL9L/ID1/FGD3/SLC9A3R1/METRN/DSCAM/RET/PLXNB1/FGF13/NRP1/SSH3/MAP2/SEMA5A/PLXNB2/MYL12B/MAG/SEMA4A/CORO1A/ARHGAP4/NRCAM/RASAL1/SHROOM3/FSTL4/ARC/EPHB3/OLFM1/ULK2/PLXND1/CAMK2B/CORO1B/DMTN/PPP3CA/HPN/TPM1/FLNA/C21orf2/CCL2/MYH9/FN1/CUX1/CIB1/MYH14/WDR1/HCK/TTBK1/NGFR/ITPKA/PLXNA3/FBLIM1/CTTN/FITM2/SS18L1…	97
BP	GO:0051894	positive regulation of focal adhesion assembly	10|2653	21|14725	0.00179675	0.0547864	ENSG00000248905/ENSG00000124145/ENSG00000099250/ENSG00000162552/ENSG00000115109/ENSG00000149177/ENSG00000166949/ENSG00000112715/ENSG00000197747/ENSG00000084636	FMN1/SDC4/NRP1/WNT4/EPB41L5/PTPRJ/SMAD3/VEGFA/S100A10/COL16A1	10
BP	GO:0051607	defense response to virus	50|2653	187|14725	0.00189803	0.0574161	ENSG00000169871/ENSG00000092929/ENSG00000142089/ENSG00000115267/ENSG00000187608/ENSG00000157601/ENSG00000111331/ENSG00000166801/ENSG00000128604/ENSG00000138496/ENSG00000135114/ENSG00000130303/ENSG00000163840/ENSG00000111335/ENSG00000164430/ENSG00000163874/ENSG00000089127/ENSG00000132256/ENSG00000172183/ENSG00000179750/ENSG00000119922/ENSG00000185201/ENSG00000187796/ENSG00000168310/ENSG00000130813…	TRIM56/UNC13D/IFITM3/IFIH1/ISG15/MX1/OAS3/FAM111A/IRF5/PARP9/OASL/BST2/DTX3L/OAS2/CGAS/ZC3H12A/OAS1/TRIM5/ISG20/APOBEC3B/IFIT2/IFITM2/CARD9/IRF2/C19orf66/TRIM25/DDIT4/TMEM173/TRAF3IP2/IFITM1/BIRC3/TICAM1/ZMYND11/IFIT3/UNC93B1/ABCF3/IFNL1/IRF1/RSAD2/SERINC5/MAP3K14/MX2/EXOSC4/IL27/IRF3/TARBP2/ADARB1/NOP53/DHX58/PYCARD	50
BP	GO:0000183	chromatin silencing at rDNA	14|2653	35|14725	0.00190335	0.0574161	ENSG00000278828/ENSG00000158406/ENSG00000273983/ENSG00000197837/ENSG00000274267/ENSG00000183598/ENSG00000273542/ENSG00000270276/ENSG00000132475/ENSG00000275714/ENSG00000274750/ENSG00000276180/ENSG00000270882/ENSG00000197153	HIST1H3H/HIST1H4H/HIST1H3G/HIST4H4/HIST1H3B/HIST2H3D/HIST1H4K/HIST2H4B/H3F3B/HIST1H3A/HIST1H3E/HIST1H4I/HIST2H4A/HIST1H3J	14
BP	GO:0034333	adherens junction assembly	25|2653	78|14725	0.00192726	0.0578281	ENSG00000137801/ENSG00000189058/ENSG00000141376/ENSG00000173156/ENSG00000173801/ENSG00000248905/ENSG00000124145/ENSG00000099250/ENSG00000162552/ENSG00000163349/ENSG00000090020/ENSG00000130702/ENSG00000115109/ENSG00000158856/ENSG00000149177/ENSG00000087077/ENSG00000166949/ENSG00000152894/ENSG00000085733/ENSG00000076826/ENSG00000072110/ENSG00000112715/ENSG00000197747/ENSG00000084636/ENSG00000101665	THBS1/APOD/BCAS3/RHOD/JUP/FMN1/SDC4/NRP1/WNT4/HIPK1/SLC9A1/LAMA5/EPB41L5/DMTN/PTPRJ/TRIP6/SMAD3/PTPRK/CTTN/CAMSAP3/ACTN1/VEGFA/S100A10/COL16A1/SMAD7	25
BP	GO:1901888	regulation of cell junction assembly	24|2653	74|14725	0.00196677	0.0587012	ENSG00000137801/ENSG00000189058/ENSG00000163347/ENSG00000141376/ENSG00000173156/ENSG00000248905/ENSG00000159216/ENSG00000124145/ENSG00000099250/ENSG00000162552/ENSG00000090020/ENSG00000115109/ENSG00000105974/ENSG00000158856/ENSG00000149177/ENSG00000166949/ENSG00000027075/ENSG00000076826/ENSG00000197879/ENSG00000112715/ENSG00000197747/ENSG00000084636/ENSG00000124216/ENSG00000163251	THBS1/APOD/CLDN1/BCAS3/RHOD/FMN1/RUNX1/SDC4/NRP1/WNT4/SLC9A1/EPB41L5/CAV1/DMTN/PTPRJ/SMAD3/PRKCH/CAMSAP3/MYO1C/VEGFA/S100A10/COL16A1/SNAI1/FZD5	24
BP	GO:1905954	positive regulation of lipid localization	21|2653	62|14725	0.00201775	0.0593287	ENSG00000160179/ENSG00000263528/ENSG00000144452/ENSG00000078401/ENSG00000101188/ENSG00000100906/ENSG00000125730/ENSG00000214456/ENSG00000153246/ENSG00000163874/ENSG00000182718/ENSG00000135245/ENSG00000163932/ENSG00000131408/ENSG00000118513/ENSG00000165029/ENSG00000197296/ENSG00000135124/ENSG00000110047/ENSG00000073060/ENSG00000170419	ABCG1/IKBKE/ABCA12/EDN1/NTSR1/NFKBIA/C3/PLIN5/PLA2R1/ZC3H12A/ANXA2/HILPDA/PRKCD/NR1H2/MYB/ABCA1/FITM2/P2RX4/EHD1/SCARB1/VSTM2A	21
BP	GO:0002577	regulation of antigen processing and presentation	7|2653	12|14725	0.0020723	0.0593287	ENSG00000137801/ENSG00000139192/ENSG00000010704/ENSG00000018280/ENSG00000126353/ENSG00000015285/ENSG00000103490	THBS1/TAPBPL/HFE/SLC11A1/CCR7/WAS/PYCARD	7
BP	GO:0034114	regulation of heterotypic cell-cell adhesion	7|2653	12|14725	0.0020723	0.0593287	ENSG00000161905/ENSG00000026508/ENSG00000197971/ENSG00000136826/ENSG00000101144/ENSG00000179820/ENSG00000136689	ALOX15/CD44/MBP/KLF4/BMP7/MYADM/IL1RN	7
BP	GO:0045683	negative regulation of epidermis development	7|2653	12|14725	0.0020723	0.0593287	ENSG00000062038/ENSG00000073282/ENSG00000083307/ENSG00000120149/ENSG00000148400/ENSG00000114315/ENSG00000122641	CDH3/TP63/GRHL2/MSX2/NOTCH1/HES1/INHBA	7
BP	GO:0061307	cardiac neural crest cell differentiation involved in heart development	7|2653	12|14725	0.0020723	0.0593287	ENSG00000075223/ENSG00000101144/ENSG00000110195/ENSG00000101384/ENSG00000164442/ENSG00000114315/ENSG00000102882	SEMA3C/BMP7/FOLR1/JAG1/CITED2/HES1/MAPK3	7
BP	GO:0061308	cardiac neural crest cell development involved in heart development	7|2653	12|14725	0.0020723	0.0593287	ENSG00000075223/ENSG00000101144/ENSG00000110195/ENSG00000101384/ENSG00000164442/ENSG00000114315/ENSG00000102882	SEMA3C/BMP7/FOLR1/JAG1/CITED2/HES1/MAPK3	7
BP	GO:2001028	positive regulation of endothelial cell chemotaxis	7|2653	12|14725	0.0020723	0.0593287	ENSG00000106211/ENSG00000205542/ENSG00000112902/ENSG00000135124/ENSG00000112715/ENSG00000156427/ENSG00000105287	HSPB1/TMSB4X/SEMA5A/P2RX4/VEGFA/FGF18/PRKD2	7
BP	GO:2000736	regulation of stem cell differentiation	38|2653	134|14725	0.00208581	0.0593287	ENSG00000184292/ENSG00000107485/ENSG00000095261/ENSG00000278828/ENSG00000158406/ENSG00000273983/ENSG00000159216/ENSG00000163636/ENSG00000075223/ENSG00000092969/ENSG00000101144/ENSG00000197837/ENSG00000152518/ENSG00000205220/ENSG00000074219/ENSG00000274267/ENSG00000118513/ENSG00000183598/ENSG00000101384/ENSG00000273542/ENSG00000270276/ENSG00000132475/ENSG00000092010/ENSG00000275714/ENSG00000101182…	TACSTD2/GATA3/PSMD5/HIST1H3H/HIST1H4H/HIST1H3G/RUNX1/PSMD6/SEMA3C/TGFB2/BMP7/HIST4H4/ZFP36L2/PSMB10/TEAD2/HIST1H3B/MYB/HIST2H3D/JAG1/HIST1H4K/HIST2H4B/H3F3B/PSME1/HIST1H3A/PSMA7/NOTCH1/LTBP3/PSMC5/HES1/HIST1H3E/UBC/PSME2/HIST1H4I/PSMD4/TCF3/HIST2H4A/PSMB4/HIST1H3J	38
BP	GO:0045618	positive regulation of keratinocyte differentiation	8|2653	15|14725	0.00211499	0.0593287	ENSG00000124151/ENSG00000162891/ENSG00000111424/ENSG00000125850/ENSG00000137497/ENSG00000027075/ENSG00000148400/ENSG00000221926	NCOA3/IL20/VDR/OVOL2/NUMA1/PRKCH/NOTCH1/TRIM16	8
BP	GO:0090136	epithelial cell-cell adhesion	8|2653	15|14725	0.00211499	0.0593287	ENSG00000138061/ENSG00000173801/ENSG00000166689/ENSG00000166401/ENSG00000136999/ENSG00000082781/ENSG00000076826/ENSG00000044115	CYP1B1/JUP/PLEKHA7/SERPINB8/NOV/ITGB5/CAMSAP3/CTNNA1	8
BP	GO:1900103	positive regulation of endoplasmic reticulum unfolded protein response	8|2653	15|14725	0.00211499	0.0593287	ENSG00000106541/ENSG00000176720/ENSG00000100219/ENSG00000145675/ENSG00000105327/ENSG00000136848/ENSG00000178607/ENSG00000196396	AGR2/BOK/XBP1/PIK3R1/BBC3/DAB2IP/ERN1/PTPN1	8
BP	GO:0097530	granulocyte migration	28|2653	91|14725	0.00212404	0.0593287	ENSG00000137801/ENSG00000124126/ENSG00000189334/ENSG00000131981/ENSG00000172936/ENSG00000163220/ENSG00000115594/ENSG00000134830/ENSG00000078401/ENSG00000171522/ENSG00000092969/ENSG00000143546/ENSG00000127129/ENSG00000126353/ENSG00000169429/ENSG00000108691/ENSG00000163702/ENSG00000102962/ENSG00000071127/ENSG00000106538/ENSG00000115009/ENSG00000006606/ENSG00000035664/ENSG00000111199/ENSG00000151651…	THBS1/PREX1/S100A14/LGALS3/MYD88/S100A9/IL1R1/C5AR2/EDN1/PTGER4/TGFB2/S100A8/EDN2/CCR7/CXCL8/CCL2/IL17RC/CCL22/WDR1/RARRES2/CCL20/CCL26/DAPK2/TRPV4/ADAM8/VAV3/MAPK3/VAV1	28
BP	GO:0001890	placenta development	40|2653	143|14725	0.00213586	0.0593287	ENSG00000171345/ENSG00000170421/ENSG00000166145/ENSG00000149418/ENSG00000188064/ENSG00000100311/ENSG00000167642/ENSG00000184557/ENSG00000159167/ENSG00000064195/ENSG00000116016/ENSG00000171223/ENSG00000242265/ENSG00000183734/ENSG00000182195/ENSG00000113739/ENSG00000101144/ENSG00000186350/ENSG00000083307/ENSG00000123572/ENSG00000165474/ENSG00000188910/ENSG00000185650/ENSG00000142208/ENSG00000172216…	KRT19/KRT8/SPINT1/ST14/WNT7B/PDGFB/SPINT2/SOCS3/STC1/DLX3/EPAS1/JUNB/PEG10/ASCL2/LDOC1/STC2/BMP7/RXRA/GRHL2/NRK/GJB2/GJB3/ZFP36L1/AKT1/CEBPB/VDR/CDKN1B/OVOL2/CITED2/HS6ST1/NR2F2/PLCD3/FOSL1/CUL7/LIF/HES1/GRB2/SNAI1/FZD5/CTSB	40
BP	GO:1903531	negative regulation of secretion by cell	40|2653	143|14725	0.00213586	0.0593287	ENSG00000163083/ENSG00000118640/ENSG00000205542/ENSG00000183044/ENSG00000134830/ENSG00000078401/ENSG00000169047/ENSG00000171522/ENSG00000007384/ENSG00000072310/ENSG00000182054/ENSG00000163874/ENSG00000153064/ENSG00000123999/ENSG00000138814/ENSG00000099625/ENSG00000127838/ENSG00000274286/ENSG00000115414/ENSG00000136999/ENSG00000196975/ENSG00000159842/ENSG00000141959/ENSG00000167470/ENSG00000101180…	INHBB/VAMP8/TMSB4X/ABAT/C5AR2/EDN1/IRS1/PTGER4/RHBDF1/SREBF1/IDH2/ZC3H12A/BANK1/INHA/PPP3CA/CBARP/PNKD/ADRA2B/FN1/NOV/ANXA4/ABR/PFKL/MIDN/HRH3/TNFRSF21/NPY5R/NOTCH1/PIM3/CRY2/RSAD2/LIF/RHBDF2/ADRA2C/ERP29/TMBIM6/KCNJ11/INHBA/IL11/CPTP	40
BP	GO:0030072	peptide hormone secretion	55|2653	211|14725	0.00216617	0.0593287	ENSG00000128564/ENSG00000163083/ENSG00000119714/ENSG00000183044/ENSG00000011347/ENSG00000078401/ENSG00000169047/ENSG00000270885/ENSG00000170745/ENSG00000145103/ENSG00000173175/ENSG00000130529/ENSG00000125618/ENSG00000164850/ENSG00000072310/ENSG00000010704/ENSG00000110090/ENSG00000003147/ENSG00000117394/ENSG00000096433/ENSG00000183844/ENSG00000138814/ENSG00000126262/ENSG00000170498/ENSG00000120451…	VGF/INHBB/GPR68/ABAT/SYT7/EDN1/IRS1/RASL10B/KCNS3/ILDR1/ADCY5/TRPM4/PAX8/GPER1/SREBF1/HFE/CPT1A/ICA1/SLC2A1/ITPR3/FAM3B/PPP3CA/FFAR2/KISS1/SNX19/TFR2/GNAS/PTPRN2/NOV/HLA-DRB1/STX1A/SLC25A6/SNAP25/PFKL/SMPD3/MAFA/LRP5/MIDN/AACS/PIM3/ITPR1/PHPT1/NR1D1/TRPV4/CPLX1/ADRA2C/ARRB1/MYO5A/SSTR5/EXOC3L1/KCNJ11/IL1RN/MYRIP/CACNA1D/PER2	55
BP	GO:0097164	ammonium ion metabolic process	48|2653	179|14725	0.00216626	0.0593287	ENSG00000170775/ENSG00000121316/ENSG00000214530/ENSG00000183044/ENSG00000168350/ENSG00000151632/ENSG00000196139/ENSG00000184845/ENSG00000087085/ENSG00000092969/ENSG00000168907/ENSG00000187134/ENSG00000129353/ENSG00000110090/ENSG00000150540/ENSG00000180176/ENSG00000123453/ENSG00000177076/ENSG00000100078/ENSG00000153234/ENSG00000163932/ENSG00000176485/ENSG00000169896/ENSG00000130164/ENSG00000133328…	GPR37/PLBD1/STARD10/ABAT/DEGS2/AKR1C2/AKR1C3/DRD1/ACHE/TGFB2/PLA2G4F/AKR1C1/SLC44A2/CPT1A/HNMT/TH/SARDH/ACER2/PLA2G3/NR4A2/PRKCD/PLA2G16/ITGAM/LDLR/HRASLS2/PNKD/GDPD3/COMT/MBOAT1/RARRES3/POR/SMPD3/SLC22A4/LPIN3/SAT1/SPTLC3/SLC44A1/PLA2G4C/PLA2G15/DBI/RNF180/AKR1B10/AGMAT/SCARB1/SLC22A5/GCH1/PCYT1A/CDS1	48
BP	GO:0050770	regulation of axonogenesis	42|2653	152|14725	0.00216658	0.0593287	ENSG00000198910/ENSG00000143320/ENSG00000176884/ENSG00000006327/ENSG00000198753/ENSG00000107562/ENSG00000169242/ENSG00000001617/ENSG00000103260/ENSG00000171587/ENSG00000165731/ENSG00000164050/ENSG00000129682/ENSG00000099250/ENSG00000172830/ENSG00000078018/ENSG00000112902/ENSG00000196576/ENSG00000105695/ENSG00000089820/ENSG00000091129/ENSG00000053108/ENSG00000182580/ENSG00000130558/ENSG00000083290…	L1CAM/CRABP2/GRIN1/TNFRSF12A/PLXNB3/CXCL12/EFNA1/SEMA3F/METRN/DSCAM/RET/PLXNB1/FGF13/NRP1/SSH3/MAP2/SEMA5A/PLXNB2/MAG/ARHGAP4/NRCAM/FSTL4/EPHB3/OLFM1/ULK2/PLXND1/FN1/NGFR/PLXNA3/CTTN/ARHGAP35/PLXNA4/RNF6/VEGFA/RTN4R/AMIGO1/LIMK1/CYFIP1/MARK2/CDKL5/KIF13B/NTRK3	42
BP	GO:0050817	coagulation	74|2653	300|14725	0.00218622	0.0595771	ENSG00000137801/ENSG00000159176/ENSG00000107485/ENSG00000100311/ENSG00000111679/ENSG00000164690/ENSG00000278828/ENSG00000178726/ENSG00000168542/ENSG00000163220/ENSG00000010278/ENSG00000106211/ENSG00000054179/ENSG00000183044/ENSG00000078401/ENSG00000156049/ENSG00000273983/ENSG00000101608/ENSG00000171903/ENSG00000187848/ENSG00000198517/ENSG00000179588/ENSG00000145675/ENSG00000107099/ENSG00000182718…	THBS1/CSRP1/GATA3/PDGFB/PTPN6/SHH/HIST1H3H/THBD/COL3A1/S100A9/CD9/HSPB1/ENTPD2/ABAT/EDN1/GNA14/HIST1H3G/MYL12A/CYP4F11/P2RX2/MAFK/ZFPM1/PIK3R1/DOCK8/ANXA2/PRKAR1B/PDGFA/TFPI/CAV1/ITPR3/PRKCD/DMTN/AKT1/FLNA/RHOB/IRF2/HIST1H3B/GNAS/MYH9/WAS/HIST2H3D/ADRA2B/VAV2/F7/H3F3B/ANXA4/SERPINA5/MAFF/HIST1H3A/P2RX4/ITPK1/PRKCH/ACTB/RAD51C/EHD1/IRF1/ITPR1/F12/SERPING1/TRPC6/HIST1H3E/ADRA2C/ARRB1/VWF/DOCK6/MICA…	74
BP	GO:0045667	regulation of osteoblast differentiation	31|2653	104|14725	0.00222239	0.0602715	ENSG00000188064/ENSG00000170468/ENSG00000124813/ENSG00000125968/ENSG00000168743/ENSG00000130529/ENSG00000141232/ENSG00000180694/ENSG00000101144/ENSG00000162552/ENSG00000176887/ENSG00000073282/ENSG00000115461/ENSG00000130522/ENSG00000177706/ENSG00000172216/ENSG00000109321/ENSG00000120149/ENSG00000087460/ENSG00000185885/ENSG00000101384/ENSG00000166949/ENSG00000090539/ENSG00000162337/ENSG00000173153…	WNT7B/RIOX1/RUNX2/ID1/NPNT/TRPM4/TOB1/TMEM64/BMP7/WNT4/SOX11/TP63/IGFBP5/JUND/FAM20C/CEBPB/AREG/MSX2/GNAS/IFITM1/JAG1/SMAD3/CHRD/LRP5/ESRRA/NOTCH1/CTNNBIP1/ATP6AP1/ZHX3/PDLIM7/HDAC7	31
BP	GO:0090066	regulation of anatomical structure size	99|2653	421|14725	0.00233143	0.0626898	ENSG00000198910/ENSG00000188064/ENSG00000124126/ENSG00000143320/ENSG00000006747/ENSG00000006327/ENSG00000161905/ENSG00000107562/ENSG00000090339/ENSG00000001617/ENSG00000175591/ENSG00000205542/ENSG00000109062/ENSG00000171587/ENSG00000165731/ENSG00000168398/ENSG00000078401/ENSG00000184845/ENSG00000248905/ENSG00000129682/ENSG00000130529/ENSG00000099250/ENSG00000172830/ENSG00000112902/ENSG00000104783…	L1CAM/WNT7B/PREX1/CRABP2/SCIN/TNFRSF12A/ALOX15/CXCL12/ICAM1/SEMA3F/P2RY2/TMSB4X/SLC9A3R1/DSCAM/RET/BDKRB2/EDN1/DRD1/FMN1/FGF13/TRPM4/NRP1/SSH3/SEMA5A/KCNN4/CHRM1/GPER1/MAG/CORO1A/ARHGAP4/NRCAM/FSTL4/GSN/OLFM1/RARG/ULK2/VASP/ACTR3C/HTR1D/EDN2/PLOD3/CAV1/CCR7/CORO1B/PRKCD/DMTN/AKT1/ARPC1B/LAMTOR5/WAS/ADRA2B/FN1/WDR1/CDHR2/VAV2/HCK/ARPC4/DEPTOR/RAB22A/SPIRE2/PLXNA3/PEX11A/CTTN/HIP1R/PPP1CA/ARHGAP35/…	99
BP	GO:0010634	positive regulation of epithelial cell migration	36|2653	126|14725	0.00233993	0.0626898	ENSG00000137801/ENSG00000107485/ENSG00000132698/ENSG00000100311/ENSG00000145632/ENSG00000141376/ENSG00000106211/ENSG00000138772/ENSG00000205542/ENSG00000005884/ENSG00000078401/ENSG00000092969/ENSG00000099250/ENSG00000112902/ENSG00000168874/ENSG00000163874/ENSG00000126561/ENSG00000115109/ENSG00000142208/ENSG00000100985/ENSG00000143878/ENSG00000185043/ENSG00000050820/ENSG00000135124/ENSG00000249915…	THBS1/GATA3/RAB25/PDGFB/PLK2/BCAS3/HSPB1/ANXA3/TMSB4X/ITGA3/EDN1/TGFB2/NRP1/SEMA5A/ATOH8/ZC3H12A/STAT5A/EPB41L5/AKT1/MMP9/RHOB/CIB1/BCAR1/P2RX4/PDCD6/CTSH/VEGFA/VIL1/PLCG1/FGF18/MIR200A/PRKD2/SCARB1/HDAC7/DOCK5/VEGFC	36
BP	GO:0002251	organ or tissue specific immune response	11|2653	25|14725	0.00235601	0.0626898	ENSG00000184678/ENSG00000273802/ENSG00000124839/ENSG00000180596/ENSG00000125999/ENSG00000124635/ENSG00000197903/ENSG00000277224/ENSG00000126262/ENSG00000274290/ENSG00000278588	HIST2H2BE/HIST1H2BG/RAB17/HIST1H2BC/BPIFB1/HIST1H2BJ/HIST1H2BK/HIST1H2BF/FFAR2/HIST1H2BE/HIST1H2BI	11
BP	GO:0010837	regulation of keratinocyte proliferation	11|2653	25|14725	0.00235601	0.0626898	ENSG00000062038/ENSG00000175793/ENSG00000175707/ENSG00000073282/ENSG00000185650/ENSG00000111424/ENSG00000126233/ENSG00000127152/ENSG00000125850/ENSG00000152894/ENSG00000125266	CDH3/SFN/KDF1/TP63/ZFP36L1/VDR/SLURP1/BCL11B/OVOL2/PTPRK/EFNB2	11
BP	GO:0043547	positive regulation of GTPase activity	88|2653	368|14725	0.00238843	0.0632543	ENSG00000124126/ENSG00000158055/ENSG00000141376/ENSG00000073350/ENSG00000138835/ENSG00000090339/ENSG00000130762/ENSG00000164050/ENSG00000142632/ENSG00000111490/ENSG00000008323/ENSG00000188157/ENSG00000099250/ENSG00000146904/ENSG00000095383/ENSG00000143333/ENSG00000162552/ENSG00000089820/ENSG00000135905/ENSG00000111344/ENSG00000050327/ENSG00000182732/ENSG00000205517/ENSG00000109436/ENSG00000107099…	PREX1/GRHL3/BCAS3/LLGL2/RGS3/ICAM1/ARHGEF16/PLXNB1/ARHGEF19/TBC1D30/PLEKHG6/AGRN/NRP1/EPHA1/TBC1D2/RGS16/WNT4/ARHGAP4/DOCK10/RASAL1/ARHGEF5/RGS6/RGL3/TBC1D9/DOCK8/RAP1GAP/ARHGEF10L/GNB5/CCR7/ALS2CL/SRGAP1/CCL2/ARHGEF37/RABEP2/GNAS/F11R/RASA3/CCL22/RGS11/EPHA2/AGAP2/ABR/ACAP3/ARHGAP1/TBC1D17/MTSS1L/ASAP2/TBC1D10A/CCL20/DOCK2/ARHGAP39/ARHGAP35/CCL26/SIPA1L3/ARHGAP8/RASGRP1/ARHGAP36/S100A10/ARRB1/RI…	88
BP	GO:0007249	I-kappaB kinase/NF-kappaB signaling	58|2653	226|14725	0.00245133	0.0643596	ENSG00000091831/ENSG00000069399/ENSG00000145632/ENSG00000172936/ENSG00000153714/ENSG00000100097/ENSG00000263528/ENSG00000111321/ENSG00000106211/ENSG00000171604/ENSG00000141574/ENSG00000130303/ENSG00000100906/ENSG00000129353/ENSG00000163874/ENSG00000131080/ENSG00000132256/ENSG00000104856/ENSG00000121858/ENSG00000126353/ENSG00000067182/ENSG00000142208/ENSG00000155366/ENSG00000196924/ENSG00000189067…	ESR1/BCL3/PLK2/MYD88/LURAP1L/LGALS1/IKBKE/LTBR/HSPB1/CXXC5/SECTM1/BST2/NFKBIA/SLC44A2/ZC3H12A/EDA2R/TRIM5/RELB/TNFSF10/CCR7/TNFRSF1A/AKT1/RHOC/FLNA/LITAF/CARD19/SLC35B2/CARD9/NFKB2/EEF1D/TRIM25/TRAF3IP2/TLR2/BIRC3/PLEKHG5/TICAM1/ZMYND11/RNF31/TLE1/TRADD/TRIM8/TNIP2/RHOH/MAP3K14/UBC/IKBKG/IRF3/DAB2IP/SQSTM1/SHARPIN/INAVA/SHISA5/TGM2/APOL3/PYCARD/S100A4/RIPK2/UBE2V1	58
BP	GO:0050920	regulation of chemotaxis	40|2653	144|14725	0.00245299	0.0643596	ENSG00000137801/ENSG00000189334/ENSG00000100311/ENSG00000107562/ENSG00000001617/ENSG00000106211/ENSG00000205542/ENSG00000134830/ENSG00000171587/ENSG00000078401/ENSG00000099250/ENSG00000112902/ENSG00000140945/ENSG00000127129/ENSG00000117115/ENSG00000121966/ENSG00000126353/ENSG00000172725/ENSG00000117407/ENSG00000169429/ENSG00000108691/ENSG00000136999/ENSG00000057593/ENSG00000166949/ENSG00000130827…	THBS1/S100A14/PDGFB/CXCL12/SEMA3F/HSPB1/TMSB4X/C5AR2/DSCAM/EDN1/NRP1/SEMA5A/CDH13/EDN2/PADI2/CXCR4/CCR7/CORO1B/ARTN/CXCL8/CCL2/NOV/F7/SMAD3/PLXNA3/RARRES2/P2RX4/NOTCH1/CCL26/PLXNA4/VEGFA/DAPK2/TRPV4/FGF18/PRKD2/EFNB2/MAPK3/SERPINE1/VEGFC/NTRK3	40
BP	GO:0019915	lipid storage	19|2653	55|14725	0.00250756	0.0654868	ENSG00000160179/ENSG00000263528/ENSG00000100906/ENSG00000125730/ENSG00000214456/ENSG00000163874/ENSG00000135245/ENSG00000105974/ENSG00000126262/ENSG00000131408/ENSG00000165029/ENSG00000197296/ENSG00000110047/ENSG00000121671/ENSG00000180530/ENSG00000147872/ENSG00000073060/ENSG00000170419/ENSG00000168000	ABCG1/IKBKE/NFKBIA/C3/PLIN5/ZC3H12A/HILPDA/CAV1/FFAR2/NR1H2/ABCA1/FITM2/EHD1/CRY2/NRIP1/PLIN2/SCARB1/VSTM2A/BSCL2	19
BP	GO:0043297	apical junction assembly	20|2653	59|14725	0.00252597	0.0656635	ENSG00000165215/ENSG00000140832/ENSG00000163347/ENSG00000130545/ENSG00000124171/ENSG00000124429/ENSG00000102981/ENSG00000159216/ENSG00000164877/ENSG00000083307/ENSG00000155366/ENSG00000158769/ENSG00000071127/ENSG00000152939/ENSG00000027075/ENSG00000197879/ENSG00000150054/ENSG00000044115/ENSG00000124216/ENSG00000163251	CLDN3/MARVELD3/CLDN1/CRB3/PARD6B/POF1B/PARD6A/RUNX1/MICALL2/GRHL2/RHOC/F11R/WDR1/MARVELD2/PRKCH/MYO1C/MPP7/CTNNA1/SNAI1/FZD5	20
BP	GO:0030219	megakaryocyte differentiation	27|2653	88|14725	0.00264164	0.0681958	ENSG00000137801/ENSG00000006747/ENSG00000111679/ENSG00000278828/ENSG00000158406/ENSG00000273983/ENSG00000159216/ENSG00000161642/ENSG00000179588/ENSG00000197837/ENSG00000198890/ENSG00000274267/ENSG00000183598/ENSG00000185043/ENSG00000273542/ENSG00000270276/ENSG00000132475/ENSG00000275714/ENSG00000147883/ENSG00000274750/ENSG00000242372/ENSG00000276180/ENSG00000095752/ENSG00000170631/ENSG00000270882…	THBS1/SCIN/PTPN6/HIST1H3H/HIST1H4H/HIST1H3G/RUNX1/ZNF385A/ZFPM1/HIST4H4/PRMT6/HIST1H3B/HIST2H3D/CIB1/HIST1H4K/HIST2H4B/H3F3B/HIST1H3A/CDKN2B/HIST1H3E/EIF6/HIST1H4I/IL11/ZNF16/HIST2H4A/HIST1H3J/PRMT1	27
BP	GO:0043123	positive regulation of I-kappaB kinase/NF-kappaB signaling	43|2653	158|14725	0.00264756	0.0681958	ENSG00000145632/ENSG00000172936/ENSG00000153714/ENSG00000100097/ENSG00000263528/ENSG00000111321/ENSG00000171604/ENSG00000141574/ENSG00000130303/ENSG00000129353/ENSG00000131080/ENSG00000132256/ENSG00000121858/ENSG00000126353/ENSG00000067182/ENSG00000142208/ENSG00000155366/ENSG00000196924/ENSG00000189067/ENSG00000157593/ENSG00000187796/ENSG00000104529/ENSG00000121060/ENSG00000056972/ENSG00000023445…	PLK2/MYD88/LURAP1L/LGALS1/IKBKE/LTBR/CXXC5/SECTM1/BST2/SLC44A2/EDA2R/TRIM5/TNFSF10/CCR7/TNFRSF1A/AKT1/RHOC/FLNA/LITAF/SLC35B2/CARD9/EEF1D/TRIM25/TRAF3IP2/BIRC3/PLEKHG5/TICAM1/RNF31/TRADD/TRIM8/TNIP2/MAP3K14/UBC/IKBKG/IRF3/SHARPIN/INAVA/SHISA5/TGM2/APOL3/S100A4/RIPK2/UBE2V1	43
BP	GO:0001101	response to acid chemical	75|2653	307|14725	0.00268531	0.0688538	ENSG00000170421/ENSG00000181019/ENSG00000188064/ENSG00000107984/ENSG00000100311/ENSG00000176884/ENSG00000163347/ENSG00000101213/ENSG00000090339/ENSG00000165272/ENSG00000168542/ENSG00000010278/ENSG00000151632/ENSG00000165731/ENSG00000170430/ENSG00000171631/ENSG00000198797/ENSG00000196139/ENSG00000078401/ENSG00000100219/ENSG00000110436/ENSG00000136826/ENSG00000171522/ENSG00000131759/ENSG00000115457…	KRT8/NQO1/WNT7B/DKK1/PDGFB/GRIN1/CLDN1/PTK6/ICAM1/AQP3/COL3A1/CD9/AKR1C2/RET/MGMT/P2RY6/BRINP2/AKR1C3/EDN1/XBP1/SLC1A2/KLF4/PTGER4/RARA/IGFBP2/CYBA/ASCL1/SREBF1/RXRA/AKR1C1/PTGES/CPT1A/GSN/ZC3H12A/RPS6KB1/RARG/TH/COL18A1/ACER2/EGR1/GJB2/GJB3/CCR7/TEAD2/AKT1/KRT13/SLC10A3/FFAR2/CEBPB/LAMTOR5/LDLR/GNAS/MYB/FOLR1/ABCA1/FIS1/TLR2/CDKN1B/ASS1/PID1/F7/ALAD/BCL2L1/SH3BP4/AACS/LAMTOR1/CFL1/WNT9A/CTSH/VEG…	75
BP	GO:0006335	DNA replication-dependent nucleosome assembly	12|2653	29|14725	0.00283113	0.0712964	ENSG00000278828/ENSG00000158406/ENSG00000273983/ENSG00000197837/ENSG00000274267/ENSG00000273542/ENSG00000270276/ENSG00000275714/ENSG00000274750/ENSG00000276180/ENSG00000270882/ENSG00000197153	HIST1H3H/HIST1H4H/HIST1H3G/HIST4H4/HIST1H3B/HIST1H4K/HIST2H4B/HIST1H3A/HIST1H3E/HIST1H4I/HIST2H4A/HIST1H3J	12
BP	GO:0006692	prostanoid metabolic process	12|2653	29|14725	0.00283113	0.0712964	ENSG00000151632/ENSG00000196139/ENSG00000078401/ENSG00000106853/ENSG00000095303/ENSG00000168907/ENSG00000148344/ENSG00000127129/ENSG00000067182/ENSG00000148334/ENSG00000186526/ENSG00000161533	AKR1C2/AKR1C3/EDN1/PTGR1/PTGS1/PLA2G4F/PTGES/EDN2/TNFRSF1A/PTGES2/CYP4F8/ACOX1	12
BP	GO:0006693	prostaglandin metabolic process	12|2653	29|14725	0.00283113	0.0712964	ENSG00000151632/ENSG00000196139/ENSG00000078401/ENSG00000106853/ENSG00000095303/ENSG00000168907/ENSG00000148344/ENSG00000127129/ENSG00000067182/ENSG00000148334/ENSG00000186526/ENSG00000161533	AKR1C2/AKR1C3/EDN1/PTGR1/PTGS1/PLA2G4F/PTGES/EDN2/TNFRSF1A/PTGES2/CYP4F8/ACOX1	12
BP	GO:0034723	DNA replication-dependent nucleosome organization	12|2653	29|14725	0.00283113	0.0712964	ENSG00000278828/ENSG00000158406/ENSG00000273983/ENSG00000197837/ENSG00000274267/ENSG00000273542/ENSG00000270276/ENSG00000275714/ENSG00000274750/ENSG00000276180/ENSG00000270882/ENSG00000197153	HIST1H3H/HIST1H4H/HIST1H3G/HIST4H4/HIST1H3B/HIST1H4K/HIST2H4B/HIST1H3A/HIST1H3E/HIST1H4I/HIST2H4A/HIST1H3J	12
BP	GO:0060562	epithelial tube morphogenesis	74|2653	303|14725	0.0028778	0.0718632	ENSG00000091831/ENSG00000103067/ENSG00000184292/ENSG00000166145/ENSG00000129514/ENSG00000149418/ENSG00000107485/ENSG00000167642/ENSG00000158055/ENSG00000164690/ENSG00000121068/ENSG00000101115/ENSG00000170561/ENSG00000165731/ENSG00000082175/ENSG00000078401/ENSG00000248905/ENSG00000124145/ENSG00000168743/ENSG00000092969/ENSG00000099250/ENSG00000131759/ENSG00000125618/ENSG00000101144/ENSG00000196576…	ESR1/ESRP2/TACSTD2/SPINT1/FOXA1/ST14/GATA3/SPINT2/GRHL3/SHH/TBX2/SALL4/IRX2/RET/PGR/EDN1/FMN1/SDC4/NPNT/TGFB2/NRP1/RARA/PAX8/BMP7/PLXNB2/WNT4/SOX11/SHROOM3/SEMA4C/GRHL2/AR/LAMA5/RARG/B4GALT1/VASP/PODXL/PLXND1/TEAD2/COBL/ETV5/AREG/RHOB/VDR/MSX2/FOLR1/MYCN/EPHA2/SMAD3/OVOL2/CITED2/NDRG4/LRP5/PPP1CA/CELSR1/MESP1/ARHGAP35/NOTCH1/CTNNBIP1/CFL1/IRX3/CTSH/VEGFA/HES1/EGF/DLL4/PRKD2/DAG1/KDM5B/EFNB2/STARD…	74
BP	GO:0010975	regulation of neuron projection development	97|2653	414|14725	0.00287911	0.0718632	ENSG00000198910/ENSG00000107485/ENSG00000124126/ENSG00000143320/ENSG00000145632/ENSG00000176884/ENSG00000006327/ENSG00000185924/ENSG00000100097/ENSG00000198753/ENSG00000101213/ENSG00000124507/ENSG00000107562/ENSG00000169242/ENSG00000163220/ENSG00000001617/ENSG00000125968/ENSG00000103260/ENSG00000124839/ENSG00000171587/ENSG00000165731/ENSG00000164050/ENSG00000005884/ENSG00000136826/ENSG00000129682…	L1CAM/GATA3/PREX1/CRABP2/PLK2/GRIN1/TNFRSF12A/RTN4RL1/LGALS1/PLXNB3/PTK6/PACSIN1/CXCL12/EFNA1/S100A9/SEMA3F/ID1/METRN/RAB17/DSCAM/RET/PLXNB1/ITGA3/KLF4/FGF13/NRP1/SSH3/MAP2/SEMA5A/BMP7/PLXNB2/MAG/ARHGAP4/NRCAM/RASAL1/FSTL4/ZMYND8/ARC/EPHB3/OLFM1/ULK2/SCN1B/CERS2/PLXND1/ENC1/CAMK2B/FOXO6/AKT1/PPP3CA/COBL/MYLIP/KIAA0319/FN1/CUX1/CIB1/PMP22/VIM/KLK6/NGFR/ITPKA/SNAP25/PLXNA3/NDRG4/CTTN/SS18L1/STX1B/A…	97
BP	GO:0051291	protein heterooligomerization	32|2653	110|14725	0.00291778	0.0721895	ENSG00000165215/ENSG00000176884/ENSG00000163347/ENSG00000278828/ENSG00000158406/ENSG00000173801/ENSG00000273983/ENSG00000197837/ENSG00000182718/ENSG00000104447/ENSG00000096433/ENSG00000274267/ENSG00000023445/ENSG00000184640/ENSG00000273542/ENSG00000270276/ENSG00000102871/ENSG00000275714/ENSG00000133466/ENSG00000172765/ENSG00000044115/ENSG00000274750/ENSG00000197747/ENSG00000276180/ENSG00000177885…	CLDN3/GRIN1/CLDN1/HIST1H3H/HIST1H4H/JUP/HIST1H3G/HIST4H4/ANXA2/TRPS1/ITPR3/HIST1H3B/BIRC3/SEPT9/HIST1H4K/HIST2H4B/TRADD/HIST1H3A/C1QTNF6/TMCC1/CTNNA1/HIST1H3E/S100A10/HIST1H4I/GRB2/SQSTM1/HRAS/TMEM120A/MCCC1/HIST2H4A/GCH1/HIST1H3J	32
BP	GO:1905952	regulation of lipid localization	32|2653	110|14725	0.00291778	0.0721895	ENSG00000137801/ENSG00000164690/ENSG00000160179/ENSG00000263528/ENSG00000144452/ENSG00000078401/ENSG00000101188/ENSG00000100906/ENSG00000125730/ENSG00000214456/ENSG00000153246/ENSG00000163874/ENSG00000182718/ENSG00000107331/ENSG00000135245/ENSG00000163932/ENSG00000142208/ENSG00000131408/ENSG00000118513/ENSG00000165029/ENSG00000204624/ENSG00000197296/ENSG00000135124/ENSG00000110047/ENSG00000121671…	THBS1/SHH/ABCG1/IKBKE/ABCA12/EDN1/NTSR1/NFKBIA/C3/PLIN5/PLA2R1/ZC3H12A/ANXA2/ABCA2/HILPDA/PRKCD/AKT1/NR1H2/MYB/ABCA1/DISP3/FITM2/P2RX4/EHD1/CRY2/LAMTOR1/EGF/KDM5B/AKT2/SCARB1/VSTM2A/REN	32
BP	GO:0034728	nucleosome organization	41|2653	150|14725	0.00301147	0.0737197	ENSG00000180543/ENSG00000184678/ENSG00000273802/ENSG00000158373/ENSG00000278828/ENSG00000158406/ENSG00000180596/ENSG00000273983/ENSG00000124635/ENSG00000275713/ENSG00000197903/ENSG00000203814/ENSG00000197837/ENSG00000277224/ENSG00000108604/ENSG00000274267/ENSG00000187837/ENSG00000183598/ENSG00000273542/ENSG00000122390/ENSG00000270276/ENSG00000132475/ENSG00000188375/ENSG00000275714/ENSG00000124575…	TSPYL5/HIST2H2BE/HIST1H2BG/HIST1H2BD/HIST1H3H/HIST1H4H/HIST1H2BC/HIST1H3G/HIST1H2BJ/HIST1H2BH/HIST1H2BK/HIST2H2BF/HIST4H4/HIST1H2BF/SMARCD2/HIST1H3B/HIST1H1C/HIST2H3D/HIST1H4K/NAA60/HIST2H4B/H3F3B/H3F3C/HIST1H3A/HIST1H1D/HIST1H2BN/BRDT/HIST1H2BL/CHD5/HIST1H2BE/HIST1H3E/HIST1H2BI/H2AFX/HIST3H2A/TSPYL4/HIST1H4I/CENPX/HIST1H2BO/HIST2H4A/ARID2/HIST1H3J	41
BP	GO:0031349	positive regulation of defense response	87|2653	366|14725	0.00301249	0.0737197	ENSG00000091831/ENSG00000189334/ENSG00000095261/ENSG00000118640/ENSG00000172936/ENSG00000115267/ENSG00000117983/ENSG00000263528/ENSG00000163220/ENSG00000138496/ENSG00000050628/ENSG00000172551/ENSG00000163636/ENSG00000171522/ENSG00000100906/ENSG00000125730/ENSG00000125999/ENSG00000051523/ENSG00000188372/ENSG00000161031/ENSG00000172243/ENSG00000164430/ENSG00000255690/ENSG00000185499/ENSG00000132256…	ESR1/S100A14/PSMD5/VAMP8/MYD88/IFIH1/MUC5B/IKBKE/S100A9/PARP9/PTGER3/MUCL1/PSMD6/PTGER4/NFKBIA/C3/BPIFB1/CYBA/ZP3/PGLYRP2/CLEC7A/CGAS/TRIL/MUC1/TRIM5/RELB/S100A8/PSMB10/MUC3A/CAV1/CCR7/PRKCD/TNFRSF1A/NECTIN2/FFAR2/ITGAM/OSMR/MAPKAPK2/LDLR/CARD9/IL17RC/TMEM173/TLR2/BIRC3/HCK/TICAM1/RFTN1/CNPY3/SLC25A6/UNC93B1/PSME1/LRSAM1/CD47/PSMA7/NPY5R/TNIP2/IL17D/IRF1/RSAD2/PSMC5/RASGRP1/F12/NR1D1/TRPV4/UBC/IK…	87
BP	GO:0070252	actin-mediated cell contraction	28|2653	93|14725	0.00301884	0.0737197	ENSG00000159167/ENSG00000173801/ENSG00000162989/ENSG00000055118/ENSG00000130529/ENSG00000090020/ENSG00000213853/ENSG00000105711/ENSG00000159173/ENSG00000115109/ENSG00000105974/ENSG00000080709/ENSG00000140416/ENSG00000196924/ENSG00000026025/ENSG00000057294/ENSG00000092841/ENSG00000198929/ENSG00000130598/ENSG00000171385/ENSG00000183230/ENSG00000096696/ENSG00000197702/ENSG00000127831/ENSG00000157388…	STC1/JUP/KCNJ3/KCNH2/TRPM4/SLC9A1/EMP2/SCN1B/TNNI1/EPB41L5/CAV1/KCNN2/TPM1/FLNA/VIM/PKP2/MYL6/NOS1AP/TNNI2/KCND3/CTNNA3/DSP/PARVA/VIL1/CACNA1D/NEDD4L/FGF12/TPM4	28
BP	GO:0003013	circulatory system process	105|2653	454|14725	0.00306812	0.0739368	ENSG00000075461/ENSG00000138119/ENSG00000089356/ENSG00000099337/ENSG00000100311/ENSG00000124249/ENSG00000102683/ENSG00000159167/ENSG00000074370/ENSG00000121068/ENSG00000116016/ENSG00000107562/ENSG00000090339/ENSG00000175591/ENSG00000183044/ENSG00000168398/ENSG00000173801/ENSG00000164128/ENSG00000162989/ENSG00000055118/ENSG00000078401/ENSG00000184845/ENSG00000270885/ENSG00000095303/ENSG00000128165…	CACNG4/MYOF/FXYD3/KCNK6/PDGFB/KCNK15/SGCG/STC1/ATP2A3/TBX2/EPAS1/CXCL12/ICAM1/P2RY2/ABAT/BDKRB2/JUP/NPY1R/KCNJ3/KCNH2/EDN1/DRD1/RASL10B/PTGS1/ADM2/NTSR1/CACNA1H/TGFB2/TRPM4/CHRM1/NPR3/RNLS/CACNB3/CYBA/GPER1/SREBF1/P2RX2/RAMP3/ZC3H12A/AR/SLC9A1/TH/PPP1R13L/EMP2/SMTN/SCN1B/TNNI1/HTR1D/EDN2/ATP1B1/PLOD3/CAV1/ITPR3/AKT1/KCNN2/TPM1/PTPRJ/FLNA/C9orf3/F11R/ADRA2B/IRX5/KCNK1/SMAD3/HSD11B2/KCNK3/PKP2/NR2F…	105
BP	GO:0007045	cell-substrate adherens junction assembly	22|2653	68|14725	0.00307489	0.0739368	ENSG00000137801/ENSG00000189058/ENSG00000141376/ENSG00000173156/ENSG00000248905/ENSG00000124145/ENSG00000099250/ENSG00000162552/ENSG00000090020/ENSG00000130702/ENSG00000115109/ENSG00000158856/ENSG00000149177/ENSG00000087077/ENSG00000166949/ENSG00000152894/ENSG00000085733/ENSG00000076826/ENSG00000072110/ENSG00000112715/ENSG00000197747/ENSG00000084636	THBS1/APOD/BCAS3/RHOD/FMN1/SDC4/NRP1/WNT4/SLC9A1/LAMA5/EPB41L5/DMTN/PTPRJ/TRIP6/SMAD3/PTPRK/CTTN/CAMSAP3/ACTN1/VEGFA/S100A10/COL16A1	22
BP	GO:0048041	focal adhesion assembly	22|2653	68|14725	0.00307489	0.0739368	ENSG00000137801/ENSG00000189058/ENSG00000141376/ENSG00000173156/ENSG00000248905/ENSG00000124145/ENSG00000099250/ENSG00000162552/ENSG00000090020/ENSG00000130702/ENSG00000115109/ENSG00000158856/ENSG00000149177/ENSG00000087077/ENSG00000166949/ENSG00000152894/ENSG00000085733/ENSG00000076826/ENSG00000072110/ENSG00000112715/ENSG00000197747/ENSG00000084636	THBS1/APOD/BCAS3/RHOD/FMN1/SDC4/NRP1/WNT4/SLC9A1/LAMA5/EPB41L5/DMTN/PTPRJ/TRIP6/SMAD3/PTPRK/CTTN/CAMSAP3/ACTN1/VEGFA/S100A10/COL16A1	22
BP	GO:0050918	positive chemotaxis	17|2653	48|14725	0.00308016	0.0739368	ENSG00000100311/ENSG00000131981/ENSG00000198753/ENSG00000107562/ENSG00000099250/ENSG00000112902/ENSG00000140945/ENSG00000102879/ENSG00000117407/ENSG00000149177/ENSG00000169429/ENSG00000057593/ENSG00000166949/ENSG00000136235/ENSG00000112715/ENSG00000150630/ENSG00000140538	PDGFB/LGALS3/PLXNB3/CXCL12/NRP1/SEMA5A/CDH13/CORO1A/ARTN/PTPRJ/CXCL8/F7/SMAD3/GPNMB/VEGFA/VEGFC/NTRK3	17
BP	GO:0045926	negative regulation of growth	53|2653	205|14725	0.00310479	0.0742123	ENSG00000165140/ENSG00000172936/ENSG00000101213/ENSG00000140961/ENSG00000001617/ENSG00000047644/ENSG00000124762/ENSG00000160211/ENSG00000185386/ENSG00000130303/ENSG00000129682/ENSG00000092969/ENSG00000099250/ENSG00000113739/ENSG00000112902/ENSG00000082482/ENSG00000105695/ENSG00000113916/ENSG00000089820/ENSG00000115461/ENSG00000053108/ENSG00000134533/ENSG00000083290/ENSG00000125148/ENSG00000167565…	FBP1/MYD88/PTK6/OSGIN1/SEMA3F/WWC3/CDKN1A/G6PD/MAPK11/BST2/FGF13/TGFB2/NRP1/STC2/SEMA5A/KCNK2/MAG/BCL6/ARHGAP4/IGFBP5/FSTL4/RERG/ULK2/MT2A/SERTAD3/PTPRJ/BBC3/GNAS/ADAM15/SERTAD1/CDKN1B/CDHR2/NOV/SMAD3/CITED2/PLXNA3/RAI1/SH3BP4/WWC1/NOTCH1/APBB2/RNF6/MIR25/OSGIN2/RTN4R/SQSTM1/INHBA/DNAJB2/ADIPOR2/JARID2/MT1F/CGA/BDKRB1	53
BP	GO:0007264	small GTPase mediated signal transduction	108|2653	469|14725	0.00312443	0.074234	ENSG00000165140/ENSG00000205336/ENSG00000124126/ENSG00000145632/ENSG00000177106/ENSG00000125637/ENSG00000168542/ENSG00000173156/ENSG00000127084/ENSG00000142675/ENSG00000124762/ENSG00000131037/ENSG00000130762/ENSG00000142632/ENSG00000112379/ENSG00000005884/ENSG00000185386/ENSG00000008323/ENSG00000092969/ENSG00000099250/ENSG00000140945/ENSG00000113916/ENSG00000089820/ENSG00000135905/ENSG00000111344…	FBP1/ADGRG1/PREX1/PLK2/EPS8L2/PSD4/COL3A1/RHOD/FGD3/CNKSR1/CDKN1A/EPS8L1/ARHGEF16/ARHGEF19/ARFGEF3/ITGA3/MAPK11/PLEKHG6/TGFB2/NRP1/CDH13/BCL6/ARHGAP4/DOCK10/RASAL1/SPATA13/ARHGEF5/RND1/RGL3/RERG/DOCK8/RHOV/-/RAP1GAP/ARHGEF10L/-/RRAS/SIAH2/SRGAP1/RHOC/RHOB/MAPKAPK2/BCAR3/ARHGEF37/RASA3/WAS/SH2D3A/ABCA1/-/VAV2/PLEKHG5/PAK4/ARHGEF28/ARHGEF17/CYTH2/NGFR/MCF2L/-/ABR/ARHGAP1/MADD/DOCK2/CELSR1/ARHGAP39/…	108
BP	GO:0032103	positive regulation of response to external stimulus	56|2653	219|14725	0.00313202	0.074234	ENSG00000137801/ENSG00000189334/ENSG00000100311/ENSG00000118640/ENSG00000172936/ENSG00000107562/ENSG00000178726/ENSG00000163220/ENSG00000106211/ENSG00000205542/ENSG00000050628/ENSG00000171587/ENSG00000078401/ENSG00000171522/ENSG00000099250/ENSG00000100906/ENSG00000125730/ENSG00000112902/ENSG00000051523/ENSG00000140945/ENSG00000188372/ENSG00000143546/ENSG00000127129/ENSG00000126353/ENSG00000067182…	THBS1/S100A14/PDGFB/VAMP8/MYD88/CXCL12/THBD/S100A9/HSPB1/TMSB4X/PTGER3/DSCAM/EDN1/PTGER4/NRP1/NFKBIA/C3/SEMA5A/CYBA/CDH13/ZP3/S100A8/EDN2/CCR7/TNFRSF1A/FFAR2/ARTN/OSMR/CXCL8/LDLR/IL17RC/TLR2/TICAM1/F7/SMAD3/RARRES2/LRSAM1/CD47/P2RX4/NPY5R/CCL26/IL17D/F12/VEGFA/DAPK2/TRPV4/FGF18/ADAM8/PRKD2/TGM2/DHX58/MAPK3/RIPK2/SERPINE1/VEGFC/NTRK3	56
BP	GO:0043330	response to exogenous dsRNA	13|2653	33|14725	0.00321325	0.0758408	ENSG00000115267/ENSG00000100906/ENSG00000164430/ENSG00000105974/ENSG00000187796/ENSG00000184584/ENSG00000168003/ENSG00000127666/ENSG00000131378/ENSG00000179583/ENSG00000126456/ENSG00000102882/ENSG00000104312	IFIH1/NFKBIA/CGAS/CAV1/CARD9/TMEM173/SLC3A2/TICAM1/RFTN1/CIITA/IRF3/MAPK3/RIPK2	13
BP	GO:0051961	negative regulation of nervous system development	64|2653	257|14725	0.00329492	0.0774443	ENSG00000205336/ENSG00000145632/ENSG00000164690/ENSG00000185924/ENSG00000100097/ENSG00000169242/ENSG00000168542/ENSG00000001617/ENSG00000125968/ENSG00000170075/ENSG00000134595/ENSG00000178568/ENSG00000183734/ENSG00000129682/ENSG00000099250/ENSG00000112902/ENSG00000101144/ENSG00000185737/ENSG00000139352/ENSG00000176887/ENSG00000105695/ENSG00000089820/ENSG00000182054/ENSG00000053108/ENSG00000083290…	ADGRG1/PLK2/SHH/RTN4RL1/LGALS1/EFNA1/COL3A1/SEMA3F/ID1/GPR37L1/SOX3/ERBB4/ASCL2/FGF13/NRP1/SEMA5A/BMP7/NRG3/ASCL1/SOX11/MAG/ARHGAP4/IDH2/FSTL4/ULK2/GPR173/CERS2/RAP1GAP/NOTCH3/PPP3CA/SLIT1/MYLIP/LDLR/KIAA0319/MYCN/TLR2/C16orf45/CIB1/PMP22/JAG1/VIM/CTDSP1/NGFR/CHRD/PLXNA3/DISP3/STX1B/TNFRSF21/NOTCH1/IRX3/RNF6/CTNNA1/ZHX2/HES1/TRPC6/TRPV4/ADCY6/RTN4R/KCTD11/EFNB2/INPP5J/IFT122/NTRK3/GAK	64
BP	GO:0006342	chromatin silencing	29|2653	98|14725	0.00340507	0.0795403	ENSG00000180573/ENSG00000278828/ENSG00000158406/ENSG00000246705/ENSG00000196787/ENSG00000273983/ENSG00000196747/ENSG00000277075/ENSG00000170836/ENSG00000197837/ENSG00000184260/ENSG00000274267/ENSG00000183598/ENSG00000276368/ENSG00000273542/ENSG00000270276/ENSG00000272196/ENSG00000132475/ENSG00000203812/ENSG00000275714/ENSG00000276903/ENSG00000274750/ENSG00000182095/ENSG00000188486/ENSG00000181218…	HIST1H2AC/HIST1H3H/HIST1H4H/H2AFJ/HIST1H2AG/HIST1H3G/HIST1H2AI/HIST1H2AE/PPM1D/HIST4H4/HIST2H2AC/HIST1H3B/HIST2H3D/HIST1H2AJ/HIST1H4K/HIST2H4B/HIST2H2AA4/H3F3B/HIST2H2AA3/HIST1H3A/HIST1H2AL/HIST1H3E/TNRC18/H2AFX/HIST3H2A/HIST1H4I/HIST2H2AB/HIST2H4A/HIST1H3J	29
BP	GO:0060512	prostate gland morphogenesis	11|2653	26|14725	0.00342639	0.0795403	ENSG00000091831/ENSG00000129514/ENSG00000164690/ENSG00000101144/ENSG00000186350/ENSG00000073282/ENSG00000169083/ENSG00000172819/ENSG00000213145/ENSG00000206075/ENSG00000148400	ESR1/FOXA1/SHH/BMP7/RXRA/TP63/AR/RARG/CRIP1/SERPINB5/NOTCH1	11
BP	GO:0090314	positive regulation of protein targeting to membrane	11|2653	26|14725	0.00342639	0.0795403	ENSG00000170379/ENSG00000169896/ENSG00000174827/ENSG00000103888/ENSG00000214253/ENSG00000185043/ENSG00000197879/ENSG00000177427/ENSG00000105221/ENSG00000141736/ENSG00000198420	TCAF2/ITGAM/PDZK1/CEMIP/FIS1/CIB1/MYO1C/MIEF2/AKT2/ERBB2/TCAF1	11
BP	GO:0031076	embryonic camera-type eye development	14|2653	37|14725	0.00350555	0.0795723	ENSG00000121068/ENSG00000131759/ENSG00000101144/ENSG00000176887/ENSG00000163349/ENSG00000172819/ENSG00000180176/ENSG00000104881/ENSG00000184254/ENSG00000137868/ENSG00000137203/ENSG00000164442/ENSG00000132688/ENSG00000163251	TBX2/RARA/BMP7/SOX11/HIPK1/RARG/TH/PPP1R13L/ALDH1A3/STRA6/TFAP2A/CITED2/NES/FZD5	14
BP	GO:0008015	blood circulation	104|2653	451|14725	0.00352093	0.0795723	ENSG00000075461/ENSG00000138119/ENSG00000089356/ENSG00000099337/ENSG00000100311/ENSG00000124249/ENSG00000102683/ENSG00000159167/ENSG00000074370/ENSG00000121068/ENSG00000116016/ENSG00000107562/ENSG00000090339/ENSG00000175591/ENSG00000183044/ENSG00000168398/ENSG00000173801/ENSG00000164128/ENSG00000162989/ENSG00000055118/ENSG00000078401/ENSG00000184845/ENSG00000270885/ENSG00000095303/ENSG00000128165…	CACNG4/MYOF/FXYD3/KCNK6/PDGFB/KCNK15/SGCG/STC1/ATP2A3/TBX2/EPAS1/CXCL12/ICAM1/P2RY2/ABAT/BDKRB2/JUP/NPY1R/KCNJ3/KCNH2/EDN1/DRD1/RASL10B/PTGS1/ADM2/NTSR1/CACNA1H/TGFB2/TRPM4/CHRM1/NPR3/RNLS/CACNB3/CYBA/GPER1/SREBF1/P2RX2/ZC3H12A/AR/SLC9A1/TH/PPP1R13L/EMP2/SMTN/SCN1B/TNNI1/HTR1D/EDN2/ATP1B1/PLOD3/CAV1/ITPR3/AKT1/KCNN2/TPM1/PTPRJ/FLNA/C9orf3/F11R/ADRA2B/IRX5/KCNK1/SMAD3/HSD11B2/KCNK3/PKP2/NR2F2/ABR/…	104
BP	GO:0042035	regulation of cytokine biosynthetic process	24|2653	77|14725	0.00354013	0.0795723	ENSG00000137801/ENSG00000107485/ENSG00000163083/ENSG00000069399/ENSG00000172936/ENSG00000106211/ENSG00000128016/ENSG00000136826/ENSG00000179588/ENSG00000120738/ENSG00000123999/ENSG00000172216/ENSG00000123609/ENSG00000185187/ENSG00000162889/ENSG00000187796/ENSG00000127666/ENSG00000115009/ENSG00000125347/ENSG00000103855/ENSG00000197272/ENSG00000126456/ENSG00000122641/ENSG00000069020	THBS1/GATA3/INHBB/BCL3/MYD88/HSPB1/ZFP36/KLF4/ZFPM1/EGR1/INHA/CEBPB/NMI/SIGIRR/MAPKAPK2/CARD9/TICAM1/CCL20/IRF1/CD276/IL27/IRF3/INHBA/MAST4	24
BP	GO:0044706	multi-multicellular organism process	51|2653	197|14725	0.00356399	0.0795723	ENSG00000091831/ENSG00000189143/ENSG00000159167/ENSG00000171223/ENSG00000178726/ENSG00000113494/ENSG00000182195/ENSG00000082175/ENSG00000005884/ENSG00000078401/ENSG00000170345/ENSG00000113739/ENSG00000131759/ENSG00000115457/ENSG00000162552/ENSG00000010704/ENSG00000186350/ENSG00000007866/ENSG00000115461/ENSG00000169083/ENSG00000140465/ENSG00000086062/ENSG00000213853/ENSG00000123572/ENSG00000117394…	ESR1/CLDN4/STC1/JUNB/THBD/PRLR/LDOC1/PGR/ITGA3/EDN1/FOS/STC2/RARA/IGFBP2/WNT4/HFE/RXRA/TEAD3/IGFBP5/AR/CYP1A1/B4GALT1/EMP2/NRK/SLC2A1/GJB2/PSG9/AKT1/MMP9/VDR/GNAS/ADRA2B/TGFB3/VMP1/COMT/HSD11B2/CITED2/AMBP/NR2F2/MAFF/FOSL1/SLC38A1/CST3/LIF/ADRA2C/PLA2G4C/ARHGDIB/COL16A1/ADIPOR2/DDR1/CTSB	51
BP	GO:0045653	negative regulation of megakaryocyte differentiation	8|2653	16|14725	0.00356623	0.0795723	ENSG00000158406/ENSG00000197837/ENSG00000185043/ENSG00000273542/ENSG00000270276/ENSG00000276180/ENSG00000270882/ENSG00000126457	HIST1H4H/HIST4H4/CIB1/HIST1H4K/HIST2H4B/HIST1H4I/HIST2H4A/PRMT1	8
BP	GO:0048841	regulation of axon extension involved in axon guidance	8|2653	16|14725	0.00356623	0.0795723	ENSG00000107562/ENSG00000001617/ENSG00000171587/ENSG00000099250/ENSG00000112902/ENSG00000130827/ENSG00000221866/ENSG00000112715	CXCL12/SEMA3F/DSCAM/NRP1/SEMA5A/PLXNA3/PLXNA4/VEGFA	8
BP	GO:0002791	regulation of peptide secretion	88|2653	373|14725	0.00357821	0.0795723	ENSG00000107485/ENSG00000163083/ENSG00000119714/ENSG00000115267/ENSG00000073350/ENSG00000163220/ENSG00000205542/ENSG00000183044/ENSG00000011347/ENSG00000134830/ENSG00000197971/ENSG00000100219/ENSG00000185386/ENSG00000169047/ENSG00000087085/ENSG00000270885/ENSG00000170745/ENSG00000145103/ENSG00000173175/ENSG00000171522/ENSG00000092969/ENSG00000130529/ENSG00000125618/ENSG00000104783/ENSG00000007384…	GATA3/INHBB/GPR68/IFIH1/LLGL2/S100A9/TMSB4X/ABAT/SYT7/C5AR2/MBP/XBP1/MAPK11/IRS1/ACHE/RASL10B/KCNS3/ILDR1/ADCY5/PTGER4/TGFB2/TRPM4/PAX8/KCNN4/RHBDF1/GPER1/SREBF1/HFE/IDH2/VTCN1/CPT1A/ZC3H12A/ICA1/SLC2A1/S100A8/BANK1/ITPR3/CCR7/PPP3CA/FFAR2/KISS1/TFR2/GNAS/NR1H2/IL17RC/HCAR2/TGFB3/FN1/TLR2/NOV/HLA-DRB1/STX1A/SLC25A6/SNAP25/ANXA4/PFKL/SCAMP5/LRP5/MIDN/AACS/TNFRSF21/HK1/PIM3/ITPR1/RSAD2/RASGRP1/PHPT…	88
BP	GO:0045652	regulation of megakaryocyte differentiation	23|2653	73|14725	0.00365598	0.0795723	ENSG00000137801/ENSG00000006747/ENSG00000278828/ENSG00000158406/ENSG00000273983/ENSG00000159216/ENSG00000179588/ENSG00000197837/ENSG00000198890/ENSG00000274267/ENSG00000183598/ENSG00000185043/ENSG00000273542/ENSG00000270276/ENSG00000132475/ENSG00000275714/ENSG00000274750/ENSG00000242372/ENSG00000276180/ENSG00000170631/ENSG00000270882/ENSG00000197153/ENSG00000126457	THBS1/SCIN/HIST1H3H/HIST1H4H/HIST1H3G/RUNX1/ZFPM1/HIST4H4/PRMT6/HIST1H3B/HIST2H3D/CIB1/HIST1H4K/HIST2H4B/H3F3B/HIST1H3A/HIST1H3E/EIF6/HIST1H4I/ZNF16/HIST2H4A/HIST1H3J/PRMT1	23
BP	GO:0006959	humoral immune response	40|2653	147|14725	0.00365965	0.0795723	ENSG00000107485/ENSG00000184678/ENSG00000069399/ENSG00000111679/ENSG00000273802/ENSG00000163220/ENSG00000143502/ENSG00000134830/ENSG00000180596/ENSG00000130303/ENSG00000125730/ENSG00000125999/ENSG00000124635/ENSG00000148346/ENSG00000197903/ENSG00000188372/ENSG00000078898/ENSG00000161031/ENSG00000277224/ENSG00000018280/ENSG00000143546/ENSG00000205220/ENSG00000120885/ENSG00000126353/ENSG00000108691…	GATA3/HIST2H2BE/BCL3/PTPN6/HIST1H2BG/S100A9/SUSD4/C5AR2/HIST1H2BC/BST2/C3/BPIFB1/HIST1H2BJ/LCN2/HIST1H2BK/ZP3/BPIFB2/PGLYRP2/HIST1H2BF/SLC11A1/S100A8/PSMB10/CLU/CCR7/CCL2/BLNK/TRAF3IP2/PAX5/HLA-DRB1/RARRES2/BPIFA2/TNFRSF21/NOTCH1/HIST1H2BE/SERPING1/ATOX1/HIST1H2BI/RPL30/SPNS2/PGLYRP4	40
BP	GO:0002934	desmosome organization	6|2653	10|14725	0.00367531	0.0795723	ENSG00000184363/ENSG00000173801/ENSG00000134317/ENSG00000110400/ENSG00000057294/ENSG00000096696	PKP3/JUP/GRHL1/NECTIN1/PKP2/DSP	6
BP	GO:0005984	disaccharide metabolic process	6|2653	10|14725	0.00367531	0.0795723	ENSG00000165140/ENSG00000086062/ENSG00000117394/ENSG00000127415/ENSG00000171298/ENSG00000130957	FBP1/B4GALT1/SLC2A1/IDUA/GAA/FBP2	6
BP	GO:0007342	fusion of sperm to egg plasma membrane involved in single fertilization	6|2653	10|14725	0.00367531	0.0795723	ENSG00000010278/ENSG00000255346/ENSG00000258484/ENSG00000188488/ENSG00000182310/ENSG00000171722	CD9/NOX5/SPESP1/SERPINA5/SPACA6/SPATA46	6
BP	GO:0032352	positive regulation of hormone metabolic process	6|2653	10|14725	0.00367531	0.0795723	ENSG00000107485/ENSG00000125618/ENSG00000162552/ENSG00000120738/ENSG00000105707/ENSG00000127948	GATA3/PAX8/WNT4/EGR1/HPN/POR	6
BP	GO:0043568	positive regulation of insulin-like growth factor receptor signaling pathway	6|2653	10|14725	0.00367531	0.0795723	ENSG00000062038/ENSG00000146674/ENSG00000141753/ENSG00000115461/ENSG00000169083/ENSG00000164976	CDH3/IGFBP3/IGFBP4/IGFBP5/AR/MYORG	6
BP	GO:0060600	dichotomous subdivision of an epithelial terminal unit	6|2653	10|14725	0.00367531	0.0795723	ENSG00000075223/ENSG00000099250/ENSG00000004399/ENSG00000109321/ENSG00000075275/ENSG00000103811	SEMA3C/NRP1/PLXND1/AREG/CELSR1/CTSH	6
BP	GO:0001666	response to hypoxia	78|2653	325|14725	0.0036848	0.0795723	ENSG00000137801/ENSG00000165215/ENSG00000129993/ENSG00000095261/ENSG00000159167/ENSG00000116016/ENSG00000107562/ENSG00000167772/ENSG00000198125/ENSG00000090339/ENSG00000165272/ENSG00000183044/ENSG00000183734/ENSG00000078401/ENSG00000163636/ENSG00000092969/ENSG00000113739/ENSG00000101144/ENSG00000082482/ENSG00000051523/ENSG00000187848/ENSG00000160789/ENSG00000090020/ENSG00000140465/ENSG00000140939…	THBS1/CLDN3/CBFA2T3/PSMD5/STC1/EPAS1/CXCL12/ANGPTL4/MB/ICAM1/AQP3/ABAT/ASCL2/EDN1/PSMD6/TGFB2/STC2/BMP7/KCNK2/CYBA/P2RX2/LMNA/SLC9A1/CYP1A1/NOL3/TH/EGLN3/EGR1/NR4A2/PSMB10/ATP1B1/HILPDA/CXCR4/CAV1/ZFP36L1/AKT1/BBC3/MYB/TGFB3/DDIT4/FIS1/TLR2/CDKN1B/F7/SMAD3/HSD11B2/CITED2/VASN/KCNK3/PSME1/ALAD/CA9/SOD3/PSMA7/NOTCH1/ITPR1/PSMC5/LOXL2/VEGFA/CST3/TRPC6/UBC/PSME2/ADAM8/TMBIM6/ELOB/PSMD4/EGLN2/PKM/HMOX…	78
BP	GO:0010632	regulation of epithelial cell migration	52|2653	202|14725	0.00371182	0.0795723	ENSG00000137801/ENSG00000184292/ENSG00000107485/ENSG00000132698/ENSG00000100311/ENSG00000145632/ENSG00000140832/ENSG00000159167/ENSG00000141376/ENSG00000169242/ENSG00000106211/ENSG00000138772/ENSG00000205542/ENSG00000173801/ENSG00000005884/ENSG00000078401/ENSG00000136826/ENSG00000092969/ENSG00000099250/ENSG00000067066/ENSG00000112902/ENSG00000168874/ENSG00000196189/ENSG00000163874/ENSG00000213853…	THBS1/TACSTD2/GATA3/RAB25/PDGFB/PLK2/MARVELD3/STC1/BCAS3/EFNA1/HSPB1/ANXA3/TMSB4X/JUP/ITGA3/EDN1/KLF4/TGFB2/NRP1/SP100/SEMA5A/ATOH8/SEMA4A/ZC3H12A/EMP2/STAT5A/EPB41L5/AKT1/MMP9/RHOB/CIB1/EPHA2/NR2F2/BCAR1/P2RX4/NOTCH1/PDCD6/CTSH/VEGFA/VIL1/PLCG1/FGF18/MIR200A/DLL4/DAB2IP/PRKD2/SCARB1/ADGRB1/STARD13/HDAC7/DOCK5/VEGFC	52
BP	GO:0006690	icosanoid metabolic process	27|2653	90|14725	0.00374652	0.0795723	ENSG00000161905/ENSG00000138061/ENSG00000151632/ENSG00000074416/ENSG00000196139/ENSG00000078401/ENSG00000106853/ENSG00000095303/ENSG00000168907/ENSG00000167741/ENSG00000148344/ENSG00000140465/ENSG00000117480/ENSG00000100078/ENSG00000127129/ENSG00000067182/ENSG00000171954/ENSG00000162889/ENSG00000137462/ENSG00000165591/ENSG00000255974/ENSG00000148334/ENSG00000105499/ENSG00000186526/ENSG00000161533…	ALOX15/CYP1B1/AKR1C2/MGLL/AKR1C3/EDN1/PTGR1/PTGS1/PLA2G4F/GGT6/PTGES/CYP1A1/FAAH/PLA2G3/EDN2/TNFRSF1A/CYP4F22/MAPKAPK2/TLR2/FAAH2/CYP2A6/PTGES2/PLA2G4C/CYP4F8/ACOX1/MAPK3/GPX4	27
BP	GO:0030322	stabilization of membrane potential	7|2653	13|14725	0.0037946	0.0795723	ENSG00000099337/ENSG00000124249/ENSG00000104783/ENSG00000082482/ENSG00000184261/ENSG00000135750/ENSG00000171303	KCNK6/KCNK15/KCNN4/KCNK2/KCNK12/KCNK1/KCNK3	7
BP	GO:0032802	low-density lipoprotein particle receptor catabolic process	7|2653	13|14725	0.0037946	0.0795723	ENSG00000182718/ENSG00000007944/ENSG00000140564/ENSG00000161203/ENSG00000042753/ENSG00000147852/ENSG00000141367	ANXA2/MYLIP/FURIN/AP2M1/AP2S1/VLDLR/CLTC	7
BP	GO:0046597	negative regulation of viral entry into host cell	7|2653	13|14725	0.0037946	0.0795723	ENSG00000142089/ENSG00000148180/ENSG00000132256/ENSG00000185201/ENSG00000121060/ENSG00000185885/ENSG00000171206	IFITM3/GSN/TRIM5/IFITM2/TRIM25/IFITM1/TRIM8	7
BP	GO:0072148	epithelial cell fate commitment	7|2653	13|14725	0.0037946	0.0795723	ENSG00000099250/ENSG00000131759/ENSG00000004848/ENSG00000184916/ENSG00000185551/ENSG00000148400/ENSG00000114315	NRP1/RARA/ARX/JAG2/NR2F2/NOTCH1/HES1	7
BP	GO:0072216	positive regulation of metanephros development	7|2653	13|14725	0.0037946	0.0795723	ENSG00000100311/ENSG00000176788/ENSG00000165731/ENSG00000125618/ENSG00000197461/ENSG00000120738/ENSG00000128342	PDGFB/BASP1/RET/PAX8/PDGFA/EGR1/LIF	7
BP	GO:0098719	sodium ion import across plasma membrane	7|2653	13|14725	0.0037946	0.0795723	ENSG00000130529/ENSG00000115616/ENSG00000099822/ENSG00000090020/ENSG00000065923/ENSG00000180251/ENSG00000138622	TRPM4/SLC9A2/HCN2/SLC9A1/SLC9A7/SLC9A4/HCN4	7
BP	GO:0098911	regulation of ventricular cardiac muscle cell action potential	7|2653	13|14725	0.0037946	0.0795723	ENSG00000173801/ENSG00000130529/ENSG00000105974/ENSG00000057294/ENSG00000198929/ENSG00000183230/ENSG00000096696	JUP/TRPM4/CAV1/PKP2/NOS1AP/CTNNA3/DSP	7
BP	GO:0002521	leukocyte differentiation	94|2653	403|14725	0.00379537	0.0795723	ENSG00000107485/ENSG00000124126/ENSG00000129993/ENSG00000069399/ENSG00000111679/ENSG00000119714/ENSG00000164690/ENSG00000100097/ENSG00000171223/ENSG00000124813/ENSG00000111321/ENSG00000100867/ENSG00000156127/ENSG00000106003/ENSG00000101096/ENSG00000179388/ENSG00000100219/ENSG00000159216/ENSG00000175505/ENSG00000171522/ENSG00000170345/ENSG00000131759/ENSG00000180694/ENSG00000197046/ENSG00000160685…	GATA3/PREX1/CBFA2T3/BCL3/PTPN6/GPR68/SHH/LGALS1/JUNB/RUNX2/LTBR/DHRS2/BATF/LFNG/NFATC2/EGR3/XBP1/RUNX1/CLCF1/PTGER4/FOS/RARA/TMEM64/SIGLEC15/ZBTB7B/WNT4/BCL6/KLF10/SEMA4A/SOCS1/DOCK10/PGLYRP2/ZFPM1/TNFRSF18/PIK3R1/ANXA2/ZFP36L2/GAB2/EGR1/RELB/INHA/RORC/FSTL3/FAM20C/CCR7/ZFP36L1/ZMIZ1/EFNA4/RRAS/CEBPB/IL20/MMP9/ITM2A/GNAS/MYH9/MYB/BLNK/TLR2/EPHA2/SOX13/JAG2/BCL11B/CITED2/SBNO2/ESRRA/DOCK2/IFNL1/CT…	94
BP	GO:0007565	female pregnancy	45|2653	170|14725	0.00380864	0.0795723	ENSG00000091831/ENSG00000189143/ENSG00000159167/ENSG00000171223/ENSG00000178726/ENSG00000113494/ENSG00000182195/ENSG00000082175/ENSG00000005884/ENSG00000170345/ENSG00000113739/ENSG00000131759/ENSG00000115457/ENSG00000162552/ENSG00000010704/ENSG00000186350/ENSG00000007866/ENSG00000115461/ENSG00000169083/ENSG00000213853/ENSG00000117394/ENSG00000165474/ENSG00000183668/ENSG00000142208/ENSG00000100985…	ESR1/CLDN4/STC1/JUNB/THBD/PRLR/LDOC1/PGR/ITGA3/FOS/STC2/RARA/IGFBP2/WNT4/HFE/RXRA/TEAD3/IGFBP5/AR/EMP2/SLC2A1/GJB2/PSG9/AKT1/MMP9/VDR/GNAS/ADRA2B/TGFB3/VMP1/COMT/HSD11B2/CITED2/AMBP/NR2F2/FOSL1/SLC38A1/CST3/LIF/ADRA2C/ARHGDIB/COL16A1/ADIPOR2/DDR1/CTSB	45
BP	GO:0060711	labyrinthine layer development	16|2653	45|14725	0.00385724	0.0802511	ENSG00000166145/ENSG00000149418/ENSG00000188064/ENSG00000167642/ENSG00000184557/ENSG00000171223/ENSG00000101144/ENSG00000083307/ENSG00000185650/ENSG00000142208/ENSG00000125850/ENSG00000136720/ENSG00000161714/ENSG00000114315/ENSG00000177885/ENSG00000163251	SPINT1/ST14/WNT7B/SPINT2/SOCS3/JUNB/BMP7/GRHL2/ZFP36L1/AKT1/OVOL2/HS6ST1/PLCD3/HES1/GRB2/FZD5	16
BP	GO:0051893	regulation of focal adhesion assembly	17|2653	49|14725	0.00393804	0.0802511	ENSG00000137801/ENSG00000189058/ENSG00000141376/ENSG00000173156/ENSG00000248905/ENSG00000124145/ENSG00000099250/ENSG00000162552/ENSG00000090020/ENSG00000115109/ENSG00000158856/ENSG00000149177/ENSG00000166949/ENSG00000076826/ENSG00000112715/ENSG00000197747/ENSG00000084636	THBS1/APOD/BCAS3/RHOD/FMN1/SDC4/NRP1/WNT4/SLC9A1/EPB41L5/DMTN/PTPRJ/SMAD3/CAMSAP3/VEGFA/S100A10/COL16A1	17
BP	GO:0090109	regulation of cell-substrate junction assembly	17|2653	49|14725	0.00393804	0.0802511	ENSG00000137801/ENSG00000189058/ENSG00000141376/ENSG00000173156/ENSG00000248905/ENSG00000124145/ENSG00000099250/ENSG00000162552/ENSG00000090020/ENSG00000115109/ENSG00000158856/ENSG00000149177/ENSG00000166949/ENSG00000076826/ENSG00000112715/ENSG00000197747/ENSG00000084636	THBS1/APOD/BCAS3/RHOD/FMN1/SDC4/NRP1/WNT4/SLC9A1/EPB41L5/DMTN/PTPRJ/SMAD3/CAMSAP3/VEGFA/S100A10/COL16A1	17
BP	GO:0007596	blood coagulation	72|2653	297|14725	0.00394901	0.0802511	ENSG00000137801/ENSG00000159176/ENSG00000107485/ENSG00000100311/ENSG00000111679/ENSG00000164690/ENSG00000278828/ENSG00000178726/ENSG00000168542/ENSG00000163220/ENSG00000010278/ENSG00000106211/ENSG00000054179/ENSG00000183044/ENSG00000078401/ENSG00000156049/ENSG00000273983/ENSG00000101608/ENSG00000171903/ENSG00000187848/ENSG00000198517/ENSG00000179588/ENSG00000145675/ENSG00000107099/ENSG00000182718…	THBS1/CSRP1/GATA3/PDGFB/PTPN6/SHH/HIST1H3H/THBD/COL3A1/S100A9/CD9/HSPB1/ENTPD2/ABAT/EDN1/GNA14/HIST1H3G/MYL12A/CYP4F11/P2RX2/MAFK/ZFPM1/PIK3R1/DOCK8/ANXA2/PRKAR1B/PDGFA/TFPI/CAV1/ITPR3/PRKCD/DMTN/AKT1/FLNA/RHOB/IRF2/HIST1H3B/GNAS/MYH9/WAS/HIST2H3D/ADRA2B/VAV2/F7/H3F3B/SERPINA5/MAFF/HIST1H3A/P2RX4/ITPK1/PRKCH/ACTB/RAD51C/EHD1/IRF1/ITPR1/F12/SERPING1/TRPC6/HIST1H3E/ADRA2C/ARRB1/VWF/DOCK6/MICAL1/VAV…	72
BP	GO:0048009	insulin-like growth factor receptor signaling pathway	12|2653	30|14725	0.00395513	0.0802511	ENSG00000062038/ENSG00000146674/ENSG00000141753/ENSG00000169047/ENSG00000115457/ENSG00000115461/ENSG00000145675/ENSG00000169083/ENSG00000164976/ENSG00000142208/ENSG00000140443/ENSG00000167779	CDH3/IGFBP3/IGFBP4/IRS1/IGFBP2/IGFBP5/PIK3R1/AR/MYORG/AKT1/IGF1R/IGFBP6	12
BP	GO:0060603	mammary gland duct morphogenesis	12|2653	30|14725	0.00395513	0.0802511	ENSG00000091831/ENSG00000082175/ENSG00000162552/ENSG00000169083/ENSG00000244405/ENSG00000109321/ENSG00000111424/ENSG00000120149/ENSG00000142627/ENSG00000162337/ENSG00000117139/ENSG00000204580	ESR1/PGR/WNT4/AR/ETV5/AREG/VDR/MSX2/EPHA2/LRP5/KDM5B/DDR1	12
BP	GO:0009306	protein secretion	100|2653	433|14725	0.00396666	0.0802511	ENSG00000107485/ENSG00000128564/ENSG00000163083/ENSG00000119714/ENSG00000115267/ENSG00000073350/ENSG00000205542/ENSG00000183044/ENSG00000167964/ENSG00000011347/ENSG00000134830/ENSG00000115221/ENSG00000197971/ENSG00000100219/ENSG00000185386/ENSG00000169047/ENSG00000087085/ENSG00000170745/ENSG00000173175/ENSG00000171522/ENSG00000173267/ENSG00000092969/ENSG00000130529/ENSG00000104783/ENSG00000007384…	GATA3/VGF/INHBB/GPR68/IFIH1/LLGL2/TMSB4X/ABAT/RAB26/SYT7/C5AR2/ITGB6/MBP/XBP1/MAPK11/IRS1/ACHE/KCNS3/ADCY5/PTGER4/SNCG/TGFB2/TRPM4/KCNN4/RHBDF1/GPER1/SREBF1/IDH2/VTCN1/CPT1A/RAB37/NOX5/ZC3H12A/ICA1/SLC2A1/BANK1/ITPR3/CCR7/DMTN/FAM3B/PPP3CA/FFAR2/SNX19/RAB15/GNAS/NR1H2/IL17RC/PTPRN2/HCAR2/TGFB3/ABCA1/TRAF3IP2/FN1/TLR2/NOV/HLA-DRB1/STX1A/SLC25A6/SNAP25/ANXA4/PFKL/SCAMP5/MAFA/LRP5/MIDN/AACS/TNFRSF21…	100
BP	GO:0042632	cholesterol homeostasis	18|2653	53|14725	0.00396917	0.0802511	ENSG00000160179/ENSG00000100219/ENSG00000204740/ENSG00000187134/ENSG00000107331/ENSG00000144063/ENSG00000105974/ENSG00000167780/ENSG00000007944/ENSG00000130164/ENSG00000131408/ENSG00000116833/ENSG00000165029/ENSG00000162337/ENSG00000204624/ENSG00000110047/ENSG00000149357/ENSG00000073060	ABCG1/XBP1/MALRD1/AKR1C1/ABCA2/MALL/CAV1/SOAT2/MYLIP/LDLR/NR1H2/NR5A2/ABCA1/LRP5/DISP3/EHD1/LAMTOR1/SCARB1	18
BP	GO:0055092	sterol homeostasis	18|2653	53|14725	0.00396917	0.0802511	ENSG00000160179/ENSG00000100219/ENSG00000204740/ENSG00000187134/ENSG00000107331/ENSG00000144063/ENSG00000105974/ENSG00000167780/ENSG00000007944/ENSG00000130164/ENSG00000131408/ENSG00000116833/ENSG00000165029/ENSG00000162337/ENSG00000204624/ENSG00000110047/ENSG00000149357/ENSG00000073060	ABCG1/XBP1/MALRD1/AKR1C1/ABCA2/MALL/CAV1/SOAT2/MYLIP/LDLR/NR1H2/NR5A2/ABCA1/LRP5/DISP3/EHD1/LAMTOR1/SCARB1	18
BP	GO:0042303	molting cycle	29|2653	99|14725	0.00400337	0.0803666	ENSG00000107984/ENSG00000062038/ENSG00000164690/ENSG00000103089/ENSG00000092969/ENSG00000170523/ENSG00000073282/ENSG00000115461/ENSG00000128422/ENSG00000130702/ENSG00000104881/ENSG00000197461/ENSG00000123364/ENSG00000198758/ENSG00000120149/ENSG00000087460/ENSG00000186832/ENSG00000167968/ENSG00000102871/ENSG00000137497/ENSG00000075275/ENSG00000148400/ENSG00000109101/ENSG00000160588/ENSG00000197535…	DKK1/CDH3/SHH/FA2H/TGFB2/KRT83/TP63/IGFBP5/KRT17/LAMA5/PPP1R13L/PDGFA/HOXC13/EPS8L3/MSX2/GNAS/KRT16/DNASE1L2/TRADD/NUMA1/CELSR1/NOTCH1/FOXN1/MPZL3/MYO5A/INHBA/TMEM79/SNAI1/TRPV3	29
BP	GO:0042633	hair cycle	29|2653	99|14725	0.00400337	0.0803666	ENSG00000107984/ENSG00000062038/ENSG00000164690/ENSG00000103089/ENSG00000092969/ENSG00000170523/ENSG00000073282/ENSG00000115461/ENSG00000128422/ENSG00000130702/ENSG00000104881/ENSG00000197461/ENSG00000123364/ENSG00000198758/ENSG00000120149/ENSG00000087460/ENSG00000186832/ENSG00000167968/ENSG00000102871/ENSG00000137497/ENSG00000075275/ENSG00000148400/ENSG00000109101/ENSG00000160588/ENSG00000197535…	DKK1/CDH3/SHH/FA2H/TGFB2/KRT83/TP63/IGFBP5/KRT17/LAMA5/PPP1R13L/PDGFA/HOXC13/EPS8L3/MSX2/GNAS/KRT16/DNASE1L2/TRADD/NUMA1/CELSR1/NOTCH1/FOXN1/MPZL3/MYO5A/INHBA/TMEM79/SNAI1/TRPV3	29
BP	GO:0007599	hemostasis	73|2653	302|14725	0.00402173	0.0804488	ENSG00000137801/ENSG00000159176/ENSG00000107485/ENSG00000100311/ENSG00000111679/ENSG00000164690/ENSG00000278828/ENSG00000178726/ENSG00000168542/ENSG00000163220/ENSG00000010278/ENSG00000106211/ENSG00000054179/ENSG00000183044/ENSG00000078401/ENSG00000156049/ENSG00000273983/ENSG00000101608/ENSG00000171903/ENSG00000161642/ENSG00000187848/ENSG00000198517/ENSG00000179588/ENSG00000145675/ENSG00000107099…	THBS1/CSRP1/GATA3/PDGFB/PTPN6/SHH/HIST1H3H/THBD/COL3A1/S100A9/CD9/HSPB1/ENTPD2/ABAT/EDN1/GNA14/HIST1H3G/MYL12A/CYP4F11/ZNF385A/P2RX2/MAFK/ZFPM1/PIK3R1/DOCK8/ANXA2/PRKAR1B/PDGFA/TFPI/CAV1/ITPR3/PRKCD/DMTN/AKT1/FLNA/RHOB/IRF2/HIST1H3B/GNAS/MYH9/WAS/HIST2H3D/ADRA2B/VAV2/F7/H3F3B/SERPINA5/MAFF/HIST1H3A/P2RX4/ITPK1/PRKCH/ACTB/RAD51C/EHD1/IRF1/ITPR1/F12/SERPING1/TRPC6/HIST1H3E/ADRA2C/ARRB1/VWF/DOCK6/MI…	73
BP	GO:1903706	regulation of hemopoiesis	93|2653	399|14725	0.00405715	0.0805987	ENSG00000137801/ENSG00000107485/ENSG00000178467/ENSG00000006747/ENSG00000095261/ENSG00000131981/ENSG00000111679/ENSG00000119714/ENSG00000164690/ENSG00000278828/ENSG00000187608/ENSG00000158406/ENSG00000128016/ENSG00000101096/ENSG00000179388/ENSG00000100219/ENSG00000273983/ENSG00000159216/ENSG00000163636/ENSG00000170345/ENSG00000100906/ENSG00000131759/ENSG00000180694/ENSG00000197046/ENSG00000160685…	THBS1/GATA3/P4HTM/SCIN/PSMD5/LGALS3/PTPN6/GPR68/SHH/HIST1H3H/ISG15/HIST1H4H/ZFP36/NFATC2/EGR3/XBP1/HIST1H3G/RUNX1/PSMD6/FOS/NFKBIA/RARA/TMEM64/SIGLEC15/ZBTB7B/BCL6/KLF10/SOCS1/PGLYRP2/ZFPM1/TNFRSF18/PIK3R1/HIST4H4/RARG/ZFP36L2/PSMB10/INHA/FSTL3/ZFP36L1/ZMIZ1/CEBPB/IL20/PRMT6/HIST1H3B/GNAS/MYB/HIST2H3D/CIB1/JAG1/HIST1H4K/SOX13/LEO1/HIST2H4B/H3F3B/PSME1/HIST1H3A/ESRRA/PSMA7/IFNL1/NOTCH1/CTNNBIP1/IL…	93
BP	GO:0051047	positive regulation of secretion	79|2653	331|14725	0.00406667	0.0805987	ENSG00000107485/ENSG00000137501/ENSG00000092929/ENSG00000163083/ENSG00000006747/ENSG00000118640/ENSG00000119714/ENSG00000115267/ENSG00000107562/ENSG00000163220/ENSG00000175591/ENSG00000183044/ENSG00000011347/ENSG00000197971/ENSG00000078401/ENSG00000100219/ENSG00000185386/ENSG00000041353/ENSG00000087085/ENSG00000270885/ENSG00000145103/ENSG00000124145/ENSG00000101188/ENSG00000171522/ENSG00000196557…	GATA3/SYTL2/UNC13D/INHBB/SCIN/VAMP8/GPR68/IFIH1/CXCL12/S100A9/P2RY2/ABAT/SYT7/MBP/EDN1/XBP1/MAPK11/RAB27B/ACHE/RASL10B/ILDR1/SDC4/NTSR1/PTGER4/CACNA1H/TGFB2/TRPM4/SDC1/KCNN4/SYT10/PLA2R1/CYBA/GPER1/HFE/ZP3/SOX11/VTCN1/GAB2/S100A8/INHA/RAB3D/FFAR2/ITGAM/CACNA1I/KISS1/TFR2/RAB15/NR1H2/IL17RC/MYB/HCAR2/TGFB3/TLR2/HLA-DRB1/STX1A/SMPD3/SCAMP5/AACS/P2RX4/STX1B/HK1/RASGRP1/PHPT1/ATP6AP1/TRPV4/GRK2/ARRB1…	79
BP	GO:1903900	regulation of viral life cycle	34|2653	121|14725	0.00407208	0.0805987	ENSG00000184012/ENSG00000142089/ENSG00000100097/ENSG00000187608/ENSG00000157601/ENSG00000111331/ENSG00000166801/ENSG00000135114/ENSG00000130303/ENSG00000178685/ENSG00000148180/ENSG00000163874/ENSG00000089127/ENSG00000132256/ENSG00000172183/ENSG00000130202/ENSG00000185201/ENSG00000169429/ENSG00000130813/ENSG00000121060/ENSG00000116833/ENSG00000185885/ENSG00000124164/ENSG00000171206/ENSG00000070756…	TMPRSS2/IFITM3/LGALS1/ISG15/MX1/OAS3/FAM111A/OASL/BST2/PARP10/GSN/ZC3H12A/OAS1/TRIM5/ISG20/NECTIN2/IFITM2/CXCL8/C19orf66/TRIM25/NR5A2/IFITM1/VAPB/TRIM8/PABPC1/NOTCH1/PC/RSAD2/TARBP2/ADARB1/CAV2/CHMP4C/HS3ST5/P4HB	34
BP	GO:0060669	embryonic placenta morphogenesis	10|2653	23|14725	0.00411345	0.08085	ENSG00000166145/ENSG00000149418/ENSG00000188064/ENSG00000167642/ENSG00000184557/ENSG00000101144/ENSG00000083307/ENSG00000185650/ENSG00000177885/ENSG00000163251	SPINT1/ST14/WNT7B/SPINT2/SOCS3/BMP7/GRHL2/ZFP36L1/GRB2/FZD5	10
BP	GO:1903393	positive regulation of adherens junction organization	10|2653	23|14725	0.00411345	0.08085	ENSG00000248905/ENSG00000124145/ENSG00000099250/ENSG00000162552/ENSG00000115109/ENSG00000149177/ENSG00000166949/ENSG00000112715/ENSG00000197747/ENSG00000084636	FMN1/SDC4/NRP1/WNT4/EPB41L5/PTPRJ/SMAD3/VEGFA/S100A10/COL16A1	10
BP	GO:0046578	regulation of Ras protein signal transduction	52|2653	203|14725	0.00413506	0.0809925	ENSG00000165140/ENSG00000205336/ENSG00000124126/ENSG00000177106/ENSG00000125637/ENSG00000168542/ENSG00000127084/ENSG00000131037/ENSG00000130762/ENSG00000142632/ENSG00000112379/ENSG00000005884/ENSG00000008323/ENSG00000092969/ENSG00000099250/ENSG00000113916/ENSG00000111344/ENSG00000182957/ENSG00000050327/novel.697/ENSG00000074964/ENSG00000183111/ENSG00000185989/ENSG00000165029/novel.699/ENSG0000016…	FBP1/ADGRG1/PREX1/EPS8L2/PSD4/COL3A1/FGD3/EPS8L1/ARHGEF16/ARHGEF19/ARFGEF3/ITGA3/PLEKHG6/TGFB2/NRP1/BCL6/RASAL1/SPATA13/ARHGEF5/-/ARHGEF10L/ARHGEF37/RASA3/ABCA1/-/VAV2/PLEKHG5/ARHGEF28/ARHGEF17/CYTH2/MCF2L/ABR/MADD/ARHGAP35/NOTCH1/-/RASGRP1/-/ARRB1/RTN4R/DAB2IP/SQSTM1/IQSEC2/ARHGDIB/HRAS/FGD4/VAV3/OPHN1/DENND1A/ARHGEF1/ARHGEF38/VAV1	52
BP	GO:0002768	immune response-regulating cell surface receptor signaling pathway	71|2653	293|14725	0.00423212	0.0826069	ENSG00000107485/ENSG00000095261/ENSG00000131981/ENSG00000111679/ENSG00000117983/ENSG00000134830/ENSG00000101096/ENSG00000159216/ENSG00000172551/ENSG00000163636/ENSG00000170345/ENSG00000100906/ENSG00000104783/ENSG00000172243/ENSG00000145675/ENSG00000163874/ENSG00000198502/ENSG00000185499/ENSG00000033327/ENSG00000104856/ENSG00000205220/ENSG00000169894/ENSG00000126353/ENSG00000163932/ENSG00000138814…	GATA3/PSMD5/LGALS3/PTPN6/MUC5B/C5AR2/NFATC2/RUNX1/MUCL1/PSMD6/FOS/NFKBIA/KCNN4/CLEC7A/PIK3R1/ZC3H12A/HLA-DRB5/MUC1/GAB2/RELB/PSMB10/MUC3A/CCR7/PRKCD/PPP3CA/NECTIN2/FFAR2/ARPC1B/PTPRJ/CARD9/WAS/VAV2/PAX5/HCK/RNF31/HLA-DRB1/ARPC4/RFTN1/PSME1/BCAR1/PSMA7/PRKCH/TNFRSF21/MYO1C/ACTB/PSMC5/PHPT1/PLCG1/BRK1/LIME1/UBC/IKBKG/PSME2/LIMK1/GRB2/SPG21/PRKD2/CYFIP1/SHC1/PSMD4/HRAS/VAV3/MAP3K1/MAPK3/RIPK2/EIF2B5…	71
BP	GO:1901615	organic hydroxy compound metabolic process	102|2653	444|14725	0.00430888	0.0838151	ENSG00000107485/ENSG00000062038/ENSG00000132746/ENSG00000081923/ENSG00000088002/ENSG00000170775/ENSG00000161905/ENSG00000160179/ENSG00000138061/ENSG00000116016/ENSG00000109452/ENSG00000183044/ENSG00000168350/ENSG00000160211/ENSG00000006534/ENSG00000196139/ENSG00000184845/ENSG00000103253/ENSG00000101188/ENSG00000196557/ENSG00000092969/ENSG00000149809/ENSG00000204740/ENSG00000125618/ENSG00000099377…	GATA3/CDH3/ALDH3B2/ATP8B1/SULT2B1/GPR37/ALOX15/ABCG1/CYP1B1/EPAS1/INPP4B/ABAT/DEGS2/G6PD/ALDH3B1/AKR1C3/DRD1/HAGHL/NTSR1/CACNA1H/TGFB2/TM7SF2/MALRD1/PAX8/HSD3B7/GPER1/WNT4/SREBF1/DIO2/RXRA/OSBPL7/AKR1C1/CYP1A1/TH/DIO3/ACER2/NR4A2/TPO/ALDH1A3/PDXK/SOAT2/TRERF1/ITGAM/HPN/LSS/VDR/SDR16C5/LDLR/MVD/PNKD/NR5A2/ABCA1/COMT/CYP24A1/APOBR/ITPKC/HAGH/ITPKA/CPQ/SULT1A1/PLCD3/POR/ACAA1/LRP5/DISP3/FASN/ITPK1/P…	102
BP	GO:0030217	T cell differentiation	49|2653	190|14725	0.00457046	0.0885979	ENSG00000107485/ENSG00000124126/ENSG00000069399/ENSG00000164690/ENSG00000124813/ENSG00000156127/ENSG00000106003/ENSG00000101096/ENSG00000179388/ENSG00000100219/ENSG00000159216/ENSG00000171522/ENSG00000131759/ENSG00000160685/ENSG00000162552/ENSG00000113916/ENSG00000196189/ENSG00000185338/ENSG00000179588/ENSG00000186891/ENSG00000152518/ENSG00000120738/ENSG00000104856/ENSG00000143365/ENSG00000126353…	GATA3/PREX1/BCL3/SHH/RUNX2/BATF/LFNG/NFATC2/EGR3/XBP1/RUNX1/PTGER4/RARA/ZBTB7B/WNT4/BCL6/SEMA4A/SOCS1/ZFPM1/TNFRSF18/ZFP36L2/EGR1/RELB/RORC/CCR7/ZFP36L1/ZMIZ1/MYB/SOX13/JAG2/BCL11B/DOCK2/IFNL1/IRF1/RSAD2/RHOH/RASGRP1/FOXN1/ADAM8/DLL4/IL27/PATZ1/CLPTM1/MAFB/SMAD7/RIPK2/FZD5/ERBB2/VAV1	49
BP	GO:0018958	phenol-containing compound metabolic process	26|2653	87|14725	0.00465035	0.0897841	ENSG00000107485/ENSG00000062038/ENSG00000170775/ENSG00000116016/ENSG00000183044/ENSG00000184845/ENSG00000092969/ENSG00000125618/ENSG00000211448/ENSG00000180176/ENSG00000197406/ENSG00000153234/ENSG00000115705/ENSG00000169896/ENSG00000105707/ENSG00000127838/ENSG00000093010/ENSG00000104324/ENSG00000196502/ENSG00000197165/ENSG00000185664/ENSG00000197535/ENSG00000164197/ENSG00000105641/ENSG00000135346…	GATA3/CDH3/GPR37/EPAS1/ABAT/DRD1/TGFB2/PAX8/DIO2/TH/DIO3/NR4A2/TPO/ITGAM/HPN/PNKD/COMT/CPQ/SULT1A1/SULT1A2/PMEL/MYO5A/RNF180/SLC5A5/CGA/GCH1	26
BP	GO:0002253	activation of immune response	104|2653	455|14725	0.00466349	0.0897841	ENSG00000091831/ENSG00000107485/ENSG00000189334/ENSG00000095261/ENSG00000131981/ENSG00000172936/ENSG00000111679/ENSG00000115267/ENSG00000117983/ENSG00000263528/ENSG00000163220/ENSG00000143502/ENSG00000134830/ENSG00000101096/ENSG00000159216/ENSG00000172551/ENSG00000163636/ENSG00000100906/ENSG00000125730/ENSG00000125999/ENSG00000104783/ENSG00000051523/ENSG00000161031/ENSG00000172243/ENSG00000164430…	ESR1/GATA3/S100A14/PSMD5/LGALS3/MYD88/PTPN6/IFIH1/MUC5B/IKBKE/S100A9/SUSD4/C5AR2/NFATC2/RUNX1/MUCL1/PSMD6/NFKBIA/C3/BPIFB1/KCNN4/CYBA/PGLYRP2/CLEC7A/CGAS/PIK3R1/ZC3H12A/TRIL/HLA-DRB5/MUC1/TRIM5/RELB/S100A8/PSMB10/CLU/MUC3A/CAV1/CCR7/PRKCD/NECTIN2/FFAR2/ITGAM/ARPC1B/PTPRJ/MAPKAPK2/CARD9/WAS/TMEM173/TLR2/BIRC3/VAV2/PAX5/HCK/TICAM1/RNF31/HLA-DRB1/ARPC4/RFTN1/CNPY3/UNC93B1/PSME1/BCAR1/PSMA7/PRKCH/TNF…	104
BP	GO:0001738	morphogenesis of a polarized epithelium	36|2653	131|14725	0.00473787	0.090906	ENSG00000107984/ENSG00000095261/ENSG00000158055/ENSG00000181392/ENSG00000109062/ENSG00000142632/ENSG00000102981/ENSG00000163637/ENSG00000163636/ENSG00000143126/ENSG00000073282/ENSG00000196581/ENSG00000130702/ENSG00000186193/ENSG00000205220/ENSG00000071127/ENSG00000148219/ENSG00000008300/ENSG00000092010/ENSG00000101182/ENSG00000075275/ENSG00000076826/ENSG00000087191/ENSG00000161203/ENSG00000042753…	DKK1/PSMD5/GRHL3/SYNE4/SLC9A3R1/ARHGEF19/PARD6A/PRICKLE2/PSMD6/CELSR2/TP63/AJAP1/LAMA5/SAPCD2/PSMB10/WDR1/ASTN2/CELSR3/PSME1/PSMA7/CELSR1/CAMSAP3/PSMC5/AP2M1/AP2S1/UBC/PSME2/PSMD4/DAAM1/VANGL1/OPHN1/CLTC/DVL3/SMURF1/FZD5/PSMB4	36
BP	GO:0043491	protein kinase B signaling	53|2653	209|14725	0.00476163	0.0909519	ENSG00000137801/ENSG00000091831/ENSG00000065361/ENSG00000107485/ENSG00000100311/ENSG00000180543/ENSG00000184731/ENSG00000178568/ENSG00000109062/ENSG00000124762/ENSG00000151632/ENSG00000196139/ENSG00000169047/ENSG00000136826/ENSG00000174307/ENSG00000112902/ENSG00000164850/ENSG00000122679/ENSG00000115461/ENSG00000145675/ENSG00000164976/ENSG00000108443/ENSG00000197461/ENSG00000153064/ENSG00000258839…	THBS1/ESR1/ERBB3/GATA3/PDGFB/TSPYL5/FAM110C/ERBB4/SLC9A3R1/CDKN1A/AKR1C2/AKR1C3/IRS1/KLF4/PHLDA3/SEMA5A/GPER1/RAMP3/IGFBP5/PIK3R1/MYORG/RPS6KB1/PDGFA/BANK1/MC1R/PIK3C2B/CCR7/ZFP36L1/AKT1/TRIB3/RRAS/PTPRJ/CCL2/CIB1/CDKN1B/MST1R/EPHA2/F7/FGF22/DDIT3/PDCD6/KLB/PHLPP2/FGF18/EGF/ADAM8/GRB2/DAG1/MKRN1/NOP53/ERBB2/VAV1/NR4A1	53
BP	GO:0086001	cardiac muscle cell action potential	20|2653	62|14725	0.00482188	0.0909519	ENSG00000173801/ENSG00000162989/ENSG00000055118/ENSG00000129682/ENSG00000130529/ENSG00000099822/ENSG00000105711/ENSG00000143153/ENSG00000105974/ENSG00000080709/ENSG00000196924/ENSG00000057294/ENSG00000198929/ENSG00000171385/ENSG00000183230/ENSG00000096696/ENSG00000157388/ENSG00000049759/ENSG00000114279/ENSG00000138622	JUP/KCNJ3/KCNH2/FGF13/TRPM4/HCN2/SCN1B/ATP1B1/CAV1/KCNN2/FLNA/PKP2/NOS1AP/KCND3/CTNNA3/DSP/CACNA1D/NEDD4L/FGF12/HCN4	20
BP	GO:0098739	import across plasma membrane	20|2653	62|14725	0.00482188	0.0909519	ENSG00000162989/ENSG00000110436/ENSG00000101188/ENSG00000130529/ENSG00000115616/ENSG00000010704/ENSG00000122679/ENSG00000099822/ENSG00000090020/ENSG00000143153/ENSG00000168003/ENSG00000003989/ENSG00000175220/ENSG00000141424/ENSG00000165125/ENSG00000105281/ENSG00000132326/ENSG00000065923/ENSG00000180251/ENSG00000138622	KCNJ3/SLC1A2/NTSR1/TRPM4/SLC9A2/HFE/RAMP3/HCN2/SLC9A1/ATP1B1/SLC3A2/SLC7A2/ARHGAP1/SLC39A6/TRPV6/SLC1A5/PER2/SLC9A7/SLC9A4/HCN4	20
BP	GO:0051051	negative regulation of transport	87|2653	372|14725	0.00483016	0.0909519	ENSG00000137801/ENSG00000065361/ENSG00000155066/ENSG00000163083/ENSG00000131981/ENSG00000118640/ENSG00000185101/ENSG00000189058/ENSG00000164690/ENSG00000159167/ENSG00000124507/ENSG00000090339/ENSG00000176720/ENSG00000205542/ENSG00000183044/ENSG00000109062/ENSG00000050628/ENSG00000134830/ENSG00000055118/ENSG00000078401/ENSG00000169047/ENSG00000130303/ENSG00000101188/ENSG00000171522/ENSG00000067066…	THBS1/ERBB3/PROM2/INHBB/LGALS3/VAMP8/ANO9/APOD/SHH/STC1/PACSIN1/ICAM1/BOK/TMSB4X/ABAT/SLC9A3R1/PTGER3/C5AR2/KCNH2/EDN1/IRS1/BST2/NTSR1/PTGER4/SP100/RHBDF1/PARP10/MZB1/PLA2R1/SREBF1/CNIH2/CORO1A/IDH2/ZC3H12A/BANK1/INHA/GNB5/CAV1/DMTN/TCAF2/AKT1/PPP3CA/MMP9/CBARP/WWP2/NR1H2/PNKD/ADRA2B/FN1/TLR2/COMT/NOV/PID1/ANXA4/ABR/OS9/PFKL/ARHGAP1/LRSAM1/SCAMP5/MIDN/CNN2/HRH3/STX1B/TNFRSF21/NPY5R/NOTCH1/PIM3/CR…	87
BP	GO:0051290	protein heterotetramerization	15|2653	42|14725	0.0048345	0.0909519	ENSG00000176884/ENSG00000278828/ENSG00000158406/ENSG00000273983/ENSG00000197837/ENSG00000182718/ENSG00000274267/ENSG00000273542/ENSG00000270276/ENSG00000275714/ENSG00000274750/ENSG00000197747/ENSG00000276180/ENSG00000270882/ENSG00000197153	GRIN1/HIST1H3H/HIST1H4H/HIST1H3G/HIST4H4/ANXA2/HIST1H3B/HIST1H4K/HIST2H4B/HIST1H3A/HIST1H3E/S100A10/HIST1H4I/HIST2H4A/HIST1H3J	15
BP	GO:0038111	interleukin-7-mediated signaling pathway	11|2653	27|14725	0.00485313	0.0909519	ENSG00000278828/ENSG00000169047/ENSG00000273983/ENSG00000185338/ENSG00000126561/ENSG00000114737/ENSG00000274267/ENSG00000183598/ENSG00000275714/ENSG00000274750/ENSG00000197153	HIST1H3H/IRS1/HIST1H3G/SOCS1/STAT5A/CISH/HIST1H3B/HIST2H3D/HIST1H3A/HIST1H3E/HIST1H3J	11
BP	GO:0042634	regulation of hair cycle	11|2653	27|14725	0.00485313	0.0909519	ENSG00000062038/ENSG00000103089/ENSG00000092969/ENSG00000128422/ENSG00000198758/ENSG00000120149/ENSG00000102871/ENSG00000137497/ENSG00000109101/ENSG00000122641/ENSG00000167723	CDH3/FA2H/TGFB2/KRT17/EPS8L3/MSX2/TRADD/NUMA1/FOXN1/INHBA/TRPV3	11
BP	GO:0042403	thyroid hormone metabolic process	9|2653	20|14725	0.0048796	0.0909694	ENSG00000107485/ENSG00000125618/ENSG00000211448/ENSG00000197406/ENSG00000115705/ENSG00000105707/ENSG00000104324/ENSG00000105641/ENSG00000135346	GATA3/PAX8/DIO2/DIO3/TPO/HPN/CPQ/SLC5A5/CGA	9
BP	GO:0016049	cell growth	100|2653	436|14725	0.0049098	0.0909694	ENSG00000165140/ENSG00000198910/ENSG00000064205/ENSG00000143320/ENSG00000146674/ENSG00000175793/ENSG00000141753/ENSG00000006327/ENSG00000198753/ENSG00000140961/ENSG00000107562/ENSG00000163220/ENSG00000001617/ENSG00000124762/ENSG00000171587/ENSG00000160211/ENSG00000164050/ENSG00000078401/ENSG00000130303/ENSG00000129682/ENSG00000092969/ENSG00000099250/ENSG00000115457/ENSG00000112902/ENSG00000051523…	FBP1/L1CAM/WISP2/CRABP2/IGFBP3/SFN/IGFBP4/TNFRSF12A/PLXNB3/OSGIN1/CXCL12/S100A9/SEMA3F/CDKN1A/DSCAM/G6PD/PLXNB1/EDN1/BST2/FGF13/TGFB2/NRP1/IGFBP2/SEMA5A/CYBA/NRG3/MAG/BCL6/JADE2/ARHGAP4/NRCAM/IGFBP5/RASAL1/FSTL4/AR/KRT17/SLC9A1/RERG/OLFM1/RARG/ULK2/SERTAD3/CXCL16/S100A8/EPB41L5/AKT1/CISH/HPN/SLIT1/COBL/PTPRJ/ADAM15/SERTAD1/HSPG2/TGFB3/FN1/CIB1/CDKN1B/SLC3A2/CDHR2/NOV/PAK4/SMAD3/H3F3B/PLXNA3/LAMB2…	100
BP	GO:0072676	lymphocyte migration	19|2653	58|14725	0.00491261	0.0909694	ENSG00000107485/ENSG00000189058/ENSG00000107562/ENSG00000165731/ENSG00000099377/ENSG00000107099/ENSG00000161921/ENSG00000117115/ENSG00000126353/ENSG00000117407/ENSG00000108691/ENSG00000102962/ENSG00000115009/ENSG00000006606/ENSG00000139626/ENSG00000151651/ENSG00000183018/ENSG00000103490/ENSG00000106299	GATA3/APOD/CXCL12/RET/HSD3B7/DOCK8/CXCL16/PADI2/CCR7/ARTN/CCL2/CCL22/CCL20/CCL26/ITGB7/ADAM8/SPNS2/PYCARD/WASL	19
BP	GO:0045010	actin nucleation	16|2653	46|14725	0.0049424	0.0909694	ENSG00000006747/ENSG00000248905/ENSG00000102879/ENSG00000148180/ENSG00000106526/ENSG00000172725/ENSG00000130429/ENSG00000015285/ENSG00000241553/ENSG00000204991/ENSG00000130787/ENSG00000127831/ENSG00000254999/ENSG00000136950/ENSG00000273749/ENSG00000106299	SCIN/FMN1/CORO1A/GSN/ACTR3C/CORO1B/ARPC1B/WAS/ARPC4/SPIRE2/HIP1R/VIL1/BRK1/ARPC5L/CYFIP1/WASL	16
BP	GO:0086002	cardiac muscle cell action potential involved in contraction	16|2653	46|14725	0.0049424	0.0909694	ENSG00000173801/ENSG00000162989/ENSG00000055118/ENSG00000130529/ENSG00000105711/ENSG00000105974/ENSG00000080709/ENSG00000196924/ENSG00000057294/ENSG00000198929/ENSG00000171385/ENSG00000183230/ENSG00000096696/ENSG00000157388/ENSG00000049759/ENSG00000114279	JUP/KCNJ3/KCNH2/TRPM4/SCN1B/CAV1/KCNN2/FLNA/PKP2/NOS1AP/KCND3/CTNNA3/DSP/CACNA1D/NEDD4L/FGF12	16
BP	GO:0045669	positive regulation of osteoblast differentiation	18|2653	54|14725	0.00496946	0.0909694	ENSG00000188064/ENSG00000124813/ENSG00000168743/ENSG00000101144/ENSG00000162552/ENSG00000176887/ENSG00000073282/ENSG00000130522/ENSG00000177706/ENSG00000172216/ENSG00000120149/ENSG00000087460/ENSG00000185885/ENSG00000101384/ENSG00000178585/ENSG00000071553/ENSG00000174306/ENSG00000196923	WNT7B/RUNX2/NPNT/BMP7/WNT4/SOX11/TP63/JUND/FAM20C/CEBPB/MSX2/GNAS/IFITM1/JAG1/CTNNBIP1/ATP6AP1/ZHX3/PDLIM7	18
BP	GO:0033627	cell adhesion mediated by integrin	17|2653	50|14725	0.00498308	0.0909694	ENSG00000111679/ENSG00000138061/ENSG00000090339/ENSG00000169242/ENSG00000115221/ENSG00000165731/ENSG00000168743/ENSG00000092969/ENSG00000103335/ENSG00000177076/ENSG00000185499/ENSG00000128567/ENSG00000185043/ENSG00000136999/ENSG00000142627/ENSG00000084636/ENSG00000106366	PTPN6/CYP1B1/ICAM1/EFNA1/ITGB6/RET/NPNT/TGFB2/PIEZO1/ACER2/MUC1/PODXL/CIB1/NOV/EPHA2/COL16A1/SERPINE1	17
BP	GO:0070830	bicellular tight junction assembly	17|2653	50|14725	0.00498308	0.0909694	ENSG00000165215/ENSG00000140832/ENSG00000163347/ENSG00000130545/ENSG00000124171/ENSG00000124429/ENSG00000102981/ENSG00000159216/ENSG00000164877/ENSG00000083307/ENSG00000158769/ENSG00000152939/ENSG00000027075/ENSG00000197879/ENSG00000150054/ENSG00000124216/ENSG00000163251	CLDN3/MARVELD3/CLDN1/CRB3/PARD6B/POF1B/PARD6A/RUNX1/MICALL2/GRHL2/F11R/MARVELD2/PRKCH/MYO1C/MPP7/SNAI1/FZD5	17
BP	GO:0052548	regulation of endopeptidase activity	77|2653	324|14725	0.00506213	0.0919287	ENSG00000137801/ENSG00000079257/ENSG00000166145/ENSG00000175793/ENSG00000176884/ENSG00000167642/ENSG00000026508/ENSG00000169242/ENSG00000163220/ENSG00000176720/ENSG00000197971/ENSG00000170430/ENSG00000104689/ENSG00000130303/ENSG00000136826/ENSG00000011201/ENSG00000125730/ENSG00000160111/ENSG00000164850/ENSG00000121552/ENSG00000073282/ENSG00000148180/ENSG00000140939/ENSG00000126709/ENSG00000177076…	THBS1/LXN/SPINT1/SFN/GRIN1/SPINT2/CD44/EFNA1/S100A9/BOK/MBP/MGMT/TNFRSF10A/BST2/KLF4/ANOS1/C3/CPAMD8/GPER1/CSTA/TP63/GSN/NOL3/IFI6/ACER2/EGLN3/S100A8/TFPI/CST6/TNFSF10/BID/AKT1/SIAH2/LAMTOR5/MMP9/SERPINB9/SERPINB8/BBC3/FIS1/A2ML1/BIRC3/SMAD3/TTBK1/AMBP/NGFR/SERPINA5/TRADD/PSME1/POR/RENBP/SERPINB5/WFIKKN1/HIP1R/TBC1D10A/FURIN/PDCD6/WNT9A/CTSH/SERPINA3/EFNA3/SERPING1/VEGFA/VIL1/CST3/SERPINH1/ARRB1/…	77
BP	GO:2001233	regulation of apoptotic signaling pathway	84|2653	358|14725	0.00506822	0.0919287	ENSG00000137801/ENSG00000144476/ENSG00000175793/ENSG00000163083/ENSG00000131981/ENSG00000006327/ENSG00000026508/ENSG00000107562/ENSG00000090339/ENSG00000163220/ENSG00000176720/ENSG00000111321/ENSG00000106211/ENSG00000100290/ENSG00000109062/ENSG00000165731/ENSG00000168398/ENSG00000100219/ENSG00000104689/ENSG00000099250/ENSG00000104081/ENSG00000067066/ENSG00000111907/ENSG00000164850/ENSG00000161642…	THBS1/ACKR3/SFN/INHBB/LGALS3/TNFRSF12A/CD44/CXCL12/ICAM1/S100A9/BOK/LTBR/HSPB1/BIK/SLC9A3R1/RET/BDKRB2/XBP1/TNFRSF10A/NRP1/BMF/SP100/TPD52L1/GPER1/ZNF385A/WNT4/TP63/GSN/LMNA/AR/NOL3/TP53INP1/RPS6KB1/IFI6/MUC1/S100A8/NR4A2/TNFSF10/CLU/IL20RA/CAV1/BID/PRKCD/AKT1/SIAH2/MMP9/PLEKHF1/GRINA/BBC3/NACC2/FIS1/WWOX/ZMYND11/AGAP2/SMAD3/DEPTOR/TRADD/CTTN/DYNLL2/BCL2L1/DDIT3/TRAF7/HIP1R/MADD/PPP1CA/PTTG1IP/WF…	84
BP	GO:0045778	positive regulation of ossification	24|2653	79|14725	0.00509108	0.0920474	ENSG00000188064/ENSG00000187608/ENSG00000124813/ENSG00000168743/ENSG00000092969/ENSG00000101144/ENSG00000162552/ENSG00000176887/ENSG00000073282/ENSG00000164920/ENSG00000130522/ENSG00000177706/ENSG00000172216/ENSG00000120149/ENSG00000087460/ENSG00000119699/ENSG00000137203/ENSG00000185885/ENSG00000101384/ENSG00000166949/ENSG00000178585/ENSG00000071553/ENSG00000174306/ENSG00000196923	WNT7B/ISG15/RUNX2/NPNT/TGFB2/BMP7/WNT4/SOX11/TP63/OSR2/JUND/FAM20C/CEBPB/MSX2/GNAS/TGFB3/TFAP2A/IFITM1/JAG1/SMAD3/CTNNBIP1/ATP6AP1/ZHX3/PDLIM7	24
BP	GO:0050768	negative regulation of neurogenesis	59|2653	238|14725	0.0051459	0.0927412	ENSG00000205336/ENSG00000145632/ENSG00000164690/ENSG00000185924/ENSG00000100097/ENSG00000169242/ENSG00000168542/ENSG00000001617/ENSG00000125968/ENSG00000170075/ENSG00000134595/ENSG00000178568/ENSG00000183734/ENSG00000129682/ENSG00000099250/ENSG00000112902/ENSG00000101144/ENSG00000185737/ENSG00000139352/ENSG00000176887/ENSG00000105695/ENSG00000089820/ENSG00000182054/ENSG00000053108/ENSG00000083290…	ADGRG1/PLK2/SHH/RTN4RL1/LGALS1/EFNA1/COL3A1/SEMA3F/ID1/GPR37L1/SOX3/ERBB4/ASCL2/FGF13/NRP1/SEMA5A/BMP7/NRG3/ASCL1/SOX11/MAG/ARHGAP4/IDH2/FSTL4/ULK2/GPR173/CERS2/RAP1GAP/NOTCH3/PPP3CA/MYLIP/LDLR/KIAA0319/MYCN/C16orf45/CIB1/PMP22/JAG1/VIM/CTDSP1/NGFR/PLXNA3/DISP3/STX1B/NOTCH1/IRX3/RNF6/CTNNA1/ZHX2/HES1/TRPC6/TRPV4/ADCY6/RTN4R/KCTD11/EFNB2/INPP5J/NTRK3/GAK	59
BP	GO:1901532	regulation of hematopoietic progenitor cell differentiation	30|2653	105|14725	0.00516266	0.0927471	ENSG00000107485/ENSG00000095261/ENSG00000278828/ENSG00000158406/ENSG00000273983/ENSG00000159216/ENSG00000163636/ENSG00000197837/ENSG00000205220/ENSG00000274267/ENSG00000118513/ENSG00000183598/ENSG00000273542/ENSG00000270276/ENSG00000132475/ENSG00000092010/ENSG00000275714/ENSG00000101182/ENSG00000148400/ENSG00000087191/ENSG00000114315/ENSG00000274750/ENSG00000150991/ENSG00000100911/ENSG00000276180…	GATA3/PSMD5/HIST1H3H/HIST1H4H/HIST1H3G/RUNX1/PSMD6/HIST4H4/PSMB10/HIST1H3B/MYB/HIST2H3D/HIST1H4K/HIST2H4B/H3F3B/PSME1/HIST1H3A/PSMA7/NOTCH1/PSMC5/HES1/HIST1H3E/UBC/PSME2/HIST1H4I/PSMD4/TCF3/HIST2H4A/PSMB4/HIST1H3J	30
BP	GO:0001763	morphogenesis of a branching structure	47|2653	182|14725	0.00525208	0.0940539	ENSG00000091831/ENSG00000103067/ENSG00000184292/ENSG00000166145/ENSG00000129514/ENSG00000149418/ENSG00000167642/ENSG00000184557/ENSG00000164690/ENSG00000082175/ENSG00000078401/ENSG00000168743/ENSG00000075223/ENSG00000099250/ENSG00000125618/ENSG00000101144/ENSG00000162552/ENSG00000186350/ENSG00000073282/ENSG00000074527/ENSG00000083307/ENSG00000169083/ENSG00000130702/ENSG00000086062/ENSG00000197461…	ESR1/ESRP2/TACSTD2/SPINT1/FOXA1/ST14/SPINT2/SOCS3/SHH/PGR/EDN1/NPNT/SEMA3C/NRP1/PAX8/BMP7/WNT4/RXRA/TP63/NTN4/GRHL2/AR/LAMA5/B4GALT1/PDGFA/PLXND1/ETV5/AREG/VDR/MSX2/MYCN/EPHA2/LRP5/PPP1CA/CELSR1/NOTCH1/CTNNBIP1/CTSH/VEGFA/EGF/DLL4/GRB2/TGM2/DAG1/KDM5B/DDR1/FZD5	47
BP	GO:0008154	actin polymerization or depolymerization	45|2653	173|14725	0.00539609	0.096287	ENSG00000124126/ENSG00000006747/ENSG00000161905/ENSG00000107562/ENSG00000090339/ENSG00000205542/ENSG00000248905/ENSG00000172830/ENSG00000112902/ENSG00000102879/ENSG00000164877/ENSG00000148180/ENSG00000125753/ENSG00000106526/ENSG00000126353/ENSG00000172725/ENSG00000163932/ENSG00000158856/ENSG00000106078/ENSG00000130429/ENSG00000015285/ENSG00000071127/ENSG00000101336/ENSG00000241553/ENSG00000204991…	PREX1/SCIN/ALOX15/CXCL12/ICAM1/TMSB4X/FMN1/SSH3/SEMA5A/CORO1A/MICALL2/GSN/VASP/ACTR3C/CCR7/CORO1B/PRKCD/DMTN/COBL/ARPC1B/WAS/WDR1/HCK/ARPC4/SPIRE2/CTTN/HIP1R/ARHGAP35/CCL26/MYO1C/CFL1/VIL1/MSRB2/BRK1/ARPC5L/TMOD3/GRB2/CYFIP1/MYADM/MICAL1/PYCARD/CAPG/COBLL1/WASL/NPHS1	45
BP	GO:0090313	regulation of protein targeting to membrane	12|2653	31|14725	0.00541092	0.096287	ENSG00000158856/ENSG00000170379/ENSG00000169896/ENSG00000174827/ENSG00000103888/ENSG00000214253/ENSG00000185043/ENSG00000197879/ENSG00000177427/ENSG00000105221/ENSG00000141736/ENSG00000198420	DMTN/TCAF2/ITGAM/PDZK1/CEMIP/FIS1/CIB1/MYO1C/MIEF2/AKT2/ERBB2/TCAF1	12
BP	GO:0007009	plasma membrane organization	22|2653	71|14725	0.00551605	0.0978491	ENSG00000138119/ENSG00000185101/ENSG00000103089/ENSG00000124507/ENSG00000163220/ENSG00000011347/ENSG00000128274/ENSG00000092969/ENSG00000148180/ENSG00000169083/ENSG00000169247/ENSG00000120885/ENSG00000121966/ENSG00000105974/ENSG00000163932/ENSG00000142208/ENSG00000132613/ENSG00000165912/ENSG00000105221/ENSG00000105971/ENSG00000106299/ENSG00000024422	MYOF/ANO9/FA2H/PACSIN1/S100A9/SYT7/A4GALT/TGFB2/GSN/AR/SH3TC2/CLU/CXCR4/CAV1/PRKCD/AKT1/MTSS1L/PACSIN3/AKT2/CAV2/WASL/EHD2	22
BP	GO:0043567	regulation of insulin-like growth factor receptor signaling pathway	8|2653	17|14725	0.00568229	0.100418	ENSG00000062038/ENSG00000146674/ENSG00000141753/ENSG00000115457/ENSG00000115461/ENSG00000169083/ENSG00000164976/ENSG00000167779	CDH3/IGFBP3/IGFBP4/IGFBP2/IGFBP5/AR/MYORG/IGFBP6	8
BP	GO:0032649	regulation of interferon-gamma production	21|2653	67|14725	0.00571283	0.100418	ENSG00000107485/ENSG00000069399/ENSG00000187608/ENSG00000131759/ENSG00000188372/ENSG00000161031/ENSG00000179588/ENSG00000163874/ENSG00000018280/ENSG00000123999/ENSG00000126353/ENSG00000196126/ENSG00000182393/ENSG00000172575/ENSG00000103855/ENSG00000197272/ENSG00000122641/ENSG00000174775/ENSG00000103490/ENSG00000104312/ENSG00000163251	GATA3/BCL3/ISG15/RARA/ZP3/PGLYRP2/ZFPM1/ZC3H12A/SLC11A1/INHA/CCR7/HLA-DRB1/IFNL1/RASGRP1/CD276/IL27/INHBA/HRAS/PYCARD/RIPK2/FZD5	21
BP	GO:0008361	regulation of cell size	39|2653	146|14725	0.00571426	0.100418	ENSG00000198910/ENSG00000143320/ENSG00000006327/ENSG00000107562/ENSG00000001617/ENSG00000109062/ENSG00000171587/ENSG00000165731/ENSG00000078401/ENSG00000129682/ENSG00000099250/ENSG00000112902/ENSG00000104783/ENSG00000105695/ENSG00000089820/ENSG00000091129/ENSG00000053108/ENSG00000130558/ENSG00000172819/ENSG00000083290/ENSG00000142208/ENSG00000134248/ENSG00000115414/ENSG00000160293/ENSG00000155792…	L1CAM/CRABP2/TNFRSF12A/CXCL12/SEMA3F/SLC9A3R1/DSCAM/RET/EDN1/FGF13/NRP1/SEMA5A/KCNN4/MAG/ARHGAP4/NRCAM/FSTL4/OLFM1/RARG/ULK2/AKT1/LAMTOR5/FN1/VAV2/DEPTOR/PLXNA3/CTTN/PLXNA4/RNF6/VEGFA/TRPV4/RTN4R/LIMK1/SLC12A2/CYFIP1/VAV3/CDKL5/VAV1/NTRK3	39
BP	GO:0008630	intrinsic apoptotic signaling pathway in response to DNA damage	28|2653	97|14725	0.00578638	0.100786	ENSG00000144476/ENSG00000175793/ENSG00000076242/ENSG00000176046/ENSG00000069399/ENSG00000026508/ENSG00000107562/ENSG00000263528/ENSG00000176720/ENSG00000124762/ENSG00000174307/ENSG00000161642/ENSG00000073282/ENSG00000145675/ENSG00000163349/ENSG00000185499/ENSG00000120885/ENSG00000015475/ENSG00000067182/ENSG00000213145/ENSG00000148411/ENSG00000168209/ENSG00000142627/ENSG00000171552/ENSG00000164054…	ACKR3/SFN/MLH1/NUPR1/BCL3/CD44/CXCL12/IKBKE/BOK/CDKN1A/PHLDA3/ZNF385A/TP63/PIK3R1/HIPK1/MUC1/CLU/BID/TNFRSF1A/CRIP1/NACC2/DDIT4/EPHA2/BCL2L1/SHISA5/ELL3/SNAI1/PYCARD	28
BP	GO:1902036	regulation of hematopoietic stem cell differentiation	28|2653	97|14725	0.00578638	0.100786	ENSG00000107485/ENSG00000095261/ENSG00000278828/ENSG00000158406/ENSG00000273983/ENSG00000159216/ENSG00000163636/ENSG00000197837/ENSG00000205220/ENSG00000274267/ENSG00000118513/ENSG00000183598/ENSG00000273542/ENSG00000270276/ENSG00000132475/ENSG00000092010/ENSG00000275714/ENSG00000101182/ENSG00000087191/ENSG00000274750/ENSG00000150991/ENSG00000100911/ENSG00000276180/ENSG00000159352/ENSG00000071564…	GATA3/PSMD5/HIST1H3H/HIST1H4H/HIST1H3G/RUNX1/PSMD6/HIST4H4/PSMB10/HIST1H3B/MYB/HIST2H3D/HIST1H4K/HIST2H4B/H3F3B/PSME1/HIST1H3A/PSMA7/PSMC5/HIST1H3E/UBC/PSME2/HIST1H4I/PSMD4/TCF3/HIST2H4A/PSMB4/HIST1H3J	28
BP	GO:0010883	regulation of lipid storage	13|2653	35|14725	0.00580669	0.100786	ENSG00000160179/ENSG00000263528/ENSG00000100906/ENSG00000125730/ENSG00000214456/ENSG00000163874/ENSG00000135245/ENSG00000131408/ENSG00000165029/ENSG00000197296/ENSG00000110047/ENSG00000073060/ENSG00000170419	ABCG1/IKBKE/NFKBIA/C3/PLIN5/ZC3H12A/HILPDA/NR1H2/ABCA1/FITM2/EHD1/SCARB1/VSTM2A	13
BP	GO:0045742	positive regulation of epidermal growth factor receptor signaling pathway	13|2653	35|14725	0.00580669	0.100786	ENSG00000106541/ENSG00000101213/ENSG00000163235/ENSG00000164850/ENSG00000142208/ENSG00000100985/ENSG00000274286/ENSG00000130787/ENSG00000169129/ENSG00000184160/ENSG00000138798/ENSG00000150991/ENSG00000160410	AGR2/PTK6/TGFA/GPER1/AKT1/MMP9/ADRA2B/HIP1R/AFAP1L2/ADRA2C/EGF/UBC/SHKBP1	13
BP	GO:0042036	negative regulation of cytokine biosynthetic process	10|2653	24|14725	0.00592801	0.102576	ENSG00000163083/ENSG00000069399/ENSG00000128016/ENSG00000136826/ENSG00000179588/ENSG00000123999/ENSG00000123609/ENSG00000185187/ENSG00000126456/ENSG00000122641	INHBB/BCL3/ZFP36/KLF4/ZFPM1/INHA/NMI/SIGIRR/IRF3/INHBA	10
BP	GO:0008064	regulation of actin polymerization or depolymerization	40|2653	151|14725	0.00603021	0.103245	ENSG00000124126/ENSG00000006747/ENSG00000161905/ENSG00000107562/ENSG00000090339/ENSG00000205542/ENSG00000248905/ENSG00000172830/ENSG00000112902/ENSG00000102879/ENSG00000148180/ENSG00000125753/ENSG00000106526/ENSG00000126353/ENSG00000172725/ENSG00000163932/ENSG00000158856/ENSG00000130429/ENSG00000015285/ENSG00000071127/ENSG00000101336/ENSG00000241553/ENSG00000204991/ENSG00000085733/ENSG00000130787…	PREX1/SCIN/ALOX15/CXCL12/ICAM1/TMSB4X/FMN1/SSH3/SEMA5A/CORO1A/GSN/VASP/ACTR3C/CCR7/CORO1B/PRKCD/DMTN/ARPC1B/WAS/WDR1/HCK/ARPC4/SPIRE2/CTTN/HIP1R/ARHGAP35/CCL26/MYO1C/CFL1/VIL1/BRK1/ARPC5L/TMOD3/GRB2/CYFIP1/MYADM/PYCARD/CAPG/WASL/NPHS1	40
BP	GO:0046427	positive regulation of JAK-STAT cascade	19|2653	59|14725	0.00604626	0.103245	ENSG00000178078/ENSG00000184557/ENSG00000138061/ENSG00000101213/ENSG00000138496/ENSG00000113494/ENSG00000173193/ENSG00000178568/ENSG00000175505/ENSG00000186891/ENSG00000067182/ENSG00000162891/ENSG00000006016/ENSG00000162892/ENSG00000135439/ENSG00000182393/ENSG00000148400/ENSG00000128342/ENSG00000114315	STAP2/SOCS3/CYP1B1/PTK6/PARP9/PRLR/PARP14/ERBB4/CLCF1/TNFRSF18/TNFRSF1A/IL20/CRLF1/IL24/AGAP2/IFNL1/NOTCH1/LIF/HES1	19
BP	GO:0007589	body fluid secretion	24|2653	80|14725	0.00605657	0.103245	ENSG00000137501/ENSG00000106541/ENSG00000118640/ENSG00000175591/ENSG00000113494/ENSG00000178568/ENSG00000078401/ENSG00000100219/ENSG00000104783/ENSG00000168539/ENSG00000110092/ENSG00000113389/ENSG00000051523/ENSG00000111335/ENSG00000182718/ENSG00000126561/ENSG00000105974/ENSG00000111424/ENSG00000131408/ENSG00000197208/ENSG00000196498/ENSG00000112715/ENSG00000204580/ENSG00000198712	SYTL2/AGR2/VAMP8/P2RY2/PRLR/ERBB4/EDN1/XBP1/KCNN4/CHRM1/CCND1/NPR3/CYBA/OAS2/ANXA2/STAT5A/CAV1/VDR/NR1H2/SLC22A4/NCOR2/VEGFA/DDR1/MT-CO2	24
BP	GO:0034113	heterotypic cell-cell adhesion	14|2653	39|14725	0.006065	0.103245	ENSG00000161905/ENSG00000026508/ENSG00000197971/ENSG00000173801/ENSG00000136826/ENSG00000101144/ENSG00000091129/ENSG00000057294/ENSG00000183230/ENSG00000096696/ENSG00000197702/ENSG00000139626/ENSG00000179820/ENSG00000136689	ALOX15/CD44/MBP/JUP/KLF4/BMP7/NRCAM/PKP2/CTNNA3/DSP/PARVA/ITGB7/MYADM/IL1RN	14
BP	GO:0002758	innate immune response-activating signal transduction	58|2653	235|14725	0.00607124	0.103245	ENSG00000091831/ENSG00000189334/ENSG00000095261/ENSG00000172936/ENSG00000115267/ENSG00000117983/ENSG00000263528/ENSG00000163220/ENSG00000172551/ENSG00000163636/ENSG00000100906/ENSG00000125999/ENSG00000051523/ENSG00000161031/ENSG00000172243/ENSG00000255690/ENSG00000185499/ENSG00000132256/ENSG00000104856/ENSG00000143546/ENSG00000205220/ENSG00000169894/ENSG00000105974/ENSG00000163932/ENSG00000126262…	ESR1/S100A14/PSMD5/MYD88/IFIH1/MUC5B/IKBKE/S100A9/MUCL1/PSMD6/NFKBIA/BPIFB1/CYBA/PGLYRP2/CLEC7A/TRIL/MUC1/TRIM5/RELB/S100A8/PSMB10/MUC3A/CAV1/PRKCD/FFAR2/ITGAM/MAPKAPK2/CARD9/TLR2/BIRC3/HCK/TICAM1/RFTN1/CNPY3/UNC93B1/PSME1/PSMA7/TNIP2/IRF1/RSAD2/PSMC5/NR1D1/UBC/IKBKG/PSME2/IRF3/DAB2IP/INAVA/PSMD4/HRAS/PGLYRP4/NOP53/DHX58/MAP3K1/RIPK2/UBE2V1/CTSB/PSMB4	58
BP	GO:0019216	regulation of lipid metabolic process	79|2653	336|14725	0.00608133	0.103245	ENSG00000100311/ENSG00000189058/ENSG00000101210/ENSG00000160179/ENSG00000167772/ENSG00000196139/ENSG00000169047/ENSG00000136826/ENSG00000149809/ENSG00000125730/ENSG00000204740/ENSG00000214456/ENSG00000164850/ENSG00000162552/ENSG00000072310/ENSG00000186350/ENSG00000188372/ENSG00000134317/ENSG00000110090/ENSG00000145675/ENSG00000140465/ENSG00000197461/ENSG00000130173/ENSG00000120738/ENSG00000103642…	PDGFB/APOD/EEF1A2/ABCG1/ANGPTL4/AKR1C3/IRS1/KLF4/TM7SF2/C3/MALRD1/PLIN5/GPER1/WNT4/SREBF1/RXRA/ZP3/GRHL1/CPT1A/PIK3R1/CYP1A1/PDGFA/ANGPTL8/EGR1/LACTB/UGT1A1/RORC/CAV1/CCR7/PRKCD/TNFRSF1A/AKT1/TRIB3/MLYCD/LSS/VDR/LDLR/NR1H2/MVD/HCAR2/ABCA1/VAV2/LSR/HELZ2/BCL11B/SIK1/RARRES2/POR/PEX11A/SMPD3/DISP3/FITM2/FASN/TNFRSF21/PIK3IP1/LAMTOR1/NCOR2/SERPINA3/NR1D1/PLIN2/EIF6/ORMDL2/DAB2IP/DHCR7/VAV3/AKT2/EDF1…	79
BP	GO:0043534	blood vessel endothelial cell migration	32|2653	115|14725	0.00610691	0.103245	ENSG00000137801/ENSG00000100311/ENSG00000145632/ENSG00000169242/ENSG00000106211/ENSG00000125968/ENSG00000205542/ENSG00000173801/ENSG00000179388/ENSG00000136826/ENSG00000099250/ENSG00000213853/ENSG00000126561/ENSG00000142208/ENSG00000100345/ENSG00000185043/ENSG00000142627/ENSG00000196411/ENSG00000135124/ENSG00000148400/ENSG00000112715/ENSG00000124181/ENSG00000156427/ENSG00000207607/ENSG00000128917…	THBS1/PDGFB/PLK2/EFNA1/HSPB1/ID1/TMSB4X/JUP/EGR3/KLF4/NRP1/EMP2/STAT5A/AKT1/MYH9/CIB1/EPHA2/EPHB4/P2RX4/NOTCH1/VEGFA/PLCG1/FGF18/MIR200A/DLL4/PRKD2/SCARB1/EFNB2/STARD13/HDAC7/NR4A1/VEGFC	32
BP	GO:0031497	chromatin assembly	38|2653	142|14725	0.00611308	0.103245	ENSG00000180543/ENSG00000184678/ENSG00000273802/ENSG00000158373/ENSG00000278828/ENSG00000158406/ENSG00000180596/ENSG00000273983/ENSG00000124635/ENSG00000178685/ENSG00000275713/ENSG00000197903/ENSG00000203814/ENSG00000197837/ENSG00000277224/ENSG00000274267/ENSG00000187837/ENSG00000183598/ENSG00000273542/ENSG00000122390/ENSG00000270276/ENSG00000132475/ENSG00000188375/ENSG00000275714/ENSG00000124575…	TSPYL5/HIST2H2BE/HIST1H2BG/HIST1H2BD/HIST1H3H/HIST1H4H/HIST1H2BC/HIST1H3G/HIST1H2BJ/PARP10/HIST1H2BH/HIST1H2BK/HIST2H2BF/HIST4H4/HIST1H2BF/HIST1H3B/HIST1H1C/HIST2H3D/HIST1H4K/NAA60/HIST2H4B/H3F3B/H3F3C/HIST1H3A/HIST1H1D/HIST1H2BN/HIST1H2BL/HIST1H2BE/HIST1H3E/HIST1H2BI/TNRC18/H2AFX/TSPYL4/HIST1H4I/CENPX/HIST1H2BO/HIST2H4A/HIST1H3J	38
BP	GO:0051898	negative regulation of protein kinase B signaling	15|2653	43|14725	0.00620999	0.104258	ENSG00000109062/ENSG00000136826/ENSG00000174307/ENSG00000164850/ENSG00000153064/ENSG00000142208/ENSG00000101255/ENSG00000149177/ENSG00000185043/ENSG00000142627/ENSG00000175197/ENSG00000249915/ENSG00000040199/ENSG00000173402/ENSG00000105373	SLC9A3R1/KLF4/PHLDA3/GPER1/BANK1/AKT1/TRIB3/PTPRJ/CIB1/EPHA2/DDIT3/PDCD6/PHLPP2/DAG1/NOP53	15
BP	GO:0098900	regulation of action potential	15|2653	43|14725	0.00620999	0.104258	ENSG00000173801/ENSG00000101188/ENSG00000129682/ENSG00000130529/ENSG00000167535/ENSG00000090020/ENSG00000105974/ENSG00000196924/ENSG00000057294/ENSG00000198929/ENSG00000183230/ENSG00000096696/ENSG00000114279/ENSG00000138622/ENSG00000070159	JUP/NTSR1/FGF13/TRPM4/CACNB3/SLC9A1/CAV1/FLNA/PKP2/NOS1AP/CTNNA3/DSP/FGF12/HCN4/PTPN3	15
BP	GO:0001541	ovarian follicle development	17|2653	51|14725	0.00624384	0.104515	ENSG00000091831/ENSG00000128564/ENSG00000163083/ENSG00000090339/ENSG00000106003/ENSG00000176399/ENSG00000188372/ENSG00000123999/ENSG00000172216/ENSG00000123342/ENSG00000171552/ENSG00000177398/ENSG00000044115/ENSG00000112715/ENSG00000137486/ENSG00000122641/ENSG00000145191	ESR1/VGF/INHBB/ICAM1/LFNG/DMRTA1/ZP3/INHA/CEBPB/MMP19/BCL2L1/UMODL1/CTNNA1/VEGFA/ARRB1/INHBA/EIF2B5	17
BP	GO:0008406	gonad development	49|2653	193|14725	0.00630356	0.105202	ENSG00000091831/ENSG00000107485/ENSG00000205336/ENSG00000128564/ENSG00000163083/ENSG00000176046/ENSG00000176788/ENSG00000143552/ENSG00000090339/ENSG00000087510/ENSG00000176720/ENSG00000100290/ENSG00000106003/ENSG00000082175/ENSG00000196139/ENSG00000176399/ENSG00000092969/ENSG00000115884/ENSG00000260428/ENSG00000131759/ENSG00000110092/ENSG00000162552/ENSG00000188372/ENSG00000169083/ENSG00000121858…	ESR1/GATA3/ADGRG1/VGF/INHBB/NUPR1/BASP1/NUP210L/ICAM1/TFAP2C/BOK/BIK/LFNG/PGR/AKR1C3/DMRTA1/TGFB2/SDC1/SCX/RARA/CCND1/WNT4/ZP3/AR/TNFSF10/INHA/FSTL3/CEBPB/MMP19/ADAM15/IRX5/CITED2/ARID5B/BCL2L1/CSDE1/UMODL1/CTNNA1/VEGFA/CST3/NRIP1/RHOBTB3/ARRB1/COL9A3/INHBA/PATZ1/BRIP1/EIF2B5/CGA/REN	49
BP	GO:0046883	regulation of hormone secretion	56|2653	226|14725	0.00635232	0.105419	ENSG00000163083/ENSG00000118640/ENSG00000119714/ENSG00000183044/ENSG00000011347/ENSG00000078401/ENSG00000169047/ENSG00000270885/ENSG00000170745/ENSG00000145103/ENSG00000173175/ENSG00000130529/ENSG00000125618/ENSG00000164850/ENSG00000072310/ENSG00000010704/ENSG00000176887/ENSG00000110090/ENSG00000003147/ENSG00000117394/ENSG00000123999/ENSG00000096433/ENSG00000138814/ENSG00000126262/ENSG00000170498…	INHBB/VAMP8/GPR68/ABAT/SYT7/EDN1/IRS1/RASL10B/KCNS3/ILDR1/ADCY5/TRPM4/PAX8/GPER1/SREBF1/HFE/SOX11/CPT1A/ICA1/SLC2A1/INHA/ITPR3/PPP3CA/FFAR2/KISS1/TFR2/GNAS/MYB/HCAR2/ADRA2B/NOV/HLA-DRB1/STX1A/SLC25A6/SNAP25/PFKL/LRP5/MIDN/AACS/PIM3/CRY2/ITPR1/PHPT1/LIF/NR1D1/ADRA2C/ARRB1/SSTR5/KCNJ11/INHBA/MYRIP/CACNA1D/IL11/KDM5B/PER2/REN	56
BP	GO:0048675	axon extension	29|2653	102|14725	0.00635394	0.105419	ENSG00000198910/ENSG00000006327/ENSG00000198753/ENSG00000107562/ENSG00000001617/ENSG00000171587/ENSG00000164050/ENSG00000099250/ENSG00000112902/ENSG00000105695/ENSG00000089820/ENSG00000091129/ENSG00000130558/ENSG00000083290/ENSG00000187122/ENSG00000115414/ENSG00000130827/ENSG00000172037/ENSG00000085733/ENSG00000177169/ENSG00000082684/ENSG00000221866/ENSG00000127870/ENSG00000112715/ENSG00000040608…	L1CAM/TNFRSF12A/PLXNB3/CXCL12/SEMA3F/DSCAM/PLXNB1/NRP1/SEMA5A/MAG/ARHGAP4/NRCAM/OLFM1/ULK2/SLIT1/FN1/PLXNA3/LAMB2/CTTN/ULK1/SEMA5B/PLXNA4/RNF6/VEGFA/RTN4R/LIMK1/CYFIP1/CDKL5/NTRK3	29
BP	GO:0021783	preganglionic parasympathetic fiber development	7|2653	14|14725	0.0064179	0.106168	ENSG00000001617/ENSG00000099250/ENSG00000137203/ENSG00000130827/ENSG00000221866/ENSG00000114315/ENSG00000197381	SEMA3F/NRP1/TFAP2A/PLXNA3/PLXNA4/HES1/ADARB1	7
BP	GO:0061387	regulation of extent of cell growth	26|2653	89|14725	0.00645817	0.106522	ENSG00000198910/ENSG00000143320/ENSG00000006327/ENSG00000107562/ENSG00000001617/ENSG00000171587/ENSG00000129682/ENSG00000099250/ENSG00000112902/ENSG00000105695/ENSG00000089820/ENSG00000091129/ENSG00000053108/ENSG00000130558/ENSG00000083290/ENSG00000115414/ENSG00000130827/ENSG00000085733/ENSG00000221866/ENSG00000127870/ENSG00000112715/ENSG00000040608/ENSG00000106683/ENSG00000273749/ENSG00000008086…	L1CAM/CRABP2/TNFRSF12A/CXCL12/SEMA3F/DSCAM/FGF13/NRP1/SEMA5A/MAG/ARHGAP4/NRCAM/FSTL4/OLFM1/ULK2/FN1/PLXNA3/CTTN/PLXNA4/RNF6/VEGFA/RTN4R/LIMK1/CYFIP1/CDKL5/NTRK3	26
BP	GO:0060048	cardiac muscle contraction	31|2653	111|14725	0.00650087	0.106799	ENSG00000159167/ENSG00000173801/ENSG00000162989/ENSG00000055118/ENSG00000130529/ENSG00000163874/ENSG00000090020/ENSG00000104881/ENSG00000183963/ENSG00000105711/ENSG00000159173/ENSG00000143153/ENSG00000105974/ENSG00000080709/ENSG00000140416/ENSG00000196924/ENSG00000057294/ENSG00000198929/ENSG00000130598/ENSG00000171385/ENSG00000183230/ENSG00000135124/ENSG00000096696/ENSG00000173020/ENSG00000171298…	STC1/JUP/KCNJ3/KCNH2/TRPM4/ZC3H12A/SLC9A1/PPP1R13L/SMTN/SCN1B/TNNI1/ATP1B1/CAV1/KCNN2/TPM1/FLNA/PKP2/NOS1AP/TNNI2/KCND3/CTNNA3/P2RX4/DSP/GRK2/GAA/CACNA1D/NEDD4L/FGF12/SMAD7/HCN4/CALM1	31
BP	GO:0023061	signal release	87|2653	376|14725	0.00651281	0.106799	ENSG00000107485/ENSG00000128564/ENSG00000173227/ENSG00000163083/ENSG00000118640/ENSG00000119714/ENSG00000124493/ENSG00000142765/ENSG00000138744/ENSG00000183044/ENSG00000011347/ENSG00000078401/ENSG00000169047/ENSG00000270885/ENSG00000170745/ENSG00000145103/ENSG00000173175/ENSG00000173267/ENSG00000130529/ENSG00000125618/ENSG00000110975/ENSG00000164850/ENSG00000072310/ENSG00000010704/ENSG00000176887…	GATA3/VGF/SYT12/INHBB/VAMP8/GPR68/GRM4/SYTL1/NAAA/ABAT/SYT7/EDN1/IRS1/RASL10B/KCNS3/ILDR1/ADCY5/SNCG/TRPM4/PAX8/SYT10/GPER1/SREBF1/HFE/SOX11/BAIAP3/CPT1A/SYT8/SLC6A9/ICA1/FAM129B/SLC2A1/INHA/ITPR3/FAM3B/PPP3CA/FFAR2/KISS1/SNX19/TFR2/GNAS/PTPRN2/MYB/HCAR2/PNKD/ADRA2B/NOV/HLA-DRB1/STX1A/SLC25A6/SNAP25/PPFIA3/PFKL/SMPD3/MAFA/LRP5/MIDN/AACS/LIN7B/HRH3/STX1B/PIM3/CRY2/ITPR1/PHPT1/LIF/NR1D1/TRPV4/CPLX1…	87
BP	GO:0052547	regulation of peptidase activity	81|2653	347|14725	0.00669703	0.108381	ENSG00000137801/ENSG00000079257/ENSG00000166145/ENSG00000175793/ENSG00000176884/ENSG00000167642/ENSG00000026508/ENSG00000169242/ENSG00000163220/ENSG00000176720/ENSG00000197971/ENSG00000170430/ENSG00000104689/ENSG00000130303/ENSG00000136826/ENSG00000011201/ENSG00000125730/ENSG00000160111/ENSG00000164850/ENSG00000121552/ENSG00000073282/ENSG00000148180/ENSG00000140939/ENSG00000126709/ENSG00000177076…	THBS1/LXN/SPINT1/SFN/GRIN1/SPINT2/CD44/EFNA1/S100A9/BOK/MBP/MGMT/TNFRSF10A/BST2/KLF4/ANOS1/C3/CPAMD8/GPER1/CSTA/TP63/GSN/NOL3/IFI6/ACER2/EGLN3/S100A8/TFPI/CST6/TNFSF10/CAV1/BID/AKT1/SIAH2/LAMTOR5/MMP9/SERPINB9/SERPINB8/BBC3/FIS1/FN1/A2ML1/BIRC3/SMAD3/TTBK1/AMBP/NGFR/SERPINA5/TRADD/PSME1/POR/RENBP/SERPINB5/WFIKKN1/HIP1R/TBC1D10A/FURIN/PDCD6/UMODL1/WNT9A/CTSH/SERPINA3/EFNA3/SERPING1/VEGFA/VIL1/CST3…	81
BP	GO:0050922	negative regulation of chemotaxis	11|2653	28|14725	0.00671181	0.108381	ENSG00000137801/ENSG00000001617/ENSG00000134830/ENSG00000099250/ENSG00000112902/ENSG00000117115/ENSG00000172725/ENSG00000108691/ENSG00000136999/ENSG00000130827/ENSG00000148400	THBS1/SEMA3F/C5AR2/NRP1/SEMA5A/PADI2/CORO1B/CCL2/NOV/PLXNA3/NOTCH1	11
BP	GO:0098760	response to interleukin-7	11|2653	28|14725	0.00671181	0.108381	ENSG00000278828/ENSG00000169047/ENSG00000273983/ENSG00000185338/ENSG00000126561/ENSG00000114737/ENSG00000274267/ENSG00000183598/ENSG00000275714/ENSG00000274750/ENSG00000197153	HIST1H3H/IRS1/HIST1H3G/SOCS1/STAT5A/CISH/HIST1H3B/HIST2H3D/HIST1H3A/HIST1H3E/HIST1H3J	11
BP	GO:0098761	cellular response to interleukin-7	11|2653	28|14725	0.00671181	0.108381	ENSG00000278828/ENSG00000169047/ENSG00000273983/ENSG00000185338/ENSG00000126561/ENSG00000114737/ENSG00000274267/ENSG00000183598/ENSG00000275714/ENSG00000274750/ENSG00000197153	HIST1H3H/IRS1/HIST1H3G/SOCS1/STAT5A/CISH/HIST1H3B/HIST2H3D/HIST1H3A/HIST1H3E/HIST1H3J	11
BP	GO:1900101	regulation of endoplasmic reticulum unfolded protein response	11|2653	28|14725	0.00671181	0.108381	ENSG00000106541/ENSG00000176720/ENSG00000100219/ENSG00000145675/ENSG00000198855/ENSG00000105327/ENSG00000109501/ENSG00000139644/ENSG00000136848/ENSG00000178607/ENSG00000196396	AGR2/BOK/XBP1/PIK3R1/FICD/BBC3/WFS1/TMBIM6/DAB2IP/ERN1/PTPN1	11
BP	GO:0001558	regulation of cell growth	82|2653	352|14725	0.00675473	0.108381	ENSG00000165140/ENSG00000198910/ENSG00000064205/ENSG00000143320/ENSG00000146674/ENSG00000175793/ENSG00000141753/ENSG00000006327/ENSG00000140961/ENSG00000107562/ENSG00000163220/ENSG00000001617/ENSG00000124762/ENSG00000171587/ENSG00000160211/ENSG00000078401/ENSG00000130303/ENSG00000129682/ENSG00000092969/ENSG00000099250/ENSG00000115457/ENSG00000112902/ENSG00000051523/ENSG00000185737/ENSG00000105695…	FBP1/L1CAM/WISP2/CRABP2/IGFBP3/SFN/IGFBP4/TNFRSF12A/OSGIN1/CXCL12/S100A9/SEMA3F/CDKN1A/DSCAM/G6PD/EDN1/BST2/FGF13/TGFB2/NRP1/IGFBP2/SEMA5A/CYBA/NRG3/MAG/BCL6/ARHGAP4/NRCAM/IGFBP5/RASAL1/FSTL4/KRT17/SLC9A1/RERG/OLFM1/ULK2/SERTAD3/CXCL16/S100A8/AKT1/CISH/HPN/PTPRJ/ADAM15/SERTAD1/FN1/CIB1/CDKN1B/CDHR2/NOV/SMAD3/H3F3B/PLXNA3/H3F3C/BCAR1/CTTN/SH3BP4/PLXNA4/KAZALD1/LAMTOR1/APBB2/RNF6/VEGFA/OSGIN2/RTN4R…	82
BP	GO:0007159	leukocyte cell-cell adhesion	63|2653	260|14725	0.00675636	0.108381	ENSG00000107485/ENSG00000131981/ENSG00000111679/ENSG00000164690/ENSG00000100097/ENSG00000026508/ENSG00000107562/ENSG00000090339/ENSG00000163220/ENSG00000179388/ENSG00000100219/ENSG00000124145/ENSG00000136826/ENSG00000131759/ENSG00000115457/ENSG00000160685/ENSG00000101144/ENSG00000010704/ENSG00000188372/ENSG00000113916/ENSG00000185338/ENSG00000102879/ENSG00000134258/ENSG00000145675/ENSG00000107099…	GATA3/LGALS3/PTPN6/SHH/LGALS1/CD44/CXCL12/ICAM1/S100A9/EGR3/XBP1/SDC4/KLF4/RARA/IGFBP2/ZBTB7B/BMP7/HFE/ZP3/BCL6/SOCS1/CORO1A/VTCN1/PIK3R1/DOCK8/HLA-DRB5/S100A8/MAP3K8/CAV1/CCR7/ZMIZ1/AKT1/CEBPB/CCL2/GCNT1/MYB/TSTA3/ASS1/CCL28/HLA-DRB1/GPNMB/CD47/IFNL1/TNFRSF21/SELE/IRF1/RASGRP1/ITGB7/HES1/MAP3K14/CD276/ADAM8/GRB2/CERCAM/EFNB2/SMAD7/PYCARD/CD5/SELL/RIPK2/ERBB2/VAV1/NPHS1	63
BP	GO:0022409	positive regulation of cell-cell adhesion	48|2653	189|14725	0.00676299	0.108381	ENSG00000129514/ENSG00000107485/ENSG00000111679/ENSG00000161905/ENSG00000164690/ENSG00000100097/ENSG00000026508/ENSG00000090339/ENSG00000179388/ENSG00000100219/ENSG00000131759/ENSG00000115457/ENSG00000101144/ENSG00000103335/ENSG00000188372/ENSG00000113916/ENSG00000185338/ENSG00000102879/ENSG00000134258/ENSG00000145675/ENSG00000107099/ENSG00000198502/ENSG00000128567/ENSG00000107968/ENSG00000070404…	FOXA1/GATA3/PTPN6/ALOX15/SHH/LGALS1/CD44/ICAM1/EGR3/XBP1/RARA/IGFBP2/BMP7/PIEZO1/ZP3/BCL6/SOCS1/CORO1A/VTCN1/PIK3R1/DOCK8/HLA-DRB5/PODXL/MAP3K8/FSTL3/CAV1/CCR7/ZMIZ1/DMTN/AKT1/CCL2/MYB/HLA-DRB1/CITED2/CD47/RASGRP1/HES1/MAP3K14/CD276/ADAM8/GRB2/EFNB2/SMAD7/PYCARD/CD5/RIPK2/VAV1/NPHS1	48
BP	GO:0030832	regulation of actin filament length	40|2653	152|14725	0.0067926	0.108547	ENSG00000124126/ENSG00000006747/ENSG00000161905/ENSG00000107562/ENSG00000090339/ENSG00000205542/ENSG00000248905/ENSG00000172830/ENSG00000112902/ENSG00000102879/ENSG00000148180/ENSG00000125753/ENSG00000106526/ENSG00000126353/ENSG00000172725/ENSG00000163932/ENSG00000158856/ENSG00000130429/ENSG00000015285/ENSG00000071127/ENSG00000101336/ENSG00000241553/ENSG00000204991/ENSG00000085733/ENSG00000130787…	PREX1/SCIN/ALOX15/CXCL12/ICAM1/TMSB4X/FMN1/SSH3/SEMA5A/CORO1A/GSN/VASP/ACTR3C/CCR7/CORO1B/PRKCD/DMTN/ARPC1B/WAS/WDR1/HCK/ARPC4/SPIRE2/CTTN/HIP1R/ARHGAP35/CCL26/MYO1C/CFL1/VIL1/BRK1/ARPC5L/TMOD3/GRB2/CYFIP1/MYADM/PYCARD/CAPG/WASL/NPHS1	40
BP	GO:0014745	negative regulation of muscle adaptation	6|2653	11|14725	0.0068589	0.108683	ENSG00000136826/ENSG00000115461/ENSG00000160789/ENSG00000140939/ENSG00000166949/ENSG00000207547	KLF4/IGFBP5/LMNA/NOL3/SMAD3/MIR25	6
BP	GO:0034310	primary alcohol catabolic process	6|2653	11|14725	0.0068589	0.108683	ENSG00000132746/ENSG00000006534/ENSG00000196139/ENSG00000196502/ENSG00000197165/ENSG00000198074	ALDH3B2/ALDH3B1/AKR1C3/SULT1A1/SULT1A2/AKR1B10	6
BP	GO:0051798	positive regulation of hair follicle development	6|2653	11|14725	0.0068589	0.108683	ENSG00000092969/ENSG00000128422/ENSG00000120149/ENSG00000102871/ENSG00000137497/ENSG00000109101	TGFB2/KRT17/MSX2/TRADD/NUMA1/FOXN1	6
BP	GO:0036293	response to decreased oxygen levels	78|2653	333|14725	0.00703304	0.11113	ENSG00000137801/ENSG00000165215/ENSG00000129993/ENSG00000095261/ENSG00000159167/ENSG00000116016/ENSG00000107562/ENSG00000167772/ENSG00000198125/ENSG00000090339/ENSG00000165272/ENSG00000183044/ENSG00000183734/ENSG00000078401/ENSG00000163636/ENSG00000092969/ENSG00000113739/ENSG00000101144/ENSG00000082482/ENSG00000051523/ENSG00000187848/ENSG00000160789/ENSG00000090020/ENSG00000140465/ENSG00000140939…	THBS1/CLDN3/CBFA2T3/PSMD5/STC1/EPAS1/CXCL12/ANGPTL4/MB/ICAM1/AQP3/ABAT/ASCL2/EDN1/PSMD6/TGFB2/STC2/BMP7/KCNK2/CYBA/P2RX2/LMNA/SLC9A1/CYP1A1/NOL3/TH/EGLN3/EGR1/NR4A2/PSMB10/ATP1B1/HILPDA/CXCR4/CAV1/ZFP36L1/AKT1/BBC3/MYB/TGFB3/DDIT4/FIS1/TLR2/CDKN1B/F7/SMAD3/HSD11B2/CITED2/VASN/KCNK3/PSME1/ALAD/CA9/SOD3/PSMA7/NOTCH1/ITPR1/PSMC5/LOXL2/VEGFA/CST3/TRPC6/UBC/PSME2/ADAM8/TMBIM6/ELOB/PSMD4/EGLN2/PKM/HMOX…	78
BP	GO:0002218	activation of innate immune response	61|2653	251|14725	0.00710786	0.111998	ENSG00000091831/ENSG00000189334/ENSG00000095261/ENSG00000172936/ENSG00000115267/ENSG00000117983/ENSG00000263528/ENSG00000163220/ENSG00000172551/ENSG00000163636/ENSG00000100906/ENSG00000125999/ENSG00000051523/ENSG00000161031/ENSG00000172243/ENSG00000164430/ENSG00000255690/ENSG00000185499/ENSG00000132256/ENSG00000104856/ENSG00000143546/ENSG00000205220/ENSG00000169894/ENSG00000105974/ENSG00000163932…	ESR1/S100A14/PSMD5/MYD88/IFIH1/MUC5B/IKBKE/S100A9/MUCL1/PSMD6/NFKBIA/BPIFB1/CYBA/PGLYRP2/CLEC7A/CGAS/TRIL/MUC1/TRIM5/RELB/S100A8/PSMB10/MUC3A/CAV1/PRKCD/FFAR2/ITGAM/MAPKAPK2/CARD9/TMEM173/TLR2/BIRC3/HCK/TICAM1/RFTN1/CNPY3/UNC93B1/PSME1/PSMA7/TNIP2/IRF1/RSAD2/PSMC5/NR1D1/UBC/IKBKG/PSME2/IRF3/DAB2IP/INAVA/PSMD4/HRAS/PGLYRP4/NOP53/DHX58/PYCARD/MAP3K1/RIPK2/UBE2V1/CTSB/PSMB4	61
BP	GO:0002675	positive regulation of acute inflammatory response	9|2653	21|14725	0.00719174	0.112378	ENSG00000050628/ENSG00000125730/ENSG00000188372/ENSG00000126353/ENSG00000126262/ENSG00000145623/ENSG00000164129/ENSG00000131187/ENSG00000151651	PTGER3/C3/ZP3/CCR7/FFAR2/OSMR/NPY5R/F12/ADAM8	9
BP	GO:0048846	axon extension involved in axon guidance	9|2653	21|14725	0.00719174	0.112378	ENSG00000107562/ENSG00000001617/ENSG00000171587/ENSG00000099250/ENSG00000112902/ENSG00000187122/ENSG00000130827/ENSG00000221866/ENSG00000112715	CXCL12/SEMA3F/DSCAM/NRP1/SEMA5A/SLIT1/PLXNA3/PLXNA4/VEGFA	9
BP	GO:1902284	neuron projection extension involved in neuron projection guidance	9|2653	21|14725	0.00719174	0.112378	ENSG00000107562/ENSG00000001617/ENSG00000171587/ENSG00000099250/ENSG00000112902/ENSG00000187122/ENSG00000130827/ENSG00000221866/ENSG00000112715	CXCL12/SEMA3F/DSCAM/NRP1/SEMA5A/SLIT1/PLXNA3/PLXNA4/VEGFA	9
BP	GO:0060541	respiratory system development	47|2653	185|14725	0.00725661	0.112848	ENSG00000124664/ENSG00000103067/ENSG00000129514/ENSG00000188064/ENSG00000106541/ENSG00000103196/ENSG00000176788/ENSG00000164690/ENSG00000116016/ENSG00000125968/ENSG00000144452/ENSG00000082175/ENSG00000005884/ENSG00000131759/ENSG00000139352/ENSG00000072310/ENSG00000176887/ENSG00000115461/ENSG00000083307/ENSG00000130702/ENSG00000172819/ENSG00000197461/ENSG00000127129/ENSG00000106397/ENSG00000184254…	SPDEF/ESRP2/FOXA1/WNT7B/AGR2/CRISPLD2/BASP1/SHH/EPAS1/ID1/ABCA12/PGR/ITGA3/RARA/ASCL1/SREBF1/SOX11/IGFBP5/GRHL2/LAMA5/RARG/PDGFA/EDN2/PLOD3/ALDH1A3/FSTL3/STRA6/TGFB3/MYCN/TNS3/ASS1/TBX4/HS6ST1/PPP1CA/CELSR1/NOTCH1/CTSH/FGFRL1/VEGFA/LIF/HES1/FGF18/DHCR7/DAG1/RAB3A/MAPK3/CIC	47
BP	GO:0001893	maternal placenta development	12|2653	32|14725	0.00726182	0.112848	ENSG00000159167/ENSG00000171223/ENSG00000182195/ENSG00000113739/ENSG00000186350/ENSG00000165474/ENSG00000142208/ENSG00000111424/ENSG00000164442/ENSG00000185551/ENSG00000128342/ENSG00000164733	STC1/JUNB/LDOC1/STC2/RXRA/GJB2/AKT1/VDR/CITED2/NR2F2/LIF/CTSB	12
BP	GO:0003158	endothelium development	29|2653	103|14725	0.00735579	0.113995	ENSG00000188064/ENSG00000172936/ENSG00000163347/ENSG00000159167/ENSG00000090339/ENSG00000125968/ENSG00000099250/ENSG00000213694/ENSG00000168874/ENSG00000130702/ENSG00000182871/ENSG00000106397/ENSG00000067182/ENSG00000143878/ENSG00000134202/ENSG00000158769/ENSG00000101384/ENSG00000185551/ENSG00000152939/ENSG00000166823/ENSG00000148400/ENSG00000119139/ENSG00000128917/ENSG00000105287/ENSG00000179820…	WNT7B/MYD88/CLDN1/STC1/ICAM1/ID1/NRP1/S1PR3/ATOH8/LAMA5/COL18A1/PLOD3/TNFRSF1A/RHOB/GSTM3/F11R/JAG1/NR2F2/MARVELD2/MESP1/NOTCH1/TJP2/DLL4/PRKD2/MYADM/EDF1/STARD13/CCM2/CDH5	29
BP	GO:1904894	positive regulation of STAT cascade	19|2653	60|14725	0.00738463	0.114128	ENSG00000178078/ENSG00000184557/ENSG00000138061/ENSG00000101213/ENSG00000138496/ENSG00000113494/ENSG00000173193/ENSG00000178568/ENSG00000175505/ENSG00000186891/ENSG00000067182/ENSG00000162891/ENSG00000006016/ENSG00000162892/ENSG00000135439/ENSG00000182393/ENSG00000148400/ENSG00000128342/ENSG00000114315	STAP2/SOCS3/CYP1B1/PTK6/PARP9/PRLR/PARP14/ERBB4/CLCF1/TNFRSF18/TNFRSF1A/IL20/CRLF1/IL24/AGAP2/IFNL1/NOTCH1/LIF/HES1	19
BP	GO:0051017	actin filament bundle assembly	35|2653	130|14725	0.00748135	0.115307	ENSG00000184292/ENSG00000111859/ENSG00000125968/ENSG00000173156/ENSG00000124145/ENSG00000171522/ENSG00000099250/ENSG00000136167/ENSG00000146904/ENSG00000171992/ENSG00000162552/ENSG00000050327/ENSG00000145675/ENSG00000090020/ENSG00000172403/ENSG00000187017/ENSG00000074964/ENSG00000172725/ENSG00000158856/ENSG00000140416/ENSG00000089159/ENSG00000186765/ENSG00000015285/ENSG00000119699/ENSG00000082781…	TACSTD2/NEDD9/ID1/RHOD/SDC4/PTGER4/NRP1/LCP1/EPHA1/SYNPO/WNT4/ARHGEF5/PIK3R1/SLC9A1/SYNPO2/ESPN/ARHGEF10L/CORO1B/DMTN/TPM1/PXN/FSCN2/WAS/TGFB3/ITGB5/SMAD3/SPIRE2/TESK1/ACTN1/VIL1/S100A10/MYO1B/ARRB1/LIMK1/ZYX	35
BP	GO:0030858	positive regulation of epithelial cell differentiation	18|2653	56|14725	0.00758925	0.116334	ENSG00000175793/ENSG00000088002/ENSG00000124151/ENSG00000175707/ENSG00000125618/ENSG00000168874/ENSG00000162891/ENSG00000111424/ENSG00000125850/ENSG00000137497/ENSG00000027075/ENSG00000166823/ENSG00000148400/ENSG00000109101/ENSG00000128342/ENSG00000106366/ENSG00000221926/ENSG00000179776	SFN/SULT2B1/NCOA3/KDF1/PAX8/ATOH8/IL20/VDR/OVOL2/NUMA1/PRKCH/MESP1/NOTCH1/FOXN1/LIF/SERPINE1/TRIM16/CDH5	18
BP	GO:0086003	cardiac muscle cell contraction	18|2653	56|14725	0.00758925	0.116334	ENSG00000159167/ENSG00000173801/ENSG00000162989/ENSG00000055118/ENSG00000130529/ENSG00000090020/ENSG00000105711/ENSG00000105974/ENSG00000080709/ENSG00000196924/ENSG00000057294/ENSG00000198929/ENSG00000171385/ENSG00000183230/ENSG00000096696/ENSG00000157388/ENSG00000049759/ENSG00000114279	STC1/JUP/KCNJ3/KCNH2/TRPM4/SLC9A1/SCN1B/CAV1/KCNN2/FLNA/PKP2/NOS1AP/KCND3/CTNNA3/DSP/CACNA1D/NEDD4L/FGF12	18
BP	GO:0002429	immune response-activating cell surface receptor signaling pathway	65|2653	271|14725	0.00762663	0.11659	ENSG00000107485/ENSG00000095261/ENSG00000131981/ENSG00000111679/ENSG00000117983/ENSG00000134830/ENSG00000101096/ENSG00000159216/ENSG00000172551/ENSG00000163636/ENSG00000100906/ENSG00000104783/ENSG00000172243/ENSG00000145675/ENSG00000163874/ENSG00000198502/ENSG00000185499/ENSG00000104856/ENSG00000205220/ENSG00000169894/ENSG00000126353/ENSG00000163932/ENSG00000130202/ENSG00000126262/ENSG00000130429…	GATA3/PSMD5/LGALS3/PTPN6/MUC5B/C5AR2/NFATC2/RUNX1/MUCL1/PSMD6/NFKBIA/KCNN4/CLEC7A/PIK3R1/ZC3H12A/HLA-DRB5/MUC1/RELB/PSMB10/MUC3A/CCR7/PRKCD/NECTIN2/FFAR2/ARPC1B/PTPRJ/CARD9/WAS/VAV2/PAX5/HCK/RNF31/HLA-DRB1/ARPC4/RFTN1/PSME1/BCAR1/PSMA7/PRKCH/TNFRSF21/MYO1C/ACTB/PSMC5/PHPT1/PLCG1/BRK1/LIME1/UBC/IKBKG/PSME2/LIMK1/GRB2/SPG21/PRKD2/CYFIP1/PSMD4/HRAS/VAV3/MAPK3/RIPK2/EIF2B5/UBE2V1/VAV1/PSMB4/WASL	65
BP	GO:0001885	endothelial cell development	17|2653	52|14725	0.00775094	0.117615	ENSG00000188064/ENSG00000172936/ENSG00000163347/ENSG00000159167/ENSG00000090339/ENSG00000125968/ENSG00000213694/ENSG00000182871/ENSG00000106397/ENSG00000067182/ENSG00000134202/ENSG00000158769/ENSG00000152939/ENSG00000119139/ENSG00000179820/ENSG00000136280/ENSG00000179776	WNT7B/MYD88/CLDN1/STC1/ICAM1/ID1/S1PR3/COL18A1/PLOD3/TNFRSF1A/GSTM3/F11R/MARVELD2/TJP2/MYADM/CCM2/CDH5	17
BP	GO:1903391	regulation of adherens junction organization	17|2653	52|14725	0.00775094	0.117615	ENSG00000137801/ENSG00000189058/ENSG00000141376/ENSG00000173156/ENSG00000248905/ENSG00000124145/ENSG00000099250/ENSG00000162552/ENSG00000090020/ENSG00000115109/ENSG00000158856/ENSG00000149177/ENSG00000166949/ENSG00000076826/ENSG00000112715/ENSG00000197747/ENSG00000084636	THBS1/APOD/BCAS3/RHOD/FMN1/SDC4/NRP1/WNT4/SLC9A1/EPB41L5/DMTN/PTPRJ/SMAD3/CAMSAP3/VEGFA/S100A10/COL16A1	17
BP	GO:2001235	positive regulation of apoptotic signaling pathway	43|2653	167|14725	0.00775624	0.117615	ENSG00000137801/ENSG00000175793/ENSG00000163083/ENSG00000006327/ENSG00000163220/ENSG00000176720/ENSG00000111321/ENSG00000100290/ENSG00000109062/ENSG00000165731/ENSG00000104689/ENSG00000104081/ENSG00000111907/ENSG00000164850/ENSG00000073282/ENSG00000148180/ENSG00000164938/ENSG00000143546/ENSG00000121858/ENSG00000016402/ENSG00000105974/ENSG00000015475/ENSG00000163932/ENSG00000100985/ENSG00000166289…	THBS1/SFN/INHBB/TNFRSF12A/S100A9/BOK/LTBR/BIK/SLC9A3R1/RET/TNFRSF10A/BMF/TPD52L1/GPER1/TP63/GSN/TP53INP1/S100A8/TNFSF10/IL20RA/CAV1/BID/PRKCD/MMP9/PLEKHF1/BBC3/NACC2/FIS1/WWOX/SMAD3/TRADD/DYNLL2/BCL2L1/DDIT3/TRAF7/HIP1R/PPP1CA/CTSH/CTNNA1/PPP1R13B/DAB2IP/INHBA/PYCARD	43
BP	GO:0071398	cellular response to fatty acid	16|2653	48|14725	0.00785498	0.118793	ENSG00000163347/ENSG00000151632/ENSG00000171631/ENSG00000196139/ENSG00000078401/ENSG00000171522/ENSG00000072310/ENSG00000110090/ENSG00000163874/ENSG00000142208/ENSG00000126262/ENSG00000130164/ENSG00000087460/ENSG00000130707/ENSG00000153823/ENSG00000174233	CLDN1/AKR1C2/P2RY6/AKR1C3/EDN1/PTGER4/SREBF1/CPT1A/ZC3H12A/AKT1/FFAR2/LDLR/GNAS/ASS1/PID1/ADCY6	16
BP	GO:1905475	regulation of protein localization to membrane	41|2653	158|14725	0.00798229	0.120252	ENSG00000175793/ENSG00000106541/ENSG00000118640/ENSG00000130762/ENSG00000005884/ENSG00000104081/ENSG00000164850/ENSG00000122679/ENSG00000073282/ENSG00000101040/ENSG00000148180/ENSG00000145675/ENSG00000169083/ENSG00000172061/ENSG00000015475/ENSG00000158856/ENSG00000170379/ENSG00000142208/ENSG00000169896/ENSG00000174827/ENSG00000105327/ENSG00000103888/ENSG00000214253/ENSG00000185043/ENSG00000142627…	SFN/AGR2/VAMP8/ARHGEF16/ITGA3/BMF/GPER1/RAMP3/TP63/ZMYND8/GSN/PIK3R1/AR/LRRC15/BID/DMTN/TCAF2/AKT1/ITGAM/PDZK1/BBC3/CEMIP/FIS1/CIB1/EPHA2/PID1/DYNLL2/BCL2L1/PRKCH/MYO1C/VIL1/AP2M1/LYPD1/PPP1R13B/SQSTM1/KCNJ11/MIEF2/AKT2/CLTC/ERBB2/TCAF1	41
BP	GO:0050729	positive regulation of inflammatory response	25|2653	86|14725	0.00799406	0.120252	ENSG00000118640/ENSG00000172936/ENSG00000163220/ENSG00000050628/ENSG00000171522/ENSG00000100906/ENSG00000125730/ENSG00000188372/ENSG00000143546/ENSG00000126353/ENSG00000067182/ENSG00000126262/ENSG00000145623/ENSG00000130164/ENSG00000163702/ENSG00000137462/ENSG00000127666/ENSG00000196776/ENSG00000164129/ENSG00000172458/ENSG00000131187/ENSG00000111199/ENSG00000151651/ENSG00000198959/ENSG00000106366	VAMP8/MYD88/S100A9/PTGER3/PTGER4/NFKBIA/C3/ZP3/S100A8/CCR7/TNFRSF1A/FFAR2/OSMR/LDLR/IL17RC/TLR2/TICAM1/CD47/NPY5R/IL17D/F12/TRPV4/ADAM8/TGM2/SERPINE1	25
BP	GO:0008037	cell recognition	32|2653	117|14725	0.00801982	0.120319	ENSG00000131981/ENSG00000143217/ENSG00000154654/ENSG00000171587/ENSG00000099250/ENSG00000188886/ENSG00000112902/ENSG00000204963/ENSG00000188372/ENSG00000091129/ENSG00000172243/ENSG00000182580/ENSG00000130702/ENSG00000086062/ENSG00000107099/ENSG00000112041/ENSG00000258484/ENSG00000126353/ENSG00000130202/ENSG00000170545/ENSG00000110400/ENSG00000113211/ENSG00000008300/ENSG00000134516/ENSG00000160007…	LGALS3/NECTIN4/NCAM2/DSCAM/NRP1/ASTL/SEMA5A/PCDHA7/ZP3/NRCAM/CLEC7A/EPHB3/LAMA5/B4GALT1/DOCK8/TULP1/SPESP1/CCR7/NECTIN2/SMAGP/NECTIN1/PCDHB6/CELSR3/DOCK2/ARHGAP35/CADM4/AMIGO1/CATSPERG/SCARB1/ADGRB1/CSGALNACT1/CD5	32
BP	GO:0030595	leukocyte chemotaxis	39|2653	149|14725	0.00818413	0.122134	ENSG00000137801/ENSG00000124126/ENSG00000189334/ENSG00000100311/ENSG00000131981/ENSG00000107562/ENSG00000163220/ENSG00000134830/ENSG00000078401/ENSG00000092969/ENSG00000130529/ENSG00000099377/ENSG00000102879/ENSG00000050327/ENSG00000161921/ENSG00000143546/ENSG00000127129/ENSG00000117115/ENSG00000121966/ENSG00000126353/ENSG00000126262/ENSG00000169429/ENSG00000108691/ENSG00000163702/ENSG00000102962…	THBS1/PREX1/S100A14/PDGFB/LGALS3/CXCL12/S100A9/C5AR2/EDN1/TGFB2/TRPM4/HSD3B7/CORO1A/ARHGEF5/CXCL16/S100A8/EDN2/PADI2/CXCR4/CCR7/FFAR2/CXCL8/CCL2/IL17RC/CCL22/NOV/F7/RARRES2/CCL20/CCL26/VEGFA/DAPK2/TRPV4/ADAM8/VAV3/MAPK3/SERPINE1/VAV1/VEGFC	39
BP	GO:2001242	regulation of intrinsic apoptotic signaling pathway	39|2653	149|14725	0.00818413	0.122134	ENSG00000144476/ENSG00000026508/ENSG00000107562/ENSG00000163220/ENSG00000176720/ENSG00000106211/ENSG00000109062/ENSG00000168398/ENSG00000100219/ENSG00000104081/ENSG00000161642/ENSG00000140939/ENSG00000185499/ENSG00000143546/ENSG00000120885/ENSG00000016402/ENSG00000105974/ENSG00000015475/ENSG00000142208/ENSG00000100985/ENSG00000166289/ENSG00000178719/ENSG00000105327/ENSG00000148411/ENSG00000214253…	ACKR3/CD44/CXCL12/S100A9/BOK/HSPB1/SLC9A3R1/BDKRB2/XBP1/BMF/ZNF385A/NOL3/MUC1/S100A8/CLU/IL20RA/CAV1/BID/AKT1/MMP9/PLEKHF1/GRINA/BBC3/NACC2/FIS1/BCL2L1/DDIT3/PTTG1IP/WFS1/DAPK2/ERP29/TMBIM6/ANKRD2/PTPN1/ELL3/SNAI1/PYCARD/P4HB/SYVN1	39
BP	GO:1900027	regulation of ruffle assembly	10|2653	25|14725	0.00830934	0.123675	ENSG00000184292/ENSG00000177106/ENSG00000090339/ENSG00000131037/ENSG00000105974/ENSG00000106078/ENSG00000035115/ENSG00000140995/ENSG00000273749/ENSG00000174775	TACSTD2/EPS8L2/ICAM1/EPS8L1/CAV1/COBL/SH3YL1/DEF8/CYFIP1/HRAS	10
BP	GO:0050921	positive regulation of chemotaxis	29|2653	104|14725	0.00848476	0.125954	ENSG00000137801/ENSG00000189334/ENSG00000100311/ENSG00000107562/ENSG00000106211/ENSG00000205542/ENSG00000171587/ENSG00000078401/ENSG00000099250/ENSG00000112902/ENSG00000140945/ENSG00000127129/ENSG00000126353/ENSG00000117407/ENSG00000169429/ENSG00000057593/ENSG00000166949/ENSG00000106538/ENSG00000135124/ENSG00000006606/ENSG00000112715/ENSG00000035664/ENSG00000111199/ENSG00000156427/ENSG00000105287…	THBS1/S100A14/PDGFB/CXCL12/HSPB1/TMSB4X/DSCAM/EDN1/NRP1/SEMA5A/CDH13/EDN2/CCR7/ARTN/CXCL8/F7/SMAD3/RARRES2/P2RX4/CCL26/VEGFA/DAPK2/TRPV4/FGF18/PRKD2/MAPK3/SERPINE1/VEGFC/NTRK3	29
BP	GO:0003206	cardiac chamber morphogenesis	31|2653	113|14725	0.00856247	0.126745	ENSG00000107485/ENSG00000121068/ENSG00000075223/ENSG00000092969/ENSG00000099250/ENSG00000131759/ENSG00000101144/ENSG00000186350/ENSG00000176887/ENSG00000179588/ENSG00000083307/ENSG00000104881/ENSG00000112414/ENSG00000159173/ENSG00000140416/ENSG00000120149/ENSG00000101384/ENSG00000125850/ENSG00000164442/ENSG00000057294/ENSG00000166823/ENSG00000096696/ENSG00000164129/ENSG00000148400/ENSG00000197702…	GATA3/TBX2/SEMA3C/TGFB2/NRP1/RARA/BMP7/RXRA/SOX11/ZFPM1/GRHL2/PPP1R13L/ADGRG6/TNNI1/TPM1/MSX2/JAG1/OVOL2/CITED2/PKP2/MESP1/DSP/NPY5R/NOTCH1/PARVA/FGFRL1/HES1/DLL4/SMAD6/CCM2L/SMAD7	31
BP	GO:0007413	axonal fasciculation	8|2653	18|14725	0.00863266	0.126745	ENSG00000154654/ENSG00000099250/ENSG00000112902/ENSG00000091129/ENSG00000182580/ENSG00000008300/ENSG00000160007/ENSG00000181754	NCAM2/NRP1/SEMA5A/NRCAM/EPHB3/CELSR3/ARHGAP35/AMIGO1	8
BP	GO:0030220	platelet formation	8|2653	18|14725	0.00863266	0.126745	ENSG00000111679/ENSG00000161642/ENSG00000179588/ENSG00000160796/ENSG00000100345/ENSG00000185043/ENSG00000071127/ENSG00000072110	PTPN6/ZNF385A/ZFPM1/NBEAL2/MYH9/CIB1/WDR1/ACTN1	8
BP	GO:0106030	neuron projection fasciculation	8|2653	18|14725	0.00863266	0.126745	ENSG00000154654/ENSG00000099250/ENSG00000112902/ENSG00000091129/ENSG00000182580/ENSG00000008300/ENSG00000160007/ENSG00000181754	NCAM2/NRP1/SEMA5A/NRCAM/EPHB3/CELSR3/ARHGAP35/AMIGO1	8
BP	GO:1905330	regulation of morphogenesis of an epithelium	43|2653	168|14725	0.00865042	0.126745	ENSG00000091831/ENSG00000184292/ENSG00000107485/ENSG00000107984/ENSG00000095261/ENSG00000158055/ENSG00000164690/ENSG00000121068/ENSG00000142632/ENSG00000102981/ENSG00000163637/ENSG00000163636/ENSG00000125618/ENSG00000101144/ENSG00000162552/ENSG00000186350/ENSG00000143126/ENSG00000074527/ENSG00000169083/ENSG00000196581/ENSG00000197461/ENSG00000186193/ENSG00000205220/ENSG00000244405/ENSG00000008300…	ESR1/TACSTD2/GATA3/DKK1/PSMD5/GRHL3/SHH/TBX2/ARHGEF19/PARD6A/PRICKLE2/PSMD6/PAX8/BMP7/WNT4/RXRA/CELSR2/NTN4/AR/AJAP1/PDGFA/SAPCD2/PSMB10/ETV5/CELSR3/PSME1/PSMA7/CELSR1/PSMC5/VEGFA/AP2M1/LIF/AP2S1/UBC/PSME2/PSMD4/DAAM1/VANGL1/CLTC/DVL3/SMURF1/FZD5/PSMB4	43
BP	GO:0050678	regulation of epithelial cell proliferation	69|2653	292|14725	0.00875257	0.127893	ENSG00000137801/ENSG00000103067/ENSG00000184292/ENSG00000107485/ENSG00000062038/ENSG00000175793/ENSG00000100311/ENSG00000164690/ENSG00000140832/ENSG00000198753/ENSG00000107562/ENSG00000163235/ENSG00000196562/ENSG00000125968/ENSG00000134830/ENSG00000175707/ENSG00000082175/ENSG00000179388/ENSG00000100219/ENSG00000092969/ENSG00000099250/ENSG00000112902/ENSG00000110092/ENSG00000168874/ENSG00000051523…	THBS1/ESRP2/TACSTD2/GATA3/CDH3/SFN/PDGFB/SHH/MARVELD3/PLXNB3/CXCL12/TGFA/SULF2/ID1/C5AR2/KDF1/PGR/EGR3/XBP1/TGFB2/NRP1/SEMA5A/CCND1/ATOH8/CYBA/CDH13/SOX11/TP63/AR/LRG1/B4GALT1/OSR2/STAT5A/RAP1GAP/CAV1/ZFP36L1/AKT1/HPN/EGFL7/VDR/SLURP1/CDKN1B/AGAP2/SMAD3/BCL11B/OVOL2/PTPRK/NGFR/NR2F2/SERPINB5/KRT4/NOTCH1/CCL26/CDKN2B/PDCD6/VEGFA/NR1D1/HES1/DLL4/DAB2IP/PRKD2/HRAS/KDM5B/EFNB2/CAV2/IFT122/ERBB2/NR4A1…	69
BP	GO:0030041	actin filament polymerization	38|2653	145|14725	0.0087741	0.127893	ENSG00000124126/ENSG00000006747/ENSG00000161905/ENSG00000090339/ENSG00000205542/ENSG00000248905/ENSG00000102879/ENSG00000164877/ENSG00000148180/ENSG00000125753/ENSG00000106526/ENSG00000126353/ENSG00000172725/ENSG00000163932/ENSG00000158856/ENSG00000106078/ENSG00000130429/ENSG00000015285/ENSG00000101336/ENSG00000241553/ENSG00000204991/ENSG00000085733/ENSG00000130787/ENSG00000006606/ENSG00000197879…	PREX1/SCIN/ALOX15/ICAM1/TMSB4X/FMN1/CORO1A/MICALL2/GSN/VASP/ACTR3C/CCR7/CORO1B/PRKCD/DMTN/COBL/ARPC1B/WAS/HCK/ARPC4/SPIRE2/CTTN/HIP1R/CCL26/MYO1C/VIL1/MSRB2/BRK1/ARPC5L/TMOD3/GRB2/CYFIP1/MYADM/PYCARD/CAPG/COBLL1/WASL/NPHS1	38
BP	GO:0043010	camera-type eye development	64|2653	268|14725	0.00889538	0.129327	ENSG00000107485/ENSG00000188064/ENSG00000158055/ENSG00000164690/ENSG00000138061/ENSG00000121068/ENSG00000146950/ENSG00000171587/ENSG00000165731/ENSG00000131669/ENSG00000115380/ENSG00000087085/ENSG00000136826/ENSG00000092969/ENSG00000099250/ENSG00000184564/ENSG00000131759/ENSG00000182704/ENSG00000101144/ENSG00000186350/ENSG00000176887/ENSG00000083307/ENSG00000163349/ENSG00000140465/ENSG00000172819…	GATA3/WNT7B/GRHL3/SHH/CYP1B1/TBX2/SHROOM2/DSCAM/RET/NINJ1/EFEMP1/ACHE/KLF4/TGFB2/NRP1/SLITRK6/RARA/TSKU/BMP7/RXRA/SOX11/GRHL2/HIPK1/CYP1A1/RARG/TH/OSR2/PPP1R13L/DIO3/TULP1/ALDH1A3/BCAR3/STRA6/TFAP2A/CDKN1B/NECTIN1/IRX5/SLC25A25/JAG1/EPHA2/VIM/SMAD3/BCL11B/CITED2/LAMB2/LRP5/ARHGAP35/HSF4/WNT9A/VEGFA/NES/EGF/C12orf57/DLL4/INHBA/KDM5B/ROM1/GNAT1/CLCN2/PFDN5/IFT122/FZD5/FKBP8/NTRK3	64
BP	GO:0042445	hormone metabolic process	45|2653	178|14725	0.00927965	0.134439	ENSG00000091831/ENSG00000129514/ENSG00000107485/ENSG00000143320/ENSG00000164690/ENSG00000138061/ENSG00000100867/ENSG00000151632/ENSG00000196139/ENSG00000087085/ENSG00000196557/ENSG00000113739/ENSG00000166426/ENSG00000125618/ENSG00000162552/ENSG00000211448/ENSG00000010704/ENSG00000187134/ENSG00000140465/ENSG00000197406/ENSG00000120738/ENSG00000241635/ENSG00000115705/ENSG00000184254/ENSG00000124496…	ESR1/FOXA1/GATA3/CRABP2/SHH/CYP1B1/DHRS2/AKR1C2/AKR1C3/ACHE/CACNA1H/STC2/CRABP1/PAX8/WNT4/DIO2/HFE/AKR1C1/CYP1A1/DIO3/EGR1/UGT1A1/TPO/ALDH1A3/TRERF1/HPN/C9orf3/VDR/SDR16C5/COMT/KLK6/HSD11B2/CPQ/SULT1A1/POR/TTR/FURIN/BCO1/AKR1B15/DHCR7/SCARB1/SLC5A5/ECE1/CGA/REN	45
BP	GO:0021782	glial cell development	25|2653	87|14725	0.00934233	0.134439	ENSG00000164690/ENSG00000103089/ENSG00000163220/ENSG00000010278/ENSG00000184845/ENSG00000149256/ENSG00000139352/ENSG00000176887/ENSG00000105695/ENSG00000148180/ENSG00000112414/ENSG00000169247/ENSG00000143546/ENSG00000120885/ENSG00000142208/ENSG00000130164/ENSG00000137462/ENSG00000026025/ENSG00000146216/ENSG00000172037/ENSG00000163517/ENSG00000100429/ENSG00000173402/ENSG00000105221/ENSG00000145191	SHH/FA2H/S100A9/CD9/DRD1/TENM4/ASCL1/SOX11/MAG/GSN/ADGRG6/SH3TC2/S100A8/CLU/AKT1/LDLR/TLR2/VIM/TTBK1/LAMB2/HDAC11/HDAC10/DAG1/AKT2/EIF2B5	25
BP	GO:0033559	unsaturated fatty acid metabolic process	25|2653	87|14725	0.00934233	0.134439	ENSG00000161905/ENSG00000138061/ENSG00000151632/ENSG00000074416/ENSG00000196139/ENSG00000078401/ENSG00000106853/ENSG00000095303/ENSG00000168907/ENSG00000148344/ENSG00000140465/ENSG00000117480/ENSG00000127129/ENSG00000067182/ENSG00000060971/ENSG00000165591/ENSG00000101986/ENSG00000221968/ENSG00000255974/ENSG00000148334/ENSG00000105499/ENSG00000186526/ENSG00000161533/ENSG00000101473/ENSG00000102882	ALOX15/CYP1B1/AKR1C2/MGLL/AKR1C3/EDN1/PTGR1/PTGS1/PLA2G4F/PTGES/CYP1A1/FAAH/EDN2/TNFRSF1A/ACAA1/FAAH2/ABCD1/FADS3/CYP2A6/PTGES2/PLA2G4C/CYP4F8/ACOX1/ACOT8/MAPK3	25
BP	GO:0042107	cytokine metabolic process	25|2653	87|14725	0.00934233	0.134439	ENSG00000137801/ENSG00000107485/ENSG00000163083/ENSG00000069399/ENSG00000172936/ENSG00000106211/ENSG00000128016/ENSG00000136826/ENSG00000179588/ENSG00000120738/ENSG00000123999/ENSG00000172216/ENSG00000123609/ENSG00000185187/ENSG00000162889/ENSG00000187796/ENSG00000127666/ENSG00000115009/ENSG00000125347/ENSG00000103855/ENSG00000181634/ENSG00000197272/ENSG00000126456/ENSG00000122641/ENSG00000069020	THBS1/GATA3/INHBB/BCL3/MYD88/HSPB1/ZFP36/KLF4/ZFPM1/EGR1/INHA/CEBPB/NMI/SIGIRR/MAPKAPK2/CARD9/TICAM1/CCL20/IRF1/CD276/TNFSF15/IL27/IRF3/INHBA/MAST4	25
BP	GO:0032233	positive regulation of actin filament bundle assembly	17|2653	53|14725	0.00953678	0.136541	ENSG00000125968/ENSG00000124145/ENSG00000099250/ENSG00000146904/ENSG00000171992/ENSG00000162552/ENSG00000050327/ENSG00000172403/ENSG00000074964/ENSG00000140416/ENSG00000089159/ENSG00000119699/ENSG00000166949/ENSG00000107140/ENSG00000127831/ENSG00000197747/ENSG00000106683	ID1/SDC4/NRP1/EPHA1/SYNPO/WNT4/ARHGEF5/SYNPO2/ARHGEF10L/TPM1/PXN/TGFB3/SMAD3/TESK1/VIL1/S100A10/LIMK1	17
BP	GO:0046888	negative regulation of hormone secretion	17|2653	53|14725	0.00953678	0.136541	ENSG00000163083/ENSG00000078401/ENSG00000169047/ENSG00000072310/ENSG00000123999/ENSG00000138814/ENSG00000274286/ENSG00000136999/ENSG00000141959/ENSG00000167470/ENSG00000198355/ENSG00000121671/ENSG00000128342/ENSG00000184160/ENSG00000187486/ENSG00000122641/ENSG00000095752	INHBB/EDN1/IRS1/SREBF1/INHA/PPP3CA/ADRA2B/NOV/PFKL/MIDN/PIM3/CRY2/LIF/ADRA2C/KCNJ11/INHBA/IL11	17
BP	GO:0022408	negative regulation of cell-cell adhesion	35|2653	132|14725	0.00959008	0.136956	ENSG00000039068/ENSG00000119888/ENSG00000131981/ENSG00000167642/ENSG00000111679/ENSG00000164690/ENSG00000107562/ENSG00000010278/ENSG00000183044/ENSG00000197971/ENSG00000124145/ENSG00000136826/ENSG00000160685/ENSG00000010704/ENSG00000113916/ENSG00000134258/ENSG00000128567/ENSG00000115109/ENSG00000163932/ENSG00000172216/ENSG00000130707/ENSG00000151882/ENSG00000101384/ENSG00000196126/ENSG00000136235…	CDH1/EPCAM/LGALS3/SPINT2/PTPN6/SHH/CXCL12/CD9/ABAT/MBP/SDC4/KLF4/ZBTB7B/HFE/BCL6/VTCN1/PODXL/EPB41L5/PRKCD/CEBPB/ASS1/CCL28/JAG1/HLA-DRB1/GPNMB/IFNL1/TNFRSF21/IRF1/TRPV4/MYADM/IL1RN/CCM2L/B4GALNT2/SMAD7/ERBB2	35
BP	GO:0048662	negative regulation of smooth muscle cell proliferation	13|2653	37|14725	0.00984316	0.139862	ENSG00000146674/ENSG00000189058/ENSG00000136826/ENSG00000113389/ENSG00000164850/ENSG00000115461/ENSG00000106018/ENSG00000140416/ENSG00000119699/ENSG00000093010/ENSG00000111276/ENSG00000103034/ENSG00000178585	IGFBP3/APOD/KLF4/NPR3/GPER1/IGFBP5/VIPR2/TPM1/TGFB3/COMT/CDKN1B/NDRG4/CTNNBIP1	13
BP	GO:1901186	positive regulation of ERBB signaling pathway	13|2653	37|14725	0.00984316	0.139862	ENSG00000106541/ENSG00000101213/ENSG00000163235/ENSG00000164850/ENSG00000142208/ENSG00000100985/ENSG00000274286/ENSG00000130787/ENSG00000169129/ENSG00000184160/ENSG00000138798/ENSG00000150991/ENSG00000160410	AGR2/PTK6/TGFA/GPER1/AKT1/MMP9/ADRA2B/HIP1R/AFAP1L2/ADRA2C/EGF/UBC/SHKBP1	13
BP	GO:0042093	T-helper cell differentiation	15|2653	45|14725	0.00989597	0.139908	ENSG00000107485/ENSG00000069399/ENSG00000156127/ENSG00000171522/ENSG00000131759/ENSG00000160685/ENSG00000113916/ENSG00000196189/ENSG00000179588/ENSG00000104856/ENSG00000143365/ENSG00000118513/ENSG00000197272/ENSG00000101665/ENSG00000104312	GATA3/BCL3/BATF/PTGER4/RARA/ZBTB7B/BCL6/SEMA4A/ZFPM1/RELB/RORC/MYB/IL27/SMAD7/RIPK2	15
BP	GO:1903307	positive regulation of regulated secretory pathway	15|2653	45|14725	0.00989597	0.139908	ENSG00000092929/ENSG00000118640/ENSG00000011347/ENSG00000196557/ENSG00000110975/ENSG00000188372/ENSG00000033327/ENSG00000105514/ENSG00000169896/ENSG00000100346/ENSG00000139998/ENSG00000106089/ENSG00000198794/ENSG00000185896/ENSG00000105649	UNC13D/VAMP8/SYT7/CACNA1H/SYT10/ZP3/GAB2/RAB3D/ITGAM/CACNA1I/RAB15/STX1A/SCAMP5/LAMP1/RAB3A	15
BP	GO:0045747	positive regulation of Notch signaling pathway	14|2653	41|14725	0.00993652	0.14013	ENSG00000163435/ENSG00000106003/ENSG00000092969/ENSG00000139352/ENSG00000073282/ENSG00000108175/ENSG00000108219/ENSG00000136999/ENSG00000101384/ENSG00000184916/ENSG00000166823/ENSG00000148400/ENSG00000114315/ENSG00000128917	ELF3/LFNG/TGFB2/ASCL1/TP63/ZMIZ1/TSPAN14/NOV/JAG1/JAG2/MESP1/NOTCH1/HES1/DLL4	14
BP	GO:0048486	parasympathetic nervous system development	7|2653	15|14725	0.0101829	0.143247	ENSG00000001617/ENSG00000099250/ENSG00000137203/ENSG00000130827/ENSG00000221866/ENSG00000114315/ENSG00000197381	SEMA3F/NRP1/TFAP2A/PLXNA3/PLXNA4/HES1/ADARB1	7
BP	GO:0050927	positive regulation of positive chemotaxis	9|2653	22|14725	0.0102551	0.143546	ENSG00000107562/ENSG00000140945/ENSG00000117407/ENSG00000169429/ENSG00000057593/ENSG00000166949/ENSG00000112715/ENSG00000150630/ENSG00000140538	CXCL12/CDH13/ARTN/CXCL8/F7/SMAD3/VEGFA/VEGFC/NTRK3	9
BP	GO:0086011	membrane repolarization during action potential	9|2653	22|14725	0.0102551	0.143546	ENSG00000162989/ENSG00000055118/ENSG00000167535/ENSG00000143153/ENSG00000105974/ENSG00000080709/ENSG00000196924/ENSG00000198929/ENSG00000171385	KCNJ3/KCNH2/CACNB3/ATP1B1/CAV1/KCNN2/FLNA/NOS1AP/KCND3	9
BP	GO:0006333	chromatin assembly or disassembly	42|2653	165|14725	0.0103375	0.14363	ENSG00000180543/ENSG00000184678/ENSG00000273802/ENSG00000158373/ENSG00000278828/ENSG00000158406/ENSG00000180596/ENSG00000273983/ENSG00000124635/ENSG00000178685/ENSG00000275713/ENSG00000197903/ENSG00000203814/ENSG00000197837/ENSG00000277224/ENSG00000108604/ENSG00000117115/ENSG00000274267/ENSG00000187837/ENSG00000183598/ENSG00000273542/ENSG00000122390/ENSG00000270276/ENSG00000132475/ENSG00000188375…	TSPYL5/HIST2H2BE/HIST1H2BG/HIST1H2BD/HIST1H3H/HIST1H4H/HIST1H2BC/HIST1H3G/HIST1H2BJ/PARP10/HIST1H2BH/HIST1H2BK/HIST2H2BF/HIST4H4/HIST1H2BF/SMARCD2/PADI2/HIST1H3B/HIST1H1C/HIST2H3D/HIST1H4K/NAA60/HIST2H4B/H3F3B/H3F3C/HIST1H3A/HIST1H1D/HIST1H2BN/HIST1H2BL/HIST1H2BE/HIST1H3E/HIST1H2BI/TNRC18/H2AFX/HIST3H2A/TSPYL4/HIST1H4I/CENPX/HIST1H2BO/HIST2H4A/ARID2/HIST1H3J	42
BP	GO:0007179	transforming growth factor beta receptor signaling pathway	42|2653	165|14725	0.0103375	0.14363	ENSG00000137801/ENSG00000130513/ENSG00000095739/ENSG00000124225/ENSG00000168542/ENSG00000186174/ENSG00000125968/ENSG00000242265/ENSG00000005884/ENSG00000102981/ENSG00000168743/ENSG00000170345/ENSG00000092969/ENSG00000176887/ENSG00000155090/ENSG00000143375/ENSG00000171236/ENSG00000105974/ENSG00000089159/ENSG00000158769/ENSG00000119699/ENSG00000110195/ENSG00000168675/ENSG00000082781/ENSG00000166949…	THBS1/GDF15/BAMBI/PMEPA1/COL3A1/BCL9L/ID1/PEG10/ITGA3/PARD6A/NPNT/FOS/TGFB2/SOX11/KLF10/CGN/LRG1/CAV1/PXN/F11R/TGFB3/FOLR1/LDLRAD4/ITGB5/SMAD3/PTPRK/CITED2/VASN/GIPC1/WFIKKN1/CDKN2B/FURIN/UBC/TRIM33/ZYX/SMAD6/GLG1/SMAD7/ONECUT1/CAV2/SMURF1/CDH5	42
BP	GO:0030323	respiratory tube development	42|2653	165|14725	0.0103375	0.14363	ENSG00000124664/ENSG00000103067/ENSG00000129514/ENSG00000188064/ENSG00000106541/ENSG00000103196/ENSG00000164690/ENSG00000116016/ENSG00000125968/ENSG00000144452/ENSG00000082175/ENSG00000005884/ENSG00000139352/ENSG00000072310/ENSG00000176887/ENSG00000115461/ENSG00000083307/ENSG00000130702/ENSG00000197461/ENSG00000127129/ENSG00000106397/ENSG00000070404/ENSG00000137868/ENSG00000119699/ENSG00000076604…	SPDEF/ESRP2/FOXA1/WNT7B/AGR2/CRISPLD2/SHH/EPAS1/ID1/ABCA12/PGR/ITGA3/ASCL1/SREBF1/SOX11/IGFBP5/GRHL2/LAMA5/PDGFA/EDN2/PLOD3/FSTL3/STRA6/TGFB3/TRAF4/MYCN/TNS3/TBX4/HS6ST1/PPP1CA/CELSR1/NOTCH1/CTSH/VEGFA/LIF/HES1/FGF18/DHCR7/DAG1/RAB3A/MAPK3/CIC	42
BP	GO:1903707	negative regulation of hemopoiesis	32|2653	119|14725	0.0104035	0.144192	ENSG00000119714/ENSG00000164690/ENSG00000158406/ENSG00000128016/ENSG00000100906/ENSG00000131759/ENSG00000160685/ENSG00000113916/ENSG00000161031/ENSG00000179588/ENSG00000145675/ENSG00000197837/ENSG00000123999/ENSG00000070404/ENSG00000185650/ENSG00000185043/ENSG00000273542/ENSG00000166477/ENSG00000270276/ENSG00000182393/ENSG00000148400/ENSG00000172458/ENSG00000125347/ENSG00000114315/ENSG00000130584…	GPR68/SHH/HIST1H4H/ZFP36/NFKBIA/RARA/ZBTB7B/BCL6/PGLYRP2/ZFPM1/PIK3R1/HIST4H4/INHA/FSTL3/ZFP36L1/CIB1/HIST1H4K/LEO1/HIST2H4B/IFNL1/NOTCH1/IL17D/IRF1/HES1/ZBTB46/HIST1H4I/INHBA/MAFB/SMAD7/HIST2H4A/ERBB2/PRMT1	32
BP	GO:0071621	granulocyte chemotaxis	23|2653	79|14725	0.0104677	0.144726	ENSG00000137801/ENSG00000124126/ENSG00000189334/ENSG00000131981/ENSG00000163220/ENSG00000134830/ENSG00000078401/ENSG00000092969/ENSG00000143546/ENSG00000127129/ENSG00000126353/ENSG00000169429/ENSG00000108691/ENSG00000163702/ENSG00000102962/ENSG00000106538/ENSG00000115009/ENSG00000006606/ENSG00000035664/ENSG00000111199/ENSG00000134215/ENSG00000102882/ENSG00000141968	THBS1/PREX1/S100A14/LGALS3/S100A9/C5AR2/EDN1/TGFB2/S100A8/EDN2/CCR7/CXCL8/CCL2/IL17RC/CCL22/RARRES2/CCL20/CCL26/DAPK2/TRPV4/VAV3/MAPK3/VAV1	23
BP	GO:0071347	cellular response to interleukin-1	37|2653	142|14725	0.0105679	0.145754	ENSG00000095261/ENSG00000172936/ENSG00000090339/ENSG00000115594/ENSG00000078401/ENSG00000185386/ENSG00000163636/ENSG00000100906/ENSG00000163874/ENSG00000120738/ENSG00000003436/ENSG00000205220/ENSG00000107968/ENSG00000172216/ENSG00000169429/ENSG00000108691/ENSG00000102962/ENSG00000092010/ENSG00000115009/ENSG00000101182/ENSG00000006606/ENSG00000168884/ENSG00000087191/ENSG00000162302/ENSG00000150991…	PSMD5/MYD88/ICAM1/IL1R1/EDN1/MAPK11/PSMD6/NFKBIA/ZC3H12A/EGR1/TFPI/PSMB10/MAP3K8/CEBPB/CXCL8/CCL2/CCL22/PSME1/CCL20/PSMA7/CCL26/TNIP2/PSMC5/RPS6KA4/UBC/IKBKG/PSME2/DAB2IP/SQSTM1/IL1RN/PSMD4/OTUB1/PYCARD/MAPK3/RIPK2/UBE2V1/PSMB4	37
BP	GO:0007259	JAK-STAT cascade	35|2653	133|14725	0.0108153	0.148507	ENSG00000069399/ENSG00000178078/ENSG00000184557/ENSG00000185924/ENSG00000138061/ENSG00000101213/ENSG00000138496/ENSG00000113494/ENSG00000173193/ENSG00000178568/ENSG00000165731/ENSG00000175505/ENSG00000185338/ENSG00000186891/ENSG00000126561/ENSG00000132000/ENSG00000172061/ENSG00000198739/ENSG00000105974/ENSG00000067182/ENSG00000114737/ENSG00000162891/ENSG00000123609/ENSG00000006016/ENSG00000108691…	BCL3/STAP2/SOCS3/RTN4RL1/CYP1B1/PTK6/PARP9/PRLR/PARP14/ERBB4/RET/CLCF1/SOCS1/TNFRSF18/STAT5A/PODNL1/LRRC15/LRRTM3/CAV1/TNFRSF1A/CISH/IL20/NMI/CRLF1/CCL2/IL24/AGAP2/IFNL1/NOTCH1/LIF/HES1/RTN4R/LRRC4/PTPN1/MAPK3	35
BP	GO:0050865	regulation of cell activation	96|2653	428|14725	0.0108559	0.148507	ENSG00000137801/ENSG00000107485/ENSG00000092929/ENSG00000100311/ENSG00000076242/ENSG00000131981/ENSG00000118640/ENSG00000172936/ENSG00000111679/ENSG00000164690/ENSG00000100097/ENSG00000178726/ENSG00000010278/ENSG00000183044/ENSG00000124762/ENSG00000101096/ENSG00000179388/ENSG00000100219/ENSG00000159216/ENSG00000124145/ENSG00000175505/ENSG00000131759/ENSG00000115457/ENSG00000170476/ENSG00000160685…	THBS1/GATA3/UNC13D/PDGFB/MLH1/LGALS3/VAMP8/MYD88/PTPN6/SHH/LGALS1/THBD/CD9/ABAT/CDKN1A/NFATC2/EGR3/XBP1/RUNX1/SDC4/CLCF1/RARA/IGFBP2/MZB1/ZBTB7B/GPER1/HFE/ZP3/SOX11/BCL6/SOCS1/CORO1A/VTCN1/PGLYRP2/TNFRSF18/GSN/PIK3R1/ZC3H12A/DOCK8/PDGFA/ZFP36L2/HLA-DRB5/GAB2/BANK1/INHA/MAP3K8/CAV1/CCR7/ZFP36L1/ZMIZ1/PRKCD/DMTN/AKT1/NECTIN2/CEBPB/ITGAM/CCL2/LDLR/MYB/TICAM1/SOX13/HLA-DRB1/TTBK1/SLC7A2/ABR/GPNMB/CD4…	96
BP	GO:0045446	endothelial cell differentiation	25|2653	88|14725	0.01087	0.148507	ENSG00000188064/ENSG00000172936/ENSG00000163347/ENSG00000159167/ENSG00000090339/ENSG00000125968/ENSG00000099250/ENSG00000213694/ENSG00000168874/ENSG00000130702/ENSG00000182871/ENSG00000106397/ENSG00000067182/ENSG00000134202/ENSG00000158769/ENSG00000101384/ENSG00000185551/ENSG00000152939/ENSG00000166823/ENSG00000148400/ENSG00000119139/ENSG00000179820/ENSG00000107223/ENSG00000136280/ENSG00000179776	WNT7B/MYD88/CLDN1/STC1/ICAM1/ID1/NRP1/S1PR3/ATOH8/LAMA5/COL18A1/PLOD3/TNFRSF1A/GSTM3/F11R/JAG1/NR2F2/MARVELD2/MESP1/NOTCH1/TJP2/MYADM/EDF1/CCM2/CDH5	25
BP	GO:0044089	positive regulation of cellular component biogenesis	101|2653	453|14725	0.0108728	0.148507	ENSG00000091831/ENSG00000116299/ENSG00000006747/ENSG00000177106/ENSG00000161905/ENSG00000163347/ENSG00000141376/ENSG00000158258/ENSG00000090339/ENSG00000125968/ENSG00000100290/ENSG00000131037/ENSG00000078401/ENSG00000248905/ENSG00000124145/ENSG00000188157/ENSG00000099250/ENSG00000104081/ENSG00000136167/ENSG00000184564/ENSG00000115884/ENSG00000146904/ENSG00000171992/ENSG00000101144/ENSG00000103335…	ESR1/KIAA1324/SCIN/EPS8L2/ALOX15/CLDN1/BCAS3/CLSTN2/ICAM1/ID1/BIK/EPS8L1/EDN1/FMN1/SDC4/AGRN/NRP1/BMF/LCP1/SLITRK6/SDC1/EPHA1/SYNPO/BMP7/PIEZO1/LRRN1/WNT4/CORO1A/ZMYND8/GSN/ARHGEF5/EPHB3/SYNPO2/SLITRK4/ESPN/VASP/ACTR3C/ARHGEF10L/EPB41L5/CLU/LRRTM3/CAV1/CCR7/CORO1B/BID/COBL/TPM1/ARPC1B/RHOC/PTPRJ/PXN/BBC3/NR1H2/WAS/TGFB3/CDKN1B/SEPT9/HCK/SMAD3/TTBK1/ARPC4/SPIRE2/CTTN/SMPD3/LRSAM1/NUMA1/HIP1R/FOSL1…	101
BP	GO:0030516	regulation of axon extension	22|2653	75|14725	0.0110579	0.150512	ENSG00000198910/ENSG00000006327/ENSG00000107562/ENSG00000001617/ENSG00000171587/ENSG00000099250/ENSG00000112902/ENSG00000105695/ENSG00000089820/ENSG00000091129/ENSG00000130558/ENSG00000115414/ENSG00000130827/ENSG00000085733/ENSG00000221866/ENSG00000127870/ENSG00000112715/ENSG00000040608/ENSG00000106683/ENSG00000273749/ENSG00000008086/ENSG00000140538	L1CAM/TNFRSF12A/CXCL12/SEMA3F/DSCAM/NRP1/SEMA5A/MAG/ARHGAP4/NRCAM/OLFM1/FN1/PLXNA3/CTTN/PLXNA4/RNF6/VEGFA/RTN4R/LIMK1/CYFIP1/CDKL5/NTRK3	22
BP	GO:0014902	myotube differentiation	27|2653	97|14725	0.0110924	0.150512	ENSG00000138119/ENSG00000130513/ENSG00000164690/ENSG00000101096/ENSG00000100219/ENSG00000196557/ENSG00000187848/ENSG00000112183/ENSG00000164976/ENSG00000136830/ENSG00000138814/ENSG00000187957/ENSG00000105388/ENSG00000100345/ENSG00000136999/ENSG00000142178/ENSG00000148400/ENSG00000110047/ENSG00000132819/ENSG00000104936/ENSG00000104177/ENSG00000134243/ENSG00000165887/ENSG00000181790/ENSG00000105971…	MYOF/GDF15/SHH/NFATC2/XBP1/CACNA1H/P2RX2/RBM24/MYORG/FAM129B/PPP3CA/DNER/CEACAM5/MYH9/NOV/SIK1/NOTCH1/EHD1/RBM38/DMPK/MYEF2/SORT1/ANKRD2/ADGRB1/CAV2/EHD2/NPHS1	27
BP	GO:0030324	lung development	41|2653	161|14725	0.0110996	0.150512	ENSG00000124664/ENSG00000103067/ENSG00000129514/ENSG00000188064/ENSG00000106541/ENSG00000103196/ENSG00000164690/ENSG00000116016/ENSG00000125968/ENSG00000144452/ENSG00000082175/ENSG00000005884/ENSG00000139352/ENSG00000072310/ENSG00000176887/ENSG00000115461/ENSG00000083307/ENSG00000130702/ENSG00000197461/ENSG00000127129/ENSG00000106397/ENSG00000070404/ENSG00000137868/ENSG00000119699/ENSG00000134323…	SPDEF/ESRP2/FOXA1/WNT7B/AGR2/CRISPLD2/SHH/EPAS1/ID1/ABCA12/PGR/ITGA3/ASCL1/SREBF1/SOX11/IGFBP5/GRHL2/LAMA5/PDGFA/EDN2/PLOD3/FSTL3/STRA6/TGFB3/MYCN/TNS3/TBX4/HS6ST1/PPP1CA/CELSR1/NOTCH1/CTSH/VEGFA/LIF/HES1/FGF18/DHCR7/DAG1/RAB3A/MAPK3/CIC	41
BP	GO:0032273	positive regulation of protein polymerization	31|2653	115|14725	0.011135	0.15063	ENSG00000006747/ENSG00000161905/ENSG00000090339/ENSG00000248905/ENSG00000102879/ENSG00000148180/ENSG00000125753/ENSG00000106526/ENSG00000126353/ENSG00000172725/ENSG00000130429/ENSG00000015285/ENSG00000111276/ENSG00000101336/ENSG00000146216/ENSG00000241553/ENSG00000204991/ENSG00000085733/ENSG00000137497/ENSG00000130787/ENSG00000006606/ENSG00000197879/ENSG00000127831/ENSG00000254999/ENSG00000136950…	SCIN/ALOX15/ICAM1/FMN1/CORO1A/GSN/VASP/ACTR3C/CCR7/CORO1B/ARPC1B/WAS/CDKN1B/HCK/TTBK1/ARPC4/SPIRE2/CTTN/NUMA1/HIP1R/CCL26/MYO1C/VIL1/BRK1/ARPC5L/GRB2/CYFIP1/PYCARD/FES/WASL/NPHS1	31
BP	GO:0045685	regulation of glial cell differentiation	18|2653	58|14725	0.0112228	0.151017	ENSG00000166145/ENSG00000164690/ENSG00000170075/ENSG00000175505/ENSG00000149256/ENSG00000105695/ENSG00000121966/ENSG00000130164/ENSG00000134323/ENSG00000137462/ENSG00000071127/ENSG00000146216/ENSG00000146072/ENSG00000148400/ENSG00000128342/ENSG00000114315/ENSG00000173402/ENSG00000140538	SPINT1/SHH/GPR37L1/CLCF1/TENM4/MAG/CXCR4/LDLR/MYCN/TLR2/WDR1/TTBK1/TNFRSF21/NOTCH1/LIF/HES1/DAG1/NTRK3	18
BP	GO:0048596	embryonic camera-type eye morphogenesis	10|2653	26|14725	0.0113612	0.151017	ENSG00000121068/ENSG00000101144/ENSG00000176887/ENSG00000163349/ENSG00000180176/ENSG00000184254/ENSG00000137868/ENSG00000137203/ENSG00000164442/ENSG00000163251	TBX2/BMP7/SOX11/HIPK1/TH/ALDH1A3/STRA6/TFAP2A/CITED2/FZD5	10
BP	GO:0048710	regulation of astrocyte differentiation	10|2653	26|14725	0.0113612	0.151017	ENSG00000170075/ENSG00000175505/ENSG00000105695/ENSG00000130164/ENSG00000134323/ENSG00000146216/ENSG00000148400/ENSG00000128342/ENSG00000114315/ENSG00000140538	GPR37L1/CLCF1/MAG/LDLR/MYCN/TTBK1/NOTCH1/LIF/HES1/NTRK3	10
BP	GO:0048730	epidermis morphogenesis	10|2653	26|14725	0.0113612	0.151017	ENSG00000164690/ENSG00000136826/ENSG00000092969/ENSG00000073282/ENSG00000115461/ENSG00000128422/ENSG00000106397/ENSG00000148400/ENSG00000163472/ENSG00000124216	SHH/KLF4/TGFB2/TP63/IGFBP5/KRT17/PLOD3/NOTCH1/TMEM79/SNAI1	10
BP	GO:0098901	regulation of cardiac muscle cell action potential	10|2653	26|14725	0.0113612	0.151017	ENSG00000173801/ENSG00000129682/ENSG00000130529/ENSG00000105974/ENSG00000196924/ENSG00000057294/ENSG00000198929/ENSG00000183230/ENSG00000096696/ENSG00000138622	JUP/FGF13/TRPM4/CAV1/FLNA/PKP2/NOS1AP/CTNNA3/DSP/HCN4	10
BP	GO:1902230	negative regulation of intrinsic apoptotic signaling pathway in response to DNA damage	10|2653	26|14725	0.0113612	0.151017	ENSG00000144476/ENSG00000026508/ENSG00000107562/ENSG00000161642/ENSG00000185499/ENSG00000120885/ENSG00000015475/ENSG00000171552/ENSG00000128886/ENSG00000124216	ACKR3/CD44/CXCL12/ZNF385A/MUC1/CLU/BID/BCL2L1/ELL3/SNAI1	10
BP	GO:0051896	regulation of protein kinase B signaling	45|2653	180|14725	0.0113798	0.151017	ENSG00000137801/ENSG00000091831/ENSG00000065361/ENSG00000107485/ENSG00000100311/ENSG00000180543/ENSG00000184731/ENSG00000178568/ENSG00000109062/ENSG00000151632/ENSG00000196139/ENSG00000169047/ENSG00000136826/ENSG00000174307/ENSG00000112902/ENSG00000164850/ENSG00000122679/ENSG00000115461/ENSG00000145675/ENSG00000164976/ENSG00000197461/ENSG00000153064/ENSG00000258839/ENSG00000126353/ENSG00000142208…	THBS1/ESR1/ERBB3/GATA3/PDGFB/TSPYL5/FAM110C/ERBB4/SLC9A3R1/AKR1C2/AKR1C3/IRS1/KLF4/PHLDA3/SEMA5A/GPER1/RAMP3/IGFBP5/PIK3R1/MYORG/PDGFA/BANK1/MC1R/CCR7/AKT1/TRIB3/RRAS/PTPRJ/CIB1/MST1R/EPHA2/F7/FGF22/DDIT3/PDCD6/KLB/PHLPP2/FGF18/EGF/ADAM8/GRB2/DAG1/NOP53/ERBB2/VAV1	45
BP	GO:0045137	development of primary sexual characteristics	49|2653	199|14725	0.011464	0.151017	ENSG00000091831/ENSG00000107485/ENSG00000205336/ENSG00000128564/ENSG00000163083/ENSG00000176046/ENSG00000176788/ENSG00000143552/ENSG00000090339/ENSG00000087510/ENSG00000176720/ENSG00000100290/ENSG00000106003/ENSG00000082175/ENSG00000196139/ENSG00000176399/ENSG00000092969/ENSG00000115884/ENSG00000260428/ENSG00000131759/ENSG00000110092/ENSG00000162552/ENSG00000188372/ENSG00000169083/ENSG00000121858…	ESR1/GATA3/ADGRG1/VGF/INHBB/NUPR1/BASP1/NUP210L/ICAM1/TFAP2C/BOK/BIK/LFNG/PGR/AKR1C3/DMRTA1/TGFB2/SDC1/SCX/RARA/CCND1/WNT4/ZP3/AR/TNFSF10/INHA/FSTL3/CEBPB/MMP19/ADAM15/IRX5/CITED2/ARID5B/BCL2L1/CSDE1/UMODL1/CTNNA1/VEGFA/CST3/NRIP1/RHOBTB3/ARRB1/COL9A3/INHBA/PATZ1/BRIP1/EIF2B5/CGA/REN	49
BP	GO:0033209	tumor necrosis factor-mediated signaling pathway	39|2653	152|14725	0.0114848	0.151017	ENSG00000170421/ENSG00000111057/ENSG00000095261/ENSG00000006327/ENSG00000111321/ENSG00000205542/ENSG00000104689/ENSG00000163636/ENSG00000100906/ENSG00000124635/ENSG00000215788/ENSG00000186891/ENSG00000163349/ENSG00000140939/ENSG00000131080/ENSG00000141527/ENSG00000205220/ENSG00000067182/ENSG00000023445/ENSG00000092098/ENSG00000064300/ENSG00000102871/ENSG00000092010/ENSG00000164761/ENSG00000110514…	KRT8/KRT18/PSMD5/TNFRSF12A/LTBR/TMSB4X/TNFRSF10A/PSMD6/NFKBIA/HIST1H2BJ/TNFRSF25/TNFRSF18/HIPK1/NOL3/EDA2R/CARD14/PSMB10/TNFRSF1A/BIRC3/RNF31/NGFR/TRADD/PSME1/TNFRSF11B/MADD/PSMA7/SPPL2A/TNFRSF21/PSMC5/MAP3K14/UBC/IKBKG/PSME2/TNFSF15/SHARPIN/PSMD4/PYCARD/CASP4/PSMB4	39
BP	GO:0002573	myeloid leukocyte differentiation	42|2653	166|14725	0.011488	0.151017	ENSG00000107485/ENSG00000129993/ENSG00000119714/ENSG00000171223/ENSG00000111321/ENSG00000100867/ENSG00000156127/ENSG00000159216/ENSG00000170345/ENSG00000131759/ENSG00000180694/ENSG00000197046/ENSG00000155090/ENSG00000179588/ENSG00000145675/ENSG00000182718/ENSG00000033327/ENSG00000104856/ENSG00000123999/ENSG00000070404/ENSG00000177706/ENSG00000126353/ENSG00000185650/ENSG00000243364/ENSG00000172216…	GATA3/CBFA2T3/GPR68/JUNB/LTBR/DHRS2/BATF/RUNX1/FOS/RARA/TMEM64/SIGLEC15/KLF10/ZFPM1/PIK3R1/ANXA2/GAB2/RELB/INHA/FSTL3/FAM20C/CCR7/ZFP36L1/EFNA4/CEBPB/IL20/MMP9/GNAS/MYH9/TLR2/EPHA2/CITED2/SBNO2/ESRRA/CTNNBIP1/VEGFA/ATP6AP1/LIF/ZBTB46/INHBA/FAM213A/MAFB	42
BP	GO:0001836	release of cytochrome c from mitochondria	17|2653	54|14725	0.0116353	0.151017	ENSG00000175793/ENSG00000176720/ENSG00000100290/ENSG00000104081/ENSG00000164850/ENSG00000160789/ENSG00000140939/ENSG00000126709/ENSG00000121858/ENSG00000120885/ENSG00000015475/ENSG00000142208/ENSG00000100985/ENSG00000105327/ENSG00000214253/ENSG00000171552/ENSG00000103490	SFN/BOK/BIK/BMF/GPER1/LMNA/NOL3/IFI6/TNFSF10/CLU/BID/AKT1/MMP9/BBC3/FIS1/BCL2L1/PYCARD	17
BP	GO:0042574	retinal metabolic process	6|2653	12|14725	0.0116455	0.151017	ENSG00000138061/ENSG00000196139/ENSG00000187134/ENSG00000184254/ENSG00000170786/ENSG00000135697	CYP1B1/AKR1C3/AKR1C1/ALDH1A3/SDR16C5/BCO1	6
BP	GO:0042635	positive regulation of hair cycle	6|2653	12|14725	0.0116455	0.151017	ENSG00000092969/ENSG00000128422/ENSG00000120149/ENSG00000102871/ENSG00000137497/ENSG00000109101	TGFB2/KRT17/MSX2/TRADD/NUMA1/FOXN1	6
BP	GO:0043217	myelin maintenance	6|2653	12|14725	0.0116455	0.151017	ENSG00000103089/ENSG00000169247/ENSG00000120885/ENSG00000121966/ENSG00000142208/ENSG00000105221	FA2H/SH3TC2/CLU/CXCR4/AKT1/AKT2	6
BP	GO:0060253	negative regulation of glial cell proliferation	6|2653	12|14725	0.0116455	0.151017	ENSG00000183734/ENSG00000176887/ENSG00000182054/ENSG00000143418/ENSG00000148400/ENSG00000114315	ASCL2/SOX11/IDH2/CERS2/NOTCH1/HES1	6
BP	GO:0060742	epithelial cell differentiation involved in prostate gland development	6|2653	12|14725	0.0116455	0.151017	ENSG00000129514/ENSG00000186350/ENSG00000073282/ENSG00000169083/ENSG00000148400/ENSG00000197746	FOXA1/RXRA/TP63/AR/NOTCH1/PSAP	6
BP	GO:1900029	positive regulation of ruffle assembly	6|2653	12|14725	0.0116455	0.151017	ENSG00000177106/ENSG00000131037/ENSG00000106078/ENSG00000140995/ENSG00000273749/ENSG00000174775	EPS8L2/EPS8L1/COBL/DEF8/CYFIP1/HRAS	6
BP	GO:1903729	regulation of plasma membrane organization	6|2653	12|14725	0.0116455	0.151017	ENSG00000163220/ENSG00000092969/ENSG00000148180/ENSG00000169083/ENSG00000163932/ENSG00000106299	S100A9/TGFB2/GSN/AR/PRKCD/WASL	6
BP	GO:1903522	regulation of blood circulation	60|2653	252|14725	0.0117423	0.151923	ENSG00000075461/ENSG00000089356/ENSG00000099337/ENSG00000124249/ENSG00000159167/ENSG00000074370/ENSG00000121068/ENSG00000116016/ENSG00000090339/ENSG00000168398/ENSG00000173801/ENSG00000162989/ENSG00000055118/ENSG00000078401/ENSG00000129682/ENSG00000196557/ENSG00000092969/ENSG00000130529/ENSG00000168539/ENSG00000184719/ENSG00000167535/ENSG00000072310/ENSG00000163874/ENSG00000090020/ENSG00000180176…	CACNG4/FXYD3/KCNK6/KCNK15/STC1/ATP2A3/TBX2/EPAS1/ICAM1/BDKRB2/JUP/KCNJ3/KCNH2/EDN1/FGF13/CACNA1H/TGFB2/TRPM4/CHRM1/RNLS/CACNB3/SREBF1/ZC3H12A/SLC9A1/TH/SMTN/SCN1B/EDN2/ATP1B1/CAV1/ITPR3/AKT1/KCNN2/TPM1/FLNA/ADRA2B/IRX5/KCNK1/KCNK3/PKP2/NOS1AP/KCND3/CTNNA3/P2RX4/DSP/ITPR1/DMPK/GRK2/ADRA2C/CACNG1/KCNJ11/GAA/CACNA1D/PER2/SMAD7/ECE1/DOCK5/HCN4/GCH1/CALM1	60
BP	GO:0001838	embryonic epithelial tube formation	32|2653	120|14725	0.0117967	0.152277	ENSG00000166145/ENSG00000149418/ENSG00000107485/ENSG00000167642/ENSG00000158055/ENSG00000101115/ENSG00000170561/ENSG00000165731/ENSG00000124145/ENSG00000092969/ENSG00000131759/ENSG00000125618/ENSG00000101144/ENSG00000196576/ENSG00000162552/ENSG00000176887/ENSG00000138771/ENSG00000168758/ENSG00000083307/ENSG00000172819/ENSG00000125753/ENSG00000074219/ENSG00000106078/ENSG00000110195/ENSG00000125850…	SPINT1/ST14/GATA3/SPINT2/GRHL3/SALL4/IRX2/RET/SDC4/TGFB2/RARA/PAX8/BMP7/PLXNB2/WNT4/SOX11/SHROOM3/SEMA4C/GRHL2/RARG/VASP/TEAD2/COBL/FOLR1/OVOL2/CITED2/CELSR1/ARHGAP35/CFL1/IRX3/IFT122/DVL3	32
BP	GO:0042476	odontogenesis	30|2653	111|14725	0.0119169	0.153353	ENSG00000132470/ENSG00000164690/ENSG00000064195/ENSG00000165272/ENSG00000124813/ENSG00000078401/ENSG00000092969/ENSG00000115884/ENSG00000101144/ENSG00000189120/ENSG00000073282/ENSG00000187689/ENSG00000130702/ENSG00000164920/ENSG00000143367/ENSG00000177706/ENSG00000067836/ENSG00000120149/ENSG00000119699/ENSG00000158158/ENSG00000137203/ENSG00000110400/ENSG00000184916/ENSG00000127152/ENSG00000141905…	ITGB4/SHH/DLX3/AQP3/RUNX2/EDN1/TGFB2/SDC1/BMP7/SP6/TP63/AMTN/LAMA5/OSR2/TUFT1/FAM20C/ROGDI/MSX2/TGFB3/CNNM4/TFAP2A/NECTIN1/JAG2/BCL11B/NFIC/TNFRSF11B/CTNNA1/MYO5A/INHBA/SERPINE1	30
BP	GO:0050708	regulation of protein secretion	80|2653	350|14725	0.0119344	0.153353	ENSG00000107485/ENSG00000163083/ENSG00000119714/ENSG00000115267/ENSG00000073350/ENSG00000205542/ENSG00000183044/ENSG00000011347/ENSG00000134830/ENSG00000197971/ENSG00000100219/ENSG00000185386/ENSG00000169047/ENSG00000087085/ENSG00000170745/ENSG00000173175/ENSG00000171522/ENSG00000092969/ENSG00000130529/ENSG00000104783/ENSG00000007384/ENSG00000164850/ENSG00000072310/ENSG00000182054/ENSG00000134258…	GATA3/INHBB/GPR68/IFIH1/LLGL2/TMSB4X/ABAT/SYT7/C5AR2/MBP/XBP1/MAPK11/IRS1/ACHE/KCNS3/ADCY5/PTGER4/TGFB2/TRPM4/KCNN4/RHBDF1/GPER1/SREBF1/IDH2/VTCN1/CPT1A/ZC3H12A/ICA1/SLC2A1/BANK1/ITPR3/CCR7/PPP3CA/FFAR2/GNAS/NR1H2/IL17RC/HCAR2/TGFB3/FN1/TLR2/NOV/HLA-DRB1/STX1A/SLC25A6/SNAP25/ANXA4/PFKL/SCAMP5/LRP5/MIDN/AACS/TNFRSF21/HK1/PIM3/ITPR1/RSAD2/RASGRP1/PHPT1/RHBDF2/NR1D1/TRPV4/ADRA2C/ARRB1/ERP29/ADAM8/IR…	80
BP	GO:0086005	ventricular cardiac muscle cell action potential	11|2653	30|14725	0.0120523	0.153456	ENSG00000173801/ENSG00000162989/ENSG00000055118/ENSG00000130529/ENSG00000105974/ENSG00000057294/ENSG00000198929/ENSG00000171385/ENSG00000183230/ENSG00000096696/ENSG00000049759	JUP/KCNJ3/KCNH2/TRPM4/CAV1/PKP2/NOS1AP/KCND3/CTNNA3/DSP/NEDD4L	11
BP	GO:0051056	regulation of small GTPase mediated signal transduction	70|2653	301|14725	0.0120769	0.153456	ENSG00000165140/ENSG00000205336/ENSG00000124126/ENSG00000177106/ENSG00000125637/ENSG00000168542/ENSG00000173156/ENSG00000127084/ENSG00000131037/ENSG00000130762/ENSG00000142632/ENSG00000112379/ENSG00000005884/ENSG00000008323/ENSG00000092969/ENSG00000099250/ENSG00000113916/ENSG00000089820/ENSG00000111344/ENSG00000182957/ENSG00000050327/ENSG00000104140/novel.697/ENSG00000076864/ENSG00000074964/ENSG0…	FBP1/ADGRG1/PREX1/EPS8L2/PSD4/COL3A1/RHOD/FGD3/EPS8L1/ARHGEF16/ARHGEF19/ARFGEF3/ITGA3/PLEKHG6/TGFB2/NRP1/BCL6/ARHGAP4/RASAL1/SPATA13/ARHGEF5/RHOV/-/RAP1GAP/ARHGEF10L/SRGAP1/RHOC/RHOB/ARHGEF37/RASA3/ABCA1/-/VAV2/PLEKHG5/ARHGEF28/ARHGEF17/CYTH2/MCF2L/ABR/ARHGAP1/MADD/ARHGAP39/ARHGAP35/NOTCH1/RHOF/SIPA1L3/ARHGAP8/RHOH/-/RASGRP1/ARHGAP36/-/ARRB1/RTN4R/DAB2IP/SQSTM1/IQSEC2/ARHGDIB/GMIP/HRAS/FGD4/VAV3/…	70
BP	GO:0061572	actin filament bundle organization	35|2653	134|14725	0.012166	0.153456	ENSG00000184292/ENSG00000111859/ENSG00000125968/ENSG00000173156/ENSG00000124145/ENSG00000171522/ENSG00000099250/ENSG00000136167/ENSG00000146904/ENSG00000171992/ENSG00000162552/ENSG00000050327/ENSG00000145675/ENSG00000090020/ENSG00000172403/ENSG00000187017/ENSG00000074964/ENSG00000172725/ENSG00000158856/ENSG00000140416/ENSG00000089159/ENSG00000186765/ENSG00000015285/ENSG00000119699/ENSG00000082781…	TACSTD2/NEDD9/ID1/RHOD/SDC4/PTGER4/NRP1/LCP1/EPHA1/SYNPO/WNT4/ARHGEF5/PIK3R1/SLC9A1/SYNPO2/ESPN/ARHGEF10L/CORO1B/DMTN/TPM1/PXN/FSCN2/WAS/TGFB3/ITGB5/SMAD3/SPIRE2/TESK1/ACTN1/VIL1/S100A10/MYO1B/ARRB1/LIMK1/ZYX	35
BP	GO:0097696	STAT cascade	35|2653	134|14725	0.012166	0.153456	ENSG00000069399/ENSG00000178078/ENSG00000184557/ENSG00000185924/ENSG00000138061/ENSG00000101213/ENSG00000138496/ENSG00000113494/ENSG00000173193/ENSG00000178568/ENSG00000165731/ENSG00000175505/ENSG00000185338/ENSG00000186891/ENSG00000126561/ENSG00000132000/ENSG00000172061/ENSG00000198739/ENSG00000105974/ENSG00000067182/ENSG00000114737/ENSG00000162891/ENSG00000123609/ENSG00000006016/ENSG00000108691…	BCL3/STAP2/SOCS3/RTN4RL1/CYP1B1/PTK6/PARP9/PRLR/PARP14/ERBB4/RET/CLCF1/SOCS1/TNFRSF18/STAT5A/PODNL1/LRRC15/LRRTM3/CAV1/TNFRSF1A/CISH/IL20/NMI/CRLF1/CCL2/IL24/AGAP2/IFNL1/NOTCH1/LIF/HES1/RTN4R/LRRC4/PTPN1/MAPK3	35
BP	GO:0048640	negative regulation of developmental growth	23|2653	80|14725	0.0122476	0.153456	ENSG00000001617/ENSG00000047644/ENSG00000160211/ENSG00000185386/ENSG00000129682/ENSG00000099250/ENSG00000113739/ENSG00000112902/ENSG00000082482/ENSG00000105695/ENSG00000089820/ENSG00000053108/ENSG00000083290/ENSG00000087460/ENSG00000164442/ENSG00000130827/ENSG00000108557/ENSG00000113645/ENSG00000127870/ENSG00000207547/ENSG00000040608/ENSG00000008083/ENSG00000135346	SEMA3F/WWC3/G6PD/MAPK11/FGF13/NRP1/STC2/SEMA5A/KCNK2/MAG/ARHGAP4/FSTL4/ULK2/GNAS/CITED2/PLXNA3/RAI1/WWC1/RNF6/MIR25/RTN4R/JARID2/CGA	23
BP	GO:1904019	epithelial cell apoptotic process	23|2653	80|14725	0.0122476	0.153456	ENSG00000170421/ENSG00000137801/ENSG00000107485/ENSG00000111057/ENSG00000167772/ENSG00000090339/ENSG00000176720/ENSG00000196139/ENSG00000112902/ENSG00000164850/ENSG00000148180/ENSG00000163349/ENSG00000182871/ENSG00000185650/ENSG00000015475/ENSG00000130669/ENSG00000184916/ENSG00000171552/ENSG00000109501/ENSG00000168884/ENSG00000136848/ENSG00000134243/ENSG00000106366	KRT8/THBS1/GATA3/KRT18/ANGPTL4/ICAM1/BOK/AKR1C3/SEMA5A/GPER1/GSN/HIPK1/COL18A1/ZFP36L1/BID/PAK4/JAG2/BCL2L1/WFS1/TNIP2/DAB2IP/SORT1/SERPINE1	23
BP	GO:0002694	regulation of leukocyte activation	89|2653	395|14725	0.0122521	0.153456	ENSG00000137801/ENSG00000107485/ENSG00000092929/ENSG00000076242/ENSG00000131981/ENSG00000118640/ENSG00000172936/ENSG00000111679/ENSG00000164690/ENSG00000100097/ENSG00000124762/ENSG00000101096/ENSG00000179388/ENSG00000100219/ENSG00000159216/ENSG00000124145/ENSG00000175505/ENSG00000131759/ENSG00000115457/ENSG00000170476/ENSG00000160685/ENSG00000164850/ENSG00000010704/ENSG00000188372/ENSG00000176887…	THBS1/GATA3/UNC13D/MLH1/LGALS3/VAMP8/MYD88/PTPN6/SHH/LGALS1/CDKN1A/NFATC2/EGR3/XBP1/RUNX1/SDC4/CLCF1/RARA/IGFBP2/MZB1/ZBTB7B/GPER1/HFE/ZP3/SOX11/BCL6/SOCS1/CORO1A/VTCN1/PGLYRP2/TNFRSF18/GSN/PIK3R1/ZC3H12A/DOCK8/ZFP36L2/HLA-DRB5/GAB2/BANK1/INHA/MAP3K8/CAV1/CCR7/ZFP36L1/ZMIZ1/AKT1/NECTIN2/CEBPB/ITGAM/CCL2/LDLR/MYB/TICAM1/SOX13/HLA-DRB1/TTBK1/SLC7A2/ABR/GPNMB/CD47/IFNL1/TNFRSF21/TNIP2/IRF1/RASGRP1/F…	89
BP	GO:0007422	peripheral nervous system development	20|2653	67|14725	0.0122744	0.153456	ENSG00000065361/ENSG00000163347/ENSG00000103089/ENSG00000179388/ENSG00000159216/ENSG00000146013/ENSG00000112414/ENSG00000169247/ENSG00000142208/ENSG00000117407/ENSG00000134202/ENSG00000109099/ENSG00000166886/ENSG00000164442/ENSG00000172037/ENSG00000221866/ENSG00000173402/ENSG00000105221/ENSG00000181790/ENSG00000141736	ERBB3/CLDN1/FA2H/EGR3/RUNX1/GFRA3/ADGRG6/SH3TC2/AKT1/ARTN/GSTM3/PMP22/NAB2/CITED2/LAMB2/PLXNA4/DAG1/AKT2/ADGRB1/ERBB2	20
BP	GO:0002294	CD4-positive, alpha-beta T cell differentiation involved in immune response	15|2653	46|14725	0.0122929	0.153456	ENSG00000107485/ENSG00000069399/ENSG00000156127/ENSG00000171522/ENSG00000131759/ENSG00000160685/ENSG00000113916/ENSG00000196189/ENSG00000179588/ENSG00000104856/ENSG00000143365/ENSG00000118513/ENSG00000197272/ENSG00000101665/ENSG00000104312	GATA3/BCL3/BATF/PTGER4/RARA/ZBTB7B/BCL6/SEMA4A/ZFPM1/RELB/RORC/MYB/IL27/SMAD7/RIPK2	15
BP	GO:0090257	regulation of muscle system process	48|2653	195|14725	0.0123098	0.153456	ENSG00000159167/ENSG00000183044/ENSG00000160211/ENSG00000173801/ENSG00000078401/ENSG00000168743/ENSG00000136826/ENSG00000129682/ENSG00000130529/ENSG00000168539/ENSG00000164850/ENSG00000115461/ENSG00000160789/ENSG00000163874/ENSG00000090020/ENSG00000140939/ENSG00000108443/ENSG00000183963/ENSG00000159173/ENSG00000127129/ENSG00000143153/ENSG00000058404/ENSG00000105974/ENSG00000138814/ENSG00000140416…	STC1/ABAT/G6PD/JUP/EDN1/NPNT/KLF4/FGF13/TRPM4/CHRM1/GPER1/IGFBP5/LMNA/ZC3H12A/SLC9A1/NOL3/RPS6KB1/SMTN/TNNI1/EDN2/ATP1B1/CAMK2B/CAV1/PPP3CA/TPM1/FLNA/ADRA2B/SMAD3/PKP2/NOS1AP/CTTN/TNNI2/CTNNA3/P2RX4/DSP/FBXO32/LMCD1/DMPK/MIR25/GRK2/ADRA2C/C12orf57/DAG1/SMAD7/JARID2/DOCK5/HCN4/CALM1	48
BP	GO:0033628	regulation of cell adhesion mediated by integrin	12|2653	34|14725	0.0124217	0.153456	ENSG00000111679/ENSG00000138061/ENSG00000169242/ENSG00000165731/ENSG00000092969/ENSG00000103335/ENSG00000177076/ENSG00000185499/ENSG00000128567/ENSG00000185043/ENSG00000142627/ENSG00000106366	PTPN6/CYP1B1/EFNA1/RET/TGFB2/PIEZO1/ACER2/MUC1/PODXL/CIB1/EPHA2/SERPINE1	12
BP	GO:0050919	negative chemotaxis	12|2653	34|14725	0.0124217	0.153456	ENSG00000001617/ENSG00000075223/ENSG00000112902/ENSG00000185737/ENSG00000196189/ENSG00000168758/ENSG00000012171/ENSG00000197461/ENSG00000187122/ENSG00000130827/ENSG00000082684/ENSG00000221866	SEMA3F/SEMA3C/SEMA5A/NRG3/SEMA4A/SEMA4C/SEMA3B/PDGFA/SLIT1/PLXNA3/SEMA5B/PLXNA4	12
BP	GO:0086091	regulation of heart rate by cardiac conduction	12|2653	34|14725	0.0124217	0.153456	ENSG00000173801/ENSG00000162989/ENSG00000055118/ENSG00000130529/ENSG00000105711/ENSG00000105974/ENSG00000057294/ENSG00000171385/ENSG00000183230/ENSG00000096696/ENSG00000157388/ENSG00000138622	JUP/KCNJ3/KCNH2/TRPM4/SCN1B/CAV1/PKP2/KCND3/CTNNA3/DSP/CACNA1D/HCN4	12
BP	GO:0008584	male gonad development	33|2653	125|14725	0.012437	0.153456	ENSG00000091831/ENSG00000107485/ENSG00000205336/ENSG00000176046/ENSG00000143552/ENSG00000090339/ENSG00000087510/ENSG00000176720/ENSG00000100290/ENSG00000196139/ENSG00000092969/ENSG00000115884/ENSG00000260428/ENSG00000131759/ENSG00000110092/ENSG00000162552/ENSG00000169083/ENSG00000121858/ENSG00000123999/ENSG00000070404/ENSG00000143537/ENSG00000164442/ENSG00000150347/ENSG00000171552/ENSG00000009307…	ESR1/GATA3/ADGRG1/NUPR1/NUP210L/ICAM1/TFAP2C/BOK/BIK/AKR1C3/TGFB2/SDC1/SCX/RARA/CCND1/WNT4/AR/TNFSF10/INHA/FSTL3/ADAM15/CITED2/ARID5B/BCL2L1/CSDE1/CTNNA1/CST3/RHOBTB3/COL9A3/INHBA/PATZ1/BRIP1/REN	33
BP	GO:0045637	regulation of myeloid cell differentiation	53|2653	219|14725	0.0124684	0.153456	ENSG00000137801/ENSG00000178467/ENSG00000006747/ENSG00000131981/ENSG00000119714/ENSG00000278828/ENSG00000187608/ENSG00000158406/ENSG00000128016/ENSG00000273983/ENSG00000159216/ENSG00000170345/ENSG00000100906/ENSG00000131759/ENSG00000180694/ENSG00000197046/ENSG00000155090/ENSG00000179588/ENSG00000145675/ENSG00000197837/ENSG00000172819/ENSG00000123999/ENSG00000070404/ENSG00000185650/ENSG00000172216…	THBS1/P4HTM/SCIN/LGALS3/GPR68/HIST1H3H/ISG15/HIST1H4H/ZFP36/HIST1H3G/RUNX1/FOS/NFKBIA/RARA/TMEM64/SIGLEC15/KLF10/ZFPM1/PIK3R1/HIST4H4/RARG/INHA/FSTL3/ZFP36L1/CEBPB/IL20/PRMT6/HIST1H3B/GNAS/HIST2H3D/CIB1/JAG1/HIST1H4K/LEO1/HIST2H4B/H3F3B/HIST1H3A/ESRRA/CTNNBIP1/ATP6AP1/LIF/HIST1H3E/ZBTB46/EIF6/HIST1H4I/INHBA/FAM213A/MAFB/ZNF16/HIST2H4A/FES/HIST1H3J/PRMT1	53
BP	GO:0061448	connective tissue development	53|2653	219|14725	0.0124684	0.153456	ENSG00000129514/ENSG00000188064/ENSG00000100311/ENSG00000006747/ENSG00000120708/ENSG00000159167/ENSG00000026508/ENSG00000124813/ENSG00000196562/ENSG00000078401/ENSG00000100219/ENSG00000115380/ENSG00000159216/ENSG00000130529/ENSG00000260428/ENSG00000131759/ENSG00000101144/ENSG00000172819/ENSG00000164920/ENSG00000120738/ENSG00000104447/ENSG00000143365/ENSG00000176485/ENSG00000165804/ENSG00000213145…	FOXA1/WNT7B/PDGFB/SCIN/TGFBI/STC1/CD44/RUNX2/SULF2/EDN1/XBP1/EFEMP1/RUNX1/TRPM4/SCX/RARA/BMP7/RARG/OSR2/EGR1/TRPS1/RORC/PLA2G16/ZNF219/CRIP1/SNX19/MGP/MSX2/GNAS/FBXW4/MYCN/SLC25A25/NOV/SMAD3/CHADL/POR/ARID5B/LRP5/AACS/ESRRA/MMP13/NOTCH1/UMODL1/WNT9A/LOXL2/SERPINH1/TRPV4/FGF18/GLG1/SNAI1/CSGALNACT1/MAPK3/THBS3	53
BP	GO:0014003	oligodendrocyte development	13|2653	38|14725	0.0125464	0.153456	ENSG00000164690/ENSG00000103089/ENSG00000010278/ENSG00000149256/ENSG00000139352/ENSG00000176887/ENSG00000105695/ENSG00000148180/ENSG00000120885/ENSG00000137462/ENSG00000163517/ENSG00000100429/ENSG00000145191	SHH/FA2H/CD9/TENM4/ASCL1/SOX11/MAG/GSN/CLU/TLR2/HDAC11/HDAC10/EIF2B5	13
BP	GO:0048483	autonomic nervous system development	13|2653	38|14725	0.0125464	0.153456	ENSG00000107485/ENSG00000001617/ENSG00000165731/ENSG00000099250/ENSG00000146013/ENSG00000139352/ENSG00000176887/ENSG00000073282/ENSG00000137203/ENSG00000130827/ENSG00000221866/ENSG00000114315/ENSG00000197381	GATA3/SEMA3F/RET/NRP1/GFRA3/ASCL1/SOX11/TP63/TFAP2A/PLXNA3/PLXNA4/HES1/ADARB1	13
BP	GO:0035455	response to interferon-alpha	8|2653	19|14725	0.0125923	0.153456	ENSG00000107485/ENSG00000142089/ENSG00000130303/ENSG00000119922/ENSG00000185201/ENSG00000185885/ENSG00000119917/ENSG00000183486	GATA3/IFITM3/BST2/IFIT2/IFITM2/IFITM1/IFIT3/MX2	8
BP	GO:0036344	platelet morphogenesis	8|2653	19|14725	0.0125923	0.153456	ENSG00000111679/ENSG00000161642/ENSG00000179588/ENSG00000160796/ENSG00000100345/ENSG00000185043/ENSG00000071127/ENSG00000072110	PTPN6/ZNF385A/ZFPM1/NBEAL2/MYH9/CIB1/WDR1/ACTN1	8
BP	GO:0042537	benzene-containing compound metabolic process	8|2653	19|14725	0.0125923	0.153456	ENSG00000115919/ENSG00000168765/ENSG00000142973/ENSG00000134184/ENSG00000180176/ENSG00000241635/ENSG00000134202/ENSG00000117009	KYNU/GSTM4/CYP4B1/GSTM1/TH/UGT1A1/GSTM3/KMO	8
BP	GO:0048485	sympathetic nervous system development	8|2653	19|14725	0.0125923	0.153456	ENSG00000107485/ENSG00000001617/ENSG00000099250/ENSG00000146013/ENSG00000139352/ENSG00000176887/ENSG00000073282/ENSG00000221866	GATA3/SEMA3F/NRP1/GFRA3/ASCL1/SOX11/TP63/PLXNA4	8
BP	GO:0051797	regulation of hair follicle development	8|2653	19|14725	0.0125923	0.153456	ENSG00000062038/ENSG00000092969/ENSG00000128422/ENSG00000120149/ENSG00000102871/ENSG00000137497/ENSG00000109101/ENSG00000122641	CDH3/TGFB2/KRT17/MSX2/TRADD/NUMA1/FOXN1/INHBA	8
BP	GO:0060560	developmental growth involved in morphogenesis	49|2653	200|14725	0.0125953	0.153456	ENSG00000091831/ENSG00000198910/ENSG00000188064/ENSG00000143320/ENSG00000006327/ENSG00000164690/ENSG00000198753/ENSG00000121068/ENSG00000107562/ENSG00000001617/ENSG00000171587/ENSG00000164050/ENSG00000248905/ENSG00000129682/ENSG00000099250/ENSG00000112902/ENSG00000105695/ENSG00000043143/ENSG00000089820/ENSG00000091129/ENSG00000111344/ENSG00000053108/ENSG00000130558/ENSG00000172819/ENSG00000083290…	ESR1/L1CAM/WNT7B/CRABP2/TNFRSF12A/SHH/PLXNB3/TBX2/CXCL12/SEMA3F/DSCAM/PLXNB1/FMN1/FGF13/NRP1/SEMA5A/MAG/JADE2/ARHGAP4/NRCAM/RASAL1/FSTL4/OLFM1/RARG/ULK2/EPB41L5/SLIT1/COBL/AREG/FN1/PLXNA3/LAMB2/CTTN/ULK1/SEMA5B/MESP1/NOTCH1/PLXNA4/RNF6/VEGFA/RTN4R/LIMK1/CYFIP1/NEDD4L/KDM5B/CDKL5/SMURF1/DDR1/NTRK3	49
BP	GO:0017015	regulation of transforming growth factor beta receptor signaling pathway	27|2653	98|14725	0.0127479	0.1547	ENSG00000137801/ENSG00000095739/ENSG00000124225/ENSG00000186174/ENSG00000242265/ENSG00000005884/ENSG00000168743/ENSG00000176887/ENSG00000171236/ENSG00000105974/ENSG00000119699/ENSG00000110195/ENSG00000168675/ENSG00000166949/ENSG00000164442/ENSG00000168140/ENSG00000123159/ENSG00000127578/ENSG00000147883/ENSG00000150991/ENSG00000197323/ENSG00000137834/ENSG00000090863/ENSG00000101665/ENSG00000169856…	THBS1/BAMBI/PMEPA1/BCL9L/PEG10/ITGA3/NPNT/SOX11/LRG1/CAV1/TGFB3/FOLR1/LDLRAD4/SMAD3/CITED2/VASN/GIPC1/WFIKKN1/CDKN2B/UBC/TRIM33/SMAD6/GLG1/SMAD7/ONECUT1/CAV2/SMURF1	27
BP	GO:0060218	hematopoietic stem cell differentiation	29|2653	107|14725	0.0127523	0.1547	ENSG00000107485/ENSG00000095261/ENSG00000278828/ENSG00000158406/ENSG00000156127/ENSG00000273983/ENSG00000159216/ENSG00000163636/ENSG00000197837/ENSG00000205220/ENSG00000274267/ENSG00000118513/ENSG00000183598/ENSG00000273542/ENSG00000270276/ENSG00000132475/ENSG00000092010/ENSG00000275714/ENSG00000101182/ENSG00000087191/ENSG00000274750/ENSG00000150991/ENSG00000100911/ENSG00000276180/ENSG00000159352…	GATA3/PSMD5/HIST1H3H/HIST1H4H/BATF/HIST1H3G/RUNX1/PSMD6/HIST4H4/PSMB10/HIST1H3B/MYB/HIST2H3D/HIST1H4K/HIST2H4B/H3F3B/PSME1/HIST1H3A/PSMA7/PSMC5/HIST1H3E/UBC/PSME2/HIST1H4I/PSMD4/TCF3/HIST2H4A/PSMB4/HIST1H3J	29
BP	GO:0070482	response to oxygen levels	81|2653	356|14725	0.012842	0.155455	ENSG00000137801/ENSG00000165215/ENSG00000129993/ENSG00000095261/ENSG00000159167/ENSG00000116016/ENSG00000107562/ENSG00000167772/ENSG00000198125/ENSG00000090339/ENSG00000165272/ENSG00000183044/ENSG00000124762/ENSG00000183734/ENSG00000078401/ENSG00000163636/ENSG00000092969/ENSG00000113739/ENSG00000101144/ENSG00000082482/ENSG00000051523/ENSG00000187848/ENSG00000160789/ENSG00000090020/ENSG00000140465…	THBS1/CLDN3/CBFA2T3/PSMD5/STC1/EPAS1/CXCL12/ANGPTL4/MB/ICAM1/AQP3/ABAT/CDKN1A/ASCL2/EDN1/PSMD6/TGFB2/STC2/BMP7/KCNK2/CYBA/P2RX2/LMNA/SLC9A1/CYP1A1/NOL3/TH/EGLN3/EGR1/NR4A2/PSMB10/ATP1B1/HILPDA/CXCR4/CAV1/ZFP36L1/AKT1/BBC3/MYB/TGFB3/DDIT4/FIS1/TLR2/CDKN1B/F7/SMAD3/HSD11B2/CITED2/VASN/KCNK3/PSME1/ALAD/CA9/SOD3/ATP6V0D1/PSMA7/NOTCH1/ITPR1/PSMC5/LOXL2/VEGFA/ATP6AP1/CST3/TRPC6/UBC/PSME2/ADAM8/TMBIM6/E…	81
BP	GO:0014031	mesenchymal cell development	19|2653	63|14725	0.0128888	0.155687	ENSG00000164690/ENSG00000001617/ENSG00000178568/ENSG00000165731/ENSG00000078401/ENSG00000075223/ENSG00000099250/ENSG00000101144/ENSG00000176887/ENSG00000130702/ENSG00000110195/ENSG00000101384/ENSG00000125850/ENSG00000164442/ENSG00000148400/ENSG00000249915/ENSG00000172757/ENSG00000114315/ENSG00000102882	SHH/SEMA3F/ERBB4/RET/EDN1/SEMA3C/NRP1/BMP7/SOX11/LAMA5/FOLR1/JAG1/OVOL2/CITED2/NOTCH1/PDCD6/CFL1/HES1/MAPK3	19
BP	GO:1903532	positive regulation of secretion by cell	71|2653	307|14725	0.0131126	0.157915	ENSG00000107485/ENSG00000092929/ENSG00000163083/ENSG00000118640/ENSG00000119714/ENSG00000115267/ENSG00000107562/ENSG00000183044/ENSG00000011347/ENSG00000197971/ENSG00000078401/ENSG00000100219/ENSG00000185386/ENSG00000041353/ENSG00000087085/ENSG00000270885/ENSG00000145103/ENSG00000124145/ENSG00000101188/ENSG00000171522/ENSG00000196557/ENSG00000092969/ENSG00000130529/ENSG00000115884/ENSG00000104783…	GATA3/UNC13D/INHBB/VAMP8/GPR68/IFIH1/CXCL12/ABAT/SYT7/MBP/EDN1/XBP1/MAPK11/RAB27B/ACHE/RASL10B/ILDR1/SDC4/NTSR1/PTGER4/CACNA1H/TGFB2/TRPM4/SDC1/KCNN4/SYT10/GPER1/HFE/ZP3/SOX11/VTCN1/GAB2/INHA/RAB3D/FFAR2/ITGAM/CACNA1I/KISS1/TFR2/RAB15/NR1H2/IL17RC/MYB/HCAR2/TGFB3/TLR2/HLA-DRB1/STX1A/SMPD3/SCAMP5/AACS/STX1B/HK1/RASGRP1/PHPT1/ATP6AP1/TRPV4/GRK2/ARRB1/ADAM8/IRF3/LAMP1/INHBA/MYRIP/RAB3A/PYCARD/MAPK3/…	71
BP	GO:0030278	regulation of ossification	43|2653	172|14725	0.0131293	0.157915	ENSG00000188064/ENSG00000107984/ENSG00000170468/ENSG00000187608/ENSG00000124813/ENSG00000125968/ENSG00000168743/ENSG00000171522/ENSG00000131650/ENSG00000092969/ENSG00000130529/ENSG00000141232/ENSG00000180694/ENSG00000101144/ENSG00000162552/ENSG00000176887/ENSG00000073282/ENSG00000115461/ENSG00000164920/ENSG00000130522/ENSG00000177706/ENSG00000172216/ENSG00000109321/ENSG00000111341/ENSG00000120149…	WNT7B/DKK1/RIOX1/ISG15/RUNX2/ID1/NPNT/PTGER4/KREMEN2/TGFB2/TRPM4/TOB1/TMEM64/BMP7/WNT4/SOX11/TP63/IGFBP5/OSR2/JUND/FAM20C/CEBPB/AREG/MGP/MSX2/GNAS/TGFB3/TFAP2A/IFITM1/JAG1/SMAD3/CHRD/LRP5/ESRRA/NOTCH1/CTNNBIP1/ATP6AP1/ZHX3/SMAD6/PDLIM7/HDAC7/MAPK3/SMURF1	43
BP	GO:0010951	negative regulation of endopeptidase activity	47|2653	191|14725	0.0132196	0.158664	ENSG00000137801/ENSG00000079257/ENSG00000166145/ENSG00000175793/ENSG00000167642/ENSG00000026508/ENSG00000104689/ENSG00000130303/ENSG00000136826/ENSG00000011201/ENSG00000125730/ENSG00000160111/ENSG00000121552/ENSG00000140939/ENSG00000126709/ENSG00000003436/ENSG00000175315/ENSG00000142208/ENSG00000181788/ENSG00000134248/ENSG00000100985/ENSG00000170542/ENSG00000166401/ENSG00000166535/ENSG00000023445…	THBS1/LXN/SPINT1/SFN/SPINT2/CD44/TNFRSF10A/BST2/KLF4/ANOS1/C3/CPAMD8/CSTA/NOL3/IFI6/TFPI/CST6/AKT1/SIAH2/LAMTOR5/MMP9/SERPINB9/SERPINB8/A2ML1/BIRC3/AMBP/NGFR/SERPINA5/POR/RENBP/SERPINB5/WFIKKN1/FURIN/WNT9A/SERPINA3/SERPING1/VEGFA/VIL1/CST3/SERPINH1/ARRB1/WFDC2/SPINK4/MICAL1/CSTB/SERPINB1/SERPINE1	47
BP	GO:0014032	neural crest cell development	18|2653	59|14725	0.0134954	0.16163	ENSG00000164690/ENSG00000001617/ENSG00000178568/ENSG00000165731/ENSG00000078401/ENSG00000075223/ENSG00000099250/ENSG00000101144/ENSG00000176887/ENSG00000130702/ENSG00000110195/ENSG00000101384/ENSG00000125850/ENSG00000164442/ENSG00000249915/ENSG00000172757/ENSG00000114315/ENSG00000102882	SHH/SEMA3F/ERBB4/RET/EDN1/SEMA3C/NRP1/BMP7/SOX11/LAMA5/FOLR1/JAG1/OVOL2/CITED2/PDCD6/CFL1/HES1/MAPK3	18
BP	GO:0002685	regulation of leukocyte migration	35|2653	135|14725	0.0136512	0.162804	ENSG00000137801/ENSG00000189334/ENSG00000131981/ENSG00000172936/ENSG00000189058/ENSG00000107562/ENSG00000090339/ENSG00000115594/ENSG00000134830/ENSG00000078401/ENSG00000171522/ENSG00000188372/ENSG00000186891/ENSG00000107099/ENSG00000127129/ENSG00000117115/ENSG00000126353/ENSG00000169429/ENSG00000108691/ENSG00000151882/ENSG00000136999/ENSG00000057593/ENSG00000159842/ENSG00000106538/ENSG00000115009…	THBS1/S100A14/LGALS3/MYD88/APOD/CXCL12/ICAM1/IL1R1/C5AR2/EDN1/PTGER4/ZP3/TNFRSF18/DOCK8/EDN2/PADI2/CCR7/CXCL8/CCL2/CCL28/NOV/F7/ABR/RARRES2/CCL20/VEGFA/DAPK2/TRPV4/ADAM8/PYCARD/MAPK3/SERPINE1/BDKRB1/WASL/VEGFC	35
BP	GO:0097529	myeloid leukocyte migration	35|2653	135|14725	0.0136512	0.162804	ENSG00000137801/ENSG00000124126/ENSG00000189334/ENSG00000100311/ENSG00000131981/ENSG00000172936/ENSG00000107562/ENSG00000163220/ENSG00000115594/ENSG00000134830/ENSG00000078401/ENSG00000171522/ENSG00000092969/ENSG00000050327/ENSG00000143546/ENSG00000127129/ENSG00000126353/ENSG00000169429/ENSG00000108691/ENSG00000163702/ENSG00000102962/ENSG00000071127/ENSG00000136999/ENSG00000106538/ENSG00000115009…	THBS1/PREX1/S100A14/PDGFB/LGALS3/MYD88/CXCL12/S100A9/IL1R1/C5AR2/EDN1/PTGER4/TGFB2/ARHGEF5/S100A8/EDN2/CCR7/CXCL8/CCL2/IL17RC/CCL22/WDR1/NOV/RARRES2/CCL20/CCL26/VEGFA/DAPK2/TRPV4/ADAM8/VAV3/MAPK3/SERPINE1/VAV1/VEGFC	35
BP	GO:1990266	neutrophil migration	21|2653	72|14725	0.0137379	0.163492	ENSG00000124126/ENSG00000131981/ENSG00000172936/ENSG00000163220/ENSG00000115594/ENSG00000134830/ENSG00000078401/ENSG00000092969/ENSG00000143546/ENSG00000127129/ENSG00000126353/ENSG00000169429/ENSG00000108691/ENSG00000102962/ENSG00000071127/ENSG00000115009/ENSG00000006606/ENSG00000035664/ENSG00000151651/ENSG00000134215/ENSG00000141968	PREX1/LGALS3/MYD88/S100A9/IL1R1/C5AR2/EDN1/TGFB2/S100A8/EDN2/CCR7/CXCL8/CCL2/CCL22/WDR1/CCL20/CCL26/DAPK2/ADAM8/VAV3/VAV1	21
BP	GO:0046546	development of primary male sexual characteristics	33|2653	126|14725	0.0140111	0.166393	ENSG00000091831/ENSG00000107485/ENSG00000205336/ENSG00000176046/ENSG00000143552/ENSG00000090339/ENSG00000087510/ENSG00000176720/ENSG00000100290/ENSG00000196139/ENSG00000092969/ENSG00000115884/ENSG00000260428/ENSG00000131759/ENSG00000110092/ENSG00000162552/ENSG00000169083/ENSG00000121858/ENSG00000123999/ENSG00000070404/ENSG00000143537/ENSG00000164442/ENSG00000150347/ENSG00000171552/ENSG00000009307…	ESR1/GATA3/ADGRG1/NUPR1/NUP210L/ICAM1/TFAP2C/BOK/BIK/AKR1C3/TGFB2/SDC1/SCX/RARA/CCND1/WNT4/AR/TNFSF10/INHA/FSTL3/ADAM15/CITED2/ARID5B/BCL2L1/CSDE1/CTNNA1/CST3/RHOBTB3/COL9A3/INHBA/PATZ1/BRIP1/REN	33
BP	GO:0050926	regulation of positive chemotaxis	9|2653	23|14725	0.0142033	0.167267	ENSG00000107562/ENSG00000140945/ENSG00000117407/ENSG00000169429/ENSG00000057593/ENSG00000166949/ENSG00000112715/ENSG00000150630/ENSG00000140538	CXCL12/CDH13/ARTN/CXCL8/F7/SMAD3/VEGFA/VEGFC/NTRK3	9
BP	GO:0060561	apoptotic process involved in morphogenesis	9|2653	23|14725	0.0142033	0.167267	ENSG00000092969/ENSG00000125618/ENSG00000101144/ENSG00000086062/ENSG00000111424/ENSG00000184916/ENSG00000162337/ENSG00000148400/ENSG00000163251	TGFB2/PAX8/BMP7/B4GALT1/VDR/JAG2/LRP5/NOTCH1/FZD5	9
BP	GO:1903319	positive regulation of protein maturation	9|2653	23|14725	0.0142033	0.167267	ENSG00000125730/ENSG00000188886/ENSG00000148180/ENSG00000130173/ENSG00000105707/ENSG00000106327/ENSG00000100345/ENSG00000131187/ENSG00000151651	C3/ASTL/GSN/ANGPTL8/HPN/TFR2/MYH9/F12/ADAM8	9
BP	GO:1903792	negative regulation of anion transport	9|2653	23|14725	0.0142033	0.167267	ENSG00000137801/ENSG00000185101/ENSG00000183044/ENSG00000153246/ENSG00000170379/ENSG00000142208/ENSG00000101180/ENSG00000164129/ENSG00000105221	THBS1/ANO9/ABAT/PLA2R1/TCAF2/AKT1/HRH3/NPY5R/AKT2	9
BP	GO:0008016	regulation of heart contraction	51|2653	211|14725	0.0143627	0.168792	ENSG00000075461/ENSG00000089356/ENSG00000099337/ENSG00000124249/ENSG00000159167/ENSG00000074370/ENSG00000121068/ENSG00000116016/ENSG00000173801/ENSG00000162989/ENSG00000055118/ENSG00000078401/ENSG00000129682/ENSG00000196557/ENSG00000092969/ENSG00000130529/ENSG00000184719/ENSG00000167535/ENSG00000072310/ENSG00000163874/ENSG00000090020/ENSG00000180176/ENSG00000183963/ENSG00000105711/ENSG00000127129…	CACNG4/FXYD3/KCNK6/KCNK15/STC1/ATP2A3/TBX2/EPAS1/JUP/KCNJ3/KCNH2/EDN1/FGF13/CACNA1H/TGFB2/TRPM4/RNLS/CACNB3/SREBF1/ZC3H12A/SLC9A1/TH/SMTN/SCN1B/EDN2/ATP1B1/CAV1/ITPR3/KCNN2/TPM1/FLNA/IRX5/KCNK1/KCNK3/PKP2/NOS1AP/KCND3/CTNNA3/P2RX4/DSP/ITPR1/DMPK/GRK2/CACNG1/KCNJ11/GAA/CACNA1D/SMAD7/HCN4/GCH1/CALM1	51
BP	GO:0003015	heart process	57|2653	240|14725	0.0144702	0.16935	ENSG00000075461/ENSG00000089356/ENSG00000099337/ENSG00000124249/ENSG00000102683/ENSG00000159167/ENSG00000074370/ENSG00000121068/ENSG00000116016/ENSG00000173801/ENSG00000162989/ENSG00000055118/ENSG00000078401/ENSG00000196557/ENSG00000092969/ENSG00000130529/ENSG00000184719/ENSG00000167535/ENSG00000072310/ENSG00000122679/ENSG00000163874/ENSG00000090020/ENSG00000180176/ENSG00000104881/ENSG00000183963…	CACNG4/FXYD3/KCNK6/KCNK15/SGCG/STC1/ATP2A3/TBX2/EPAS1/JUP/KCNJ3/KCNH2/EDN1/CACNA1H/TGFB2/TRPM4/RNLS/CACNB3/SREBF1/RAMP3/ZC3H12A/SLC9A1/TH/PPP1R13L/SMTN/SCN1B/TNNI1/EDN2/ATP1B1/CAV1/ITPR3/KCNN2/TPM1/FLNA/IRX5/KCNK1/KCNK3/PKP2/NOS1AP/TNNI2/KCND3/CTNNA3/P2RX4/DSP/ITPR1/DMPK/GRK2/CACNG1/KCNJ11/GAA/CACNA1D/NEDD4L/FGF12/SMAD7/HCN4/GCH1/CALM1	57
BP	GO:0042063	gliogenesis	57|2653	240|14725	0.0144702	0.16935	ENSG00000065361/ENSG00000166145/ENSG00000205336/ENSG00000164690/ENSG00000103089/ENSG00000163220/ENSG00000176720/ENSG00000010278/ENSG00000170075/ENSG00000132561/ENSG00000103260/ENSG00000183734/ENSG00000184845/ENSG00000175505/ENSG00000092969/ENSG00000149256/ENSG00000139352/ENSG00000176887/ENSG00000105695/ENSG00000182054/ENSG00000148180/ENSG00000112414/ENSG00000169247/ENSG00000143418/ENSG00000143546…	ERBB3/SPINT1/ADGRG1/SHH/FA2H/S100A9/BOK/CD9/GPR37L1/MATN2/METRN/ASCL2/DRD1/CLCF1/TGFB2/TENM4/ASCL1/SOX11/MAG/IDH2/GSN/ADGRG6/SH3TC2/CERS2/S100A8/CLU/CXCR4/AKT1/DNER/ETV5/AREG/CCL2/LDLR/MYB/MYCN/TLR2/C16orf45/WDR1/NAB2/VIM/TTBK1/GPR157/LAMB2/PRKCH/TNFRSF21/NOTCH1/HDAC11/LIF/HES1/HDAC10/DAB2IP/DAG1/AKT2/MAPK3/EIF2B5/ERBB2/NTRK3	57
BP	GO:0002292	T cell differentiation involved in immune response	16|2653	51|14725	0.0146303	0.170845	ENSG00000107485/ENSG00000069399/ENSG00000156127/ENSG00000171522/ENSG00000131759/ENSG00000160685/ENSG00000113916/ENSG00000196189/ENSG00000179588/ENSG00000104856/ENSG00000143365/ENSG00000118513/ENSG00000182393/ENSG00000197272/ENSG00000101665/ENSG00000104312	GATA3/BCL3/BATF/PTGER4/RARA/ZBTB7B/BCL6/SEMA4A/ZFPM1/RELB/RORC/MYB/IFNL1/IL27/SMAD7/RIPK2	16
BP	GO:0010770	positive regulation of cell morphogenesis involved in differentiation	34|2653	131|14725	0.0146585	0.170845	ENSG00000198910/ENSG00000124126/ENSG00000092929/ENSG00000143320/ENSG00000006327/ENSG00000198753/ENSG00000107562/ENSG00000103260/ENSG00000171587/ENSG00000164050/ENSG00000099250/ENSG00000112902/ENSG00000196576/ENSG00000004399/ENSG00000058404/ENSG00000158856/ENSG00000196924/ENSG00000115414/ENSG00000257923/ENSG00000185043/ENSG00000064300/ENSG00000137825/ENSG00000184402/ENSG00000044090/ENSG00000112715…	L1CAM/PREX1/UNC13D/CRABP2/TNFRSF12A/PLXNB3/CXCL12/METRN/DSCAM/PLXNB1/NRP1/SEMA5A/PLXNB2/PLXND1/CAMK2B/DMTN/FLNA/FN1/CUX1/CIB1/NGFR/ITPKA/SS18L1/CUL7/VEGFA/S100A10/AMIGO1/LIMK1/CYFIP1/MYADM/DOCK5/CDKL5/OBSL1/NTRK3	34
BP	GO:0002221	pattern recognition receptor signaling pathway	40|2653	159|14725	0.0147086	0.171045	ENSG00000091831/ENSG00000189334/ENSG00000172936/ENSG00000115267/ENSG00000263528/ENSG00000163220/ENSG00000100906/ENSG00000125999/ENSG00000051523/ENSG00000161031/ENSG00000172243/ENSG00000255690/ENSG00000132256/ENSG00000143546/ENSG00000105974/ENSG00000126262/ENSG00000169896/ENSG00000162889/ENSG00000137462/ENSG00000023445/ENSG00000127666/ENSG00000131378/ENSG00000137161/ENSG00000110057/ENSG00000168884…	ESR1/S100A14/MYD88/IFIH1/IKBKE/S100A9/NFKBIA/BPIFB1/CYBA/PGLYRP2/CLEC7A/TRIL/TRIM5/S100A8/CAV1/FFAR2/ITGAM/MAPKAPK2/TLR2/BIRC3/TICAM1/RFTN1/CNPY3/UNC93B1/TNIP2/IRF1/RSAD2/NR1D1/UBC/IKBKG/IRF3/DAB2IP/INAVA/PGLYRP4/NOP53/DHX58/MAP3K1/RIPK2/UBE2V1/CTSB	40
BP	GO:0001655	urogenital system development	69|2653	299|14725	0.0149977	0.171045	ENSG00000091831/ENSG00000184292/ENSG00000129514/ENSG00000107485/ENSG00000188064/ENSG00000119888/ENSG00000100311/ENSG00000132470/ENSG00000176788/ENSG00000164690/ENSG00000196562/ENSG00000170561/ENSG00000165731/ENSG00000005884/ENSG00000248905/ENSG00000100373/ENSG00000124145/ENSG00000172818/ENSG00000168743/ENSG00000092969/ENSG00000099250/ENSG00000115884/ENSG00000131759/ENSG00000125618/ENSG00000101144…	ESR1/TACSTD2/FOXA1/GATA3/WNT7B/EPCAM/PDGFB/ITGB4/BASP1/SHH/SULF2/IRX2/RET/ITGA3/FMN1/UPK3A/SDC4/OVOL1/NPNT/TGFB2/NRP1/SDC1/RARA/PAX8/BMP7/MMP17/WNT4/RXRA/SOX11/TP63/AR/EPHB3/LAMA5/RARG/OSR2/PDGFA/GLIS2/EGR1/PODXL/FSTL3/NOTCH3/CRIP1/CRLF1/GCNT1/STRA6/TNS2/TFAP2A/CDKN1B/ASS1/JAG1/SMAD3/LAMB2/ARID5B/SERPINB5/NOTCH1/WFS1/CTNNBIP1/IRX3/CTSH/VEGFA/LIF/HES1/SMAD6/APH1A/PSAP/EFNB2/SMAD7/REN/NPHS1	69
BP	GO:0002287	alpha-beta T cell activation involved in immune response	15|2653	47|14725	0.0151192	0.171045	ENSG00000107485/ENSG00000069399/ENSG00000156127/ENSG00000171522/ENSG00000131759/ENSG00000160685/ENSG00000113916/ENSG00000196189/ENSG00000179588/ENSG00000104856/ENSG00000143365/ENSG00000118513/ENSG00000197272/ENSG00000101665/ENSG00000104312	GATA3/BCL3/BATF/PTGER4/RARA/ZBTB7B/BCL6/SEMA4A/ZFPM1/RELB/RORC/MYB/IL27/SMAD7/RIPK2	15
BP	GO:0002293	alpha-beta T cell differentiation involved in immune response	15|2653	47|14725	0.0151192	0.171045	ENSG00000107485/ENSG00000069399/ENSG00000156127/ENSG00000171522/ENSG00000131759/ENSG00000160685/ENSG00000113916/ENSG00000196189/ENSG00000179588/ENSG00000104856/ENSG00000143365/ENSG00000118513/ENSG00000197272/ENSG00000101665/ENSG00000104312	GATA3/BCL3/BATF/PTGER4/RARA/ZBTB7B/BCL6/SEMA4A/ZFPM1/RELB/RORC/MYB/IL27/SMAD7/RIPK2	15
BP	GO:0009311	oligosaccharide metabolic process	15|2653	47|14725	0.0151192	0.171045	ENSG00000165140/ENSG00000008513/ENSG00000169255/ENSG00000148488/ENSG00000070731/ENSG00000086062/ENSG00000117394/ENSG00000113532/ENSG00000110080/ENSG00000127415/ENSG00000013288/ENSG00000171298/ENSG00000130957/ENSG00000177239/ENSG00000115525	FBP1/ST3GAL1/B3GALNT1/ST8SIA6/ST6GALNAC2/B4GALT1/SLC2A1/ST8SIA4/ST3GAL4/IDUA/MAN2B2/GAA/FBP2/MAN1B1/ST3GAL5	15
BP	GO:0048008	platelet-derived growth factor receptor signaling pathway	15|2653	47|14725	0.0151192	0.171045	ENSG00000100311/ENSG00000189058/ENSG00000109062/ENSG00000099250/ENSG00000265972/ENSG00000197461/ENSG00000144655/ENSG00000149177/ENSG00000057593/ENSG00000103034/ENSG00000050820/ENSG00000150347/ENSG00000130787/ENSG00000112715/ENSG00000196396	PDGFB/APOD/SLC9A3R1/NRP1/TXNIP/PDGFA/CSRNP1/PTPRJ/F7/NDRG4/BCAR1/ARID5B/HIP1R/VEGFA/PTPN1	15
BP	GO:0050819	negative regulation of coagulation	15|2653	47|14725	0.0151192	0.171045	ENSG00000137801/ENSG00000100311/ENSG00000178726/ENSG00000010278/ENSG00000183044/ENSG00000078401/ENSG00000182718/ENSG00000197461/ENSG00000003436/ENSG00000163932/ENSG00000196975/ENSG00000131187/ENSG00000149131/ENSG00000249853/ENSG00000106366	THBS1/PDGFB/THBD/CD9/ABAT/EDN1/ANXA2/PDGFA/TFPI/PRKCD/ANXA4/F12/SERPING1/HS3ST5/SERPINE1	15
BP	GO:0006942	regulation of striated muscle contraction	22|2653	77|14725	0.0151589	0.171045	ENSG00000159167/ENSG00000173801/ENSG00000129682/ENSG00000130529/ENSG00000163874/ENSG00000090020/ENSG00000183963/ENSG00000159173/ENSG00000143153/ENSG00000105974/ENSG00000196924/ENSG00000057294/ENSG00000198929/ENSG00000183230/ENSG00000135124/ENSG00000096696/ENSG00000104936/ENSG00000173020/ENSG00000111678/ENSG00000101665/ENSG00000138622/ENSG00000198668	STC1/JUP/FGF13/TRPM4/ZC3H12A/SLC9A1/SMTN/TNNI1/ATP1B1/CAV1/FLNA/PKP2/NOS1AP/CTNNA3/P2RX4/DSP/DMPK/GRK2/C12orf57/SMAD7/HCN4/CALM1	22
BP	GO:0032609	interferon-gamma production	22|2653	77|14725	0.0151589	0.171045	ENSG00000107485/ENSG00000069399/ENSG00000187608/ENSG00000131759/ENSG00000188372/ENSG00000134258/ENSG00000161031/ENSG00000179588/ENSG00000163874/ENSG00000018280/ENSG00000123999/ENSG00000126353/ENSG00000196126/ENSG00000182393/ENSG00000172575/ENSG00000103855/ENSG00000197272/ENSG00000122641/ENSG00000174775/ENSG00000103490/ENSG00000104312/ENSG00000163251	GATA3/BCL3/ISG15/RARA/ZP3/VTCN1/PGLYRP2/ZFPM1/ZC3H12A/SLC11A1/INHA/CCR7/HLA-DRB1/IFNL1/RASGRP1/CD276/IL27/INHBA/HRAS/PYCARD/RIPK2/FZD5	22
BP	GO:2000379	positive regulation of reactive oxygen species metabolic process	22|2653	77|14725	0.0151589	0.171045	ENSG00000137801/ENSG00000100311/ENSG00000176884/ENSG00000090339/ENSG00000124762/ENSG00000196139/ENSG00000078401/ENSG00000136826/ENSG00000051523/ENSG00000163874/ENSG00000120885/ENSG00000163932/ENSG00000142208/ENSG00000169896/ENSG00000130707/ENSG00000127666/ENSG00000153823/ENSG00000166949/ENSG00000198929/ENSG00000135124/ENSG00000177885/ENSG00000181790	THBS1/PDGFB/GRIN1/ICAM1/CDKN1A/AKR1C3/EDN1/KLF4/CYBA/ZC3H12A/CLU/PRKCD/AKT1/ITGAM/ASS1/TICAM1/PID1/SMAD3/NOS1AP/P2RX4/GRB2/ADGRB1	22
BP	GO:0010719	negative regulation of epithelial to mesenchymal transition	10|2653	27|14725	0.0151894	0.171045	ENSG00000129514/ENSG00000169242/ENSG00000092969/ENSG00000105707/ENSG00000168675/ENSG00000125850/ENSG00000168140/ENSG00000136848/ENSG00000101665/ENSG00000167985	FOXA1/EFNA1/TGFB2/HPN/LDLRAD4/OVOL2/VASN/DAB2IP/SMAD7/SDHAF2	10
BP	GO:0006941	striated muscle contraction	38|2653	150|14725	0.015302	0.171045	ENSG00000159167/ENSG00000198125/ENSG00000173801/ENSG00000162989/ENSG00000055118/ENSG00000130529/ENSG00000162004/ENSG00000163874/ENSG00000090020/ENSG00000108443/ENSG00000104881/ENSG00000183963/ENSG00000105711/ENSG00000159173/ENSG00000143153/ENSG00000105974/ENSG00000080709/ENSG00000140416/ENSG00000196924/ENSG00000105357/ENSG00000057294/ENSG00000198929/ENSG00000130598/ENSG00000171385/ENSG00000183230…	STC1/MB/JUP/KCNJ3/KCNH2/TRPM4/CCDC78/ZC3H12A/SLC9A1/RPS6KB1/PPP1R13L/SMTN/SCN1B/TNNI1/ATP1B1/CAV1/KCNN2/TPM1/FLNA/MYH14/PKP2/NOS1AP/TNNI2/KCND3/CTNNA3/P2RX4/DSP/DMPK/GRK2/C12orf57/GAA/CACNA1D/NEDD4L/FGF12/SMAD7/HCN4/OBSL1/CALM1	38
BP	GO:0008202	steroid metabolic process	62|2653	265|14725	0.0153111	0.171045	ENSG00000091831/ENSG00000081923/ENSG00000088002/ENSG00000164690/ENSG00000160179/ENSG00000138061/ENSG00000113494/ENSG00000100867/ENSG00000151632/ENSG00000160211/ENSG00000196139/ENSG00000196557/ENSG00000184860/ENSG00000149809/ENSG00000204740/ENSG00000099377/ENSG00000162552/ENSG00000072310/ENSG00000186350/ENSG00000006025/ENSG00000187134/ENSG00000140465/ENSG00000120738/ENSG00000241635/ENSG00000143365…	ESR1/ATP8B1/SULT2B1/SHH/ABCG1/CYP1B1/PRLR/DHRS2/AKR1C2/G6PD/AKR1C3/CACNA1H/SDR42E1/TM7SF2/MALRD1/HSD3B7/WNT4/SREBF1/RXRA/OSBPL7/AKR1C1/CYP1A1/EGR1/UGT1A1/RORC/SOAT2/TRERF1/LSS/VDR/LDLR/MVD/NR5A2/ABCA1/COMT/WWOX/CYP24A1/APOBR/HSD11B2/SULT1A1/POR/ACAA1/LRP5/DISP3/FASN/CYP2A6/LAMTOR1/SULT1A2/NR1D1/AKR1B15/VLDLR/DHCR7/OSBPL2/PLPP6/SNAI1/ACOT8/HMGCS2/SCARB1/LMF1/MBTPS1/SLC27A5/NFE2L1/ACADVL	62
BP	GO:0006687	glycosphingolipid metabolic process	19|2653	64|14725	0.0153123	0.171045	ENSG00000006756/ENSG00000169255/ENSG00000148488/ENSG00000128274/ENSG00000144455/ENSG00000141337/ENSG00000158220/ENSG00000133424/ENSG00000064601/ENSG00000113532/ENSG00000163932/ENSG00000103056/ENSG00000148154/ENSG00000104763/ENSG00000139641/ENSG00000197746/ENSG00000115525/ENSG00000224051/ENSG00000170266	ARSD/B3GALNT1/ST8SIA6/A4GALT/SUMF1/ARSG/ESYT3/LARGE1/CTSA/ST8SIA4/PRKCD/SMPD3/UGCG/ASAH1/ESYT1/PSAP/ST3GAL5/CPTP/GLB1	19
BP	GO:0002691	regulation of cellular extravasation	7|2653	16|14725	0.0153293	0.171045	ENSG00000107562/ENSG00000090339/ENSG00000115594/ENSG00000171522/ENSG00000151882/ENSG00000159842/ENSG00000151651	CXCL12/ICAM1/IL1R1/PTGER4/CCL28/ABR/ADAM8	7
BP	GO:0032495	response to muramyl dipeptide	7|2653	16|14725	0.0153293	0.171045	ENSG00000128604/ENSG00000100906/ENSG00000187796/ENSG00000101384/ENSG00000148400/ENSG00000163362/ENSG00000104312	IRF5/NFKBIA/CARD9/JAG1/NOTCH1/INAVA/RIPK2	7
BP	GO:0032891	negative regulation of organic acid transport	7|2653	16|14725	0.0153293	0.171045	ENSG00000137801/ENSG00000183044/ENSG00000153246/ENSG00000142208/ENSG00000101180/ENSG00000164129/ENSG00000105221	THBS1/ABAT/PLA2R1/AKT1/HRH3/NPY5R/AKT2	7
BP	GO:1900151	regulation of nuclear-transcribed mRNA catabolic process, deadenylation-dependent decay	7|2653	16|14725	0.0153293	0.171045	ENSG00000128016/ENSG00000141232/ENSG00000152518/ENSG00000185650/ENSG00000070756/ENSG00000159388/ENSG00000168002	ZFP36/TOB1/ZFP36L2/ZFP36L1/PABPC1/BTG2/POLR2G	7
BP	GO:1900153	positive regulation of nuclear-transcribed mRNA catabolic process, deadenylation-dependent decay	7|2653	16|14725	0.0153293	0.171045	ENSG00000128016/ENSG00000141232/ENSG00000152518/ENSG00000185650/ENSG00000070756/ENSG00000159388/ENSG00000168002	ZFP36/TOB1/ZFP36L2/ZFP36L1/PABPC1/BTG2/POLR2G	7
BP	GO:1905314	semi-lunar valve development	7|2653	16|14725	0.0153293	0.171045	ENSG00000107485/ENSG00000169242/ENSG00000092969/ENSG00000137868/ENSG00000101384/ENSG00000148400/ENSG00000137834	GATA3/EFNA1/TGFB2/STRA6/JAG1/NOTCH1/SMAD6	7
BP	GO:0045814	negative regulation of gene expression, epigenetic	30|2653	113|14725	0.0153428	0.171045	ENSG00000180573/ENSG00000278828/ENSG00000158406/ENSG00000246705/ENSG00000196787/ENSG00000273983/ENSG00000196747/ENSG00000277075/ENSG00000170836/ENSG00000197837/ENSG00000184260/ENSG00000274267/ENSG00000183598/ENSG00000276368/ENSG00000273542/ENSG00000270276/ENSG00000272196/ENSG00000132475/ENSG00000203812/ENSG00000275714/ENSG00000276903/ENSG00000274750/ENSG00000182095/ENSG00000188486/ENSG00000181218…	HIST1H2AC/HIST1H3H/HIST1H4H/H2AFJ/HIST1H2AG/HIST1H3G/HIST1H2AI/HIST1H2AE/PPM1D/HIST4H4/HIST2H2AC/HIST1H3B/HIST2H3D/HIST1H2AJ/HIST1H4K/HIST2H4B/HIST2H2AA4/H3F3B/HIST2H2AA3/HIST1H3A/HIST1H2AL/HIST1H3E/TNRC18/H2AFX/HIST3H2A/HIST1H4I/HIST2H2AB/JARID2/HIST2H4A/HIST1H3J	30
BP	GO:1905477	positive regulation of protein localization to membrane	30|2653	113|14725	0.0153428	0.171045	ENSG00000175793/ENSG00000106541/ENSG00000130762/ENSG00000005884/ENSG00000104081/ENSG00000164850/ENSG00000122679/ENSG00000073282/ENSG00000145675/ENSG00000015475/ENSG00000170379/ENSG00000142208/ENSG00000169896/ENSG00000174827/ENSG00000105327/ENSG00000103888/ENSG00000214253/ENSG00000185043/ENSG00000142627/ENSG00000264364/ENSG00000027075/ENSG00000197879/ENSG00000127831/ENSG00000088808/ENSG00000161011…	SFN/AGR2/ARHGEF16/ITGA3/BMF/GPER1/RAMP3/TP63/PIK3R1/BID/TCAF2/AKT1/ITGAM/PDZK1/BBC3/CEMIP/FIS1/CIB1/EPHA2/DYNLL2/PRKCH/MYO1C/VIL1/PPP1R13B/SQSTM1/KCNJ11/MIEF2/AKT2/ERBB2/TCAF1	30
BP	GO:0042089	cytokine biosynthetic process	24|2653	86|14725	0.0155016	0.171608	ENSG00000137801/ENSG00000107485/ENSG00000163083/ENSG00000069399/ENSG00000172936/ENSG00000106211/ENSG00000128016/ENSG00000136826/ENSG00000179588/ENSG00000120738/ENSG00000123999/ENSG00000172216/ENSG00000123609/ENSG00000185187/ENSG00000162889/ENSG00000187796/ENSG00000127666/ENSG00000115009/ENSG00000125347/ENSG00000103855/ENSG00000197272/ENSG00000126456/ENSG00000122641/ENSG00000069020	THBS1/GATA3/INHBB/BCL3/MYD88/HSPB1/ZFP36/KLF4/ZFPM1/EGR1/INHA/CEBPB/NMI/SIGIRR/MAPKAPK2/CARD9/TICAM1/CCL20/IRF1/CD276/IL27/IRF3/INHBA/MAST4	24
BP	GO:0048013	ephrin receptor signaling pathway	24|2653	86|14725	0.0155016	0.171608	ENSG00000176884/ENSG00000169242/ENSG00000146904/ENSG00000101608/ENSG00000182580/ENSG00000243364/ENSG00000130429/ENSG00000100985/ENSG00000183317/ENSG00000160293/ENSG00000142627/ENSG00000214944/ENSG00000241553/ENSG00000196411/ENSG00000075624/ENSG00000143590/ENSG00000161203/ENSG00000042753/ENSG00000117362/ENSG00000174775/ENSG00000134215/ENSG00000125266/ENSG00000106299/ENSG00000140538	GRIN1/EFNA1/EPHA1/MYL12A/EPHB3/EFNA4/ARPC1B/MMP9/EPHA10/VAV2/EPHA2/ARHGEF28/ARPC4/EPHB4/ACTB/EFNA3/AP2M1/AP2S1/APH1A/HRAS/VAV3/EFNB2/WASL/NTRK3	24
BP	GO:0050732	negative regulation of peptidyl-tyrosine phosphorylation	14|2653	43|14725	0.0155181	0.171608	ENSG00000013588/ENSG00000111679/ENSG00000184557/ENSG00000101213/ENSG00000173193/ENSG00000185338/ENSG00000131370/ENSG00000105974/ENSG00000163932/ENSG00000158856/ENSG00000013364/ENSG00000159733/ENSG00000142273/ENSG00000197114	GPRC5A/PTPN6/SOCS3/PTK6/PARP14/SOCS1/SH3BP5/CAV1/PRKCD/DMTN/MVP/ZFYVE28/CBLC/ZGPAT	14
BP	GO:0019079	viral genome replication	28|2653	104|14725	0.0155454	0.171608	ENSG00000142089/ENSG00000187608/ENSG00000157601/ENSG00000111331/ENSG00000166801/ENSG00000135114/ENSG00000130303/ENSG00000178685/ENSG00000163874/ENSG00000089127/ENSG00000172183/ENSG00000185201/ENSG00000134248/ENSG00000169429/ENSG00000108691/ENSG00000130813/ENSG00000116833/ENSG00000185885/ENSG00000139144/ENSG00000124164/ENSG00000070756/ENSG00000148400/ENSG00000134321/ENSG00000173020/ENSG00000139546…	IFITM3/ISG15/MX1/OAS3/FAM111A/OASL/BST2/PARP10/ZC3H12A/OAS1/ISG20/IFITM2/LAMTOR5/CXCL8/CCL2/C19orf66/NR5A2/IFITM1/PIK3C2G/VAPB/PABPC1/NOTCH1/RSAD2/GRK2/TARBP2/PCBP1/ADARB1/ATG16L2	28
BP	GO:0045598	regulation of fat cell differentiation	28|2653	104|14725	0.0155454	0.171608	ENSG00000107485/ENSG00000128016/ENSG00000100219/ENSG00000130529/ENSG00000180694/ENSG00000164850/ENSG00000161642/ENSG00000179588/ENSG00000163874/ENSG00000152518/ENSG00000140044/ENSG00000143365/ENSG00000185650/ENSG00000142208/ENSG00000101255/ENSG00000172216/ENSG00000120149/ENSG00000176845/ENSG00000101384/ENSG00000166949/ENSG00000106538/ENSG00000175197/ENSG00000162337/ENSG00000126368/ENSG00000114315…	GATA3/ZFP36/XBP1/TRPM4/TMEM64/GPER1/ZNF385A/ZFPM1/ZC3H12A/ZFP36L2/JDP2/RORC/ZFP36L1/AKT1/TRIB3/CEBPB/MSX2/METRNL/JAG1/SMAD3/RARRES2/DDIT3/LRP5/NR1D1/HES1/TRPV4/SORT1/VSTM2A	28
BP	GO:0001953	negative regulation of cell-matrix adhesion	11|2653	31|14725	0.0157051	0.172695	ENSG00000137801/ENSG00000189058/ENSG00000141376/ENSG00000113916/ENSG00000145675/ENSG00000196581/ENSG00000177076/ENSG00000158856/ENSG00000143537/ENSG00000101384/ENSG00000106366	THBS1/APOD/BCAS3/BCL6/PIK3R1/AJAP1/ACER2/DMTN/ADAM15/JAG1/SERPINE1	11
BP	GO:0060674	placenta blood vessel development	11|2653	31|14725	0.0157051	0.172695	ENSG00000166145/ENSG00000184557/ENSG00000171223/ENSG00000142208/ENSG00000125850/ENSG00000136720/ENSG00000185551/ENSG00000161714/ENSG00000175592/ENSG00000114315/ENSG00000163251	SPINT1/SOCS3/JUNB/AKT1/OVOL2/HS6ST1/NR2F2/PLCD3/FOSL1/HES1/FZD5	11
BP	GO:0072175	epithelial tube formation	33|2653	127|14725	0.0157424	0.172768	ENSG00000166145/ENSG00000149418/ENSG00000107485/ENSG00000167642/ENSG00000158055/ENSG00000101115/ENSG00000170561/ENSG00000165731/ENSG00000124145/ENSG00000092969/ENSG00000131759/ENSG00000125618/ENSG00000101144/ENSG00000196576/ENSG00000162552/ENSG00000176887/ENSG00000138771/ENSG00000168758/ENSG00000083307/ENSG00000172819/ENSG00000125753/ENSG00000128567/ENSG00000074219/ENSG00000106078/ENSG00000110195…	SPINT1/ST14/GATA3/SPINT2/GRHL3/SALL4/IRX2/RET/SDC4/TGFB2/RARA/PAX8/BMP7/PLXNB2/WNT4/SOX11/SHROOM3/SEMA4C/GRHL2/RARG/VASP/PODXL/TEAD2/COBL/FOLR1/OVOL2/CITED2/CELSR1/ARHGAP35/CFL1/IRX3/IFT122/DVL3	33
BP	GO:0048048	embryonic eye morphogenesis	12|2653	35|14725	0.015873	0.173863	ENSG00000121068/ENSG00000115380/ENSG00000101144/ENSG00000176887/ENSG00000163349/ENSG00000172819/ENSG00000180176/ENSG00000184254/ENSG00000137868/ENSG00000137203/ENSG00000164442/ENSG00000163251	TBX2/EFEMP1/BMP7/SOX11/HIPK1/RARG/TH/ALDH1A3/STRA6/TFAP2A/CITED2/FZD5	12
BP	GO:0046209	nitric oxide metabolic process	18|2653	60|14725	0.0161143	0.175706	ENSG00000181019/ENSG00000138061/ENSG00000090339/ENSG00000078401/ENSG00000136826/ENSG00000163874/ENSG00000120885/ENSG00000105974/ENSG00000142208/ENSG00000137462/ENSG00000130707/ENSG00000127666/ENSG00000166949/ENSG00000003989/ENSG00000127948/ENSG00000198929/ENSG00000135124/ENSG00000131979	NQO1/CYP1B1/ICAM1/EDN1/KLF4/ZC3H12A/CLU/CAV1/AKT1/TLR2/ASS1/TICAM1/SMAD3/SLC7A2/POR/NOS1AP/P2RX4/GCH1	18
BP	GO:0048844	artery morphogenesis	18|2653	60|14725	0.0161143	0.175706	ENSG00000121068/ENSG00000168542/ENSG00000092969/ENSG00000099250/ENSG00000108175/ENSG00000074181/ENSG00000137868/ENSG00000110195/ENSG00000101384/ENSG00000164442/ENSG00000148400/ENSG00000112715/ENSG00000114315/ENSG00000103148/ENSG00000128917/ENSG00000125266/ENSG00000101665/ENSG00000189079	TBX2/COL3A1/TGFB2/NRP1/ZMIZ1/NOTCH3/STRA6/FOLR1/JAG1/CITED2/NOTCH1/VEGFA/HES1/NPRL3/DLL4/EFNB2/SMAD7/ARID2	18
BP	GO:0007178	transmembrane receptor protein serine/threonine kinase signaling pathway	69|2653	300|14725	0.0161347	0.175706	ENSG00000137801/ENSG00000107984/ENSG00000130513/ENSG00000163083/ENSG00000164690/ENSG00000095739/ENSG00000124225/ENSG00000124813/ENSG00000168542/ENSG00000186174/ENSG00000125968/ENSG00000242265/ENSG00000005884/ENSG00000102981/ENSG00000168743/ENSG00000170345/ENSG00000092969/ENSG00000141232/ENSG00000260428/ENSG00000101144/ENSG00000168874/ENSG00000010704/ENSG00000176887/ENSG00000155090/ENSG00000043143…	THBS1/DKK1/GDF15/INHBB/SHH/BAMBI/PMEPA1/RUNX2/COL3A1/BCL9L/ID1/PEG10/ITGA3/PARD6A/NPNT/FOS/TGFB2/TOB1/SCX/BMP7/ATOH8/HFE/SOX11/KLF10/JADE2/RBPMS/CGN/LRG1/EGR1/INHA/FSTL3/CAV1/PXN/MSX2/F11R/TGFB3/FOLR1/LDLRAD4/NOV/ITGB5/VIM/SMAD3/PTPRK/CITED2/VASN/CHRD/FAM83G/GIPC1/NUMA1/WFIKKN1/NOTCH1/CDKN2B/FURIN/HES1/UBC/TRIM33/ZYX/SMAD6/INHBA/GLG1/FBXL15/SMAD7/ONECUT1/CAV2/MAPK3/ZC3H3/SMURF1/FKBP8/CDH5	69
BP	GO:0010466	negative regulation of peptidase activity	48|2653	198|14725	0.0162508	0.17629	ENSG00000137801/ENSG00000079257/ENSG00000166145/ENSG00000175793/ENSG00000167642/ENSG00000026508/ENSG00000104689/ENSG00000130303/ENSG00000136826/ENSG00000011201/ENSG00000125730/ENSG00000160111/ENSG00000121552/ENSG00000140939/ENSG00000126709/ENSG00000003436/ENSG00000175315/ENSG00000142208/ENSG00000181788/ENSG00000134248/ENSG00000100985/ENSG00000170542/ENSG00000166401/ENSG00000166535/ENSG00000023445…	THBS1/LXN/SPINT1/SFN/SPINT2/CD44/TNFRSF10A/BST2/KLF4/ANOS1/C3/CPAMD8/CSTA/NOL3/IFI6/TFPI/CST6/AKT1/SIAH2/LAMTOR5/MMP9/SERPINB9/SERPINB8/A2ML1/BIRC3/AMBP/NGFR/SERPINA5/POR/RENBP/SERPINB5/WFIKKN1/FURIN/UMODL1/WNT9A/SERPINA3/SERPING1/VEGFA/VIL1/CST3/SERPINH1/ARRB1/WFDC2/SPINK4/MICAL1/CSTB/SERPINB1/SERPINE1	48
BP	GO:0050730	regulation of peptidyl-tyrosine phosphorylation	48|2653	198|14725	0.0162508	0.17629	ENSG00000065361/ENSG00000013588/ENSG00000100311/ENSG00000111679/ENSG00000178078/ENSG00000184557/ENSG00000175920/ENSG00000026508/ENSG00000101213/ENSG00000163235/ENSG00000090339/ENSG00000169242/ENSG00000138496/ENSG00000173193/ENSG00000178568/ENSG00000175505/ENSG00000099250/ENSG00000185338/ENSG00000131370/ENSG00000186891/ENSG00000197461/ENSG00000153064/ENSG00000105974/ENSG00000163932/ENSG00000158856…	ERBB3/GPRC5A/PDGFB/PTPN6/STAP2/SOCS3/DOK7/CD44/PTK6/TGFA/ICAM1/EFNA1/PARP9/PARP14/ERBB4/CLCF1/NRP1/SOCS1/SH3BP5/TNFRSF18/PDGFA/BANK1/CAV1/PRKCD/DMTN/TNFRSF1A/IL20/AREG/CRLF1/MVP/ADRA2B/ZFYVE28/IL24/IFNL1/CBLC/AFAP1L2/VEGFA/LIF/HES1/ADRA2C/EGF/ZGPAT/SHC1/IL11/PTPN1/TNK2/RIPK2/VEGFC	48
BP	GO:0048762	mesenchymal cell differentiation	44|2653	179|14725	0.0163871	0.17741	ENSG00000129514/ENSG00000164690/ENSG00000095739/ENSG00000169242/ENSG00000001617/ENSG00000186174/ENSG00000178568/ENSG00000165731/ENSG00000078401/ENSG00000075223/ENSG00000092969/ENSG00000099250/ENSG00000101144/ENSG00000162552/ENSG00000176887/ENSG00000130702/ENSG00000130558/ENSG00000157554/ENSG00000115109/ENSG00000105707/ENSG00000120149/ENSG00000143537/ENSG00000119699/ENSG00000110195/ENSG00000168675…	FOXA1/SHH/BAMBI/EFNA1/SEMA3F/BCL9L/ERBB4/RET/EDN1/SEMA3C/TGFB2/NRP1/BMP7/WNT4/SOX11/LAMA5/OLFM1/ERG/EPB41L5/HPN/MSX2/ADAM15/TGFB3/FOLR1/LDLRAD4/JAG1/SMAD3/OVOL2/CITED2/VASN/NOTCH1/CUL7/PDCD6/CFL1/LOXL2/HES1/DAB2IP/DAG1/ELL3/SNAI1/SMAD7/MAPK3/S100A4/SDHAF2	44
BP	GO:0030833	regulation of actin filament polymerization	34|2653	132|14725	0.016417	0.17741	ENSG00000124126/ENSG00000006747/ENSG00000161905/ENSG00000090339/ENSG00000205542/ENSG00000248905/ENSG00000102879/ENSG00000148180/ENSG00000125753/ENSG00000106526/ENSG00000126353/ENSG00000172725/ENSG00000163932/ENSG00000158856/ENSG00000130429/ENSG00000015285/ENSG00000101336/ENSG00000241553/ENSG00000204991/ENSG00000085733/ENSG00000130787/ENSG00000006606/ENSG00000197879/ENSG00000127831/ENSG00000254999…	PREX1/SCIN/ALOX15/ICAM1/TMSB4X/FMN1/CORO1A/GSN/VASP/ACTR3C/CCR7/CORO1B/PRKCD/DMTN/ARPC1B/WAS/HCK/ARPC4/SPIRE2/CTTN/HIP1R/CCL26/MYO1C/VIL1/BRK1/ARPC5L/TMOD3/GRB2/CYFIP1/MYADM/PYCARD/CAPG/WASL/NPHS1	34
BP	GO:0098773	skin epidermis development	23|2653	82|14725	0.0165305	0.178295	ENSG00000107984/ENSG00000062038/ENSG00000164690/ENSG00000175707/ENSG00000092969/ENSG00000073282/ENSG00000115461/ENSG00000128422/ENSG00000130702/ENSG00000197461/ENSG00000123364/ENSG00000120149/ENSG00000087460/ENSG00000167968/ENSG00000102871/ENSG00000137497/ENSG00000075275/ENSG00000148400/ENSG00000109101/ENSG00000197535/ENSG00000122641/ENSG00000163472/ENSG00000124216	DKK1/CDH3/SHH/KDF1/TGFB2/TP63/IGFBP5/KRT17/LAMA5/PDGFA/HOXC13/MSX2/GNAS/DNASE1L2/TRADD/NUMA1/CELSR1/NOTCH1/FOXN1/MYO5A/INHBA/TMEM79/SNAI1	23
BP	GO:1903844	regulation of cellular response to transforming growth factor beta stimulus	27|2653	100|14725	0.0166539	0.179269	ENSG00000137801/ENSG00000095739/ENSG00000124225/ENSG00000186174/ENSG00000242265/ENSG00000005884/ENSG00000168743/ENSG00000176887/ENSG00000171236/ENSG00000105974/ENSG00000119699/ENSG00000110195/ENSG00000168675/ENSG00000166949/ENSG00000164442/ENSG00000168140/ENSG00000123159/ENSG00000127578/ENSG00000147883/ENSG00000150991/ENSG00000197323/ENSG00000137834/ENSG00000090863/ENSG00000101665/ENSG00000169856…	THBS1/BAMBI/PMEPA1/BCL9L/PEG10/ITGA3/NPNT/SOX11/LRG1/CAV1/TGFB3/FOLR1/LDLRAD4/SMAD3/CITED2/VASN/GIPC1/WFIKKN1/CDKN2B/UBC/TRIM33/SMAD6/GLG1/SMAD7/ONECUT1/CAV2/SMURF1	27
BP	GO:0030098	lymphocyte differentiation	63|2653	271|14725	0.0166843	0.179269	ENSG00000107485/ENSG00000124126/ENSG00000069399/ENSG00000111679/ENSG00000164690/ENSG00000100097/ENSG00000124813/ENSG00000156127/ENSG00000106003/ENSG00000101096/ENSG00000179388/ENSG00000100219/ENSG00000159216/ENSG00000175505/ENSG00000171522/ENSG00000131759/ENSG00000160685/ENSG00000162552/ENSG00000113916/ENSG00000196189/ENSG00000185338/ENSG00000135905/ENSG00000161031/ENSG00000179588/ENSG00000186891…	GATA3/PREX1/BCL3/PTPN6/SHH/LGALS1/RUNX2/BATF/LFNG/NFATC2/EGR3/XBP1/RUNX1/CLCF1/PTGER4/RARA/ZBTB7B/WNT4/BCL6/SEMA4A/SOCS1/DOCK10/PGLYRP2/ZFPM1/TNFRSF18/PIK3R1/ZFP36L2/EGR1/RELB/INHA/RORC/CCR7/ZFP36L1/ZMIZ1/ITM2A/MYB/BLNK/SOX13/JAG2/BCL11B/DOCK2/IFNL1/IRF1/RSAD2/RHOH/RASGRP1/FOXN1/ADAM8/DLL4/IL27/INHBA/PATZ1/IL11/TCF3/CLPTM1/MAFB/SMAD7/LY6D/ONECUT1/RIPK2/FZD5/ERBB2/VAV1	63
BP	GO:0060047	heart contraction	56|2653	237|14725	0.0168455	0.180527	ENSG00000075461/ENSG00000089356/ENSG00000099337/ENSG00000124249/ENSG00000102683/ENSG00000159167/ENSG00000074370/ENSG00000121068/ENSG00000116016/ENSG00000173801/ENSG00000162989/ENSG00000055118/ENSG00000078401/ENSG00000196557/ENSG00000092969/ENSG00000130529/ENSG00000184719/ENSG00000167535/ENSG00000072310/ENSG00000163874/ENSG00000090020/ENSG00000180176/ENSG00000104881/ENSG00000183963/ENSG00000105711…	CACNG4/FXYD3/KCNK6/KCNK15/SGCG/STC1/ATP2A3/TBX2/EPAS1/JUP/KCNJ3/KCNH2/EDN1/CACNA1H/TGFB2/TRPM4/RNLS/CACNB3/SREBF1/ZC3H12A/SLC9A1/TH/PPP1R13L/SMTN/SCN1B/TNNI1/EDN2/ATP1B1/CAV1/ITPR3/KCNN2/TPM1/FLNA/IRX5/KCNK1/KCNK3/PKP2/NOS1AP/TNNI2/KCND3/CTNNA3/P2RX4/DSP/ITPR1/DMPK/GRK2/CACNG1/KCNJ11/GAA/CACNA1D/NEDD4L/FGF12/SMAD7/HCN4/GCH1/CALM1	56
BP	GO:0015711	organic anion transport	88|2653	395|14725	0.0168654	0.180527	ENSG00000137801/ENSG00000074410/ENSG00000081923/ENSG00000108846/ENSG00000160179/ENSG00000214530/ENSG00000144452/ENSG00000183044/ENSG00000176463/ENSG00000108932/ENSG00000109062/ENSG00000268104/ENSG00000182107/ENSG00000118596/ENSG00000101276/ENSG00000168398/ENSG00000141526/ENSG00000078401/ENSG00000110436/ENSG00000101188/ENSG00000168907/ENSG00000167434/ENSG00000104783/ENSG00000153246/ENSG00000186350…	THBS1/CA12/ATP8B1/ABCC3/ABCG1/STARD10/ABCA12/ABAT/SLCO3A1/SLC16A6/SLC9A3R1/SLC6A14/TMEM30B/SLC16A7/SLC52A3/BDKRB2/SLC16A3/EDN1/SLC1A2/NTSR1/PLA2G4F/CA4/KCNN4/PLA2R1/RXRA/AKR1C1/CPT1A/ATP9A/SLC6A6/SLC6A9/PLA2G3/SLC2A1/SLCO4A1/SLC7A5/SLC26A1/PITPNC1/PRKCD/AKT1/SLC10A3/OSBPL10/SLC4A8/SLC25A29/SLC35B2/LDLR/FOLR1/ABCA1/SLC4A2/SLC3A2/SLC25A25/SLC7A2/STX1A/SLC25A6/SNAP25/PPFIA3/GIPC1/CA9/ABCA4/ABCC5/SLC…	88
BP	GO:0043536	positive regulation of blood vessel endothelial cell migration	17|2653	56|14725	0.0169116	0.180678	ENSG00000137801/ENSG00000100311/ENSG00000145632/ENSG00000106211/ENSG00000205542/ENSG00000099250/ENSG00000126561/ENSG00000142208/ENSG00000185043/ENSG00000135124/ENSG00000112715/ENSG00000124181/ENSG00000156427/ENSG00000207607/ENSG00000105287/ENSG00000061273/ENSG00000150630	THBS1/PDGFB/PLK2/HSPB1/TMSB4X/NRP1/STAT5A/AKT1/CIB1/P2RX4/VEGFA/PLCG1/FGF18/MIR200A/PRKD2/HDAC7/VEGFC	17
BP	GO:0031345	negative regulation of cell projection organization	38|2653	151|14725	0.0169905	0.181179	ENSG00000184292/ENSG00000145632/ENSG00000185924/ENSG00000100097/ENSG00000198753/ENSG00000169242/ENSG00000001617/ENSG00000125968/ENSG00000005884/ENSG00000111490/ENSG00000129682/ENSG00000099250/ENSG00000112902/ENSG00000105695/ENSG00000089820/ENSG00000053108/ENSG00000083290/ENSG00000143418/ENSG00000076864/ENSG00000163932/ENSG00000138814/ENSG00000007944/ENSG00000137261/ENSG00000185043/ENSG00000109099…	TACSTD2/PLK2/RTN4RL1/LGALS1/PLXNB3/EFNA1/SEMA3F/ID1/ITGA3/TBC1D30/FGF13/NRP1/SEMA5A/MAG/ARHGAP4/FSTL4/ULK2/CERS2/RAP1GAP/PRKCD/PPP3CA/MYLIP/KIAA0319/CIB1/PMP22/VIM/NGFR/PLXNA3/CDK10/STX1B/RNF6/TRPC6/TRPV4/ADCY6/RTN4R/EFNB2/INPP5J/GAK	38
BP	GO:1901568	fatty acid derivative metabolic process	35|2653	137|14725	0.0170622	0.1816	ENSG00000161905/ENSG00000138061/ENSG00000151632/ENSG00000074416/ENSG00000196139/ENSG00000078401/ENSG00000106853/ENSG00000095303/ENSG00000168907/ENSG00000167741/ENSG00000148344/ENSG00000140465/ENSG00000117480/ENSG00000100078/ENSG00000127129/ENSG00000196407/ENSG00000067182/ENSG00000171954/ENSG00000162889/ENSG00000111058/ENSG00000137462/ENSG00000100075/ENSG00000081760/ENSG00000169710/ENSG00000165591…	ALOX15/CYP1B1/AKR1C2/MGLL/AKR1C3/EDN1/PTGR1/PTGS1/PLA2G4F/GGT6/PTGES/CYP1A1/FAAH/PLA2G3/EDN2/THEM5/TNFRSF1A/CYP4F22/MAPKAPK2/ACSS3/TLR2/SLC25A1/AACS/FASN/FAAH2/CYP2A6/PTGES2/PLA2G4C/CYP4F8/ACSF3/ACOX1/HMGCS2/MAPK3/GPX4/SLC27A5	35
BP	GO:0071559	response to transforming growth factor beta	51|2653	213|14725	0.0171106	0.181772	ENSG00000137801/ENSG00000130513/ENSG00000163347/ENSG00000095739/ENSG00000124225/ENSG00000168542/ENSG00000186174/ENSG00000125968/ENSG00000242265/ENSG00000005884/ENSG00000078401/ENSG00000102981/ENSG00000168743/ENSG00000170345/ENSG00000092969/ENSG00000260428/ENSG00000162552/ENSG00000176887/ENSG00000155090/ENSG00000143375/ENSG00000171236/ENSG00000140836/ENSG00000152518/ENSG00000115109/ENSG00000105974…	THBS1/GDF15/CLDN1/BAMBI/PMEPA1/COL3A1/BCL9L/ID1/PEG10/ITGA3/EDN1/PARD6A/NPNT/FOS/TGFB2/SCX/WNT4/SOX11/KLF10/CGN/LRG1/ZFHX3/ZFP36L2/EPB41L5/CAV1/ZFP36L1/PXN/F11R/TGFB3/FOLR1/LDLRAD4/WWOX/ITGB5/SMAD3/PTPRK/CITED2/VASN/GIPC1/WFIKKN1/CDKN2B/FURIN/UBC/TRIM33/ZYX/SMAD6/GLG1/SMAD7/ONECUT1/CAV2/SMURF1/CDH5	51
BP	GO:0045089	positive regulation of innate immune response	67|2653	291|14725	0.0171537	0.181887	ENSG00000091831/ENSG00000189334/ENSG00000095261/ENSG00000172936/ENSG00000115267/ENSG00000117983/ENSG00000263528/ENSG00000163220/ENSG00000138496/ENSG00000172551/ENSG00000163636/ENSG00000100906/ENSG00000125999/ENSG00000051523/ENSG00000161031/ENSG00000172243/ENSG00000164430/ENSG00000255690/ENSG00000185499/ENSG00000132256/ENSG00000104856/ENSG00000143546/ENSG00000205220/ENSG00000169894/ENSG00000105974…	ESR1/S100A14/PSMD5/MYD88/IFIH1/MUC5B/IKBKE/S100A9/PARP9/MUCL1/PSMD6/NFKBIA/BPIFB1/CYBA/PGLYRP2/CLEC7A/CGAS/TRIL/MUC1/TRIM5/RELB/S100A8/PSMB10/MUC3A/CAV1/PRKCD/NECTIN2/FFAR2/ITGAM/MAPKAPK2/CARD9/TMEM173/TLR2/BIRC3/HCK/TICAM1/RFTN1/CNPY3/UNC93B1/PSME1/PSMA7/TNIP2/IRF1/RSAD2/PSMC5/RASGRP1/NR1D1/UBC/IKBKG/PSME2/ADAM8/IRF3/DAB2IP/LAMP1/INAVA/PSMD4/HRAS/PGLYRP4/NOP53/DHX58/PYCARD/MAP3K1/RIPK2/UBE2V1/VA…	67
BP	GO:0002526	acute inflammatory response	30|2653	114|14725	0.0173297	0.183408	ENSG00000107485/ENSG00000176046/ENSG00000090339/ENSG00000143502/ENSG00000050628/ENSG00000134830/ENSG00000125730/ENSG00000010704/ENSG00000188372/ENSG00000148344/ENSG00000086062/ENSG00000143546/ENSG00000120885/ENSG00000241635/ENSG00000126353/ENSG00000126262/ENSG00000172216/ENSG00000145623/ENSG00000185187/ENSG00000106327/ENSG00000115414/ENSG00000130707/ENSG00000213918/ENSG00000164129/ENSG00000178585…	GATA3/NUPR1/ICAM1/SUSD4/PTGER3/C5AR2/C3/HFE/ZP3/PTGES/B4GALT1/S100A8/CLU/UGT1A1/CCR7/FFAR2/CEBPB/OSMR/SIGIRR/TFR2/FN1/ASS1/DNASE1/NPY5R/CTNNBIP1/F12/SERPINA3/SERPING1/ADAM8/IL1RN	30
BP	GO:0044344	cellular response to fibroblast growth factor stimulus	33|2653	128|14725	0.0176414	0.186358	ENSG00000137801/ENSG00000103067/ENSG00000104413/ENSG00000107485/ENSG00000026508/ENSG00000124813/ENSG00000196562/ENSG00000128016/ENSG00000115339/ENSG00000179388/ENSG00000011201/ENSG00000162552/ENSG00000152518/ENSG00000177706/ENSG00000185650/ENSG00000169429/ENSG00000108691/ENSG00000070388/ENSG00000127418/ENSG00000134962/ENSG00000156427/ENSG00000150991/ENSG00000128917/ENSG00000177885/ENSG00000105287…	THBS1/ESRP2/ESRP1/GATA3/CD44/RUNX2/SULF2/ZFP36/GALNT3/EGR3/ANOS1/WNT4/ZFP36L2/FAM20C/ZFP36L1/CXCL8/CCL2/FGF22/FGFRL1/KLB/FGF18/UBC/DLL4/GRB2/PRKD2/KDM5B/NPTN/FGF12/MAPK3/POLR2J/NR4A1/SPRED2/POLR2G	33
BP	GO:0010874	regulation of cholesterol efflux	8|2653	20|14725	0.017734	0.186693	ENSG00000164690/ENSG00000160179/ENSG00000144452/ENSG00000100906/ENSG00000131408/ENSG00000165029/ENSG00000149357/ENSG00000138798	SHH/ABCG1/ABCA12/NFKBIA/NR1H2/ABCA1/LAMTOR1/EGF	8
BP	GO:0018108	peptidyl-tyrosine phosphorylation	75|2653	331|14725	0.0177417	0.186693	ENSG00000065361/ENSG00000013588/ENSG00000100311/ENSG00000111679/ENSG00000178078/ENSG00000184557/ENSG00000175920/ENSG00000026508/ENSG00000101213/ENSG00000163235/ENSG00000090339/ENSG00000169242/ENSG00000138496/ENSG00000113494/ENSG00000173193/ENSG00000178568/ENSG00000165731/ENSG00000115380/ENSG00000175505/ENSG00000099250/ENSG00000146904/ENSG00000125508/ENSG00000185338/ENSG00000131370/ENSG00000186891…	ERBB3/GPRC5A/PDGFB/PTPN6/STAP2/SOCS3/DOK7/CD44/PTK6/TGFA/ICAM1/EFNA1/PARP9/PRLR/PARP14/ERBB4/RET/EFEMP1/CLCF1/NRP1/EPHA1/SRMS/SOCS1/SH3BP5/TNFRSF18/EPHB3/PDGFA/STAT5A/BANK1/CAV1/PRKCD/DMTN/TNFRSF1A/IL20/PRAG1/AREG/CRLF1/MVP/EPHA10/ADRA2B/ZFYVE28/CUX1/MST1R/IL24/HCK/EPHA2/TTBK1/IGF1R/FGF22/EPHB4/TESK1/IFNL1/CBLC/AFAP1L2/MAP3K11/VEGFA/LIF/HES1/FGF18/ZMYM2/ADRA2C/EGF/GRB2/ZGPAT/SHC1/IL11/PTPN1/TNK2/…	75
BP	GO:0090092	regulation of transmembrane receptor protein serine/threonine kinase signaling pathway	48|2653	199|14725	0.0177724	0.186693	ENSG00000137801/ENSG00000107984/ENSG00000130513/ENSG00000163083/ENSG00000164690/ENSG00000095739/ENSG00000124225/ENSG00000186174/ENSG00000242265/ENSG00000005884/ENSG00000168743/ENSG00000092969/ENSG00000141232/ENSG00000101144/ENSG00000010704/ENSG00000176887/ENSG00000157110/ENSG00000171236/ENSG00000123999/ENSG00000070404/ENSG00000105974/ENSG00000120149/ENSG00000119699/ENSG00000110195/ENSG00000168675…	THBS1/DKK1/GDF15/INHBB/SHH/BAMBI/PMEPA1/BCL9L/PEG10/ITGA3/NPNT/TGFB2/TOB1/BMP7/HFE/SOX11/RBPMS/LRG1/INHA/FSTL3/CAV1/MSX2/TGFB3/FOLR1/LDLRAD4/NOV/SMAD3/CITED2/VASN/CHRD/GIPC1/NUMA1/WFIKKN1/NOTCH1/CDKN2B/HES1/UBC/TRIM33/SMAD6/INHBA/GLG1/FBXL15/SMAD7/ONECUT1/CAV2/ZC3H3/SMURF1/FKBP8	48
BP	GO:0014013	regulation of gliogenesis	26|2653	96|14725	0.01784	0.187055	ENSG00000166145/ENSG00000164690/ENSG00000170075/ENSG00000183734/ENSG00000175505/ENSG00000149256/ENSG00000176887/ENSG00000105695/ENSG00000182054/ENSG00000143418/ENSG00000121966/ENSG00000244405/ENSG00000130164/ENSG00000118513/ENSG00000134323/ENSG00000137462/ENSG00000166780/ENSG00000071127/ENSG00000146216/ENSG00000027075/ENSG00000146072/ENSG00000148400/ENSG00000128342/ENSG00000114315/ENSG00000173402…	SPINT1/SHH/GPR37L1/ASCL2/CLCF1/TENM4/SOX11/MAG/IDH2/CERS2/CXCR4/ETV5/LDLR/MYB/MYCN/TLR2/C16orf45/WDR1/TTBK1/PRKCH/TNFRSF21/NOTCH1/LIF/HES1/DAG1/NTRK3	26
BP	GO:0001933	negative regulation of protein phosphorylation	87|2653	391|14725	0.0179574	0.187936	ENSG00000107984/ENSG00000124126/ENSG00000013588/ENSG00000146674/ENSG00000175793/ENSG00000111679/ENSG00000184557/ENSG00000185924/ENSG00000140832/ENSG00000167653/ENSG00000101213/ENSG00000124225/ENSG00000138835/ENSG00000169242/ENSG00000106211/ENSG00000173193/ENSG00000109062/ENSG00000124762/ENSG00000158050/ENSG00000168398/ENSG00000102981/ENSG00000120875/ENSG00000136826/ENSG00000146904/ENSG00000187678…	DKK1/PREX1/GPRC5A/IGFBP3/SFN/PTPN6/SOCS3/RTN4RL1/MARVELD3/PSCA/PTK6/PMEPA1/RGS3/EFNA1/HSPB1/PARP14/SLC9A3R1/CDKN1A/DUSP2/BDKRB2/PARD6A/DUSP4/KLF4/EPHA1/SPRY4/GADD45B/PKIB/BMP7/GPER1/SOCS1/CAMK2N2/SH3BP5/ZC3H12A/PRKAR1B/LATS2/PODNL1/LRRC15/LRRTM3/CAV1/PRKCD/DMTN/CAMK2N1/AKT1/CISH/TRIB3/PTPRJ/MVP/DDIT4/LDLRAD4/ZFYVE28/CIB1/CDKN1B/ZMYND11/PID1/CTDSP1/IGF1R/DEPTOR/AMBP/NR2F2/LRP5/TESK1/TAOK3/CBLC/CDK…	87
BP	GO:0030073	insulin secretion	44|2653	180|14725	0.0180071	0.188108	ENSG00000128564/ENSG00000163083/ENSG00000119714/ENSG00000183044/ENSG00000011347/ENSG00000169047/ENSG00000170745/ENSG00000173175/ENSG00000130529/ENSG00000164850/ENSG00000072310/ENSG00000110090/ENSG00000003147/ENSG00000117394/ENSG00000096433/ENSG00000183844/ENSG00000138814/ENSG00000120451/ENSG00000087460/ENSG00000155093/ENSG00000136999/ENSG00000196126/ENSG00000106089/ENSG00000169100/ENSG00000132639…	VGF/INHBB/GPR68/ABAT/SYT7/IRS1/KCNS3/ADCY5/TRPM4/GPER1/SREBF1/CPT1A/ICA1/SLC2A1/ITPR3/FAM3B/PPP3CA/SNX19/GNAS/PTPRN2/NOV/HLA-DRB1/STX1A/SLC25A6/SNAP25/PFKL/MAFA/LRP5/MIDN/AACS/PIM3/ITPR1/PHPT1/NR1D1/CPLX1/ADRA2C/ARRB1/MYO5A/SSTR5/KCNJ11/IL1RN/MYRIP/CACNA1D/PER2	44
BP	GO:1903901	negative regulation of viral life cycle	19|2653	65|14725	0.0180784	0.188503	ENSG00000142089/ENSG00000187608/ENSG00000157601/ENSG00000111331/ENSG00000166801/ENSG00000135114/ENSG00000130303/ENSG00000178685/ENSG00000148180/ENSG00000163874/ENSG00000089127/ENSG00000132256/ENSG00000172183/ENSG00000185201/ENSG00000130813/ENSG00000121060/ENSG00000185885/ENSG00000171206/ENSG00000134321	IFITM3/ISG15/MX1/OAS3/FAM111A/OASL/BST2/PARP10/GSN/ZC3H12A/OAS1/TRIM5/ISG20/IFITM2/C19orf66/TRIM25/IFITM1/TRIM8/RSAD2	19
BP	GO:0071774	response to fibroblast growth factor	34|2653	133|14725	0.0183408	0.188933	ENSG00000137801/ENSG00000103067/ENSG00000104413/ENSG00000107485/ENSG00000026508/ENSG00000124813/ENSG00000196562/ENSG00000128016/ENSG00000115339/ENSG00000179388/ENSG00000011201/ENSG00000162552/ENSG00000152518/ENSG00000177706/ENSG00000185650/ENSG00000169429/ENSG00000108691/ENSG00000160888/ENSG00000070388/ENSG00000127418/ENSG00000134962/ENSG00000156427/ENSG00000150991/ENSG00000128917/ENSG00000177885…	THBS1/ESRP2/ESRP1/GATA3/CD44/RUNX2/SULF2/ZFP36/GALNT3/EGR3/ANOS1/WNT4/ZFP36L2/FAM20C/ZFP36L1/CXCL8/CCL2/IER2/FGF22/FGFRL1/KLB/FGF18/UBC/DLL4/GRB2/PRKD2/KDM5B/NPTN/FGF12/MAPK3/POLR2J/NR4A1/SPRED2/POLR2G	34
BP	GO:0071560	cellular response to transforming growth factor beta stimulus	50|2653	209|14725	0.0183643	0.188933	ENSG00000137801/ENSG00000130513/ENSG00000163347/ENSG00000095739/ENSG00000124225/ENSG00000168542/ENSG00000186174/ENSG00000125968/ENSG00000242265/ENSG00000005884/ENSG00000078401/ENSG00000102981/ENSG00000168743/ENSG00000170345/ENSG00000092969/ENSG00000260428/ENSG00000162552/ENSG00000176887/ENSG00000155090/ENSG00000143375/ENSG00000171236/ENSG00000152518/ENSG00000115109/ENSG00000105974/ENSG00000185650…	THBS1/GDF15/CLDN1/BAMBI/PMEPA1/COL3A1/BCL9L/ID1/PEG10/ITGA3/EDN1/PARD6A/NPNT/FOS/TGFB2/SCX/WNT4/SOX11/KLF10/CGN/LRG1/ZFP36L2/EPB41L5/CAV1/ZFP36L1/PXN/F11R/TGFB3/FOLR1/LDLRAD4/WWOX/ITGB5/SMAD3/PTPRK/CITED2/VASN/GIPC1/WFIKKN1/CDKN2B/FURIN/UBC/TRIM33/ZYX/SMAD6/GLG1/SMAD7/ONECUT1/CAV2/SMURF1/CDH5	50
BP	GO:0010839	negative regulation of keratinocyte proliferation	6|2653	13|14725	0.0183748	0.188933	ENSG00000175793/ENSG00000175707/ENSG00000111424/ENSG00000126233/ENSG00000152894/ENSG00000125266	SFN/KDF1/VDR/SLURP1/PTPRK/EFNB2	6
BP	GO:0033630	positive regulation of cell adhesion mediated by integrin	6|2653	13|14725	0.0183748	0.188933	ENSG00000111679/ENSG00000165731/ENSG00000092969/ENSG00000103335/ENSG00000128567/ENSG00000185043	PTPN6/RET/TGFB2/PIEZO1/PODXL/CIB1	6
BP	GO:0060712	spongiotrophoblast layer development	6|2653	13|14725	0.0183748	0.188933	ENSG00000184557/ENSG00000183734/ENSG00000123572/ENSG00000185650/ENSG00000142208/ENSG00000128342	SOCS3/ASCL2/NRK/ZFP36L1/AKT1/LIF	6
BP	GO:0061029	eyelid development in camera-type eye	6|2653	13|14725	0.0183748	0.188933	ENSG00000158055/ENSG00000176887/ENSG00000164920/ENSG00000137868/ENSG00000137203/ENSG00000122641	GRHL3/SOX11/OSR2/STRA6/TFAP2A/INHBA	6
BP	GO:0072488	ammonium transmembrane transport	6|2653	13|14725	0.0183748	0.188933	ENSG00000132677/ENSG00000140519/ENSG00000197119/ENSG00000197208/ENSG00000064651/ENSG00000197375	RHBG/RHCG/SLC25A29/SLC22A4/SLC12A2/SLC22A5	6
BP	GO:0006584	catecholamine metabolic process	15|2653	48|14725	0.0184211	0.188933	ENSG00000107485/ENSG00000170775/ENSG00000116016/ENSG00000183044/ENSG00000184845/ENSG00000092969/ENSG00000180176/ENSG00000153234/ENSG00000169896/ENSG00000127838/ENSG00000093010/ENSG00000196502/ENSG00000197165/ENSG00000164197/ENSG00000131979	GATA3/GPR37/EPAS1/ABAT/DRD1/TGFB2/TH/NR4A2/ITGAM/PNKD/COMT/SULT1A1/SULT1A2/RNF180/GCH1	15
BP	GO:0009712	catechol-containing compound metabolic process	15|2653	48|14725	0.0184211	0.188933	ENSG00000107485/ENSG00000170775/ENSG00000116016/ENSG00000183044/ENSG00000184845/ENSG00000092969/ENSG00000180176/ENSG00000153234/ENSG00000169896/ENSG00000127838/ENSG00000093010/ENSG00000196502/ENSG00000197165/ENSG00000164197/ENSG00000131979	GATA3/GPR37/EPAS1/ABAT/DRD1/TGFB2/TH/NR4A2/ITGAM/PNKD/COMT/SULT1A1/SULT1A2/RNF180/GCH1	15
BP	GO:0001654	eye development	71|2653	312|14725	0.0187681	0.192144	ENSG00000107485/ENSG00000188064/ENSG00000158055/ENSG00000164690/ENSG00000138061/ENSG00000121068/ENSG00000146950/ENSG00000171587/ENSG00000165731/ENSG00000131669/ENSG00000115380/ENSG00000087085/ENSG00000136826/ENSG00000092969/ENSG00000099250/ENSG00000184564/ENSG00000131759/ENSG00000182704/ENSG00000160111/ENSG00000101144/ENSG00000186350/ENSG00000176887/ENSG00000083307/ENSG00000163349/ENSG00000140465…	GATA3/WNT7B/GRHL3/SHH/CYP1B1/TBX2/SHROOM2/DSCAM/RET/NINJ1/EFEMP1/ACHE/KLF4/TGFB2/NRP1/SLITRK6/RARA/TSKU/CPAMD8/BMP7/RXRA/SOX11/GRHL2/HIPK1/CYP1A1/RARG/TH/OSR2/PPP1R13L/DIO3/FREM2/TULP1/ALDH1A3/BCAR3/STRA6/FSCN2/TFAP2A/CDKN1B/NECTIN1/IRX5/SLC25A25/JAG1/EPHA2/VIM/SMAD3/BCL11B/CITED2/LAMB2/LRP5/ARHGAP35/HSF4/SIPA1L3/WNT9A/VEGFA/CST3/NES/EGF/C12orf57/DLL4/INHBA/KDM5B/ROM1/GNAT1/RAB18/CLCN2/PFDN5/IFT1…	71
BP	GO:0006665	sphingolipid metabolic process	38|2653	152|14725	0.0188258	0.192384	ENSG00000196542/ENSG00000006756/ENSG00000132746/ENSG00000103089/ENSG00000141934/ENSG00000168350/ENSG00000169255/ENSG00000148488/ENSG00000006534/ENSG00000128274/ENSG00000144455/ENSG00000180176/ENSG00000177076/ENSG00000141337/ENSG00000158220/ENSG00000133424/ENSG00000064601/ENSG00000143418/ENSG00000113532/ENSG00000163932/ENSG00000067182/ENSG00000103056/ENSG00000124164/ENSG00000165389/ENSG00000136478…	SPTSSB/ARSD/ALDH3B2/FA2H/PLPP2/DEGS2/B3GALNT1/ST8SIA6/ALDH3B1/A4GALT/SUMF1/TH/ACER2/ARSG/ESYT3/LARGE1/CTSA/CERS2/ST8SIA4/PRKCD/TNFRSF1A/SMPD3/VAPB/SPTSSA/TEX2/SERINC5/SPTLC3/ORMDL2/UGCG/PRKD2/PLA2G15/ASAH1/SPNS2/ESYT1/PSAP/ST3GAL5/CPTP/GLB1	38
BP	GO:0042326	negative regulation of phosphorylation	94|2653	427|14725	0.0189069	0.192864	ENSG00000165140/ENSG00000107984/ENSG00000124126/ENSG00000013588/ENSG00000129993/ENSG00000146674/ENSG00000175793/ENSG00000111679/ENSG00000184557/ENSG00000185924/ENSG00000140832/ENSG00000167653/ENSG00000101213/ENSG00000124225/ENSG00000138835/ENSG00000169242/ENSG00000106211/ENSG00000173193/ENSG00000109062/ENSG00000124762/ENSG00000158050/ENSG00000168398/ENSG00000102981/ENSG00000120875/ENSG00000136826…	FBP1/DKK1/PREX1/GPRC5A/CBFA2T3/IGFBP3/SFN/PTPN6/SOCS3/RTN4RL1/MARVELD3/PSCA/PTK6/PMEPA1/RGS3/EFNA1/HSPB1/PARP14/SLC9A3R1/CDKN1A/DUSP2/BDKRB2/PARD6A/DUSP4/KLF4/EPHA1/SPRY4/GADD45B/PKIB/BMP7/GPER1/SOCS1/CAMK2N2/SH3BP5/ZC3H12A/PRKAR1B/LATS2/PODNL1/INHA/LRRC15/LRRTM3/CAV1/PRKCD/DMTN/CAMK2N1/AKT1/CISH/TRIB3/PTPRJ/MVP/DDIT4/LDLRAD4/ZFYVE28/CIB1/CDKN1B/ZMYND11/PID1/CTDSP1/IGF1R/DEPTOR/AMBP/NR2F2/LRP5/MI…	94
BP	GO:0031529	ruffle organization	14|2653	44|14725	0.0190811	0.193089	ENSG00000184292/ENSG00000177106/ENSG00000090339/ENSG00000131037/ENSG00000105974/ENSG00000126353/ENSG00000172725/ENSG00000106078/ENSG00000140416/ENSG00000132613/ENSG00000035115/ENSG00000140995/ENSG00000273749/ENSG00000174775	TACSTD2/EPS8L2/ICAM1/EPS8L1/CAV1/CCR7/CORO1B/COBL/TPM1/MTSS1L/SH3YL1/DEF8/CYFIP1/HRAS	14
BP	GO:0032091	negative regulation of protein binding	25|2653	92|14725	0.0191087	0.193089	ENSG00000107984/ENSG00000100311/ENSG00000125968/ENSG00000010704/ENSG00000179588/ENSG00000115109/ENSG00000105974/ENSG00000163932/ENSG00000142208/ENSG00000119922/ENSG00000121101/ENSG00000104964/ENSG00000143537/ENSG00000146216/ENSG00000127578/ENSG00000172531/ENSG00000075624/ENSG00000178585/ENSG00000167110/ENSG00000132688/ENSG00000139644/ENSG00000142949/ENSG00000135924/ENSG00000101331/ENSG00000102882	DKK1/PDGFB/ID1/HFE/ZFPM1/EPB41L5/CAV1/PRKCD/AKT1/IFIT2/TEX14/AES/ADAM15/TTBK1/WFIKKN1/PPP1CA/ACTB/CTNNBIP1/GOLGA2/NES/TMBIM6/PTPRF/DNAJB2/CCM2L/MAPK3	25
BP	GO:0051928	positive regulation of calcium ion transport	25|2653	92|14725	0.0191087	0.193089	ENSG00000100311/ENSG00000131981/ENSG00000064270/ENSG00000176884/ENSG00000159167/ENSG00000107562/ENSG00000160211/ENSG00000184845/ENSG00000101188/ENSG00000164850/ENSG00000187848/ENSG00000122679/ENSG00000090020/ENSG00000143153/ENSG00000105974/ENSG00000108691/ENSG00000103888/ENSG00000135124/ENSG00000109501/ENSG00000124181/ENSG00000137672/ENSG00000157388/ENSG00000100739/ENSG00000167723/ENSG00000198668	PDGFB/LGALS3/ATP2C2/GRIN1/STC1/CXCL12/G6PD/DRD1/NTSR1/GPER1/P2RX2/RAMP3/SLC9A1/ATP1B1/CAV1/CCL2/CEMIP/P2RX4/WFS1/PLCG1/TRPC6/CACNA1D/BDKRB1/TRPV3/CALM1	25
BP	GO:0048864	stem cell development	18|2653	61|14725	0.019112	0.193089	ENSG00000164690/ENSG00000001617/ENSG00000178568/ENSG00000165731/ENSG00000078401/ENSG00000075223/ENSG00000099250/ENSG00000101144/ENSG00000176887/ENSG00000130702/ENSG00000110195/ENSG00000101384/ENSG00000125850/ENSG00000164442/ENSG00000249915/ENSG00000172757/ENSG00000114315/ENSG00000102882	SHH/SEMA3F/ERBB4/RET/EDN1/SEMA3C/NRP1/BMP7/SOX11/LAMA5/FOLR1/JAG1/OVOL2/CITED2/PDCD6/CFL1/HES1/MAPK3	18
BP	GO:0032401	establishment of melanosome localization	9|2653	24|14725	0.0191685	0.193089	ENSG00000115648/ENSG00000062038/ENSG00000146950/ENSG00000124839/ENSG00000041353/ENSG00000101850/ENSG00000118242/ENSG00000197535/ENSG00000189114	MLPH/CDH3/SHROOM2/RAB17/RAB27B/GPR143/MREG/MYO5A/BLOC1S3	9
BP	GO:0060740	prostate gland epithelium morphogenesis	9|2653	24|14725	0.0191685	0.193089	ENSG00000091831/ENSG00000129514/ENSG00000164690/ENSG00000101144/ENSG00000186350/ENSG00000073282/ENSG00000169083/ENSG00000172819/ENSG00000148400	ESR1/FOXA1/SHH/BMP7/RXRA/TP63/AR/RARG/NOTCH1	9
BP	GO:0090279	regulation of calcium ion import	9|2653	24|14725	0.0191685	0.193089	ENSG00000100311/ENSG00000131981/ENSG00000064270/ENSG00000159167/ENSG00000107562/ENSG00000122679/ENSG00000108691/ENSG00000138798/ENSG00000167723	PDGFB/LGALS3/ATP2C2/STC1/CXCL12/RAMP3/CCL2/EGF/TRPV3	9
BP	GO:1903037	regulation of leukocyte cell-cell adhesion	54|2653	229|14725	0.019366	0.19473	ENSG00000107485/ENSG00000131981/ENSG00000111679/ENSG00000164690/ENSG00000100097/ENSG00000026508/ENSG00000107562/ENSG00000090339/ENSG00000179388/ENSG00000100219/ENSG00000124145/ENSG00000136826/ENSG00000131759/ENSG00000115457/ENSG00000160685/ENSG00000010704/ENSG00000188372/ENSG00000113916/ENSG00000185338/ENSG00000102879/ENSG00000134258/ENSG00000145675/ENSG00000107099/ENSG00000198502/ENSG00000107968…	GATA3/LGALS3/PTPN6/SHH/LGALS1/CD44/CXCL12/ICAM1/EGR3/XBP1/SDC4/KLF4/RARA/IGFBP2/ZBTB7B/HFE/ZP3/BCL6/SOCS1/CORO1A/VTCN1/PIK3R1/DOCK8/HLA-DRB5/MAP3K8/CAV1/CCR7/ZMIZ1/AKT1/CEBPB/CCL2/MYB/ASS1/CCL28/HLA-DRB1/GPNMB/CD47/IFNL1/TNFRSF21/IRF1/RASGRP1/HES1/MAP3K14/CD276/ADAM8/GRB2/EFNB2/SMAD7/PYCARD/CD5/RIPK2/ERBB2/VAV1/NPHS1	54
BP	GO:0006909	phagocytosis	48|2653	200|14725	0.0194073	0.194798	ENSG00000137801/ENSG00000092929/ENSG00000161905/ENSG00000138772/ENSG00000011347/ENSG00000102890/ENSG00000125730/ENSG00000131759/ENSG00000051523/ENSG00000139832/ENSG00000102879/ENSG00000172243/ENSG00000148180/ENSG00000145675/ENSG00000018280/ENSG00000112041/ENSG00000163932/ENSG00000169896/ENSG00000130429/ENSG00000108691/ENSG00000100345/ENSG00000015285/ENSG00000165029/ENSG00000137462/ENSG00000160293…	THBS1/UNC13D/ALOX15/ANXA3/SYT7/ELMO3/C3/RARA/CYBA/RAB20/CORO1A/CLEC7A/GSN/PIK3R1/SLC11A1/TULP1/PRKCD/ITGAM/ARPC1B/CCL2/MYH9/WAS/ABCA1/TLR2/VAV2/HCK/ARPC4/ABR/CNN2/CD47/DOCK2/CDC42SE1/MYO1C/ACTB/PLCG1/BRK1/LIMK1/GRB2/CYFIP1/TGM2/VAV3/ANXA11/SCARB1/ADGRB1/PYCARD/MAPK3/VAV1/WASL	48
BP	GO:0090287	regulation of cellular response to growth factor stimulus	55|2653	234|14725	0.0195813	0.196195	ENSG00000137801/ENSG00000138119/ENSG00000107485/ENSG00000107984/ENSG00000095739/ENSG00000124225/ENSG00000124813/ENSG00000196562/ENSG00000186174/ENSG00000242265/ENSG00000005884/ENSG00000168743/ENSG00000141232/ENSG00000162552/ENSG00000176887/ENSG00000171236/ENSG00000136830/ENSG00000070404/ENSG00000177706/ENSG00000105974/ENSG00000135404/ENSG00000120149/ENSG00000119699/ENSG00000110195/ENSG00000168675…	THBS1/MYOF/GATA3/DKK1/BAMBI/PMEPA1/RUNX2/SULF2/BCL9L/PEG10/ITGA3/NPNT/TOB1/WNT4/SOX11/LRG1/FAM129B/FSTL3/FAM20C/CAV1/CD63/MSX2/TGFB3/FOLR1/LDLRAD4/SMAD3/CITED2/VASN/CHRD/GIPC1/NUMA1/WFIKKN1/NOTCH1/MYO1C/CDKN2B/PDCD6/VEGFA/HES1/FGF18/UBC/TRIM33/DAB2IP/PRKD2/CYFIP1/SMAD6/NPTN/PTPN1/GLG1/FBXL15/SMAD7/ONECUT1/CAV2/SMURF1/FKBP8/VEGFC	55
BP	GO:0042771	intrinsic apoptotic signaling pathway in response to DNA damage by p53 class mediator	13|2653	40|14725	0.0196266	0.196301	ENSG00000176046/ENSG00000069399/ENSG00000026508/ENSG00000124762/ENSG00000174307/ENSG00000161642/ENSG00000073282/ENSG00000163349/ENSG00000185499/ENSG00000168209/ENSG00000164054/ENSG00000128886/ENSG00000103490	NUPR1/BCL3/CD44/CDKN1A/PHLDA3/ZNF385A/TP63/HIPK1/MUC1/DDIT4/SHISA5/ELL3/PYCARD	13
BP	GO:0008360	regulation of cell shape	33|2653	129|14725	0.019719	0.196875	ENSG00000198753/ENSG00000095739/ENSG00000090339/ENSG00000127084/ENSG00000109062/ENSG00000164050/ENSG00000196576/ENSG00000118680/ENSG00000196189/ENSG00000102879/ENSG00000138771/ENSG00000004399/ENSG00000158856/ENSG00000105707/ENSG00000140416/ENSG00000160226/ENSG00000108691/ENSG00000100345/ENSG00000115414/ENSG00000105357/ENSG00000071127/ENSG00000101336/ENSG00000146216/ENSG00000162458/ENSG00000197622…	PLXNB3/BAMBI/ICAM1/FGD3/SLC9A3R1/PLXNB1/PLXNB2/MYL12B/SEMA4A/CORO1A/SHROOM3/PLXND1/DMTN/HPN/TPM1/C21orf2/CCL2/MYH9/FN1/MYH14/WDR1/HCK/TTBK1/FBLIM1/CDC42SE1/ARHGAP35/VEGFA/VIL1/CYFIP1/DAG1/FGD4/FMNL1/FES	33
BP	GO:0010001	glial cell differentiation	44|2653	181|14725	0.0197538	0.196875	ENSG00000065361/ENSG00000166145/ENSG00000164690/ENSG00000103089/ENSG00000163220/ENSG00000176720/ENSG00000010278/ENSG00000170075/ENSG00000103260/ENSG00000184845/ENSG00000175505/ENSG00000149256/ENSG00000139352/ENSG00000176887/ENSG00000105695/ENSG00000148180/ENSG00000112414/ENSG00000169247/ENSG00000143546/ENSG00000120885/ENSG00000121966/ENSG00000142208/ENSG00000187957/ENSG00000130164/ENSG00000134323…	ERBB3/SPINT1/SHH/FA2H/S100A9/BOK/CD9/GPR37L1/METRN/DRD1/CLCF1/TENM4/ASCL1/SOX11/MAG/GSN/ADGRG6/SH3TC2/S100A8/CLU/CXCR4/AKT1/DNER/LDLR/MYCN/TLR2/WDR1/NAB2/VIM/TTBK1/GPR157/LAMB2/TNFRSF21/NOTCH1/HDAC11/LIF/HES1/HDAC10/DAG1/AKT2/MAPK3/EIF2B5/ERBB2/NTRK3	44
BP	GO:0090207	regulation of triglyceride metabolic process	10|2653	28|14725	0.0198992	0.19725	ENSG00000125730/ENSG00000214456/ENSG00000072310/ENSG00000130164/ENSG00000131408/ENSG00000142178/ENSG00000197296/ENSG00000073060/ENSG00000103227/ENSG00000151365	C3/PLIN5/SREBF1/LDLR/NR1H2/SIK1/FITM2/SCARB1/LMF1/THRSP	10
BP	GO:0036498	IRE1-mediated unfolded protein response	20|2653	70|14725	0.0199615	0.19725	ENSG00000106541/ENSG00000100219/ENSG00000160789/ENSG00000198855/ENSG00000105327/ENSG00000198356/ENSG00000070540/ENSG00000159720/ENSG00000109501/ENSG00000044090/ENSG00000139644/ENSG00000136848/ENSG00000160691/ENSG00000178607/ENSG00000196396/ENSG00000101199/ENSG00000116809/ENSG00000175215/ENSG00000072778/ENSG00000162298	AGR2/XBP1/LMNA/FICD/BBC3/ASNA1/WIPI1/ATP6V0D1/WFS1/CUL7/TMBIM6/DAB2IP/SHC1/ERN1/PTPN1/ARFGAP1/ZBTB17/CTDSP2/ACADVL/SYVN1	20
BP	GO:0043627	response to estrogen	20|2653	70|14725	0.0199615	0.19725	ENSG00000171345/ENSG00000091831/ENSG00000107485/ENSG00000141376/ENSG00000131759/ENSG00000115457/ENSG00000110092/ENSG00000105974/ENSG00000130429/ENSG00000170542/ENSG00000134202/ENSG00000179862/ENSG00000121060/ENSG00000119699/ENSG00000093010/ENSG00000057593/ENSG00000164442/ENSG00000164761/ENSG00000044115/ENSG00000137834	KRT19/ESR1/GATA3/BCAS3/RARA/IGFBP2/CCND1/CAV1/ARPC1B/SERPINB9/GSTM3/CITED4/TRIM25/TGFB3/COMT/F7/CITED2/TNFRSF11B/CTNNA1/SMAD6	20
BP	GO:0003179	heart valve morphogenesis	12|2653	36|14725	0.0200013	0.19725	ENSG00000107485/ENSG00000169242/ENSG00000092969/ENSG00000260428/ENSG00000179588/ENSG00000130558/ENSG00000157554/ENSG00000137868/ENSG00000101384/ENSG00000148400/ENSG00000127418/ENSG00000137834	GATA3/EFNA1/TGFB2/SCX/ZFPM1/OLFM1/ERG/STRA6/JAG1/NOTCH1/FGFRL1/SMAD6	12
BP	GO:0017001	antibiotic catabolic process	12|2653	36|14725	0.0200013	0.19725	ENSG00000132746/ENSG00000006534/ENSG00000196139/ENSG00000241635/ENSG00000115705/ENSG00000162066/ENSG00000124357/ENSG00000196502/ENSG00000102032/ENSG00000197165/ENSG00000198074/ENSG00000211445	ALDH3B2/ALDH3B1/AKR1C3/UGT1A1/TPO/AMDHD2/NAGK/SULT1A1/RENBP/SULT1A2/AKR1B10/GPX3	12
BP	GO:0045687	positive regulation of glial cell differentiation	12|2653	36|14725	0.0200013	0.19725	ENSG00000166145/ENSG00000164690/ENSG00000175505/ENSG00000149256/ENSG00000105695/ENSG00000121966/ENSG00000137462/ENSG00000146216/ENSG00000148400/ENSG00000128342/ENSG00000114315/ENSG00000173402	SPINT1/SHH/CLCF1/TENM4/MAG/CXCR4/TLR2/TTBK1/NOTCH1/LIF/HES1/DAG1	12
BP	GO:0032801	receptor catabolic process	11|2653	32|14725	0.0201277	0.197462	ENSG00000163840/ENSG00000182718/ENSG00000014216/ENSG00000007944/ENSG00000140564/ENSG00000161203/ENSG00000042753/ENSG00000147852/ENSG00000196396/ENSG00000141367/ENSG00000198742	DTX3L/ANXA2/CAPN1/MYLIP/FURIN/AP2M1/AP2S1/VLDLR/PTPN1/CLTC/SMURF1	11
BP	GO:0043276	anoikis	11|2653	32|14725	0.0201277	0.197462	ENSG00000104081/ENSG00000105974/ENSG00000142208/ENSG00000104964/ENSG00000105388/ENSG00000196781/ENSG00000142178/ENSG00000148400/ENSG00000035664/ENSG00000269335/ENSG00000141378	BMF/CAV1/AKT1/AES/CEACAM5/TLE1/SIK1/NOTCH1/DAPK2/IKBKG/PTRH2	11
BP	GO:0060416	response to growth hormone	11|2653	32|14725	0.0201277	0.197462	ENSG00000113494/ENSG00000115461/ENSG00000145675/ENSG00000126561/ENSG00000142208/ENSG00000089159/ENSG00000130707/ENSG00000057593/ENSG00000196396/ENSG00000102882/ENSG00000221926	PRLR/IGFBP5/PIK3R1/STAT5A/AKT1/PXN/ASS1/F7/PTPN1/MAPK3/TRIM16	11
BP	GO:0051249	regulation of lymphocyte activation	75|2653	333|14725	0.0202913	0.198225	ENSG00000107485/ENSG00000076242/ENSG00000131981/ENSG00000172936/ENSG00000111679/ENSG00000164690/ENSG00000100097/ENSG00000124762/ENSG00000101096/ENSG00000179388/ENSG00000100219/ENSG00000159216/ENSG00000124145/ENSG00000175505/ENSG00000131759/ENSG00000115457/ENSG00000170476/ENSG00000160685/ENSG00000010704/ENSG00000188372/ENSG00000176887/ENSG00000113916/ENSG00000185338/ENSG00000102879/ENSG00000134258…	GATA3/MLH1/LGALS3/MYD88/PTPN6/SHH/LGALS1/CDKN1A/NFATC2/EGR3/XBP1/RUNX1/SDC4/CLCF1/RARA/IGFBP2/MZB1/ZBTB7B/HFE/ZP3/SOX11/BCL6/SOCS1/CORO1A/VTCN1/PGLYRP2/TNFRSF18/GSN/PIK3R1/DOCK8/ZFP36L2/HLA-DRB5/BANK1/INHA/MAP3K8/CAV1/CCR7/ZFP36L1/ZMIZ1/AKT1/CEBPB/CCL2/MYB/TICAM1/SOX13/HLA-DRB1/GPNMB/CD47/IFNL1/TNFRSF21/TNIP2/IRF1/RASGRP1/FOXN1/HES1/MAP3K14/CD276/ADAM8/GRB2/IL27/LAMP1/INHBA/VAV3/CLPTM1/EFNB2/SMAD…	75
BP	GO:0032526	response to retinoic acid	26|2653	97|14725	0.020311	0.198225	ENSG00000188064/ENSG00000107984/ENSG00000101213/ENSG00000165272/ENSG00000165731/ENSG00000198797/ENSG00000136826/ENSG00000131759/ENSG00000115457/ENSG00000139352/ENSG00000072310/ENSG00000186350/ENSG00000148344/ENSG00000172819/ENSG00000177076/ENSG00000165474/ENSG00000188910/ENSG00000074219/ENSG00000171401/ENSG00000126903/ENSG00000118513/ENSG00000165029/ENSG00000143816/ENSG00000103811/ENSG00000140538…	WNT7B/DKK1/PTK6/AQP3/RET/BRINP2/KLF4/RARA/IGFBP2/ASCL1/SREBF1/RXRA/PTGES/RARG/ACER2/GJB2/GJB3/TEAD2/KRT13/SLC10A3/MYB/ABCA1/WNT9A/CTSH/NTRK3/TRIM16	26
BP	GO:0048593	camera-type eye morphogenesis	26|2653	97|14725	0.020311	0.198225	ENSG00000121068/ENSG00000146950/ENSG00000171587/ENSG00000182704/ENSG00000101144/ENSG00000176887/ENSG00000163349/ENSG00000180176/ENSG00000197406/ENSG00000184254/ENSG00000137936/ENSG00000137868/ENSG00000137203/ENSG00000110400/ENSG00000176842/ENSG00000101384/ENSG00000142627/ENSG00000164442/ENSG00000162337/ENSG00000143816/ENSG00000112715/ENSG00000138798/ENSG00000111678/ENSG00000149489/ENSG00000163913…	TBX2/SHROOM2/DSCAM/TSKU/BMP7/SOX11/HIPK1/TH/DIO3/ALDH1A3/BCAR3/STRA6/TFAP2A/NECTIN1/IRX5/JAG1/EPHA2/CITED2/LRP5/WNT9A/VEGFA/EGF/C12orf57/ROM1/IFT122/FZD5	26
BP	GO:0001503	ossification	78|2653	348|14725	0.0203635	0.198395	ENSG00000188064/ENSG00000107984/ENSG00000146674/ENSG00000170468/ENSG00000161905/ENSG00000164690/ENSG00000159167/ENSG00000187608/ENSG00000171223/ENSG00000124813/ENSG00000125968/ENSG00000164050/ENSG00000087085/ENSG00000159216/ENSG00000168743/ENSG00000171522/ENSG00000131650/ENSG00000092969/ENSG00000130529/ENSG00000141232/ENSG00000260428/ENSG00000180694/ENSG00000101144/ENSG00000162552/ENSG00000176887…	WNT7B/DKK1/IGFBP3/RIOX1/ALOX15/SHH/STC1/ISG15/JUNB/RUNX2/ID1/PLXNB1/ACHE/RUNX1/NPNT/PTGER4/KREMEN2/TGFB2/TRPM4/TOB1/SCX/TMEM64/BMP7/WNT4/SOX11/KLF10/TP63/IGFBP5/ATP6V0A4/OSR2/TUFT1/FSTL3/JUND/FAM20C/AKT1/CEBPB/AREG/MMP9/MGP/MSX2/GNAS/TGFB3/TFAP2A/IFITM1/WWOX/NAB2/CYP24A1/JAG1/EPHA2/SMAD3/MMP16/CHRD/SBNO2/GPNMB/LRP5/FASN/ESRRA/MMP13/NOTCH1/CTNNBIP1/KAZALD1/ATP6AP1/CDH11/ZHX3/FGF18/SORT1/SMAD6/SNAI…	78
BP	GO:0060485	mesenchyme development	53|2653	225|14725	0.0207666	0.201973	ENSG00000065361/ENSG00000129514/ENSG00000176788/ENSG00000164690/ENSG00000121068/ENSG00000095739/ENSG00000169242/ENSG00000001617/ENSG00000186174/ENSG00000178568/ENSG00000165731/ENSG00000163017/ENSG00000078401/ENSG00000075223/ENSG00000092969/ENSG00000099250/ENSG00000260428/ENSG00000101144/ENSG00000162552/ENSG00000176887/ENSG00000130702/ENSG00000130558/ENSG00000157554/ENSG00000115109/ENSG00000185650…	ERBB3/FOXA1/BASP1/SHH/TBX2/BAMBI/EFNA1/SEMA3F/BCL9L/ERBB4/RET/ACTG2/EDN1/SEMA3C/TGFB2/NRP1/SCX/BMP7/WNT4/SOX11/LAMA5/OLFM1/ERG/EPB41L5/ZFP36L1/TEAD2/HPN/MSX2/ADAM15/TGFB3/FOLR1/LDLRAD4/JAG1/SMAD3/OVOL2/CITED2/VASN/MESP1/NOTCH1/CUL7/PDCD6/CFL1/LOXL2/HES1/DAB2IP/EXOC4/DAG1/ELL3/SNAI1/SMAD7/MAPK3/S100A4/SDHAF2	53
BP	GO:0010721	negative regulation of cell development	63|2653	274|14725	0.0208691	0.202621	ENSG00000184292/ENSG00000205336/ENSG00000145632/ENSG00000164690/ENSG00000185924/ENSG00000100097/ENSG00000169242/ENSG00000168542/ENSG00000001617/ENSG00000125968/ENSG00000170075/ENSG00000134595/ENSG00000178568/ENSG00000160211/ENSG00000183734/ENSG00000129682/ENSG00000099250/ENSG00000112902/ENSG00000213694/ENSG00000101144/ENSG00000185737/ENSG00000139352/ENSG00000176887/ENSG00000105695/ENSG00000089820…	TACSTD2/ADGRG1/PLK2/SHH/RTN4RL1/LGALS1/EFNA1/COL3A1/SEMA3F/ID1/GPR37L1/SOX3/ERBB4/G6PD/ASCL2/FGF13/NRP1/SEMA5A/S1PR3/BMP7/NRG3/ASCL1/SOX11/MAG/ARHGAP4/IDH2/FSTL4/ULK2/GPR173/CERS2/RAP1GAP/DMTN/NOTCH3/PPP3CA/MYLIP/LDLR/KIAA0319/MYCN/C16orf45/CIB1/PMP22/JAG1/VIM/CTDSP1/NGFR/PLXNA3/DISP3/STX1B/NOTCH1/IRX3/RNF6/CTNNA1/ZHX2/HES1/TRPC6/TRPV4/ADCY6/RTN4R/KCTD11/EFNB2/INPP5J/NTRK3/GAK	63
BP	GO:0021954	central nervous system neuron development	19|2653	66|14725	0.0212164	0.204633	ENSG00000184845/ENSG00000099250/ENSG00000182704/ENSG00000078018/ENSG00000139352/ENSG00000182580/ENSG00000105711/ENSG00000004848/ENSG00000169136/ENSG00000153234/ENSG00000130827/ENSG00000144290/ENSG00000160007/ENSG00000221866/ENSG00000140937/ENSG00000111678/ENSG00000105953/ENSG00000159388/ENSG00000197381	DRD1/NRP1/TSKU/MAP2/ASCL1/EPHB3/SCN1B/ARX/ATF5/NR4A2/PLXNA3/SLC4A10/ARHGAP35/PLXNA4/CDH11/C12orf57/OGDH/BTG2/ADARB1	19
BP	GO:0009812	flavonoid metabolic process	5|2653	10|14725	0.0213666	0.204633	ENSG00000167165/ENSG00000140465/ENSG00000241635/ENSG00000196502/ENSG00000127948	UGT1A6/CYP1A1/UGT1A1/SULT1A1/POR	5
BP	GO:0010893	positive regulation of steroid biosynthetic process	5|2653	10|14725	0.0213666	0.204633	ENSG00000160179/ENSG00000162552/ENSG00000072310/ENSG00000127948/ENSG00000126368	ABCG1/WNT4/SREBF1/POR/NR1D1	5
BP	GO:0021561	facial nerve development	5|2653	10|14725	0.0213666	0.204633	ENSG00000001617/ENSG00000099250/ENSG00000130827/ENSG00000221866/ENSG00000197381	SEMA3F/NRP1/PLXNA3/PLXNA4/ADARB1	5
BP	GO:0021610	facial nerve morphogenesis	5|2653	10|14725	0.0213666	0.204633	ENSG00000001617/ENSG00000099250/ENSG00000130827/ENSG00000221866/ENSG00000197381	SEMA3F/NRP1/PLXNA3/PLXNA4/ADARB1	5
BP	GO:0032494	response to peptidoglycan	5|2653	10|14725	0.0213666	0.204633	ENSG00000172936/ENSG00000128604/ENSG00000187796/ENSG00000163362/ENSG00000104312	MYD88/IRF5/CARD9/INAVA/RIPK2	5
BP	GO:0042178	xenobiotic catabolic process	5|2653	10|14725	0.0213666	0.204633	ENSG00000168765/ENSG00000134184/ENSG00000140465/ENSG00000241635/ENSG00000134202	GSTM4/GSTM1/CYP1A1/UGT1A1/GSTM3	5
BP	GO:0090557	establishment of endothelial intestinal barrier	5|2653	10|14725	0.0213666	0.204633	ENSG00000172936/ENSG00000163347/ENSG00000090339/ENSG00000158769/ENSG00000119139	MYD88/CLDN1/ICAM1/F11R/TJP2	5
BP	GO:0018212	peptidyl-tyrosine modification	75|2653	334|14725	0.0216736	0.207222	ENSG00000065361/ENSG00000013588/ENSG00000100311/ENSG00000111679/ENSG00000178078/ENSG00000184557/ENSG00000175920/ENSG00000026508/ENSG00000101213/ENSG00000163235/ENSG00000090339/ENSG00000169242/ENSG00000138496/ENSG00000113494/ENSG00000173193/ENSG00000178568/ENSG00000165731/ENSG00000115380/ENSG00000175505/ENSG00000099250/ENSG00000146904/ENSG00000125508/ENSG00000185338/ENSG00000131370/ENSG00000186891…	ERBB3/GPRC5A/PDGFB/PTPN6/STAP2/SOCS3/DOK7/CD44/PTK6/TGFA/ICAM1/EFNA1/PARP9/PRLR/PARP14/ERBB4/RET/EFEMP1/CLCF1/NRP1/EPHA1/SRMS/SOCS1/SH3BP5/TNFRSF18/EPHB3/PDGFA/STAT5A/BANK1/CAV1/PRKCD/DMTN/TNFRSF1A/IL20/PRAG1/AREG/CRLF1/MVP/EPHA10/ADRA2B/ZFYVE28/CUX1/MST1R/IL24/HCK/EPHA2/TTBK1/IGF1R/FGF22/EPHB4/TESK1/IFNL1/CBLC/AFAP1L2/MAP3K11/VEGFA/LIF/HES1/FGF18/ZMYM2/ADRA2C/EGF/GRB2/ZGPAT/SHC1/IL11/PTPN1/TNK2/…	75
BP	GO:0045638	negative regulation of myeloid cell differentiation	21|2653	75|14725	0.0217564	0.20731	ENSG00000119714/ENSG00000158406/ENSG00000128016/ENSG00000100906/ENSG00000131759/ENSG00000179588/ENSG00000145675/ENSG00000197837/ENSG00000123999/ENSG00000070404/ENSG00000185650/ENSG00000185043/ENSG00000273542/ENSG00000166477/ENSG00000270276/ENSG00000130584/ENSG00000276180/ENSG00000122641/ENSG00000204103/ENSG00000270882/ENSG00000126457	GPR68/HIST1H4H/ZFP36/NFKBIA/RARA/ZFPM1/PIK3R1/HIST4H4/INHA/FSTL3/ZFP36L1/CIB1/HIST1H4K/LEO1/HIST2H4B/ZBTB46/HIST1H4I/INHBA/MAFB/HIST2H4A/PRMT1	21
BP	GO:0072332	intrinsic apoptotic signaling pathway by p53 class mediator	21|2653	75|14725	0.0217564	0.20731	ENSG00000176046/ENSG00000069399/ENSG00000026508/ENSG00000176720/ENSG00000124762/ENSG00000168398/ENSG00000174307/ENSG00000161642/ENSG00000073282/ENSG00000163349/ENSG00000131080/ENSG00000185499/ENSG00000168209/ENSG00000186153/ENSG00000165061/ENSG00000183255/ENSG00000088808/ENSG00000164054/ENSG00000165887/ENSG00000128886/ENSG00000103490	NUPR1/BCL3/CD44/BOK/CDKN1A/BDKRB2/PHLDA3/ZNF385A/TP63/HIPK1/EDA2R/MUC1/DDIT4/WWOX/ZMAT4/PTTG1IP/PPP1R13B/SHISA5/ANKRD2/ELL3/PYCARD	21
BP	GO:0070555	response to interleukin-1	40|2653	163|14725	0.0218715	0.208056	ENSG00000095261/ENSG00000172936/ENSG00000090339/ENSG00000115594/ENSG00000078401/ENSG00000185386/ENSG00000163636/ENSG00000100906/ENSG00000051523/ENSG00000163874/ENSG00000120738/ENSG00000003436/ENSG00000205220/ENSG00000107968/ENSG00000172216/ENSG00000169429/ENSG00000108691/ENSG00000104964/ENSG00000102962/ENSG00000092010/ENSG00000115009/ENSG00000101182/ENSG00000006606/ENSG00000168884/ENSG00000007908…	PSMD5/MYD88/ICAM1/IL1R1/EDN1/MAPK11/PSMD6/NFKBIA/CYBA/ZC3H12A/EGR1/TFPI/PSMB10/MAP3K8/CEBPB/CXCL8/CCL2/AES/CCL22/PSME1/CCL20/PSMA7/CCL26/TNIP2/SELE/PSMC5/RPS6KA4/UBC/IKBKG/PSME2/DAB2IP/SQSTM1/IL1RN/PSMD4/OTUB1/PYCARD/MAPK3/RIPK2/UBE2V1/PSMB4	40
BP	GO:0046425	regulation of JAK-STAT cascade	30|2653	116|14725	0.0219147	0.208116	ENSG00000069399/ENSG00000178078/ENSG00000184557/ENSG00000185924/ENSG00000138061/ENSG00000101213/ENSG00000138496/ENSG00000113494/ENSG00000173193/ENSG00000178568/ENSG00000165731/ENSG00000175505/ENSG00000185338/ENSG00000186891/ENSG00000132000/ENSG00000172061/ENSG00000198739/ENSG00000105974/ENSG00000067182/ENSG00000114737/ENSG00000162891/ENSG00000006016/ENSG00000162892/ENSG00000135439/ENSG00000182393…	BCL3/STAP2/SOCS3/RTN4RL1/CYP1B1/PTK6/PARP9/PRLR/PARP14/ERBB4/RET/CLCF1/SOCS1/TNFRSF18/PODNL1/LRRC15/LRRTM3/CAV1/TNFRSF1A/CISH/IL20/CRLF1/IL24/AGAP2/IFNL1/NOTCH1/LIF/HES1/RTN4R/LRRC4	30
BP	GO:0033622	integrin activation	7|2653	17|14725	0.0220822	0.209002	ENSG00000107562/ENSG00000171522/ENSG00000170476/ENSG00000103335/ENSG00000115414/ENSG00000162458/ENSG00000084636	CXCL12/PTGER4/MZB1/PIEZO1/FN1/FBLIM1/COL16A1	7
BP	GO:0060644	mammary gland epithelial cell differentiation	7|2653	17|14725	0.0220822	0.209002	ENSG00000117595/ENSG00000178568/ENSG00000170430/ENSG00000135374/ENSG00000142208/ENSG00000172216/ENSG00000105221	IRF6/ERBB4/MGMT/ELF5/AKT1/CEBPB/AKT2	7
BP	GO:0045071	negative regulation of viral genome replication	15|2653	49|14725	0.0222448	0.210189	ENSG00000142089/ENSG00000187608/ENSG00000157601/ENSG00000111331/ENSG00000166801/ENSG00000135114/ENSG00000130303/ENSG00000178685/ENSG00000163874/ENSG00000089127/ENSG00000172183/ENSG00000185201/ENSG00000130813/ENSG00000185885/ENSG00000134321	IFITM3/ISG15/MX1/OAS3/FAM111A/OASL/BST2/PARP10/ZC3H12A/OAS1/ISG20/IFITM2/C19orf66/IFITM1/RSAD2	15
BP	GO:0003205	cardiac chamber development	37|2653	149|14725	0.022389	0.211198	ENSG00000107485/ENSG00000121068/ENSG00000101115/ENSG00000075223/ENSG00000092969/ENSG00000099250/ENSG00000131759/ENSG00000125618/ENSG00000101144/ENSG00000082482/ENSG00000186350/ENSG00000176887/ENSG00000179588/ENSG00000083307/ENSG00000104881/ENSG00000112414/ENSG00000159173/ENSG00000004399/ENSG00000140416/ENSG00000137868/ENSG00000120149/ENSG00000101384/ENSG00000125850/ENSG00000164442/ENSG00000057294…	GATA3/TBX2/SALL4/SEMA3C/TGFB2/NRP1/RARA/PAX8/BMP7/KCNK2/RXRA/SOX11/ZFPM1/GRHL2/PPP1R13L/ADGRG6/TNNI1/PLXND1/TPM1/STRA6/MSX2/JAG1/OVOL2/CITED2/PKP2/MESP1/DSP/NPY5R/NOTCH1/PARVA/FGFRL1/HES1/NPRL3/DLL4/SMAD6/CCM2L/SMAD7	37
BP	GO:0007188	adenylate cyclase-modulating G-protein coupled receptor signaling pathway	34|2653	135|14725	0.0227256	0.214016	ENSG00000170775/ENSG00000124493/ENSG00000170075/ENSG00000109062/ENSG00000164128/ENSG00000078401/ENSG00000184845/ENSG00000156049/ENSG00000173175/ENSG00000128165/ENSG00000171522/ENSG00000182704/ENSG00000213694/ENSG00000168539/ENSG00000113389/ENSG00000164850/ENSG00000163873/ENSG00000122679/ENSG00000065325/ENSG00000112414/ENSG00000179546/ENSG00000258839/ENSG00000196924/ENSG00000087460/ENSG00000274286…	GPR37/GRM4/GPR37L1/SLC9A3R1/NPY1R/EDN1/DRD1/GNA14/ADCY5/ADM2/PTGER4/TSKU/S1PR3/CHRM1/NPR3/GPER1/GRIK3/RAMP3/GLP2R/ADGRG6/HTR1D/MC1R/FLNA/GNAS/ADRA2B/ABCA1/GNAI2/ADGRD1/ADCY9/ADCY6/ADRA2C/CACNA1D/GNAT1/PSAP	34
BP	GO:0070371	ERK1 and ERK2 cascade	55|2653	236|14725	0.0229313	0.215593	ENSG00000144476/ENSG00000100311/ENSG00000111679/ENSG00000161905/ENSG00000167653/ENSG00000026508/ENSG00000090339/ENSG00000178568/ENSG00000109062/ENSG00000134830/ENSG00000120875/ENSG00000168743/ENSG00000136826/ENSG00000171522/ENSG00000099250/ENSG00000187678/ENSG00000164850/ENSG00000122679/ENSG00000197461/ENSG00000152518/ENSG00000126353/ENSG00000185650/ENSG00000162545/ENSG00000126458/ENSG00000108691…	ACKR3/PDGFB/PTPN6/ALOX15/PSCA/CD44/ICAM1/ERBB4/SLC9A3R1/C5AR2/DUSP4/NPNT/KLF4/PTGER4/NRP1/SPRY4/GPER1/RAMP3/PDGFA/ZFP36L2/CCR7/ZFP36L1/CAMK2N1/RRAS/CCL2/CCL22/FN1/CIB1/EPHA2/NDRG4/GPNMB/CCL20/NPY5R/NOTCH1/CCL26/ARHGAP8/RASGRP1/CTSH/ATP6AP1/LIF/TRPV4/FGF18/ARRB1/EGF/DAB2IP/PRKD2/SHC1/HRAS/NPTN/PTPN1/ARAF/PYCARD/MAPK3/RIPK2/ERBB2	55
BP	GO:0007265	Ras protein signal transduction	74|2653	330|14725	0.0231147	0.216039	ENSG00000165140/ENSG00000205336/ENSG00000124126/ENSG00000145632/ENSG00000177106/ENSG00000125637/ENSG00000168542/ENSG00000173156/ENSG00000127084/ENSG00000142675/ENSG00000124762/ENSG00000131037/ENSG00000130762/ENSG00000142632/ENSG00000112379/ENSG00000005884/ENSG00000185386/ENSG00000008323/ENSG00000092969/ENSG00000099250/ENSG00000140945/ENSG00000113916/ENSG00000089820/ENSG00000111344/ENSG00000182957…	FBP1/ADGRG1/PREX1/PLK2/EPS8L2/PSD4/COL3A1/RHOD/FGD3/CNKSR1/CDKN1A/EPS8L1/ARHGEF16/ARHGEF19/ARFGEF3/ITGA3/MAPK11/PLEKHG6/TGFB2/NRP1/CDH13/BCL6/ARHGAP4/RASAL1/SPATA13/ARHGEF5/-/ARHGEF10L/RRAS/RHOB/MAPKAPK2/ARHGEF37/RASA3/WAS/ABCA1/-/VAV2/PLEKHG5/PAK4/ARHGEF28/ARHGEF17/CYTH2/NGFR/MCF2L/ABR/ARHGAP1/MADD/CELSR1/ARHGAP35/NOTCH1/CFL1/-/RASGRP1/BRK1/-/ARRB1/RIPOR1/RTN4R/LIMK1/GRB2/DAB2IP/SQSTM1/CYFIP1/IQ…	74
BP	GO:0006898	receptor-mediated endocytosis	56|2653	241|14725	0.0231223	0.216039	ENSG00000144476/ENSG00000107984/ENSG00000184012/ENSG00000010278/ENSG00000099994/ENSG00000087085/ENSG00000145103/ENSG00000137747/ENSG00000153246/ENSG00000010704/ENSG00000160183/ENSG00000122679/ENSG00000137648/ENSG00000182718/ENSG00000106367/ENSG00000197324/ENSG00000161921/ENSG00000120885/ENSG00000105974/ENSG00000130475/ENSG00000169429/ENSG00000108679/ENSG00000135404/ENSG00000106327/ENSG00000130164…	ACKR3/DKK1/TMPRSS2/CD9/SUSD2/ACHE/ILDR1/TMPRSS13/PLA2R1/HFE/TMPRSS3/RAMP3/TMPRSS4/ANXA2/AP1S1/LRP10/CXCL16/CLU/CAV1/FCHO1/CXCL8/LGALS3BP/CD63/TFR2/LDLR/CD163L1/HSPG2/FOLR1/APOBR/AMBP/SNAP25/CTTN/HIP1R/SELE/LOXL2/VEGFA/AP2M1/AP2S1/GRK2/ARRB1/EGF/VLDLR/GRB2/TBC1D5/CLTB/PDLIM7/TNK2/SCARB1/CLTC/CAV2/CD5/SERPINE1/ACKR2/ARHGAP27/WASL/GAK	56
BP	GO:0002286	T cell activation involved in immune response	20|2653	71|14725	0.0232163	0.216039	ENSG00000107485/ENSG00000131981/ENSG00000069399/ENSG00000090339/ENSG00000156127/ENSG00000171522/ENSG00000136167/ENSG00000131759/ENSG00000160685/ENSG00000113916/ENSG00000196189/ENSG00000179588/ENSG00000018280/ENSG00000104856/ENSG00000143365/ENSG00000118513/ENSG00000182393/ENSG00000197272/ENSG00000101665/ENSG00000104312	GATA3/LGALS3/BCL3/ICAM1/BATF/PTGER4/LCP1/RARA/ZBTB7B/BCL6/SEMA4A/ZFPM1/SLC11A1/RELB/RORC/MYB/IFNL1/IL27/SMAD7/RIPK2	20
BP	GO:0098659	inorganic cation import across plasma membrane	14|2653	45|14725	0.0232292	0.216039	ENSG00000162989/ENSG00000130529/ENSG00000115616/ENSG00000010704/ENSG00000122679/ENSG00000099822/ENSG00000090020/ENSG00000143153/ENSG00000175220/ENSG00000141424/ENSG00000165125/ENSG00000065923/ENSG00000180251/ENSG00000138622	KCNJ3/TRPM4/SLC9A2/HFE/RAMP3/HCN2/SLC9A1/ATP1B1/ARHGAP1/SLC39A6/TRPV6/SLC9A7/SLC9A4/HCN4	14
BP	GO:0099587	inorganic ion import across plasma membrane	14|2653	45|14725	0.0232292	0.216039	ENSG00000162989/ENSG00000130529/ENSG00000115616/ENSG00000010704/ENSG00000122679/ENSG00000099822/ENSG00000090020/ENSG00000143153/ENSG00000175220/ENSG00000141424/ENSG00000165125/ENSG00000065923/ENSG00000180251/ENSG00000138622	KCNJ3/TRPM4/SLC9A2/HFE/RAMP3/HCN2/SLC9A1/ATP1B1/ARHGAP1/SLC39A6/TRPV6/SLC9A7/SLC9A4/HCN4	14
BP	GO:2000179	positive regulation of neural precursor cell proliferation	14|2653	45|14725	0.0232292	0.216039	ENSG00000205336/ENSG00000164690/ENSG00000170075/ENSG00000139352/ENSG00000196924/ENSG00000204624/ENSG00000148400/ENSG00000112715/ENSG00000132688/ENSG00000138798/ENSG00000128917/ENSG00000128886/ENSG00000150630/ENSG00000198026	ADGRG1/SHH/GPR37L1/ASCL1/FLNA/DISP3/NOTCH1/VEGFA/NES/EGF/DLL4/ELL3/VEGFC/ZNF335	14
BP	GO:0090276	regulation of peptide hormone secretion	43|2653	178|14725	0.0232469	0.216039	ENSG00000163083/ENSG00000119714/ENSG00000183044/ENSG00000011347/ENSG00000169047/ENSG00000270885/ENSG00000170745/ENSG00000145103/ENSG00000173175/ENSG00000130529/ENSG00000125618/ENSG00000164850/ENSG00000072310/ENSG00000010704/ENSG00000110090/ENSG00000003147/ENSG00000117394/ENSG00000096433/ENSG00000138814/ENSG00000126262/ENSG00000170498/ENSG00000106327/ENSG00000087460/ENSG00000136999/ENSG00000196126…	INHBB/GPR68/ABAT/SYT7/IRS1/RASL10B/KCNS3/ILDR1/ADCY5/TRPM4/PAX8/GPER1/SREBF1/HFE/CPT1A/ICA1/SLC2A1/ITPR3/PPP3CA/FFAR2/KISS1/TFR2/GNAS/NOV/HLA-DRB1/STX1A/SLC25A6/SNAP25/PFKL/LRP5/MIDN/AACS/PIM3/ITPR1/PHPT1/NR1D1/ADRA2C/ARRB1/SSTR5/KCNJ11/MYRIP/CACNA1D/PER2	43
BP	GO:0001818	negative regulation of cytokine production	49|2653	207|14725	0.02334	0.21648	ENSG00000137801/ENSG00000107485/ENSG00000062038/ENSG00000163083/ENSG00000069399/ENSG00000189058/ENSG00000115267/ENSG00000187608/ENSG00000263528/ENSG00000205542/ENSG00000128016/ENSG00000134830/ENSG00000130303/ENSG00000136826/ENSG00000171522/ENSG00000092969/ENSG00000131759/ENSG00000010704/ENSG00000113916/ENSG00000161031/ENSG00000179588/ENSG00000163874/ENSG00000018280/ENSG00000104856/ENSG00000153064…	THBS1/GATA3/CDH3/INHBB/BCL3/APOD/IFIH1/ISG15/IKBKE/TMSB4X/ZFP36/C5AR2/BST2/KLF4/PTGER4/TGFB2/RARA/HFE/BCL6/PGLYRP2/ZFPM1/ZC3H12A/SLC11A1/RELB/BANK1/INHA/MC1R/NMI/SIGIRR/TRIM25/TGFB3/FN1/HLA-DRB1/ANXA4/GPNMB/IFNL1/TNFRSF21/FURIN/UBE2L6/RPS6KA4/ARRB1/UBC/IRF3/INHBA/DHX58/SMAD7/PYCARD/HDAC7/CPTP	49
BP	GO:0050709	negative regulation of protein secretion	24|2653	89|14725	0.0233711	0.21648	ENSG00000163083/ENSG00000205542/ENSG00000134830/ENSG00000169047/ENSG00000171522/ENSG00000007384/ENSG00000072310/ENSG00000182054/ENSG00000163874/ENSG00000153064/ENSG00000138814/ENSG00000115414/ENSG00000136999/ENSG00000196975/ENSG00000141959/ENSG00000167470/ENSG00000146072/ENSG00000198355/ENSG00000134321/ENSG00000129667/ENSG00000089248/ENSG00000139644/ENSG00000187486/ENSG00000224051	INHBB/TMSB4X/C5AR2/IRS1/PTGER4/RHBDF1/SREBF1/IDH2/ZC3H12A/BANK1/PPP3CA/FN1/NOV/ANXA4/PFKL/MIDN/TNFRSF21/PIM3/RSAD2/RHBDF2/ERP29/TMBIM6/KCNJ11/CPTP	24
BP	GO:0010717	regulation of epithelial to mesenchymal transition	22|2653	80|14725	0.0234593	0.216586	ENSG00000129514/ENSG00000095739/ENSG00000169242/ENSG00000186174/ENSG00000092969/ENSG00000101144/ENSG00000130558/ENSG00000115109/ENSG00000105707/ENSG00000119699/ENSG00000168675/ENSG00000166949/ENSG00000125850/ENSG00000168140/ENSG00000148400/ENSG00000134013/ENSG00000136848/ENSG00000173402/ENSG00000128886/ENSG00000124216/ENSG00000101665/ENSG00000167985	FOXA1/BAMBI/EFNA1/BCL9L/TGFB2/BMP7/OLFM1/EPB41L5/HPN/TGFB3/LDLRAD4/SMAD3/OVOL2/VASN/NOTCH1/LOXL2/DAB2IP/DAG1/ELL3/SNAI1/SMAD7/SDHAF2	22
BP	GO:0060840	artery development	22|2653	80|14725	0.0234593	0.216586	ENSG00000164690/ENSG00000121068/ENSG00000168542/ENSG00000092969/ENSG00000099250/ENSG00000129038/ENSG00000004399/ENSG00000108175/ENSG00000074181/ENSG00000137868/ENSG00000110195/ENSG00000101384/ENSG00000164442/ENSG00000148400/ENSG00000112715/ENSG00000114315/ENSG00000103148/ENSG00000128917/ENSG00000137834/ENSG00000125266/ENSG00000101665/ENSG00000189079	SHH/TBX2/COL3A1/TGFB2/NRP1/LOXL1/PLXND1/ZMIZ1/NOTCH3/STRA6/FOLR1/JAG1/CITED2/NOTCH1/VEGFA/HES1/NPRL3/DLL4/SMAD6/EFNB2/SMAD7/ARID2	22
BP	GO:0002576	platelet degranulation	29|2653	112|14725	0.0235674	0.217228	ENSG00000137801/ENSG00000100311/ENSG00000010278/ENSG00000205542/ENSG00000041353/ENSG00000092969/ENSG00000116260/ENSG00000197461/ENSG00000120885/ENSG00000158856/ENSG00000127824/ENSG00000196924/ENSG00000108679/ENSG00000135404/ENSG00000119699/ENSG00000115414/ENSG00000071127/ENSG00000106538/ENSG00000072110/ENSG00000196136/ENSG00000149131/ENSG00000112715/ENSG00000138798/ENSG00000110799/ENSG00000076944…	THBS1/PDGFB/CD9/TMSB4X/RAB27B/TGFB2/QSOX1/PDGFA/CLU/DMTN/TUBA4A/FLNA/LGALS3BP/CD63/TGFB3/FN1/WDR1/RARRES2/ACTN1/SERPINA3/SERPING1/VEGFA/EGF/VWF/STXBP2/PSAP/SERPINE1/VEGFC/CALM1	29
BP	GO:0033077	T cell differentiation in thymus	17|2653	58|14725	0.0238679	0.219281	ENSG00000107485/ENSG00000164690/ENSG00000179388/ENSG00000162552/ENSG00000152518/ENSG00000126353/ENSG00000185650/ENSG00000184916/ENSG00000127152/ENSG00000134516/ENSG00000172575/ENSG00000109101/ENSG00000151651/ENSG00000104853/ENSG00000204103/ENSG00000163251/ENSG00000141736	GATA3/SHH/EGR3/WNT4/ZFP36L2/CCR7/ZFP36L1/JAG2/BCL11B/DOCK2/RASGRP1/FOXN1/ADAM8/CLPTM1/MAFB/FZD5/ERBB2	17
BP	GO:0060135	maternal process involved in female pregnancy	17|2653	58|14725	0.0238679	0.219281	ENSG00000091831/ENSG00000159167/ENSG00000171223/ENSG00000182195/ENSG00000082175/ENSG00000005884/ENSG00000113739/ENSG00000162552/ENSG00000186350/ENSG00000169083/ENSG00000165474/ENSG00000142208/ENSG00000111424/ENSG00000164442/ENSG00000185551/ENSG00000128342/ENSG00000164733	ESR1/STC1/JUNB/LDOC1/PGR/ITGA3/STC2/WNT4/RXRA/AR/GJB2/AKT1/VDR/CITED2/NR2F2/LIF/CTSB	17
BP	GO:0086009	membrane repolarization	13|2653	41|14725	0.0241255	0.220378	ENSG00000162989/ENSG00000055118/ENSG00000167535/ENSG00000105711/ENSG00000143153/ENSG00000105974/ENSG00000080709/ENSG00000196924/ENSG00000071127/ENSG00000198929/ENSG00000171385/ENSG00000157388/ENSG00000049759	KCNJ3/KCNH2/CACNB3/SCN1B/ATP1B1/CAV1/KCNN2/FLNA/WDR1/NOS1AP/KCND3/CACNA1D/NEDD4L	13
BP	GO:0010640	regulation of platelet-derived growth factor receptor signaling pathway	8|2653	21|14725	0.0242216	0.220378	ENSG00000100311/ENSG00000189058/ENSG00000109062/ENSG00000197461/ENSG00000149177/ENSG00000057593/ENSG00000103034/ENSG00000130787	PDGFB/APOD/SLC9A3R1/PDGFA/PTPRJ/F7/NDRG4/HIP1R	8
BP	GO:0010954	positive regulation of protein processing	8|2653	21|14725	0.0242216	0.220378	ENSG00000125730/ENSG00000188886/ENSG00000148180/ENSG00000130173/ENSG00000105707/ENSG00000100345/ENSG00000131187/ENSG00000151651	C3/ASTL/GSN/ANGPTL8/HPN/MYH9/F12/ADAM8	8
BP	GO:0032462	regulation of protein homooligomerization	8|2653	21|14725	0.0242216	0.220378	ENSG00000181885/ENSG00000100290/ENSG00000104081/ENSG00000120885/ENSG00000015475/ENSG00000155366/ENSG00000105327/ENSG00000177427	CLDN7/BIK/BMF/CLU/BID/RHOC/BBC3/MIEF2	8
BP	GO:0046697	decidualization	8|2653	21|14725	0.0242216	0.220378	ENSG00000159167/ENSG00000171223/ENSG00000113739/ENSG00000165474/ENSG00000111424/ENSG00000164442/ENSG00000128342/ENSG00000164733	STC1/JUNB/STC2/GJB2/VDR/CITED2/LIF/CTSB	8
BP	GO:1902667	regulation of axon guidance	8|2653	21|14725	0.0242216	0.220378	ENSG00000107562/ENSG00000001617/ENSG00000171587/ENSG00000099250/ENSG00000112902/ENSG00000130827/ENSG00000221866/ENSG00000112715	CXCL12/SEMA3F/DSCAM/NRP1/SEMA5A/PLXNA3/PLXNA4/VEGFA	8
BP	GO:0071222	cellular response to lipopolysaccharide	33|2653	131|14725	0.0244535	0.221832	ENSG00000172936/ENSG00000090339/ENSG00000128016/ENSG00000100219/ENSG00000100906/ENSG00000131759/ENSG00000163874/ENSG00000134326/ENSG00000132256/ENSG00000003436/ENSG00000142208/ENSG00000172216/ENSG00000189067/ENSG00000185187/ENSG00000169429/ENSG00000108691/ENSG00000165029/ENSG00000137462/ENSG00000130707/ENSG00000162892/ENSG00000101336/ENSG00000127666/ENSG00000064932/ENSG00000115009/ENSG00000168884…	MYD88/ICAM1/ZFP36/XBP1/NFKBIA/RARA/ZC3H12A/CMPK2/TRIM5/TFPI/AKT1/CEBPB/LITAF/SIGIRR/CXCL8/CCL2/ABCA1/TLR2/ASS1/IL24/HCK/TICAM1/SBNO2/CCL20/TNIP2/NR1D1/IRF3/DAB2IP/SCARB1/PYCARD/MAPK3/RIPK2/SERPINE1	33
BP	GO:0001736	establishment of planar polarity	30|2653	117|14725	0.0245388	0.221832	ENSG00000107984/ENSG00000095261/ENSG00000158055/ENSG00000142632/ENSG00000102981/ENSG00000163637/ENSG00000163636/ENSG00000143126/ENSG00000073282/ENSG00000186193/ENSG00000205220/ENSG00000071127/ENSG00000148219/ENSG00000008300/ENSG00000092010/ENSG00000101182/ENSG00000075275/ENSG00000087191/ENSG00000161203/ENSG00000042753/ENSG00000150991/ENSG00000100911/ENSG00000159352/ENSG00000100592/ENSG00000173218…	DKK1/PSMD5/GRHL3/ARHGEF19/PARD6A/PRICKLE2/PSMD6/CELSR2/TP63/SAPCD2/PSMB10/WDR1/ASTN2/CELSR3/PSME1/PSMA7/CELSR1/PSMC5/AP2M1/AP2S1/UBC/PSME2/PSMD4/DAAM1/VANGL1/CLTC/DVL3/SMURF1/FZD5/PSMB4	30
BP	GO:0007164	establishment of tissue polarity	30|2653	117|14725	0.0245388	0.221832	ENSG00000107984/ENSG00000095261/ENSG00000158055/ENSG00000142632/ENSG00000102981/ENSG00000163637/ENSG00000163636/ENSG00000143126/ENSG00000073282/ENSG00000186193/ENSG00000205220/ENSG00000071127/ENSG00000148219/ENSG00000008300/ENSG00000092010/ENSG00000101182/ENSG00000075275/ENSG00000087191/ENSG00000161203/ENSG00000042753/ENSG00000150991/ENSG00000100911/ENSG00000159352/ENSG00000100592/ENSG00000173218…	DKK1/PSMD5/GRHL3/ARHGEF19/PARD6A/PRICKLE2/PSMD6/CELSR2/TP63/SAPCD2/PSMB10/WDR1/ASTN2/CELSR3/PSME1/PSMA7/CELSR1/PSMC5/AP2M1/AP2S1/UBC/PSME2/PSMD4/DAAM1/VANGL1/CLTC/DVL3/SMURF1/FZD5/PSMB4	30
BP	GO:1904892	regulation of STAT cascade	30|2653	117|14725	0.0245388	0.221832	ENSG00000069399/ENSG00000178078/ENSG00000184557/ENSG00000185924/ENSG00000138061/ENSG00000101213/ENSG00000138496/ENSG00000113494/ENSG00000173193/ENSG00000178568/ENSG00000165731/ENSG00000175505/ENSG00000185338/ENSG00000186891/ENSG00000132000/ENSG00000172061/ENSG00000198739/ENSG00000105974/ENSG00000067182/ENSG00000114737/ENSG00000162891/ENSG00000006016/ENSG00000162892/ENSG00000135439/ENSG00000182393…	BCL3/STAP2/SOCS3/RTN4RL1/CYP1B1/PTK6/PARP9/PRLR/PARP14/ERBB4/RET/CLCF1/SOCS1/TNFRSF18/PODNL1/LRRC15/LRRTM3/CAV1/TNFRSF1A/CISH/IL20/CRLF1/IL24/AGAP2/IFNL1/NOTCH1/LIF/HES1/RTN4R/LRRC4	30
BP	GO:0002687	positive regulation of leukocyte migration	25|2653	94|14725	0.0247497	0.223024	ENSG00000137801/ENSG00000189334/ENSG00000131981/ENSG00000107562/ENSG00000090339/ENSG00000115594/ENSG00000078401/ENSG00000188372/ENSG00000186891/ENSG00000107099/ENSG00000127129/ENSG00000126353/ENSG00000169429/ENSG00000057593/ENSG00000106538/ENSG00000115009/ENSG00000112715/ENSG00000035664/ENSG00000111199/ENSG00000151651/ENSG00000103490/ENSG00000102882/ENSG00000106366/ENSG00000100739/ENSG00000150630	THBS1/S100A14/LGALS3/CXCL12/ICAM1/IL1R1/EDN1/ZP3/TNFRSF18/DOCK8/EDN2/CCR7/CXCL8/F7/RARRES2/CCL20/VEGFA/DAPK2/TRPV4/ADAM8/PYCARD/MAPK3/SERPINE1/BDKRB1/VEGFC	25
BP	GO:0007229	integrin-mediated signaling pathway	25|2653	94|14725	0.0247497	0.223024	ENSG00000111859/ENSG00000132470/ENSG00000168542/ENSG00000115221/ENSG00000005884/ENSG00000099250/ENSG00000130702/ENSG00000213853/ENSG00000158856/ENSG00000169896/ENSG00000196924/ENSG00000135404/ENSG00000100345/ENSG00000143537/ENSG00000101336/ENSG00000082781/ENSG00000050820/ENSG00000196776/ENSG00000139626/ENSG00000044115/ENSG00000159840/ENSG00000084636/ENSG00000134215/ENSG00000136280/ENSG00000141968	NEDD9/ITGB4/COL3A1/ITGB6/ITGA3/NRP1/LAMA5/EMP2/DMTN/ITGAM/FLNA/CD63/MYH9/ADAM15/HCK/ITGB5/BCAR1/CD47/ITGB7/CTNNA1/ZYX/COL16A1/VAV3/CCM2/VAV1	25
BP	GO:0001822	kidney development	57|2653	247|14725	0.0251216	0.225612	ENSG00000184292/ENSG00000107485/ENSG00000188064/ENSG00000119888/ENSG00000100311/ENSG00000176788/ENSG00000164690/ENSG00000196562/ENSG00000170561/ENSG00000165731/ENSG00000005884/ENSG00000248905/ENSG00000100373/ENSG00000124145/ENSG00000172818/ENSG00000168743/ENSG00000092969/ENSG00000099250/ENSG00000115884/ENSG00000131759/ENSG00000125618/ENSG00000101144/ENSG00000198598/ENSG00000162552/ENSG00000176887…	TACSTD2/GATA3/WNT7B/EPCAM/PDGFB/BASP1/SHH/SULF2/IRX2/RET/ITGA3/FMN1/UPK3A/SDC4/OVOL1/NPNT/TGFB2/NRP1/SDC1/RARA/PAX8/BMP7/MMP17/WNT4/SOX11/LAMA5/OSR2/PDGFA/GLIS2/EGR1/PODXL/FSTL3/NOTCH3/CRLF1/GCNT1/STRA6/TNS2/TFAP2A/ASS1/JAG1/SMAD3/LAMB2/ARID5B/NOTCH1/WFS1/CTNNBIP1/IRX3/CTSH/VEGFA/LIF/HES1/SMAD6/APH1A/EFNB2/SMAD7/REN/NPHS1	57
BP	GO:1901185	negative regulation of ERBB signaling pathway	16|2653	54|14725	0.0252452	0.225612	ENSG00000065361/ENSG00000013588/ENSG00000178568/ENSG00000149177/ENSG00000159733/ENSG00000142273/ENSG00000138798/ENSG00000150991/ENSG00000177885/ENSG00000136848/ENSG00000197114/ENSG00000127527/ENSG00000072135/ENSG00000265491/ENSG00000141736/ENSG00000070159	ERBB3/GPRC5A/ERBB4/PTPRJ/ZFYVE28/CBLC/EGF/UBC/GRB2/DAB2IP/ZGPAT/EPS15L1/PTPN18/RNF115/ERBB2/PTPN3	16
BP	GO:0032731	positive regulation of interleukin-1 beta production	9|2653	25|14725	0.0252768	0.225612	ENSG00000106211/ENSG00000120738/ENSG00000166949/ENSG00000156515/ENSG00000163362/ENSG00000103490/ENSG00000104312/ENSG00000163251/ENSG00000221926	HSPB1/EGR1/SMAD3/HK1/INAVA/PYCARD/RIPK2/FZD5/TRIM16	9
BP	GO:0051385	response to mineralocorticoid	9|2653	25|14725	0.0252768	0.225612	ENSG00000124762/ENSG00000078401/ENSG00000170345/ENSG00000110092/ENSG00000051523/ENSG00000164850/ENSG00000180176/ENSG00000175592/ENSG00000140538	CDKN1A/EDN1/FOS/CCND1/CYBA/GPER1/TH/FOSL1/NTRK3	9
BP	GO:0051905	establishment of pigment granule localization	9|2653	25|14725	0.0252768	0.225612	ENSG00000115648/ENSG00000062038/ENSG00000146950/ENSG00000124839/ENSG00000041353/ENSG00000101850/ENSG00000118242/ENSG00000197535/ENSG00000189114	MLPH/CDH3/SHROOM2/RAB17/RAB27B/GPR143/MREG/MYO5A/BLOC1S3	9
BP	GO:0060251	regulation of glial cell proliferation	9|2653	25|14725	0.0252768	0.225612	ENSG00000183734/ENSG00000176887/ENSG00000182054/ENSG00000143418/ENSG00000244405/ENSG00000118513/ENSG00000027075/ENSG00000148400/ENSG00000114315	ASCL2/SOX11/IDH2/CERS2/ETV5/MYB/PRKCH/NOTCH1/HES1	9
BP	GO:0002686	negative regulation of leukocyte migration	10|2653	29|14725	0.0255918	0.228062	ENSG00000189058/ENSG00000107562/ENSG00000134830/ENSG00000171522/ENSG00000117115/ENSG00000108691/ENSG00000151882/ENSG00000136999/ENSG00000159842/ENSG00000106299	APOD/CXCL12/C5AR2/PTGER4/PADI2/CCL2/CCL28/NOV/ABR/WASL	10
BP	GO:0045665	negative regulation of neuron differentiation	45|2653	189|14725	0.0261996	0.23311	ENSG00000145632/ENSG00000164690/ENSG00000185924/ENSG00000100097/ENSG00000169242/ENSG00000001617/ENSG00000125968/ENSG00000170075/ENSG00000134595/ENSG00000129682/ENSG00000099250/ENSG00000112902/ENSG00000101144/ENSG00000139352/ENSG00000105695/ENSG00000089820/ENSG00000053108/ENSG00000083290/ENSG00000143418/ENSG00000076864/ENSG00000074181/ENSG00000138814/ENSG00000007944/ENSG00000137261/ENSG00000185043…	PLK2/SHH/RTN4RL1/LGALS1/EFNA1/SEMA3F/ID1/GPR37L1/SOX3/FGF13/NRP1/SEMA5A/BMP7/ASCL1/MAG/ARHGAP4/FSTL4/ULK2/CERS2/RAP1GAP/NOTCH3/PPP3CA/MYLIP/KIAA0319/CIB1/PMP22/JAG1/VIM/CTDSP1/NGFR/PLXNA3/DISP3/STX1B/NOTCH1/IRX3/RNF6/ZHX2/HES1/TRPC6/TRPV4/ADCY6/RTN4R/EFNB2/INPP5J/GAK	45
BP	GO:0072073	kidney epithelium development	32|2653	127|14725	0.0263194	0.233557	ENSG00000184292/ENSG00000107485/ENSG00000188064/ENSG00000119888/ENSG00000176788/ENSG00000164690/ENSG00000170561/ENSG00000165731/ENSG00000248905/ENSG00000124145/ENSG00000168743/ENSG00000115884/ENSG00000131759/ENSG00000125618/ENSG00000101144/ENSG00000162552/ENSG00000130702/ENSG00000128567/ENSG00000006016/ENSG00000101384/ENSG00000166949/ENSG00000172037/ENSG00000148400/ENSG00000178585/ENSG00000177508…	TACSTD2/GATA3/WNT7B/EPCAM/BASP1/SHH/IRX2/RET/FMN1/SDC4/NPNT/SDC1/RARA/PAX8/BMP7/WNT4/LAMA5/PODXL/CRLF1/JAG1/SMAD3/LAMB2/NOTCH1/CTNNBIP1/IRX3/VEGFA/LIF/HES1/SMAD6/EFNB2/SMAD7/NPHS1	32
BP	GO:0048708	astrocyte differentiation	18|2653	63|14725	0.026374	0.233557	ENSG00000164690/ENSG00000163220/ENSG00000170075/ENSG00000184845/ENSG00000175505/ENSG00000105695/ENSG00000143546/ENSG00000130164/ENSG00000134323/ENSG00000026025/ENSG00000146216/ENSG00000172037/ENSG00000148400/ENSG00000128342/ENSG00000114315/ENSG00000102882/ENSG00000145191/ENSG00000140538	SHH/S100A9/GPR37L1/DRD1/CLCF1/MAG/S100A8/LDLR/MYCN/VIM/TTBK1/LAMB2/NOTCH1/LIF/HES1/MAPK3/EIF2B5/NTRK3	18
BP	GO:2001057	reactive nitrogen species metabolic process	18|2653	63|14725	0.026374	0.233557	ENSG00000181019/ENSG00000138061/ENSG00000090339/ENSG00000078401/ENSG00000136826/ENSG00000163874/ENSG00000120885/ENSG00000105974/ENSG00000142208/ENSG00000137462/ENSG00000130707/ENSG00000127666/ENSG00000166949/ENSG00000003989/ENSG00000127948/ENSG00000198929/ENSG00000135124/ENSG00000131979	NQO1/CYP1B1/ICAM1/EDN1/KLF4/ZC3H12A/CLU/CAV1/AKT1/TLR2/ASS1/TICAM1/SMAD3/SLC7A2/POR/NOS1AP/P2RX4/GCH1	18
BP	GO:0031295	T cell costimulation	15|2653	50|14725	0.0266357	0.234037	ENSG00000111679/ENSG00000100097/ENSG00000145675/ENSG00000198502/ENSG00000107968/ENSG00000105974/ENSG00000126353/ENSG00000142208/ENSG00000196126/ENSG00000006062/ENSG00000177885/ENSG00000125266/ENSG00000110448/ENSG00000141968/ENSG00000161270	PTPN6/LGALS1/PIK3R1/HLA-DRB5/MAP3K8/CAV1/CCR7/AKT1/HLA-DRB1/MAP3K14/GRB2/EFNB2/CD5/VAV1/NPHS1	15
BP	GO:0042531	positive regulation of tyrosine phosphorylation of STAT protein	15|2653	50|14725	0.0266357	0.234037	ENSG00000178078/ENSG00000184557/ENSG00000101213/ENSG00000138496/ENSG00000173193/ENSG00000178568/ENSG00000175505/ENSG00000186891/ENSG00000067182/ENSG00000162891/ENSG00000006016/ENSG00000162892/ENSG00000182393/ENSG00000128342/ENSG00000114315	STAP2/SOCS3/PTK6/PARP9/PARP14/ERBB4/CLCF1/TNFRSF18/TNFRSF1A/IL20/CRLF1/IL24/IFNL1/LIF/HES1	15
BP	GO:0050830	defense response to Gram-positive bacterium	15|2653	50|14725	0.0266357	0.234037	ENSG00000184678/ENSG00000172936/ENSG00000273802/ENSG00000180596/ENSG00000124635/ENSG00000197903/ENSG00000161031/ENSG00000277224/ENSG00000187796/ENSG00000137462/ENSG00000106538/ENSG00000274290/ENSG00000278588/ENSG00000163218/ENSG00000104312	HIST2H2BE/MYD88/HIST1H2BG/HIST1H2BC/HIST1H2BJ/HIST1H2BK/PGLYRP2/HIST1H2BF/CARD9/TLR2/RARRES2/HIST1H2BE/HIST1H2BI/PGLYRP4/RIPK2	15
BP	GO:0060350	endochondral bone morphogenesis	15|2653	50|14725	0.0266357	0.234037	ENSG00000159167/ENSG00000124813/ENSG00000260428/ENSG00000131759/ENSG00000172819/ENSG00000087460/ENSG00000166886/ENSG00000156103/ENSG00000127948/ENSG00000137745/ENSG00000149257/ENSG00000111199/ENSG00000156427/ENSG00000147408/ENSG00000169231	STC1/RUNX2/SCX/RARA/RARG/GNAS/NAB2/MMP16/POR/MMP13/SERPINH1/TRPV4/FGF18/CSGALNACT1/THBS3	15
BP	GO:0061971	replacement bone morphogenesis	15|2653	50|14725	0.0266357	0.234037	ENSG00000159167/ENSG00000124813/ENSG00000260428/ENSG00000131759/ENSG00000172819/ENSG00000087460/ENSG00000166886/ENSG00000156103/ENSG00000127948/ENSG00000137745/ENSG00000149257/ENSG00000111199/ENSG00000156427/ENSG00000147408/ENSG00000169231	STC1/RUNX2/SCX/RARA/RARG/GNAS/NAB2/MMP16/POR/MMP13/SERPINH1/TRPV4/FGF18/CSGALNACT1/THBS3	15
BP	GO:0071260	cellular response to mechanical stimulus	20|2653	72|14725	0.0268618	0.235163	ENSG00000172936/ENSG00000111321/ENSG00000104689/ENSG00000171522/ENSG00000260428/ENSG00000051523/ENSG00000103335/ENSG00000105695/ENSG00000249242/ENSG00000090020/ENSG00000151929/ENSG00000117394/ENSG00000067182/ENSG00000142208/ENSG00000064666/ENSG00000125347/ENSG00000006062/ENSG00000173402/ENSG00000095015/ENSG00000102882	MYD88/LTBR/TNFRSF10A/PTGER4/SCX/CYBA/PIEZO1/MAG/TMEM150C/SLC9A1/BAG3/SLC2A1/TNFRSF1A/AKT1/CNN2/IRF1/MAP3K14/DAG1/MAP3K1/MAPK3	20
BP	GO:0001942	hair follicle development	22|2653	81|14725	0.0268888	0.235163	ENSG00000107984/ENSG00000062038/ENSG00000164690/ENSG00000092969/ENSG00000073282/ENSG00000115461/ENSG00000128422/ENSG00000130702/ENSG00000197461/ENSG00000123364/ENSG00000120149/ENSG00000087460/ENSG00000167968/ENSG00000102871/ENSG00000137497/ENSG00000075275/ENSG00000148400/ENSG00000109101/ENSG00000197535/ENSG00000122641/ENSG00000163472/ENSG00000124216	DKK1/CDH3/SHH/TGFB2/TP63/IGFBP5/KRT17/LAMA5/PDGFA/HOXC13/MSX2/GNAS/DNASE1L2/TRADD/NUMA1/CELSR1/NOTCH1/FOXN1/MYO5A/INHBA/TMEM79/SNAI1	22
BP	GO:0045069	regulation of viral genome replication	22|2653	81|14725	0.0268888	0.235163	ENSG00000142089/ENSG00000187608/ENSG00000157601/ENSG00000111331/ENSG00000166801/ENSG00000135114/ENSG00000130303/ENSG00000178685/ENSG00000163874/ENSG00000089127/ENSG00000172183/ENSG00000185201/ENSG00000169429/ENSG00000130813/ENSG00000116833/ENSG00000185885/ENSG00000124164/ENSG00000070756/ENSG00000148400/ENSG00000134321/ENSG00000139546/ENSG00000197381	IFITM3/ISG15/MX1/OAS3/FAM111A/OASL/BST2/PARP10/ZC3H12A/OAS1/ISG20/IFITM2/CXCL8/C19orf66/NR5A2/IFITM1/VAPB/PABPC1/NOTCH1/RSAD2/TARBP2/ADARB1	22
BP	GO:0003188	heart valve formation	6|2653	14|14725	0.0273426	0.236563	ENSG00000169242/ENSG00000260428/ENSG00000179588/ENSG00000130558/ENSG00000157554/ENSG00000148400	EFNA1/SCX/ZFPM1/OLFM1/ERG/NOTCH1	6
BP	GO:0003417	growth plate cartilage development	6|2653	14|14725	0.0273426	0.236563	ENSG00000159167/ENSG00000131759/ENSG00000172819/ENSG00000127948/ENSG00000137745/ENSG00000169231	STC1/RARA/RARG/POR/MMP13/THBS3	6
BP	GO:0007567	parturition	6|2653	14|14725	0.0273426	0.236563	ENSG00000182195/ENSG00000078401/ENSG00000140465/ENSG00000123572/ENSG00000185022/ENSG00000105499	LDOC1/EDN1/CYP1A1/NRK/MAFF/PLA2G4C	6
BP	GO:0032274	gonadotropin secretion	6|2653	14|14725	0.0273426	0.236563	ENSG00000163083/ENSG00000136830/ENSG00000123999/ENSG00000170498/ENSG00000122641/ENSG00000135346	INHBB/FAM129B/INHA/KISS1/INHBA/CGA	6
BP	GO:0033540	fatty acid beta-oxidation using acyl-CoA oxidase	6|2653	14|14725	0.0273426	0.236563	ENSG00000153093/ENSG00000060971/ENSG00000101986/ENSG00000087008/ENSG00000161533/ENSG00000101473	ACOXL/ACAA1/ABCD1/ACOX3/ACOX1/ACOT8	6
BP	GO:0034616	response to laminar fluid shear stress	6|2653	14|14725	0.0273426	0.236563	ENSG00000136826/ENSG00000119699/ENSG00000165029/ENSG00000130707/ENSG00000137834/ENSG00000101665	KLF4/TGFB3/ABCA1/ASS1/SMAD6/SMAD7	6
BP	GO:0048711	positive regulation of astrocyte differentiation	6|2653	14|14725	0.0273426	0.236563	ENSG00000175505/ENSG00000105695/ENSG00000146216/ENSG00000148400/ENSG00000128342/ENSG00000114315	CLCF1/MAG/TTBK1/NOTCH1/LIF/HES1	6
BP	GO:0002224	toll-like receptor signaling pathway	30|2653	118|14725	0.0274011	0.236707	ENSG00000091831/ENSG00000189334/ENSG00000172936/ENSG00000263528/ENSG00000163220/ENSG00000100906/ENSG00000125999/ENSG00000051523/ENSG00000255690/ENSG00000143546/ENSG00000105974/ENSG00000169896/ENSG00000162889/ENSG00000137462/ENSG00000023445/ENSG00000127666/ENSG00000131378/ENSG00000137161/ENSG00000110057/ENSG00000168884/ENSG00000125347/ENSG00000134321/ENSG00000126368/ENSG00000150991/ENSG00000269335…	ESR1/S100A14/MYD88/IKBKE/S100A9/NFKBIA/BPIFB1/CYBA/TRIL/S100A8/CAV1/ITGAM/MAPKAPK2/TLR2/BIRC3/TICAM1/RFTN1/CNPY3/UNC93B1/TNIP2/IRF1/RSAD2/NR1D1/UBC/IKBKG/IRF3/DAB2IP/MAP3K1/RIPK2/CTSB	30
[truncated: 6,685 more rows]
