# Supplementary material for: A single cysteine residue in vimentin regulates long non-coding RNA XIST to suppress epithelial–mesenchymal transition and stemness in breast cancer
Source: eLife. 2025 Jul 21;14:RP104191. doi: 10.7554/eLife.104191 (PMC12279371; doi:10.7554/eLife.104191)
Supplement: Figure 3—figure supplement 3—source data 1. [file elife-104191-fig3-figsupp3-data1.xlsx]

## Sheet: C328SVIMvsWT_VIM_down_KEGGenric
Significantly Downregulated Cellular Functions by KEGG Analysis
KEGGID	Description	GeneRatio	BgRatio	pvalue	padj	geneID	geneName	keggID	Count
hsa05322	Systemic lupus erythematosus	54|1478	124|9762	2.33237e-14	7.39362e-12	ENSG00000180573/ENSG00000184678/ENSG00000273802/ENSG00000158373/ENSG00000278828/ENSG00000158406/ENSG00000180596/ENSG00000246705/ENSG00000196787/ENSG00000273983/ENSG00000125730/ENSG00000124635/novel.276/ENSG00000196747/ENSG00000275713/ENSG00000197903/ENSG00000277075/ENSG00000203814/ENSG00000218690/ENSG00000197837/ENSG00000277224/ENSG00000198502/ENSG00000184260/ENSG00000229391/ENSG00000274267/ENSG0…	HIST1H2AC/HIST2H2BE/HIST1H2BG/HIST1H2BD/HIST1H3H/HIST1H4H/HIST1H2BC/H2AFJ/HIST1H2AG/HIST1H3G/C3/HIST1H2BJ/-/HIST1H2AI/HIST1H2BH/HIST1H2BK/HIST1H2AE/HIST2H2BF/HIST1H2APS4/HIST4H4/HIST1H2BF/HLA-DRB5/HIST2H2AC/HLA-DRB6/HIST1H3B/HIST2H3D/HIST1H2AJ/HIST1H4K/HIST1H2APS3/HIST2H4B/HIST2H2AA4/H3F3B/HIST2H2AA3/H3F3C/HIST1H3A/HIST2H2BD/HIST1H2BN/ACTN1/HIST1H2BL/HIST2H2BC/HIST1H2AL/HIST1H2BE/AL031777.3/HIST1…	hsa:8334/hsa:8349/hsa:8343/hsa:3017/hsa:8352/hsa:8370/hsa:8343/hsa:55766/hsa:8336/hsa:8352/hsa:718/hsa:8970/hsa:81/hsa:8336/hsa:8345/hsa:85236/hsa:8335/hsa:440689/hsa:8336/hsa:8370/hsa:8343/hsa:3127/hsa:8338/hsa:3126/hsa:8352/hsa:126961/hsa:8331/hsa:8370/hsa:92815/hsa:8370/hsa:723790/hsa:3020/hsa:723790/hsa:440093/hsa:8352/hsa:8970/hsa:8341/hsa:87/hsa:8340/hsa:8970/hsa:8336/hsa:8343/hsa:8352/hsa:…	54
hsa05034	Alcoholism	72|1478	206|9762	8.98891e-13	1.42474e-10	ENSG00000180573/ENSG00000184678/ENSG00000176884/ENSG00000273802/ENSG00000158373/ENSG00000278828/ENSG00000158406/ENSG00000180596/ENSG00000246705/ENSG00000196787/ENSG00000184845/ENSG00000273983/ENSG00000173175/ENSG00000124635/ENSG00000178372/ENSG00000196747/ENSG00000275713/ENSG00000198246/ENSG00000197903/ENSG00000277075/ENSG00000203814/ENSG00000218690/ENSG00000197837/ENSG00000143578/ENSG00000180176…	HIST1H2AC/HIST2H2BE/GRIN1/HIST1H2BG/HIST1H2BD/HIST1H3H/HIST1H4H/HIST1H2BC/H2AFJ/HIST1H2AG/DRD1/HIST1H3G/ADCY5/HIST1H2BJ/CALML5/HIST1H2AI/HIST1H2BH/SLC29A3/HIST1H2BK/HIST1H2AE/HIST2H2BF/HIST1H2APS4/HIST4H4/CREB3L4/TH/HIST1H2BF/-/HIST2H2AC/GNB5/GNB2/HIST1H3B/GNAS/HIST2H3D/HIST1H2AJ/HIST1H4K/HIST1H2APS3/HIST2H4B/HIST2H2AA4/H3F3B/HIST2H2AA3/H3F3C/GNAI2/HIST1H3A/PPP1CA/HIST2H2BD/HIST1H2BN/CALML6/HIST1…	hsa:8334/hsa:8349/hsa:2902/hsa:8343/hsa:3017/hsa:8352/hsa:8370/hsa:8343/hsa:55766/hsa:8336/hsa:1812/hsa:8352/hsa:111/hsa:8970/hsa:51806/hsa:8336/hsa:8345/hsa:55315/hsa:85236/hsa:8335/hsa:440689/hsa:8336/hsa:8370/hsa:148327/hsa:7054/hsa:8343/hsa:1388/hsa:8338/hsa:10681/hsa:2783/hsa:8352/hsa:2778/hsa:126961/hsa:8331/hsa:8370/hsa:92815/hsa:8370/hsa:723790/hsa:3020/hsa:723790/hsa:440093/hsa:2771/hsa:…	72
hsa04625	C-type lectin receptor signaling pathway	37|1478	112|9762	1.56444e-06	0.000129261	ENSG00000069399/ENSG00000263528/ENSG00000101096/ENSG00000179388/ENSG00000185386/ENSG00000100906/ENSG00000178372/ENSG00000217801/ENSG00000172243/ENSG00000145675/ENSG00000104856/ENSG00000096433/ENSG00000273443/ENSG00000163932/ENSG00000142208/ENSG00000138814/ENSG00000126458/ENSG00000162889/ENSG00000187796/ENSG00000077150/ENSG00000102962/ENSG00000283196/ENSG00000275882/ENSG00000169885/ENSG00000172458…	BCL3/IKBKE/NFATC2/EGR3/MAPK11/NFKBIA/CALML5/AL390719.1/CLEC7A/PIK3R1/RELB/ITPR3/AL645608.9/PRKCD/AKT1/PPP3CA/RRAS/MAPKAPK2/CARD9/NFKB2/CCL22/AC006453.2/IKBKGP1/CALML6/IL17D/IRF1/ITPR1/AC116050.1/MAP3K14/IKBKG/C1orf147/HRAS/AKT2/MAP3K14-AS1/PYCARD/MAPK3/CALM1	hsa:602/hsa:9641/hsa:4773/hsa:1960/hsa:5600/hsa:4792/hsa:51806/hsa:5781/hsa:64581/hsa:5295/hsa:5971/hsa:3710/hsa:5781/hsa:5580/hsa:207/hsa:5530/hsa:6237/hsa:9261/hsa:64170/hsa:4791/hsa:6367/hsa:4046/hsa:8517/hsa:163688/hsa:53342/hsa:3659/hsa:3708/hsa:4046/hsa:9020/hsa:8517/hsa:9641/hsa:3845/hsa:208/hsa:9020/hsa:29108/hsa:5595/hsa:808	37
hsa04360	Axon guidance	58|1478	209|9762	1.63105e-06	0.000129261	ENSG00000198910/ENSG00000164690/ENSG00000198753/ENSG00000107562/ENSG00000138835/ENSG00000124171/ENSG00000169242/ENSG00000001617/ENSG00000173156/ENSG00000164050/ENSG00000101096/ENSG00000102981/ENSG00000075223/ENSG00000099250/ENSG00000172830/ENSG00000146904/ENSG00000112902/ENSG00000217801/ENSG00000101608/ENSG00000101144/ENSG00000196576/ENSG00000118680/ENSG00000162552/ENSG00000196189/ENSG00000185033…	L1CAM/SHH/PLXNB3/CXCL12/RGS3/PARD6B/EFNA1/SEMA3F/RHOD/PLXNB1/NFATC2/PARD6A/SEMA3C/NRP1/SSH3/EPHA1/SEMA5A/AL390719.1/MYL12A/BMP7/PLXNB2/MYL12B/WNT4/SEMA4A/SEMA4B/NTN4/SEMA4C/PIK3R1/RND1/EPHB3/SEMA3B/CXCR4/CAMK2B/ABLIM2/AL645608.9/EFNA4/PPP3CA/RRAS/SLIT1/SRGAP1/SEMA6B/PAK4/EPHA2/PLXNA3/UNC5A/EPHB4/GNAI2/SEMA5B/PLXNA4/EFNA3/PLCG1/TRPC6/LIMK1/HRAS/LRRC4/EFNB2/MAPK3/FES	hsa:3897/hsa:6469/hsa:5365/hsa:6387/hsa:5998/hsa:84612/hsa:1942/hsa:6405/hsa:29984/hsa:5364/hsa:4773/hsa:50855/hsa:10512/hsa:8829/hsa:54961/hsa:2041/hsa:9037/hsa:5781/hsa:10627/hsa:655/hsa:23654/hsa:103910/hsa:54361/hsa:64218/hsa:10509/hsa:59277/hsa:54910/hsa:5295/hsa:27289/hsa:2049/hsa:7869/hsa:7852/hsa:816/hsa:84448/hsa:5781/hsa:1945/hsa:5530/hsa:6237/hsa:6585/hsa:57522/hsa:10501/hsa:10298/hsa:…	58
hsa04142	Lysosome	45|1478	164|9762	3.18656e-05	0.00202028	ENSG00000129354/ENSG00000117984/ENSG00000235027/ENSG00000144455/ENSG00000105929/ENSG00000107331/ENSG00000106367/ENSG00000141337/ENSG00000018280/ENSG00000064601/ENSG00000250644/ENSG00000189067/ENSG00000135404/ENSG00000141012/ENSG00000127415/ENSG00000160766/ENSG00000110719/ENSG00000159720/novel.295/ENSG00000226167/ENSG00000169919/ENSG00000105612/ENSG00000100280/ENSG00000103811/ENSG00000236296/ENSG0…	AP1M2/CTSD/AC068580.3/SUMF1/ATP6V0A4/ABCA2/AP1S1/ARSG/SLC11A1/CTSA/AC068580.4/LITAF/CD63/GALNS/IDUA/GBAP1/TCIRG1/ATP6V0D1/-/AP4B1-AS1/GUSB/DNASE2/AP1B1/CTSH/GUSBP5/ATP6AP1/LAMP1/PLA2G15/GAA/SORT1/SGSH/ASAH1/AP1G2/GNS/AP4B1/PSAP/CLTB/CLTC/AP002807.1/PTRH2/SLC11A2/GLB1/CTSB/AP4M1/ABCB9	hsa:10053/hsa:1509/hsa:1509/hsa:285362/hsa:50617/hsa:20/hsa:1174/hsa:22901/hsa:6556/hsa:5476/hsa:1509/hsa:9516/hsa:967/hsa:2588/hsa:3425/hsa:2629/hsa:10312/hsa:9114/hsa:1508/hsa:10717/hsa:2990/hsa:1777/hsa:162/hsa:1512/hsa:2990/hsa:537/hsa:3916/hsa:23659/hsa:2548/hsa:6272/hsa:6448/hsa:427/hsa:8906/hsa:2799/hsa:10717/hsa:5660/hsa:1212/hsa:1213/hsa:10312/hsa:1213/hsa:4891/hsa:2720/hsa:1508/hsa:9179…	45
hsa01522	Endocrine resistance	31|1478	101|9762	5.49046e-05	0.00256561	ENSG00000091831/ENSG00000124151/ENSG00000100290/ENSG00000124762/ENSG00000185386/ENSG00000173175/ENSG00000170345/ENSG00000110092/ENSG00000164850/ENSG00000145675/ENSG00000108443/ENSG00000074181/ENSG00000142208/ENSG00000100985/ENSG00000087460/ENSG00000111276/ENSG00000101384/ENSG00000184916/ENSG00000140443/ENSG00000148400/ENSG00000162104/ENSG00000174233/ENSG00000128917/ENSG00000177885/ENSG00000160691…	ESR1/NCOA3/BIK/CDKN1A/MAPK11/ADCY5/FOS/CCND1/GPER1/PIK3R1/RPS6KB1/NOTCH3/AKT1/MMP9/GNAS/CDKN1B/JAG1/JAG2/IGF1R/NOTCH1/ADCY9/ADCY6/DLL4/GRB2/SHC1/SLC12A5-AS1/HRAS/AKT2/ARAF/MAPK3/ERBB2	hsa:2099/hsa:8202/hsa:638/hsa:1026/hsa:5600/hsa:111/hsa:2353/hsa:595/hsa:2852/hsa:5295/hsa:6198/hsa:4854/hsa:207/hsa:4318/hsa:2778/hsa:1027/hsa:182/hsa:3714/hsa:3480/hsa:4851/hsa:115/hsa:112/hsa:54567/hsa:2885/hsa:6464/hsa:4318/hsa:3845/hsa:208/hsa:369/hsa:5595/hsa:2064	31
hsa04668	TNF signaling pathway	37|1478	129|9762	5.66538e-05	0.00256561	ENSG00000069399/ENSG00000184557/ENSG00000171223/ENSG00000090339/ENSG00000168404/ENSG00000078401/ENSG00000185386/ENSG00000170345/ENSG00000100906/ENSG00000145675/ENSG00000143578/novel.641/ENSG00000225684/ENSG00000107968/ENSG00000067182/ENSG00000142208/ENSG00000172216/ENSG00000100985/ENSG00000267702/ENSG00000108691/ENSG00000023445/ENSG00000101384/ENSG00000102871/ENSG00000275882/ENSG00000125347/ENSG0…	BCL3/SOCS3/JUNB/ICAM1/MLKL/EDN1/MAPK11/FOS/NFKBIA/PIK3R1/CREB3L4/-/FAM225B/MAP3K8/TNFRSF1A/AKT1/CEBPB/MMP9/AP005131.6/CCL2/BIRC3/JAG1/TRADD/IKBKGP1/IRF1/LIF/RPS6KA4/MAP3K14/IKBKG/DAB2IP/SLC12A5-AS1/AKT2/MAP3K14-AS1/-/CEBPB-AS1/MAPK3/VEGFC	hsa:602/hsa:9021/hsa:3726/hsa:3383/hsa:197259/hsa:1906/hsa:5600/hsa:2353/hsa:4792/hsa:5295/hsa:148327/hsa:1388/hsa:83737/hsa:1326/hsa:7132/hsa:207/hsa:1051/hsa:4318/hsa:83737/hsa:6347/hsa:330/hsa:182/hsa:8717/hsa:8517/hsa:3659/hsa:3976/hsa:8986/hsa:9020/hsa:8517/hsa:153090/hsa:4318/hsa:208/hsa:9020/hsa:6352/hsa:1051/hsa:5595/hsa:7424	37
hsa04657	IL-17 signaling pathway	28|1478	90|9762	9.53374e-05	0.00377775	ENSG00000117983/ENSG00000263528/ENSG00000163220/ENSG00000185386/ENSG00000170345/ENSG00000100906/ENSG00000148346/ENSG00000124391/ENSG00000143546/ENSG00000130522/ENSG00000172216/ENSG00000100985/ENSG00000169429/ENSG00000108691/ENSG00000163702/ENSG00000076604/ENSG00000056972/ENSG00000102871/ENSG00000163701/ENSG00000175592/ENSG00000137745/ENSG00000275882/ENSG00000172458/ENSG00000269335/ENSG00000204044…	MUC5B/IKBKE/S100A9/MAPK11/FOS/NFKBIA/LCN2/IL17C/S100A8/JUND/CEBPB/MMP9/CXCL8/CCL2/IL17RC/TRAF4/TRAF3IP2/TRADD/IL17RE/FOSL1/MMP13/IKBKGP1/IL17D/IKBKG/SLC12A5-AS1/C1orf147/CEBPB-AS1/MAPK3	hsa:727897/hsa:9641/hsa:6280/hsa:5600/hsa:2353/hsa:4792/hsa:3934/hsa:27189/hsa:6279/hsa:3727/hsa:1051/hsa:4318/hsa:3576/hsa:6347/hsa:84818/hsa:9618/hsa:10758/hsa:8717/hsa:132014/hsa:8061/hsa:4322/hsa:8517/hsa:53342/hsa:8517/hsa:4318/hsa:9641/hsa:1051/hsa:5595	28
hsa05205	Proteoglycans in cancer	60|1478	250|9762	0.000130716	0.00460409	ENSG00000137801/ENSG00000091831/ENSG00000065361/ENSG00000188064/ENSG00000111679/ENSG00000164690/ENSG00000026508/ENSG00000178568/ENSG00000124762/ENSG00000185386/ENSG00000124145/ENSG00000092969/ENSG00000115884/ENSG00000110092/ENSG00000217801/ENSG00000162552/ENSG00000150687/ENSG00000145675/ENSG00000090020/ENSG00000108443/ENSG00000058404/ENSG00000105974/ENSG00000096433/ENSG00000273443/ENSG00000142208…	THBS1/ESR1/ERBB3/WNT7B/PTPN6/SHH/CD44/ERBB4/CDKN1A/MAPK11/SDC4/TGFB2/SDC1/CCND1/AL390719.1/WNT4/PRSS23/PIK3R1/SLC9A1/RPS6KB1/CAMK2B/CAV1/ITPR3/AL645608.9/AKT1/RRAS/MMP9/FLNA/PXN/CD63/HSPG2/NUDT16L1/FN1/TLR2/VAV2/PDPK2P/ITGB5/IGF1R/CTTN/ACTBP2/PPP1CA/ACTB/WNT9A/ITPR1/VEGFA/PLCG1/GRB2/FLNB/AC098934.2/SLC12A5-AS1/HRAS/VAV3/AKT2/ARAF/CAV2/ARHGEF1/MAPK3/FZD5/ERBB2/VAV1	hsa:7057/hsa:2099/hsa:2065/hsa:7477/hsa:5777/hsa:6469/hsa:960/hsa:2066/hsa:1026/hsa:5600/hsa:6385/hsa:7042/hsa:6382/hsa:595/hsa:5781/hsa:54361/hsa:8322/hsa:5295/hsa:6548/hsa:6198/hsa:816/hsa:857/hsa:3710/hsa:5781/hsa:207/hsa:6237/hsa:4318/hsa:2316/hsa:5829/hsa:967/hsa:3339/hsa:84309/hsa:2335/hsa:7097/hsa:7410/hsa:5170/hsa:3693/hsa:3480/hsa:2017/hsa:60/hsa:5499/hsa:60/hsa:7483/hsa:3708/hsa:7422/hs…	60
hsa04514	Cell adhesion molecules (CAMs)	39|1478	145|9762	0.000166454	0.00494795	ENSG00000039068/ENSG00000198910/ENSG00000165215/ENSG00000181885/ENSG00000062038/ENSG00000213937/ENSG00000163347/ENSG00000090339/ENSG00000154654/ENSG00000124145/ENSG00000115884/ENSG00000277117/ENSG00000105695/novel.665/ENSG00000012124/ENSG00000091129/ENSG00000134258/novel.685/ENSG00000198502/ENSG00000229391/ENSG00000130202/ENSG00000169896/ENSG00000158769/ENSG00000260577/ENSG00000110400/novel.622/n…	CDH1/L1CAM/CLDN3/CLDN7/CDH3/CLDN9/CLDN1/ICAM1/NCAM2/SDC4/SDC1/FP565260.3/MAG/-/CD22/NRCAM/VTCN1/-/HLA-DRB5/HLA-DRB6/NECTIN2/ITGAM/F11R/AC126773.2/NECTIN1/-/-/-/-/ITGB7/-/CD276/-/PTPRF/CLDN6/LRRC4/GLG1/SELL/CDH5	hsa:999/hsa:3897/hsa:1365/hsa:1366/hsa:1001/hsa:9080/hsa:9076/hsa:3383/hsa:4685/hsa:6385/hsa:6382/hsa:102723996/hsa:4099/hsa:3106/hsa:933/hsa:4897/hsa:79679/hsa:3107/hsa:3127/hsa:3126/hsa:5819/hsa:3684/hsa:50848/hsa:1001/hsa:5818/hsa:3107/hsa:3133/hsa:3107/hsa:3107/hsa:3695/hsa:3106/hsa:80381/hsa:1002/hsa:5792/hsa:9074/hsa:64101/hsa:2734/hsa:6402/hsa:1003	39
hsa04928	Parathyroid hormone synthesis, secretion and action	34|1478	121|9762	0.000173075	0.00494795	ENSG00000107485/ENSG00000124813/ENSG00000109062/ENSG00000124762/ENSG00000173175/ENSG00000170345/ENSG00000198598/ENSG00000186350/ENSG00000143578/novel.641/ENSG00000102996/ENSG00000120738/ENSG00000153234/ENSG00000130522/ENSG00000096433/ENSG00000111424/ENSG00000087460/ENSG00000019186/ENSG00000214077/ENSG00000156103/ENSG00000114353/ENSG00000162337/ENSG00000137745/ENSG00000101333/ENSG00000150995/ENSG0…	GATA3/RUNX2/SLC9A3R1/CDKN1A/ADCY5/FOS/MMP17/RXRA/CREB3L4/-/MMP15/EGR1/NR4A2/JUND/ITPR3/VDR/GNAS/CYP24A1/GNAQP1/MMP16/GNAI2/LRP5/MMP13/PLCB4/ITPR1/ADCY9/ADCY6/ARRB1/NACAP1/ARAF/MAFB/ARHGEF1/MAPK3/SLC34A3	hsa:2625/hsa:860/hsa:9368/hsa:1026/hsa:111/hsa:2353/hsa:4326/hsa:6256/hsa:148327/hsa:1388/hsa:4324/hsa:1958/hsa:4929/hsa:3727/hsa:3710/hsa:7421/hsa:2778/hsa:1591/hsa:2776/hsa:4325/hsa:2771/hsa:4041/hsa:4322/hsa:5332/hsa:3708/hsa:115/hsa:112/hsa:408/hsa:4666/hsa:369/hsa:9935/hsa:9138/hsa:5595/hsa:142680	34
hsa04915	Estrogen signaling pathway	48|1478	191|9762	0.000190801	0.00494795	ENSG00000171345/ENSG00000160182/ENSG00000091831/ENSG00000111057/ENSG00000124151/ENSG00000163235/ENSG00000117984/ENSG00000082175/ENSG00000162989/ENSG00000235027/ENSG00000173175/ENSG00000171346/ENSG00000170345/ENSG00000131759/ENSG00000178372/ENSG00000164850/ENSG00000213943/ENSG00000145675/ENSG00000128422/ENSG00000143578/novel.641/ENSG00000167916/ENSG00000173110/ENSG00000096433/ENSG00000163932/ENSG0…	KRT19/TFF1/ESR1/KRT18/NCOA3/TGFA/CTSD/PGR/KCNJ3/AC068580.3/ADCY5/KRT15/FOS/RARA/CALML5/GPER1/KRT18P17/PIK3R1/KRT17/CREB3L4/-/KRT24/HSPA6/ITPR3/PRKCD/AKT1/KRT13/AC068580.4/MMP9/-/GNAS/KRT16/AC080112.3/GNAQP1/GNAI2/KRT18P29/PLCB4/CALML6/ITPR1/ADCY9/ADCY6/GRB2/SHC1/SLC12A5-AS1/HRAS/AKT2/MAPK3/CALM1	hsa:3880/hsa:7031/hsa:2099/hsa:3875/hsa:8202/hsa:7039/hsa:1509/hsa:5241/hsa:3760/hsa:1509/hsa:111/hsa:3866/hsa:2353/hsa:5914/hsa:51806/hsa:2852/hsa:3875/hsa:5295/hsa:3872/hsa:148327/hsa:1388/hsa:192666/hsa:3310/hsa:3710/hsa:5580/hsa:207/hsa:3860/hsa:1509/hsa:4318/hsa:3303/hsa:2778/hsa:3868/hsa:5914/hsa:2776/hsa:2771/hsa:3875/hsa:5332/hsa:163688/hsa:3708/hsa:115/hsa:112/hsa:2885/hsa:6464/hsa:4318/…	48
hsa05203	Viral carcinogenesis	67|1478	291|9762	0.000202913	0.00494795	ENSG00000006747/ENSG00000184678/ENSG00000273802/ENSG00000158373/ENSG00000111321/ENSG00000158406/ENSG00000124762/ENSG00000180596/ENSG00000179388/ENSG00000100906/ENSG00000125730/ENSG00000124635/ENSG00000067066/ENSG00000110092/novel.276/ENSG00000275713/ENSG00000197903/novel.665/ENSG00000203814/ENSG00000148180/ENSG00000145675/novel.685/ENSG00000197837/ENSG00000143578/ENSG00000277224/ENSG00000126561/n…	SCIN/HIST2H2BE/HIST1H2BG/HIST1H2BD/LTBR/HIST1H4H/CDKN1A/HIST1H2BC/EGR3/NFKBIA/C3/HIST1H2BJ/SP100/CCND1/-/HIST1H2BH/HIST1H2BK/-/HIST2H2BF/GSN/PIK3R1/-/HIST4H4/CREB3L4/HIST1H2BF/STAT5A/-/HPN/-/MAPKAPK2/PXN/-/NFKB2/CDKN1B/HIST1H4K/HIST2H4B/-/TRADD/-/ATP6V0D1/HIST2H2BD/IKBKGP1/HIST1H2BN/CDKN2B/ACTN1/-/-/HIST1H2BL/HIST2H2BC/HIST1H2BE/HDAC11/-/YWHAZP2/HIST1H2BI/IKBKG/HDAC10/HIST1H4I/GRB2/IRF3/YWHAQP6/H…	hsa:85477/hsa:8349/hsa:8343/hsa:3017/hsa:4055/hsa:8370/hsa:1026/hsa:8343/hsa:1960/hsa:4792/hsa:718/hsa:8970/hsa:6672/hsa:595/hsa:81/hsa:8345/hsa:85236/hsa:3106/hsa:440689/hsa:2934/hsa:5295/hsa:3107/hsa:8370/hsa:148327/hsa:8343/hsa:6776/hsa:1388/hsa:3249/hsa:2968/hsa:9261/hsa:5829/hsa:3665/hsa:4791/hsa:1027/hsa:8370/hsa:8370/hsa:3107/hsa:8717/hsa:3133/hsa:9114/hsa:8970/hsa:8517/hsa:8341/hsa:1030/h…	67
hsa05163	Human cytomegalovirus infection	62|1478	266|9762	0.000242945	0.00550096	ENSG00000107562/ENSG00000124762/ENSG00000050628/ENSG00000115594/ENSG00000101096/ENSG00000185386/ENSG00000173175/ENSG00000171522/ENSG00000100906/ENSG00000178372/ENSG00000110092/novel.422/novel.665/ENSG00000164430/ENSG00000145675/novel.685/ENSG00000143578/ENSG00000108443/novel.643/novel.641/ENSG00000121966/ENSG00000069966/ENSG00000096433/ENSG00000015475/ENSG00000067182/ENSG00000142208/ENSG000001388…	CXCL12/CDKN1A/PTGER3/IL1R1/NFATC2/MAPK11/ADCY5/PTGER4/NFKBIA/CALML5/CCND1/-/-/CGAS/PIK3R1/-/CREB3L4/RPS6KB1/-/-/CXCR4/GNB5/ITPR3/BID/TNFRSF1A/AKT1/PPP3CA/CXCL8/PXN/CCL2/GNB2/GNAS/TMEM173/GNAQP1/-/-/CALR4P/-/TRADD/GNAI2/-/BCAR1/PLCB4/IKBKGP1/CALML6/-/ITPR1/-/-/VEGFA/ADCY9/ADCY6/IKBKG/GRB2/IRF3/HRAS/AKT2/-/-/ARHGEF1/MAPK3/CALM1	hsa:6387/hsa:1026/hsa:5733/hsa:3554/hsa:4773/hsa:5600/hsa:111/hsa:5734/hsa:4792/hsa:51806/hsa:595/hsa:9564/hsa:3106/hsa:115004/hsa:5295/hsa:3107/hsa:148327/hsa:6198/hsa:6891/hsa:1388/hsa:7852/hsa:10681/hsa:3710/hsa:637/hsa:7132/hsa:207/hsa:5530/hsa:3576/hsa:5829/hsa:6347/hsa:2783/hsa:2778/hsa:340061/hsa:2776/hsa:567/hsa:6892/hsa:811/hsa:3107/hsa:8717/hsa:2771/hsa:3133/hsa:9564/hsa:5332/hsa:8517/h…	62
hsa05169	Epstein-Barr virus infection	58|1478	247|9762	0.000310521	0.00656235	ENSG00000172936/ENSG00000026508/ENSG00000187608/ENSG00000263528/ENSG00000090339/ENSG00000111331/ENSG00000124762/ENSG00000185386/ENSG00000163636/ENSG00000100906/ENSG00000099860/ENSG00000110092/ENSG00000130222/novel.665/ENSG00000111335/ENSG00000145675/novel.685/ENSG00000089127/ENSG00000198502/novel.643/ENSG00000104856/ENSG00000229391/ENSG00000226332/ENSG00000168032/ENSG00000015475/ENSG00000142208/E…	MYD88/CD44/ISG15/IKBKE/ICAM1/OAS3/CDKN1A/MAPK11/PSMD6/NFKBIA/GADD45B/CCND1/GADD45G/-/OAS2/PIK3R1/-/OAS1/HLA-DRB5/-/RELB/HLA-DRB6/AL354836.1/ENTPD3/BID/AKT1/ENTPD8/-/NFKB2/BLNK/TLR2/CDKN1B/VIM/-/-/CALR4P/-/TRADD/-/IKBKGP1/-/-/PSMC5/-/NCOR2/-/HES1/MAP3K14/ADRM1/IKBKG/IRF3/DDB2/PSMD4/C1orf147/AKT2/NFKBIE/MAP3K14-AS1/-	hsa:4615/hsa:960/hsa:9636/hsa:9641/hsa:3383/hsa:4940/hsa:1026/hsa:5600/hsa:9861/hsa:4792/hsa:4616/hsa:595/hsa:10912/hsa:3106/hsa:4939/hsa:5295/hsa:3107/hsa:4938/hsa:3127/hsa:6891/hsa:5971/hsa:3126/hsa:11047/hsa:956/hsa:637/hsa:207/hsa:377841/hsa:3665/hsa:4791/hsa:29760/hsa:7097/hsa:1027/hsa:7431/hsa:567/hsa:6892/hsa:811/hsa:3107/hsa:8717/hsa:3133/hsa:8517/hsa:4793/hsa:3107/hsa:5705/hsa:3107/hsa:9…	58
hsa05142	Chagas disease (American trypanosomiasis)	28|1478	98|9762	0.000467101	0.00925444	ENSG00000172936/ENSG00000168398/ENSG00000185386/ENSG00000156049/ENSG00000170345/ENSG00000092969/ENSG00000100906/ENSG00000125730/ENSG00000074211/ENSG00000145675/ENSG00000067182/ENSG00000142208/ENSG00000169429/ENSG00000108691/ENSG00000087460/ENSG00000119699/ENSG00000137462/ENSG00000127666/ENSG00000214077/ENSG00000227742/ENSG00000114353/ENSG00000101333/ENSG00000275882/ENSG00000269335/ENSG00000105221…	MYD88/BDKRB2/MAPK11/GNA14/FOS/TGFB2/NFKBIA/C3/PPP2R2C/PIK3R1/TNFRSF1A/AKT1/CXCL8/CCL2/GNAS/TGFB3/TLR2/TICAM1/GNAQP1/CALR4P/GNAI2/PLCB4/IKBKGP1/IKBKG/AKT2/-/MAPK3/SERPINE1	hsa:4615/hsa:624/hsa:5600/hsa:9630/hsa:2353/hsa:7042/hsa:4792/hsa:718/hsa:5522/hsa:5295/hsa:7132/hsa:207/hsa:3576/hsa:6347/hsa:2778/hsa:7043/hsa:7097/hsa:148022/hsa:2776/hsa:811/hsa:2771/hsa:5332/hsa:8517/hsa:8517/hsa:208/hsa:6352/hsa:5595/hsa:5054	28
hsa04935	Growth hormone synthesis, secretion and action	34|1478	128|9762	0.000544688	0.00974443	ENSG00000146674/ENSG00000184557/ENSG00000171223/ENSG00000185386/ENSG00000169047/ENSG00000173175/ENSG00000170345/novel.422/ENSG00000185338/ENSG00000145675/ENSG00000143578/ENSG00000126561/novel.641/ENSG00000096433/ENSG00000142208/ENSG00000087460/ENSG00000214077/ENSG00000099769/ENSG00000114353/ENSG00000050820/ENSG00000101333/ENSG00000150995/ENSG00000124181/ENSG00000162104/ENSG00000174233/ENSG0000023…	IGFBP3/SOCS3/JUNB/MAPK11/IRS1/ADCY5/FOS/-/SOCS1/PIK3R1/CREB3L4/STAT5A/-/ITPR3/AKT1/GNAS/GNAQP1/IGFALS/GNAI2/BCAR1/PLCB4/ITPR1/PLCG1/ADCY9/ADCY6/SOCS2P1/GRB2/SSTR5/CACNA1D/SHC1/HRAS/AKT2/MAP3K1/MAPK3	hsa:3486/hsa:9021/hsa:3726/hsa:5600/hsa:3667/hsa:111/hsa:2353/hsa:9564/hsa:8651/hsa:5295/hsa:148327/hsa:6776/hsa:1388/hsa:3710/hsa:207/hsa:2778/hsa:2776/hsa:3483/hsa:2771/hsa:9564/hsa:5332/hsa:3708/hsa:5335/hsa:115/hsa:112/hsa:8835/hsa:2885/hsa:6755/hsa:776/hsa:6464/hsa:3845/hsa:208/hsa:4214/hsa:5595	34
hsa04217	Necroptosis	54|1478	231|9762	0.000553312	0.00974443	ENSG00000180573/ENSG00000161905/ENSG00000168404/ENSG00000246705/ENSG00000196787/ENSG00000104689/ENSG00000168907/ENSG00000196747/ENSG00000277075/ENSG00000218690/ENSG00000158792/ENSG00000167996/ENSG00000126561/ENSG00000232187/ENSG00000184260/ENSG00000242960/ENSG00000121858/ENSG00000260459/ENSG00000058404/ENSG00000015475/ENSG00000067182/ENSG00000014216/ENSG00000219507/ENSG00000158480/ENSG00000276368…	HIST1H2AC/ALOX15/MLKL/H2AFJ/HIST1H2AG/TNFRSF10A/PLA2G4F/HIST1H2AI/HIST1H2AE/HIST1H2APS4/SPATA2L/FTH1/STAT5A/FTH1P7/HIST2H2AC/FTH1P23/TNFSF10/FTLP14/CAMK2B/BID/TNFRSF1A/CAPN1/FTH1P8/SPATA2/HIST1H2AJ/BIRC3/TICAM1/PPIAP29/RNF31/SLC25A5P5/HIST1H2APS3/-/SLC25A6/HIST2H2AA4/HIST2H2AA3/TRADD/CHMP1A/CHMP1B/HIST1H2AL/PPIAP54/PLA2G4C/H2AFX/HIST3H2A/FTH1P11/SQSTM1/SLC25A5P1/SHARPIN/PYCARD/HIST2H2AB/PYGB/CHMP…	hsa:8334/hsa:246/hsa:197259/hsa:55766/hsa:8336/hsa:8797/hsa:255189/hsa:8336/hsa:8335/hsa:8336/hsa:124044/hsa:2495/hsa:6776/hsa:2495/hsa:8338/hsa:2495/hsa:8743/hsa:2512/hsa:816/hsa:637/hsa:7132/hsa:823/hsa:2495/hsa:9825/hsa:8331/hsa:330/hsa:148022/hsa:5478/hsa:55072/hsa:292/hsa:92815/hsa:8878/hsa:293/hsa:723790/hsa:723790/hsa:8717/hsa:5119/hsa:57132/hsa:8336/hsa:5478/hsa:8605/hsa:3014/hsa:92815/hs…	54
hsa04670	Leukocyte transendothelial migration	39|1478	154|9762	0.000624754	0.0104235	ENSG00000165215/ENSG00000181885/ENSG00000213937/ENSG00000163347/ENSG00000107562/ENSG00000090339/ENSG00000185386/novel.276/ENSG00000217801/ENSG00000101608/novel.422/ENSG00000051523/ENSG00000118680/ENSG00000145675/ENSG00000125753/ENSG00000121966/ENSG00000273443/ENSG00000169896/ENSG00000100985/ENSG00000089159/ENSG00000158769/ENSG00000160293/ENSG00000114353/ENSG00000050820/ENSG00000213763/ENSG0000018…	CLDN3/CLDN7/CLDN9/CLDN1/CXCL12/ICAM1/MAPK11/-/AL390719.1/MYL12A/-/CYBA/MYL12B/PIK3R1/VASP/CXCR4/AL645608.9/ITGAM/MMP9/PXN/F11R/VAV2/GNAI2/BCAR1/ACTBP2/CTNNA3/ARHGAP35/ACTB/ACTN1/RHOH/CTNNA1/PLCG1/AC098934.2/SLC12A5-AS1/CLDN6/VAV3/RAP1AP/VAV1/CDH5	hsa:1365/hsa:1366/hsa:9080/hsa:9076/hsa:6387/hsa:3383/hsa:5600/hsa:81/hsa:5781/hsa:10627/hsa:9564/hsa:1535/hsa:103910/hsa:5295/hsa:7408/hsa:7852/hsa:5781/hsa:3684/hsa:4318/hsa:5829/hsa:50848/hsa:7410/hsa:2771/hsa:9564/hsa:60/hsa:29119/hsa:2909/hsa:60/hsa:87/hsa:399/hsa:1495/hsa:5335/hsa:71/hsa:4318/hsa:9074/hsa:10451/hsa:5906/hsa:7409/hsa:1003	39
hsa04810	Regulation of actin cytoskeleton	61|1478	275|9762	0.00105488	0.0159281	ENSG00000100311/ENSG00000006747/ENSG00000132470/ENSG00000107562/ENSG00000205542/ENSG00000127084/ENSG00000187653/ENSG00000115221/ENSG00000168398/ENSG00000005884/ENSG00000172830/ENSG00000168539/novel.276/ENSG00000101608/novel.422/ENSG00000118680/ENSG00000064547/ENSG00000182957/ENSG00000148180/ENSG00000145675/ENSG00000090020/ENSG00000197461/ENSG00000121966/ENSG00000126458/ENSG00000169896/ENSG0000013…	PDGFB/SCIN/ITGB4/CXCL12/TMSB4X/FGD3/TMSB4XP8/ITGB6/BDKRB2/ITGA3/SSH3/CHRM1/-/MYL12A/-/MYL12B/LPAR2/SPATA13/GSN/PIK3R1/SLC9A1/PDGFA/CXCR4/RRAS/ITGAM/ARPC1B/PXN/MYH9/LPAR5/FN1/MYH14/VAV2/PFN1P1/PAK4/ITGB5/ARPC4/FGF22/BCAR1/ACTBP2/PPP1CA/ARHGAP35/ACTB/PIP4K2C/ACTN1/ITGB7/BRK1/FGF18/ARPC5L/EGF/LIMK1/CYFIP1/AC098934.2/HRAS/VAV3/-/ARAF/ARHGEF1/MAPK3/VAV1/BDKRB1/WASL	hsa:5155/hsa:85477/hsa:3691/hsa:6387/hsa:7114/hsa:89846/hsa:7114/hsa:3694/hsa:624/hsa:3675/hsa:54961/hsa:1128/hsa:81/hsa:10627/hsa:9564/hsa:103910/hsa:9170/hsa:221178/hsa:2934/hsa:5295/hsa:6548/hsa:5154/hsa:7852/hsa:6237/hsa:3684/hsa:10095/hsa:5829/hsa:4627/hsa:57121/hsa:2335/hsa:79784/hsa:7410/hsa:5216/hsa:10298/hsa:3693/hsa:10093/hsa:27006/hsa:9564/hsa:60/hsa:5499/hsa:2909/hsa:60/hsa:79837/hsa:…	61
hsa05164	Influenza A	48|1478	205|9762	0.00105518	0.0159281	ENSG00000184012/ENSG00000172936/ENSG00000115267/ENSG00000184557/ENSG00000263528/ENSG00000090339/ENSG00000157601/ENSG00000111331/ENSG00000104689/ENSG00000100906/ENSG00000111335/ENSG00000137648/ENSG00000145675/ENSG00000089127/ENSG00000198502/ENSG00000229391/ENSG00000121858/ENSG00000015475/ENSG00000067182/ENSG00000142208/ENSG00000169429/ENSG00000196364/ENSG00000108691/novel.340/ENSG00000260284/ENSG0…	TMPRSS2/MYD88/IFIH1/SOCS3/IKBKE/ICAM1/MX1/OAS3/TNFRSF10A/NFKBIA/OAS2/TMPRSS4/PIK3R1/OAS1/HLA-DRB5/HLA-DRB6/TNFSF10/BID/TNFRSF1A/AKT1/CXCL8/PRSS29P/CCL2/-/TPSP2/TRIM25/TICAM1/SLC25A5P5/PABPN1L/SLC25A6/TRADD/ACTBP2/TPSB2/IKBKGP1/ACTB/-/CIITA/RSAD2/IKBKG/IRF3/SLC25A5P1/AC098934.2/C1orf147/AKT2/RAE1/PYCARD/-/MAPK3	hsa:7113/hsa:4615/hsa:64135/hsa:9021/hsa:9641/hsa:3383/hsa:4599/hsa:4940/hsa:8797/hsa:4792/hsa:4939/hsa:56649/hsa:5295/hsa:4938/hsa:3127/hsa:3126/hsa:8743/hsa:637/hsa:7132/hsa:207/hsa:3576/hsa:7177/hsa:6347/hsa:3665/hsa:64499/hsa:7706/hsa:148022/hsa:292/hsa:390748/hsa:293/hsa:8717/hsa:60/hsa:64499/hsa:8517/hsa:60/hsa:4793/hsa:4261/hsa:91543/hsa:8517/hsa:3661/hsa:292/hsa:71/hsa:9641/hsa:208/hsa:84…	48
hsa05202	Transcriptional misregulation in cancer	51|1478	224|9762	0.00145096	0.0202684	ENSG00000166145/ENSG00000184012/ENSG00000146674/ENSG00000176046/ENSG00000278828/ENSG00000124813/ENSG00000124762/ENSG00000173801/ENSG00000273983/ENSG00000131759/ENSG00000125618/ENSG00000099860/ENSG00000130222/ENSG00000186350/ENSG00000113916/ENSG00000007516/ENSG00000157554/ENSG00000144802/ENSG00000197461/ENSG00000172216/ENSG00000169896/ENSG00000244405/ENSG00000100985/ENSG00000169429/ENSG00000274267…	SPINT1/TMPRSS2/IGFBP3/NUPR1/HIST1H3H/RUNX2/CDKN1A/JUP/HIST1H3G/RARA/PAX8/GADD45B/GADD45G/RXRA/BCL6/BAIAP3/ERG/NFKBIZ/PDGFA/CEBPB/ITGAM/ETV5/MMP9/CXCL8/HIST1H3B/AC080112.3/HIST2H3D/MYCN/CDKN1B/BIRC3/PAX5/BCL11B/IGF1R/NGFR/H3F3B/H3F3C/BCL2L1/DDIT3/HIST1H3A/ITGB7/ETV4/JMJD1C-AS1/AL031777.3/HIST1H3E/DDB2/SLC12A5-AS1/TCF3/PER2/ETV7/ZBTB17/CEBPB-AS1	hsa:6692/hsa:7113/hsa:3486/hsa:26471/hsa:8352/hsa:860/hsa:1026/hsa:3728/hsa:8352/hsa:5914/hsa:7849/hsa:4616/hsa:10912/hsa:6256/hsa:604/hsa:8938/hsa:2078/hsa:64332/hsa:5154/hsa:1051/hsa:3684/hsa:2119/hsa:4318/hsa:3576/hsa:8352/hsa:5914/hsa:126961/hsa:4613/hsa:1027/hsa:330/hsa:5079/hsa:64919/hsa:3480/hsa:4804/hsa:3020/hsa:440093/hsa:598/hsa:1649/hsa:8352/hsa:3695/hsa:2118/hsa:221037/hsa:8352/hsa:83…	51
hsa04512	ECM-receptor interaction	26|1478	95|9762	0.00147058	0.0202684	ENSG00000137801/ENSG00000132470/ENSG00000026508/ENSG00000196878/ENSG00000115221/ENSG00000005884/ENSG00000124145/ENSG00000188157/ENSG00000168743/ENSG00000115884/ENSG00000130702/ENSG00000150893/ENSG00000142798/ENSG00000115414/ENSG00000082781/ENSG00000058085/ENSG00000172037/ENSG00000196776/ENSG00000241717/ENSG00000049089/ENSG00000139626/ENSG00000100181/ENSG00000092758/ENSG00000110799/ENSG00000173402…	THBS1/ITGB4/CD44/LAMB3/ITGB6/ITGA3/SDC4/AGRN/NPNT/SDC1/LAMA5/FREM2/HSPG2/FN1/ITGB5/LAMC2/LAMB2/CD47/VWFP1/COL9A2/ITGB7/TPTEP1/COL9A3/VWF/DAG1/THBS3	hsa:7057/hsa:3691/hsa:960/hsa:3914/hsa:3694/hsa:3675/hsa:6385/hsa:375790/hsa:255743/hsa:6382/hsa:3911/hsa:341640/hsa:3339/hsa:2335/hsa:3693/hsa:3918/hsa:3913/hsa:961/hsa:7450/hsa:1298/hsa:3695/hsa:7450/hsa:1299/hsa:7450/hsa:1605/hsa:7059	26
hsa04210	Apoptosis	44|1478	189|9762	0.00188353	0.0230617	ENSG00000117984/ENSG00000235027/ENSG00000104689/ENSG00000170345/ENSG00000100906/ENSG00000099860/ENSG00000130222/ENSG00000214796/ENSG00000160789/ENSG00000145675/ENSG00000121858/ENSG00000096433/ENSG00000015475/ENSG00000127824/ENSG00000067182/ENSG00000142208/ENSG00000250644/ENSG00000014216/ENSG00000105327/ENSG00000242575/ENSG00000023445/ENSG00000205918/ENSG00000102871/novel.295/ENSG00000171552/ENSG0…	CTSD/AC068580.3/TNFRSF10A/FOS/NFKBIA/GADD45B/GADD45G/AC098934.1/LMNA/PIK3R1/TNFSF10/ITPR3/BID/TUBA4A/TNFRSF1A/AKT1/AC068580.4/CAPN1/BBC3/AC012501.2/BIRC3/PDPK2P/TRADD/-/BCL2L1/ACTBP2/DDIT3/IKBKGP1/ACTB/TUBA3E/ITPR1/CTSH/MAP3K14/IKBKG/DAB2IP/ERN1/AC098934.2/HRAS/PARP4/AKT2/MAP3K14-AS1/TUBAL3/MAPK3/CTSB	hsa:1509/hsa:1509/hsa:8797/hsa:2353/hsa:4792/hsa:4616/hsa:10912/hsa:7846/hsa:4000/hsa:5295/hsa:8743/hsa:3710/hsa:637/hsa:7277/hsa:7132/hsa:207/hsa:1509/hsa:823/hsa:27113/hsa:7846/hsa:330/hsa:5170/hsa:8717/hsa:1508/hsa:598/hsa:60/hsa:1649/hsa:8517/hsa:60/hsa:112714/hsa:3708/hsa:1512/hsa:9020/hsa:8517/hsa:153090/hsa:2081/hsa:71/hsa:3845/hsa:143/hsa:208/hsa:9020/hsa:79861/hsa:5595/hsa:1508	44
hsa04662	B cell receptor signaling pathway	23|1478	82|9762	0.00189726	0.0230617	ENSG00000111679/ENSG00000101096/ENSG00000170345/ENSG00000100906/ENSG00000012124/ENSG00000145675/ENSG00000142208/ENSG00000138814/ENSG00000185201/ENSG00000095585/ENSG00000185885/ENSG00000160293/ENSG00000275882/novel.277/ENSG00000070190/ENSG00000269335/ENSG00000177885/ENSG00000174775/ENSG00000134215/ENSG00000105221/ENSG00000146232/ENSG00000102882/ENSG00000141968	PTPN6/NFATC2/FOS/NFKBIA/CD22/PIK3R1/AKT1/PPP3CA/IFITM2/BLNK/IFITM1/VAV2/IKBKGP1/-/DAPP1/IKBKG/GRB2/HRAS/VAV3/AKT2/NFKBIE/MAPK3/VAV1	hsa:5777/hsa:4773/hsa:2353/hsa:4792/hsa:933/hsa:5295/hsa:207/hsa:5530/hsa:8519/hsa:29760/hsa:8519/hsa:7410/hsa:8517/hsa:4793/hsa:27071/hsa:8517/hsa:2885/hsa:3845/hsa:10451/hsa:208/hsa:4794/hsa:5595/hsa:7409	23
hsa04960	Aldosterone-regulated sodium reabsorption	14|1478	41|9762	0.00196846	0.0230617	ENSG00000111319/ENSG00000175793/ENSG00000169047/ENSG00000065054/ENSG00000145675/ENSG00000143153/ENSG00000168447/ENSG00000166828/ENSG00000203865/ENSG00000205918/ENSG00000176387/ENSG00000049759/ENSG00000174775/ENSG00000102882	SCNN1A/SFN/IRS1/SLC9A3R2/PIK3R1/ATP1B1/SCNN1B/SCNN1G/ATP1A1-AS1/PDPK2P/HSD11B2/NEDD4L/HRAS/MAPK3	hsa:6337/hsa:2810/hsa:3667/hsa:9351/hsa:5295/hsa:481/hsa:6338/hsa:6340/hsa:476/hsa:5170/hsa:3291/hsa:23327/hsa:3845/hsa:5595	14
hsa04062	Chemokine signaling pathway	42|1478	179|9762	0.00201606	0.0230617	ENSG00000124126/ENSG00000107562/ENSG00000173175/ENSG00000100906/novel.422/ENSG00000145675/ENSG00000161921/ENSG00000121966/ENSG00000069966/ENSG00000126353/ENSG00000163932/ENSG00000142208/ENSG00000169429/ENSG00000089159/ENSG00000108691/ENSG00000172354/ENSG00000015285/ENSG00000102962/ENSG00000160293/ENSG00000151882/ENSG00000101336/ENSG00000114353/ENSG00000050820/ENSG00000134516/ENSG00000006606/ENSG0…	PREX1/CXCL12/ADCY5/NFKBIA/-/PIK3R1/CXCL16/CXCR4/GNB5/CCR7/PRKCD/AKT1/CXCL8/PXN/CCL2/GNB2/WAS/CCL22/VAV2/CCL28/HCK/GNAI2/BCAR1/DOCK2/CCL26/PLCB4/IKBKGP1/-/ADCY9/ADCY6/GRK2/ARRB1/IKBKG/GRB2/SHC1/HRAS/VAV3/AKT2/-/RAP1AP/MAPK3/VAV1	hsa:57580/hsa:6387/hsa:111/hsa:4792/hsa:9564/hsa:5295/hsa:58191/hsa:7852/hsa:10681/hsa:1236/hsa:5580/hsa:207/hsa:3576/hsa:5829/hsa:6347/hsa:2783/hsa:7454/hsa:6367/hsa:7410/hsa:56477/hsa:3055/hsa:2771/hsa:9564/hsa:1794/hsa:10344/hsa:5332/hsa:8517/hsa:4793/hsa:115/hsa:112/hsa:156/hsa:408/hsa:8517/hsa:2885/hsa:6464/hsa:3845/hsa:10451/hsa:208/hsa:6352/hsa:5906/hsa:5595/hsa:7409	42
hsa04380	Osteoclast differentiation	31|1478	122|9762	0.002037	0.0230617	ENSG00000184557/ENSG00000171223/ENSG00000075426/ENSG00000115594/ENSG00000101096/ENSG00000185386/ENSG00000170345/ENSG00000092969/ENSG00000100906/ENSG00000051523/ENSG00000185338/ENSG00000145675/ENSG00000033327/ENSG00000104856/ENSG00000130522/ENSG00000067182/ENSG00000142208/ENSG00000138814/ENSG00000077150/ENSG00000095585/novel.287/ENSG00000164761/ENSG00000175592/ENSG00000275882/ENSG00000006062/ENSG0…	SOCS3/JUNB/FOSL2/IL1R1/NFATC2/MAPK11/FOS/TGFB2/NFKBIA/CYBA/SOCS1/PIK3R1/GAB2/RELB/JUND/TNFRSF1A/AKT1/PPP3CA/NFKB2/BLNK/-/TNFRSF11B/FOSL1/IKBKGP1/MAP3K14/IKBKG/GRB2/SQSTM1/AKT2/MAP3K14-AS1/MAPK3	hsa:9021/hsa:3726/hsa:2355/hsa:3554/hsa:4773/hsa:5600/hsa:2353/hsa:7042/hsa:4792/hsa:1535/hsa:8651/hsa:5295/hsa:9846/hsa:5971/hsa:3727/hsa:7132/hsa:207/hsa:5530/hsa:4791/hsa:29760/hsa:8878/hsa:4982/hsa:8061/hsa:8517/hsa:9020/hsa:8517/hsa:2885/hsa:8878/hsa:208/hsa:9020/hsa:5595	31
hsa04510	Focal adhesion	57|1478	261|9762	0.00220536	0.0241068	ENSG00000137801/ENSG00000100311/ENSG00000132470/ENSG00000196878/ENSG00000115221/ENSG00000005884/ENSG00000110092/novel.276/ENSG00000101608/novel.422/ENSG00000118680/ENSG00000145675/ENSG00000130702/ENSG00000197461/ENSG00000125753/ENSG00000105974/ENSG00000142208/ENSG00000196924/ENSG00000089159/ENSG00000115414/ENSG00000023445/ENSG00000160293/ENSG00000205918/ENSG00000130669/ENSG00000082781/ENSG0000014…	THBS1/PDGFB/ITGB4/LAMB3/ITGB6/ITGA3/CCND1/-/MYL12A/-/MYL12B/PIK3R1/LAMA5/PDGFA/VASP/CAV1/AKT1/FLNA/PXN/FN1/BIRC3/VAV2/PDPK2P/PAK4/ITGB5/IGF1R/LAMC2/LAMB2/BCAR1/ACTBP2/PPP1CA/VWFP1/COL9A2/ARHGAP35/ACTB/PARVA/ACTN1/ITGB7/VEGFA/EGF/TPTEP1/COL9A3/ZYX/VWF/GRB2/FLNB/SHC1/AC098934.2/VAV3/AKT2/CAV2/RAP1AP/MAPK3/THBS3/ERBB2/VAV1/VEGFC	hsa:7057/hsa:5155/hsa:3691/hsa:3914/hsa:3694/hsa:3675/hsa:595/hsa:81/hsa:10627/hsa:9564/hsa:103910/hsa:5295/hsa:3911/hsa:5154/hsa:7408/hsa:857/hsa:207/hsa:2316/hsa:5829/hsa:2335/hsa:330/hsa:7410/hsa:5170/hsa:10298/hsa:3693/hsa:3480/hsa:3918/hsa:3913/hsa:9564/hsa:60/hsa:5499/hsa:7450/hsa:1298/hsa:2909/hsa:60/hsa:55742/hsa:87/hsa:3695/hsa:7422/hsa:1950/hsa:7450/hsa:1299/hsa:7791/hsa:7450/hsa:2885/h…	57
hsa05224	Breast cancer	38|1478	159|9762	0.00228203	0.0241135	ENSG00000091831/ENSG00000188064/ENSG00000124151/ENSG00000124762/ENSG00000082175/ENSG00000170345/ENSG00000099860/ENSG00000110092/ENSG00000130222/ENSG00000162552/ENSG00000150687/ENSG00000145675/ENSG00000108443/ENSG00000074181/ENSG00000142208/ENSG00000077150/ENSG00000101384/ENSG00000184916/ENSG00000140443/ENSG00000070388/ENSG00000162337/ENSG00000148400/ENSG00000165879/ENSG00000143816/ENSG00000114315…	ESR1/WNT7B/NCOA3/CDKN1A/PGR/FOS/GADD45B/CCND1/GADD45G/WNT4/PRSS23/PIK3R1/RPS6KB1/NOTCH3/AKT1/NFKB2/JAG1/JAG2/IGF1R/FGF22/LRP5/NOTCH1/FRAT1/WNT9A/HES1/FGF18/EGF/DLL4/GRB2/DDB2/SHC1/HRAS/AKT2/ARAF/MAPK3/DVL3/FZD5/ERBB2	hsa:2099/hsa:7477/hsa:8202/hsa:1026/hsa:5241/hsa:2353/hsa:4616/hsa:595/hsa:10912/hsa:54361/hsa:8322/hsa:5295/hsa:6198/hsa:4854/hsa:207/hsa:4791/hsa:182/hsa:3714/hsa:3480/hsa:27006/hsa:4041/hsa:4851/hsa:10023/hsa:7483/hsa:3280/hsa:8817/hsa:1950/hsa:54567/hsa:2885/hsa:1643/hsa:6464/hsa:3845/hsa:208/hsa:369/hsa:5595/hsa:1857/hsa:7855/hsa:2064	38
hsa04530	Tight junction	46|1478	202|9762	0.00240768	0.0246204	ENSG00000165215/ENSG00000181885/ENSG00000105289/ENSG00000213937/ENSG00000140832/ENSG00000163347/ENSG00000073350/ENSG00000130545/ENSG00000124171/ENSG00000109062/ENSG00000102981/ENSG00000110092/novel.276/ENSG00000101608/ENSG00000171992/ENSG00000118680/ENSG00000074211/ENSG00000214796/ENSG00000164877/ENSG00000143375/ENSG00000125753/ENSG00000106526/ENSG00000114019/ENSG00000127824/ENSG00000158769/ENSG0…	CLDN3/CLDN7/TJP3/CLDN9/MARVELD3/CLDN1/LLGL2/CRB3/PARD6B/SLC9A3R1/PARD6A/CCND1/-/MYL12A/SYNPO/MYL12B/PPP2R2C/AC098934.1/MICALL2/CGN/VASP/ACTR3C/AMOTL2/TUBA4A/F11R/MYH9/WAS/AC012501.2/MYH14/MYL6/CTTN/MARVELD2/ACTBP2/ACTB/IGSF5/ACTN1/TUBA3E/TJP2/CACNA1D/NEDD4L/AC098934.2/CLDN6/TUBAL3/MAP3K1/RAP1AP/ERBB2	hsa:1365/hsa:1366/hsa:27134/hsa:9080/hsa:91862/hsa:9076/hsa:3993/hsa:92359/hsa:84612/hsa:9368/hsa:50855/hsa:595/hsa:81/hsa:10627/hsa:11346/hsa:103910/hsa:5522/hsa:7846/hsa:79778/hsa:57530/hsa:7408/hsa:653857/hsa:51421/hsa:7277/hsa:50848/hsa:4627/hsa:7454/hsa:7846/hsa:79784/hsa:4637/hsa:2017/hsa:153562/hsa:60/hsa:60/hsa:150084/hsa:87/hsa:112714/hsa:9414/hsa:776/hsa:23327/hsa:71/hsa:9074/hsa:79861/…	46
hsa04929	GnRH secretion	21|1478	74|9762	0.00250826	0.0246574	ENSG00000162989/ENSG00000196557/ENSG00000104783/ENSG00000164850/ENSG00000145675/ENSG00000099822/ENSG00000096433/ENSG00000142208/ENSG00000080709/ENSG00000100346/ENSG00000170498/ENSG00000214077/ENSG00000101333/ENSG00000150995/ENSG00000137486/ENSG00000187486/ENSG00000157388/ENSG00000174775/ENSG00000105221/ENSG00000102882/ENSG00000135346	KCNJ3/CACNA1H/KCNN4/GPER1/PIK3R1/HCN2/ITPR3/AKT1/KCNN2/CACNA1I/KISS1/GNAQP1/PLCB4/ITPR1/ARRB1/KCNJ11/CACNA1D/HRAS/AKT2/MAPK3/CGA	hsa:3760/hsa:8912/hsa:3783/hsa:2852/hsa:5295/hsa:610/hsa:3710/hsa:207/hsa:3781/hsa:8911/hsa:3814/hsa:2776/hsa:5332/hsa:3708/hsa:408/hsa:3767/hsa:776/hsa:3845/hsa:208/hsa:5595/hsa:1081	21
hsa05226	Gastric cancer	38|1478	160|9762	0.00256686	0.0246574	ENSG00000039068/ENSG00000188064/ENSG00000076242/ENSG00000164690/ENSG00000124762/ENSG00000173801/ENSG00000092969/ENSG00000099860/ENSG00000110092/ENSG00000130222/ENSG00000162552/ENSG00000186350/ENSG00000150687/ENSG00000145675/ENSG00000108443/ENSG00000142208/ENSG00000119699/ENSG00000111276/ENSG00000166949/ENSG00000070388/ENSG00000162337/ENSG00000183230/ENSG00000147883/ENSG00000165879/ENSG00000143816…	CDH1/WNT7B/MLH1/SHH/CDKN1A/JUP/TGFB2/GADD45B/CCND1/GADD45G/WNT4/RXRA/PRSS23/PIK3R1/RPS6KB1/AKT1/TGFB3/CDKN1B/SMAD3/FGF22/LRP5/CTNNA3/CDKN2B/FRAT1/WNT9A/CTNNA1/FGF18/EGF/GRB2/DDB2/SHC1/HRAS/AKT2/ARAF/MAPK3/DVL3/FZD5/ERBB2	hsa:999/hsa:7477/hsa:4292/hsa:6469/hsa:1026/hsa:3728/hsa:7042/hsa:4616/hsa:595/hsa:10912/hsa:54361/hsa:6256/hsa:8322/hsa:5295/hsa:6198/hsa:207/hsa:7043/hsa:1027/hsa:4088/hsa:27006/hsa:4041/hsa:29119/hsa:1030/hsa:10023/hsa:7483/hsa:1495/hsa:8817/hsa:1950/hsa:2885/hsa:1643/hsa:6464/hsa:3845/hsa:208/hsa:369/hsa:5595/hsa:1857/hsa:7855/hsa:2064	38
hsa04010	MAPK signaling pathway	73|1478	353|9762	0.00271796	0.0251191	ENSG00000065361/ENSG00000075461/ENSG00000100311/ENSG00000172936/ENSG00000163235/ENSG00000169242/ENSG00000106211/ENSG00000178568/ENSG00000158050/ENSG00000115594/ENSG00000185386/ENSG00000120875/ENSG00000170345/ENSG00000196557/ENSG00000092969/ENSG00000168907/ENSG00000099860/ENSG00000167535/ENSG00000130222/ENSG00000197461/ENSG00000104856/ENSG00000173110/ENSG00000107968/ENSG00000130522/ENSG00000243364…	ERBB3/CACNG4/PDGFB/MYD88/TGFA/EFNA1/HSPB1/ERBB4/DUSP2/IL1R1/MAPK11/DUSP4/FOS/CACNA1H/TGFB2/PLA2G4F/GADD45B/CACNB3/GADD45G/PDGFA/RELB/HSPA6/MAP3K8/JUND/EFNA4/TNFRSF1A/AKT1/PPP3CA/RRAS/AREG/FLNA/-/CACNA1I/MAPKAPK2/NFKB2/TGFB3/EPHA2/IGF1R/HSPB1P1/FGF22/NGFR/TRADD/DDIT3/TAOK3/IKBKGP1/RASGRP1/MAP3K11/EFNA3/VEGFA/CDC25B/RPS6KA4/MAP3K14/FGF18/ARRB1/PLA2G4C/EGF/IKBKG/CACNG1/GRB2/FLNB/CACNA1D/HRAS/GSN-AS1…	hsa:2065/hsa:27092/hsa:5155/hsa:4615/hsa:7039/hsa:1942/hsa:3315/hsa:2066/hsa:1844/hsa:3554/hsa:5600/hsa:1846/hsa:2353/hsa:8912/hsa:7042/hsa:255189/hsa:4616/hsa:784/hsa:10912/hsa:5154/hsa:5971/hsa:3310/hsa:1326/hsa:3727/hsa:1945/hsa:7132/hsa:207/hsa:5530/hsa:6237/hsa:374/hsa:2316/hsa:3303/hsa:8911/hsa:9261/hsa:4791/hsa:7043/hsa:1969/hsa:3480/hsa:3315/hsa:27006/hsa:4804/hsa:8717/hsa:1649/hsa:51347/…	73
hsa04750	Inflammatory mediator regulation of TRP channels	27|1478	104|9762	0.0027734	0.0251191	ENSG00000175591/ENSG00000115594/ENSG00000168398/ENSG00000185386/ENSG00000173175/ENSG00000171522/ENSG00000168907/ENSG00000178372/ENSG00000145675/ENSG00000058404/ENSG00000096433/ENSG00000163932/ENSG00000087460/ENSG00000214077/ENSG00000172531/ENSG00000027075/ENSG00000101333/ENSG00000169885/ENSG00000150995/ENSG00000124181/ENSG00000111199/ENSG00000162104/ENSG00000174233/ENSG00000105499/ENSG00000100739…	P2RY2/IL1R1/BDKRB2/MAPK11/ADCY5/PTGER4/PLA2G4F/CALML5/PIK3R1/CAMK2B/ITPR3/PRKCD/GNAS/GNAQP1/PPP1CA/PRKCH/PLCB4/CALML6/ITPR1/PLCG1/TRPV4/ADCY9/ADCY6/PLA2G4C/BDKRB1/TRPV3/CALM1	hsa:5029/hsa:3554/hsa:624/hsa:5600/hsa:111/hsa:5734/hsa:255189/hsa:51806/hsa:5295/hsa:816/hsa:3710/hsa:5580/hsa:2778/hsa:2776/hsa:5499/hsa:5583/hsa:5332/hsa:163688/hsa:3708/hsa:5335/hsa:59341/hsa:115/hsa:112/hsa:8605/hsa:623/hsa:162514/hsa:808	27
hsa05130	Pathogenic Escherichia coli infection	60|1478	281|9762	0.00296813	0.026136	ENSG00000165215/ENSG00000181885/ENSG00000172936/ENSG00000111679/ENSG00000213937/ENSG00000163347/ENSG00000109062/ENSG00000115594/ENSG00000185386/ENSG00000167306/ENSG00000104689/ENSG00000128833/ENSG00000170345/ENSG00000100906/ENSG00000217801/ENSG00000064547/ENSG00000214796/ENSG00000258947/ENSG00000121858/ENSG00000273443/ENSG00000127824/ENSG00000067182/ENSG00000130429/ENSG00000169429/ENSG00000100345…	CLDN3/CLDN7/MYD88/PTPN6/CLDN9/CLDN1/SLC9A3R1/IL1R1/MAPK11/MYO5B/TNFRSF10A/MYO5C/FOS/NFKBIA/AL390719.1/LPAR2/AC098934.1/TUBB3/TNFSF10/AL645608.9/TUBA4A/TNFRSF1A/ARPC1B/CXCL8/MYH9/AC012501.2/LPAR5/MYH14/TUBB8/MYO6/ARPC4/CYTH2/TRADD/CERNA1/CTTN/ACTBP2/IKBKGP1/MYO1C/ACTB/-/TUBA3E/BRK1/MYO1B/ARPC5L/IKBKG/MYO5A/TMBIM6/CYFIP1/AC098934.2/CLDN6/-/TUBBP2/PYCARD/TUBB4B/TUBB1/CASP4/TUBAL3/ARHGEF1/MAPK3/WASL	hsa:1365/hsa:1366/hsa:4615/hsa:5777/hsa:9080/hsa:9076/hsa:9368/hsa:3554/hsa:5600/hsa:4645/hsa:8797/hsa:55930/hsa:2353/hsa:4792/hsa:5781/hsa:9170/hsa:7846/hsa:10381/hsa:8743/hsa:5781/hsa:7277/hsa:7132/hsa:10095/hsa:3576/hsa:4627/hsa:7846/hsa:57121/hsa:79784/hsa:347688/hsa:4646/hsa:10093/hsa:9266/hsa:8717/hsa:55930/hsa:2017/hsa:60/hsa:8517/hsa:4641/hsa:60/hsa:4793/hsa:112714/hsa:55845/hsa:4430/hsa:…	60
hsa04933	AGE-RAGE signaling pathway in diabetic complications	27|1478	105|9762	0.00320753	0.0268437	ENSG00000090339/ENSG00000178726/ENSG00000168542/ENSG00000078401/ENSG00000185386/ENSG00000092969/ENSG00000110092/ENSG00000145675/ENSG00000126561/ENSG00000120738/ENSG00000163932/ENSG00000142208/ENSG00000169429/ENSG00000108691/ENSG00000119699/ENSG00000115414/ENSG00000111276/ENSG00000166949/ENSG00000161714/ENSG00000101333/ENSG00000112715/ENSG00000124181/ENSG00000174775/ENSG00000105221/ENSG00000102882…	ICAM1/THBD/COL3A1/EDN1/MAPK11/TGFB2/CCND1/PIK3R1/STAT5A/EGR1/PRKCD/AKT1/CXCL8/CCL2/TGFB3/FN1/CDKN1B/SMAD3/PLCD3/PLCB4/VEGFA/PLCG1/HRAS/AKT2/MAPK3/SERPINE1/VEGFC	hsa:3383/hsa:7056/hsa:1281/hsa:1906/hsa:5600/hsa:7042/hsa:595/hsa:5295/hsa:6776/hsa:1958/hsa:5580/hsa:207/hsa:3576/hsa:6347/hsa:7043/hsa:2335/hsa:1027/hsa:4088/hsa:113026/hsa:5332/hsa:7422/hsa:5335/hsa:3845/hsa:208/hsa:5595/hsa:5054/hsa:7424	27
hsa04660	T cell receptor signaling pathway	26|1478	100|9762	0.00321785	0.0268437	ENSG00000111679/ENSG00000101096/ENSG00000185386/ENSG00000170345/ENSG00000100906/ENSG00000145675/ENSG00000107968/ENSG00000142208/ENSG00000138814/ENSG00000160293/ENSG00000205918/ENSG00000130669/ENSG00000275882/novel.277/ENSG00000172575/ENSG00000124181/ENSG00000006062/ENSG00000269335/ENSG00000177885/ENSG00000174775/ENSG00000134215/ENSG00000105221/ENSG00000146232/ENSG00000267278/ENSG00000102882/ENSG0…	PTPN6/NFATC2/MAPK11/FOS/NFKBIA/PIK3R1/MAP3K8/AKT1/PPP3CA/VAV2/PDPK2P/PAK4/IKBKGP1/-/RASGRP1/PLCG1/MAP3K14/IKBKG/GRB2/HRAS/VAV3/AKT2/NFKBIE/MAP3K14-AS1/MAPK3/VAV1	hsa:5777/hsa:4773/hsa:5600/hsa:2353/hsa:4792/hsa:5295/hsa:1326/hsa:207/hsa:5530/hsa:7410/hsa:5170/hsa:10298/hsa:8517/hsa:4793/hsa:10125/hsa:5335/hsa:9020/hsa:8517/hsa:2885/hsa:3845/hsa:10451/hsa:208/hsa:4794/hsa:9020/hsa:5595/hsa:7409	26
hsa05165	Human papillomavirus infection	79|1478	390|9762	0.0033326	0.0270881	ENSG00000137801/ENSG00000188064/ENSG00000132470/ENSG00000187608/ENSG00000073350/ENSG00000263528/ENSG00000130545/ENSG00000196878/ENSG00000124171/ENSG00000157601/ENSG00000109062/ENSG00000135114/ENSG00000124762/ENSG00000115221/ENSG00000106003/ENSG00000005884/ENSG00000102981/ENSG00000171522/ENSG00000110092/ENSG00000162552/ENSG00000150687/novel.665/ENSG00000074211/ENSG00000145675/novel.685/ENSG0000010…	THBS1/WNT7B/ITGB4/ISG15/LLGL2/IKBKE/CRB3/LAMB3/PARD6B/MX1/SLC9A3R1/OASL/CDKN1A/ITGB6/LFNG/ITGA3/PARD6A/PTGER4/CCND1/WNT4/PRSS23/-/PPP2R2C/PIK3R1/-/ATP6V0A4/CREB3L4/LAMA5/RPS6KB1/HES2/NOTCH3/TNFRSF1A/AKT1/PXN/GNAS/FN1/CDKN1B/TICAM1/JAG1/ITGB5/LAMC2/TCIRG1/LAMB2/-/TRADD/-/ATP6V0D1/VWFP1/COL9A2/ATP6V0E1/NOTCH1/IKBKGP1/-/WNT9A/IRF1/-/ITGB7/-/VEGFA/ATP6AP1/HES1/TADA3/EGF/IKBKG/TPTEP1/COL9A3/VWF/GRB2/I…	hsa:7057/hsa:7477/hsa:3691/hsa:9636/hsa:3993/hsa:9641/hsa:92359/hsa:3914/hsa:84612/hsa:4599/hsa:9368/hsa:8638/hsa:1026/hsa:3694/hsa:3955/hsa:3675/hsa:50855/hsa:5734/hsa:595/hsa:54361/hsa:8322/hsa:3106/hsa:5522/hsa:5295/hsa:3107/hsa:50617/hsa:148327/hsa:3911/hsa:6198/hsa:54626/hsa:4854/hsa:7132/hsa:207/hsa:5829/hsa:2778/hsa:2335/hsa:1027/hsa:148022/hsa:182/hsa:3693/hsa:3918/hsa:10312/hsa:3913/hsa:…	79
hsa04650	Natural killer cell mediated cytotoxicity	31|1478	127|9762	0.00395121	0.0313133	ENSG00000111679/ENSG00000090339/novel.649/ENSG00000101096/ENSG00000104689/ENSG00000217801/novel.665/ENSG00000145675/novel.685/ENSG00000121858/ENSG00000273443/ENSG00000015475/ENSG00000138814/ENSG00000155918/ENSG00000160293/novel.622/novel.605/ENSG00000087266/ENSG00000111981/novel.614/novel.663/novel.675/novel.686/ENSG00000124181/ENSG00000177885/ENSG00000160691/ENSG00000174775/ENSG00000134215/ENSG0…	PTPN6/ICAM1/-/NFATC2/TNFRSF10A/AL390719.1/-/PIK3R1/-/TNFSF10/AL645608.9/BID/PPP3CA/RAET1L/VAV2/-/-/SH3BP2/ULBP1/-/-/-/-/PLCG1/GRB2/SHC1/HRAS/VAV3/ARAF/MAPK3/VAV1	hsa:5777/hsa:3383/hsa:100507436/hsa:4773/hsa:8797/hsa:5781/hsa:3106/hsa:5295/hsa:3107/hsa:8743/hsa:5781/hsa:637/hsa:5530/hsa:154064/hsa:7410/hsa:3107/hsa:3133/hsa:6452/hsa:80329/hsa:3107/hsa:3107/hsa:100507436/hsa:3106/hsa:5335/hsa:2885/hsa:6464/hsa:3845/hsa:10451/hsa:369/hsa:5595/hsa:7409	31
hsa05170	Human immunodeficiency virus 1 infection	56|1478	263|9762	0.00426948	0.0330104	ENSG00000129354/ENSG00000172936/ENSG00000101096/ENSG00000185386/ENSG00000130303/ENSG00000170345/ENSG00000100906/ENSG00000178372/novel.665/ENSG00000164430/ENSG00000145675/novel.685/ENSG00000108443/novel.643/ENSG00000106367/ENSG00000132256/ENSG00000179750/ENSG00000121966/ENSG00000069966/ENSG00000096433/ENSG00000015475/ENSG00000067182/ENSG00000142208/ENSG00000138814/ENSG00000089159/ENSG00000172354/E…	AP1M2/MYD88/NFATC2/MAPK11/BST2/FOS/NFKBIA/CALML5/-/CGAS/PIK3R1/-/RPS6KB1/-/AP1S1/TRIM5/APOBEC3B/CXCR4/GNB5/ITPR3/BID/TNFRSF1A/AKT1/PPP3CA/PXN/GNB2/TMEM173/TLR2/PAK4/GNAQP1/-/-/CALR4P/-/TRADD/GNAI2/-/BCL2L1/IKBKGP1/CALML6/-/ITPR1/-/AP1B1/-/PLCG1/IKBKG/LIMK1/IRF3/ELOB/AP1G2/HRAS/AKT2/-/MAPK3/CALM1	hsa:10053/hsa:4615/hsa:4773/hsa:5600/hsa:684/hsa:2353/hsa:4792/hsa:51806/hsa:3106/hsa:115004/hsa:5295/hsa:3107/hsa:6198/hsa:6891/hsa:1174/hsa:85363/hsa:9582/hsa:7852/hsa:10681/hsa:3710/hsa:637/hsa:7132/hsa:207/hsa:5530/hsa:5829/hsa:2783/hsa:340061/hsa:7097/hsa:10298/hsa:2776/hsa:567/hsa:6892/hsa:811/hsa:3107/hsa:8717/hsa:2771/hsa:3133/hsa:598/hsa:8517/hsa:163688/hsa:3107/hsa:3708/hsa:3107/hsa:162…	56
hsa05219	Bladder cancer	15|1478	49|9762	0.0045844	0.0346013	ENSG00000039068/ENSG00000137801/ENSG00000124762/ENSG00000100373/ENSG00000110092/ENSG00000100985/ENSG00000169429/ENSG00000112715/ENSG00000035664/ENSG00000138798/ENSG00000204044/ENSG00000174775/ENSG00000078061/ENSG00000102882/ENSG00000141736	CDH1/THBS1/CDKN1A/UPK3A/CCND1/MMP9/CXCL8/VEGFA/DAPK2/EGF/SLC12A5-AS1/HRAS/ARAF/MAPK3/ERBB2	hsa:999/hsa:7057/hsa:1026/hsa:7380/hsa:595/hsa:4318/hsa:3576/hsa:7422/hsa:23604/hsa:1950/hsa:4318/hsa:3845/hsa:369/hsa:5595/hsa:2064	15
hsa04015	Rap1 signaling pathway	54|1478	253|9762	0.00470652	0.0346969	ENSG00000039068/ENSG00000137801/ENSG00000100311/ENSG00000176884/ENSG00000124171/ENSG00000169242/ENSG00000125968/ENSG00000185386/ENSG00000102981/ENSG00000173175/ENSG00000178372/novel.422/ENSG00000064547/ENSG00000145675/ENSG00000197461/ENSG00000125753/ENSG00000076864/ENSG00000243364/ENSG00000142208/ENSG00000126458/ENSG00000169896/ENSG00000087460/ENSG00000184574/ENSG00000160293/ENSG00000233328/ENSG0…	CDH1/THBS1/PDGFB/GRIN1/PARD6B/EFNA1/ID1/MAPK11/PARD6A/ADCY5/CALML5/-/LPAR2/PIK3R1/PDGFA/VASP/RAP1GAP/EFNA4/AKT1/RRAS/ITGAM/GNAS/LPAR5/VAV2/PFN1P1/EPHA2/GNAQP1/IGF1R/FGF22/NGFR/GNAI2/BCAR1/ACTBP2/PLCB4/ACTB/CALML6/SIPA1L3/EFNA3/VEGFA/PLCG1/ADCY9/ADCY6/FGF18/EGF/PRKD2/AC098934.2/HRAS/VAV3/AKT2/RAP1AP/MAPK3/VAV1/VEGFC/CALM1	hsa:999/hsa:7057/hsa:5155/hsa:2902/hsa:84612/hsa:1942/hsa:3397/hsa:5600/hsa:50855/hsa:111/hsa:51806/hsa:9564/hsa:9170/hsa:5295/hsa:5154/hsa:7408/hsa:5909/hsa:1945/hsa:207/hsa:6237/hsa:3684/hsa:2778/hsa:57121/hsa:7410/hsa:5216/hsa:1969/hsa:2776/hsa:3480/hsa:27006/hsa:4804/hsa:2771/hsa:9564/hsa:60/hsa:5332/hsa:60/hsa:163688/hsa:23094/hsa:1944/hsa:7422/hsa:5335/hsa:115/hsa:112/hsa:8817/hsa:1950/hsa:…	54
hsa04713	Circadian entrainment	25|1478	98|9762	0.00499214	0.0359661	ENSG00000176884/ENSG00000108551/ENSG00000162989/ENSG00000173175/ENSG00000170345/ENSG00000196557/ENSG00000178372/ENSG00000069966/ENSG00000058404/ENSG00000096433/ENSG00000100346/ENSG00000172354/ENSG00000087460/ENSG00000214077/ENSG00000114353/ENSG00000198929/ENSG00000101333/ENSG00000169885/ENSG00000150995/ENSG00000162104/ENSG00000174233/ENSG00000157388/ENSG00000132326/ENSG00000102882/ENSG00000198668	GRIN1/RASD1/KCNJ3/ADCY5/FOS/CACNA1H/CALML5/GNB5/CAMK2B/ITPR3/CACNA1I/GNB2/GNAS/GNAQP1/GNAI2/NOS1AP/PLCB4/CALML6/ITPR1/ADCY9/ADCY6/CACNA1D/PER2/MAPK3/CALM1	hsa:2902/hsa:51655/hsa:3760/hsa:111/hsa:2353/hsa:8912/hsa:51806/hsa:10681/hsa:816/hsa:3710/hsa:8911/hsa:2783/hsa:2778/hsa:2776/hsa:2771/hsa:9722/hsa:5332/hsa:163688/hsa:3708/hsa:115/hsa:112/hsa:776/hsa:8864/hsa:5595/hsa:808	25
hsa05418	Fluid shear stress and atherosclerosis	43|1478	194|9762	0.00549148	0.0380151	ENSG00000181019/ENSG00000100311/ENSG00000090339/ENSG00000178726/ENSG00000115594/novel.537/ENSG00000078401/ENSG00000185386/ENSG00000124145/ENSG00000170345/ENSG00000115884/ENSG00000168765/ENSG00000178372/ENSG00000051523/ENSG00000231240/ENSG00000134184/ENSG00000145675/ENSG00000197461/ENSG00000105974/ENSG00000067182/ENSG00000142208/ENSG00000100985/ENSG00000108691/ENSG00000134202/ENSG00000241720/ENSG0…	NQO1/PDGFB/ICAM1/THBD/IL1R1/-/EDN1/MAPK11/SDC4/FOS/SDC1/GSTM4/CALML5/CYBA/KLF2P1/GSTM1/PIK3R1/PDGFA/CAV1/TNFRSF1A/AKT1/MMP9/CCL2/GSTM3/AL158847.1/ASS1/-/AC087311.1/SUMO3/ACTBP2/IKBKGP1/ACTB/CALML6/VEGFA/TRPV4/IKBKG/SQSTM1/AC098934.2/SLC12A5-AS1/AKT2/CAV2/CALM1/CDH5	hsa:1728/hsa:5155/hsa:3383/hsa:7056/hsa:3554/hsa:2952/hsa:1906/hsa:5600/hsa:6385/hsa:2353/hsa:6382/hsa:2946/hsa:51806/hsa:1535/hsa:10365/hsa:2944/hsa:5295/hsa:5154/hsa:857/hsa:7132/hsa:207/hsa:4318/hsa:6347/hsa:2947/hsa:2947/hsa:445/hsa:8878/hsa:445/hsa:6612/hsa:60/hsa:8517/hsa:60/hsa:163688/hsa:7422/hsa:59341/hsa:8517/hsa:8878/hsa:71/hsa:4318/hsa:208/hsa:858/hsa:808/hsa:1003	43
hsa04218	Cellular senescence	47|1478	216|9762	0.00551638	0.0380151	ENSG00000146674/ENSG00000124762/ENSG00000101096/ENSG00000185386/ENSG00000092969/ENSG00000178372/ENSG00000099860/ENSG00000110092/ENSG00000130222/novel.665/ENSG00000145675/ENSG00000163349/novel.685/ENSG00000152518/ENSG00000096433/ENSG00000185650/ENSG00000142208/ENSG00000138814/ENSG00000126458/ENSG00000014216/ENSG00000169429/ENSG00000162889/ENSG00000119699/ENSG00000056972/ENSG00000166949/ENSG0000022…	IGFBP3/CDKN1A/NFATC2/MAPK11/TGFB2/CALML5/GADD45B/CCND1/GADD45G/-/PIK3R1/HIPK1/-/ZFP36L2/ITPR3/ZFP36L1/AKT1/PPP3CA/RRAS/CAPN1/CXCL8/MAPKAPK2/TGFB3/TRAF3IP2/SMAD3/SLC25A5P5/-/SLC25A6/-/-/PPP1CA/CDKN2B/CALML6/-/ITPR1/-/-/TRPV4/SQSTM1/SLC25A5P1/CACNA1D/HRAS/MYBL2/AKT2/MAPK3/SERPINE1/CALM1	hsa:3486/hsa:1026/hsa:4773/hsa:5600/hsa:7042/hsa:51806/hsa:4616/hsa:595/hsa:10912/hsa:3106/hsa:5295/hsa:204851/hsa:3107/hsa:678/hsa:3710/hsa:677/hsa:207/hsa:5530/hsa:6237/hsa:823/hsa:3576/hsa:9261/hsa:7043/hsa:10758/hsa:4088/hsa:292/hsa:8878/hsa:293/hsa:3107/hsa:3133/hsa:5499/hsa:1030/hsa:163688/hsa:3107/hsa:3708/hsa:3107/hsa:3106/hsa:59341/hsa:8878/hsa:292/hsa:776/hsa:3845/hsa:4605/hsa:208/hsa:5…	47
hsa05152	Tuberculosis	42|1478	189|9762	0.00573901	0.0387078	ENSG00000172936/ENSG00000117984/ENSG00000185386/ENSG00000235027/ENSG00000092969/ENSG00000125730/ENSG00000178372/ENSG00000153246/ENSG00000102879/ENSG00000172243/ENSG00000105929/ENSG00000198502/ENSG00000229391/ENSG00000058404/ENSG00000015475/ENSG00000067182/ENSG00000142208/ENSG00000250644/ENSG00000138814/ENSG00000172216/ENSG00000169896/ENSG00000251348/ENSG00000111424/ENSG00000187796/ENSG00000119699…	MYD88/CTSD/MAPK11/AC068580.3/TGFB2/C3/CALML5/PLA2R1/CORO1A/CLEC7A/ATP6V0A4/HLA-DRB5/HLA-DRB6/CAMK2B/BID/TNFRSF1A/AKT1/AC068580.4/PPP3CA/CEBPB/ITGAM/HSPD1P11/VDR/CARD9/TGFB3/TLR2/TCIRG1/TRADD/ATP6V0D1/AC006453.2/CALML6/CIITA/RAB5B/ATP6AP1/AC116050.1/LAMP1/AKT2/AP002807.1/CEBPB-AS1/MAPK3/RIPK2/CALM1	hsa:4615/hsa:1509/hsa:5600/hsa:1509/hsa:7042/hsa:718/hsa:51806/hsa:22925/hsa:11151/hsa:64581/hsa:50617/hsa:3127/hsa:3126/hsa:816/hsa:637/hsa:7132/hsa:207/hsa:1509/hsa:5530/hsa:1051/hsa:3684/hsa:3329/hsa:7421/hsa:64170/hsa:7043/hsa:7097/hsa:10312/hsa:8717/hsa:9114/hsa:4046/hsa:163688/hsa:4261/hsa:5869/hsa:537/hsa:4046/hsa:3916/hsa:208/hsa:10312/hsa:1051/hsa:5595/hsa:8767/hsa:808	42
hsa04145	Phagosome	45|1478	206|9762	0.00605381	0.0399804	ENSG00000137801/ENSG00000125730/ENSG00000153246/ENSG00000051523/novel.665/ENSG00000102879/ENSG00000214796/ENSG00000172243/novel.685/ENSG00000105929/ENSG00000198502/novel.643/ENSG00000258947/ENSG00000229391/ENSG00000127824/ENSG00000169896/ENSG00000242575/ENSG00000137462/ENSG00000261456/ENSG00000082781/ENSG00000227742/ENSG00000110719/novel.622/novel.605/ENSG00000159720/ENSG00000213763/ENSG000001137…	THBS1/C3/PLA2R1/CYBA/-/CORO1A/AC098934.1/CLEC7A/-/ATP6V0A4/HLA-DRB5/-/TUBB3/HLA-DRB6/TUBA4A/ITGAM/AC012501.2/TLR2/TUBB8/ITGB5/CALR4P/TCIRG1/-/-/ATP6V0D1/ACTBP2/ATP6V0E1/ACTB/-/TUBA3E/-/-/RAB5B/ATP6AP1/LAMP1/AC098934.2/SCARB1/-/AP002807.1/TUBBP2/TUBB4B/-/TUBB1/TUBAL3/THBS3	hsa:7057/hsa:718/hsa:22925/hsa:1535/hsa:3106/hsa:11151/hsa:7846/hsa:64581/hsa:3107/hsa:50617/hsa:3127/hsa:6891/hsa:10381/hsa:3126/hsa:7277/hsa:3684/hsa:7846/hsa:7097/hsa:347688/hsa:3693/hsa:811/hsa:10312/hsa:3107/hsa:3133/hsa:9114/hsa:60/hsa:8992/hsa:60/hsa:3107/hsa:112714/hsa:3107/hsa:3106/hsa:5869/hsa:537/hsa:3916/hsa:71/hsa:949/hsa:6891/hsa:10312/hsa:203068/hsa:10383/hsa:83547/hsa:81027/hsa:79…	45
hsa04540	Gap junction	26|1478	105|9762	0.00646849	0.0418472	ENSG00000100311/ENSG00000184845/ENSG00000173175/ENSG00000214796/ENSG00000197461/ENSG00000258947/ENSG00000096433/ENSG00000127824/ENSG00000087460/ENSG00000242575/ENSG00000261456/ENSG00000214077/ENSG00000114353/ENSG00000101333/ENSG00000152086/ENSG00000150995/ENSG00000162104/ENSG00000174233/ENSG00000138798/ENSG00000177885/ENSG00000174775/ENSG00000214222/ENSG00000188229/ENSG00000101162/ENSG00000178462…	PDGFB/DRD1/ADCY5/AC098934.1/PDGFA/TUBB3/ITPR3/TUBA4A/GNAS/AC012501.2/TUBB8/GNAQP1/GNAI2/PLCB4/TUBA3E/ITPR1/ADCY9/ADCY6/EGF/GRB2/HRAS/TUBBP2/TUBB4B/TUBB1/TUBAL3/MAPK3	hsa:5155/hsa:1812/hsa:111/hsa:7846/hsa:5154/hsa:10381/hsa:3710/hsa:7277/hsa:2778/hsa:7846/hsa:347688/hsa:2776/hsa:2771/hsa:5332/hsa:112714/hsa:3708/hsa:115/hsa:112/hsa:1950/hsa:2885/hsa:3845/hsa:203068/hsa:10383/hsa:81027/hsa:79861/hsa:5595	26
hsa04611	Platelet activation	33|1478	143|9762	0.00750429	0.0475772	ENSG00000118640/ENSG00000168542/ENSG00000185386/ENSG00000173175/ENSG00000095303/ENSG00000168907/ENSG00000101608/ENSG00000118680/ENSG00000145675/ENSG00000125753/ENSG00000096433/ENSG00000142208/ENSG00000087460/ENSG00000214077/ENSG00000114353/ENSG00000213763/ENSG00000172531/ENSG00000241717/ENSG00000160007/ENSG00000101333/ENSG00000075624/ENSG00000150995/ENSG00000172575/ENSG00000162104/ENSG00000174233…	VAMP8/COL3A1/MAPK11/ADCY5/PTGS1/PLA2G4F/MYL12A/MYL12B/PIK3R1/VASP/ITPR3/AKT1/GNAS/GNAQP1/GNAI2/ACTBP2/PPP1CA/VWFP1/ARHGAP35/PLCB4/ACTB/ITPR1/RASGRP1/ADCY9/ADCY6/PLA2G4C/TPTEP1/VWF/AC098934.2/AKT2/ARHGEF1/RAP1AP/MAPK3	hsa:8673/hsa:1281/hsa:5600/hsa:111/hsa:5742/hsa:255189/hsa:10627/hsa:103910/hsa:5295/hsa:7408/hsa:3710/hsa:207/hsa:2778/hsa:2776/hsa:2771/hsa:60/hsa:5499/hsa:7450/hsa:2909/hsa:5332/hsa:60/hsa:3708/hsa:10125/hsa:115/hsa:112/hsa:8605/hsa:7450/hsa:7450/hsa:71/hsa:208/hsa:9138/hsa:5906/hsa:5595	33
hsa05214	Glioma	23|1478	91|9762	0.00777355	0.0483179	ENSG00000100311/ENSG00000163235/ENSG00000124762/ENSG00000178372/ENSG00000099860/ENSG00000110092/ENSG00000130222/ENSG00000145675/ENSG00000197461/ENSG00000058404/ENSG00000142208/ENSG00000140443/ENSG00000169885/ENSG00000124181/ENSG00000138798/ENSG00000177885/ENSG00000134574/ENSG00000160691/ENSG00000174775/ENSG00000105221/ENSG00000078061/ENSG00000102882/ENSG00000198668	PDGFB/TGFA/CDKN1A/CALML5/GADD45B/CCND1/GADD45G/PIK3R1/PDGFA/CAMK2B/AKT1/IGF1R/CALML6/PLCG1/EGF/GRB2/DDB2/SHC1/HRAS/AKT2/ARAF/MAPK3/CALM1	hsa:5155/hsa:7039/hsa:1026/hsa:51806/hsa:4616/hsa:595/hsa:10912/hsa:5295/hsa:5154/hsa:816/hsa:207/hsa:3480/hsa:163688/hsa:5335/hsa:1950/hsa:2885/hsa:1643/hsa:6464/hsa:3845/hsa:208/hsa:369/hsa:5595/hsa:808	23
