# Supplementary material for: A single cysteine residue in vimentin regulates long non-coding RNA XIST to suppress epithelial–mesenchymal transition and stemness in breast cancer
Source: eLife. 2025 Jul 21;14:RP104191. doi: 10.7554/eLife.104191 (PMC12279371; doi:10.7554/eLife.104191)
Supplement: Figure 3—figure supplement 3—source data 2. [file elife-104191-fig3-figsupp3-data2.xlsx]

## Sheet: C328SVIMvsWT_VIM_up_KEGGenrich_
Significantly Upregulated Cellular Functions by KEGG Analysis
KEGGID	Description	GeneRatio	BgRatio	pvalue	padj	geneID	geneName	keggID	Count
hsa04727	GABAergic synapse	26|1115	87|9762	2.46162e-06	0.000777871	ENSG00000114450/ENSG00000127955/ENSG00000087258/ENSG00000148408/ENSG00000166501/ENSG00000132164/ENSG00000011677/ENSG00000127920/ENSG00000186469/ENSG00000111664/ENSG00000102287/ENSG00000010379/ENSG00000115896/ENSG00000139112/ENSG00000168243/ENSG00000188338/ENSG00000176533/ENSG00000157103/ENSG00000260075/ENSG00000136750/ENSG00000111886/ENSG00000172380/ENSG00000142875/ENSG00000151067/ENSG00000154229…	GNB4/GNAI1/GNAO1/CACNA1B/PRKCB/SLC6A11/GABRA3/GNG11/GNG2/GNB3/GABRE/SLC6A13/PLCL1/GABARAPL1/GNG4/SLC38A3/GNG7/SLC6A1/NSFP1/GAD2/GABRR2/GNG12/PRKACB/CACNA1C/PRKCA/KCNJ6	hsa:59345/hsa:2770/hsa:2775/hsa:774/hsa:5579/hsa:6538/hsa:2556/hsa:2791/hsa:54331/hsa:2784/hsa:2564/hsa:6540/hsa:5334/hsa:23710/hsa:2786/hsa:10991/hsa:2788/hsa:6529/hsa:4905/hsa:2572/hsa:2570/hsa:55970/hsa:5567/hsa:775/hsa:5578/hsa:3763	26
hsa04512	ECM-receptor interaction	26|1115	95|9762	1.44922e-05	0.00157565	ENSG00000159164/ENSG00000134871/ENSG00000050555/ENSG00000213949/ENSG00000197565/ENSG00000091136/ENSG00000101680/ENSG00000187498/ENSG00000115232/ENSG00000112769/ENSG00000188153/ENSG00000077943/ENSG00000139219/ENSG00000144668/ENSG00000196569/ENSG00000105664/ENSG00000113296/ENSG00000142156/ENSG00000091409/ENSG00000041982/ENSG00000161638/ENSG00000235438/ENSG00000053747/ENSG00000072571/ENSG00000172752…	SV2A/COL4A2/LAMC3/ITGA1/COL4A6/LAMB1/LAMA1/COL4A1/ITGA4/LAMA4/COL4A5/ITGA8/COL2A1/ITGA9/LAMA2/COMP/THBS4/COL6A1/ITGA6/TNC/ITGA5/ESRRAP2/LAMA3/HMMR/COL6A5/GP1BA	hsa:9900/hsa:1284/hsa:10319/hsa:3672/hsa:1288/hsa:3912/hsa:284217/hsa:1282/hsa:3676/hsa:3910/hsa:1287/hsa:8516/hsa:1280/hsa:3680/hsa:3908/hsa:1311/hsa:7060/hsa:1291/hsa:3655/hsa:3371/hsa:3678/hsa:341640/hsa:3909/hsa:3161/hsa:256076/hsa:2811	26
hsa05032	Morphine addiction	23|1115	79|9762	1.49587e-05	0.00157565	ENSG00000114450/ENSG00000127955/ENSG00000087258/ENSG00000148408/ENSG00000166501/ENSG00000011677/ENSG00000127920/ENSG00000186469/ENSG00000111664/ENSG00000102287/ENSG00000198873/ENSG00000168243/ENSG00000100077/ENSG00000176533/ENSG00000184588/ENSG00000113231/ENSG00000128655/ENSG00000111886/ENSG00000172380/ENSG00000142875/ENSG00000154229/ENSG00000157542/ENSG00000123360	GNB4/GNAI1/GNAO1/CACNA1B/PRKCB/GABRA3/GNG11/GNG2/GNB3/GABRE/GRK5/GNG4/GRK3/GNG7/PDE4B/PDE8B/PDE11A/GABRR2/GNG12/PRKACB/PRKCA/KCNJ6/PDE1B	hsa:59345/hsa:2770/hsa:2775/hsa:774/hsa:5579/hsa:2556/hsa:2791/hsa:54331/hsa:2784/hsa:2564/hsa:2869/hsa:2786/hsa:157/hsa:2788/hsa:5142/hsa:8622/hsa:50940/hsa:2570/hsa:55970/hsa:5567/hsa:5578/hsa:3763/hsa:5153	23
hsa04725	Cholinergic synapse	29|1115	115|9762	2.62678e-05	0.00207516	ENSG00000146592/ENSG00000114450/ENSG00000127955/ENSG00000184185/ENSG00000010810/ENSG00000087258/ENSG00000152495/ENSG00000185760/ENSG00000148408/ENSG00000166501/ENSG00000127920/ENSG00000186469/ENSG00000075043/ENSG00000111664/ENSG00000117020/novel.519/ENSG00000101204/ENSG00000168243/novel.503/ENSG00000176533/ENSG00000175344/ENSG00000080644/ENSG00000172380/ENSG00000142875/ENSG00000151067/novel.387/E…	CREB5/GNB4/GNAI1/KCNJ12/FYN/GNAO1/CAMK4/KCNQ5/CACNA1B/PRKCB/GNG11/GNG2/KCNQ2/GNB3/AKT3/-/CHRNA4/GNG4/-/GNG7/CHRNA7/CHRNA3/GNG12/PRKACB/CACNA1C/-/PRKCA/KCNJ6/KCNQ1	hsa:9586/hsa:59345/hsa:2770/hsa:3768/hsa:2534/hsa:2775/hsa:814/hsa:56479/hsa:774/hsa:5579/hsa:2791/hsa:54331/hsa:3785/hsa:2784/hsa:10000/hsa:3785/hsa:1137/hsa:2786/hsa:10000/hsa:2788/hsa:1139/hsa:1136/hsa:55970/hsa:5567/hsa:775/hsa:1139/hsa:5578/hsa:3763/hsa:3784	29
hsa05412	Arrhythmogenic right ventricular cardiomyopathy (ARVC)	28|1115	111|9762	3.57786e-05	0.00226121	ENSG00000152661/ENSG00000170558/ENSG00000213949/ENSG00000101680/ENSG00000138795/ENSG00000115232/ENSG00000182389/ENSG00000153956/ENSG00000183023/ENSG00000081059/ENSG00000077522/ENSG00000198947/ENSG00000077943/ENSG00000258441/ENSG00000144668/ENSG00000196569/ENSG00000157445/ENSG00000142408/ENSG00000165995/ENSG00000100678/ENSG00000046604/ENSG00000134755/ENSG00000091409/ENSG00000161638/ENSG00000007402…	GJA1/CDH2/ITGA1/LAMA1/LEF1/ITGA4/CACNB4/CACNA2D1/SLC8A1/TCF7/ACTN2/DMD/ITGA8/LINC00641/ITGA9/LAMA2/CACNA2D3/CACNG8/CACNB2/SLC8A3/DSG2/DSC2/ITGA6/ITGA5/CACNA2D2/CACNA1C/AC023347.1/SGCB	hsa:2697/hsa:1000/hsa:3672/hsa:284217/hsa:51176/hsa:3676/hsa:785/hsa:781/hsa:6546/hsa:6932/hsa:88/hsa:1756/hsa:8516/hsa:5318/hsa:3680/hsa:3908/hsa:55799/hsa:59283/hsa:783/hsa:6547/hsa:1829/hsa:1824/hsa:3655/hsa:3678/hsa:9254/hsa:775/hsa:5318/hsa:6443	28
hsa04514	Cell adhesion molecules (CAMs)	32|1115	145|9762	0.000167413	0.00881708	ENSG00000170558/ENSG00000166086/ENSG00000149294/ENSG00000177707/ENSG00000204525/ENSG00000038427/ENSG00000234745/ENSG00000131409/ENSG00000115232/ENSG00000018236/ENSG00000169760/ENSG00000077943/ENSG00000173482/ENSG00000101017/ENSG00000110076/ENSG00000144668/ENSG00000196338/novel.625/ENSG00000163531/ENSG00000154721/ENSG00000021645/novel.594/ENSG00000091409/ENSG00000150637/ENSG00000066405/ENSG0000017…	CDH2/JAM3/NCAM1/NECTIN3/HLA-C/VCAN/HLA-B/LRRC4B/ITGA4/CNTN1/NLGN1/ITGA8/PTPRM/CD40/NRXN2/ITGA9/NLGN3/-/NFASC/JAM2/NRXN3/-/ITGA6/CD226/CLDN18/CD34/CADM1/CLDN2/SELPLG/CLDN10/CD4/CNTNAP1	hsa:1000/hsa:83700/hsa:4684/hsa:25945/hsa:3107/hsa:1462/hsa:3106/hsa:94030/hsa:3676/hsa:1272/hsa:22871/hsa:8516/hsa:5797/hsa:958/hsa:9379/hsa:3680/hsa:54413/hsa:3133/hsa:23114/hsa:58494/hsa:9379/hsa:3107/hsa:3655/hsa:10666/hsa:51208/hsa:947/hsa:23705/hsa:9075/hsa:6404/hsa:9071/hsa:920/hsa:8506	32
hsa04974	Protein digestion and absorption	22|1115	87|9762	0.000229938	0.00987885	ENSG00000134871/ENSG00000197565/ENSG00000187955/ENSG00000187498/ENSG00000112394/ENSG00000183023/ENSG00000197467/ENSG00000188153/ENSG00000204262/ENSG00000196549/ENSG00000180773/ENSG00000129244/ENSG00000139219/ENSG00000171502/ENSG00000106688/ENSG00000142156/ENSG00000100678/ENSG00000196739/ENSG00000137509/ENSG00000172752/ENSG00000053918/ENSG00000124749	COL4A2/COL4A6/COL14A1/COL4A1/SLC16A10/SLC8A1/COL13A1/COL4A5/COL5A2/MME/SLC36A4/ATP1B2/COL2A1/COL24A1/SLC1A1/COL6A1/SLC8A3/COL27A1/PRCP/COL6A5/KCNQ1/COL21A1	hsa:1284/hsa:1288/hsa:7373/hsa:1282/hsa:117247/hsa:6546/hsa:1305/hsa:1287/hsa:1290/hsa:4311/hsa:120103/hsa:482/hsa:1280/hsa:255631/hsa:6505/hsa:1291/hsa:6547/hsa:85301/hsa:5547/hsa:256076/hsa:3784/hsa:81578	22
hsa05033	Nicotine addiction	9|1115	21|9762	0.00026184	0.00987885	ENSG00000148408/ENSG00000011677/ENSG00000102287/ENSG00000101204/ENSG00000175344/ENSG00000198785/ENSG00000111886/ENSG00000152578/novel.387	CACNA1B/GABRA3/GABRE/CHRNA4/CHRNA7/GRIN3A/GABRR2/GRIA4/-	hsa:774/hsa:2556/hsa:2564/hsa:1137/hsa:1139/hsa:116443/hsa:2570/hsa:2893/hsa:1139	9
hsa04510	Focal adhesion	49|1115	261|9762	0.00028136	0.00987885	ENSG00000134871/ENSG00000128591/ENSG00000050555/ENSG00000118971/ENSG00000213949/ENSG00000197565/ENSG00000091136/ENSG00000162909/ENSG00000037280/ENSG00000101680/ENSG00000187498/ENSG00000010810/ENSG00000102755/ENSG00000115232/ENSG00000166501/ENSG00000119630/ENSG00000112769/ENSG00000188153/ENSG00000188677/ENSG00000077943/ENSG00000139219/ENSG00000144668/ENSG00000196569/ENSG00000117020/ENSG00000149269…	COL4A2/FLNC/LAMC3/CCND2/ITGA1/COL4A6/LAMB1/CAPN2/FLT4/LAMA1/COL4A1/FYN/FLT1/ITGA4/PRKCB/PGF/LAMA4/COL4A5/PARVB/ITGA8/COL2A1/ITGA9/LAMA2/AKT3/PAK1/COMP/THBS4/PAK3/-/CAV3/COL6A1/PDGFRA/PTENP1/ITGA6/PDGFC/VEGFD/TNC/ITGA5/EGFR/LAMA3/PDGFRB/COL6A5/MYLK/RASGRF1/VCL/PRKCA/DOCK1/PPP1CC/JUN	hsa:1284/hsa:2318/hsa:10319/hsa:894/hsa:3672/hsa:1288/hsa:3912/hsa:824/hsa:2324/hsa:284217/hsa:1282/hsa:2534/hsa:2321/hsa:3676/hsa:5579/hsa:5228/hsa:3910/hsa:1287/hsa:29780/hsa:8516/hsa:1280/hsa:3680/hsa:3908/hsa:10000/hsa:5058/hsa:1311/hsa:7060/hsa:5063/hsa:10000/hsa:859/hsa:1291/hsa:5156/hsa:5728/hsa:3655/hsa:56034/hsa:2277/hsa:3371/hsa:3678/hsa:1956/hsa:3909/hsa:5159/hsa:256076/hsa:4638/hsa:59…	49
hsa04726	Serotonergic synapse	26|1115	113|9762	0.000334622	0.0105741	ENSG00000114450/ENSG00000127955/ENSG00000087258/ENSG00000148408/ENSG00000166501/ENSG00000127920/ENSG00000108576/ENSG00000116711/ENSG00000186469/ENSG00000111664/ENSG00000168243/ENSG00000144935/ENSG00000147246/ENSG00000186377/ENSG00000073756/ENSG00000176533/ENSG00000129167/ENSG00000138109/ENSG00000172380/ENSG00000142875/ENSG00000151067/ENSG00000277879/ENSG00000154229/ENSG00000158748/ENSG00000157542…	GNB4/GNAI1/GNAO1/CACNA1B/PRKCB/GNG11/SLC6A4/PLA2G4A/GNG2/GNB3/GNG4/TRPC1/HTR2C/CYP4X1/PTGS2/GNG7/TPH1/CYP2C9/GNG12/PRKACB/CACNA1C/AL391988.1/PRKCA/HTR6/KCNJ6/ALOX15B	hsa:59345/hsa:2770/hsa:2775/hsa:774/hsa:5579/hsa:2791/hsa:6532/hsa:5321/hsa:54331/hsa:2784/hsa:2786/hsa:7220/hsa:3358/hsa:260293/hsa:5743/hsa:2788/hsa:7166/hsa:1559/hsa:55970/hsa:5567/hsa:775/hsa:6571/hsa:5578/hsa:3362/hsa:3763/hsa:247	26
hsa04340	Hedgehog signaling pathway	17|1115	63|9762	0.00051378	0.0147595	ENSG00000118971/ENSG00000128602/ENSG00000074047/ENSG00000180447/ENSG00000072840/ENSG00000143147/ENSG00000185920/ENSG00000117425/ENSG00000064309/ENSG00000248890/ENSG00000100077/ENSG00000131437/ENSG00000111087/ENSG00000144857/ENSG00000271155/ENSG00000166813/ENSG00000142875	CCND2/SMO/GLI2/GAS1/EVC/GPR161/PTCH1/PTCH2/CDON/HHIP-AS1/GRK3/KIF3A/GLI1/BOC/AL161729.1/KIF7/PRKACB	hsa:894/hsa:6608/hsa:2736/hsa:2619/hsa:2121/hsa:23432/hsa:5727/hsa:8643/hsa:50937/hsa:64399/hsa:157/hsa:11127/hsa:2735/hsa:91653/hsa:5727/hsa:374654/hsa:5567	17
hsa04080	Neuroactive ligand-receptor interaction	46|1115	254|9762	0.000955649	0.0251654	ENSG00000169860/ENSG00000181104/ENSG00000116678/ENSG00000171517/ENSG00000198121/ENSG00000078549/ENSG00000011677/ENSG00000116329/ENSG00000136160/ENSG00000170989/ENSG00000102287/ENSG00000182771/ENSG00000175868/ENSG00000064989/ENSG00000180616/ENSG00000196689/ENSG00000069482/ENSG00000101204/ENSG00000170425/ENSG00000171388/ENSG00000144891/ENSG00000056291/ENSG00000122420/ENSG00000147246/ENSG00000133636…	P2RY1/F2R/LEPR/LPAR3/LPAR1/ADCYAP1R1/GABRA3/OPRD1/EDNRB/S1PR1/GABRE/GRID1/CALCB/CALCRL/SSTR2/TRPV1/GAL/CHRNA4/ADORA2B/APLN/AGTR1/NPFFR2/PTGFR/HTR2C/NTS/GRID2/GRIK5/NPY/AVPR1A/TSHR/CHRNA7/NMUR1/GRIN3A/MLNR/UTS2R/NMU/CHRNA3/TAC4/GABRR2/EDNRA/GPR83/POMC/GRIA4/-/HTR6/GRIK4	hsa:5028/hsa:2149/hsa:3953/hsa:23566/hsa:1902/hsa:117/hsa:2556/hsa:4985/hsa:1910/hsa:1901/hsa:2564/hsa:2894/hsa:797/hsa:10203/hsa:6752/hsa:7442/hsa:51083/hsa:1137/hsa:136/hsa:8862/hsa:185/hsa:10886/hsa:5737/hsa:3358/hsa:4922/hsa:2895/hsa:2901/hsa:4852/hsa:552/hsa:7253/hsa:1139/hsa:10316/hsa:116443/hsa:2862/hsa:2837/hsa:10874/hsa:1136/hsa:255061/hsa:2570/hsa:1909/hsa:10888/hsa:5443/hsa:2893/hsa:11…	46
hsa03420	Nucleotide excision repair	15|1115	56|9762	0.00117127	0.0277757	ENSG00000145736/novel.626/ENSG00000226259/ENSG00000158290/ENSG00000111445/ENSG00000272047/ENSG00000251050/ENSG00000117748/ENSG00000163918/novel.556/novel.572/ENSG00000111358/ENSG00000175595/ENSG00000134480/ENSG00000132383	GTF2H2/-/GTF2H2B/CUL4B/RFC5/GTF2H5/AC112184.1/RPA2/RFC4/-/-/GTF2H3/ERCC4/CCNH/RPA1	hsa:2966/hsa:2968/hsa:2966/hsa:8450/hsa:5985/hsa:404672/hsa:9978/hsa:6118/hsa:5984/hsa:2966/hsa:728340/hsa:2967/hsa:2072/hsa:902/hsa:6117	15
hsa04724	Glutamatergic synapse	24|1115	110|9762	0.00124214	0.0277757	ENSG00000079215/ENSG00000114450/ENSG00000127955/ENSG00000087258/ENSG00000166501/ENSG00000127920/ENSG00000116711/ENSG00000186469/ENSG00000111664/ENSG00000106688/ENSG00000168243/ENSG00000144935/ENSG00000100077/ENSG00000105737/ENSG00000188338/ENSG00000176533/ENSG00000198785/ENSG00000161681/ENSG00000172380/ENSG00000142875/ENSG00000151067/ENSG00000152578/ENSG00000154229/ENSG00000149403	SLC1A3/GNB4/GNAI1/GNAO1/PRKCB/GNG11/PLA2G4A/GNG2/GNB3/SLC1A1/GNG4/TRPC1/GRK3/GRIK5/SLC38A3/GNG7/GRIN3A/SHANK1/GNG12/PRKACB/CACNA1C/GRIA4/PRKCA/GRIK4	hsa:6507/hsa:59345/hsa:2770/hsa:2775/hsa:5579/hsa:2791/hsa:5321/hsa:54331/hsa:2784/hsa:6505/hsa:2786/hsa:7220/hsa:157/hsa:2901/hsa:10991/hsa:2788/hsa:116443/hsa:50944/hsa:55970/hsa:5567/hsa:775/hsa:2893/hsa:5578/hsa:2900	24
hsa04713	Circadian entrainment	22|1115	98|9762	0.00131847	0.0277757	ENSG00000114450/ENSG00000127955/ENSG00000087258/ENSG00000166501/ENSG00000078549/ENSG00000061918/ENSG00000127920/ENSG00000186469/ENSG00000152402/ENSG00000111664/ENSG00000185532/ENSG00000164116/ENSG00000168243/ENSG00000138669/ENSG00000176533/ENSG00000161912/ENSG00000172380/ENSG00000142875/ENSG00000151067/ENSG00000152578/ENSG00000154229/ENSG00000157542	GNB4/GNAI1/GNAO1/PRKCB/ADCYAP1R1/GUCY1B1/GNG11/GNG2/GUCY1A2/GNB3/PRKG1/GUCY1A1/GNG4/PRKG2/GNG7/ADCY10P1/GNG12/PRKACB/CACNA1C/GRIA4/PRKCA/KCNJ6	hsa:59345/hsa:2770/hsa:2775/hsa:5579/hsa:117/hsa:2983/hsa:2791/hsa:54331/hsa:2977/hsa:2784/hsa:5592/hsa:2982/hsa:2786/hsa:5593/hsa:2788/hsa:55811/hsa:55970/hsa:5567/hsa:775/hsa:2893/hsa:5578/hsa:3763	22
hsa05217	Basal cell carcinoma	17|1115	70|9762	0.00184813	0.0357961	ENSG00000128602/ENSG00000074047/ENSG00000114251/ENSG00000138795/ENSG00000081059/ENSG00000185920/ENSG00000117425/ENSG00000248890/ENSG00000122008/ENSG00000111087/ENSG00000169884/ENSG00000111432/novel.453/ENSG00000271155/ENSG00000166813/ENSG00000154342/ENSG00000104290	SMO/GLI2/WNT5A/LEF1/TCF7/PTCH1/PTCH2/HHIP-AS1/POLK/GLI1/WNT10B/FZD10/-/AL161729.1/KIF7/WNT3A/FZD3	hsa:6608/hsa:2736/hsa:7474/hsa:51176/hsa:6932/hsa:5727/hsa:8643/hsa:64399/hsa:51426/hsa:2735/hsa:7480/hsa:11211/hsa:7473/hsa:5727/hsa:374654/hsa:89780/hsa:7976	17
hsa04151	PI3K-Akt signaling pathway	65|1115	400|9762	0.00192574	0.0357961	ENSG00000134871/ENSG00000162409/ENSG00000146592/ENSG00000050555/ENSG00000118971/ENSG00000213949/ENSG00000197565/ENSG00000091136/ENSG00000114450/ENSG00000181104/ENSG00000037280/ENSG00000101680/ENSG00000187498/ENSG00000234456/ENSG00000102755/ENSG00000115232/ENSG00000171517/ENSG00000138685/ENSG00000119630/ENSG00000112769/ENSG00000198121/ENSG00000188153/ENSG00000127920/ENSG00000186469/ENSG00000157404…	COL4A2/PRKAA2/CREB5/LAMC3/CCND2/ITGA1/COL4A6/LAMB1/GNB4/F2R/FLT4/LAMA1/COL4A1/MAGI2-AS3/FLT1/ITGA4/LPAR3/FGF2/PGF/LAMA4/LPAR1/COL4A5/GNG11/GNG2/KIT/ITGA8/COL2A1/CD19/ITGA9/GNB3/LAMA2/FGF5/AKT3/ANGPT1/COMP/THBS4/FGF17/GNG4/-/COL6A1/PKN2/PDGFRA/BDNF-AS/GNG7/PTENP1/ITGA6/PDGFC/VEGFD/TNC/NTRK2/FGF9/ITGA5/EGFR/BRCA1/PIK3AP1/NTRK1/LAMA3/PDGFRB/COL6A5/GNG12/PRKCA/PPP2R1B/-/JAK3/GYS2	hsa:1284/hsa:5563/hsa:9586/hsa:10319/hsa:894/hsa:3672/hsa:1288/hsa:3912/hsa:59345/hsa:2149/hsa:2324/hsa:284217/hsa:1282/hsa:9863/hsa:2321/hsa:3676/hsa:23566/hsa:2247/hsa:5228/hsa:3910/hsa:1902/hsa:1287/hsa:2791/hsa:54331/hsa:3815/hsa:8516/hsa:1280/hsa:930/hsa:3680/hsa:2784/hsa:3908/hsa:2250/hsa:10000/hsa:284/hsa:1311/hsa:7060/hsa:8822/hsa:2786/hsa:10000/hsa:1291/hsa:5586/hsa:5156/hsa:627/hsa:2788…	65
hsa05202	Transcriptional misregulation in cancer	40|1115	224|9762	0.00259643	0.0455818	ENSG00000118971/ENSG00000148516/ENSG00000253293/ENSG00000005073/ENSG00000104368/ENSG00000102755/ENSG00000078399/ENSG00000135903/ENSG00000058091/ENSG00000156298/ENSG00000178573/ENSG00000184937/ENSG00000009709/ENSG00000081189/ENSG00000104313/ENSG00000101017/ENSG00000006468/ENSG00000149311/ENSG00000143995/ENSG00000240990/ENSG00000151702/ENSG00000143171/ENSG00000126778/ENSG00000268573/ENSG00000150907…	CCND2/ZEB1/HOXA10/HOXA11/PLAT/FLT1/HOXA9/PAX3/CDK14/TSPAN7/MAF/WT1/PAX7/MEF2C/EYA1/CD40/ETV1/ATM/MEIS1/HOXA11-AS/FLI1/RXRG/SIX1/AC011815.1/FOXO1/HDAC2/ZBTB16/FOXO1B/POLK/CDKN2C/NTRK1/HDAC1/RPL34-AS1/AL928921.2/MLF1/RUNX1T1/AC011504.1/MITF/MLLT3/H3F3AP6	hsa:894/hsa:6935/hsa:3206/hsa:3207/hsa:5327/hsa:2321/hsa:3205/hsa:5077/hsa:5218/hsa:7102/hsa:4094/hsa:7490/hsa:5081/hsa:4208/hsa:2138/hsa:958/hsa:2115/hsa:472/hsa:4211/hsa:3207/hsa:2313/hsa:6258/hsa:6495/hsa:5966/hsa:2308/hsa:3066/hsa:7704/hsa:2308/hsa:51426/hsa:1031/hsa:4914/hsa:3065/hsa:5966/hsa:5966/hsa:4291/hsa:862/hsa:5966/hsa:4286/hsa:4300/hsa:3020	40
hsa04550	Signaling pathways regulating pluripotency of stem cells	30|1115	156|9762	0.0027694	0.0460596	ENSG00000114251/ENSG00000016082/ENSG00000105991/ENSG00000007372/ENSG00000138685/ENSG00000081059/ENSG00000119715/ENSG00000105880/ENSG00000113196/ENSG00000123612/ENSG00000120693/ENSG00000117020/ENSG00000123576/ENSG00000130829/ENSG00000143995/ENSG00000113594/novel.503/ENSG00000156925/ENSG00000204531/ENSG00000114739/ENSG00000156374/ENSG00000169884/ENSG00000111432/novel.453/ENSG00000172201/ENSG0000016…	WNT5A/ISL1/HOXA1/PAX6/FGF2/TCF7/ESRRB/DLX5/HAND1/ACVR1C/SMAD9/AKT3/ESX1/DUSP9/MEIS1/LIFR/-/ZIC3/POU5F1/ACVR2B/PCGF6/WNT10B/FZD10/-/ID4/SMARCAD1/WNT3A/FZD3/JAK3/TBX3	hsa:7474/hsa:3670/hsa:3198/hsa:5080/hsa:2247/hsa:6932/hsa:2103/hsa:1749/hsa:9421/hsa:130399/hsa:4093/hsa:10000/hsa:80712/hsa:1852/hsa:4211/hsa:3977/hsa:10000/hsa:7547/hsa:5460/hsa:93/hsa:84108/hsa:7480/hsa:11211/hsa:7473/hsa:3400/hsa:56916/hsa:89780/hsa:7976/hsa:3718/hsa:6926	30
