# Supplementary material for: A single cysteine residue in vimentin regulates long non-coding RNA XIST to suppress epithelial–mesenchymal transition and stemness in breast cancer
Source: eLife. 2025 Jul 21;14:RP104191. doi: 10.7554/eLife.104191 (PMC12279371; doi:10.7554/eLife.104191)
Supplement: Figure 3—figure supplement 3—source data 3. [file elife-104191-fig3-figsupp3-data3.xlsx]

## Sheet: Figure 3-figure supplement 3-so
All Altered Cellular Functions by KEGG Analysis
KEGGID	Description	GeneRatio	BgRatio	pvalue	padj	geneID	geneName	keggID	Count	Up	Up_Gene_id	Down	Down_Gene_id
hsa05034	Alcoholism	97|2593	206|9762	1.4317e-10	4.59576e-08	ENSG00000180573/ENSG00000184678/ENSG00000146592/ENSG00000176884/ENSG00000273802/ENSG00000158373/ENSG00000278828/ENSG00000158406/ENSG00000114450/ENSG00000127955/ENSG00000180596/ENSG00000246705/ENSG00000087258/ENSG00000196787/ENSG00000184845/ENSG00000152495/ENSG00000273983/ENSG00000173175/ENSG00000124635/ENSG00000178372/ENSG00000196747/ENSG00000275713/ENSG00000127920/ENSG00000198246/ENSG00000197903…	HIST1H2AC/HIST2H2BE/CREB5/GRIN1/HIST1H2BG/HIST1H2BD/HIST1H3H/HIST1H4H/GNB4/GNAI1/HIST1H2BC/H2AFJ/GNAO1/HIST1H2AG/DRD1/CAMK4/HIST1H3G/ADCY5/HIST1H2BJ/CALML5/HIST1H2AI/HIST1H2BH/GNG11/SLC29A3/HIST1H2BK/HIST1H2AE/HIST2H2BF/GNG2/HIST1H2APS4/HIST4H4/CREB3L4/TH/HIST1H2BF/-/HIST2H2AC/GNB3/GNB5/GNB2/HIST1H3B/GNAS/ADORA2B/HIST2H3D/GNG4/HDAC9/HIST1H2AJ/HIST1H4K/HIST1H2APS3/HIST2H4B/HIST2H2AA4/H3F3B/HIST2H2…	hsa:8334/hsa:8349/hsa:9586/hsa:2902/hsa:8343/hsa:3017/hsa:8352/hsa:8370/hsa:59345/hsa:2770/hsa:8343/hsa:55766/hsa:2775/hsa:8336/hsa:1812/hsa:814/hsa:8352/hsa:111/hsa:8970/hsa:51806/hsa:8336/hsa:8345/hsa:2791/hsa:55315/hsa:85236/hsa:8335/hsa:440689/hsa:54331/hsa:8336/hsa:8370/hsa:148327/hsa:7054/hsa:8343/hsa:1388/hsa:8338/hsa:2784/hsa:10681/hsa:2783/hsa:8352/hsa:2778/hsa:136/hsa:126961/hsa:2786/hs…	97	25	ENSG00000146592/ENSG00000114450/ENSG00000127955/ENSG00000087258/ENSG00000152495/ENSG00000127920/ENSG00000186469/ENSG00000111664/ENSG00000170425/ENSG00000168243/ENSG00000048052/ENSG00000245573/ENSG00000176533/ENSG00000196591/ENSG00000122585/ENSG00000198785/ENSG00000148053/ENSG00000099284/ENSG00000116478/ENSG00000172380/ENSG00000142875/ENSG00000277879/ENSG00000235946/ENSG00000186298/ENSG00000178458	72	ENSG00000180573/ENSG00000184678/ENSG00000176884/ENSG00000273802/ENSG00000158373/ENSG00000278828/ENSG00000158406/ENSG00000180596/ENSG00000246705/ENSG00000196787/ENSG00000184845/ENSG00000273983/ENSG00000173175/ENSG00000124635/ENSG00000178372/ENSG00000196747/ENSG00000275713/ENSG00000198246/ENSG00000197903/ENSG00000277075/ENSG00000203814/ENSG00000218690/ENSG00000197837/ENSG00000143578/ENSG00000180176…
hsa04512	ECM-receptor interaction	52|2593	95|9762	4.88567e-09	5.79289e-07	ENSG00000137801/ENSG00000159164/ENSG00000134871/ENSG00000132470/ENSG00000050555/ENSG00000026508/ENSG00000196878/ENSG00000213949/ENSG00000197565/ENSG00000091136/ENSG00000115221/ENSG00000101680/ENSG00000187498/ENSG00000005884/ENSG00000115232/ENSG00000124145/ENSG00000188157/ENSG00000168743/ENSG00000115884/ENSG00000112769/ENSG00000188153/ENSG00000077943/ENSG00000130702/ENSG00000150893/ENSG00000139219…	THBS1/SV2A/COL4A2/ITGB4/LAMC3/CD44/LAMB3/ITGA1/COL4A6/LAMB1/ITGB6/LAMA1/COL4A1/ITGA3/ITGA4/SDC4/AGRN/NPNT/SDC1/LAMA4/COL4A5/ITGA8/LAMA5/FREM2/COL2A1/ITGA9/LAMA2/COMP/THBS4/HSPG2/FN1/ITGB5/COL6A1/LAMC2/LAMB2/CD47/VWFP1/COL9A2/ITGA6/ITGB7/TNC/ITGA5/TPTEP1/ESRRAP2/COL9A3/LAMA3/VWF/HMMR/COL6A5/DAG1/GP1BA/THBS3	hsa:7057/hsa:9900/hsa:1284/hsa:3691/hsa:10319/hsa:960/hsa:3914/hsa:3672/hsa:1288/hsa:3912/hsa:3694/hsa:284217/hsa:1282/hsa:3675/hsa:3676/hsa:6385/hsa:375790/hsa:255743/hsa:6382/hsa:3910/hsa:1287/hsa:8516/hsa:3911/hsa:341640/hsa:1280/hsa:3680/hsa:3908/hsa:1311/hsa:7060/hsa:3339/hsa:2335/hsa:3693/hsa:1291/hsa:3918/hsa:3913/hsa:961/hsa:7450/hsa:1298/hsa:3655/hsa:3695/hsa:3371/hsa:3678/hsa:7450/hsa:3…	52	26	ENSG00000159164/ENSG00000134871/ENSG00000050555/ENSG00000213949/ENSG00000197565/ENSG00000091136/ENSG00000101680/ENSG00000187498/ENSG00000115232/ENSG00000112769/ENSG00000188153/ENSG00000077943/ENSG00000139219/ENSG00000144668/ENSG00000196569/ENSG00000105664/ENSG00000113296/ENSG00000142156/ENSG00000091409/ENSG00000041982/ENSG00000161638/ENSG00000235438/ENSG00000053747/ENSG00000072571/ENSG00000172752…	26	ENSG00000137801/ENSG00000132470/ENSG00000026508/ENSG00000196878/ENSG00000115221/ENSG00000005884/ENSG00000124145/ENSG00000188157/ENSG00000168743/ENSG00000115884/ENSG00000130702/ENSG00000150893/ENSG00000142798/ENSG00000115414/ENSG00000082781/ENSG00000058085/ENSG00000172037/ENSG00000196776/ENSG00000241717/ENSG00000049089/ENSG00000139626/ENSG00000100181/ENSG00000092758/ENSG00000110799/ENSG00000173402…
hsa04514	Cell adhesion molecules (CAMs)	71|2593	145|9762	5.41391e-09	5.79289e-07	ENSG00000039068/ENSG00000198910/ENSG00000165215/ENSG00000181885/ENSG00000062038/ENSG00000170558/ENSG00000166086/ENSG00000149294/ENSG00000213937/ENSG00000163347/ENSG00000090339/ENSG00000177707/ENSG00000204525/ENSG00000038427/ENSG00000154654/ENSG00000234745/ENSG00000131409/ENSG00000115232/ENSG00000124145/ENSG00000018236/ENSG00000169760/ENSG00000115884/ENSG00000277117/ENSG00000105695/novel.665/ENSG0…	CDH1/L1CAM/CLDN3/CLDN7/CDH3/CDH2/JAM3/NCAM1/CLDN9/CLDN1/ICAM1/NECTIN3/HLA-C/VCAN/NCAM2/HLA-B/LRRC4B/ITGA4/SDC4/CNTN1/NLGN1/SDC1/FP565260.3/MAG/-/CD22/NRCAM/VTCN1/ITGA8/-/PTPRM/CD40/HLA-DRB5/NRXN2/HLA-DRB6/ITGA9/NECTIN2/ITGAM/NLGN3/F11R/-/NFASC/AC126773.2/NECTIN1/JAM2/NRXN3/-/-/-/ITGA6/-/CD226/CLDN18/-/ITGB7/CD34/-/CD276/CADM1/-/PTPRF/CLDN2/SELPLG/CLDN6/LRRC4/CLDN10/GLG1/CD4/SELL/CNTNAP1/CDH5	hsa:999/hsa:3897/hsa:1365/hsa:1366/hsa:1001/hsa:1000/hsa:83700/hsa:4684/hsa:9080/hsa:9076/hsa:3383/hsa:25945/hsa:3107/hsa:1462/hsa:4685/hsa:3106/hsa:94030/hsa:3676/hsa:6385/hsa:1272/hsa:22871/hsa:6382/hsa:102723996/hsa:4099/hsa:3106/hsa:933/hsa:4897/hsa:79679/hsa:8516/hsa:3107/hsa:5797/hsa:958/hsa:3127/hsa:9379/hsa:3126/hsa:3680/hsa:5819/hsa:3684/hsa:54413/hsa:50848/hsa:3133/hsa:23114/hsa:1001/hs…	71	32	ENSG00000170558/ENSG00000166086/ENSG00000149294/ENSG00000177707/ENSG00000204525/ENSG00000038427/ENSG00000234745/ENSG00000131409/ENSG00000115232/ENSG00000018236/ENSG00000169760/ENSG00000077943/ENSG00000173482/ENSG00000101017/ENSG00000110076/ENSG00000144668/ENSG00000196338/novel.625/ENSG00000163531/ENSG00000154721/ENSG00000021645/novel.594/ENSG00000091409/ENSG00000150637/ENSG00000066405/ENSG0000017…	39	ENSG00000039068/ENSG00000198910/ENSG00000165215/ENSG00000181885/ENSG00000062038/ENSG00000213937/ENSG00000163347/ENSG00000090339/ENSG00000154654/ENSG00000124145/ENSG00000115884/ENSG00000277117/ENSG00000105695/novel.665/ENSG00000012124/ENSG00000091129/ENSG00000134258/novel.685/ENSG00000198502/ENSG00000229391/ENSG00000130202/ENSG00000169896/ENSG00000158769/ENSG00000260577/ENSG00000110400/novel.622/n…
hsa04360	Axon guidance	92|2593	209|9762	2.85923e-08	2.29454e-06	ENSG00000198910/ENSG00000164690/ENSG00000198753/ENSG00000128602/ENSG00000143869/ENSG00000107562/ENSG00000138835/ENSG00000124171/ENSG00000169242/ENSG00000001617/ENSG00000173156/ENSG00000127955/ENSG00000114251/ENSG00000010810/ENSG00000164050/ENSG00000101096/ENSG00000185008/ENSG00000102981/ENSG00000075223/ENSG00000099250/ENSG00000145147/ENSG00000172830/ENSG00000154134/ENSG00000146904/ENSG00000112902…	L1CAM/SHH/PLXNB3/SMO/GDF7/CXCL12/RGS3/PARD6B/EFNA1/SEMA3F/RHOD/GNAI1/WNT5A/FYN/PLXNB1/NFATC2/ROBO2/PARD6A/SEMA3C/NRP1/SLIT2/SSH3/ROBO3/EPHA1/SEMA5A/AL390719.1/MYL12A/PTCH1/EPHA8/BMP7/PLXNB2/MYL12B/WNT4/EPHA5/SEMA4A/EPHA7/SEMA4B/NTN4/SEMA4C/PIK3R1/RND1/EPHB3/EPHB1/SEMA3B/TRPC3/ABLIM1/SEMA3D/CXCR4/SEMA3G/CAMK2B/ABLIM2/AL645608.9/PAK1/EFNA4/PPP3CA/RRAS/SLIT1/SRGAP1/SEMA6B/PLXNA2/PAK3/RGMA/UNC5C/PAK4…	hsa:3897/hsa:6469/hsa:5365/hsa:6608/hsa:151449/hsa:6387/hsa:5998/hsa:84612/hsa:1942/hsa:6405/hsa:29984/hsa:2770/hsa:7474/hsa:2534/hsa:5364/hsa:4773/hsa:6092/hsa:50855/hsa:10512/hsa:8829/hsa:9353/hsa:54961/hsa:64221/hsa:2041/hsa:9037/hsa:5781/hsa:10627/hsa:5727/hsa:2046/hsa:655/hsa:23654/hsa:103910/hsa:54361/hsa:2044/hsa:64218/hsa:2045/hsa:10509/hsa:59277/hsa:54910/hsa:5295/hsa:27289/hsa:2049/hsa:…	92	34	ENSG00000128602/ENSG00000143869/ENSG00000127955/ENSG00000114251/ENSG00000010810/ENSG00000185008/ENSG00000145147/ENSG00000154134/ENSG00000185920/ENSG00000070886/ENSG00000145242/ENSG00000135333/ENSG00000154928/ENSG00000138741/ENSG00000099204/ENSG00000153993/ENSG00000010319/ENSG00000149269/ENSG00000076356/ENSG00000077264/ENSG00000182175/ENSG00000182168/ENSG00000184347/ENSG00000144935/ENSG00000092421…	58	ENSG00000198910/ENSG00000164690/ENSG00000198753/ENSG00000107562/ENSG00000138835/ENSG00000124171/ENSG00000169242/ENSG00000001617/ENSG00000173156/ENSG00000164050/ENSG00000101096/ENSG00000102981/ENSG00000075223/ENSG00000099250/ENSG00000172830/ENSG00000146904/ENSG00000112902/ENSG00000217801/ENSG00000101608/ENSG00000101144/ENSG00000196576/ENSG00000118680/ENSG00000162552/ENSG00000196189/ENSG00000185033…
hsa05322	Systemic lupus erythematosus	59|2593	124|9762	3.70206e-07	2.15697e-05	ENSG00000180573/ENSG00000184678/ENSG00000273802/ENSG00000158373/ENSG00000278828/ENSG00000158406/ENSG00000180596/ENSG00000246705/ENSG00000196787/ENSG00000273983/ENSG00000125730/ENSG00000124635/novel.276/ENSG00000196747/ENSG00000275713/ENSG00000197903/ENSG00000277075/ENSG00000203814/ENSG00000218690/ENSG00000197837/ENSG00000101017/ENSG00000277224/ENSG00000198502/ENSG00000184260/ENSG00000229391/ENSG0…	HIST1H2AC/HIST2H2BE/HIST1H2BG/HIST1H2BD/HIST1H3H/HIST1H4H/HIST1H2BC/H2AFJ/HIST1H2AG/HIST1H3G/C3/HIST1H2BJ/-/HIST1H2AI/HIST1H2BH/HIST1H2BK/HIST1H2AE/HIST2H2BF/HIST1H2APS4/HIST4H4/CD40/HIST1H2BF/HLA-DRB5/HIST2H2AC/HLA-DRB6/HIST1H3B/HIST2H3D/HIST1H2AJ/HIST1H4K/HIST1H2APS3/HIST2H4B/HIST2H2AA4/H3F3B/HIST2H2AA3/H3F3C/HIST1H3A/C1S/HIST2H2BD/HIST1H2BN/ACTN1/HIST1H2BL/HIST2H2BC/HIST1H2AL/HIST1H2BE/AL03177…	hsa:8334/hsa:8349/hsa:8343/hsa:3017/hsa:8352/hsa:8370/hsa:8343/hsa:55766/hsa:8336/hsa:8352/hsa:718/hsa:8970/hsa:81/hsa:8336/hsa:8345/hsa:85236/hsa:8335/hsa:440689/hsa:8336/hsa:8370/hsa:958/hsa:8343/hsa:3127/hsa:8338/hsa:3126/hsa:8352/hsa:126961/hsa:8331/hsa:8370/hsa:92815/hsa:8370/hsa:723790/hsa:3020/hsa:723790/hsa:440093/hsa:8352/hsa:716/hsa:8970/hsa:8341/hsa:87/hsa:8340/hsa:8970/hsa:8336/hsa:83…	59	5	ENSG00000101017/ENSG00000182326/ENSG00000099284/ENSG00000235946/ENSG00000178458	54	ENSG00000180573/ENSG00000184678/ENSG00000273802/ENSG00000158373/ENSG00000278828/ENSG00000158406/ENSG00000180596/ENSG00000246705/ENSG00000196787/ENSG00000273983/ENSG00000125730/ENSG00000124635/novel.276/ENSG00000196747/ENSG00000275713/ENSG00000197903/ENSG00000277075/ENSG00000203814/ENSG00000218690/ENSG00000197837/ENSG00000277224/ENSG00000198502/ENSG00000184260/ENSG00000229391/ENSG00000274267/ENSG0…
hsa04510	Focal adhesion	106|2593	261|9762	4.03172e-07	2.15697e-05	ENSG00000137801/ENSG00000100311/ENSG00000134871/ENSG00000128591/ENSG00000132470/ENSG00000050555/ENSG00000118971/ENSG00000196878/ENSG00000213949/ENSG00000197565/ENSG00000091136/ENSG00000162909/ENSG00000115221/ENSG00000037280/ENSG00000101680/ENSG00000187498/ENSG00000010810/ENSG00000102755/ENSG00000005884/ENSG00000115232/ENSG00000166501/ENSG00000119630/ENSG00000112769/ENSG00000110092/novel.276/ENSG0…	THBS1/PDGFB/COL4A2/FLNC/ITGB4/LAMC3/CCND2/LAMB3/ITGA1/COL4A6/LAMB1/CAPN2/ITGB6/FLT4/LAMA1/COL4A1/FYN/FLT1/ITGA3/ITGA4/PRKCB/PGF/LAMA4/CCND1/-/MYL12A/COL4A5/PARVB/-/MYL12B/PIK3R1/ITGA8/LAMA5/PDGFA/VASP/COL2A1/ITGA9/LAMA2/AKT3/CAV1/PAK1/AKT1/COMP/THBS4/FLNA/PXN/PAK3/FN1/BIRC3/VAV2/PDPK2P/PAK4/ITGB5/-/CAV3/COL6A1/IGF1R/LAMC2/LAMB2/BCAR1/ACTBP2/PDGFRA/PPP1CA/VWFP1/COL9A2/ARHGAP35/ACTB/PARVA/PTENP1/IT…	hsa:7057/hsa:5155/hsa:1284/hsa:2318/hsa:3691/hsa:10319/hsa:894/hsa:3914/hsa:3672/hsa:1288/hsa:3912/hsa:824/hsa:3694/hsa:2324/hsa:284217/hsa:1282/hsa:2534/hsa:2321/hsa:3675/hsa:3676/hsa:5579/hsa:5228/hsa:3910/hsa:595/hsa:81/hsa:10627/hsa:1287/hsa:29780/hsa:9564/hsa:103910/hsa:5295/hsa:8516/hsa:3911/hsa:5154/hsa:7408/hsa:1280/hsa:3680/hsa:3908/hsa:10000/hsa:857/hsa:5058/hsa:207/hsa:1311/hsa:7060/hs…	106	49	ENSG00000134871/ENSG00000128591/ENSG00000050555/ENSG00000118971/ENSG00000213949/ENSG00000197565/ENSG00000091136/ENSG00000162909/ENSG00000037280/ENSG00000101680/ENSG00000187498/ENSG00000010810/ENSG00000102755/ENSG00000115232/ENSG00000166501/ENSG00000119630/ENSG00000112769/ENSG00000188153/ENSG00000188677/ENSG00000077943/ENSG00000139219/ENSG00000144668/ENSG00000196569/ENSG00000117020/ENSG00000149269…	57	ENSG00000137801/ENSG00000100311/ENSG00000132470/ENSG00000196878/ENSG00000115221/ENSG00000005884/ENSG00000110092/novel.276/ENSG00000101608/novel.422/ENSG00000118680/ENSG00000145675/ENSG00000130702/ENSG00000197461/ENSG00000125753/ENSG00000105974/ENSG00000142208/ENSG00000196924/ENSG00000089159/ENSG00000115414/ENSG00000023445/ENSG00000160293/ENSG00000205918/ENSG00000130669/ENSG00000082781/ENSG0000014…
hsa05202	Transcriptional misregulation in cancer	91|2593	224|9762	2.60453e-06	0.000119436	ENSG00000166145/ENSG00000184012/ENSG00000146674/ENSG00000176046/ENSG00000278828/ENSG00000118971/ENSG00000148516/ENSG00000253293/ENSG00000005073/ENSG00000124813/ENSG00000104368/ENSG00000124762/ENSG00000173801/ENSG00000102755/ENSG00000078399/ENSG00000273983/ENSG00000135903/ENSG00000058091/ENSG00000156298/ENSG00000178573/ENSG00000131759/ENSG00000125618/ENSG00000184937/ENSG00000099860/ENSG00000130222…	SPINT1/TMPRSS2/IGFBP3/NUPR1/HIST1H3H/CCND2/ZEB1/HOXA10/HOXA11/RUNX2/PLAT/CDKN1A/JUP/FLT1/HOXA9/HIST1H3G/PAX3/CDK14/TSPAN7/MAF/RARA/PAX8/WT1/GADD45B/GADD45G/RXRA/BCL6/PAX7/BAIAP3/MEF2C/EYA1/CD40/ERG/ETV1/NFKBIZ/PDGFA/ATM/CEBPB/ITGAM/ETV5/MMP9/CXCL8/HIST1H3B/AC080112.3/HIST2H3D/MEIS1/MYCN/CDKN1B/BIRC3/PAX5/HOXA11-AS/BCL11B/IGF1R/NGFR/FLI1/H3F3B/RXRG/SIX1/H3F3C/AC011815.1/BCL2L1/DDIT3/HIST1H3A/FOXO1…	hsa:6692/hsa:7113/hsa:3486/hsa:26471/hsa:8352/hsa:894/hsa:6935/hsa:3206/hsa:3207/hsa:860/hsa:5327/hsa:1026/hsa:3728/hsa:2321/hsa:3205/hsa:8352/hsa:5077/hsa:5218/hsa:7102/hsa:4094/hsa:5914/hsa:7849/hsa:7490/hsa:4616/hsa:10912/hsa:6256/hsa:604/hsa:5081/hsa:8938/hsa:4208/hsa:2138/hsa:958/hsa:2078/hsa:2115/hsa:64332/hsa:5154/hsa:472/hsa:1051/hsa:3684/hsa:2119/hsa:4318/hsa:3576/hsa:8352/hsa:5914/hsa:1…	91	40	ENSG00000118971/ENSG00000148516/ENSG00000253293/ENSG00000005073/ENSG00000104368/ENSG00000102755/ENSG00000078399/ENSG00000135903/ENSG00000058091/ENSG00000156298/ENSG00000178573/ENSG00000184937/ENSG00000009709/ENSG00000081189/ENSG00000104313/ENSG00000101017/ENSG00000006468/ENSG00000149311/ENSG00000143995/ENSG00000240990/ENSG00000151702/ENSG00000143171/ENSG00000126778/ENSG00000268573/ENSG00000150907…	51	ENSG00000166145/ENSG00000184012/ENSG00000146674/ENSG00000176046/ENSG00000278828/ENSG00000124813/ENSG00000124762/ENSG00000173801/ENSG00000273983/ENSG00000131759/ENSG00000125618/ENSG00000099860/ENSG00000130222/ENSG00000186350/ENSG00000113916/ENSG00000007516/ENSG00000157554/ENSG00000144802/ENSG00000197461/ENSG00000172216/ENSG00000169896/ENSG00000244405/ENSG00000100985/ENSG00000169429/ENSG00000274267…
hsa04713	Circadian entrainment	47|2593	98|9762	4.24244e-06	0.000170228	ENSG00000176884/ENSG00000114450/ENSG00000127955/ENSG00000108551/ENSG00000162989/ENSG00000087258/ENSG00000173175/ENSG00000170345/ENSG00000196557/ENSG00000166501/ENSG00000178372/ENSG00000078549/ENSG00000061918/ENSG00000127920/ENSG00000186469/ENSG00000152402/ENSG00000111664/ENSG00000069966/ENSG00000058404/ENSG00000096433/ENSG00000185532/ENSG00000164116/ENSG00000100346/ENSG00000172354/ENSG00000087460…	GRIN1/GNB4/GNAI1/RASD1/KCNJ3/GNAO1/ADCY5/FOS/CACNA1H/PRKCB/CALML5/ADCYAP1R1/GUCY1B1/GNG11/GNG2/GUCY1A2/GNB3/GNB5/CAMK2B/ITPR3/PRKG1/GUCY1A1/CACNA1I/GNB2/GNAS/GNG4/PRKG2/GNAQP1/GNAI2/NOS1AP/GNG7/PLCB4/CALML6/ITPR1/ADCY9/ADCY6/ADCY10P1/CACNA1D/GNG12/PRKACB/CACNA1C/PER2/GRIA4/PRKCA/MAPK3/KCNJ6/CALM1	hsa:2902/hsa:59345/hsa:2770/hsa:51655/hsa:3760/hsa:2775/hsa:111/hsa:2353/hsa:8912/hsa:5579/hsa:51806/hsa:117/hsa:2983/hsa:2791/hsa:54331/hsa:2977/hsa:2784/hsa:10681/hsa:816/hsa:3710/hsa:5592/hsa:2982/hsa:8911/hsa:2783/hsa:2778/hsa:2786/hsa:5593/hsa:2776/hsa:2771/hsa:9722/hsa:2788/hsa:5332/hsa:163688/hsa:3708/hsa:115/hsa:112/hsa:55811/hsa:776/hsa:55970/hsa:5567/hsa:775/hsa:8864/hsa:2893/hsa:5578/h…	47	22	ENSG00000114450/ENSG00000127955/ENSG00000087258/ENSG00000166501/ENSG00000078549/ENSG00000061918/ENSG00000127920/ENSG00000186469/ENSG00000152402/ENSG00000111664/ENSG00000185532/ENSG00000164116/ENSG00000168243/ENSG00000138669/ENSG00000176533/ENSG00000161912/ENSG00000172380/ENSG00000142875/ENSG00000151067/ENSG00000152578/ENSG00000154229/ENSG00000157542	25	ENSG00000176884/ENSG00000108551/ENSG00000162989/ENSG00000173175/ENSG00000170345/ENSG00000196557/ENSG00000178372/ENSG00000069966/ENSG00000058404/ENSG00000096433/ENSG00000100346/ENSG00000172354/ENSG00000087460/ENSG00000214077/ENSG00000114353/ENSG00000198929/ENSG00000101333/ENSG00000169885/ENSG00000150995/ENSG00000162104/ENSG00000174233/ENSG00000157388/ENSG00000132326/ENSG00000102882/ENSG00000198668
hsa05412	Arrhythmogenic right ventricular cardiomyopathy (ARVC)	51|2593	111|9762	7.98619e-06	0.000284841	ENSG00000075461/ENSG00000152661/ENSG00000170558/ENSG00000132470/ENSG00000102683/ENSG00000074370/ENSG00000213949/ENSG00000115221/ENSG00000101680/ENSG00000173801/ENSG00000005884/ENSG00000138795/ENSG00000115232/ENSG00000182389/ENSG00000153956/ENSG00000183023/ENSG00000081059/ENSG00000077522/ENSG00000167535/ENSG00000198947/ENSG00000160789/ENSG00000077943/ENSG00000258441/ENSG00000144668/ENSG00000196569…	CACNG4/GJA1/CDH2/ITGB4/SGCG/ATP2A3/ITGA1/ITGB6/LAMA1/JUP/ITGA3/LEF1/ITGA4/CACNB4/CACNA2D1/SLC8A1/TCF7/ACTN2/CACNB3/DMD/LMNA/ITGA8/LINC00641/ITGA9/LAMA2/CACNA2D3/CACNG8/CACNB2/ITGB5/SLC8A3/PKP2/DSG2/ACTBP2/CTNNA3/DSC2/DSP/ACTB/ITGA6/ITGB7/CTNNA1/ITGA5/CACNG1/CACNA1D/AC098934.2/CACNA2D2/DAG1/LINC00939/CACNA1C/MESTIT1/AC023347.1/SGCB	hsa:27092/hsa:2697/hsa:1000/hsa:3691/hsa:6445/hsa:489/hsa:3672/hsa:3694/hsa:284217/hsa:3728/hsa:3675/hsa:51176/hsa:3676/hsa:785/hsa:781/hsa:6546/hsa:6932/hsa:88/hsa:784/hsa:1756/hsa:4000/hsa:8516/hsa:5318/hsa:3680/hsa:3908/hsa:55799/hsa:59283/hsa:783/hsa:3693/hsa:6547/hsa:5318/hsa:1829/hsa:60/hsa:29119/hsa:1824/hsa:1832/hsa:60/hsa:3655/hsa:3695/hsa:1495/hsa:3678/hsa:786/hsa:776/hsa:71/hsa:9254/hs…	51	28	ENSG00000152661/ENSG00000170558/ENSG00000213949/ENSG00000101680/ENSG00000138795/ENSG00000115232/ENSG00000182389/ENSG00000153956/ENSG00000183023/ENSG00000081059/ENSG00000077522/ENSG00000198947/ENSG00000077943/ENSG00000258441/ENSG00000144668/ENSG00000196569/ENSG00000157445/ENSG00000142408/ENSG00000165995/ENSG00000100678/ENSG00000046604/ENSG00000134755/ENSG00000091409/ENSG00000161638/ENSG00000007402…	23	ENSG00000075461/ENSG00000132470/ENSG00000102683/ENSG00000074370/ENSG00000115221/ENSG00000173801/ENSG00000005884/ENSG00000167535/ENSG00000160789/ENSG00000082781/ENSG00000057294/ENSG00000213763/ENSG00000183230/ENSG00000096696/ENSG00000075624/ENSG00000139626/ENSG00000044115/ENSG00000108878/ENSG00000157388/ENSG00000234996/ENSG00000173402/ENSG00000249267/ENSG00000272701
hsa04724	Glutamatergic synapse	50|2593	110|9762	1.41087e-05	0.000452889	ENSG00000162105/ENSG00000176884/ENSG00000079215/ENSG00000124493/ENSG00000114450/ENSG00000127955/ENSG00000162989/ENSG00000087258/ENSG00000110436/ENSG00000173175/ENSG00000166501/ENSG00000168907/ENSG00000127920/ENSG00000116711/ENSG00000163873/ENSG00000186469/ENSG00000111664/ENSG00000069966/ENSG00000051128/ENSG00000096433/ENSG00000106688/ENSG00000138814/ENSG00000172354/ENSG00000087460/ENSG00000168243…	SHANK2/GRIN1/SLC1A3/GRM4/GNB4/GNAI1/KCNJ3/GNAO1/SLC1A2/ADCY5/PRKCB/PLA2G4F/GNG11/PLA2G4A/GRIK3/GNG2/GNB3/GNB5/HOMER3/ITPR3/SLC1A1/PPP3CA/GNB2/GNAS/GNG4/GNAQP1/TRPC1/GNAI2/GRK3/GRIK5/SLC38A3/GNG7/PLCB4/GRIN3A/SLC38A1/ITPR1/ADCY9/ADCY6/GRK2/PLA2G4C/SHANK1/CACNA1D/GNG12/PRKACB/CACNA1C/GRIA4/PRKCA/MAPK3/GRIK4/-	hsa:22941/hsa:2902/hsa:6507/hsa:2914/hsa:59345/hsa:2770/hsa:3760/hsa:2775/hsa:6506/hsa:111/hsa:5579/hsa:255189/hsa:2791/hsa:5321/hsa:2899/hsa:54331/hsa:2784/hsa:10681/hsa:9454/hsa:3710/hsa:6505/hsa:5530/hsa:2783/hsa:2778/hsa:2786/hsa:2776/hsa:7220/hsa:2771/hsa:157/hsa:2901/hsa:10991/hsa:2788/hsa:5332/hsa:116443/hsa:81539/hsa:3708/hsa:115/hsa:112/hsa:156/hsa:8605/hsa:50944/hsa:776/hsa:55970/hsa:55…	50	24	ENSG00000079215/ENSG00000114450/ENSG00000127955/ENSG00000087258/ENSG00000166501/ENSG00000127920/ENSG00000116711/ENSG00000186469/ENSG00000111664/ENSG00000106688/ENSG00000168243/ENSG00000144935/ENSG00000100077/ENSG00000105737/ENSG00000188338/ENSG00000176533/ENSG00000198785/ENSG00000161681/ENSG00000172380/ENSG00000142875/ENSG00000151067/ENSG00000152578/ENSG00000154229/ENSG00000149403	26	ENSG00000162105/ENSG00000176884/ENSG00000124493/ENSG00000162989/ENSG00000110436/ENSG00000173175/ENSG00000168907/ENSG00000163873/ENSG00000069966/ENSG00000051128/ENSG00000096433/ENSG00000138814/ENSG00000172354/ENSG00000087460/ENSG00000214077/ENSG00000114353/ENSG00000101333/ENSG00000111371/ENSG00000150995/ENSG00000162104/ENSG00000174233/ENSG00000173020/ENSG00000105499/ENSG00000157388/ENSG00000102882…
hsa04725	Cholinergic synapse	51|2593	115|9762	2.67584e-05	0.000780858	ENSG00000146592/ENSG00000114450/ENSG00000127955/ENSG00000184185/ENSG00000010810/ENSG00000162989/ENSG00000087258/ENSG00000152495/ENSG00000087085/ENSG00000173175/ENSG00000185760/ENSG00000148408/ENSG00000170345/ENSG00000166501/ENSG00000168539/ENSG00000127920/ENSG00000186469/ENSG00000145675/ENSG00000143578/ENSG00000075043/ENSG00000111664/ENSG00000069966/ENSG00000117020/ENSG00000058404/ENSG00000096433…	CREB5/GNB4/GNAI1/KCNJ12/FYN/KCNJ3/GNAO1/CAMK4/ACHE/ADCY5/KCNQ5/CACNA1B/FOS/PRKCB/CHRM1/GNG11/GNG2/PIK3R1/CREB3L4/KCNQ2/GNB3/GNB5/AKT3/CAMK2B/ITPR3/AKT1/GNB2/-/CHRNA4/GNG4/-/GNAQP1/GNAI2/GNG7/PLCB4/CHRNA7/ITPR1/ADCY9/ADCY6/CHRNA3/CACNA1D/HRAS/GNG12/AKT2/PRKACB/CACNA1C/-/PRKCA/MAPK3/KCNJ6/KCNQ1	hsa:9586/hsa:59345/hsa:2770/hsa:3768/hsa:2534/hsa:3760/hsa:2775/hsa:814/hsa:43/hsa:111/hsa:56479/hsa:774/hsa:2353/hsa:5579/hsa:1128/hsa:2791/hsa:54331/hsa:5295/hsa:148327/hsa:3785/hsa:2784/hsa:10681/hsa:10000/hsa:816/hsa:3710/hsa:207/hsa:2783/hsa:3785/hsa:1137/hsa:2786/hsa:10000/hsa:2776/hsa:2771/hsa:2788/hsa:5332/hsa:1139/hsa:3708/hsa:115/hsa:112/hsa:1136/hsa:776/hsa:3845/hsa:55970/hsa:208/hsa:5…	51	29	ENSG00000146592/ENSG00000114450/ENSG00000127955/ENSG00000184185/ENSG00000010810/ENSG00000087258/ENSG00000152495/ENSG00000185760/ENSG00000148408/ENSG00000166501/ENSG00000127920/ENSG00000186469/ENSG00000075043/ENSG00000111664/ENSG00000117020/novel.519/ENSG00000101204/ENSG00000168243/novel.503/ENSG00000176533/ENSG00000175344/ENSG00000080644/ENSG00000172380/ENSG00000142875/ENSG00000151067/novel.387/E…	22	ENSG00000162989/ENSG00000087085/ENSG00000173175/ENSG00000170345/ENSG00000168539/ENSG00000145675/ENSG00000143578/ENSG00000069966/ENSG00000058404/ENSG00000096433/ENSG00000142208/ENSG00000172354/ENSG00000214077/ENSG00000114353/ENSG00000101333/ENSG00000150995/ENSG00000162104/ENSG00000174233/ENSG00000157388/ENSG00000174775/ENSG00000105221/ENSG00000102882
hsa02010	ABC transporters	28|2593	53|9762	4.15306e-05	0.00111094	ENSG00000108846/ENSG00000160179/ENSG00000144452/ENSG00000118777/ENSG00000125257/ENSG00000167972/ENSG00000085563/ENSG00000172350/ENSG00000107331/novel.643/ENSG00000173208/ENSG00000165029/ENSG00000256340/ENSG00000135776/ENSG00000238098/ENSG00000204267/ENSG00000198691/ENSG00000114770/ENSG00000101986/ENSG00000006071/ENSG00000131269/ENSG00000138075/ENSG00000117528/ENSG00000143921/novel.668/ENSG0000012…	ABCC3/ABCG1/ABCA12/ABCG2/ABCC4/ABCA3/ABCB1/ABCG4/ABCA2/-/ABCD2/ABCA1/ABCC6P1/ABCB10/ABCA17P/TAP2/ABCA4/ABCC5/ABCD1/ABCC8/ABCB7/ABCG5/ABCD3/ABCG8/-/ABCC11/ABCB9/ABCB6	hsa:8714/hsa:9619/hsa:26154/hsa:9429/hsa:10257/hsa:21/hsa:5243/hsa:64137/hsa:20/hsa:6891/hsa:225/hsa:19/hsa:368/hsa:23456/hsa:21/hsa:6891/hsa:24/hsa:10057/hsa:215/hsa:6833/hsa:22/hsa:64240/hsa:5825/hsa:64241/hsa:6891/hsa:85320/hsa:23457/hsa:10058	28	13	ENSG00000125257/ENSG00000085563/ENSG00000172350/ENSG00000173208/ENSG00000256340/ENSG00000135776/ENSG00000204267/ENSG00000006071/ENSG00000131269/ENSG00000138075/ENSG00000117528/ENSG00000143921/ENSG00000121270	15	ENSG00000108846/ENSG00000160179/ENSG00000144452/ENSG00000118777/ENSG00000167972/ENSG00000107331/novel.643/ENSG00000165029/ENSG00000238098/ENSG00000198691/ENSG00000114770/ENSG00000101986/novel.668/ENSG00000150967/ENSG00000115657
hsa04540	Gap junction	46|2593	105|9762	9.37514e-05	0.00231494	ENSG00000152661/ENSG00000100311/ENSG00000127955/ENSG00000184845/ENSG00000173175/ENSG00000166501/ENSG00000198121/ENSG00000061918/ENSG00000214796/ENSG00000137285/ENSG00000197461/ENSG00000152402/ENSG00000258947/ENSG00000096433/ENSG00000185532/ENSG00000164116/ENSG00000127824/ENSG00000087460/ENSG00000242575/ENSG00000138669/ENSG00000261456/ENSG00000214077/ENSG00000104833/ENSG00000147246/ENSG00000114353…	GJA1/PDGFB/GNAI1/DRD1/ADCY5/PRKCB/LPAR1/GUCY1B1/AC098934.1/TUBB2B/PDGFA/GUCY1A2/TUBB3/ITPR3/PRKG1/GUCY1A1/TUBA4A/GNAS/AC012501.2/PRKG2/TUBB8/GNAQP1/TUBB4A/HTR2C/GNAI2/PDGFRA/PLCB4/PDGFC/TUBA3E/ITPR1/ADCY9/ADCY6/EGFR/EGF/GRB2/PDGFRB/HRAS/PRKACB/TUBBP2/TUBB4B/PRKCA/TUBB1/TUBAL3/MAPK3/TUBB2BP1/AC008079.2	hsa:2697/hsa:5155/hsa:2770/hsa:1812/hsa:111/hsa:5579/hsa:1902/hsa:2983/hsa:7846/hsa:347733/hsa:5154/hsa:2977/hsa:10381/hsa:3710/hsa:5592/hsa:2982/hsa:7277/hsa:2778/hsa:7846/hsa:5593/hsa:347688/hsa:2776/hsa:10382/hsa:3358/hsa:2771/hsa:5156/hsa:5332/hsa:56034/hsa:112714/hsa:3708/hsa:115/hsa:112/hsa:1956/hsa:1950/hsa:2885/hsa:5159/hsa:3845/hsa:5567/hsa:203068/hsa:10383/hsa:5578/hsa:81027/hsa:79861/h…	46	20	ENSG00000152661/ENSG00000127955/ENSG00000166501/ENSG00000198121/ENSG00000061918/ENSG00000137285/ENSG00000152402/ENSG00000185532/ENSG00000164116/ENSG00000138669/ENSG00000104833/ENSG00000147246/ENSG00000134853/ENSG00000145431/ENSG00000146648/ENSG00000113721/ENSG00000142875/ENSG00000154229/ENSG00000216819/ENSG00000280007	26	ENSG00000100311/ENSG00000184845/ENSG00000173175/ENSG00000214796/ENSG00000197461/ENSG00000258947/ENSG00000096433/ENSG00000127824/ENSG00000087460/ENSG00000242575/ENSG00000261456/ENSG00000214077/ENSG00000114353/ENSG00000101333/ENSG00000152086/ENSG00000150995/ENSG00000162104/ENSG00000174233/ENSG00000138798/ENSG00000177885/ENSG00000174775/ENSG00000214222/ENSG00000188229/ENSG00000101162/ENSG00000178462…
hsa04015	Rap1 signaling pathway	94|2593	253|9762	0.000118347	0.0026086	ENSG00000039068/ENSG00000137801/ENSG00000100311/ENSG00000176884/ENSG00000169860/ENSG00000124171/ENSG00000169242/ENSG00000125968/ENSG00000127955/ENSG00000181104/ENSG00000037280/ENSG00000234456/ENSG00000102755/ENSG00000087258/ENSG00000185386/ENSG00000102981/ENSG00000171517/ENSG00000173175/ENSG00000138685/ENSG00000166501/ENSG00000119630/ENSG00000178372/ENSG00000115825/ENSG00000198121/ENSG00000108984…	CDH1/THBS1/PDGFB/GRIN1/P2RY1/PARD6B/EFNA1/ID1/GNAI1/F2R/FLT4/MAGI2-AS3/FLT1/GNAO1/MAPK11/PARD6A/LPAR3/ADCY5/FGF2/PRKCB/PGF/CALML5/PRKD3/LPAR1/MAP2K6/-/LPAR2/PIK3R1/PLCE1/KIT/ARAP3/PDGFA/VASP/RAP1GAP/FGF5/AKT3/MRAS/DOCK4/EFNA4/FAM238C/RAPGEF4/AKT1/ANGPT1/RRAS/ITGAM/FGF17/PRKD1/GNAS/ADORA2B/LPAR5/VAV2/PFN1P1/EPHA2/-/GNAQP1/IGF1R/RAPGEF5/FGF22/NGFR/GNAI2/BCAR1/ACTBP2/PDGFRA/PLCB4/ACTB/CALML6/SIPA1L3…	hsa:999/hsa:7057/hsa:5155/hsa:2902/hsa:5028/hsa:84612/hsa:1942/hsa:3397/hsa:2770/hsa:2149/hsa:2324/hsa:9863/hsa:2321/hsa:2775/hsa:5600/hsa:50855/hsa:23566/hsa:111/hsa:2247/hsa:5579/hsa:5228/hsa:51806/hsa:23683/hsa:1902/hsa:5608/hsa:9564/hsa:9170/hsa:5295/hsa:51196/hsa:3815/hsa:64411/hsa:5154/hsa:7408/hsa:5909/hsa:2250/hsa:10000/hsa:22808/hsa:9732/hsa:1945/hsa:54518/hsa:11069/hsa:207/hsa:284/hsa:6…	94	40	ENSG00000169860/ENSG00000127955/ENSG00000181104/ENSG00000037280/ENSG00000234456/ENSG00000102755/ENSG00000087258/ENSG00000171517/ENSG00000138685/ENSG00000166501/ENSG00000119630/ENSG00000115825/ENSG00000198121/ENSG00000108984/ENSG00000138193/ENSG00000157404/ENSG00000120318/ENSG00000138675/ENSG00000117020/ENSG00000158186/ENSG00000128512/ENSG00000283709/ENSG00000091428/ENSG00000154188/ENSG00000158815…	54	ENSG00000039068/ENSG00000137801/ENSG00000100311/ENSG00000176884/ENSG00000124171/ENSG00000169242/ENSG00000125968/ENSG00000185386/ENSG00000102981/ENSG00000173175/ENSG00000178372/novel.422/ENSG00000064547/ENSG00000145675/ENSG00000197461/ENSG00000125753/ENSG00000076864/ENSG00000243364/ENSG00000142208/ENSG00000126458/ENSG00000169896/ENSG00000087460/ENSG00000184574/ENSG00000160293/ENSG00000233328/ENSG0…
hsa05205	Proteoglycans in cancer	93|2593	250|9762	0.000121897	0.0026086	ENSG00000137801/ENSG00000091831/ENSG00000065361/ENSG00000188064/ENSG00000147257/ENSG00000128591/ENSG00000111679/ENSG00000164690/ENSG00000026508/ENSG00000145362/ENSG00000128602/ENSG00000147065/ENSG00000178568/ENSG00000114251/ENSG00000124762/ENSG00000128710/ENSG00000185386/ENSG00000124145/ENSG00000122691/ENSG00000092969/ENSG00000138685/ENSG00000166501/ENSG00000115884/ENSG00000233608/ENSG00000110092…	THBS1/ESR1/ERBB3/WNT7B/GPC3/FLNC/PTPN6/SHH/CD44/ANK2/SMO/MSN/ERBB4/WNT5A/CDKN1A/HOXD10/MAPK11/SDC4/TWIST1/TGFB2/FGF2/PRKCB/SDC1/TWIST2/CCND1/AL390719.1/PTCH1/WNT4/PRSS23/PIK3R1/PLCE1/SLC9A1/RPS6KB1/MMP2/AKT3/CAMK2B/CAV1/ITPR3/MRAS/AL645608.9/PAK1/AKT1/RRAS/MMP9/FLNA/PXN/CD63/HSPG2/NUDT16L1/FN1/TLR2/VAV2/PDPK2P/ITGB5/-/CAV3/IGF1R/MSNP1/CTTN/ACTBP2/PPP1CA/ACTB/WNT9A/ITPR1/VEGFA/PLCG1/ITGA5/EGFR/CBL…	hsa:7057/hsa:2099/hsa:2065/hsa:7477/hsa:2719/hsa:2318/hsa:5777/hsa:6469/hsa:960/hsa:287/hsa:6608/hsa:4478/hsa:2066/hsa:7474/hsa:1026/hsa:3236/hsa:5600/hsa:6385/hsa:7291/hsa:7042/hsa:2247/hsa:5579/hsa:6382/hsa:117581/hsa:595/hsa:5781/hsa:5727/hsa:54361/hsa:8322/hsa:5295/hsa:51196/hsa:6548/hsa:6198/hsa:4313/hsa:10000/hsa:816/hsa:857/hsa:3710/hsa:22808/hsa:5781/hsa:5058/hsa:207/hsa:6237/hsa:4318/hsa…	93	33	ENSG00000147257/ENSG00000128591/ENSG00000145362/ENSG00000128602/ENSG00000147065/ENSG00000114251/ENSG00000128710/ENSG00000122691/ENSG00000138685/ENSG00000166501/ENSG00000233608/ENSG00000185920/ENSG00000138193/ENSG00000087245/ENSG00000117020/ENSG00000158186/ENSG00000149269/novel.503/ENSG00000182533/ENSG00000251593/ENSG00000161638/ENSG00000146648/ENSG00000110395/ENSG00000169884/ENSG00000111432/novel…	60	ENSG00000137801/ENSG00000091831/ENSG00000065361/ENSG00000188064/ENSG00000111679/ENSG00000164690/ENSG00000026508/ENSG00000178568/ENSG00000124762/ENSG00000185386/ENSG00000124145/ENSG00000092969/ENSG00000115884/ENSG00000110092/ENSG00000217801/ENSG00000162552/ENSG00000150687/ENSG00000145675/ENSG00000090020/ENSG00000108443/ENSG00000058404/ENSG00000105974/ENSG00000096433/ENSG00000273443/ENSG00000142208…
hsa04625	C-type lectin receptor signaling pathway	47|2593	112|9762	0.000273643	0.00548996	ENSG00000069399/ENSG00000263528/ENSG00000101096/ENSG00000179388/ENSG00000185386/ENSG00000100906/ENSG00000178372/ENSG00000217801/ENSG00000172243/ENSG00000145675/ENSG00000104856/ENSG00000277702/ENSG00000117020/ENSG00000096433/ENSG00000158186/ENSG00000273443/ENSG00000163932/ENSG00000149269/ENSG00000142208/ENSG00000138814/ENSG00000126458/ENSG00000162889/ENSG00000187796/ENSG00000077150/ENSG00000102962…	BCL3/IKBKE/NFATC2/EGR3/MAPK11/NFKBIA/CALML5/AL390719.1/CLEC7A/PIK3R1/RELB/AC239859.6/AKT3/ITPR3/MRAS/AL645608.9/PRKCD/PAK1/AKT1/PPP3CA/RRAS/MAPKAPK2/CARD9/NFKB2/CCL22/-/IL12A/AC006453.2/CYLD/PTGS2/IKBKGP1/CALML6/IL17D/IRF1/ITPR1/AC116050.1/MAP3K14/IKBKG/C1orf147/HRAS/AKT2/MAP3K14-AS1/PYCARD/MAPK3/JUN/MALT1/CALM1	hsa:602/hsa:9641/hsa:4773/hsa:1960/hsa:5600/hsa:4792/hsa:51806/hsa:5781/hsa:64581/hsa:5295/hsa:5971/hsa:4046/hsa:10000/hsa:3710/hsa:22808/hsa:5781/hsa:5580/hsa:5058/hsa:207/hsa:5530/hsa:6237/hsa:9261/hsa:64170/hsa:4791/hsa:6367/hsa:10000/hsa:3592/hsa:4046/hsa:1540/hsa:5743/hsa:8517/hsa:163688/hsa:53342/hsa:3659/hsa:3708/hsa:4046/hsa:9020/hsa:8517/hsa:9641/hsa:3845/hsa:208/hsa:9020/hsa:29108/hsa:5…	47	10	ENSG00000277702/ENSG00000117020/ENSG00000158186/ENSG00000149269/novel.503/ENSG00000168811/ENSG00000083799/ENSG00000073756/ENSG00000177606/ENSG00000172175	37	ENSG00000069399/ENSG00000263528/ENSG00000101096/ENSG00000179388/ENSG00000185386/ENSG00000100906/ENSG00000178372/ENSG00000217801/ENSG00000172243/ENSG00000145675/ENSG00000104856/ENSG00000096433/ENSG00000273443/ENSG00000163932/ENSG00000142208/ENSG00000138814/ENSG00000126458/ENSG00000162889/ENSG00000187796/ENSG00000077150/ENSG00000102962/ENSG00000283196/ENSG00000275882/ENSG00000169885/ENSG00000172458…
hsa04726	Serotonergic synapse	47|2593	113|9762	0.000349542	0.00660018	ENSG00000161905/ENSG00000114450/ENSG00000127955/ENSG00000162989/ENSG00000087258/ENSG00000173175/ENSG00000095303/ENSG00000148408/ENSG00000166501/ENSG00000168907/ENSG00000127920/ENSG00000108576/ENSG00000116711/ENSG00000186469/ENSG00000179546/ENSG00000111664/ENSG00000069966/ENSG00000096433/ENSG00000080709/ENSG00000172354/ENSG00000087460/ENSG00000168243/ENSG00000214077/ENSG00000144935/ENSG00000147246…	ALOX15/GNB4/GNAI1/KCNJ3/GNAO1/ADCY5/PTGS1/CACNA1B/PRKCB/PLA2G4F/GNG11/SLC6A4/PLA2G4A/GNG2/HTR1D/GNB3/GNB5/ITPR3/KCNN2/GNB2/GNAS/GNG4/GNAQP1/TRPC1/HTR2C/GNAI2/CYP4X1/PTGS2/GNG7/PLCB4/TPH1/ITPR1/CYP2C9/PLA2G4C/HTR7P1/CACNA1D/HRAS/GNG12/PRKACB/CACNA1C/ARAF/AL391988.1/PRKCA/HTR6/MAPK3/KCNJ6/ALOX15B	hsa:246/hsa:59345/hsa:2770/hsa:3760/hsa:2775/hsa:111/hsa:5742/hsa:774/hsa:5579/hsa:255189/hsa:2791/hsa:6532/hsa:5321/hsa:54331/hsa:3352/hsa:2784/hsa:10681/hsa:3710/hsa:3781/hsa:2783/hsa:2778/hsa:2786/hsa:2776/hsa:7220/hsa:3358/hsa:2771/hsa:260293/hsa:5743/hsa:2788/hsa:5332/hsa:7166/hsa:3708/hsa:1559/hsa:8605/hsa:3363/hsa:776/hsa:3845/hsa:55970/hsa:5567/hsa:775/hsa:369/hsa:6571/hsa:5578/hsa:3362/h…	47	26	ENSG00000114450/ENSG00000127955/ENSG00000087258/ENSG00000148408/ENSG00000166501/ENSG00000127920/ENSG00000108576/ENSG00000116711/ENSG00000186469/ENSG00000111664/ENSG00000168243/ENSG00000144935/ENSG00000147246/ENSG00000186377/ENSG00000073756/ENSG00000176533/ENSG00000129167/ENSG00000138109/ENSG00000172380/ENSG00000142875/ENSG00000151067/ENSG00000277879/ENSG00000154229/ENSG00000158748/ENSG00000157542…	21	ENSG00000161905/ENSG00000162989/ENSG00000173175/ENSG00000095303/ENSG00000168907/ENSG00000179546/ENSG00000069966/ENSG00000096433/ENSG00000080709/ENSG00000172354/ENSG00000087460/ENSG00000214077/ENSG00000114353/ENSG00000101333/ENSG00000150995/ENSG00000105499/ENSG00000183935/ENSG00000157388/ENSG00000174775/ENSG00000078061/ENSG00000102882
hsa05224	Breast cancer	62|2593	159|9762	0.000379541	0.0067165	ENSG00000091831/ENSG00000188064/ENSG00000164683/ENSG00000124151/ENSG00000114251/ENSG00000124762/ENSG00000037280/ENSG00000082175/ENSG00000138795/ENSG00000170345/ENSG00000138685/ENSG00000081059/ENSG00000099860/ENSG00000110092/ENSG00000090932/ENSG00000130222/ENSG00000162552/ENSG00000150687/ENSG00000145675/ENSG00000157404/ENSG00000108443/ENSG00000138675/ENSG00000117020/ENSG00000074181/ENSG00000142208…	ESR1/WNT7B/HEY1/NCOA3/WNT5A/CDKN1A/FLT4/PGR/LEF1/FOS/FGF2/TCF7/GADD45B/CCND1/DLL3/GADD45G/WNT4/PRSS23/PIK3R1/KIT/RPS6KB1/FGF5/AKT3/NOTCH3/AKT1/HEYL/FGF17/NFKB2/JAG1/-/JAG2/IGF1R/FGF22/LRP5/NOTCH1/PTENP1/FRAT1/WNT9A/POLK/HES1/FGF9/FGF18/EGFR/BRCA1/EGF/WNT10B/DLL4/GRB2/FZD10/DDB2/-/SHC1/HRAS/AKT2/ARAF/WNT3A/MAPK3/DVL3/FZD3/FZD5/ERBB2/JUN	hsa:2099/hsa:7477/hsa:23462/hsa:8202/hsa:7474/hsa:1026/hsa:2324/hsa:5241/hsa:51176/hsa:2353/hsa:2247/hsa:6932/hsa:4616/hsa:595/hsa:10683/hsa:10912/hsa:54361/hsa:8322/hsa:5295/hsa:3815/hsa:6198/hsa:2250/hsa:10000/hsa:4854/hsa:207/hsa:26508/hsa:8822/hsa:4791/hsa:182/hsa:10000/hsa:3714/hsa:3480/hsa:27006/hsa:4041/hsa:4851/hsa:5728/hsa:10023/hsa:7483/hsa:51426/hsa:3280/hsa:2254/hsa:8817/hsa:1956/hsa:…	62	24	ENSG00000164683/ENSG00000114251/ENSG00000037280/ENSG00000138795/ENSG00000138685/ENSG00000081059/ENSG00000090932/ENSG00000157404/ENSG00000138675/ENSG00000117020/ENSG00000163909/ENSG00000158815/novel.503/ENSG00000237984/ENSG00000122008/ENSG00000102678/ENSG00000146648/ENSG00000012048/ENSG00000169884/ENSG00000111432/novel.453/ENSG00000154342/ENSG00000104290/ENSG00000177606	38	ENSG00000091831/ENSG00000188064/ENSG00000124151/ENSG00000124762/ENSG00000082175/ENSG00000170345/ENSG00000099860/ENSG00000110092/ENSG00000130222/ENSG00000162552/ENSG00000150687/ENSG00000145675/ENSG00000108443/ENSG00000074181/ENSG00000142208/ENSG00000077150/ENSG00000101384/ENSG00000184916/ENSG00000140443/ENSG00000070388/ENSG00000162337/ENSG00000148400/ENSG00000165879/ENSG00000143816/ENSG00000114315…
hsa04727	GABAergic synapse	38|2593	87|9762	0.00039755	0.0067165	ENSG00000183044/ENSG00000114450/ENSG00000127955/ENSG00000087258/ENSG00000173175/ENSG00000148408/ENSG00000166501/ENSG00000124140/ENSG00000132164/ENSG00000011677/ENSG00000127920/ENSG00000186469/ENSG00000111664/ENSG00000102287/ENSG00000069966/ENSG00000010379/ENSG00000115896/ENSG00000139112/ENSG00000172354/ENSG00000168243/ENSG00000114353/ENSG00000188338/ENSG00000176533/ENSG00000157103/ENSG00000111371…	ABAT/GNB4/GNAI1/GNAO1/ADCY5/CACNA1B/PRKCB/SLC12A5/SLC6A11/GABRA3/GNG11/GNG2/GNB3/GABRE/GNB5/SLC6A13/PLCL1/GABARAPL1/GNB2/GNG4/GNAI2/SLC38A3/GNG7/SLC6A1/SLC38A1/ADCY9/ADCY6/NSFP1/GAD2/CACNA1D/GABRR2/GABRD/GNG12/PRKACB/CACNA1C/PRKCA/KCNJ6/-	hsa:18/hsa:59345/hsa:2770/hsa:2775/hsa:111/hsa:774/hsa:5579/hsa:57468/hsa:6538/hsa:2556/hsa:2791/hsa:54331/hsa:2784/hsa:2564/hsa:10681/hsa:6540/hsa:5334/hsa:23710/hsa:2783/hsa:2786/hsa:2771/hsa:10991/hsa:2788/hsa:6529/hsa:81539/hsa:115/hsa:112/hsa:4905/hsa:2572/hsa:776/hsa:2570/hsa:2563/hsa:55970/hsa:5567/hsa:775/hsa:5578/hsa:3763/hsa:4905	38	26	ENSG00000114450/ENSG00000127955/ENSG00000087258/ENSG00000148408/ENSG00000166501/ENSG00000132164/ENSG00000011677/ENSG00000127920/ENSG00000186469/ENSG00000111664/ENSG00000102287/ENSG00000010379/ENSG00000115896/ENSG00000139112/ENSG00000168243/ENSG00000188338/ENSG00000176533/ENSG00000157103/ENSG00000260075/ENSG00000136750/ENSG00000111886/ENSG00000172380/ENSG00000142875/ENSG00000151067/ENSG00000154229…	12	ENSG00000183044/ENSG00000173175/ENSG00000124140/ENSG00000069966/ENSG00000172354/ENSG00000114353/ENSG00000111371/ENSG00000162104/ENSG00000174233/ENSG00000157388/ENSG00000187730/novel.436
hsa05146	Amoebiasis	41|2593	96|9762	0.000423985	0.00680496	ENSG00000134871/ENSG00000050555/ENSG00000196878/ENSG00000168542/ENSG00000197565/ENSG00000106211/ENSG00000091136/ENSG00000141404/ENSG00000115594/ENSG00000101680/ENSG00000187498/ENSG00000156049/ENSG00000092969/ENSG00000166501/ENSG00000081181/ENSG00000007171/ENSG00000112769/novel.276/ENSG00000188153/ENSG00000145675/ENSG00000130702/ENSG00000196569/ENSG00000169896/ENSG00000169429/ENSG00000170542/ENSG0…	COL4A2/LAMC3/LAMB3/COL3A1/COL4A6/HSPB1/LAMB1/GNAL/IL1R1/LAMA1/COL4A1/GNA14/TGFB2/PRKCB/ARG2/NOS2/LAMA4/-/COL4A5/PIK3R1/LAMA5/LAMA2/ITGAM/CXCL8/SERPINB9/GNAS/TGFB3/FN1/TLR2/GNAQP1/IL12A/LAMC2/HSPB1P1/LAMB2/PLCB4/ACTN1/RAB5B/LAMA3/VCL/PRKACB/PRKCA	hsa:1284/hsa:10319/hsa:3914/hsa:1281/hsa:1288/hsa:3315/hsa:3912/hsa:2774/hsa:3554/hsa:284217/hsa:1282/hsa:9630/hsa:7042/hsa:5579/hsa:384/hsa:4843/hsa:3910/hsa:81/hsa:1287/hsa:5295/hsa:3911/hsa:3908/hsa:3684/hsa:3576/hsa:5272/hsa:2778/hsa:7043/hsa:2335/hsa:7097/hsa:2776/hsa:3592/hsa:3918/hsa:3315/hsa:3913/hsa:5332/hsa:87/hsa:5869/hsa:3909/hsa:7414/hsa:5567/hsa:5578	41	18	ENSG00000134871/ENSG00000050555/ENSG00000197565/ENSG00000091136/ENSG00000141404/ENSG00000101680/ENSG00000187498/ENSG00000166501/ENSG00000081181/ENSG00000007171/ENSG00000112769/ENSG00000188153/ENSG00000196569/ENSG00000168811/ENSG00000053747/ENSG00000035403/ENSG00000142875/ENSG00000154229	23	ENSG00000196878/ENSG00000168542/ENSG00000106211/ENSG00000115594/ENSG00000156049/ENSG00000092969/novel.276/ENSG00000145675/ENSG00000130702/ENSG00000169896/ENSG00000169429/ENSG00000170542/ENSG00000087460/ENSG00000119699/ENSG00000115414/ENSG00000137462/ENSG00000214077/ENSG00000058085/ENSG00000236060/ENSG00000172037/ENSG00000101333/ENSG00000072110/ENSG00000111540
hsa05032	Morphine addiction	35|2593	79|9762	0.000480847	0.00712171	ENSG00000114450/ENSG00000127955/ENSG00000162989/ENSG00000087258/ENSG00000184845/ENSG00000173175/ENSG00000148408/ENSG00000166501/ENSG00000011677/ENSG00000127920/ENSG00000186469/ENSG00000111664/ENSG00000102287/ENSG00000069966/ENSG00000172354/ENSG00000087460/ENSG00000198873/ENSG00000168243/ENSG00000114353/ENSG00000100077/ENSG00000176533/ENSG00000184588/ENSG00000113231/ENSG00000162104/ENSG00000174233…	GNB4/GNAI1/KCNJ3/GNAO1/DRD1/ADCY5/CACNA1B/PRKCB/GABRA3/GNG11/GNG2/GNB3/GABRE/GNB5/GNB2/GNAS/GRK5/GNG4/GNAI2/GRK3/GNG7/PDE4B/PDE8B/ADCY9/ADCY6/GRK2/ARRB1/PDE11A/GABRR2/GABRD/GNG12/PRKACB/PRKCA/KCNJ6/PDE1B	hsa:59345/hsa:2770/hsa:3760/hsa:2775/hsa:1812/hsa:111/hsa:774/hsa:5579/hsa:2556/hsa:2791/hsa:54331/hsa:2784/hsa:2564/hsa:10681/hsa:2783/hsa:2778/hsa:2869/hsa:2786/hsa:2771/hsa:157/hsa:2788/hsa:5142/hsa:8622/hsa:115/hsa:112/hsa:156/hsa:408/hsa:50940/hsa:2570/hsa:2563/hsa:55970/hsa:5567/hsa:5578/hsa:3763/hsa:5153	35	23	ENSG00000114450/ENSG00000127955/ENSG00000087258/ENSG00000148408/ENSG00000166501/ENSG00000011677/ENSG00000127920/ENSG00000186469/ENSG00000111664/ENSG00000102287/ENSG00000198873/ENSG00000168243/ENSG00000100077/ENSG00000176533/ENSG00000184588/ENSG00000113231/ENSG00000128655/ENSG00000111886/ENSG00000172380/ENSG00000142875/ENSG00000154229/ENSG00000157542/ENSG00000123360	12	ENSG00000162989/ENSG00000184845/ENSG00000173175/ENSG00000069966/ENSG00000172354/ENSG00000087460/ENSG00000114353/ENSG00000162104/ENSG00000174233/ENSG00000173020/ENSG00000137486/ENSG00000187730
hsa04810	Regulation of actin cytoskeleton	98|2593	275|9762	0.000488092	0.00712171	ENSG00000100311/ENSG00000006747/ENSG00000132470/ENSG00000145703/ENSG00000107562/ENSG00000213949/ENSG00000147065/ENSG00000205542/ENSG00000127084/ENSG00000187653/ENSG00000115221/ENSG00000181104/ENSG00000168398/ENSG00000005884/ENSG00000115232/ENSG00000129675/ENSG00000138685/ENSG00000172830/ENSG00000198121/ENSG00000168539/novel.276/ENSG00000101608/novel.422/ENSG00000118680/ENSG00000064547/ENSG0000018…	PDGFB/SCIN/ITGB4/IQGAP2/CXCL12/ITGA1/MSN/TMSB4X/FGD3/TMSB4XP8/ITGB6/F2R/BDKRB2/ITGA3/ITGA4/ARHGEF6/FGF2/SSH3/LPAR1/CHRM1/-/MYL12A/-/MYL12B/LPAR2/SPATA13/GSN/PIK3R1/ITGA8/SLC9A1/PDGFA/MYH10/ITGA9/CXCR4/FGF5/MRAS/PAK1/RRAS/ITGAM/ARPC1B/FGF17/PXN/PAK3/WASF1/MYH9/LPAR5/FN1/MYH14/VAV2/PFN1P1/PAK4/ITGB5/ARPC4/FGF22/MSNP1/BCAR1/ACTBP2/PDGFRA/PPP1CA/CFL2/DIAPH3/ARHGAP35/ACTB/ITGA6/PIP4K2C/ACTN1/FGD1/PDGF…	hsa:5155/hsa:85477/hsa:3691/hsa:10788/hsa:6387/hsa:3672/hsa:4478/hsa:7114/hsa:89846/hsa:7114/hsa:3694/hsa:2149/hsa:624/hsa:3675/hsa:3676/hsa:9459/hsa:2247/hsa:54961/hsa:1902/hsa:1128/hsa:81/hsa:10627/hsa:9564/hsa:103910/hsa:9170/hsa:221178/hsa:2934/hsa:5295/hsa:8516/hsa:6548/hsa:5154/hsa:4628/hsa:3680/hsa:7852/hsa:2250/hsa:22808/hsa:5058/hsa:6237/hsa:3684/hsa:10095/hsa:8822/hsa:5829/hsa:5063/hsa:…	98	37	ENSG00000145703/ENSG00000213949/ENSG00000147065/ENSG00000181104/ENSG00000115232/ENSG00000129675/ENSG00000138685/ENSG00000198121/ENSG00000077943/ENSG00000133026/ENSG00000144668/ENSG00000138675/ENSG00000158186/ENSG00000149269/ENSG00000158815/ENSG00000077264/ENSG00000112290/ENSG00000251593/ENSG00000134853/ENSG00000165410/ENSG00000139734/ENSG00000091409/ENSG00000102302/ENSG00000145431/ENSG00000154380…	61	ENSG00000100311/ENSG00000006747/ENSG00000132470/ENSG00000107562/ENSG00000205542/ENSG00000127084/ENSG00000187653/ENSG00000115221/ENSG00000168398/ENSG00000005884/ENSG00000172830/ENSG00000168539/novel.276/ENSG00000101608/novel.422/ENSG00000118680/ENSG00000064547/ENSG00000182957/ENSG00000148180/ENSG00000145675/ENSG00000090020/ENSG00000197461/ENSG00000121966/ENSG00000126458/ENSG00000169896/ENSG0000013…
hsa04151	PI3K-Akt signaling pathway	135|2593	400|9762	0.000695708	0.00970966	ENSG00000137801/ENSG00000065361/ENSG00000100311/ENSG00000134871/ENSG00000132470/ENSG00000162409/ENSG00000146592/ENSG00000050555/ENSG00000118971/ENSG00000196878/ENSG00000163235/ENSG00000213949/ENSG00000169242/ENSG00000197565/ENSG00000091136/ENSG00000113494/ENSG00000114450/ENSG00000178568/ENSG00000124762/ENSG00000115221/ENSG00000181104/ENSG00000037280/ENSG00000101680/ENSG00000187498/ENSG00000234456…	THBS1/ERBB3/PDGFB/COL4A2/ITGB4/PRKAA2/CREB5/LAMC3/CCND2/LAMB3/TGFA/ITGA1/EFNA1/COL4A6/LAMB1/PRLR/GNB4/ERBB4/CDKN1A/ITGB6/F2R/FLT4/LAMA1/COL4A1/MAGI2-AS3/FLT1/ITGA3/ITGA4/IRS1/LPAR3/FGF2/PGF/LAMA4/LPAR1/CHRM1/CCND1/COL4A5/GNG11/RXRA/LPAR2/PPP2R2C/GNG2/PIK3R1/KIT/ITGA8/CREB3L4/LAMA5/RPS6KB1/PDGFA/-/COL2A1/CD19/ITGA9/GNB3/LAMA2/GNB5/FGF5/AKT3/EFNA4/AKT1/ANGPT1/COMP/THBS4/AREG/OSMR/FGF17/GNB2/MYB/DDI…	hsa:7057/hsa:2065/hsa:5155/hsa:1284/hsa:3691/hsa:5563/hsa:9586/hsa:10319/hsa:894/hsa:3914/hsa:7039/hsa:3672/hsa:1942/hsa:1288/hsa:3912/hsa:5618/hsa:59345/hsa:2066/hsa:1026/hsa:3694/hsa:2149/hsa:2324/hsa:284217/hsa:1282/hsa:9863/hsa:2321/hsa:3675/hsa:3676/hsa:3667/hsa:23566/hsa:2247/hsa:5228/hsa:3910/hsa:1902/hsa:1128/hsa:595/hsa:1287/hsa:2791/hsa:6256/hsa:9170/hsa:5522/hsa:54331/hsa:5295/hsa:3815…	135	65	ENSG00000134871/ENSG00000162409/ENSG00000146592/ENSG00000050555/ENSG00000118971/ENSG00000213949/ENSG00000197565/ENSG00000091136/ENSG00000114450/ENSG00000181104/ENSG00000037280/ENSG00000101680/ENSG00000187498/ENSG00000234456/ENSG00000102755/ENSG00000115232/ENSG00000171517/ENSG00000138685/ENSG00000119630/ENSG00000112769/ENSG00000198121/ENSG00000188153/ENSG00000127920/ENSG00000186469/ENSG00000157404…	70	ENSG00000137801/ENSG00000065361/ENSG00000100311/ENSG00000132470/ENSG00000196878/ENSG00000163235/ENSG00000169242/ENSG00000113494/ENSG00000178568/ENSG00000124762/ENSG00000115221/ENSG00000005884/ENSG00000169047/ENSG00000168539/ENSG00000110092/ENSG00000186350/ENSG00000064547/ENSG00000074211/ENSG00000145675/ENSG00000143578/ENSG00000130702/ENSG00000108443/ENSG00000197461/novel.641/ENSG00000069966/ENSG0…
hsa04024	cAMP signaling pathway	81|2593	223|9762	0.00076045	0.010171	ENSG00000196917/ENSG00000146592/ENSG00000176884/ENSG00000074370/ENSG00000127955/ENSG00000050628/ENSG00000181104/ENSG00000164128/ENSG00000078401/ENSG00000184845/ENSG00000152495/ENSG00000173175/ENSG00000170345/ENSG00000100906/ENSG00000125257/ENSG00000178372/ENSG00000168539/ENSG00000185920/ENSG00000078549/ENSG00000145675/ENSG00000106018/ENSG00000138193/ENSG00000099822/ENSG00000120318/ENSG00000090020…	HCAR1/CREB5/GRIN1/ATP2A3/GNAI1/PTGER3/F2R/NPY1R/EDN1/DRD1/CAMK4/ADCY5/FOS/NFKBIA/ABCC4/CALML5/CHRM1/PTCH1/ADCYAP1R1/PIK3R1/VIPR2/PLCE1/HCN2/ARAP3/SLC9A1/CREB3L4/LIPE/ATP1B2/HTR1D/EDN2/ATP1B1/AKT3/CAMK2B/PAK1/RAPGEF4/AKT1/RRAS/ATP1A1-AS1/SSTR2/HCAR3/GNAS/HCAR2/PPARA/VAV2/-/HHIP-AS1/GNAI2/BDNF-AS/PPP1CA/NPY/TSHR/CALML6/GRIN3A/PDE4B/GLI1/ADCY9/ADCY6/AFDN/ATP2B4/ADCY10P1/SSTR5/AL161729.1/CACNA1D/ACOX…	hsa:27198/hsa:9586/hsa:2902/hsa:489/hsa:2770/hsa:5733/hsa:2149/hsa:4886/hsa:1906/hsa:1812/hsa:814/hsa:111/hsa:2353/hsa:4792/hsa:10257/hsa:51806/hsa:1128/hsa:5727/hsa:117/hsa:5295/hsa:7434/hsa:51196/hsa:610/hsa:64411/hsa:6548/hsa:148327/hsa:3991/hsa:482/hsa:3352/hsa:1907/hsa:481/hsa:10000/hsa:816/hsa:5058/hsa:11069/hsa:207/hsa:6237/hsa:476/hsa:6752/hsa:8843/hsa:2778/hsa:338442/hsa:5465/hsa:7410/hs…	81	36	ENSG00000146592/ENSG00000127955/ENSG00000181104/ENSG00000152495/ENSG00000125257/ENSG00000185920/ENSG00000078549/ENSG00000138193/ENSG00000120318/ENSG00000079435/ENSG00000129244/ENSG00000117020/ENSG00000149269/ENSG00000091428/ENSG00000180616/ENSG00000186951/novel.503/ENSG00000248890/ENSG00000245573/ENSG00000122585/ENSG00000165409/ENSG00000198785/ENSG00000184588/ENSG00000111087/ENSG00000130396/ENSG0…	45	ENSG00000196917/ENSG00000176884/ENSG00000074370/ENSG00000050628/ENSG00000164128/ENSG00000078401/ENSG00000184845/ENSG00000173175/ENSG00000170345/ENSG00000100906/ENSG00000178372/ENSG00000168539/ENSG00000145675/ENSG00000106018/ENSG00000099822/ENSG00000090020/ENSG00000143578/ENSG00000179546/ENSG00000127129/ENSG00000143153/ENSG00000058404/ENSG00000142208/ENSG00000126458/ENSG00000203865/ENSG00000255398…
hsa04933	AGE-RAGE signaling pathway in diabetic complications	43|2593	105|9762	0.00089814	0.0115321	ENSG00000134871/ENSG00000090339/ENSG00000178726/ENSG00000168542/ENSG00000197565/ENSG00000187498/ENSG00000078401/ENSG00000185386/ENSG00000092969/ENSG00000166501/ENSG00000110092/ENSG00000188153/ENSG00000145675/ENSG00000138193/ENSG00000126561/ENSG00000087245/ENSG00000120738/ENSG00000117020/ENSG00000163932/ENSG00000142208/ENSG00000169429/ENSG00000108691/ENSG00000119699/ENSG00000115414/ENSG00000111276…	COL4A2/ICAM1/THBD/COL3A1/COL4A6/COL4A1/EDN1/MAPK11/TGFB2/PRKCB/CCND1/COL4A5/PIK3R1/PLCE1/STAT5A/MMP2/EGR1/AKT3/PRKCD/AKT1/CXCL8/CCL2/TGFB3/FN1/CDKN1B/AGTR1/-/SMAD3/PLCD3/FOXO1/PLCB4/VEGFD/FOXO1B/VEGFA/NOX1/PLCG1/HRAS/AKT2/PRKCA/MAPK3/SERPINE1/JUN/VEGFC	hsa:1284/hsa:3383/hsa:7056/hsa:1281/hsa:1288/hsa:1282/hsa:1906/hsa:5600/hsa:7042/hsa:5579/hsa:595/hsa:1287/hsa:5295/hsa:51196/hsa:6776/hsa:4313/hsa:1958/hsa:10000/hsa:5580/hsa:207/hsa:3576/hsa:6347/hsa:7043/hsa:2335/hsa:1027/hsa:185/hsa:10000/hsa:4088/hsa:113026/hsa:2308/hsa:5332/hsa:2277/hsa:2308/hsa:7422/hsa:27035/hsa:5335/hsa:3845/hsa:208/hsa:5578/hsa:5595/hsa:5054/hsa:3725/hsa:7424	43	16	ENSG00000134871/ENSG00000197565/ENSG00000187498/ENSG00000166501/ENSG00000188153/ENSG00000138193/ENSG00000087245/ENSG00000117020/ENSG00000144891/novel.503/ENSG00000150907/ENSG00000165197/ENSG00000214295/ENSG00000007952/ENSG00000154229/ENSG00000177606	27	ENSG00000090339/ENSG00000178726/ENSG00000168542/ENSG00000078401/ENSG00000185386/ENSG00000092969/ENSG00000110092/ENSG00000145675/ENSG00000126561/ENSG00000120738/ENSG00000163932/ENSG00000142208/ENSG00000169429/ENSG00000108691/ENSG00000119699/ENSG00000115414/ENSG00000111276/ENSG00000166949/ENSG00000161714/ENSG00000101333/ENSG00000112715/ENSG00000124181/ENSG00000174775/ENSG00000105221/ENSG00000102882…
hsa04010	MAPK signaling pathway	120|2593	353|9762	0.00100048	0.012129	ENSG00000065361/ENSG00000075461/ENSG00000100311/ENSG00000128591/ENSG00000172936/ENSG00000163235/ENSG00000169242/ENSG00000106211/ENSG00000178568/ENSG00000158050/ENSG00000115594/ENSG00000037280/ENSG00000102755/ENSG00000185386/ENSG00000120875/ENSG00000182389/ENSG00000148408/ENSG00000153956/ENSG00000170345/ENSG00000196557/ENSG00000092969/ENSG00000138685/ENSG00000166501/ENSG00000168907/ENSG00000119630…	ERBB3/CACNG4/PDGFB/FLNC/MYD88/TGFA/EFNA1/HSPB1/ERBB4/DUSP2/IL1R1/FLT4/FLT1/MAPK11/DUSP4/CACNB4/CACNA1B/CACNA2D1/FOS/CACNA1H/TGFB2/FGF2/PRKCB/PLA2G4F/PGF/RPS6KA6/GADD45B/MAP2K6/CACNB3/GADD45G/PLA2G4A/MEF2C/KIT/PDGFA/RASGRF2/RELB/HSPA6/MAP3K8/JUND/FGF5/AKT3/CACNA2D3/MRAS/PAK1/EFNA4/TNFRSF1A/AKT1/PPP3CA/CACNG8/ANGPT1/RRAS/AREG/FLNA/-/CACNA1I/FGF17/MAPKAPK2/DUSP9/PTPN5/NFKB2/TGFB3/CACNB2/EPHA2/-/IGF1…	hsa:2065/hsa:27092/hsa:5155/hsa:2318/hsa:4615/hsa:7039/hsa:1942/hsa:3315/hsa:2066/hsa:1844/hsa:3554/hsa:2324/hsa:2321/hsa:5600/hsa:1846/hsa:785/hsa:774/hsa:781/hsa:2353/hsa:8912/hsa:7042/hsa:2247/hsa:5579/hsa:255189/hsa:5228/hsa:27330/hsa:4616/hsa:5608/hsa:784/hsa:10912/hsa:5321/hsa:4208/hsa:3815/hsa:5154/hsa:5924/hsa:5971/hsa:3310/hsa:1326/hsa:3727/hsa:2250/hsa:10000/hsa:55799/hsa:22808/hsa:5058…	120	47	ENSG00000128591/ENSG00000037280/ENSG00000102755/ENSG00000182389/ENSG00000148408/ENSG00000153956/ENSG00000138685/ENSG00000166501/ENSG00000119630/ENSG00000072133/ENSG00000108984/ENSG00000116711/ENSG00000081189/ENSG00000157404/ENSG00000113319/ENSG00000138675/ENSG00000117020/ENSG00000157445/ENSG00000158186/ENSG00000149269/ENSG00000142408/ENSG00000154188/ENSG00000158815/ENSG00000130829/ENSG00000110786…	73	ENSG00000065361/ENSG00000075461/ENSG00000100311/ENSG00000172936/ENSG00000163235/ENSG00000169242/ENSG00000106211/ENSG00000178568/ENSG00000158050/ENSG00000115594/ENSG00000185386/ENSG00000120875/ENSG00000170345/ENSG00000196557/ENSG00000092969/ENSG00000168907/ENSG00000099860/ENSG00000167535/ENSG00000130222/ENSG00000197461/ENSG00000104856/ENSG00000173110/ENSG00000107968/ENSG00000130522/ENSG00000243364…
hsa05206	MicroRNAs in cancer	72|2593	196|9762	0.0010202	0.012129	ENSG00000137801/ENSG00000159217/ENSG00000065361/ENSG00000149418/ENSG00000100311/ENSG00000147889/ENSG00000138061/ENSG00000026508/ENSG00000118971/ENSG00000148516/ENSG00000169242/ENSG00000124762/ENSG00000128710/ENSG00000169554/ENSG00000169047/ENSG00000092969/ENSG00000104081/ENSG00000166501/ENSG00000169946/ENSG00000110092/ENSG00000185338/ENSG00000073282/ENSG00000085563/ENSG00000145675/ENSG00000277443…	THBS1/IGF2BP1/ERBB3/ST14/PDGFB/CDKN2A/CYP1B1/CD44/CCND2/ZEB1/EFNA1/CDKN1A/HOXD10/ZEB2/IRS1/TGFB2/BMF/PRKCB/ZFPM2/CCND1/SOCS1/TP63/ABCB1/PIK3R1/MARCKS/PDGFA/RECK/NOTCH3/EFNA4/TRIM71/ATM/TPM1/CDC25A/MMP9/DDIT4/CDKN1B/CYP24A1/PAK4/VIM/CCNG1/MMP16/HMOX1/SPRY2/SERPINB5/PDGFRA/PTGS2/HDAC2/NOTCH1/PTENP1/TNC/EFNA3/VEGFA/CDC25B/PLCG1/ITGA5/EGFR/BRCA1/GRB2/PDGFRB/-/HDAC1/SHC1/SLC12A5-AS1/HRAS/CDC25C/TIMP3/…	hsa:7057/hsa:10642/hsa:2065/hsa:6768/hsa:5155/hsa:1029/hsa:1545/hsa:960/hsa:894/hsa:6935/hsa:1942/hsa:1026/hsa:3236/hsa:9839/hsa:3667/hsa:7042/hsa:90427/hsa:5579/hsa:23414/hsa:595/hsa:8651/hsa:8626/hsa:5243/hsa:5295/hsa:4082/hsa:5154/hsa:8434/hsa:4854/hsa:1945/hsa:131405/hsa:472/hsa:7168/hsa:993/hsa:4318/hsa:54541/hsa:1027/hsa:1591/hsa:10298/hsa:7431/hsa:900/hsa:4325/hsa:3162/hsa:10253/hsa:5268/h…	72	34	ENSG00000159217/ENSG00000147889/ENSG00000118971/ENSG00000148516/ENSG00000128710/ENSG00000169554/ENSG00000166501/ENSG00000169946/ENSG00000085563/ENSG00000277443/ENSG00000122707/ENSG00000206557/ENSG00000149311/ENSG00000164045/ENSG00000113328/ENSG00000100292/ENSG00000136158/ENSG00000134853/ENSG00000073756/ENSG00000196591/ENSG00000237984/ENSG00000041982/ENSG00000161638/ENSG00000146648/ENSG00000012048…	38	ENSG00000137801/ENSG00000065361/ENSG00000149418/ENSG00000100311/ENSG00000138061/ENSG00000026508/ENSG00000169242/ENSG00000124762/ENSG00000169047/ENSG00000092969/ENSG00000104081/ENSG00000110092/ENSG00000185338/ENSG00000073282/ENSG00000145675/ENSG00000197461/ENSG00000074181/ENSG00000243364/ENSG00000140416/ENSG00000100985/ENSG00000168209/ENSG00000111276/ENSG00000019186/ENSG00000130669/ENSG00000026025…
hsa05414	Dilated cardiomyopathy (DCM)	47|2593	118|9762	0.00108781	0.0124709	ENSG00000075461/ENSG00000132470/ENSG00000102683/ENSG00000074370/ENSG00000213949/ENSG00000115221/ENSG00000101680/ENSG00000005884/ENSG00000115232/ENSG00000182389/ENSG00000173175/ENSG00000153956/ENSG00000092969/ENSG00000183023/ENSG00000167535/ENSG00000198947/ENSG00000160789/ENSG00000077943/ENSG00000155657/ENSG00000144668/ENSG00000196569/ENSG00000157445/ENSG00000142408/ENSG00000140416/ENSG00000087460…	CACNG4/ITGB4/SGCG/ATP2A3/ITGA1/ITGB6/LAMA1/ITGA3/ITGA4/CACNB4/ADCY5/CACNA2D1/TGFB2/SLC8A1/CACNB3/DMD/LMNA/ITGA8/TTN/ITGA9/LAMA2/CACNA2D3/CACNG8/TPM1/GNAS/TGFB3/CACNB2/ITGB5/SLC8A3/ACTBP2/ACTB/ITGA6/ITGB7/ADCY9/ADCY6/ITGA5/CACNG1/CACNA1D/TTN-AS1/AC098934.2/CACNA2D2/DAG1/TPM3P9/PRKACB/CACNA1C/TPM4/SGCB	hsa:27092/hsa:3691/hsa:6445/hsa:489/hsa:3672/hsa:3694/hsa:284217/hsa:3675/hsa:3676/hsa:785/hsa:111/hsa:781/hsa:7042/hsa:6546/hsa:784/hsa:1756/hsa:4000/hsa:8516/hsa:7273/hsa:3680/hsa:3908/hsa:55799/hsa:59283/hsa:7168/hsa:2778/hsa:7043/hsa:783/hsa:3693/hsa:6547/hsa:60/hsa:60/hsa:3655/hsa:3695/hsa:115/hsa:112/hsa:3678/hsa:786/hsa:776/hsa:7273/hsa:71/hsa:9254/hsa:1605/hsa:7171/hsa:5567/hsa:775/hsa:71…	47	22	ENSG00000213949/ENSG00000101680/ENSG00000115232/ENSG00000182389/ENSG00000153956/ENSG00000183023/ENSG00000198947/ENSG00000077943/ENSG00000155657/ENSG00000144668/ENSG00000196569/ENSG00000157445/ENSG00000142408/ENSG00000165995/ENSG00000100678/ENSG00000091409/ENSG00000161638/ENSG00000237298/ENSG00000007402/ENSG00000142875/ENSG00000151067/ENSG00000163069	25	ENSG00000075461/ENSG00000132470/ENSG00000102683/ENSG00000074370/ENSG00000115221/ENSG00000005884/ENSG00000173175/ENSG00000092969/ENSG00000167535/ENSG00000160789/ENSG00000140416/ENSG00000087460/ENSG00000119699/ENSG00000082781/ENSG00000213763/ENSG00000075624/ENSG00000139626/ENSG00000162104/ENSG00000174233/ENSG00000108878/ENSG00000157388/ENSG00000234996/ENSG00000173402/ENSG00000241015/ENSG00000167460
hsa04926	Relaxin signaling pathway	53|2593	137|9762	0.00120471	0.0133349	ENSG00000134871/ENSG00000146592/ENSG00000168542/ENSG00000197565/ENSG00000114450/ENSG00000127955/ENSG00000187498/ENSG00000087258/ENSG00000078401/ENSG00000185386/ENSG00000173175/ENSG00000170345/ENSG00000100906/ENSG00000007171/ENSG00000188153/ENSG00000127920/ENSG00000186469/ENSG00000145675/ENSG00000143578/ENSG00000136160/ENSG00000087245/novel.641/ENSG00000111664/ENSG00000069966/ENSG00000117020/ENSG0…	COL4A2/CREB5/COL3A1/COL4A6/GNB4/GNAI1/COL4A1/GNAO1/EDN1/MAPK11/ADCY5/FOS/NFKBIA/NOS2/COL4A5/GNG11/GNG2/PIK3R1/CREB3L4/EDNRB/MMP2/-/GNB3/GNB5/AKT3/AKT1/MMP9/GNB2/GNAS/GNG4/-/GNAI2/GNG7/MMP13/PLCB4/VEGFD/VEGFA/ADCY9/ADCY6/ARRB1/EGFR/GRB2/SHC1/SLC12A5-AS1/HRAS/GNG12/AKT2/PRKACB/PRKCA/AP000619.1/MAPK3/JUN/VEGFC	hsa:1284/hsa:9586/hsa:1281/hsa:1288/hsa:59345/hsa:2770/hsa:1282/hsa:2775/hsa:1906/hsa:5600/hsa:111/hsa:2353/hsa:4792/hsa:4843/hsa:1287/hsa:2791/hsa:54331/hsa:5295/hsa:148327/hsa:1910/hsa:4313/hsa:1388/hsa:2784/hsa:10681/hsa:10000/hsa:207/hsa:4318/hsa:2783/hsa:2778/hsa:2786/hsa:10000/hsa:2771/hsa:2788/hsa:4322/hsa:5332/hsa:2277/hsa:7422/hsa:115/hsa:112/hsa:408/hsa:1956/hsa:2885/hsa:6464/hsa:4318/h…	53	25	ENSG00000134871/ENSG00000146592/ENSG00000197565/ENSG00000114450/ENSG00000127955/ENSG00000187498/ENSG00000087258/ENSG00000007171/ENSG00000188153/ENSG00000127920/ENSG00000186469/ENSG00000136160/ENSG00000087245/ENSG00000111664/ENSG00000117020/ENSG00000168243/novel.503/ENSG00000176533/ENSG00000165197/ENSG00000146648/ENSG00000172380/ENSG00000142875/ENSG00000154229/ENSG00000225678/ENSG00000177606	28	ENSG00000168542/ENSG00000078401/ENSG00000185386/ENSG00000173175/ENSG00000170345/ENSG00000100906/ENSG00000145675/ENSG00000143578/novel.641/ENSG00000069966/ENSG00000142208/ENSG00000100985/ENSG00000172354/ENSG00000087460/ENSG00000114353/ENSG00000137745/ENSG00000101333/ENSG00000112715/ENSG00000162104/ENSG00000174233/ENSG00000137486/ENSG00000177885/ENSG00000160691/ENSG00000204044/ENSG00000174775/ENSG0…
hsa01522	Endocrine resistance	41|2593	101|9762	0.00143189	0.0153213	ENSG00000091831/ENSG00000147889/ENSG00000124151/ENSG00000100290/ENSG00000124762/ENSG00000185386/ENSG00000173175/ENSG00000170345/ENSG00000110092/ENSG00000090932/ENSG00000164850/ENSG00000145675/ENSG00000108443/ENSG00000087245/ENSG00000117020/ENSG00000074181/ENSG00000142208/ENSG00000100985/ENSG00000087460/ENSG00000111276/ENSG00000101384/novel.503/ENSG00000184916/ENSG00000140443/ENSG00000148400/ENSG0…	ESR1/CDKN2A/NCOA3/BIK/CDKN1A/MAPK11/ADCY5/FOS/CCND1/DLL3/GPER1/PIK3R1/RPS6KB1/MMP2/AKT3/NOTCH3/AKT1/MMP9/GNAS/CDKN1B/JAG1/-/JAG2/IGF1R/NOTCH1/ADCY9/ADCY6/CDKN2C/EGFR/DLL4/GRB2/SHC1/SLC12A5-AS1/HRAS/AKT2/PRKACB/ARAF/MED1/MAPK3/ERBB2/JUN	hsa:2099/hsa:1029/hsa:8202/hsa:638/hsa:1026/hsa:5600/hsa:111/hsa:2353/hsa:595/hsa:10683/hsa:2852/hsa:5295/hsa:6198/hsa:4313/hsa:10000/hsa:4854/hsa:207/hsa:4318/hsa:2778/hsa:1027/hsa:182/hsa:10000/hsa:3714/hsa:3480/hsa:4851/hsa:115/hsa:112/hsa:1031/hsa:1956/hsa:54567/hsa:2885/hsa:6464/hsa:4318/hsa:3845/hsa:208/hsa:5567/hsa:369/hsa:5469/hsa:5595/hsa:2064/hsa:3725	41	10	ENSG00000147889/ENSG00000090932/ENSG00000087245/ENSG00000117020/novel.503/ENSG00000123080/ENSG00000146648/ENSG00000142875/ENSG00000125686/ENSG00000177606	31	ENSG00000091831/ENSG00000124151/ENSG00000100290/ENSG00000124762/ENSG00000185386/ENSG00000173175/ENSG00000170345/ENSG00000110092/ENSG00000164850/ENSG00000145675/ENSG00000108443/ENSG00000074181/ENSG00000142208/ENSG00000100985/ENSG00000087460/ENSG00000111276/ENSG00000101384/ENSG00000184916/ENSG00000140443/ENSG00000148400/ENSG00000162104/ENSG00000174233/ENSG00000128917/ENSG00000177885/ENSG00000160691…
hsa05165	Human papillomavirus infection	130|2593	390|9762	0.00148258	0.0153519	ENSG00000137801/ENSG00000188064/ENSG00000134871/ENSG00000164683/ENSG00000132470/ENSG00000146592/ENSG00000050555/ENSG00000187608/ENSG00000073350/ENSG00000118971/ENSG00000263528/ENSG00000130545/ENSG00000196878/ENSG00000124171/ENSG00000213949/ENSG00000157601/ENSG00000197565/ENSG00000091136/ENSG00000204525/ENSG00000114251/ENSG00000109062/ENSG00000135114/ENSG00000124762/ENSG00000234745/ENSG00000115221…	THBS1/WNT7B/COL4A2/HEY1/ITGB4/CREB5/LAMC3/ISG15/LLGL2/CCND2/IKBKE/CRB3/LAMB3/PARD6B/ITGA1/MX1/COL4A6/LAMB1/HLA-C/WNT5A/SLC9A3R1/OASL/CDKN1A/HLA-B/ITGB6/LAMA1/COL4A1/LFNG/ITGA3/ITGA4/PARD6A/PTGER4/LAMA4/TCF7/CCND1/COL4A5/WNT4/PRSS23/-/PPP2R2C/PIK3R1/ITGA8/-/ATP6V0A4/CREB3L4/LAMA5/RPS6KB1/HES2/COL2A1/ITGA9/LAMA2/AKT3/NOTCH3/TNFRSF1A/AKT1/ATM/COMP/THBS4/HEYL/PXN/GNAS/-/FN1/CDKN1B/TICAM1/JAG1/ITGB5/-…	hsa:7057/hsa:7477/hsa:1284/hsa:23462/hsa:3691/hsa:9586/hsa:10319/hsa:9636/hsa:3993/hsa:894/hsa:9641/hsa:92359/hsa:3914/hsa:84612/hsa:3672/hsa:4599/hsa:1288/hsa:3912/hsa:3107/hsa:7474/hsa:9368/hsa:8638/hsa:1026/hsa:3106/hsa:3694/hsa:284217/hsa:1282/hsa:3955/hsa:3675/hsa:3676/hsa:50855/hsa:5734/hsa:3910/hsa:6932/hsa:595/hsa:1287/hsa:54361/hsa:8322/hsa:3106/hsa:5522/hsa:5295/hsa:8516/hsa:3107/hsa:50…	130	51	ENSG00000134871/ENSG00000164683/ENSG00000146592/ENSG00000050555/ENSG00000118971/ENSG00000213949/ENSG00000197565/ENSG00000091136/ENSG00000204525/ENSG00000114251/ENSG00000234745/ENSG00000101680/ENSG00000187498/ENSG00000115232/ENSG00000112769/ENSG00000081059/ENSG00000188153/ENSG00000077943/ENSG00000139219/ENSG00000144668/ENSG00000196569/ENSG00000117020/ENSG00000149311/ENSG00000105664/ENSG00000113296…	79	ENSG00000137801/ENSG00000188064/ENSG00000132470/ENSG00000187608/ENSG00000073350/ENSG00000263528/ENSG00000130545/ENSG00000196878/ENSG00000124171/ENSG00000157601/ENSG00000109062/ENSG00000135114/ENSG00000124762/ENSG00000115221/ENSG00000106003/ENSG00000005884/ENSG00000102981/ENSG00000171522/ENSG00000110092/ENSG00000162552/ENSG00000150687/novel.665/ENSG00000074211/ENSG00000145675/novel.685/ENSG0000010…
hsa05203	Viral carcinogenesis	100|2593	291|9762	0.00172462	0.0169893	ENSG00000006747/ENSG00000184678/ENSG00000147889/ENSG00000146592/ENSG00000273802/ENSG00000158373/ENSG00000118971/ENSG00000111321/ENSG00000158406/ENSG00000204525/ENSG00000124762/ENSG00000234745/ENSG00000180596/ENSG00000179388/ENSG00000100906/ENSG00000125730/ENSG00000124635/ENSG00000067066/ENSG00000141682/ENSG00000110092/novel.276/ENSG00000275713/ENSG00000197903/novel.665/ENSG00000203814/ENSG0000014…	SCIN/HIST2H2BE/CDKN2A/CREB5/HIST1H2BG/HIST1H2BD/CCND2/LTBR/HIST1H4H/HLA-C/CDKN1A/HLA-B/HIST1H2BC/EGR3/NFKBIA/C3/HIST1H2BJ/SP100/PMAIP1/CCND1/-/HIST1H2BH/HIST1H2BK/-/HIST2H2BF/GSN/PIK3R1/-/HIST4H4/CREB3L4/GTF2H2/-/HIST1H2BF/STAT5A/SKP2/-/GTF2H2B/HPN/-/MAPKAPK2/PXN/-/NFKB2/-/HDAC9/CDKN1B/HIST1H4K/-/HIST2H4B/-/TRADD/-/ATP6V0D1/AC011815.1/HIST2H2BD/HDAC2/IKBKGP1/HIST1H2BN/CDKN2B/ACTN1/-/-/HIST1H2BL/H…	hsa:85477/hsa:8349/hsa:1029/hsa:9586/hsa:8343/hsa:3017/hsa:894/hsa:4055/hsa:8370/hsa:3107/hsa:1026/hsa:3106/hsa:8343/hsa:1960/hsa:4792/hsa:718/hsa:8970/hsa:6672/hsa:5366/hsa:595/hsa:81/hsa:8345/hsa:85236/hsa:3106/hsa:440689/hsa:2934/hsa:5295/hsa:3107/hsa:8370/hsa:148327/hsa:2966/hsa:2968/hsa:8343/hsa:6776/hsa:6502/hsa:1388/hsa:2966/hsa:3249/hsa:2968/hsa:9261/hsa:5829/hsa:3665/hsa:4791/hsa:3133/hs…	100	33	ENSG00000147889/ENSG00000146592/ENSG00000118971/ENSG00000204525/ENSG00000234745/ENSG00000141682/ENSG00000145736/novel.626/ENSG00000145604/ENSG00000226259/novel.625/ENSG00000048052/novel.594/ENSG00000268573/ENSG00000196591/ENSG00000070501/novel.556/ENSG00000116478/ENSG00000234492/novel.572/ENSG00000142875/ENSG00000284693/ENSG00000111358/ENSG00000254087/ENSG00000280061/ENSG00000149554/ENSG000001379…	67	ENSG00000006747/ENSG00000184678/ENSG00000273802/ENSG00000158373/ENSG00000111321/ENSG00000158406/ENSG00000124762/ENSG00000180596/ENSG00000179388/ENSG00000100906/ENSG00000125730/ENSG00000124635/ENSG00000067066/ENSG00000110092/novel.276/ENSG00000275713/ENSG00000197903/novel.665/ENSG00000203814/ENSG00000148180/ENSG00000145675/novel.685/ENSG00000197837/ENSG00000143578/ENSG00000277224/ENSG00000126561/n…
hsa05031	Amphetamine addiction	31|2593	72|9762	0.00174657	0.0169893	ENSG00000146592/ENSG00000176884/ENSG00000184845/ENSG00000152495/ENSG00000173175/ENSG00000170345/ENSG00000166501/ENSG00000178372/ENSG00000198576/ENSG00000143578/ENSG00000180176/novel.641/ENSG00000058404/ENSG00000138814/ENSG00000087460/ENSG00000106089/ENSG00000172531/ENSG00000196591/ENSG00000169885/ENSG00000198785/ENSG00000116478/ENSG00000157388/ENSG00000142875/ENSG00000151067/ENSG00000152578/ENSG0…	CREB5/GRIN1/DRD1/CAMK4/ADCY5/FOS/PRKCB/CALML5/ARC/CREB3L4/TH/-/CAMK2B/PPP3CA/GNAS/STX1A/PPP1CA/HDAC2/CALML6/GRIN3A/HDAC1/CACNA1D/PRKACB/CACNA1C/GRIA4/AL391988.1/PRKCA/PPP1CC/SIRT1/JUN/CALM1	hsa:9586/hsa:2902/hsa:1812/hsa:814/hsa:111/hsa:2353/hsa:5579/hsa:51806/hsa:23237/hsa:148327/hsa:7054/hsa:1388/hsa:816/hsa:5530/hsa:2778/hsa:6804/hsa:5499/hsa:3066/hsa:163688/hsa:116443/hsa:3065/hsa:776/hsa:5567/hsa:775/hsa:2893/hsa:6571/hsa:5578/hsa:5501/hsa:23411/hsa:3725/hsa:808	31	14	ENSG00000146592/ENSG00000152495/ENSG00000166501/ENSG00000196591/ENSG00000198785/ENSG00000116478/ENSG00000142875/ENSG00000151067/ENSG00000152578/ENSG00000277879/ENSG00000154229/ENSG00000186298/ENSG00000096717/ENSG00000177606	17	ENSG00000176884/ENSG00000184845/ENSG00000173175/ENSG00000170345/ENSG00000178372/ENSG00000198576/ENSG00000143578/ENSG00000180176/novel.641/ENSG00000058404/ENSG00000138814/ENSG00000087460/ENSG00000106089/ENSG00000172531/ENSG00000169885/ENSG00000157388/ENSG00000198668
hsa04911	Insulin secretion	35|2593	84|9762	0.00182553	0.0172351	ENSG00000146592/ENSG00000173175/ENSG00000130529/ENSG00000166501/ENSG00000104783/ENSG00000078549/ENSG00000139515/ENSG00000143578/novel.641/ENSG00000129244/ENSG00000117394/ENSG00000143153/ENSG00000058404/ENSG00000096433/ENSG00000091428/ENSG00000080709/ENSG00000105642/ENSG00000203865/ENSG00000186472/ENSG00000087460/ENSG00000176406/ENSG00000214077/ENSG00000106089/ENSG00000132639/ENSG00000006071/ENSG0…	CREB5/ADCY5/TRPM4/PRKCB/KCNN4/ADCYAP1R1/PDX1/CREB3L4/-/ATP1B2/SLC2A1/ATP1B1/CAMK2B/ITPR3/RAPGEF4/KCNN2/KCNN1/ATP1A1-AS1/PCLO/GNAS/RIMS2/GNAQP1/STX1A/SNAP25/ABCC8/PLCB4/KCNN3/ADCY9/ADCY6/KCNJ11/CACNA1D/PRKACB/CACNA1C/RAB3A/PRKCA	hsa:9586/hsa:111/hsa:54795/hsa:5579/hsa:3783/hsa:117/hsa:3651/hsa:148327/hsa:1388/hsa:482/hsa:6513/hsa:481/hsa:816/hsa:3710/hsa:11069/hsa:3781/hsa:3780/hsa:476/hsa:27445/hsa:2778/hsa:9699/hsa:2776/hsa:6804/hsa:6616/hsa:6833/hsa:5332/hsa:3782/hsa:115/hsa:112/hsa:3767/hsa:776/hsa:5567/hsa:775/hsa:5864/hsa:5578	35	14	ENSG00000146592/ENSG00000166501/ENSG00000078549/ENSG00000139515/ENSG00000129244/ENSG00000091428/ENSG00000105642/ENSG00000186472/ENSG00000176406/ENSG00000006071/ENSG00000143603/ENSG00000142875/ENSG00000151067/ENSG00000154229	21	ENSG00000173175/ENSG00000130529/ENSG00000104783/ENSG00000143578/novel.641/ENSG00000117394/ENSG00000143153/ENSG00000058404/ENSG00000096433/ENSG00000080709/ENSG00000203865/ENSG00000087460/ENSG00000214077/ENSG00000106089/ENSG00000132639/ENSG00000101333/ENSG00000162104/ENSG00000174233/ENSG00000187486/ENSG00000157388/ENSG00000105649
hsa04923	Regulation of lipolysis in adipocytes	26|2593	58|9762	0.0020079	0.0184153	ENSG00000133124/ENSG00000127955/ENSG00000050628/ENSG00000074416/ENSG00000164128/ENSG00000169047/ENSG00000173175/ENSG00000095303/ENSG00000145675/ENSG00000079435/ENSG00000117020/ENSG00000185532/ENSG00000176485/ENSG00000142208/ENSG00000087460/ENSG00000138669/novel.503/ENSG00000114353/ENSG00000073756/ENSG00000122585/ENSG00000165409/ENSG00000162104/ENSG00000174233/ENSG00000105221/ENSG00000142875/ENSG0…	IRS4/GNAI1/PTGER3/MGLL/NPY1R/IRS1/ADCY5/PTGS1/PIK3R1/LIPE/AKT3/PRKG1/PLA2G16/AKT1/GNAS/PRKG2/-/GNAI2/PTGS2/NPY/TSHR/ADCY9/ADCY6/AKT2/PRKACB/CGA	hsa:8471/hsa:2770/hsa:5733/hsa:11343/hsa:4886/hsa:3667/hsa:111/hsa:5742/hsa:5295/hsa:3991/hsa:10000/hsa:5592/hsa:11145/hsa:207/hsa:2778/hsa:5593/hsa:10000/hsa:2771/hsa:5743/hsa:4852/hsa:7253/hsa:115/hsa:112/hsa:208/hsa:5567/hsa:1081	26	11	ENSG00000133124/ENSG00000127955/ENSG00000079435/ENSG00000117020/ENSG00000185532/ENSG00000138669/novel.503/ENSG00000073756/ENSG00000122585/ENSG00000165409/ENSG00000142875	15	ENSG00000050628/ENSG00000074416/ENSG00000164128/ENSG00000169047/ENSG00000173175/ENSG00000095303/ENSG00000145675/ENSG00000176485/ENSG00000142208/ENSG00000087460/ENSG00000114353/ENSG00000162104/ENSG00000174233/ENSG00000105221/ENSG00000135346
hsa04728	Dopaminergic synapse	53|2593	140|9762	0.00211363	0.0187139	ENSG00000146592/ENSG00000155980/ENSG00000114450/ENSG00000127955/ENSG00000141404/ENSG00000162989/ENSG00000087258/ENSG00000184845/ENSG00000185386/ENSG00000173175/ENSG00000148408/ENSG00000170345/ENSG00000166501/ENSG00000178372/ENSG00000127920/ENSG00000074211/ENSG00000186469/ENSG00000143578/ENSG00000180176/novel.641/ENSG00000111664/ENSG00000069966/ENSG00000117020/ENSG00000058404/ENSG00000096433/ENSG0…	CREB5/KIF5A/GNB4/GNAI1/GNAL/KCNJ3/GNAO1/DRD1/MAPK11/ADCY5/CACNA1B/FOS/PRKCB/CALML5/GNG11/PPP2R2C/GNG2/CREB3L4/TH/-/GNB3/GNB5/AKT3/CAMK2B/ITPR3/AKT1/PPP3CA/GNB2/GNAS/GNG4/COMT/-/GNAQP1/GNAI2/PPP1CA/GNG7/PLCB4/CALML6/ITPR1/ARRB1/CACNA1D/GNG12/AKT2/PPP2R3B/PRKACB/CACNA1C/GRIA4/AL391988.1/PRKCA/PPP2R1B/PPP1CC/KCNJ6/CALM1	hsa:9586/hsa:3798/hsa:59345/hsa:2770/hsa:2774/hsa:3760/hsa:2775/hsa:1812/hsa:5600/hsa:111/hsa:774/hsa:2353/hsa:5579/hsa:51806/hsa:2791/hsa:5522/hsa:54331/hsa:148327/hsa:7054/hsa:1388/hsa:2784/hsa:10681/hsa:10000/hsa:816/hsa:3710/hsa:207/hsa:5530/hsa:2783/hsa:2778/hsa:2786/hsa:1312/hsa:10000/hsa:2776/hsa:2771/hsa:5499/hsa:2788/hsa:5332/hsa:163688/hsa:3708/hsa:408/hsa:776/hsa:55970/hsa:208/hsa:2822…	53	24	ENSG00000146592/ENSG00000155980/ENSG00000114450/ENSG00000127955/ENSG00000141404/ENSG00000087258/ENSG00000148408/ENSG00000166501/ENSG00000127920/ENSG00000186469/ENSG00000111664/ENSG00000117020/ENSG00000168243/novel.503/ENSG00000176533/ENSG00000172380/ENSG00000142875/ENSG00000151067/ENSG00000152578/ENSG00000277879/ENSG00000154229/ENSG00000137713/ENSG00000186298/ENSG00000157542	29	ENSG00000162989/ENSG00000184845/ENSG00000185386/ENSG00000173175/ENSG00000170345/ENSG00000178372/ENSG00000074211/ENSG00000143578/ENSG00000180176/novel.641/ENSG00000069966/ENSG00000058404/ENSG00000096433/ENSG00000142208/ENSG00000138814/ENSG00000172354/ENSG00000087460/ENSG00000093010/ENSG00000214077/ENSG00000114353/ENSG00000172531/ENSG00000101333/ENSG00000169885/ENSG00000150995/ENSG00000137486/ENSG0…
hsa05170	Human immunodeficiency virus 1 infection	91|2593	263|9762	0.00215706	0.0187139	ENSG00000129354/ENSG00000172936/ENSG00000244509/ENSG00000204525/ENSG00000114450/ENSG00000127955/ENSG00000234745/ENSG00000101096/ENSG00000087258/ENSG00000185386/ENSG00000130303/ENSG00000170345/ENSG00000100906/ENSG00000166501/ENSG00000178372/ENSG00000108984/ENSG00000127920/novel.665/ENSG00000186469/ENSG00000164430/ENSG00000145675/novel.685/ENSG00000108443/novel.643/ENSG00000106367/ENSG00000132256/E…	AP1M2/MYD88/APOBEC3C/HLA-C/GNB4/GNAI1/HLA-B/NFATC2/GNAO1/MAPK11/BST2/FOS/NFKBIA/PRKCB/CALML5/MAP2K6/GNG11/-/GNG2/CGAS/PIK3R1/-/RPS6KB1/-/AP1S1/TRIM5/GNB3/APOBEC3B/CXCR4/APOBEC3F/GNB5/AKT3/ITPR3/BID/PAK1/TNFRSF1A/AKT1/PPP3CA/ATM/PXN/GNB2/PAK3/-/CCNB3/TMEM173/GNG4/TLR2/AP1S2/PAK4/-/GNAQP1/-/-/CUL4B/-/CALR4P/-/TRADD/GNAI2/-/TAP2/BCL2L1/AC025048.6/CFL2/GNG7/IKBKGP1/CALML6/-/ITPR1/-/AP1B1/-/AC112184.1…	hsa:10053/hsa:4615/hsa:27350/hsa:3107/hsa:59345/hsa:2770/hsa:3106/hsa:4773/hsa:2775/hsa:5600/hsa:684/hsa:2353/hsa:4792/hsa:5579/hsa:51806/hsa:5608/hsa:2791/hsa:3106/hsa:54331/hsa:115004/hsa:5295/hsa:3107/hsa:6198/hsa:6891/hsa:1174/hsa:85363/hsa:2784/hsa:9582/hsa:7852/hsa:200316/hsa:10681/hsa:10000/hsa:3710/hsa:637/hsa:5058/hsa:7132/hsa:207/hsa:5530/hsa:472/hsa:5829/hsa:2783/hsa:5063/hsa:3133/hsa:…	91	35	ENSG00000244509/ENSG00000204525/ENSG00000114450/ENSG00000127955/ENSG00000234745/ENSG00000087258/ENSG00000166501/ENSG00000108984/ENSG00000127920/ENSG00000186469/ENSG00000111664/ENSG00000128394/ENSG00000117020/ENSG00000149269/ENSG00000149311/ENSG00000077264/novel.625/ENSG00000147082/ENSG00000168243/ENSG00000182287/novel.503/novel.594/ENSG00000158290/ENSG00000204267/ENSG00000280852/ENSG00000165410/E…	56	ENSG00000129354/ENSG00000172936/ENSG00000101096/ENSG00000185386/ENSG00000130303/ENSG00000170345/ENSG00000100906/ENSG00000178372/novel.665/ENSG00000164430/ENSG00000145675/novel.685/ENSG00000108443/novel.643/ENSG00000106367/ENSG00000132256/ENSG00000179750/ENSG00000121966/ENSG00000069966/ENSG00000096433/ENSG00000015475/ENSG00000067182/ENSG00000142208/ENSG00000138814/ENSG00000089159/ENSG00000172354/E…
hsa05410	Hypertrophic cardiomyopathy (HCM)	44|2593	113|9762	0.00260256	0.0219847	ENSG00000075461/ENSG00000132470/ENSG00000162409/ENSG00000102683/ENSG00000074370/ENSG00000213949/ENSG00000115221/ENSG00000101680/ENSG00000005884/ENSG00000078401/ENSG00000115232/ENSG00000182389/ENSG00000153956/ENSG00000092969/ENSG00000183023/ENSG00000167535/ENSG00000198947/ENSG00000160789/ENSG00000077943/ENSG00000155657/ENSG00000144668/ENSG00000196569/ENSG00000157445/ENSG00000142408/ENSG00000140416…	CACNG4/ITGB4/PRKAA2/SGCG/ATP2A3/ITGA1/ITGB6/LAMA1/ITGA3/EDN1/ITGA4/CACNB4/CACNA2D1/TGFB2/SLC8A1/CACNB3/DMD/LMNA/ITGA8/TTN/ITGA9/LAMA2/CACNA2D3/CACNG8/TPM1/TGFB3/CACNB2/ITGB5/SLC8A3/ACTBP2/ACTB/ITGA6/ITGB7/ITGA5/CACNG1/CACNA1D/TTN-AS1/AC098934.2/CACNA2D2/DAG1/TPM3P9/CACNA1C/TPM4/SGCB	hsa:27092/hsa:3691/hsa:5563/hsa:6445/hsa:489/hsa:3672/hsa:3694/hsa:284217/hsa:3675/hsa:1906/hsa:3676/hsa:785/hsa:781/hsa:7042/hsa:6546/hsa:784/hsa:1756/hsa:4000/hsa:8516/hsa:7273/hsa:3680/hsa:3908/hsa:55799/hsa:59283/hsa:7168/hsa:7043/hsa:783/hsa:3693/hsa:6547/hsa:60/hsa:60/hsa:3655/hsa:3695/hsa:3678/hsa:786/hsa:776/hsa:7273/hsa:71/hsa:9254/hsa:1605/hsa:7171/hsa:775/hsa:7171/hsa:6443	44	22	ENSG00000162409/ENSG00000213949/ENSG00000101680/ENSG00000115232/ENSG00000182389/ENSG00000153956/ENSG00000183023/ENSG00000198947/ENSG00000077943/ENSG00000155657/ENSG00000144668/ENSG00000196569/ENSG00000157445/ENSG00000142408/ENSG00000165995/ENSG00000100678/ENSG00000091409/ENSG00000161638/ENSG00000237298/ENSG00000007402/ENSG00000151067/ENSG00000163069	22	ENSG00000075461/ENSG00000132470/ENSG00000102683/ENSG00000074370/ENSG00000115221/ENSG00000005884/ENSG00000078401/ENSG00000092969/ENSG00000167535/ENSG00000160789/ENSG00000140416/ENSG00000119699/ENSG00000082781/ENSG00000213763/ENSG00000075624/ENSG00000139626/ENSG00000108878/ENSG00000157388/ENSG00000234996/ENSG00000173402/ENSG00000241015/ENSG00000167460
hsa04961	Endocrine and other factor-regulated calcium reabsorption	27|2593	62|9762	0.00277118	0.0228089	ENSG00000091831/ENSG00000168398/ENSG00000183023/ENSG00000166501/ENSG00000129244/ENSG00000259660/ENSG00000197959/ENSG00000143153/ENSG00000203865/ENSG00000111424/ENSG00000087460/ENSG00000214077/ENSG00000183020/ENSG00000100678/ENSG00000106976/ENSG00000101333/ENSG00000161203/ENSG00000162104/ENSG00000042753/ENSG00000174233/ENSG00000058668/ENSG00000175416/ENSG00000142875/ENSG00000141367/ENSG00000154229…	ESR1/BDKRB2/SLC8A1/PRKCB/ATP1B2/DNM1P47/DNM3/ATP1B1/ATP1A1-AS1/VDR/GNAS/GNAQP1/AP2A2/SLC8A3/DNM1/PLCB4/AP2M1/ADCY9/AP2S1/ADCY6/ATP2B4/CLTB/PRKACB/CLTC/PRKCA/PTRH2/CLTCL1	hsa:2099/hsa:624/hsa:6546/hsa:5579/hsa:482/hsa:1759/hsa:26052/hsa:481/hsa:476/hsa:7421/hsa:2778/hsa:2776/hsa:161/hsa:6547/hsa:1759/hsa:5332/hsa:1173/hsa:115/hsa:1175/hsa:112/hsa:493/hsa:1212/hsa:5567/hsa:1213/hsa:5578/hsa:1213/hsa:8218	27	12	ENSG00000183023/ENSG00000166501/ENSG00000129244/ENSG00000259660/ENSG00000197959/ENSG00000183020/ENSG00000100678/ENSG00000106976/ENSG00000058668/ENSG00000142875/ENSG00000154229/ENSG00000070371	15	ENSG00000091831/ENSG00000168398/ENSG00000143153/ENSG00000203865/ENSG00000111424/ENSG00000087460/ENSG00000214077/ENSG00000101333/ENSG00000161203/ENSG00000162104/ENSG00000042753/ENSG00000174233/ENSG00000175416/ENSG00000141367/ENSG00000141378
hsa00480	Glutathione metabolism	29|2593	69|9762	0.00372581	0.0298996	ENSG00000233276/ENSG00000084207/ENSG00000170899/ENSG00000160211/novel.537/ENSG00000164294/ENSG00000178814/ENSG00000168765/ENSG00000278041/ENSG00000213366/ENSG00000167741/ENSG00000182054/ENSG00000134184/ENSG00000128965/ENSG00000197582/ENSG00000134202/ENSG00000241720/ENSG00000115758/ENSG00000234115/ENSG00000166825/ENSG00000143942/ENSG00000176153/ENSG00000023909/ENSG00000142657/ENSG00000131067/ENSG0…	GPX1/GSTP1/GSTA4/G6PD/-/GPX8/OPLAH/GSTM4/AL133325.3/GSTM2/GGT6/IDH2/GSTM1/CHAC1/GPX1P1/GSTM3/AL158847.1/ODC1/AL138878.2/ANPEP/CHAC2/GPX2/GCLM/PGD/GGT7/RRM1/GPX3/GPX4/MGST2	hsa:2876/hsa:2950/hsa:2941/hsa:2539/hsa:2952/hsa:493869/hsa:26873/hsa:2946/hsa:2947/hsa:2946/hsa:124975/hsa:3418/hsa:2944/hsa:79094/hsa:2876/hsa:2947/hsa:2947/hsa:4953/hsa:3417/hsa:290/hsa:494143/hsa:2877/hsa:2730/hsa:5226/hsa:2686/hsa:6240/hsa:2878/hsa:2879/hsa:4258	29	13	ENSG00000233276/ENSG00000084207/ENSG00000170899/ENSG00000164294/ENSG00000278041/ENSG00000213366/ENSG00000197582/ENSG00000115758/ENSG00000143942/ENSG00000023909/ENSG00000131067/ENSG00000167325/ENSG00000085871	16	ENSG00000160211/novel.537/ENSG00000178814/ENSG00000168765/ENSG00000167741/ENSG00000182054/ENSG00000134184/ENSG00000128965/ENSG00000134202/ENSG00000241720/ENSG00000234115/ENSG00000166825/ENSG00000176153/ENSG00000142657/ENSG00000211445/ENSG00000167468
hsa05226	Gastric cancer	58|2593	160|9762	0.00419576	0.0327743	ENSG00000039068/ENSG00000188064/ENSG00000076242/ENSG00000164690/ENSG00000114251/ENSG00000124762/ENSG00000173801/ENSG00000165556/ENSG00000077092/ENSG00000138795/ENSG00000092969/ENSG00000138685/ENSG00000081059/ENSG00000099860/ENSG00000110092/ENSG00000130222/ENSG00000162552/ENSG00000186350/ENSG00000150687/ENSG00000085563/ENSG00000145675/ENSG00000108443/ENSG00000138675/ENSG00000117020/ENSG00000142208…	CDH1/WNT7B/MLH1/SHH/WNT5A/CDKN1A/JUP/CDX2/RARB/LEF1/TGFB2/FGF2/TCF7/GADD45B/CCND1/GADD45G/WNT4/RXRA/PRSS23/ABCB1/PIK3R1/RPS6KB1/FGF5/AKT3/AKT1/FGF17/TGFB3/CDKN1B/-/SMAD3/FGF22/RXRG/LRP5/CTNNA3/CDKN2B/FRAT1/WNT9A/CTNNA1/POLK/FGF9/FGF18/EGFR/EGF/WNT10B/GRB2/FZD10/DDB2/-/SHC1/HRAS/AKT2/ARAF/WNT3A/MAPK3/DVL3/FZD3/FZD5/ERBB2	hsa:999/hsa:7477/hsa:4292/hsa:6469/hsa:7474/hsa:1026/hsa:3728/hsa:1045/hsa:5915/hsa:51176/hsa:7042/hsa:2247/hsa:6932/hsa:4616/hsa:595/hsa:10912/hsa:54361/hsa:6256/hsa:8322/hsa:5243/hsa:5295/hsa:6198/hsa:2250/hsa:10000/hsa:207/hsa:8822/hsa:7043/hsa:1027/hsa:10000/hsa:4088/hsa:27006/hsa:6258/hsa:4041/hsa:29119/hsa:1030/hsa:10023/hsa:7483/hsa:1495/hsa:51426/hsa:2254/hsa:8817/hsa:1956/hsa:1950/hsa:74…	58	20	ENSG00000114251/ENSG00000165556/ENSG00000077092/ENSG00000138795/ENSG00000138685/ENSG00000081059/ENSG00000085563/ENSG00000138675/ENSG00000117020/ENSG00000158815/novel.503/ENSG00000143171/ENSG00000122008/ENSG00000102678/ENSG00000146648/ENSG00000169884/ENSG00000111432/novel.453/ENSG00000154342/ENSG00000104290	38	ENSG00000039068/ENSG00000188064/ENSG00000076242/ENSG00000164690/ENSG00000124762/ENSG00000173801/ENSG00000092969/ENSG00000099860/ENSG00000110092/ENSG00000130222/ENSG00000162552/ENSG00000186350/ENSG00000150687/ENSG00000145675/ENSG00000108443/ENSG00000142208/ENSG00000119699/ENSG00000111276/ENSG00000166949/ENSG00000070388/ENSG00000162337/ENSG00000183230/ENSG00000147883/ENSG00000165879/ENSG00000143816…
hsa00410	beta-Alanine metabolism	17|2593	35|9762	0.00428823	0.0327743	ENSG00000132746/ENSG00000111275/ENSG00000183044/ENSG00000006534/ENSG00000131471/ENSG00000184254/ENSG00000131480/ENSG00000103150/ENSG00000188641/ENSG00000127884/ENSG00000133313/ENSG00000136750/ENSG00000113790/ENSG00000087008/ENSG00000161533/ENSG00000108602/ENSG00000143149	ALDH3B2/ALDH2/ABAT/ALDH3B1/AOC3/ALDH1A3/AOC2/MLYCD/DPYD/ECHS1/CNDP2/GAD2/EHHADH/ACOX3/ACOX1/ALDH3A1/ALDH9A1	hsa:222/hsa:217/hsa:18/hsa:221/hsa:8639/hsa:220/hsa:314/hsa:23417/hsa:1806/hsa:1892/hsa:55748/hsa:2572/hsa:1962/hsa:8310/hsa:51/hsa:218/hsa:223	17	7	ENSG00000111275/ENSG00000131471/ENSG00000131480/ENSG00000136750/ENSG00000113790/ENSG00000108602/ENSG00000143149	10	ENSG00000132746/ENSG00000183044/ENSG00000006534/ENSG00000184254/ENSG00000103150/ENSG00000188641/ENSG00000127884/ENSG00000133313/ENSG00000087008/ENSG00000161533
hsa04218	Cellular senescence	75|2593	216|9762	0.0045606	0.0331713	ENSG00000146674/ENSG00000147889/ENSG00000118971/ENSG00000204525/ENSG00000162909/ENSG00000124762/ENSG00000234745/ENSG00000101096/ENSG00000185386/ENSG00000092969/ENSG00000178372/ENSG00000099860/ENSG00000110092/novel.304/ENSG00000108984/ENSG00000130222/novel.665/ENSG00000145675/ENSG00000163349/novel.685/ENSG00000152518/ENSG00000134954/ENSG00000117020/ENSG00000096433/ENSG00000158186/ENSG00000185650/E…	IGFBP3/CDKN2A/CCND2/HLA-C/CAPN2/CDKN1A/HLA-B/NFATC2/MAPK11/TGFB2/CALML5/GADD45B/CCND1/-/MAP2K6/GADD45G/-/PIK3R1/HIPK1/-/ZFP36L2/ETS1/AKT3/ITPR3/MRAS/ZFP36L1/AKT1/PPP3CA/ATM/RRAS/CDC25A/LIN9/CAPN1/CXCL8/MAPKAPK2/-/TGFB3/CCNB3/TRAF3IP2/-/SMAD3/-/SLC25A5P5/-/SLC25A6/-/-/RBBP4/PPP1CA/FOXO1/CDKN2B/PTENP1/CALML6/-/ITPR1/-/MRE11/FOXO1B/-/TRPV4/SQSTM1/SLC25A5P1/CACNA1D/LIN52/RBBP4P1/HRAS/MYBL2/AKT2/CHEK1…	hsa:3486/hsa:1029/hsa:894/hsa:3107/hsa:824/hsa:1026/hsa:3106/hsa:4773/hsa:5600/hsa:7042/hsa:51806/hsa:4616/hsa:595/hsa:2626/hsa:5608/hsa:10912/hsa:3106/hsa:5295/hsa:204851/hsa:3107/hsa:678/hsa:2113/hsa:10000/hsa:3710/hsa:22808/hsa:677/hsa:207/hsa:5530/hsa:472/hsa:6237/hsa:993/hsa:286826/hsa:823/hsa:3576/hsa:9261/hsa:3133/hsa:7043/hsa:85417/hsa:10758/hsa:10000/hsa:4088/hsa:3107/hsa:292/hsa:8878/hs…	75	28	ENSG00000147889/ENSG00000118971/ENSG00000204525/ENSG00000162909/ENSG00000234745/novel.304/ENSG00000108984/ENSG00000134954/ENSG00000117020/ENSG00000158186/ENSG00000149311/ENSG00000164045/ENSG00000183814/novel.625/ENSG00000147082/novel.503/novel.594/ENSG00000162521/ENSG00000150907/ENSG00000237984/ENSG00000020922/ENSG00000214295/ENSG00000205659/ENSG00000249485/ENSG00000149554/ENSG00000186298/ENSG000…	47	ENSG00000146674/ENSG00000124762/ENSG00000101096/ENSG00000185386/ENSG00000092969/ENSG00000178372/ENSG00000099860/ENSG00000110092/ENSG00000130222/novel.665/ENSG00000145675/ENSG00000163349/novel.685/ENSG00000152518/ENSG00000096433/ENSG00000185650/ENSG00000142208/ENSG00000138814/ENSG00000126458/ENSG00000014216/ENSG00000169429/ENSG00000162889/ENSG00000119699/ENSG00000056972/ENSG00000166949/ENSG0000022…
hsa04662	B cell receptor signaling pathway	33|2593	82|9762	0.00468249	0.0331713	ENSG00000111679/ENSG00000101096/ENSG00000170345/ENSG00000100906/ENSG00000166501/ENSG00000012124/ENSG00000145675/ENSG00000177455/ENSG00000117020/ENSG00000142208/ENSG00000138814/ENSG00000185201/ENSG00000095585/ENSG00000185885/ENSG00000160293/novel.503/ENSG00000275882/novel.277/ENSG00000070190/ENSG00000117322/ENSG00000269335/ENSG00000155629/ENSG00000177885/ENSG00000174775/ENSG00000134215/ENSG0000010…	PTPN6/NFATC2/FOS/NFKBIA/PRKCB/CD22/PIK3R1/CD19/AKT3/AKT1/PPP3CA/IFITM2/BLNK/IFITM1/VAV2/-/IKBKGP1/-/DAPP1/CR2/IKBKG/PIK3AP1/GRB2/HRAS/VAV3/AKT2/NFKBIE/LYN/ZNF518A/MAPK3/VAV1/JUN/MALT1	hsa:5777/hsa:4773/hsa:2353/hsa:4792/hsa:5579/hsa:933/hsa:5295/hsa:930/hsa:10000/hsa:207/hsa:5530/hsa:8519/hsa:29760/hsa:8519/hsa:7410/hsa:10000/hsa:8517/hsa:4793/hsa:27071/hsa:1380/hsa:8517/hsa:118788/hsa:2885/hsa:3845/hsa:10451/hsa:208/hsa:4794/hsa:4067/hsa:29760/hsa:5595/hsa:7409/hsa:3725/hsa:10892	33	10	ENSG00000166501/ENSG00000177455/ENSG00000117020/novel.503/ENSG00000117322/ENSG00000155629/ENSG00000254087/ENSG00000177853/ENSG00000177606/ENSG00000172175	23	ENSG00000111679/ENSG00000101096/ENSG00000170345/ENSG00000100906/ENSG00000012124/ENSG00000145675/ENSG00000142208/ENSG00000138814/ENSG00000185201/ENSG00000095585/ENSG00000185885/ENSG00000160293/ENSG00000275882/novel.277/ENSG00000070190/ENSG00000269335/ENSG00000177885/ENSG00000174775/ENSG00000134215/ENSG00000105221/ENSG00000146232/ENSG00000102882/ENSG00000141968
hsa04924	Renin secretion	31|2593	76|9762	0.00475352	0.0331713	ENSG00000127955/ENSG00000078401/ENSG00000173175/ENSG00000171522/ENSG00000178372/ENSG00000078549/ENSG00000061918/ENSG00000152402/ENSG00000127129/ENSG00000096433/ENSG00000164116/ENSG00000138814/ENSG00000087460/ENSG00000138669/ENSG00000144891/ENSG00000214077/ENSG00000114353/ENSG00000240583/novel.295/ENSG00000101333/ENSG00000169885/ENSG00000150995/ENSG00000174233/ENSG00000157388/ENSG00000142875/ENSG0…	GNAI1/EDN1/ADCY5/PTGER4/CALML5/ADCYAP1R1/GUCY1B1/GUCY1A2/EDN2/ITPR3/GUCY1A1/PPP3CA/GNAS/PRKG2/AGTR1/GNAQP1/GNAI2/AQP1/-/PLCB4/CALML6/ITPR1/ADCY6/CACNA1D/PRKACB/CACNA1C/EDNRA/PDE1B/CTSB/REN/CALM1	hsa:2770/hsa:1906/hsa:111/hsa:5734/hsa:51806/hsa:117/hsa:2983/hsa:2977/hsa:1907/hsa:3710/hsa:2982/hsa:5530/hsa:2778/hsa:5593/hsa:185/hsa:2776/hsa:2771/hsa:358/hsa:1508/hsa:5332/hsa:163688/hsa:3708/hsa:112/hsa:776/hsa:5567/hsa:775/hsa:1909/hsa:5153/hsa:1508/hsa:5972/hsa:808	31	12	ENSG00000127955/ENSG00000078549/ENSG00000061918/ENSG00000152402/ENSG00000164116/ENSG00000138669/ENSG00000144891/ENSG00000240583/ENSG00000142875/ENSG00000151067/ENSG00000151617/ENSG00000123360	19	ENSG00000078401/ENSG00000173175/ENSG00000171522/ENSG00000178372/ENSG00000127129/ENSG00000096433/ENSG00000138814/ENSG00000087460/ENSG00000214077/ENSG00000114353/novel.295/ENSG00000101333/ENSG00000169885/ENSG00000150995/ENSG00000174233/ENSG00000157388/ENSG00000164733/ENSG00000143839/ENSG00000198668
hsa05204	Chemical carcinogenesis	31|2593	76|9762	0.00475352	0.0331713	ENSG00000132746/ENSG00000084207/ENSG00000138061/ENSG00000170899/ENSG00000151632/ENSG00000006534/novel.537/ENSG00000168765/ENSG00000278041/ENSG00000213366/ENSG00000167165/ENSG00000134184/ENSG00000140465/ENSG00000241635/ENSG00000184254/ENSG00000130649/ENSG00000134202/ENSG00000241720/ENSG00000196502/ENSG00000137944/ENSG00000073756/ENSG00000255974/ENSG00000175344/ENSG00000197165/ENSG00000138109/ENSG0…	ALDH3B2/GSTP1/CYP1B1/GSTA4/AKR1C2/ALDH3B1/-/GSTM4/AL133325.3/GSTM2/UGT1A6/GSTM1/CYP1A1/UGT1A1/ALDH1A3/CYP2E1/GSTM3/AL158847.1/SULT1A1/KYAT3/PTGS2/CYP2A6/CHRNA7/SULT1A2/CYP2C9/UGT2B4/KYAT1/-/ALDH3A1/SULT2A1/MGST2	hsa:222/hsa:2950/hsa:1545/hsa:2941/hsa:1646/hsa:221/hsa:2952/hsa:2946/hsa:2947/hsa:2946/hsa:54578/hsa:2944/hsa:1543/hsa:54658/hsa:220/hsa:1571/hsa:2947/hsa:2947/hsa:6817/hsa:56267/hsa:5743/hsa:1548/hsa:1139/hsa:6799/hsa:1559/hsa:7363/hsa:883/hsa:1139/hsa:218/hsa:6822/hsa:4258	31	15	ENSG00000084207/ENSG00000170899/ENSG00000278041/ENSG00000213366/ENSG00000130649/ENSG00000137944/ENSG00000073756/ENSG00000175344/ENSG00000138109/ENSG00000156096/ENSG00000171097/novel.387/ENSG00000108602/ENSG00000105398/ENSG00000085871	16	ENSG00000132746/ENSG00000138061/ENSG00000151632/ENSG00000006534/novel.537/ENSG00000168765/ENSG00000167165/ENSG00000134184/ENSG00000140465/ENSG00000241635/ENSG00000184254/ENSG00000134202/ENSG00000241720/ENSG00000196502/ENSG00000255974/ENSG00000197165
hsa04960	Aldosterone-regulated sodium reabsorption	19|2593	41|9762	0.00499853	0.0334235	ENSG00000111319/ENSG00000175793/ENSG00000169047/ENSG00000166501/ENSG00000065054/ENSG00000145675/ENSG00000129244/ENSG00000143153/ENSG00000168447/ENSG00000166828/ENSG00000203865/ENSG00000151623/ENSG00000205918/ENSG00000176387/ENSG00000049759/ENSG00000174775/ENSG00000151704/ENSG00000154229/ENSG00000102882	SCNN1A/SFN/IRS1/PRKCB/SLC9A3R2/PIK3R1/ATP1B2/ATP1B1/SCNN1B/SCNN1G/ATP1A1-AS1/NR3C2/PDPK2P/HSD11B2/NEDD4L/HRAS/KCNJ1/PRKCA/MAPK3	hsa:6337/hsa:2810/hsa:3667/hsa:5579/hsa:9351/hsa:5295/hsa:482/hsa:481/hsa:6338/hsa:6340/hsa:476/hsa:4306/hsa:5170/hsa:3291/hsa:23327/hsa:3845/hsa:3758/hsa:5578/hsa:5595	19	5	ENSG00000166501/ENSG00000129244/ENSG00000151623/ENSG00000151704/ENSG00000154229	14	ENSG00000111319/ENSG00000175793/ENSG00000169047/ENSG00000065054/ENSG00000145675/ENSG00000143153/ENSG00000168447/ENSG00000166828/ENSG00000203865/ENSG00000205918/ENSG00000176387/ENSG00000049759/ENSG00000174775/ENSG00000102882
hsa00052	Galactose metabolism	15|2593	30|9762	0.00508756	0.0334235	ENSG00000085662/ENSG00000079739/ENSG00000086062/ENSG00000142856/ENSG00000067057/ENSG00000141959/ENSG00000214013/ENSG00000117308/ENSG00000156515/ENSG00000143891/ENSG00000108479/ENSG00000171298/ENSG00000198074/ENSG00000102393/ENSG00000170266	AKR1B1/PGM1/B4GALT1/ITGB3BP/PFKP/PFKL/GANC/GALE/HK1/GALM/GALK1/GAA/AKR1B10/GLA/GLB1	hsa:231/hsa:5236/hsa:2683/hsa:5236/hsa:5214/hsa:5211/hsa:2595/hsa:2582/hsa:3098/hsa:130589/hsa:2584/hsa:2548/hsa:57016/hsa:2717/hsa:2720	15	6	ENSG00000085662/ENSG00000079739/ENSG00000142856/ENSG00000214013/ENSG00000143891/ENSG00000102393	9	ENSG00000086062/ENSG00000067057/ENSG00000141959/ENSG00000117308/ENSG00000156515/ENSG00000108479/ENSG00000171298/ENSG00000198074/ENSG00000170266
hsa04750	Inflammatory mediator regulation of TRP channels	40|2593	104|9762	0.00510202	0.0334235	ENSG00000175591/ENSG00000115594/ENSG00000168398/ENSG00000185386/ENSG00000173175/ENSG00000171522/ENSG00000166501/ENSG00000168907/ENSG00000178372/ENSG00000108984/ENSG00000065675/ENSG00000116711/ENSG00000145675/ENSG00000058404/ENSG00000096433/ENSG00000163932/ENSG00000196689/ENSG00000087460/ENSG00000104321/ENSG00000214077/ENSG00000147246/ENSG00000250979/ENSG00000172531/ENSG00000027075/ENSG00000101333…	P2RY2/IL1R1/BDKRB2/MAPK11/ADCY5/PTGER4/PRKCB/PLA2G4F/CALML5/MAP2K6/PRKCQ/PLA2G4A/PIK3R1/CAMK2B/ITPR3/PRKCD/TRPV1/GNAS/TRPA1/GNAQP1/HTR2C/AC022905.1/PPP1CA/PRKCH/PLCB4/CALML6/ITPR1/PLCG1/TRPV4/ADCY9/ADCY6/PLA2G4C/IL1RAP/NTRK1/PRKACB/PRKCA/PPP1CC/BDKRB1/TRPV3/CALM1	hsa:5029/hsa:3554/hsa:624/hsa:5600/hsa:111/hsa:5734/hsa:5579/hsa:255189/hsa:51806/hsa:5608/hsa:5588/hsa:5321/hsa:5295/hsa:816/hsa:3710/hsa:5580/hsa:7442/hsa:2778/hsa:8989/hsa:2776/hsa:3358/hsa:8989/hsa:5499/hsa:5583/hsa:5332/hsa:163688/hsa:3708/hsa:5335/hsa:59341/hsa:115/hsa:112/hsa:8605/hsa:3556/hsa:4914/hsa:5567/hsa:5578/hsa:5501/hsa:623/hsa:162514/hsa:808	40	13	ENSG00000166501/ENSG00000108984/ENSG00000065675/ENSG00000116711/ENSG00000196689/ENSG00000104321/ENSG00000147246/ENSG00000250979/ENSG00000196083/ENSG00000198400/ENSG00000142875/ENSG00000154229/ENSG00000186298	27	ENSG00000175591/ENSG00000115594/ENSG00000168398/ENSG00000185386/ENSG00000173175/ENSG00000171522/ENSG00000168907/ENSG00000178372/ENSG00000145675/ENSG00000058404/ENSG00000096433/ENSG00000163932/ENSG00000087460/ENSG00000214077/ENSG00000172531/ENSG00000027075/ENSG00000101333/ENSG00000169885/ENSG00000150995/ENSG00000124181/ENSG00000111199/ENSG00000162104/ENSG00000174233/ENSG00000105499/ENSG00000100739…
hsa05142	Chagas disease (American trypanosomiasis)	38|2593	98|9762	0.00533232	0.0342335	ENSG00000172936/ENSG00000127955/ENSG00000141404/ENSG00000168398/ENSG00000087258/ENSG00000185386/ENSG00000156049/ENSG00000170345/ENSG00000092969/ENSG00000100906/ENSG00000125730/ENSG00000007171/ENSG00000074211/ENSG00000145675/ENSG00000117020/ENSG00000067182/ENSG00000142208/ENSG00000169429/ENSG00000174130/ENSG00000108691/ENSG00000087460/ENSG00000119699/ENSG00000137462/ENSG00000127666/novel.503/ENSG0…	MYD88/GNAI1/GNAL/BDKRB2/GNAO1/MAPK11/GNA14/FOS/TGFB2/NFKBIA/C3/NOS2/PPP2R2C/PIK3R1/AKT3/TNFRSF1A/AKT1/CXCL8/TLR6/CCL2/GNAS/TGFB3/TLR2/TICAM1/-/GNAQP1/IL12A/CALR4P/GNAI2/PLCB4/IKBKGP1/IKBKG/AKT2/-/PPP2R1B/MAPK3/SERPINE1/JUN	hsa:4615/hsa:2770/hsa:2774/hsa:624/hsa:2775/hsa:5600/hsa:9630/hsa:2353/hsa:7042/hsa:4792/hsa:718/hsa:4843/hsa:5522/hsa:5295/hsa:10000/hsa:7132/hsa:207/hsa:3576/hsa:10333/hsa:6347/hsa:2778/hsa:7043/hsa:7097/hsa:148022/hsa:10000/hsa:2776/hsa:3592/hsa:811/hsa:2771/hsa:5332/hsa:8517/hsa:8517/hsa:208/hsa:6352/hsa:5519/hsa:5595/hsa:5054/hsa:3725	38	10	ENSG00000127955/ENSG00000141404/ENSG00000087258/ENSG00000007171/ENSG00000117020/ENSG00000174130/novel.503/ENSG00000168811/ENSG00000137713/ENSG00000177606	28	ENSG00000172936/ENSG00000168398/ENSG00000185386/ENSG00000156049/ENSG00000170345/ENSG00000092969/ENSG00000100906/ENSG00000125730/ENSG00000074211/ENSG00000145675/ENSG00000067182/ENSG00000142208/ENSG00000169429/ENSG00000108691/ENSG00000087460/ENSG00000119699/ENSG00000137462/ENSG00000127666/ENSG00000214077/ENSG00000227742/ENSG00000114353/ENSG00000101333/ENSG00000275882/ENSG00000269335/ENSG00000105221…
hsa04721	Synaptic vesicle cycle	35|2593	89|9762	0.00564874	0.0351674	ENSG00000079215/ENSG00000110436/ENSG00000148408/ENSG00000132164/ENSG00000108576/ENSG00000105929/ENSG00000196517/ENSG00000259660/ENSG00000197959/ENSG00000106688/ENSG00000010379/ENSG00000111450/ENSG00000183020/ENSG00000106089/ENSG00000132639/ENSG00000110719/ENSG00000159720/ENSG00000106976/ENSG00000099365/ENSG00000113732/ENSG00000157103/ENSG00000161203/ENSG00000042753/ENSG00000260075/ENSG00000168993…	SLC1A3/SLC1A2/CACNA1B/SLC6A11/SLC6A4/ATP6V0A4/SLC6A9/DNM1P47/DNM3/SLC1A1/SLC6A13/STX2/AP2A2/STX1A/SNAP25/TCIRG1/ATP6V0D1/DNM1/STX1B/ATP6V0E1/SLC6A1/AP2M1/AP2S1/NSFP1/CPLX1/RIMS1/CLTB/RAB3A/CLTC/AP002807.1/AL391988.1/PTRH2/CLTCL1/-/NAPA	hsa:6507/hsa:6506/hsa:774/hsa:6538/hsa:6532/hsa:50617/hsa:6536/hsa:1759/hsa:26052/hsa:6505/hsa:6540/hsa:2054/hsa:161/hsa:6804/hsa:6616/hsa:10312/hsa:9114/hsa:1759/hsa:112755/hsa:8992/hsa:6529/hsa:1173/hsa:1175/hsa:4905/hsa:10815/hsa:22999/hsa:1212/hsa:5864/hsa:1213/hsa:10312/hsa:6571/hsa:1213/hsa:8218/hsa:4905/hsa:8775	35	16	ENSG00000079215/ENSG00000148408/ENSG00000132164/ENSG00000108576/ENSG00000259660/ENSG00000197959/ENSG00000106688/ENSG00000010379/ENSG00000111450/ENSG00000183020/ENSG00000106976/ENSG00000157103/ENSG00000260075/ENSG00000079841/ENSG00000277879/ENSG00000070371	19	ENSG00000110436/ENSG00000105929/ENSG00000196517/ENSG00000106089/ENSG00000132639/ENSG00000110719/ENSG00000159720/ENSG00000099365/ENSG00000113732/ENSG00000161203/ENSG00000042753/ENSG00000168993/ENSG00000175416/ENSG00000105649/ENSG00000141367/ENSG00000255031/ENSG00000141378/novel.436/ENSG00000105402
hsa05218	Melanoma	32|2593	80|9762	0.00590474	0.0351674	ENSG00000039068/ENSG00000100311/ENSG00000147889/ENSG00000124762/ENSG00000138685/ENSG00000099860/ENSG00000110092/ENSG00000130222/ENSG00000145675/ENSG00000197461/ENSG00000138675/ENSG00000117020/ENSG00000142208/ENSG00000158815/novel.503/ENSG00000140443/ENSG00000070388/ENSG00000134853/ENSG00000237984/ENSG00000145431/ENSG00000122008/ENSG00000102678/ENSG00000156427/ENSG00000146648/ENSG00000138798/ENSG0…	CDH1/PDGFB/CDKN2A/CDKN1A/FGF2/GADD45B/CCND1/GADD45G/PIK3R1/PDGFA/FGF5/AKT3/AKT1/FGF17/-/IGF1R/FGF22/PDGFRA/PTENP1/PDGFC/POLK/FGF9/FGF18/EGFR/EGF/PDGFRB/DDB2/HRAS/AKT2/ARAF/MITF/MAPK3	hsa:999/hsa:5155/hsa:1029/hsa:1026/hsa:2247/hsa:4616/hsa:595/hsa:10912/hsa:5295/hsa:5154/hsa:2250/hsa:10000/hsa:207/hsa:8822/hsa:10000/hsa:3480/hsa:27006/hsa:5156/hsa:5728/hsa:56034/hsa:51426/hsa:2254/hsa:8817/hsa:1956/hsa:1950/hsa:5159/hsa:1643/hsa:3845/hsa:208/hsa:369/hsa:4286/hsa:5595	32	14	ENSG00000147889/ENSG00000138685/ENSG00000138675/ENSG00000117020/ENSG00000158815/novel.503/ENSG00000134853/ENSG00000237984/ENSG00000145431/ENSG00000122008/ENSG00000102678/ENSG00000146648/ENSG00000113721/ENSG00000187098	18	ENSG00000039068/ENSG00000100311/ENSG00000124762/ENSG00000099860/ENSG00000110092/ENSG00000130222/ENSG00000145675/ENSG00000197461/ENSG00000142208/ENSG00000140443/ENSG00000070388/ENSG00000156427/ENSG00000138798/ENSG00000134574/ENSG00000174775/ENSG00000105221/ENSG00000078061/ENSG00000102882
hsa04730	Long-term depression	25|2593	59|9762	0.00601427	0.0351674	ENSG00000127955/ENSG00000087258/ENSG00000166501/ENSG00000168907/ENSG00000061918/ENSG00000116711/ENSG00000152402/ENSG00000096433/ENSG00000185532/ENSG00000164116/ENSG00000087460/ENSG00000138669/ENSG00000214077/ENSG00000140443/ENSG00000114353/ENSG00000152208/ENSG00000101333/ENSG00000150995/ENSG00000105499/ENSG00000174775/ENSG00000078061/ENSG00000254087/ENSG00000154229/ENSG00000137713/ENSG00000102882	GNAI1/GNAO1/PRKCB/PLA2G4F/GUCY1B1/PLA2G4A/GUCY1A2/ITPR3/PRKG1/GUCY1A1/GNAS/PRKG2/GNAQP1/IGF1R/GNAI2/GRID2/PLCB4/ITPR1/PLA2G4C/HRAS/ARAF/LYN/PRKCA/PPP2R1B/MAPK3	hsa:2770/hsa:2775/hsa:5579/hsa:255189/hsa:2983/hsa:5321/hsa:2977/hsa:3710/hsa:5592/hsa:2982/hsa:2778/hsa:5593/hsa:2776/hsa:3480/hsa:2771/hsa:2895/hsa:5332/hsa:3708/hsa:8605/hsa:3845/hsa:369/hsa:4067/hsa:5578/hsa:5519/hsa:5595	25	13	ENSG00000127955/ENSG00000087258/ENSG00000166501/ENSG00000061918/ENSG00000116711/ENSG00000152402/ENSG00000185532/ENSG00000164116/ENSG00000138669/ENSG00000152208/ENSG00000254087/ENSG00000154229/ENSG00000137713	12	ENSG00000168907/ENSG00000096433/ENSG00000087460/ENSG00000214077/ENSG00000140443/ENSG00000114353/ENSG00000101333/ENSG00000150995/ENSG00000105499/ENSG00000174775/ENSG00000078061/ENSG00000102882
hsa04929	GnRH secretion	30|2593	74|9762	0.00602282	0.0351674	ENSG00000162989/ENSG00000196557/ENSG00000166501/ENSG00000104783/ENSG00000164850/ENSG00000145675/ENSG00000099822/ENSG00000117020/ENSG00000096433/ENSG00000142208/ENSG00000080709/ENSG00000105642/ENSG00000100346/ENSG00000170498/novel.503/ENSG00000214077/ENSG00000144935/ENSG00000101333/ENSG00000150995/ENSG00000143603/ENSG00000137486/ENSG00000187486/ENSG00000157388/ENSG00000174775/ENSG00000105221/ENSG0…	KCNJ3/CACNA1H/PRKCB/KCNN4/GPER1/PIK3R1/HCN2/AKT3/ITPR3/AKT1/KCNN2/KCNN1/CACNA1I/KISS1/-/GNAQP1/TRPC1/PLCB4/ITPR1/KCNN3/ARRB1/KCNJ11/CACNA1D/HRAS/AKT2/CACNA1C/PRKCA/MAPK3/KCNJ6/CGA	hsa:3760/hsa:8912/hsa:5579/hsa:3783/hsa:2852/hsa:5295/hsa:610/hsa:10000/hsa:3710/hsa:207/hsa:3781/hsa:3780/hsa:8911/hsa:3814/hsa:10000/hsa:2776/hsa:7220/hsa:5332/hsa:3708/hsa:3782/hsa:408/hsa:3767/hsa:776/hsa:3845/hsa:208/hsa:775/hsa:5578/hsa:5595/hsa:3763/hsa:1081	30	9	ENSG00000166501/ENSG00000117020/ENSG00000105642/novel.503/ENSG00000144935/ENSG00000143603/ENSG00000151067/ENSG00000154229/ENSG00000157542	21	ENSG00000162989/ENSG00000196557/ENSG00000104783/ENSG00000164850/ENSG00000145675/ENSG00000099822/ENSG00000096433/ENSG00000142208/ENSG00000080709/ENSG00000100346/ENSG00000170498/ENSG00000214077/ENSG00000101333/ENSG00000150995/ENSG00000137486/ENSG00000187486/ENSG00000157388/ENSG00000174775/ENSG00000105221/ENSG00000102882/ENSG00000135346
hsa04611	Platelet activation	52|2593	143|9762	0.00602557	0.0351674	ENSG00000118640/ENSG00000169860/ENSG00000168542/ENSG00000127955/ENSG00000181104/ENSG00000010810/ENSG00000185386/ENSG00000173175/ENSG00000095303/ENSG00000168907/ENSG00000101608/ENSG00000118680/ENSG00000061918/ENSG00000116711/ENSG00000145675/ENSG00000125753/ENSG00000152402/ENSG00000117020/ENSG00000096433/ENSG00000185532/ENSG00000164116/ENSG00000283709/ENSG00000142208/ENSG00000087460/ENSG00000138669…	VAMP8/P2RY1/COL3A1/GNAI1/F2R/FYN/MAPK11/ADCY5/PTGS1/PLA2G4F/MYL12A/MYL12B/GUCY1B1/PLA2G4A/PIK3R1/VASP/GUCY1A2/AKT3/ITPR3/PRKG1/GUCY1A1/FAM238C/AKT1/GNAS/PRKG2/-/GNAQP1/GNAI2/ACTBP2/PPP1CA/VWFP1/ARHGAP35/PLCB4/ACTB/ITPR1/RASGRP1/TBXAS1/ADCY9/ADCY6/PLA2G4C/TPTEP1/VWF/MYLK/AC098934.2/AKT2/PRKACB/LYN/GP1BA/ARHGEF1/RAP1AP/MAPK3/PPP1CC	hsa:8673/hsa:5028/hsa:1281/hsa:2770/hsa:2149/hsa:2534/hsa:5600/hsa:111/hsa:5742/hsa:255189/hsa:10627/hsa:103910/hsa:2983/hsa:5321/hsa:5295/hsa:7408/hsa:2977/hsa:10000/hsa:3710/hsa:5592/hsa:2982/hsa:54518/hsa:207/hsa:2778/hsa:5593/hsa:10000/hsa:2776/hsa:2771/hsa:60/hsa:5499/hsa:7450/hsa:2909/hsa:5332/hsa:60/hsa:3708/hsa:10125/hsa:6916/hsa:115/hsa:112/hsa:8605/hsa:7450/hsa:7450/hsa:4638/hsa:71/hsa:…	52	19	ENSG00000169860/ENSG00000127955/ENSG00000181104/ENSG00000010810/ENSG00000061918/ENSG00000116711/ENSG00000152402/ENSG00000117020/ENSG00000185532/ENSG00000164116/ENSG00000283709/ENSG00000138669/novel.503/ENSG00000059377/ENSG00000065534/ENSG00000142875/ENSG00000254087/ENSG00000185245/ENSG00000186298	33	ENSG00000118640/ENSG00000168542/ENSG00000185386/ENSG00000173175/ENSG00000095303/ENSG00000168907/ENSG00000101608/ENSG00000118680/ENSG00000145675/ENSG00000125753/ENSG00000096433/ENSG00000142208/ENSG00000087460/ENSG00000214077/ENSG00000114353/ENSG00000213763/ENSG00000172531/ENSG00000241717/ENSG00000160007/ENSG00000101333/ENSG00000075624/ENSG00000150995/ENSG00000172575/ENSG00000162104/ENSG00000174233…
hsa05222	Small cell lung cancer	46|2593	125|9762	0.00735719	0.0414603	ENSG00000134871/ENSG00000050555/ENSG00000196878/ENSG00000197565/ENSG00000091136/ENSG00000124762/ENSG00000101680/ENSG00000187498/ENSG00000077092/ENSG00000005884/ENSG00000100906/ENSG00000007171/ENSG00000112769/ENSG00000099860/ENSG00000110092/ENSG00000188153/ENSG00000130222/ENSG00000186350/ENSG00000145675/ENSG00000130702/ENSG00000145604/ENSG00000120868/ENSG00000196569/ENSG00000117020/ENSG00000142208…	COL4A2/LAMC3/LAMB3/COL4A6/LAMB1/CDKN1A/LAMA1/COL4A1/RARB/ITGA3/NFKBIA/NOS2/LAMA4/GADD45B/CCND1/COL4A5/GADD45G/RXRA/PIK3R1/LAMA5/SKP2/APAF1/LAMA2/AKT3/AKT1/TRAF4/FN1/CDKN1B/BIRC3/-/LAMC2/RXRG/LAMB2/BCL2L1/PTGS2/FHIT/IKBKGP1/CDKN2B/PTENP1/ITGA6/POLK/IKBKG/LAMA3/DDB2/AKT2/ZBTB17	hsa:1284/hsa:10319/hsa:3914/hsa:1288/hsa:3912/hsa:1026/hsa:284217/hsa:1282/hsa:5915/hsa:3675/hsa:4792/hsa:4843/hsa:3910/hsa:4616/hsa:595/hsa:1287/hsa:10912/hsa:6256/hsa:5295/hsa:3911/hsa:6502/hsa:317/hsa:3908/hsa:10000/hsa:207/hsa:9618/hsa:2335/hsa:1027/hsa:330/hsa:10000/hsa:3918/hsa:6258/hsa:3913/hsa:598/hsa:5743/hsa:2272/hsa:8517/hsa:1030/hsa:5728/hsa:3655/hsa:51426/hsa:8517/hsa:3909/hsa:1643/h…	46	22	ENSG00000134871/ENSG00000050555/ENSG00000197565/ENSG00000091136/ENSG00000101680/ENSG00000187498/ENSG00000077092/ENSG00000007171/ENSG00000112769/ENSG00000188153/ENSG00000145604/ENSG00000120868/ENSG00000196569/ENSG00000117020/novel.503/ENSG00000143171/ENSG00000073756/ENSG00000189283/ENSG00000237984/ENSG00000091409/ENSG00000122008/ENSG00000053747	24	ENSG00000196878/ENSG00000124762/ENSG00000005884/ENSG00000100906/ENSG00000099860/ENSG00000110092/ENSG00000130222/ENSG00000186350/ENSG00000145675/ENSG00000130702/ENSG00000142208/ENSG00000076604/ENSG00000115414/ENSG00000111276/ENSG00000023445/ENSG00000058085/ENSG00000172037/ENSG00000171552/ENSG00000275882/ENSG00000147883/ENSG00000269335/ENSG00000134574/ENSG00000105221/ENSG00000116809
hsa04670	Leukocyte transendothelial migration	55|2593	154|9762	0.0073621	0.0414603	ENSG00000165215/ENSG00000181885/ENSG00000166086/ENSG00000213937/ENSG00000163347/ENSG00000107562/ENSG00000090339/ENSG00000147065/ENSG00000127955/ENSG00000115232/ENSG00000185386/ENSG00000166501/novel.276/ENSG00000217801/ENSG00000101608/novel.422/ENSG00000051523/ENSG00000118680/ENSG00000145675/ENSG00000087245/ENSG00000125753/ENSG00000121966/ENSG00000273443/ENSG00000091428/ENSG00000169896/ENSG0000010…	CLDN3/CLDN7/JAM3/CLDN9/CLDN1/CXCL12/ICAM1/MSN/GNAI1/ITGA4/MAPK11/PRKCB/-/AL390719.1/MYL12A/-/CYBA/MYL12B/PIK3R1/MMP2/VASP/CXCR4/AL645608.9/RAPGEF4/ITGAM/MMP9/PXN/F11R/VAV2/JAM2/MSNP1/GNAI2/BCAR1/ACTBP2/CTNNA3/ARHGAP35/ACTB/ACTN1/CLDN18/RHOH/CTNNA1/PLCG1/AFDN/CLDN2/AC098934.2/SLC12A5-AS1/CLDN6/CLDN10/VAV3/VCL/PRKCA/RAP1AP/SIPA1/VAV1/CDH5	hsa:1365/hsa:1366/hsa:83700/hsa:9080/hsa:9076/hsa:6387/hsa:3383/hsa:4478/hsa:2770/hsa:3676/hsa:5600/hsa:5579/hsa:81/hsa:5781/hsa:10627/hsa:9564/hsa:1535/hsa:103910/hsa:5295/hsa:4313/hsa:7408/hsa:7852/hsa:5781/hsa:11069/hsa:3684/hsa:4318/hsa:5829/hsa:50848/hsa:7410/hsa:58494/hsa:4478/hsa:2771/hsa:9564/hsa:60/hsa:29119/hsa:2909/hsa:60/hsa:87/hsa:51208/hsa:399/hsa:1495/hsa:5335/hsa:4301/hsa:9075/hsa…	55	16	ENSG00000166086/ENSG00000147065/ENSG00000127955/ENSG00000115232/ENSG00000166501/ENSG00000087245/ENSG00000091428/ENSG00000154721/ENSG00000251593/ENSG00000066405/ENSG00000130396/ENSG00000165376/ENSG00000134873/ENSG00000035403/ENSG00000154229/ENSG00000213445	39	ENSG00000165215/ENSG00000181885/ENSG00000213937/ENSG00000163347/ENSG00000107562/ENSG00000090339/ENSG00000185386/novel.276/ENSG00000217801/ENSG00000101608/novel.422/ENSG00000051523/ENSG00000118680/ENSG00000145675/ENSG00000125753/ENSG00000121966/ENSG00000273443/ENSG00000169896/ENSG00000100985/ENSG00000089159/ENSG00000158769/ENSG00000160293/ENSG00000114353/ENSG00000050820/ENSG00000213763/ENSG0000018…
hsa04931	Insulin resistance	45|2593	122|9762	0.00759812	0.0420516	ENSG00000162409/ENSG00000146592/ENSG00000184557/ENSG00000119938/ENSG00000169047/ENSG00000100906/ENSG00000166501/ENSG00000072133/ENSG00000217801/ENSG00000100504/ENSG00000065675/ENSG00000072310/ENSG00000110090/ENSG00000145675/ENSG00000143578/ENSG00000108443/ENSG00000136111/ENSG00000113396/ENSG00000117394/ENSG00000143554/ENSG00000117020/ENSG00000273443/ENSG00000163932/ENSG00000067182/ENSG00000142208…	PRKAA2/CREB5/SOCS3/PPP1R3C/IRS1/NFKBIA/PRKCB/RPS6KA6/AL390719.1/PYGL/PRKCQ/SREBF1/CPT1A/PIK3R1/CREB3L4/RPS6KB1/TBC1D4/SLC27A6/SLC2A1/SLC27A3/AKT3/AL645608.9/PRKCD/TNFRSF1A/AKT1/TRIB3/NR1H2/PPARA/PPP1R3D/PDPK2P/-/PTPA/PPARGC1B/PPP1CA/FOXO1/PTENP1/RPS6KA3/FOXO1B/PTPRF/PTPN1/AKT2/PYGB/PPP1CC/AC012512.1/GYS2	hsa:5563/hsa:9586/hsa:9021/hsa:5507/hsa:3667/hsa:4792/hsa:5579/hsa:27330/hsa:5781/hsa:5836/hsa:5588/hsa:6720/hsa:1374/hsa:5295/hsa:148327/hsa:6198/hsa:9882/hsa:28965/hsa:6513/hsa:11000/hsa:10000/hsa:5781/hsa:5580/hsa:7132/hsa:207/hsa:57761/hsa:7376/hsa:5465/hsa:5509/hsa:5170/hsa:10000/hsa:5524/hsa:133522/hsa:5499/hsa:2308/hsa:5728/hsa:6197/hsa:2308/hsa:5792/hsa:5770/hsa:208/hsa:5834/hsa:5501/hsa:…	45	18	ENSG00000162409/ENSG00000146592/ENSG00000166501/ENSG00000072133/ENSG00000100504/ENSG00000065675/ENSG00000136111/ENSG00000113396/ENSG00000117020/ENSG00000186951/novel.503/ENSG00000155846/ENSG00000150907/ENSG00000237984/ENSG00000177189/ENSG00000214295/ENSG00000186298/ENSG00000111713	27	ENSG00000184557/ENSG00000119938/ENSG00000169047/ENSG00000100906/ENSG00000217801/ENSG00000072310/ENSG00000110090/ENSG00000145675/ENSG00000143578/ENSG00000108443/ENSG00000117394/ENSG00000143554/ENSG00000273443/ENSG00000163932/ENSG00000067182/ENSG00000142208/ENSG00000101255/ENSG00000131408/ENSG00000132825/ENSG00000205918/ENSG00000119383/ENSG00000172531/ENSG00000142949/ENSG00000196396/ENSG00000105221…
hsa04668	TNF signaling pathway	47|2593	129|9762	0.00837811	0.0451599	ENSG00000146592/ENSG00000069399/ENSG00000184557/ENSG00000171223/ENSG00000090339/ENSG00000168404/ENSG00000003400/ENSG00000078401/ENSG00000185386/ENSG00000170345/ENSG00000100906/ENSG00000108984/ENSG00000115604/ENSG00000145675/ENSG00000143578/novel.641/ENSG00000225684/ENSG00000107968/ENSG00000117020/ENSG00000067182/ENSG00000142208/ENSG00000172216/ENSG00000100985/ENSG00000267702/ENSG00000108691/ENSG0…	CREB5/BCL3/SOCS3/JUNB/ICAM1/MLKL/CASP10/EDN1/MAPK11/FOS/NFKBIA/MAP2K6/IL18R1/PIK3R1/CREB3L4/-/FAM225B/MAP3K8/AKT3/TNFRSF1A/AKT1/CEBPB/MMP9/AP005131.6/CCL2/BIRC3/JAG1/-/TRADD/PTGS2/IKBKGP1/IRF1/VEGFD/BAG4/LIF/RPS6KA4/MAP3K14/IKBKG/DAB2IP/SLC12A5-AS1/AKT2/MAP3K14-AS1/-/CEBPB-AS1/MAPK3/JUN/VEGFC	hsa:9586/hsa:602/hsa:9021/hsa:3726/hsa:3383/hsa:197259/hsa:843/hsa:1906/hsa:5600/hsa:2353/hsa:4792/hsa:5608/hsa:8809/hsa:5295/hsa:148327/hsa:1388/hsa:83737/hsa:1326/hsa:10000/hsa:7132/hsa:207/hsa:1051/hsa:4318/hsa:83737/hsa:6347/hsa:330/hsa:182/hsa:10000/hsa:8717/hsa:5743/hsa:8517/hsa:3659/hsa:2277/hsa:9530/hsa:3976/hsa:8986/hsa:9020/hsa:8517/hsa:153090/hsa:4318/hsa:208/hsa:9020/hsa:6352/hsa:1051…	47	10	ENSG00000146592/ENSG00000003400/ENSG00000108984/ENSG00000115604/ENSG00000117020/novel.503/ENSG00000073756/ENSG00000165197/ENSG00000156735/ENSG00000177606	37	ENSG00000069399/ENSG00000184557/ENSG00000171223/ENSG00000090339/ENSG00000168404/ENSG00000078401/ENSG00000185386/ENSG00000170345/ENSG00000100906/ENSG00000145675/ENSG00000143578/novel.641/ENSG00000225684/ENSG00000107968/ENSG00000067182/ENSG00000142208/ENSG00000172216/ENSG00000100985/ENSG00000267702/ENSG00000108691/ENSG00000023445/ENSG00000101384/ENSG00000102871/ENSG00000275882/ENSG00000125347/ENSG0…
hsa05214	Glioma	35|2593	91|9762	0.00844111	0.0451599	ENSG00000100311/ENSG00000147889/ENSG00000163235/ENSG00000124762/ENSG00000152495/ENSG00000166501/ENSG00000178372/ENSG00000099860/ENSG00000110092/ENSG00000130222/ENSG00000145675/ENSG00000197461/ENSG00000117020/ENSG00000058404/ENSG00000142208/novel.503/ENSG00000140443/ENSG00000134853/ENSG00000237984/ENSG00000169885/ENSG00000134072/ENSG00000122008/ENSG00000124181/ENSG00000146648/ENSG00000138798/ENSG0…	PDGFB/CDKN2A/TGFA/CDKN1A/CAMK4/PRKCB/CALML5/GADD45B/CCND1/GADD45G/PIK3R1/PDGFA/AKT3/CAMK2B/AKT1/-/IGF1R/PDGFRA/PTENP1/CALML6/CAMK1/POLK/PLCG1/EGFR/EGF/GRB2/PDGFRB/DDB2/SHC1/HRAS/AKT2/ARAF/PRKCA/MAPK3/CALM1	hsa:5155/hsa:1029/hsa:7039/hsa:1026/hsa:814/hsa:5579/hsa:51806/hsa:4616/hsa:595/hsa:10912/hsa:5295/hsa:5154/hsa:10000/hsa:816/hsa:207/hsa:10000/hsa:3480/hsa:5156/hsa:5728/hsa:163688/hsa:8536/hsa:51426/hsa:5335/hsa:1956/hsa:1950/hsa:2885/hsa:5159/hsa:1643/hsa:6464/hsa:3845/hsa:208/hsa:369/hsa:5578/hsa:5595/hsa:808	35	12	ENSG00000147889/ENSG00000152495/ENSG00000166501/ENSG00000117020/novel.503/ENSG00000134853/ENSG00000237984/ENSG00000134072/ENSG00000122008/ENSG00000146648/ENSG00000113721/ENSG00000154229	23	ENSG00000100311/ENSG00000163235/ENSG00000124762/ENSG00000178372/ENSG00000099860/ENSG00000110092/ENSG00000130222/ENSG00000145675/ENSG00000197461/ENSG00000058404/ENSG00000142208/ENSG00000140443/ENSG00000169885/ENSG00000124181/ENSG00000138798/ENSG00000177885/ENSG00000134574/ENSG00000160691/ENSG00000174775/ENSG00000105221/ENSG00000078061/ENSG00000102882/ENSG00000198668
hsa04976	Bile secretion	31|2593	79|9762	0.00918815	0.0483508	ENSG00000108846/ENSG00000173175/ENSG00000118777/ENSG00000125257/ENSG00000186350/ENSG00000167165/ENSG00000085563/ENSG00000090020/ENSG00000080493/ENSG00000129244/ENSG00000117394/ENSG00000143153/ENSG00000241635/ENSG00000084453/ENSG00000080709/ENSG00000104267/ENSG00000203865/ENSG00000130164/ENSG00000087460/ENSG00000164889/ENSG00000171885/ENSG00000240583/ENSG00000162104/ENSG00000174233/ENSG00000138075…	ABCC3/ADCY5/ABCG2/ABCC4/RXRA/UGT1A6/ABCB1/SLC9A1/SLC4A4/ATP1B2/SLC2A1/ATP1B1/UGT1A1/SLCO1A2/KCNN2/CA2/ATP1A1-AS1/LDLR/GNAS/SLC4A2/AQP4/AQP1/ADCY9/ADCY6/ABCG5/UGT2B4/SLC4A5/PRKACB/SCARB1/ABCG8/SULT2A1	hsa:8714/hsa:111/hsa:9429/hsa:10257/hsa:6256/hsa:54578/hsa:5243/hsa:6548/hsa:8671/hsa:482/hsa:6513/hsa:481/hsa:54658/hsa:6579/hsa:3781/hsa:760/hsa:476/hsa:3949/hsa:2778/hsa:6522/hsa:361/hsa:358/hsa:115/hsa:112/hsa:64240/hsa:7363/hsa:57835/hsa:5567/hsa:949/hsa:64241/hsa:6822	31	14	ENSG00000125257/ENSG00000085563/ENSG00000080493/ENSG00000129244/ENSG00000084453/ENSG00000104267/ENSG00000171885/ENSG00000240583/ENSG00000138075/ENSG00000156096/ENSG00000188687/ENSG00000142875/ENSG00000143921/ENSG00000105398	17	ENSG00000108846/ENSG00000173175/ENSG00000118777/ENSG00000186350/ENSG00000167165/ENSG00000090020/ENSG00000117394/ENSG00000143153/ENSG00000241635/ENSG00000080709/ENSG00000203865/ENSG00000130164/ENSG00000087460/ENSG00000164889/ENSG00000162104/ENSG00000174233/ENSG00000073060
hsa04920	Adipocytokine signaling pathway	30|2593	76|9762	0.00935152	0.0484167	ENSG00000133124/ENSG00000162409/ENSG00000184557/ENSG00000068366/ENSG00000116678/ENSG00000169047/ENSG00000100906/ENSG00000217801/ENSG00000065675/ENSG00000186350/ENSG00000110090/ENSG00000164398/ENSG00000117394/ENSG00000117020/ENSG00000273443/ENSG00000067182/ENSG00000142208/ENSG00000186951/novel.503/ENSG00000143171/ENSG00000102871/ENSG00000122585/ENSG00000275882/novel.277/ENSG00000269335/ENSG0000016…	IRS4/PRKAA2/SOCS3/ACSL4/LEPR/IRS1/NFKBIA/AL390719.1/PRKCQ/RXRA/CPT1A/ACSL6/SLC2A1/AKT3/AL645608.9/TNFRSF1A/AKT1/PPARA/-/RXRG/TRADD/NPY/IKBKGP1/-/IKBKG/CPT1C/AKT2/NFKBIE/POMC/ADIPOR2	hsa:8471/hsa:5563/hsa:9021/hsa:2182/hsa:3953/hsa:3667/hsa:4792/hsa:5781/hsa:5588/hsa:6256/hsa:1374/hsa:23305/hsa:6513/hsa:10000/hsa:5781/hsa:7132/hsa:207/hsa:5465/hsa:10000/hsa:6258/hsa:8717/hsa:4852/hsa:8517/hsa:4793/hsa:8517/hsa:126129/hsa:208/hsa:4794/hsa:5443/hsa:79602	30	13	ENSG00000133124/ENSG00000162409/ENSG00000068366/ENSG00000116678/ENSG00000065675/ENSG00000164398/ENSG00000117020/ENSG00000186951/novel.503/ENSG00000143171/ENSG00000122585/ENSG00000169169/ENSG00000115138	17	ENSG00000184557/ENSG00000169047/ENSG00000100906/ENSG00000217801/ENSG00000186350/ENSG00000110090/ENSG00000117394/ENSG00000273443/ENSG00000067182/ENSG00000142208/ENSG00000102871/ENSG00000275882/novel.277/ENSG00000269335/ENSG00000105221/ENSG00000146232/ENSG00000006831
hsa05217	Basal cell carcinoma	28|2593	70|9762	0.00963328	0.0490839	ENSG00000188064/ENSG00000164690/ENSG00000128602/ENSG00000074047/ENSG00000114251/ENSG00000124762/ENSG00000138795/ENSG00000081059/ENSG00000099860/ENSG00000185920/ENSG00000130222/ENSG00000162552/ENSG00000150687/ENSG00000117425/ENSG00000248890/ENSG00000143816/ENSG00000122008/ENSG00000111087/ENSG00000169884/ENSG00000111432/ENSG00000134574/novel.453/ENSG00000271155/ENSG00000166813/ENSG00000154342/ENSG0…	WNT7B/SHH/SMO/GLI2/WNT5A/CDKN1A/LEF1/TCF7/GADD45B/PTCH1/GADD45G/WNT4/PRSS23/PTCH2/HHIP-AS1/WNT9A/POLK/GLI1/WNT10B/FZD10/DDB2/-/AL161729.1/KIF7/WNT3A/DVL3/FZD3/FZD5	hsa:7477/hsa:6469/hsa:6608/hsa:2736/hsa:7474/hsa:1026/hsa:51176/hsa:6932/hsa:4616/hsa:5727/hsa:10912/hsa:54361/hsa:8322/hsa:8643/hsa:64399/hsa:7483/hsa:51426/hsa:2735/hsa:7480/hsa:11211/hsa:1643/hsa:7473/hsa:5727/hsa:374654/hsa:89780/hsa:1857/hsa:7976/hsa:7855	28	17	ENSG00000128602/ENSG00000074047/ENSG00000114251/ENSG00000138795/ENSG00000081059/ENSG00000185920/ENSG00000117425/ENSG00000248890/ENSG00000122008/ENSG00000111087/ENSG00000169884/ENSG00000111432/novel.453/ENSG00000271155/ENSG00000166813/ENSG00000154342/ENSG00000104290	11	ENSG00000188064/ENSG00000164690/ENSG00000124762/ENSG00000099860/ENSG00000130222/ENSG00000162552/ENSG00000150687/ENSG00000143816/ENSG00000134574/ENSG00000161202/ENSG00000163251
hsa05163	Human cytomegalovirus infection	88|2593	266|9762	0.0099323	0.0498167	ENSG00000147889/ENSG00000146592/ENSG00000107562/ENSG00000204525/ENSG00000114450/ENSG00000127955/ENSG00000124762/ENSG00000050628/ENSG00000115594/ENSG00000234745/ENSG00000101096/ENSG00000087258/ENSG00000185386/ENSG00000173175/ENSG00000171522/ENSG00000100906/ENSG00000166501/ENSG00000178372/ENSG00000110092/ENSG00000108984/novel.422/ENSG00000127920/novel.665/ENSG00000186469/ENSG00000164430/ENSG0000014…	CDKN2A/CREB5/CXCL12/HLA-C/GNB4/GNAI1/CDKN1A/PTGER3/IL1R1/HLA-B/NFATC2/GNAO1/MAPK11/ADCY5/PTGER4/NFKBIA/PRKCB/CALML5/CCND1/MAP2K6/-/GNG11/-/GNG2/CGAS/PIK3R1/-/CREB3L4/RPS6KB1/-/-/GNB3/CXCR4/GNB5/AKT3/ITPR3/BID/TNFRSF1A/AKT1/PPP3CA/CXCL8/PXN/CCL2/GNB2/GNAS/-/TMEM173/GNG4/-/GNAQP1/-/-/-/CALR4P/-/TRADD/GNAI2/-/BCAR1/TAP2/PDGFRA/PTGS2/GNG7/IL10RA/PLCB4/IKBKGP1/CALML6/-/ITPR1/-/-/VEGFA/ADCY9/ADCY6/EGFR…	hsa:1029/hsa:9586/hsa:6387/hsa:3107/hsa:59345/hsa:2770/hsa:1026/hsa:5733/hsa:3554/hsa:3106/hsa:4773/hsa:2775/hsa:5600/hsa:111/hsa:5734/hsa:4792/hsa:5579/hsa:51806/hsa:595/hsa:5608/hsa:9564/hsa:2791/hsa:3106/hsa:54331/hsa:115004/hsa:5295/hsa:3107/hsa:148327/hsa:6198/hsa:6891/hsa:1388/hsa:2784/hsa:7852/hsa:10681/hsa:10000/hsa:3710/hsa:637/hsa:7132/hsa:207/hsa:5530/hsa:3576/hsa:5829/hsa:6347/hsa:278…	88	26	ENSG00000147889/ENSG00000146592/ENSG00000204525/ENSG00000114450/ENSG00000127955/ENSG00000234745/ENSG00000087258/ENSG00000166501/ENSG00000108984/ENSG00000127920/ENSG00000186469/ENSG00000111664/ENSG00000117020/novel.625/ENSG00000168243/novel.503/novel.594/ENSG00000204267/ENSG00000134853/ENSG00000073756/ENSG00000176533/ENSG00000110324/ENSG00000146648/ENSG00000172380/ENSG00000142875/ENSG00000154229	62	ENSG00000107562/ENSG00000124762/ENSG00000050628/ENSG00000115594/ENSG00000101096/ENSG00000185386/ENSG00000173175/ENSG00000171522/ENSG00000100906/ENSG00000178372/ENSG00000110092/novel.422/novel.665/ENSG00000164430/ENSG00000145675/novel.685/ENSG00000143578/ENSG00000108443/novel.643/novel.641/ENSG00000121966/ENSG00000069966/ENSG00000096433/ENSG00000015475/ENSG00000067182/ENSG00000142208/ENSG000001388…
