# Supplementary material for: A single cysteine residue in vimentin regulates long non-coding RNA XIST to suppress epithelial–mesenchymal transition and stemness in breast cancer
Source: eLife. 2025 Jul 21;14:RP104191. doi: 10.7554/eLife.104191 (PMC12279371; doi:10.7554/eLife.104191)
Supplement: Figure 3—figure supplement 4—source data 1. [file elife-104191-fig3-figsupp4-data1.xlsx]

## Sheet: rearrangedC328SVIMvsWT_VIM_DEG_
Upregulated Genes deduced from RNA-seq Data.
gene_id	MCF7_C328S_1	MCF7_C328S_2	MCF7_VH1	MCF7_VH2	log2FoldChange	pvalue	padj	gene_name	gene_chr	gene_start	gene_end	gene_strand	gene_length	gene_biotype	gene_description	tf_family	MCF7_C328S_1_readcount	MCF7_C328S_2_readcount	MCF7_VH1_readcount	MCF7_VH2_readcount	MCF7_C328S_1_fpkm	MCF7_C328S_2_fpkm	MCF7_VH1_fpkm	MCF7_VH2_fpkm
ENSG00000229807	88877.9	83974.2	16.6989	31.3043	11.7965	8.28212e-98	1.95524e-93	XIST	X	73820651	73852753	-	19961	lincRNA	X inactive specific transcript (non-protein coding) [Source:HGNC Symbol;Acc:HGNC:12810]	-	116339	98317	12	30	164.229	154.443	0.0303915	0.0573902
ENSG00000159217	9367.63	9334.64	34.7895	27.1304	8.24503	9.9095e-54	1.29969e-50	IGF2BP1	17	48997412	49055650	+	9109	protein_coding	insulin like growth factor 2 mRNA binding protein 1 [Source:HGNC Symbol;Acc:HGNC:28866]	KH_1	12262	10929	25	26	37.9312	37.6212	0.138747	0.108994
ENSG00000102024	32475.8	32860.4	122.459	193.043	7.69136	8.41654e-51	7.64222e-48	PLS3	X	115561174	115650861	+	4099	protein_coding	plastin 3 [Source:HGNC Symbol;Acc:HGNC:9091]	CH	42510	38473	88	185	292.227	294.307	1.08532	1.72343
ENSG00000178695	7466.15	7486.33	50.0968	52.1739	7.19112	1.17963e-44	5.92528e-42	KCTD12	13	76880166	76886390	-	6225	protein_coding	potassium channel tetramerization domain containing 12 [Source:HGNC Symbol;Acc:HGNC:14678]	K_tetra	9773	8765	36	50	44.2379	44.1505	0.292359	0.306711
ENSG00000163430	3579.14	3536.9	13.9158	11.4783	8.13926	5.85132e-43	2.60638e-40	FSTL1	3	120392293	120451253	-	8727	protein_coding	follistatin like 1 [Source:HGNC Symbol;Acc:HGNC:3972]	-	4685	4141	10	11	15.1269	14.8786	0.057928	0.0481312
ENSG00000117519	5092.53	5125.55	1.39158	7.30435	10.1087	3.53255e-42	1.4631e-39	CNN3	1	94896949	94927278	-	2838	protein_coding	calponin 3 [Source:HGNC Symbol;Acc:HGNC:2157]	CH	6666	6001	1	7	66.185	66.3031	0.0178132	0.0941856
ENSG00000147231	4983.29	4826.61	12.5242	29.2174	7.85239	6.0542e-41	2.30528e-38	CXorf57	X	106611930	106679442	+	4853	protein_coding	chromosome X open reading frame 57 [Source:HGNC Symbol;Acc:HGNC:25486]	-	6523	5651	9	28	37.8742	36.5122	0.0937532	0.220316
ENSG00000135069	3264.39	3401.95	2.78316	6.26087	9.47352	1.67499e-38	5.27243e-36	PSAT1	9	78297143	78330093	+	2188	protein_coding	phosphoserine aminotransferase 1 [Source:HGNC Symbol;Acc:HGNC:19129]	Aminotran_5	4273	3983	2	6	55.029	57.0802	0.04621	0.104714
ENSG00000131016	6266.74	6144.51	29.2232	59.4782	7.11665	1.0972e-37	3.27883e-35	AKAP12	6	151239999	151358557	+	8741	protein_coding	A-kinase anchoring protein 12 [Source:HGNC Symbol;Acc:HGNC:370]	-	8203	7194	21	57	26.4434	25.8067	0.121454	0.249008
ENSG00000165300	2459.94	2415.44	5.56632	9.3913	8.31936	4.4651e-37	1.27003e-34	SLITRK5	13	87672615	87696272	+	21103	protein_coding	SLIT and NTRK like family member 5 [Source:HGNC Symbol;Acc:HGNC:20295]	-	3220	2828	4	9	4.2995	4.20202	0.00958229	0.0162854
ENSG00000149948	3694.49	3768.36	16.6989	3.13043	8.62028	1.19351e-36	3.35432e-34	HMGA2	12	65824131	65966295	+	15403	protein_coding	high mobility group AT-hook 2 [Source:HGNC Symbol;Acc:HGNC:5009]	-	4836	4412	12	3	8.84682	8.98158	0.0393849	0.00743729
ENSG00000154277	4837.37	5222.07	59.8379	53.2174	6.47727	1.68547e-36	4.6268e-34	UCHL1	4	41256413	41268455	+	2282	protein_coding	ubiquitin C-terminal hydrolase L1 [Source:HGNC Symbol;Acc:HGNC:12513]	-	6332	6114	43	51	78.1865	84.0103	0.952591	0.853401
ENSG00000085662	4905.36	4845.4	6.95789	0	10.61	2.83607e-36	7.52292e-34	AKR1B1	7	134442350	134459284	-	3660	protein_coding	aldo-keto reductase family 1 member B [Source:HGNC Symbol;Acc:HGNC:381]	Aldo_ket_red	6421	5673	5	0	49.4343	48.602	0.0690626	0
ENSG00000175414	2664.68	2531.6	4.17474	5.21739	9.0965	3.297e-36	8.55337e-34	ARL10	5	176365468	176401865	+	11459	protein_coding	ADP ribosylation factor like GTPase 10 [Source:HGNC Symbol;Acc:HGNC:22042]	-	3488	2964	3	5	8.57702	8.11062	0.0132351	0.0166618
ENSG00000102038	3012.28	2944.99	1.39158	8.34782	9.16721	4.18896e-36	1.06336e-33	SMARCA1	X	129446501	129523500	-	4363	protein_coding	SWI/SNF related, matrix associated, actin dependent regulator of chromatin, subfamily a, member 1 [Source:HGNC Symbol;Acc:HGNC:11097]	SNF2_N	3943	3448	1	8	25.4653	24.7802	0.0115869	0.070017
ENSG00000101871	4589.09	4368.81	54.2716	40.6956	6.56484	5.06814e-36	1.27286e-33	MID1	X	10445310	10833654	-	9295	protein_coding	midline 1 [Source:HGNC Symbol;Acc:HGNC:7095]	SPRY	6007	5115	39	39	18.2102	17.2552	0.212114	0.160219
ENSG00000152661	4102.45	4056.2	36.181	13.5652	7.38167	2.96274e-35	7.13719e-33	GJA1	6	121435692	121449727	+	3037	protein_coding	gap junction protein alpha 1 [Source:HGNC Symbol;Acc:HGNC:4274]	Connexin	5370	4749	26	13	49.8237	49.032	0.432795	0.163455
ENSG00000117114	3281.19	3495.04	29.2232	40.6956	6.59115	1.21556e-34	2.78611e-32	ADGRL2	1	81306160	81992436	+	7754	protein_coding	adhesion G protein-coupled receptor L2 [Source:HGNC Symbol;Acc:HGNC:18582]	7tm_2	4295	4092	21	39	15.6079	16.5475	0.136914	0.19206
ENSG00000125354	2147.48	2130.17	16.6989	10.4348	7.32067	1.60892e-34	3.65225e-32	2023-09-06	X	119615724	119693370	-	6245	protein_coding	septin 6 [Source:HGNC Symbol;Acc:HGNC:15848]	GTP_CDC	2811	2494	12	10	12.6834	12.5224	0.097141	0.0611458
ENSG00000006042	2030.6	1940.55	12.5242	13.5652	7.2464	2.12732e-34	4.73791e-32	TMEM98	17	32927910	32945106	+	5187	protein_coding	transmembrane protein 98 [Source:HGNC Symbol;Acc:HGNC:24529]	-	2658	2272	9	13	14.4393	13.7346	0.0877162	0.0957031
ENSG00000233276	4311.01	4301.33	1.39158	3.13043	10.8329	4.1778e-34	9.13237e-32	GPX1	3	49357171	49358600	-	1430	polymorphic_pseudogene	glutathione peroxidase 1 [Source:HGNC Symbol;Acc:HGNC:4553]	GSHPx	5643	5036	1	3	111.194	110.426	0.0353523	0.0801095
ENSG00000133124	17941.5	17313.8	1.39158	1.04348	13.8481	6.27324e-34	1.31061e-31	IRS4	X	108732482	108736409	-	3928	protein_coding	insulin receptor substrate 4 [Source:HGNC Symbol;Acc:HGNC:6128]	-	23485	20271	1	1	168.471	161.818	0.0128701	0.00972137
ENSG00000159164	2042.06	1973.86	9.74105	4.17391	8.2214	1.14829e-33	2.33696e-31	SV2A	1	149903318	149917882	-	4824	protein_coding	synaptic vesicle glycoprotein 2A [Source:HGNC Symbol;Acc:HGNC:20566]	Sugar_tr	2673	2311	7	4	15.6134	15.0216	0.0733575	0.031663
ENSG00000173705	1851.83	1851.72	4.17474	8.34782	8.16803	4.49472e-33	8.69765e-31	SUSD5	3	33150042	33219215	-	5008	protein_coding	sushi domain containing 5 [Source:HGNC Symbol;Acc:HGNC:29061]	Xlink	2424	2168	3	8	13.6388	13.5743	0.0302838	0.0609992
ENSG00000170558	1778.49	1816.71	11.1326	6.26087	7.72208	4.94698e-33	9.49498e-31	CDH2	18	27950966	28177446	-	4950	protein_coding	cadherin 2 [Source:HGNC Symbol;Acc:HGNC:1759]	Cadherin	2328	2127	8	6	13.2521	13.4736	0.0817031	0.0462855
ENSG00000134744	2655.51	2717.8	0	8.34782	9.20494	8.7054e-33	1.64414e-30	ZCCHC11	1	52408282	52553487	-	16199	protein_coding	zinc finger CCHC-type containing 11 [Source:HGNC Symbol;Acc:HGNC:28981]	NTP_transf_2	3476	3182	0	8	6.04642	6.15935	0	0.0188582
ENSG00000115355	3317.86	3416.47	8.34947	30.2609	7.41379	2.08374e-32	3.78406e-30	CCDC88A	2	55287842	55419895	-	33942	protein_coding	coiled-coil domain containing 88A [Source:HGNC Symbol;Acc:HGNC:25523]	-	4343	4000	6	29	3.60544	3.69526	0.0089365	0.0326257
ENSG00000166086	2631.83	2558.08	15.3074	31.3043	6.77931	5.79233e-32	1.04386e-29	JAM3	11	134068925	134152001	+	5451	protein_coding	junctional adhesion molecule 3 [Source:HGNC Symbol;Acc:HGNC:15532]	V-set	3445	2995	11	30	17.8082	17.2283	0.102016	0.210157
ENSG00000134871	4370.6	4335.5	45.9221	13.5652	7.21635	1.46736e-31	2.60462e-29	COL4A2	13	110305812	110513027	+	8706	protein_coding	collagen type IV alpha 2 chain [Source:HGNC Symbol;Acc:HGNC:2203]	Collagen	5721	5076	33	13	18.5165	18.2821	0.191624	0.0570195
ENSG00000111716	30892.9	31627.9	553.848	667.826	5.67707	2.69564e-31	4.57832e-29	LDHB	12	21635342	21757857	-	2983	protein_coding	lactate dehydrogenase B [Source:HGNC Symbol;Acc:HGNC:6541]	-	40438	37030	398	640	381.982	389.245	6.74502	8.19267
ENSG00000180667	1647.09	1669.8	11.1326	16.6956	6.88047	4.8663e-31	8.20597e-29	YOD1	1	207043849	207052980	-	6521	protein_coding	YOD1 deubiquitinase [Source:HGNC Symbol;Acc:HGNC:25035]	OTU	2156	1955	8	16	9.31625	9.40059	0.0620197	0.0936925
ENSG00000084207	11197.3	11115.5	2.78316	0	13.164	5.80572e-31	9.65221e-29	GSTP1	11	67583595	67586656	+	1911	protein_coding	glutathione S-transferase pi 1 [Source:HGNC Symbol;Acc:HGNC:4638]	GST_N	14657	13014	2	0	216.118	213.537	0.0529082	0
ENSG00000147257	1620.35	1548.51	15.3074	12.5217	6.83983	5.89701e-31	9.73542e-29	GPC3	X	133535745	133985895	-	2711	protein_coding	glypican 3 [Source:HGNC Symbol;Acc:HGNC:4451]	-	2121	1813	11	12	22.0454	20.9696	0.205124	0.169025
ENSG00000164683	6602.11	6704.81	119.676	130.435	5.73276	8.16336e-31	1.33834e-28	HEY1	8	79764010	79767863	-	3232	protein_coding	hes related family bHLH transcription factor with YRPW motif 1 [Source:HGNC Symbol;Acc:HGNC:4880]	HLH	8642	7850	86	125	75.3441	76.1589	1.34518	1.47685
ENSG00000137968	1349.91	1299.11	5.56632	7.30435	7.6688	1.14872e-29	1.76097e-27	SLC44A5	1	75202131	75611116	-	6299	protein_coding	solute carrier family 44 member 5 [Source:HGNC Symbol;Acc:HGNC:28524]	-	1767	1521	4	7	7.90444	7.57147	0.0321027	0.0424351
ENSG00000147889	5140.66	5380.08	83.4947	111.652	5.74969	1.4119e-29	2.15046e-27	CDKN2A	9	21967753	21995301	-	4329	protein_coding	cyclin dependent kinase inhibitor 2A [Source:HGNC Symbol;Acc:HGNC:1787]	-	6729	6299	60	107	43.7995	45.6254	0.700676	0.943833
ENSG00000128591	1736.47	1696.28	11.1326	2.08696	8.10231	1.57126e-29	2.37784e-27	FLNC	7	128830377	128859274	+	9280	protein_coding	filamin C [Source:HGNC Symbol;Acc:HGNC:3756]	CH	2273	1986	8	2	6.90173	6.71048	0.0435809	0.00822964
ENSG00000109113	1708.97	1553.64	1.39158	7.30435	8.46286	1.83332e-29	2.75676e-27	RAB34	17	28714281	28718429	-	3325	protein_coding	RAB34, member RAS oncogene family [Source:HGNC Symbol;Acc:HGNC:16519]	Ras	2237	1819	1	7	18.9575	17.1539	0.0152041	0.0803906
ENSG00000162409	1832.73	1942.26	0	6.26087	9.09695	8.29301e-29	1.20853e-26	PRKAA2	1	56645322	56715335	+	9354	protein_coding	protein kinase AMP-activated catalytic subunit alpha 2 [Source:HGNC Symbol;Acc:HGNC:9377]	Pkinase	2399	2274	0	6	7.22669	7.62282	0	0.0244936
ENSG00000166974	3132.22	2983.43	50.0968	61.5652	5.77201	8.45169e-29	1.22409e-26	MAPRE2	18	34976928	35143470	+	6180	protein_coding	microtubule associated protein RP/EB family member 2 [Source:HGNC Symbol;Acc:HGNC:6891]	CH	4100	3493	36	59	18.694	17.7228	0.294488	0.364554
ENSG00000107957	4260.59	4269.73	64.0126	21.913	6.64904	8.67642e-29	1.24898e-26	SH3PXD2A	10	103594027	103855543	-	11756	protein_coding	SH3 and PX domains 2A [Source:HGNC Symbol;Acc:HGNC:23664]	PX	5577	4999	46	21	13.3674	13.3336	0.197812	0.0682116
ENSG00000146592	1444.64	1457.12	11.1326	3.13043	7.73406	1.01782e-28	1.44751e-26	CREB5	7	28299321	28825894	+	11674	protein_coding	cAMP responsive element binding protein 5 [Source:HGNC Symbol;Acc:HGNC:16844]	bZIP_1	1891	1706	8	3	4.56434	4.58228	0.0346437	0.00981297
ENSG00000026652	1306.37	1214.55	6.95789	4.17391	7.85603	1.66079e-28	2.31999e-26	AGPAT4	6	161129979	161274061	-	8769	protein_coding	1-acylglycerol-3-phosphate O-acyltransferase 4 [Source:HGNC Symbol;Acc:HGNC:20885]	-	1710	1422	5	4	5.49481	5.08478	0.0288253	0.0174184
ENSG00000170689	2753.3	2881.79	50.0968	58.4348	5.69571	3.96068e-28	5.43626e-26	HOXB9	17	48621159	48626356	-	2581	protein_coding	homeobox B9 [Source:HGNC Symbol;Acc:HGNC:5120]	Hox9_act	3604	3374	36	56	39.3462	40.9902	0.705128	0.828512
ENSG00000198732	1437	1460.54	19.4821	9.3913	6.67723	5.72387e-28	7.76604e-26	SMOC1	14	69854131	70032366	+	4369	protein_coding	SPARC related modular calcium binding 1 [Source:HGNC Symbol;Acc:HGNC:20318]	-	1881	1710	14	9	12.1315	12.2726	0.161994	0.078661
ENSG00000149294	1153.57	1241.03	9.74105	12.5217	6.73719	5.77708e-28	7.79344e-26	NCAM1	11	112961247	113278436	+	12737	protein_coding	neural cell adhesion molecule 1 [Source:HGNC Symbol;Acc:HGNC:7656]	I-set	1510	1453	7	12	3.34054	3.57702	0.0277833	0.035976
ENSG00000240694	1155.1	1124.02	13.9158	9.3913	6.62971	4.55162e-27	5.9041e-25	PNMA2	8	26504686	26514092	-	5579	protein_coding	PNMA family member 2 [Source:HGNC Symbol;Acc:HGNC:9159]	-	1512	1316	10	9	7.63663	7.39643	0.0906144	0.0616006
ENSG00000133863	1254.42	1320.46	1.39158	8.34782	7.95827	4.71755e-27	6.08589e-25	TEX15	8	30831544	30913003	-	11864	protein_coding	testis expressed 15, meiosis and synapsis associated [Source:HGNC Symbol;Acc:HGNC:11738]	-	1642	1546	1	8	3.89985	4.08602	0.00426111	0.0257488
ENSG00000162738	2113.1	2090.02	43.1389	24	5.98107	7.49302e-27	9.40932e-25	VANGL2	1	160400586	160428678	+	5340	protein_coding	VANGL planar cell polarity protein 2 [Source:HGNC Symbol;Acc:HGNC:15511]	-	2766	2447	31	23	14.5954	14.3686	0.293477	0.16447
ENSG00000244509	1301.78	1266.65	1.39158	5.21739	8.5189	1.87468e-26	2.25803e-24	APOBEC3C	22	39014083	39020352	+	2818	protein_coding	apolipoprotein B mRNA editing enzyme catalytic subunit 3C [Source:HGNC Symbol;Acc:HGNC:17353]	-	1704	1483	1	5	17.0386	16.5015	0.0179396	0.0677529
ENSG00000082269	1177.26	1234.2	9.74105	17.7391	6.43176	2.4809e-26	2.97305e-24	FAM135A	6	70412941	70561174	+	10589	protein_coding	family with sequence similarity 135 member A [Source:HGNC Symbol;Acc:HGNC:21084]	-	1541	1445	7	17	4.10066	4.27893	0.0334193	0.0613046
ENSG00000067445	1440.06	1518.62	25.0484	10.4348	6.40997	4.65268e-26	5.51962e-24	TRO	X	54920462	54931431	+	6716	protein_coding	trophinin [Source:HGNC Symbol;Acc:HGNC:12326]	MAGE	1885	1778	18	10	7.90874	8.30125	0.135493	0.0568575
ENSG00000138829	4626.52	4686.54	126.634	79.3043	5.50309	5.11551e-26	6.03835e-24	FBN2	5	128257909	128659185	-	13196	protein_coding	fibrillin 2 [Source:HGNC Symbol;Acc:HGNC:3604]	EGF_CA	6056	5487	91	76	12.9315	13.0381	0.34862	0.219923
ENSG00000079215	1295.67	1429.79	19.4821	6.26087	6.76844	6.78769e-26	7.93286e-24	SLC1A3	5	36606355	36688334	+	6265	protein_coding	solute carrier family 1 member 3 [Source:HGNC Symbol;Acc:HGNC:10941]	SDF	1696	1674	14	6	7.62801	8.37832	0.112969	0.0365703
ENSG00000111275	1042.8	1071.92	2.78316	5.21739	8.00352	8.8061e-26	1.01412e-23	ALDH2	12	111766887	111817529	+	9720	protein_coding	aldehyde dehydrogenase 2 family (mitochondrial) [Source:HGNC Symbol;Acc:HGNC:404]	Aldedh	1365	1255	2	5	3.95706	4.04856	0.010402	0.0196428
ENSG00000116729	4710.56	4713.01	133.592	118.956	5.22257	1.10765e-25	1.26939e-23	WLS	1	68098473	68233120	-	4469	protein_coding	wntless Wnt ligand secretion mediator [Source:HGNC Symbol;Acc:HGNC:30238]	-	6166	5518	96	114	38.8776	38.7163	1.08596	0.974077
ENSG00000104722	15089.7	14242.4	0	0	16.0138	1.50247e-25	1.71354e-23	NEFM	8	24913012	24919098	+	4381	protein_coding	neurofilament medium [Source:HGNC Symbol;Acc:HGNC:7734]	Filament	19752	16675	0	0	127.041	119.348	0	0
ENSG00000070882	1296.43	1235.91	0	7.30435	8.3068	1.92069e-25	2.16955e-23	OSBPL3	7	24796539	24981634	-	8100	protein_coding	oxysterol binding protein like 3 [Source:HGNC Symbol;Acc:HGNC:16370]	-	1697	1447	0	7	5.90341	5.60152	0	0.0329998
ENSG00000118495	3328.56	3243.93	51.4884	88.6956	5.54458	3.52782e-25	3.82041e-23	PLAGL1	6	143940300	144064599	-	8719	protein_coding	PLAG1 like zinc finger 1 [Source:HGNC Symbol;Acc:HGNC:9046]	-	4357	3798	37	85	14.0808	13.6587	0.21453	0.372264
ENSG00000139044	1223.86	1217.12	22.2653	20.8696	5.82456	3.70074e-25	3.95326e-23	B4GALNT3	12	460364	563509	+	6357	protein_coding	beta-1,4-N-acetyl-galactosaminyltransferase 3 [Source:HGNC Symbol;Acc:HGNC:24137]	-	1602	1425	16	20	7.10095	7.02887	0.127239	0.120137
ENSG00000087303	941.958	992.483	2.78316	8.34782	7.38069	4.28219e-25	4.53336e-23	NID2	14	52004803	52069228	-	6392	protein_coding	nidogen 2 [Source:HGNC Symbol;Acc:HGNC:13389]	EGF_CA	1233	1162	2	8	5.43542	5.70022	0.0158178	0.0477917
ENSG00000154734	3104.72	3120.94	89.061	63.6522	5.35334	4.80247e-25	5.06146e-23	ADAMTS1	21	26835747	26845409	-	7063	protein_coding	ADAM metallopeptidase with thrombospondin type 1 motif 1 [Source:HGNC Symbol;Acc:HGNC:217]	TSP_1	4064	3654	64	61	16.2133	16.2219	0.458083	0.329791
ENSG00000010295	1158.92	1152.2	2.78316	3.13043	8.6012	5.0715e-25	5.32125e-23	IFFO1	12	6538375	6556083	-	5203	protein_coding	intermediate filament family orphan 1 [Source:HGNC Symbol;Acc:HGNC:24970]	-	1517	1349	2	3	8.21558	8.12982	0.0194326	0.0220174
ENSG00000261409	12409.7	12195.1	0	0	15.7602	8.4623e-25	8.72393e-23	AL035425.3	X	108719949	108724944	-	4996	sense_overlapping	-	-	16244	14278	0	0	91.6172	89.6123	0	0
ENSG00000168916	964.877	990.775	4.17474	3.13043	8.08584	1.35614e-24	1.37406e-22	ZNF608	5	124636913	124748807	-	6922	protein_coding	zinc finger protein 608 [Source:HGNC Symbol;Acc:HGNC:29238]	-	1263	1160	3	3	5.14136	5.25471	0.02191	0.0165496
ENSG00000184058	1479.78	1490.43	27.8316	9.3913	6.34974	1.76913e-24	1.77726e-22	TBX1	22	19756703	19783593	+	3496	protein_coding	T-box 1 [Source:HGNC Symbol;Acc:HGNC:11592]	T-box	1937	1745	20	9	15.6122	15.6512	0.289209	0.0983037
ENSG00000110811	1138.3	1151.35	18.0905	5.21739	6.6659	3.84321e-24	3.71846e-22	P3H3	12	6828410	6839851	+	4601	protein_coding	prolyl 3-hydroxylase 3 [Source:HGNC Symbol;Acc:HGNC:19318]	-	1490	1348	13	5	9.12516	9.18672	0.142838	0.041497
ENSG00000135272	977.864	1059.96	19.4821	12.5217	6.00931	4.84785e-24	4.67135e-22	MDFIC	7	114922154	115019202	+	5252	protein_coding	MyoD family inhibitor domain containing [Source:HGNC Symbol;Acc:HGNC:28870]	-	1280	1241	14	12	6.86739	7.40917	0.134759	0.087248
ENSG00000169515	1065.72	1123.16	5.56632	1.04348	8.47924	4.91493e-24	4.71673e-22	CCDC8	19	46410372	46413584	-	3213	protein_coding	coiled-coil domain containing 8 [Source:HGNC Symbol;Acc:HGNC:25367]	-	1395	1315	4	1	12.234	12.8333	0.0629366	0.0118847
ENSG00000116962	10315.7	10175.9	0	0	15.4963	5.02107e-24	4.79909e-22	NID1	1	235975830	236065162	-	5864	protein_coding	nidogen 1 [Source:HGNC Symbol;Acc:HGNC:7821]	EGF_CA	13503	11914	0	0	64.8848	63.7069	0	0
ENSG00000203867	935.847	783.225	12.5242	9.3913	6.30715	7.76132e-24	7.29997e-22	RBM20	10	110644397	110839469	+	8162	protein_coding	RNA binding motif protein 20 [Source:HGNC Symbol;Acc:HGNC:27424]	-	1225	917	9	9	4.22908	3.52286	0.0557442	0.0421061
ENSG00000169860	776.944	822.514	4.17474	5.21739	7.39693	1.08973e-23	1.00888e-21	P2RY1	3	152834693	152841439	+	6747	protein_coding	purinergic receptor P2Y1 [Source:HGNC Symbol;Acc:HGNC:8539]	7tm_1	1017	963	3	5	4.24734	4.47546	0.0224783	0.0282982
ENSG00000050555	1624.17	1633.07	37.5726	14.6087	5.98613	1.44528e-23	1.31231e-21	LAMC3	9	131009082	131094473	+	7594	protein_coding	laminin subunit gamma 3 [Source:HGNC Symbol;Acc:HGNC:6494]	Laminin_EGF	2126	1912	27	14	7.88858	7.89478	0.179741	0.0703973
ENSG00000126016	24579.5	23742.7	903.135	702.261	4.91202	1.47377e-23	1.33305e-21	AMOT	X	112774503	112840815	-	8502	protein_coding	angiomotin [Source:HGNC Symbol;Acc:HGNC:17810]	-	32174	27798	649	673	106.633	102.522	3.85902	3.02268
ENSG00000122786	4427.89	4566.96	65.4042	135.652	5.47767	1.89558e-23	1.68871e-21	CALD1	7	134744252	134970728	+	9843	protein_coding	caldesmon 1 [Source:HGNC Symbol;Acc:HGNC:1441]	-	5796	5347	47	130	16.5923	17.0336	0.241393	0.50433
ENSG00000145703	1057.32	986.505	0	8.34782	7.81277	2.21752e-23	1.96809e-21	IQGAP2	5	76403249	76708132	+	7904	protein_coding	IQ motif containing GTPase activating protein 2 [Source:HGNC Symbol;Acc:HGNC:6111]	CH	1384	1155	0	8	4.93396	4.58203	0	0.0386493
ENSG00000174607	782.291	715.75	5.56632	7.30435	6.84675	2.43766e-23	2.13934e-21	UGT8	4	114598455	114678224	+	4699	protein_coding	UDP glycosyltransferase 8 [Source:HGNC Symbol;Acc:HGNC:12555]	UDPGT	1024	838	4	7	6.14046	5.59192	0.0430337	0.0568842
ENSG00000089327	1107.74	1117.18	2.78316	2.08696	8.85915	3.22988e-23	2.80621e-21	FXYD5	19	35154730	35169883	+	2993	protein_coding	FXYD domain containing ion transport regulator 5 [Source:HGNC Symbol;Acc:HGNC:4029]	-	1450	1308	2	2	13.6511	13.7033	0.0337813	0.0255166
ENSG00000184613	880.842	878.032	15.3074	14.6087	5.87946	3.23318e-23	2.80621e-21	NELL2	12	44508275	44921848	-	6424	protein_coding	neural EGFL like 2 [Source:HGNC Symbol;Acc:HGNC:7751]	EGF_CA	1153	1028	11	14	5.05743	5.01776	0.0865647	0.0832188
ENSG00000132205	903.761	878.886	16.6989	15.6522	5.78655	5.74955e-23	4.90019e-21	EMILIN2	18	2847030	2915993	+	6435	protein_coding	elastin microfibril interfacer 2 [Source:HGNC Symbol;Acc:HGNC:19881]	-	1183	1029	12	15	5.18015	5.01406	0.0942728	0.0890106
ENSG00000198681	2932.83	2980.87	2.78316	0	11.2477	5.97136e-23	5.07093e-21	MAGEA1	X	153179285	153183880	+	1710	protein_coding	MAGE family member A1 [Source:HGNC Symbol;Acc:HGNC:6796]	MAGE	3839	3490	2	0	63.2599	63.9959	0.0591272	0
ENSG00000068366	2506.54	2368.47	8.34947	43.8261	6.5187	8.17129e-23	6.79253e-21	ACSL4	X	109624244	109733403	-	6415	protein_coding	acyl-CoA synthetase long chain family member 4 [Source:HGNC Symbol;Acc:HGNC:3571]	AMP-binding	3281	2773	6	42	14.4117	13.5543	0.0472834	0.250007
ENSG00000118971	1471.38	1422.1	2.78316	1.04348	9.64304	9.49508e-23	7.78332e-21	CCND2	12	4273772	4305350	+	7157	protein_coding	cyclin D2 [Source:HGNC Symbol;Acc:HGNC:1583]	Cyclin_C	1926	1665	2	1	7.58284	7.29467	0.0141271	0.00533541
ENSG00000254535	818.961	829.347	4.17474	12.5217	6.57556	1.17522e-22	9.53419e-21	PABPC4L	4	134196333	134201748	-	4944	protein_coding	poly(A) binding protein cytoplasmic 4 like [Source:HGNC Symbol;Acc:HGNC:31955]	RRM_1	1072	971	3	12	6.10974	6.15834	0.0306758	0.0926833
ENSG00000145362	1047.38	1064.23	4.17474	1.04348	8.76097	1.2143e-22	9.81756e-21	ANK2	4	112818109	113383740	+	18224	protein_coding	ankyrin 2 [Source:HGNC Symbol;Acc:HGNC:493]	Death	1371	1246	3	1	2.11983	2.14386	0.00832207	0.00209534
ENSG00000148516	956.474	917.321	0	8.34782	7.68774	1.30342e-22	1.04309e-20	ZEB1	10	31318495	31529814	+	8650	protein_coding	zinc finger E-box binding homeobox 1 [Source:HGNC Symbol;Acc:HGNC:11642]	-	1252	1074	0	8	4.07845	3.89324	0	0.0353161
ENSG00000114948	815.906	834.472	6.95789	14.6087	6.22585	1.31e-22	1.04481e-20	ADAM23	2	206443539	206621130	+	6421	protein_coding	ADAM metallopeptidase domain 23 [Source:HGNC Symbol;Acc:HGNC:202]	-	1068	977	5	14	4.68678	4.77106	0.039366	0.0832577
ENSG00000187984	741.802	710.625	8.34947	10.4348	6.26159	1.41087e-22	1.11771e-20	ANKRD19P	9	92809388	92888693	+	2947	transcribed_unprocessed_pseudogene	ankyrin repeat domain 19, pseudogene [Source:HGNC Symbol;Acc:HGNC:22567]	-	971	832	6	10	9.28422	8.8525	0.102926	0.129574
ENSG00000196368	1122.25	1130.85	27.8316	13.5652	5.7878	1.55528e-22	1.228e-20	NUDT11	X	51490011	51496596	-	2385	protein_coding	nudix hydrolase 11 [Source:HGNC Symbol;Acc:HGNC:18011]	NUDIX	1469	1324	20	13	17.3556	17.4069	0.423931	0.208139
ENSG00000128602	2744.9	2711.82	2.78316	0	11.1316	1.67826e-22	1.32068e-20	SMO	7	129188872	129213545	+	4311	protein_coding	smoothened, frizzled class receptor [Source:HGNC Symbol;Acc:HGNC:11119]	Fz	3593	3175	2	0	23.4847	23.0934	0.0234534	0
ENSG00000253293	769.304	833.618	11.1326	3.13043	6.87639	2.02697e-22	1.58452e-20	HOXA10	7	27170591	27180261	-	3707	protein_coding	homeobox A10 [Source:HGNC Symbol;Acc:HGNC:5100]	-	1007	976	8	3	7.65444	8.25562	0.109099	0.0309028
ENSG00000106004	1835.79	2161.77	64.0126	54.2609	5.08138	2.10706e-22	1.6417e-20	HOXA5	7	27141052	27143668	-	1707	protein_coding	homeobox A5 [Source:HGNC Symbol;Acc:HGNC:5106]	Homeobox	2403	2531	46	52	39.6668	46.4923	1.36232	1.16324
ENSG00000116141	1006.89	1043.73	15.3074	25.0435	5.65189	2.14294e-22	1.66416e-20	MARK1	1	220528183	220664461	+	5417	protein_coding	microtubule affinity regulating kinase 1 [Source:HGNC Symbol;Acc:HGNC:6896]	Pkinase	1318	1222	11	24	6.85588	7.07351	0.102657	0.169181
ENSG00000144712	1281.16	1159.89	25.0484	33.3913	5.37714	2.24919e-22	1.73525e-20	CAND2	3	12796472	12871916	+	5478	protein_coding	cullin associated and neddylation dissociated 2 (putative) [Source:HGNC Symbol;Acc:HGNC:30689]	-	1677	1358	18	32	8.62616	7.77321	0.166113	0.223063
ENSG00000074047	801.39	765.288	5.56632	2.08696	7.74498	2.48447e-22	1.89817e-20	GLI2	2	120735623	120992653	+	7341	protein_coding	GLI family zinc finger 2 [Source:HGNC Symbol;Acc:HGNC:4318]	-	1049	896	4	2	4.02649	3.82715	0.027546	0.0104034
ENSG00000146409	1869.4	1870.52	34.7895	59.4782	5.30121	2.51605e-22	1.91609e-20	SLC18B1	6	132769370	132798553	-	2444	protein_coding	solute carrier family 18 member B1 [Source:HGNC Symbol;Acc:HGNC:21573]	MFS_1	2447	2190	25	57	28.2123	28.0974	0.517121	0.890579
ENSG00000156140	863.271	853.262	0	7.30435	7.7471	5.40192e-22	4.02298e-20	ADAMTS3	4	72280969	72569386	-	7172	protein_coding	ADAM metallopeptidase with thrombospondin type 1 motif 3 [Source:HGNC Symbol;Acc:HGNC:219]	TSP_1	1130	999	0	7	4.43961	4.36765	0	0.0372698
ENSG00000196628	1283.45	1305.94	1.39158	2.08696	9.50575	5.96463e-22	4.42808e-20	TCF4	18	55222331	55664787	-	27828	protein_coding	transcription factor 4 [Source:HGNC Symbol;Acc:HGNC:11634]	HLH	1680	1529	1	2	1.70112	1.72285	0.00181665	0.0027444
ENSG00000159184	816.67	912.196	19.4821	16.6956	5.58403	7.80339e-22	5.70348e-20	HOXB13	17	48724763	48729178	-	3467	protein_coding	homeobox B13 [Source:HGNC Symbol;Acc:HGNC:5112]	Homeobox	1069	1068	14	16	8.68821	9.65917	0.20414	0.176224
ENSG00000175183	1841.9	1787.67	59.8379	56.3478	4.96623	9.18645e-22	6.67304e-20	CSRP2	12	76858715	76879060	-	5873	protein_coding	cysteine and glycine rich protein 2 [Source:HGNC Symbol;Acc:HGNC:2470]	LIM	2411	2093	43	54	11.5676	11.1746	0.370137	0.351101
ENSG00000128573	838.06	732.832	2.78316	3.13043	8.04431	9.37099e-22	6.7862e-20	FOXP2	7	114086327	114693772	+	16152	protein_coding	forkhead box P2 [Source:HGNC Symbol;Acc:HGNC:13875]	-	1097	858	2	3	1.91376	1.66565	0.00625976	0.00709241
ENSG00000143869	666.17	663.649	9.74105	9.3913	6.12091	1.13002e-21	8.15826e-20	GDF7	2	20666664	20679245	+	9749	protein_coding	growth differentiation factor 7 [Source:HGNC Symbol;Acc:HGNC:4222]	TGFb_propeptide	872	777	7	9	2.52036	2.4991	0.0362988	0.0352518
ENSG00000196730	956.474	985.65	26.44	17.7391	5.47033	1.45566e-21	1.04137e-19	DAPK1	9	87497228	87708633	+	8907	protein_coding	death associated protein kinase 1 [Source:HGNC Symbol;Acc:HGNC:2674]	Pkinase	1252	1154	19	17	3.96077	4.06253	0.107839	0.0728813
ENSG00000172828	667.698	632.046	9.74105	5.21739	6.47546	1.97203e-21	1.40228e-19	CES3	16	66961237	66975148	+	4935	protein_coding	carboxylesterase 3 [Source:HGNC Symbol;Acc:HGNC:1865]	COesterase	874	740	7	5	4.99035	4.70183	0.0717075	0.0386885
ENSG00000180447	741.038	796.891	11.1326	2.08696	6.94168	2.31006e-21	1.63281e-19	GAS1	9	86944363	86947189	-	2827	protein_coding	growth arrest specific 1 [Source:HGNC Symbol;Acc:HGNC:4165]	-	970	933	8	2	9.66835	10.3485	0.14306	0.0270149
ENSG00000082397	2189.5	2242.91	1.39158	1.04348	10.8563	2.39559e-21	1.68821e-19	EPB41L3	18	5392381	5630700	-	12203	protein_coding	erythrocyte membrane protein band 4.1 like 3 [Source:HGNC Symbol;Acc:HGNC:3380]	Band_41	2866	2626	1	1	6.61784	6.74762	0.00414273	0.00312919
ENSG00000250742	653.183	646.566	2.78316	7.30435	6.95345	2.52657e-21	1.77521e-19	LINC02381	12	54126098	54142493	+	2310	lincRNA	long intergenic non-protein coding RNA 2381 [Source:HGNC Symbol;Acc:HGNC:53304]	-	855	757	2	7	10.4294	10.2756	0.0437695	0.115714
ENSG00000183798	1216.22	1117.18	2.78316	1.04348	9.33246	2.57843e-21	1.80628e-19	EMILIN3	20	41359966	41366827	-	3796	protein_coding	elastin microfibril interfacer 3 [Source:HGNC Symbol;Acc:HGNC:16123]	-	1592	1308	2	1	11.8174	10.8045	0.0266353	0.0100594
ENSG00000250337	662.35	576.529	6.95789	8.34782	6.32886	3.38543e-21	2.34379e-19	PURPL	5	27472292	27496401	+	2638	lincRNA	p53 upregulated regulator of p53 levels [Source:HGNC Symbol;Acc:HGNC:48995]	-	867	675	5	8	9.26085	8.02327	0.0958184	0.115801
ENSG00000105997	605.054	660.232	5.56632	3.13043	7.22411	4.56938e-21	3.13587e-19	HOXA3	7	27106184	27152581	-	4306	protein_coding	homeobox A3 [Source:HGNC Symbol;Acc:HGNC:5104]	Homeobox	792	773	4	3	5.18272	5.62896	0.0469613	0.0266039
ENSG00000146373	739.51	805.432	0	7.30435	7.5957	4.64554e-21	3.1789e-19	RNF217	6	124962545	125092633	+	12779	protein_coding	ring finger protein 217 [Source:HGNC Symbol;Acc:HGNC:21487]	IBR	968	943	0	7	2.13444	2.31386	0	0.020917
ENSG00000118922	1494.3	1426.37	8.34947	34.4348	6.06253	4.73901e-21	3.23348e-19	KLF12	13	73686089	73995056	-	10923	protein_coding	Kruppel like factor 12 [Source:HGNC Symbol;Acc:HGNC:6346]	zf-C2H2	1956	1670	6	33	5.04584	4.79399	0.0277692	0.115364
ENSG00000162493	920.568	889.989	0	4.17391	8.60762	5.76406e-21	3.88794e-19	PDPN	1	13583465	13617957	+	3707	protein_coding	podoplanin [Source:HGNC Symbol;Acc:HGNC:29602]	-	1205	1042	0	4	9.15948	8.81389	0	0.0412037
ENSG00000005073	621.097	605.569	4.17474	4.17391	7.199	5.9577e-21	4.00711e-19	HOXA11	7	27181510	27185223	-	2307	protein_coding	homeobox A11 [Source:HGNC Symbol;Acc:HGNC:5101]	Homeobox	813	709	3	4	9.93	9.63654	0.0657396	0.0662081
ENSG00000155980	622.625	662.794	11.1326	5.21739	6.3359	6.48101e-21	4.34553e-19	KIF5A	12	57549998	57586632	+	6261	protein_coding	kinesin family member 5A [Source:HGNC Symbol;Acc:HGNC:6323]	Kinesin	815	776	8	5	3.66792	3.88634	0.0645952	0.0304948
ENSG00000060982	2512.65	2696.45	20.8737	72	5.79467	6.49768e-21	4.34553e-19	BCAT1	12	24810022	24949459	-	11775	protein_coding	branched chain amino acid transaminase 1 [Source:HGNC Symbol;Acc:HGNC:976]	-	3289	3157	15	69	7.87063	8.40691	0.0643997	0.223762
ENSG00000108001	623.389	619.234	9.74105	11.4783	5.86412	1.50608e-20	9.79494e-19	EBF3	10	129835283	129963841	-	4623	protein_coding	early B cell factor 3 [Source:HGNC Symbol;Acc:HGNC:19087]	TIG	816	725	7	11	4.97362	4.91741	0.0765469	0.0908589
ENSG00000213949	551.577	593.611	4.17474	6.26087	6.75251	1.51421e-20	9.82073e-19	ITGA1	5	52787896	52959210	+	18566	protein_coding	integrin subunit alpha 1 [Source:HGNC Symbol;Acc:HGNC:6134]	VWA	722	695	3	6	1.09578	1.17379	0.00816877	0.0123405
ENSG00000072041	4189.54	4151.01	0	0	14.1995	2.11258e-20	1.34794e-18	SLC6A15	12	84859488	84913615	-	8781	protein_coding	solute carrier family 6 member 15 [Source:HGNC Symbol;Acc:HGNC:13621]	SNF	5484	4860	0	0	17.5979	17.3546	0	0
ENSG00000079931	1056.55	983.088	1.39158	2.08696	9.16157	2.13327e-20	1.35748e-18	MOXD1	6	132296055	132401545	-	5293	protein_coding	monooxygenase DBH like 1 [Source:HGNC Symbol;Acc:HGNC:21063]	Cu2_monooxygen	1383	1151	1	2	7.36252	6.81861	0.00955107	0.0144287
ENSG00000166313	2035.94	2072.09	41.7474	6.26087	6.44974	2.40445e-20	1.52183e-18	APBB1	11	6395124	6419414	-	5244	protein_coding	amyloid beta precursor protein binding family B member 1 [Source:HGNC Symbol;Acc:HGNC:581]	PID	2665	2426	30	6	14.3199	14.5061	0.289209	0.0436905
ENSG00000187772	4027.58	4126.24	0	0	14.1669	2.58759e-20	1.63337e-18	LIN28B	6	104936616	105083332	+	6002	protein_coding	lin-28 homolog B [Source:HGNC Symbol;Acc:HGNC:32207]	CSD	5272	4831	0	0	24.7506	25.2385	0	0
ENSG00000147065	7955.08	7751.96	0	1.04348	13.6823	3.22059e-20	2.02751e-18	MSN	X	65588377	65741931	+	5971	protein_coding	moesin [Source:HGNC Symbol;Acc:HGNC:7373]	-	10413	9076	0	1	49.14	47.6618	0	0.00639516
ENSG00000277586	3929.03	3956.27	0	0	14.1185	3.47937e-20	2.1846e-18	NEFL	8	24950955	24957110	-	4329	protein_coding	neurofilament light [Source:HGNC Symbol;Acc:HGNC:7739]	Filament	5143	4632	0	0	33.4761	33.5509	0	0
ENSG00000182963	1783.07	1764.6	2.78316	0	10.5101	3.64021e-20	2.27349e-18	GJC1	17	44798448	44830816	-	8660	protein_coding	gap junction protein gamma 1 [Source:HGNC Symbol;Acc:HGNC:4280]	Connexin	2334	2066	2	0	7.59433	7.48058	0.0116752	0
ENSG00000104368	864.799	752.477	0	4.17391	8.44535	4.14039e-20	2.55212e-18	PLAT	8	42175233	42207724	-	6618	protein_coding	plasminogen activator, tissue type [Source:HGNC Symbol;Acc:HGNC:9051]	Trypsin	1132	881	0	4	4.81977	4.17419	0	0.0230798
ENSG00000184486	722.703	656.816	0	6.26087	7.64775	4.37607e-20	2.68338e-18	POU3F2	6	98834592	98839470	+	4879	protein_coding	POU class 3 homeobox 2 [Source:HGNC Symbol;Acc:HGNC:9215]	Pou	946	769	0	6	5.46345	4.94217	0	0.046959
ENSG00000186310	981.684	1006.15	11.1326	29.2174	5.5965	5.57942e-20	3.41241e-18	NAP1L3	X	93670930	93673568	-	2639	protein_coding	nucleosome assembly protein 1 like 3 [Source:HGNC Symbol;Acc:HGNC:7639]	-	1285	1178	8	28	13.7205	13.9968	0.153251	0.405152
ENSG00000197565	947.306	934.403	2.78316	1.04348	9.02187	5.97029e-20	3.63265e-18	COL4A6	X	108155607	108439497	-	9282	protein_coding	collagen type IV alpha 6 chain [Source:HGNC Symbol;Acc:HGNC:2208]	Collagen	1240	1094	2	1	3.76432	3.69571	0.0108929	0.00411393
ENSG00000131668	1725.78	1649.3	2.78316	0	10.438	6.72889e-20	4.0628e-18	BARX1	9	93951622	93955372	-	1777	protein_coding	BARX homeobox 1 [Source:HGNC Symbol;Acc:HGNC:955]	Homeobox	2259	1931	2	0	35.8208	34.0736	0.0568979	0
ENSG00000177707	1020.65	1089	30.6147	36.5217	4.96966	8.05219e-20	4.82477e-18	NECTIN3	3	111070071	111275563	+	6184	protein_coding	nectin cell adhesion molecule 3 [Source:HGNC Symbol;Acc:HGNC:17664]	V-set	1336	1275	22	35	6.08756	6.46492	0.179849	0.216121
ENSG00000151468	681.449	696.105	0	5.21739	7.9006	8.64336e-20	5.13986e-18	CCDC3	10	12896625	13099652	-	3683	protein_coding	coiled-coil domain containing 3 [Source:HGNC Symbol;Acc:HGNC:23813]	-	892	815	0	5	6.82448	6.93871	0	0.0518403
ENSG00000186470	582.899	595.319	12.5242	6.26087	6.00434	9.52024e-20	5.63293e-18	BTN3A2	6	26365159	26378320	+	7042	protein_coding	butyrophilin subfamily 3 member A2 [Source:HGNC Symbol;Acc:HGNC:1139]	V-set	763	697	9	6	3.05306	3.10355	0.0646101	0.0325352
ENSG00000137310	652.419	641.442	6.95789	15.6522	5.80557	1.4004e-19	8.18331e-18	TCF19	6	31158542	31167159	+	3538	protein_coding	transcription factor 19 [Source:HGNC Symbol;Acc:HGNC:11629]	-	854	751	5	15	6.80153	6.65587	0.071444	0.161895
ENSG00000181690	569.912	507.345	6.95789	9.3913	6.02635	1.40735e-19	8.20366e-18	PLAG1	8	56160904	56211324	-	7833	protein_coding	PLAG1 zinc finger [Source:HGNC Symbol;Acc:HGNC:9045]	-	746	594	5	9	2.6836	2.37783	0.0322697	0.0438746
ENSG00000018510	3304.11	3371.2	0	0	13.8782	1.50863e-19	8.72937e-18	AGPS	2	177392644	177559299	+	8965	protein_coding	alkylglycerone phosphate synthase [Source:HGNC Symbol;Acc:HGNC:327]	FAD_binding_4	4325	3947	0	0	13.5938	13.8051	0	0
ENSG00000196632	534.77	625.213	11.1326	11.4783	5.67948	1.66275e-19	9.57422e-18	WNK3	X	54192823	54358642	-	11472	protein_coding	WNK lysine deficient protein kinase 3 [Source:HGNC Symbol;Acc:HGNC:14543]	Pkinase	700	732	8	11	1.71935	2.00076	0.0352537	0.0366144
ENSG00000134874	3230.01	3211.48	0	0	13.8268	2.05705e-19	1.17586e-17	DZIP1	13	95578202	95644703	-	8470	protein_coding	DAZ interacting zinc finger protein 1 [Source:HGNC Symbol;Acc:HGNC:20908]	-	4228	3760	0	0	14.0656	13.9196	0	0
ENSG00000091136	3262.86	3021.86	137.766	67.8261	4.93954	2.33193e-19	1.32039e-17	LAMB1	7	107923799	108003255	-	8140	protein_coding	laminin subunit beta 1 [Source:HGNC Symbol;Acc:HGNC:6486]	Laminin_EGF	4271	3538	99	65	14.7847	13.6287	0.614843	0.304921
ENSG00000180964	3100.14	3080.8	0	0	13.7672	2.9449e-19	1.66324e-17	TCEAL8	X	103252995	103255203	-	1222	protein_coding	transcription elongation factor A like 8 [Source:HGNC Symbol;Acc:HGNC:28683]	-	4058	3607	0	0	93.5723	92.5545	0	0
ENSG00000106066	1527.15	1574.99	0	2.08696	10.3657	3.17674e-19	1.77717e-17	CPVL	7	28995231	29195451	-	3340	protein_coding	carboxypeptidase, vitellogenic like [Source:HGNC Symbol;Acc:HGNC:14399]	Peptidase_S10	1999	1844	0	2	16.8645	17.3116	0	0.0228656
ENSG00000185222	3065.76	3040.65	0	0	13.7497	3.27162e-19	1.82592e-17	TCEAL9	X	103356489	103358462	+	1974	protein_coding	transcription elongation factor A like 9 [Source:HGNC Symbol;Acc:HGNC:30084]	-	4013	3560	0	0	57.2834	56.5491	0	0
ENSG00000099810	1216.98	1265.8	6.95789	33.3913	5.91028	3.60027e-19	2.00223e-17	MTAP	9	21802543	21937651	+	14617	protein_coding	methylthioadenosine phosphorylase [Source:HGNC Symbol;Acc:HGNC:7413]	-	1593	1482	5	32	3.07089	3.17916	0.0172928	0.083597
ENSG00000146122	780	740.519	22.2653	8.34782	5.66737	3.68687e-19	2.04318e-17	DAAM2	6	39792298	39904877	+	12955	protein_coding	dishevelled associated activator of morphogenesis 2 [Source:HGNC Symbol;Acc:HGNC:18143]	FH2	1021	867	16	8	2.22072	2.09848	0.0624362	0.0235804
ENSG00000165495	478.237	501.366	4.17474	5.21739	6.68991	4.1562e-19	2.2836e-17	PKNOX2	11	125164687	125433389	+	6538	protein_coding	PBX/knotted 1 homeobox 2 [Source:HGNC Symbol;Acc:HGNC:16714]	Coprinus_mating	626	587	3	5	2.69796	2.81524	0.0231969	0.0292028
ENSG00000128714	2782.33	3025.28	0	0	13.6773	5.12597e-19	2.78834e-17	HOXD13	2	176092891	176095938	+	2240	protein_coding	homeobox D13 [Source:HGNC Symbol;Acc:HGNC:5136]	Homeobox	3642	3542	0	0	45.814	49.5819	0	0
ENSG00000204525	3236.12	2563.2	0	0	13.6753	5.76468e-19	3.12139e-17	HLA-C	6	31268749	31272130	-	2507	protein_coding	major histocompatibility complex, class I, C [Source:HGNC Symbol;Acc:HGNC:4933]	MHC_I	4236	3001	0	0	47.6111	37.5348	0	0
ENSG00000128918	703.604	714.896	18.0905	21.913	5.14184	6.37332e-19	3.43519e-17	ALDH1A2	15	57953424	58497866	-	8622	protein_coding	aldehyde dehydrogenase 1 family member A2 [Source:HGNC Symbol;Acc:HGNC:15472]	-	921	837	13	21	3.00994	3.04397	0.0762235	0.0930058
ENSG00000038427	2858.73	2778.44	0	0	13.6344	6.53448e-19	3.51403e-17	VCAN	5	83471465	83582303	+	14831	protein_coding	versican [Source:HGNC Symbol;Acc:HGNC:2464]	Xlink	3742	3253	0	0	7.10951	6.87759	0	0
ENSG00000125931	658.531	595.319	18.0905	10.4348	5.47934	7.52199e-19	4.01763e-17	CITED1	X	72301638	72307187	-	1760	protein_coding	Cbp/p300 interacting transactivator with Glu/Asp rich carboxy-terminal domain 1 [Source:HGNC Symbol;Acc:HGNC:1986]	-	862	697	13	10	13.8007	12.4177	0.373409	0.216963
ENSG00000140092	572.203	537.239	13.9158	8.34782	5.66198	8.31391e-19	4.4206e-17	FBLN5	14	91869412	91947987	-	4973	protein_coding	fibulin 5 [Source:HGNC Symbol;Acc:HGNC:3602]	EGF_CA	749	629	10	8	4.24395	3.96602	0.101657	0.0614286
ENSG00000162909	5818.29	5860.09	310.322	249.391	4.38382	8.34881e-19	4.42919e-17	CAPN2	1	223701593	223776018	+	8792	protein_coding	calpain 2 [Source:HGNC Symbol;Acc:HGNC:1479]	Peptidase_C2	7616	6861	223	239	24.4088	24.4693	1.28224	1.03803
ENSG00000128805	583.663	514.178	9.74105	2.08696	6.6151	1.01254e-18	5.33575e-17	ARHGAP22	10	48446034	48656265	-	6783	protein_coding	Rho GTPase activating protein 22 [Source:HGNC Symbol;Acc:HGNC:30320]	PH	764	602	7	2	3.17379	2.7829	0.0521711	0.0112592
ENSG00000073792	1893.08	1946.53	91.8442	59.4782	4.67027	1.0347e-18	5.44037e-17	IGF2BP2	3	185643739	185825056	-	4735	protein_coding	insulin like growth factor 2 mRNA binding protein 2 [Source:HGNC Symbol;Acc:HGNC:28867]	KH_1	2478	2279	66	57	14.7465	15.092	0.704657	0.459678
ENSG00000121297	590.538	597.027	13.9158	15.6522	5.32321	1.05908e-18	5.55615e-17	TSHZ3	19	31274945	31349547	-	5817	protein_coding	teashirt zinc finger homeobox 3 [Source:HGNC Symbol;Acc:HGNC:30700]	-	773	699	10	15	3.74444	3.76791	0.086907	0.0984671
ENSG00000183853	2653.98	2535.02	0	0	13.5148	1.33243e-18	6.94393e-17	KIRREL1	1	157993273	158100262	+	7872	protein_coding	kirre like nephrin family adhesion molecule 1 [Source:HGNC Symbol;Acc:HGNC:15734]	-	3474	2968	0	0	12.4352	11.8223	0	0
ENSG00000008311	1119.96	1202.6	29.2232	49.0435	4.88131	1.50204e-18	7.79345e-17	AASS	7	122075647	122144280	-	4591	protein_coding	aminoadipate-semialdehyde synthase [Source:HGNC Symbol;Acc:HGNC:17366]	Saccharop_dh	1466	1408	21	47	8.99773	9.61652	0.231241	0.390921
ENSG00000112276	657.003	586.778	15.3074	17.7391	5.22875	1.54449e-18	7.99613e-17	BVES	6	105096822	105137174	-	5808	protein_coding	blood vessel epicardial substance [Source:HGNC Symbol;Acc:HGNC:1152]	-	860	687	11	17	4.17233	3.70896	0.0957458	0.111769
ENSG00000136425	662.35	692.689	20.8737	8.34782	5.56748	1.66583e-18	8.60546e-17	CIB2	15	78104606	78131544	-	2146	protein_coding	calcium and integrin binding family member 2 [Source:HGNC Symbol;Acc:HGNC:24579]	-	867	811	15	8	11.384	11.8499	0.353358	0.142351
ENSG00000052850	867.855	860.949	26.44	7.30435	5.71541	1.72364e-18	8.88464e-17	ALX4	11	44260444	44310166	-	5750	protein_coding	ALX homeobox 4 [Source:HGNC Symbol;Acc:HGNC:450]	Homeobox	1136	1008	19	7	5.56694	5.49687	0.167047	0.0464867
ENSG00000019549	2562.31	2692.18	119.676	130.435	4.39222	2.00579e-18	1.02309e-16	SNAI2	8	48917604	48921740	-	2485	protein_coding	snail family transcriptional repressor 2 [Source:HGNC Symbol;Acc:HGNC:11094]	zf-C2H2	3354	3152	86	125	38.0315	39.7725	1.74955	1.9208
ENSG00000164687	1105.45	1106.94	2.78316	26.0869	6.2128	2.57748e-18	1.30298e-16	FABP5	8	81280363	81284777	+	2077	protein_coding	fatty acid binding protein 5 [Source:HGNC Symbol;Acc:HGNC:3560]	-	1447	1296	2	25	19.6308	19.5655	0.0486796	0.459624
ENSG00000130830	1256.71	1220.53	1.39158	1.04348	10.0169	2.65971e-18	1.33882e-16	MPP1	X	154778684	154821007	-	5396	protein_coding	membrane palmitoylated protein 1 [Source:HGNC Symbol;Acc:HGNC:7219]	PDZ	1645	1429	1	1	8.59014	8.30391	0.00936875	0.00707664
ENSG00000158966	1867.11	1879.91	90.4526	50.0869	4.74356	2.69709e-18	1.35474e-16	CACHD1	1	64470792	64693058	+	6345	protein_coding	cache domain containing 1 [Source:HGNC Symbol;Acc:HGNC:29314]	-	2444	2201	65	48	10.8537	10.877	0.517888	0.288874
ENSG00000271601	1489.72	1581.82	22.2653	61.5652	5.18042	4.07882e-18	2.02296e-16	LIX1L	1	145933423	145958001	-	3975	protein_coding	limb and CNS expressed 1 like [Source:HGNC Symbol;Acc:HGNC:28715]	-	1950	1852	16	59	13.8231	14.6092	0.203487	0.566779
ENSG00000221867	2234.57	2304.41	0	0	13.3217	4.13651e-18	2.04298e-16	MAGEA3	X	152698752	152702347	+	1788	protein_coding	MAGE family member A3 [Source:HGNC Symbol;Acc:HGNC:6801]	MAGE	2925	2698	0	0	46.0962	47.3148	0	0
ENSG00000171714	743.33	731.124	0	3.13043	8.71817	4.64669e-18	2.27591e-16	ANO5	11	22193176	22283357	+	6900	protein_coding	anoctamin 5 [Source:HGNC Symbol;Acc:HGNC:27337]	-	973	856	0	3	3.97347	3.88998	0	0.0166024
ENSG00000140600	469.069	476.597	5.56632	10.4348	5.85368	5.10262e-18	2.4889e-16	SH3GL3	15	83447228	83618743	+	3363	protein_coding	SH3 domain containing GRB2 like 3, endophilin A3 [Source:HGNC Symbol;Acc:HGNC:10832]	SH3_2	614	558	4	10	5.14456	5.20271	0.0601294	0.113546
ENSG00000144488	683.741	678.169	2.78316	1.04348	8.55501	6.11101e-18	2.95633e-16	ESPNL	2	238100157	238133287	+	5362	protein_coding	espin like [Source:HGNC Symbol;Acc:HGNC:27937]	-	895	794	2	1	4.7033	4.64319	0.0188563	0.00712151
ENSG00000155816	621.861	559.446	15.3074	3.13043	6.06344	1.1748e-17	5.60296e-16	FMN2	1	240014348	240475189	+	9691	protein_coding	formin 2 [Source:HGNC Symbol;Acc:HGNC:14074]	FH2	814	655	11	3	2.3668	2.11931	0.0573823	0.0118209
ENSG00000136630	1993.93	2000.34	0	0	13.1373	1.20544e-17	5.73752e-16	HLX	1	220879400	220885059	+	5660	protein_coding	H2.0 like homeobox [Source:HGNC Symbol;Acc:HGNC:4978]	Homeobox	2610	2342	0	0	12.9936	12.9746	0	0
ENSG00000233429	582.135	556.884	11.1326	18.7826	5.2317	1.47769e-17	6.97706e-16	HOTAIRM1	7	27095647	27100265	+	1496	antisense	HOXA transcript antisense RNA, myeloid-specific 1 [Source:HGNC Symbol;Acc:HGNC:37117]	-	762	652	8	18	14.3526	13.6659	0.270341	0.459452
ENSG00000114450	1617.3	1534.85	18.0905	61.5652	5.28951	1.57775e-17	7.41982e-16	GNB4	3	179396089	179451590	-	7035	protein_coding	G protein subunit beta 4 [Source:HGNC Symbol;Acc:HGNC:20731]	WD40	2117	1797	13	59	8.47936	8.00952	0.0934185	0.320248
ENSG00000140968	505.739	396.31	9.74105	4.17391	6.06382	1.83962e-17	8.63414e-16	IRF8	16	85898803	85922609	+	5162	protein_coding	interferon regulatory factor 8 [Source:HGNC Symbol;Acc:HGNC:5358]	IRF	662	464	7	4	3.61365	2.81853	0.0685541	0.0295897
ENSG00000059804	439.275	410.83	2.78316	7.30435	6.34222	2.00027e-17	9.29573e-16	SLC2A3	12	7919230	7936275	-	6159	protein_coding	solute carrier family 2 member 3 [Source:HGNC Symbol;Acc:HGNC:11007]	Sugar_tr	575	481	2	7	2.63066	2.44882	0.0164162	0.0433997
ENSG00000152192	1904.54	1832.08	0	0	13.0411	2.1038e-17	9.73851e-16	POU4F1	13	78598362	78603560	-	4547	protein_coding	POU class 4 homeobox 1 [Source:HGNC Symbol;Acc:HGNC:9218]	Pou	2493	2145	0	0	15.4491	14.7919	0	0
ENSG00000187955	589.774	532.969	18.0905	7.30435	5.50112	2.12738e-17	9.82842e-16	COL14A1	8	120059780	120372036	+	8647	protein_coding	collagen type XIV alpha 1 chain [Source:HGNC Symbol;Acc:HGNC:2191]	VWA	772	624	13	7	2.5157	2.26278	0.0760032	0.0309123
ENSG00000022267	7126.95	6820.97	425.823	339.13	4.18916	2.183e-17	1.0046e-15	FHL1	X	136146702	136211359	+	5997	protein_coding	four and a half LIM domains 1 [Source:HGNC Symbol;Acc:HGNC:3702]	LIM	9329	7986	306	325	43.8336	41.7559	2.57953	2.06942
ENSG00000183722	497.336	522.719	13.9158	4.17391	5.86994	2.29486e-17	1.05403e-15	LHFPL6	13	39342892	39603528	-	2327	protein_coding	LHFPL tetraspan subfamily member 6 [Source:HGNC Symbol;Acc:HGNC:6586]	-	651	612	10	4	7.88299	8.24665	0.217249	0.0656391
ENSG00000172671	537.061	556.884	13.9158	17.7391	5.10199	2.41321e-17	1.10623e-15	ZFAND4	10	45615501	45672780	-	6232	protein_coding	zinc finger AN1-type containing 4 [Source:HGNC Symbol;Acc:HGNC:23504]	zf-AN1	703	652	10	17	3.17859	3.28052	0.0811197	0.104165
ENSG00000076706	1053.5	1006.15	50.0968	32.3478	4.6511	2.92585e-17	1.33604e-15	MCAM	11	119308529	119321521	-	7422	protein_coding	melanoma cell adhesion molecule [Source:HGNC Symbol;Acc:HGNC:6934]	-	1379	1178	36	31	5.2354	4.97676	0.245208	0.159492
ENSG00000197172	1758.63	1823.54	0	0	12.9802	2.98124e-17	1.35871e-15	MAGEA6	X	152766136	152769747	-	1863	protein_coding	MAGE family member A6 [Source:HGNC Symbol;Acc:HGNC:6804]	MAGE	2302	2135	0	0	34.8176	35.9342	0	0
ENSG00000120068	428.58	443.286	4.17474	2.08696	7.17254	3.40976e-17	1.55101e-15	HOXB8	17	48611377	48614939	-	2051	protein_coding	homeobox B8 [Source:HGNC Symbol;Acc:HGNC:5119]	Homeobox	561	519	3	2	7.70732	7.93459	0.0739451	0.037236
ENSG00000127955	1024.47	1030.92	0	2.08696	9.77232	3.65392e-17	1.65888e-15	GNAI1	7	80133955	80219402	+	4547	protein_coding	G protein subunit alpha i1 [Source:HGNC Symbol;Acc:HGNC:4384]	G-alpha	1341	1207	0	2	8.31018	8.32348	0	0.0167959
ENSG00000114251	1040.51	1091.56	48.7053	48	4.46276	3.85983e-17	1.73899e-15	WNT5A	3	55465715	55490539	-	7397	protein_coding	Wnt family member 5A [Source:HGNC Symbol;Acc:HGNC:12784]	wnt	1362	1278	35	46	5.18833	5.41749	0.239203	0.237466
ENSG00000141404	433.163	492.825	12.5242	10.4348	5.34193	4.1487e-17	1.86557e-15	GNAL	18	11688956	11885685	+	8445	protein_coding	G protein subunit alpha L [Source:HGNC Symbol;Acc:HGNC:4388]	G-alpha	567	577	9	10	1.89186	2.14239	0.0538762	0.0452167
ENSG00000107719	1459.16	1397.33	61.2295	19.8261	5.15564	4.23556e-17	1.8974e-15	PALD1	10	70478821	70568449	+	4555	protein_coding	phosphatase domain containing, paladin 1 [Source:HGNC Symbol;Acc:HGNC:23530]	-	1910	1636	44	19	11.8155	11.2621	0.488335	0.159281
ENSG00000197343	1679.94	1704.82	0	0	12.8984	4.74269e-17	2.11256e-15	ZNF655	7	99558406	99576453	+	8401	protein_coding	zinc finger protein 655 [Source:HGNC Symbol;Acc:HGNC:30899]	zf-C2H2	2199	1996	0	0	7.37566	7.44993	0	0
ENSG00000170899	865.563	874.615	20.8737	39.6522	4.83138	5.25785e-17	2.33762e-15	GSTA4	6	52977948	52995378	-	2175	protein_coding	glutathione S-transferase alpha 4 [Source:HGNC Symbol;Acc:HGNC:4629]	GST_N	1133	1024	15	38	14.6783	14.7626	0.348647	0.667149
ENSG00000144278	883.134	954.048	30.6147	43.8261	4.6179	5.49093e-17	2.43665e-15	GALNT13	2	153871913	154453849	+	6520	protein_coding	polypeptide N-acetylgalactosaminyltransferase 13 [Source:HGNC Symbol;Acc:HGNC:23242]	Glycos_transf_2	1156	1117	22	42	4.99593	5.3719	0.17058	0.24598
ENSG00000106006	388.854	405.705	8.34947	4.17391	6.02717	7.05543e-17	3.07883e-15	HOXA6	7	27145396	27150603	-	1285	protein_coding	homeobox A6 [Source:HGNC Symbol;Acc:HGNC:5107]	-	509	475	6	4	11.1615	11.5908	0.236049	0.118865
ENSG00000136231	1558.47	1650.15	0	0	12.8213	7.3896e-17	3.2187e-15	IGF2BP3	7	23310209	23470467	-	8511	protein_coding	insulin like growth factor 2 mRNA binding protein 3 [Source:HGNC Symbol;Acc:HGNC:28868]	KH_1	2040	1932	0	0	6.75392	7.11785	0	0
ENSG00000165655	7917.65	8353.26	514.884	312	4.29962	7.42142e-17	3.22661e-15	ZNF503	10	75397830	75401906	-	3347	protein_coding	zinc finger protein 503 [Source:HGNC Symbol;Acc:HGNC:23589]	-	10364	9780	370	299	87.2525	91.6233	5.58856	3.41126
ENSG00000234745	1639.45	1470.79	0	0	12.7764	9.68113e-17	4.14795e-15	HLA-B	6	31269491	31357188	-	3051	protein_coding	major histocompatibility complex, class I, B [Source:HGNC Symbol;Acc:HGNC:4932]	-	2146	1722	0	0	19.8196	17.6976	0	0
ENSG00000075340	1534.79	1549.37	0	0	12.7643	1.01398e-16	4.3366e-15	ADD2	2	70607618	70768225	-	12673	protein_coding	adducin 2 [Source:HGNC Symbol;Acc:HGNC:244]	Aldolase_II	2009	1814	0	0	4.46691	4.48829	0	0
ENSG00000182013	1538.61	1516.91	0	0	12.7508	1.09414e-16	4.66252e-15	PNMA8A	19	46466491	46471563	-	3696	protein_coding	PNMA family member 8A [Source:HGNC Symbol;Acc:HGNC:25578]	-	2014	1776	0	0	15.3544	15.0672	0	0
ENSG00000184185	454.554	526.99	12.5242	2.08696	6.14517	1.22564e-16	5.21348e-15	KCNJ12	17	21376197	21419872	+	5617	protein_coding	potassium voltage-gated channel subfamily J member 12 [Source:HGNC Symbol;Acc:HGNC:6258]	-	595	617	9	2	2.98483	3.44432	0.0810013	0.0135964
ENSG00000176597	507.267	517.595	5.56632	16.6956	5.4838	1.40195e-16	5.95272e-15	B3GNT5	3	183253244	183298504	+	8140	protein_coding	UDP-GlcNAc:betaGal beta-1,3-N-acetylglucosaminyltransferase 5 [Source:HGNC Symbol;Acc:HGNC:15684]	-	664	606	4	16	2.29853	2.33438	0.0248422	0.0750576
ENSG00000150471	472.889	459.515	4.17474	13.5652	5.66715	1.45995e-16	6.17681e-15	ADGRL3	4	61201258	62078335	+	13991	protein_coding	adhesion G protein-coupled receptor L3 [Source:HGNC Symbol;Acc:HGNC:20974]	7tm_2	619	538	3	13	1.24666	1.20575	0.0108399	0.0354808
ENSG00000181104	1315.53	1275.2	47.3137	73.0435	4.422	1.91713e-16	7.96825e-15	F2R	5	76716043	76735781	+	4066	protein_coding	coagulation factor II thrombin receptor [Source:HGNC Symbol;Acc:HGNC:3537]	7tm_1	1722	1493	34	70	11.9336	11.5137	0.422732	0.6574
ENSG00000148798	1400.33	1440.04	0	0	12.6455	1.97946e-16	8.19843e-15	INA	10	103277163	103290351	+	3231	protein_coding	internexin neuronal intermediate filament protein alpha [Source:HGNC Symbol;Acc:HGNC:6057]	Filament	1833	1686	0	0	15.9857	16.3623	0	0
ENSG00000183072	1401.86	1434.06	0	0	12.6432	2.00368e-16	8.26974e-15	NKX2-5	5	173232109	173235357	-	2094	protein_coding	NK2 homeobox 5 [Source:HGNC Symbol;Acc:HGNC:2488]	Homeobox	1835	1679	0	0	24.6925	25.1418	0	0
ENSG00000122591	2162	2157.5	25.0484	93.913	5.17025	2.18237e-16	8.9915e-15	FAM126A	7	22889371	23014130	-	14499	protein_coding	family with sequence similarity 126 member A [Source:HGNC Symbol;Acc:HGNC:24587]	-	2830	2526	18	90	5.4999	5.46283	0.0627608	0.23703
ENSG00000153976	494.28	487.701	18.0905	10.4348	5.12636	2.23269e-16	9.18283e-15	HS3ST3A1	17	13495689	13601927	-	2628	protein_coding	heparan sulfate-glucosamine 3-sulfotransferase 3A1 [Source:HGNC Symbol;Acc:HGNC:5196]	Sulfotransfer_1	647	571	13	10	6.93722	6.81292	0.250076	0.145303
ENSG00000235961	489.696	533.823	19.4821	10.4348	5.11919	2.35867e-16	9.66725e-15	PNMA6A	X	153072482	153075018	+	2209	protein_coding	PNMA family member 6A [Source:HGNC Symbol;Acc:HGNC:28248]	-	641	625	14	10	8.17652	8.8717	0.320395	0.172863
ENSG00000212719	1369.01	1317.9	0	0	12.5653	3.10033e-16	1.2576e-14	C17orf51	17	21524790	21574458	-	8760	protein_coding	chromosome 17 open reading frame 51 [Source:HGNC Symbol;Acc:HGNC:27904]	-	1792	1543	0	0	5.76422	5.52312	0	0
ENSG00000167549	510.323	409.122	13.9158	4.17391	5.71932	3.11305e-16	1.2606e-14	CORO6	17	29614756	29622907	-	4321	protein_coding	coronin 6 [Source:HGNC Symbol;Acc:HGNC:21356]	-	668	479	10	4	4.35611	3.47595	0.116996	0.0353488
ENSG00000079819	5908.44	5917.32	256.051	398.609	4.17373	3.12316e-16	1.26226e-14	EPB41L2	6	130839347	131063322	-	10320	protein_coding	erythrocyte membrane protein band 4.1 like 2 [Source:HGNC Symbol;Acc:HGNC:3379]	Band_41	7734	6928	184	382	21.1169	21.0499	0.901347	1.41346
ENSG00000055732	697.492	711.479	22.2653	33.3913	4.65186	3.14675e-16	1.26772e-14	MCOLN3	1	85018082	85048499	-	6623	protein_coding	mucolipin 3 [Source:HGNC Symbol;Acc:HGNC:13358]	-	913	833	16	32	3.88439	3.94378	0.122129	0.184499
ENSG00000163710	856.395	901.947	41.7474	41.7391	4.39652	3.21933e-16	1.29255e-14	PCOLCE2	3	142815922	142889203	-	3480	protein_coding	procollagen C-endopeptidase enhancer 2 [Source:HGNC Symbol;Acc:HGNC:8739]	CUB	1121	1056	30	40	9.0768	9.51497	0.435809	0.438914
ENSG00000135457	1298.73	1364.88	0	0	12.5528	3.3316e-16	1.33309e-14	TFCP2	12	51093663	51173134	-	3827	protein_coding	transcription factor CP2 [Source:HGNC Symbol;Acc:HGNC:11748]	CP2	1700	1598	0	0	12.5169	13.0931	0	0
ENSG00000037280	2396.53	2513.66	146.116	69.913	4.51188	3.53623e-16	1.41258e-14	FLT4	5	180601506	180649624	-	8852	protein_coding	fms related tyrosine kinase 4 [Source:HGNC Symbol;Acc:HGNC:3767]	Pkinase_Tyr	3137	2943	105	67	9.98572	10.4249	0.599655	0.289023
ENSG00000165152	1346.09	1292.28	0	0	12.539	3.59052e-16	1.43184e-14	TMEM246	9	101473171	101533537	-	5568	protein_coding	transmembrane protein 246 [Source:HGNC Symbol;Acc:HGNC:28180]	-	1762	1513	0	0	8.91688	8.52045	0	0
ENSG00000101680	1348.38	1279.47	0	0	12.5333	3.71484e-16	1.47892e-14	LAMA1	18	6941744	7117814	-	15872	protein_coding	laminin subunit alpha 1 [Source:HGNC Symbol;Acc:HGNC:6481]	Laminin_EGF	1765	1498	0	0	3.13343	2.95939	0	0
ENSG00000128710	1292.61	1321.32	0	0	12.5256	3.86053e-16	1.53376e-14	HOXD10	2	176108790	176119942	+	2692	protein_coding	homeobox D10 [Source:HGNC Symbol;Acc:HGNC:5133]	Homeobox	1692	1547	0	0	17.7105	18.0193	0	0
ENSG00000103449	1353.73	1262.38	0	0	12.5268	3.86557e-16	1.53376e-14	SALL1	16	51135975	51151367	-	5660	protein_coding	spalt like transcription factor 1 [Source:HGNC Symbol;Acc:HGNC:10524]	-	1772	1478	0	0	8.82173	8.18805	0	0
ENSG00000270069	562.272	509.908	1.39158	14.6087	5.99406	3.92733e-16	1.55565e-14	MIR222HG	X	45745211	45770274	-	2785	lincRNA	MIR222 host gene [Source:HGNC Symbol;Acc:HGNC:49555]	-	736	597	1	14	7.44662	6.72159	0.0181522	0.191956
ENSG00000280322	1411.03	1207.72	0	0	12.5283	3.97771e-16	1.57296e-14	AL035425.4	X	108725886	108726948	-	1063	TEC	-	-	1847	1414	0	0	48.9598	41.7099	0	0
ENSG00000187498	2589.05	2623.85	0	1.04348	12.0911	4.33535e-16	1.71152e-14	COL4A1	13	110148963	110307149	-	8188	protein_coding	collagen type IV alpha 1 chain [Source:HGNC Symbol;Acc:HGNC:2202]	Collagen	3389	3072	0	1	11.6627	11.7643	0	0.0046636
ENSG00000184368	483.584	528.698	16.6989	18.7826	4.8303	5.10604e-16	2.00571e-14	MAP7D2	X	20006713	20116917	-	4376	protein_coding	MAP7 domain containing 2 [Source:HGNC Symbol;Acc:HGNC:25899]	-	633	619	12	18	4.07599	4.43543	0.13863	0.15707
ENSG00000182534	2067.27	1905.53	65.4042	122.087	4.39984	5.87498e-16	2.28495e-14	MXRA7	17	76672551	76711016	-	9257	protein_coding	matrix remodeling associated 7 [Source:HGNC Symbol;Acc:HGNC:7541]	-	2706	2231	47	117	8.2369	7.55704	0.256674	0.48263
ENSG00000136010	653.183	680.731	25.0484	31.3043	4.55935	5.9004e-16	2.29106e-14	ALDH1L2	12	105019784	105084577	-	8507	protein_coding	aldehyde dehydrogenase 1 family member L2 [Source:HGNC Symbol;Acc:HGNC:26777]	Aldedh	855	797	18	30	2.83202	2.93768	0.106967	0.134662
ENSG00000130224	1204	1263.24	0	0	12.4423	6.14699e-16	2.37899e-14	LRCH2	X	115110616	115234072	-	4929	protein_coding	leucine rich repeats and calponin homology domain containing 2 [Source:HGNC Symbol;Acc:HGNC:29292]	CH	1576	1479	0	0	9.00956	9.40875	0	0
ENSG00000069702	983.976	940.382	51.4884	45.913	4.30629	6.41795e-16	2.4717e-14	TGFBR3	1	91680343	91906335	-	8705	protein_coding	transforming growth factor beta receptor 3 [Source:HGNC Symbol;Acc:HGNC:11774]	Zona_pellucida	1288	1101	37	44	4.16921	3.96589	0.214875	0.193011
ENSG00000234456	1153.57	1167.58	0	0	12.3542	9.94872e-16	3.76997e-14	MAGI2-AS3	7	79452877	79471208	+	11625	processed_transcript	MAGI2 antisense RNA 3 [Source:HGNC Symbol;Acc:HGNC:40862]	-	1510	1367	0	0	3.66008	3.68721	0	0
ENSG00000134762	2294.16	2386.4	0	1.04348	11.9357	1.03951e-15	3.914e-14	DSC3	18	30990008	31042815	-	7056	protein_coding	desmocollin 3 [Source:HGNC Symbol;Acc:HGNC:3037]	Cadherin	3003	2794	0	1	11.9923	12.4162	0	0.00541178
ENSG00000164099	413.3	349.334	11.1326	8.34782	5.30467	1.09929e-15	4.1259e-14	PRSS12	4	118280038	118353003	-	5725	protein_coding	serine protease 12 [Source:HGNC Symbol;Acc:HGNC:9477]	Trypsin	541	409	8	8	2.66274	2.24012	0.0706428	0.0533597
ENSG00000179331	346.836	362.145	4.17474	2.08696	6.87365	1.10534e-15	4.14205e-14	RAB39A	11	107928503	107963482	+	1830	protein_coding	RAB39A, member RAS oncogene family [Source:HGNC Symbol;Acc:HGNC:16521]	Ras	454	424	3	2	6.99055	7.26503	0.0828751	0.0417328
ENSG00000204789	442.331	439.016	4.17474	14.6087	5.5034	1.20351e-15	4.48148e-14	ZNF204P	6	27357825	27360221	-	2397	processed_pseudogene	zinc finger protein 204, pseudogene [Source:HGNC Symbol;Acc:HGNC:12995]	zf-C2H2	579	514	3	14	6.80639	6.72384	0.0632713	0.223028
ENSG00000108511	542.409	590.195	26.44	17.7391	4.69185	1.34177e-15	4.98057e-14	HOXB6	17	48595751	48604992	-	2604	protein_coding	homeobox B6 [Source:HGNC Symbol;Acc:HGNC:5117]	Homeobox	710	691	19	17	7.68288	8.3207	0.368864	0.249291
ENSG00000161940	443.095	480.868	1.39158	2.08696	8.01962	1.35323e-15	5.01524e-14	BCL6B	17	7023020	7030290	+	4373	protein_coding	B cell CLL/lymphoma 6B [Source:HGNC Symbol;Acc:HGNC:1002]	BTB	580	563	1	2	3.73727	4.03693	0.0115604	0.0174642
ENSG00000227372	1114.61	1115.48	0	0	12.2965	1.36542e-15	5.05246e-14	TP73-AS1	1	3735601	3747336	-	7209	transcribed_unitary_pseudogene	TP73 antisense RNA 1 [Source:HGNC Symbol;Acc:HGNC:29052]	-	1459	1306	0	0	5.70278	5.68055	0	0
ENSG00000196376	504.975	453.536	4.17474	0	8.01935	1.42201e-15	5.24544e-14	SLC35F1	6	117907526	118317676	+	4855	protein_coding	solute carrier family 35 member F1 [Source:HGNC Symbol;Acc:HGNC:21483]	-	661	531	3	0	3.83635	3.42948	0.0312382	0
ENSG00000165556	1144.41	1074.48	0	0	12.2892	1.43074e-15	5.26941e-14	CDX2	13	27962137	27971139	-	4122	protein_coding	caudal type homeobox 2 [Source:HGNC Symbol;Acc:HGNC:1806]	Caudal_act	1498	1258	0	0	10.2402	9.56963	0	0
ENSG00000010810	2158.18	2144.69	136.375	134.609	3.98912	1.70825e-15	6.24277e-14	FYN	6	111660332	111873452	-	7411	protein_coding	FYN proto-oncogene, Src family tyrosine kinase [Source:HGNC Symbol;Acc:HGNC:4037]	Pkinase_Tyr	2825	2511	98	129	10.7411	10.6241	0.668502	0.664679
ENSG00000215612	1107.74	1057.4	0	0	12.2539	1.73066e-15	6.3149e-14	HMX1	4	8846076	8871817	-	2144	protein_coding	H6 family homeobox 1 [Source:HGNC Symbol;Acc:HGNC:5017]	-	1450	1238	0	0	19.0568	18.1058	0	0
ENSG00000072840	1133.71	1012.98	0	0	12.2415	1.88536e-15	6.84763e-14	EVC	4	5711197	5814305	+	7148	protein_coding	EvC ciliary complex subunit 1 [Source:HGNC Symbol;Acc:HGNC:3497]	-	1484	1186	0	0	5.85	5.20263	0	0
ENSG00000023171	388.09	368.978	11.1326	3.13043	5.79122	1.96904e-15	7.12961e-14	GRAMD1B	11	123358428	123627774	+	14863	protein_coding	GRAM domain containing 1B [Source:HGNC Symbol;Acc:HGNC:29214]	GRAM	508	432	8	3	0.963083	0.911381	0.0272105	0.0077075
ENSG00000157214	333.849	369.832	1.39158	7.30435	6.25484	2.0501e-15	7.40041e-14	STEAP2	7	90167590	90238137	+	8715	protein_coding	STEAP2 metalloreductase [Source:HGNC Symbol;Acc:HGNC:17885]	F420_oxidored	437	433	1	7	1.41293	1.55791	0.00580078	0.0306711
ENSG00000016082	378.158	370.687	1.39158	3.13043	7.31161	2.10049e-15	7.56067e-14	ISL1	5	51383391	51394738	+	2882	protein_coding	ISL LIM homeobox 1 [Source:HGNC Symbol;Acc:HGNC:6132]	Homeobox	495	434	1	3	4.83969	4.72192	0.0175412	0.039749
ENSG00000158270	640.96	660.232	6.95789	27.1304	5.2197	2.1009e-15	7.56067e-14	COLEC12	18	316740	500722	-	7340	protein_coding	collectin subfamily member 12 [Source:HGNC Symbol;Acc:HGNC:16016]	Lectin_C	839	773	5	26	3.22086	3.30222	0.0344372	0.135262
ENSG00000244300	550.813	521.011	19.4821	24	4.61726	2.24197e-15	8.05608e-14	GATA2-AS1	3	128489212	128502348	+	2283	antisense	GATA2 antisense RNA 1 [Source:HGNC Symbol;Acc:HGNC:51108]	-	721	610	14	23	8.89889	8.37812	0.31001	0.384699
ENSG00000102755	453.026	465.494	0	3.13043	8.03702	2.73831e-15	9.8097e-14	FLT1	13	28300344	28495145	-	12567	protein_coding	fms related tyrosine kinase 1 [Source:HGNC Symbol;Acc:HGNC:3763]	Pkinase_Tyr	593	545	0	3	1.32963	1.35984	0	0.00911567
ENSG00000198885	988.56	1048	0	0	12.1655	2.80646e-15	1.00386e-13	ITPRIPL1	2	96325331	96330517	+	4652	protein_coding	ITPRIP like 1 [Source:HGNC Symbol;Acc:HGNC:29371]	-	1294	1227	0	0	7.83792	8.27042	0	0
ENSG00000077092	335.377	335.668	1.39158	6.26087	6.3718	2.97919e-15	1.06403e-13	RARB	3	25174332	25597932	+	3697	protein_coding	retinoic acid receptor beta [Source:HGNC Symbol;Acc:HGNC:9865]	zf-C4	439	393	1	6	3.34597	3.33323	0.0136743	0.0619727
ENSG00000182568	326.209	311.753	2.78316	4.17391	6.49074	3.08505e-15	1.09852e-13	SATB1	3	18345387	18445588	-	13409	protein_coding	SATB homeobox 1 [Source:HGNC Symbol;Acc:HGNC:10541]	CUT	427	365	2	4	0.8973	0.853531	0.00754028	0.011391
ENSG00000100979	1486.66	1455.41	80.7116	27.1304	4.78232	3.10785e-15	1.10497e-13	PLTP	20	45898621	45912155	-	2541	protein_coding	phospholipid transfer protein [Source:HGNC Symbol;Acc:HGNC:9093]	-	1946	1704	58	26	21.5797	21.0275	1.15392	0.390722
ENSG00000179456	1845.72	1797.06	115.501	115.826	3.97701	3.29229e-15	1.16354e-13	ZBTB18	1	244048939	244057476	+	3906	protein_coding	zinc finger and BTB domain containing 18 [Source:HGNC Symbol;Acc:HGNC:13030]	BTB	2416	2104	83	111	17.4289	16.8903	1.07424	1.08515
ENSG00000079739	3153.61	3053.47	224.044	182.609	3.93307	3.39252e-15	1.19717e-13	PGM1	1	63593276	63660245	+	4090	protein_coding	phosphoglucomutase 1 [Source:HGNC Symbol;Acc:HGNC:8905]	PGM_PMM_III	4128	3575	161	175	28.4396	27.4079	1.99001	1.63386
ENSG00000078399	1973.3	2050.73	0	1.04348	11.7177	3.47381e-15	1.22402e-13	HOXA9	7	27162435	27175180	-	3029	protein_coding	homeobox A9 [Source:HGNC Symbol;Acc:HGNC:5109]	-	2583	2401	0	1	24.0288	24.8551	0	0.0126066
ENSG00000137273	945.778	934.403	0	0	12.0503	5.2086e-15	1.79773e-13	FOXF2	6	1389576	1395603	+	2451	protein_coding	forkhead box F2 [Source:HGNC Symbol;Acc:HGNC:3810]	Fork_head	1238	1094	0	0	14.2326	13.9958	0	0
ENSG00000244486	1321.64	1294.84	87.6695	51.1304	4.24293	5.79133e-15	1.99013e-13	SCARF2	22	20424815	20437826	-	3341	protein_coding	scavenger receptor class F member 2 [Source:HGNC Symbol;Acc:HGNC:19869]	-	1730	1516	63	49	14.5907	14.228	0.953274	0.560039
ENSG00000131409	464.486	421.079	16.6989	4.17391	5.4586	5.80835e-15	1.99307e-13	LRRC4B	19	50516892	50568045	-	3121	protein_coding	leucine rich repeat containing 4B [Source:HGNC Symbol;Acc:HGNC:25042]	I-set	608	493	12	4	5.48929	4.95308	0.194375	0.0489401
ENSG00000148468	1900.72	1884.18	123.851	53.2174	4.42489	8.00512e-15	2.71921e-13	FAM171A1	10	15211643	15371062	-	3955	protein_coding	family with sequence similarity 171 member A1 [Source:HGNC Symbol;Acc:HGNC:23522]	-	2488	2206	89	51	17.726	17.4897	1.13762	0.492405
ENSG00000175352	617.277	638.025	0	2.08696	9.06188	8.13936e-15	2.76083e-13	NRIP3	11	8980576	9004049	-	4123	protein_coding	nuclear receptor interacting protein 3 [Source:HGNC Symbol;Acc:HGNC:1167]	-	808	747	0	2	5.5221	5.68107	0	0.0185232
ENSG00000158164	480.529	451.828	2.78316	16.6956	5.52363	8.16248e-15	2.7647e-13	TMSB15A	X	102513676	102516784	-	685	protein_coding	thymosin beta 15a [Source:HGNC Symbol;Acc:HGNC:30744]	-	629	529	2	16	25.8742	24.2152	0.147602	0.891925
ENSG00000091656	1745.64	1796.21	1.39158	0	11.5211	9.09275e-15	3.06551e-13	ZFHX4	8	76681219	76867285	+	15687	protein_coding	zinc finger homeobox 4 [Source:HGNC Symbol;Acc:HGNC:30939]	Homeobox	2285	2103	1	0	4.10443	4.20361	0.00322265	0
ENSG00000100505	300.235	283.567	4.17474	5.21739	5.94374	1.07058e-14	3.57991e-13	TRIM9	14	50975262	51096061	-	8945	protein_coding	tripartite motif containing 9 [Source:HGNC Symbol;Acc:HGNC:16288]	SPRY	393	332	3	5	1.23799	1.16381	0.0169549	0.0213446
ENSG00000203778	339.197	329.689	1.39158	3.13043	7.149	1.12003e-14	3.73998e-13	FAM229B	6	112087599	112102790	+	2543	protein_coding	family with sequence similarity 229 member B [Source:HGNC Symbol;Acc:HGNC:33858]	-	444	386	1	3	4.91975	4.75952	0.0198796	0.0450478
ENSG00000072832	339.961	308.336	5.56632	1.04348	6.71868	1.13689e-14	3.78557e-13	CRMP1	4	5748084	5893058	-	5823	protein_coding	collapsin response mediator protein 1 [Source:HGNC Symbol;Acc:HGNC:2365]	Amidohydro_1	445	361	4	1	2.15337	1.94394	0.034727	0.00655771
ENSG00000153898	394.202	372.395	5.56632	14.6087	5.20919	1.20852e-14	4.00711e-13	MCOLN2	1	84925583	84997113	-	3442	protein_coding	mucolipin 2 [Source:HGNC Symbol;Acc:HGNC:13357]	-	516	436	4	14	4.22421	3.9719	0.0587493	0.155316
ENSG00000128713	566.092	647.42	0	2.08696	9.01322	1.22523e-14	4.05684e-13	HOXD11	2	176104216	176109754	+	2110	protein_coding	homeobox D11 [Source:HGNC Symbol;Acc:HGNC:5134]	-	741	758	0	2	9.8956	11.2644	0	0.0361948
ENSG00000149212	1721.96	1756.06	13.9158	77.2174	5.23811	1.2592e-14	4.15765e-13	SESN3	11	95165513	95232541	-	10573	protein_coding	sestrin 3 [Source:HGNC Symbol;Acc:HGNC:23060]	PA26	2254	2056	10	74	6.00706	6.09744	0.047814	0.267259
ENSG00000120820	423.232	443.286	2.78316	15.6522	5.49641	1.26279e-14	4.16368e-13	GLT8D2	12	103988984	104064183	-	3271	protein_coding	glycosyltransferase 8 domain containing 2 [Source:HGNC Symbol;Acc:HGNC:24890]	Glyco_transf_8	554	519	2	15	4.77239	4.97519	0.0309103	0.175109
ENSG00000128268	616.513	500.512	23.6568	5.21739	5.31652	1.31616e-14	4.33359e-13	MGAT3	22	39457344	39492194	+	5457	protein_coding	mannosyl (beta-1,4-)-glycoprotein beta-1,4-N-acetylglucosaminyltransferase [Source:HGNC Symbol;Acc:HGNC:7046]	-	807	586	17	5	4.16702	3.36718	0.157488	0.0349877
ENSG00000183873	427.052	399.727	8.34947	17.7391	4.95851	1.39549e-14	4.58201e-13	SCN5A	3	38548057	38649673	-	10017	protein_coding	sodium voltage-gated channel alpha subunit 5 [Source:HGNC Symbol;Acc:HGNC:10593]	Ion_trans	559	468	6	17	1.57246	1.46498	0.0302808	0.0648052
ENSG00000087258	569.912	546.635	30.6147	19.8261	4.47987	1.44236e-14	4.72935e-13	GNAO1	16	56191347	56357457	+	13697	protein_coding	G protein subunit alpha o1 [Source:HGNC Symbol;Acc:HGNC:4389]	G-alpha	746	640	22	19	1.53469	1.46513	0.081199	0.0529696
ENSG00000170627	813.614	829.347	0	0	11.8557	1.47946e-14	4.84425e-13	GTSF1	12	54455950	54473602	-	2524	protein_coding	gametocyte specific factor 1 [Source:HGNC Symbol;Acc:HGNC:26565]	-	1065	971	0	0	11.8896	12.0629	0	0
ENSG00000153551	563.036	588.486	30.6147	26.0869	4.34805	1.55355e-14	5.0728e-13	CMTM7	3	32391671	32483067	+	3751	protein_coding	CKLF like MARVEL transmembrane domain containing 7 [Source:HGNC Symbol;Acc:HGNC:19178]	-	737	689	22	25	5.53639	5.75963	0.296503	0.254502
ENSG00000189369	838.06	790.912	0	0	11.8434	1.58751e-14	5.17651e-13	GSPT2	X	51743431	51746232	+	2802	protein_coding	G1 to S phase transition 2 [Source:HGNC Symbol;Acc:HGNC:4622]	GTP_EFTU	1097	926	0	0	11.0318	10.3625	0	0
ENSG00000178163	757.845	862.658	0	0	11.8358	1.68892e-14	5.492e-13	ZNF518B	4	10439874	10457410	-	10905	protein_coding	zinc finger protein 518B [Source:HGNC Symbol;Acc:HGNC:29365]	-	992	1010	0	0	2.56326	2.90414	0	0
ENSG00000003400	393.438	379.228	2.78316	13.5652	5.50284	1.71379e-14	5.55759e-13	CASP10	2	201182881	201229406	+	7598	protein_coding	caspase 10 [Source:HGNC Symbol;Acc:HGNC:1500]	Peptidase_C14	515	444	2	13	1.90992	1.83234	0.0133071	0.0653345
ENSG00000164076	343.016	296.378	2.78316	2.08696	7.0594	1.87575e-14	6.07445e-13	CAMKV	3	49857988	49870222	-	3900	protein_coding	CaM kinase like vesicle associated [Source:HGNC Symbol;Acc:HGNC:28788]	Pkinase	449	347	2	2	3.24405	2.78989	0.025925	0.0195823
ENSG00000178662	333.085	322.856	0	6.26087	6.57994	1.90612e-14	6.16433e-13	CSRNP3	2	165469647	165689407	+	12565	protein_coding	cysteine and serine rich nuclear protein 3 [Source:HGNC Symbol;Acc:HGNC:30729]	-	436	378	0	6	0.977756	0.943304	0	0.0182342
ENSG00000112837	794.515	783.225	0	0	11.7973	2.01856e-14	6.48357e-13	TBX18	6	84687351	84764519	-	8469	protein_coding	T-box 18 [Source:HGNC Symbol;Acc:HGNC:11595]	T-box	1040	917	0	0	3.46025	3.39516	0	0
ENSG00000130540	583.663	558.592	0	2.08696	8.926	2.21615e-14	7.09889e-13	SULT4A1	22	43824509	43862503	-	2849	protein_coding	sulfotransferase family 4A member 1 [Source:HGNC Symbol;Acc:HGNC:14903]	Sulfotransfer_1	764	654	0	2	7.55627	7.19793	0	0.0268063
ENSG00000168824	411.009	366.416	0	3.13043	7.79741	2.4772e-14	7.92436e-13	NSG1	4	4348140	4419058	+	4355	protein_coding	neuronal vesicle trafficking associated 1 [Source:HGNC Symbol;Acc:HGNC:18790]	Calcyon	538	429	0	3	3.48097	3.08881	0	0.0263046
ENSG00000117477	310.93	314.315	1.39158	3.13043	7.05182	2.9901e-14	9.47519e-13	CCDC181	1	169394870	169460669	-	3961	protein_coding	coiled-coil domain containing 181 [Source:HGNC Symbol;Acc:HGNC:28051]	-	407	368	1	3	2.89532	2.91317	0.0127629	0.0289211
ENSG00000138795	916.748	867.782	16.6989	51.1304	4.69917	3.06535e-14	9.70063e-13	LEF1	4	108047545	108168956	-	5361	protein_coding	lymphoid enhancer binding factor 1 [Source:HGNC Symbol;Acc:HGNC:6551]	HMG_box	1200	1016	12	49	6.30728	5.94252	0.113159	0.349019
ENSG00000254615	301.763	321.148	8.34947	9.3913	5.12808	3.16057e-14	9.97523e-13	AC027031.2	8	106270144	106272899	+	1419	lincRNA	-	-	395	376	6	9	7.8437	8.3086	0.213758	0.242192
ENSG00000124785	783.055	701.23	0	0	11.7092	3.28015e-14	1.03388e-12	NRN1	6	5997999	6007605	-	2328	protein_coding	neuritin 1 [Source:HGNC Symbol;Acc:HGNC:17972]	-	1025	821	0	0	12.4064	11.0582	0	0
ENSG00000157570	298.707	310.044	9.74105	4.17391	5.49528	3.40938e-14	1.0689e-12	TSPAN18	11	44726465	44932421	+	5871	protein_coding	tetraspanin 18 [Source:HGNC Symbol;Acc:HGNC:20660]	Tetraspannin	391	363	7	4	1.8766	1.93873	0.0602753	0.0260164
ENSG00000115232	734.926	736.248	0	0	11.6964	3.4434e-14	1.07671e-12	ITGA4	2	181457202	181536187	+	7901	protein_coding	integrin subunit alpha 4 [Source:HGNC Symbol;Acc:HGNC:6140]	FG-GAP	962	862	0	0	3.43083	3.42096	0	0
ENSG00000175745	2965.68	3056.88	243.526	150.261	3.93716	3.79188e-14	1.18255e-12	NR2F1	5	93583224	93594615	+	4314	protein_coding	nuclear receptor subfamily 2 group F member 1 [Source:HGNC Symbol;Acc:HGNC:7975]	Hormone_recep	3882	3579	175	144	25.3561	26.0138	2.05074	1.27462
ENSG00000185008	301.763	316.023	4.17474	1.04348	6.98372	4.15419e-14	1.28535e-12	ROBO2	3	75906695	77649964	+	16663	protein_coding	roundabout guidance receptor 2 [Source:HGNC Symbol;Acc:HGNC:10250]	I-set	395	370	3	1	0.66796	0.696259	0.00910168	0.00229164
ENSG00000116678	420.176	459.515	11.1326	21.913	4.71266	4.31745e-14	1.33411e-12	LEPR	1	65420652	65641559	+	11370	protein_coding	leptin receptor [Source:HGNC Symbol;Acc:HGNC:6554]	-	550	538	8	21	1.36304	1.48369	0.0355699	0.0705274
ENSG00000169554	731.106	685.001	0	0	11.6413	4.63263e-14	1.42591e-12	ZEB2	2	144364364	144524583	-	25058	protein_coding	zinc finger E-box binding homeobox 2 [Source:HGNC Symbol;Acc:HGNC:14881]	-	957	802	0	0	1.07615	1.00358	0	0
ENSG00000169851	3697.55	4009.22	308.931	165.913	4.02289	4.71425e-14	1.44914e-12	PCDH7	4	30720415	31146805	+	12249	protein_coding	protocadherin 7 [Source:HGNC Symbol;Acc:HGNC:8659]	Cadherin	4840	4694	222	159	11.134	12.0161	0.916233	0.495673
ENSG00000174099	666.934	641.442	38.9642	35.4783	4.13748	5.33362e-14	1.63315e-12	MSRB3	12	65278643	65491430	+	7405	protein_coding	methionine sulfoxide reductase B3 [Source:HGNC Symbol;Acc:HGNC:27375]	-	873	751	28	34	3.32197	3.18008	0.191155	0.175329
ENSG00000115112	380.45	374.957	12.5242	16.6956	4.68154	5.41392e-14	1.65559e-12	TFCP2L1	2	121216587	121285207	-	9372	protein_coding	transcription factor CP2 like 1 [Source:HGNC Symbol;Acc:HGNC:17925]	CP2	498	439	9	16	1.49728	1.46877	0.0485472	0.0651908
ENSG00000154310	1713.55	1735.56	114.109	131.478	3.81079	5.43473e-14	1.65722e-12	TNIK	3	171061339	171460408	-	8523	protein_coding	TRAF2 and NCK interacting kinase [Source:HGNC Symbol;Acc:HGNC:30765]	Pkinase	2243	2032	82	126	7.41555	7.47573	0.486379	0.564517
ENSG00000174460	306.347	299.795	4.17474	1.04348	6.95622	5.44204e-14	1.65722e-12	ZCCHC12	X	118823790	118826968	+	2231	protein_coding	zinc finger CCHC-type containing 12 [Source:HGNC Symbol;Acc:HGNC:27273]	-	401	351	3	1	5.06467	4.93322	0.0679791	0.0171159
ENSG00000132429	315.514	318.585	1.39158	9.3913	5.79689	5.44731e-14	1.65722e-12	POPDC3	6	105158280	105179995	-	1881	protein_coding	popeye domain containing 3 [Source:HGNC Symbol;Acc:HGNC:17649]	-	413	373	1	9	6.18682	6.21788	0.026876	0.182706
ENSG00000152495	682.977	700.376	0	0	11.6075	5.50212e-14	1.67012e-12	CAMK4	5	111223653	111494886	+	13910	protein_coding	calcium/calmodulin dependent protein kinase IV [Source:HGNC Symbol;Acc:HGNC:1464]	Pkinase	894	820	0	0	1.81099	1.84846	0	0
ENSG00000196636	683.741	699.521	0	0	11.6075	5.50386e-14	1.67012e-12	SDHAF3	7	97116590	97181763	+	2303	protein_coding	succinate dehydrogenase complex assembly factor 3 [Source:HGNC Symbol;Acc:HGNC:21752]	-	895	819	0	0	10.9505	11.151	0	0
ENSG00000091592	294.887	271.609	8.34947	4.17391	5.53797	6.06224e-14	1.83484e-12	NLRP1	17	5499427	5619424	-	12808	protein_coding	NLR family pyrin domain containing 1 [Source:HGNC Symbol;Acc:HGNC:14374]	NACHT	386	318	6	4	0.849205	0.778518	0.0236823	0.0119255
ENSG00000077942	2340	2355.65	169.773	68.8695	4.30389	6.37685e-14	1.92434e-12	FBLN1	22	45502238	45601135	+	7285	protein_coding	fibulin 1 [Source:HGNC Symbol;Acc:HGNC:3600]	EGF_CA	3063	2758	122	66	11.8474	11.871	0.846611	0.34595
ENSG00000145335	488.168	512.47	2.78316	0	8.68101	6.3824e-14	1.92434e-12	SNCA	4	89724099	89838315	-	4014	protein_coding	synuclein alpha [Source:HGNC Symbol;Acc:HGNC:11138]	-	639	600	2	0	4.4857	4.68702	0.0251887	0
ENSG00000105991	517.963	478.305	1.39158	1.04348	8.70247	6.39695e-14	1.92563e-12	HOXA1	7	27092993	27095996	-	2539	protein_coding	homeobox A1 [Source:HGNC Symbol;Acc:HGNC:5099]	Homeobox	678	560	1	1	7.52443	6.91589	0.0199109	0.0150396
novel.11	684.505	671.336	0	0	11.5786	6.40299e-14	1.92563e-12	-	1	221283259	221285207	+	1949	-	-	-	896	786	0	0	12.954	12.6454	0	0
ENSG00000080200	864.799	923.3	9.74105	45.913	4.98137	7.43112e-14	2.21507e-12	CRYBG3	3	97822040	97944963	+	10929	protein_coding	crystallin beta-gamma domain containing 3 [Source:HGNC Symbol;Acc:HGNC:34427]	Crystall	1132	1081	7	44	2.91859	3.10147	0.0323796	0.153734
ENSG00000131711	1866.35	1875.64	132.2	144	3.7594	7.74501e-14	2.30282e-12	MAP1B	5	72107234	72209570	+	12630	protein_coding	microtubule associated protein 1B [Source:HGNC Symbol;Acc:HGNC:6836]	-	2443	2196	95	138	5.45038	5.45195	0.380254	0.417229
ENSG00000160703	1050.44	1147.93	76.5368	33.3913	4.33231	7.77194e-14	2.30792e-12	NLRX1	11	119166568	119184016	+	5320	protein_coding	NLR family member X1 [Source:HGNC Symbol;Acc:HGNC:29890]	NACHT	1375	1344	55	32	7.28278	7.92155	0.522643	0.229687
ENSG00000027869	268.149	306.628	8.34947	7.30435	5.20526	7.83015e-14	2.32229e-12	SH2D2A	1	156806243	156816862	-	2512	protein_coding	SH2 domain containing 2A [Source:HGNC Symbol;Acc:HGNC:10821]	SH2	351	359	6	7	3.93726	4.48123	0.120749	0.106409
ENSG00000106031	460.666	485.992	13.9158	26.0869	4.54656	7.89824e-14	2.33954e-12	HOXA13	7	27193503	27200106	-	5086	protein_coding	homeobox A13 [Source:HGNC Symbol;Acc:HGNC:5102]	Homeobox	603	569	10	25	3.34078	3.50799	0.0993979	0.187699
ENSG00000125895	272.732	284.421	6.95789	7.30435	5.28514	7.9901e-14	2.36379e-12	TMEM74B	20	1180561	1185415	-	2210	protein_coding	transmembrane protein 74B [Source:HGNC Symbol;Acc:HGNC:15893]	-	357	333	5	7	4.55179	4.7247	0.114375	0.12095
ENSG00000143028	244.466	292.108	2.78316	3.13043	6.49482	9.67064e-14	2.83608e-12	SYPL2	1	109466628	109482137	+	3963	protein_coding	synaptophysin like 2 [Source:HGNC Symbol;Acc:HGNC:27638]	-	320	342	2	3	2.27527	2.70598	0.0255129	0.0289065
ENSG00000262655	428.58	413.392	13.9158	21.913	4.54003	9.70893e-14	2.84025e-12	SPON1	11	13962689	14267884	+	5102	protein_coding	spondin 1 [Source:HGNC Symbol;Acc:HGNC:11252]	TSP_1	561	484	10	21	3.09834	2.97459	0.0990862	0.157173
ENSG00000120093	571.439	563.717	13.9158	33.3913	4.56387	9.82808e-14	2.86446e-12	HOXB3	17	48548870	48604912	-	7456	protein_coding	homeobox B3 [Source:HGNC Symbol;Acc:HGNC:5114]	Homeobox	748	660	10	32	2.82685	2.77562	0.0678028	0.163886
ENSG00000112394	882.37	948.923	19.4821	57.3913	4.55804	1.04508e-13	3.04221e-12	SLC16A10	6	111087503	111231194	+	11237	protein_coding	solute carrier family 16 member 10 [Source:HGNC Symbol;Acc:HGNC:17027]	MFS_1	1155	1111	14	55	2.89626	3.10018	0.0629842	0.186901
ENSG00000188517	675.338	594.465	0	0	11.484	1.07517e-13	3.12595e-12	COL25A1	4	108808725	109302752	-	8744	protein_coding	collagen type XXV alpha 1 chain [Source:HGNC Symbol;Acc:HGNC:18603]	Collagen	884	696	0	0	2.84871	2.49587	0	0
ENSG00000129596	479.001	487.701	0	2.08696	8.68569	1.25763e-13	3.63849e-12	CDO1	5	115804733	115816954	-	2189	protein_coding	cysteine dioxygenase type 1 [Source:HGNC Symbol;Acc:HGNC:1795]	-	627	571	0	2	8.07102	8.17924	0	0.0348886
ENSG00000182389	357.532	305.774	0	9.3913	6.03359	1.31384e-13	3.79648e-12	CACNB4	2	151832768	152099475	-	36268	protein_coding	calcium voltage-gated channel auxiliary subunit beta 4 [Source:HGNC Symbol;Acc:HGNC:1404]	-	468	358	0	9	0.363604	0.309515	0	0.00947584
ENSG00000153291	329.265	275.88	0	7.30435	6.25045	1.32461e-13	3.82292e-12	SLC25A27	6	46652915	46678193	+	3288	protein_coding	solute carrier family 25 member 27 [Source:HGNC Symbol;Acc:HGNC:21065]	Mito_carr	431	323	0	7	3.69362	3.0803	0	0.0812952
ENSG00000242498	2016.85	2012.3	129.417	168	3.7582	1.40811e-13	4.04903e-12	ARPIN	15	89895006	89912956	-	8594	protein_coding	actin related protein 2/3 complex inhibitor [Source:HGNC Symbol;Acc:HGNC:28782]	-	2640	2356	93	161	8.65596	8.59612	0.547068	0.715368
ENSG00000171517	589.01	605.569	0	0	11.3959	1.66124e-13	4.72511e-12	LPAR3	1	84811602	84893213	-	3543	protein_coding	lysophosphatidic acid receptor 3 [Source:HGNC Symbol;Acc:HGNC:14298]	7tm_1	771	709	0	0	6.13182	6.27477	0	0
ENSG00000143147	1155.87	1134.27	90.4526	55.3043	3.97943	1.79736e-13	5.10002e-12	GPR161	1	168079543	168137667	-	11224	protein_coding	G protein-coupled receptor 161 [Source:HGNC Symbol;Acc:HGNC:23694]	7tm_1	1513	1328	65	53	3.79837	3.70999	0.292765	0.180313
ENSG00000131435	297.179	227.195	5.56632	2.08696	6.16178	1.86633e-13	5.28302e-12	PDLIM4	5	132257671	132273454	+	3192	protein_coding	PDZ and LIM domain 4 [Source:HGNC Symbol;Acc:HGNC:16501]	PDZ	389	266	4	2	3.43394	2.61301	0.0633506	0.0239258
ENSG00000162614	279.608	269.901	1.39158	3.13043	6.86597	1.91766e-13	5.4218e-12	NEXN	1	77888513	77943895	+	4436	protein_coding	nexilin F-actin binding protein [Source:HGNC Symbol;Acc:HGNC:29557]	I-set	366	316	1	3	2.32486	2.23367	0.0113963	0.0258243
ENSG00000139117	615.749	556.884	0	0	11.3692	1.9343e-13	5.46231e-12	CPNE8	12	38646822	38907430	-	5178	protein_coding	copine 8 [Source:HGNC Symbol;Acc:HGNC:23498]	C2	806	652	0	0	4.38611	3.94828	0	0
ENSG00000102409	3812.91	3832.42	333.979	283.826	3.62991	1.94675e-13	5.48643e-12	BEX4	X	103215092	103217246	+	1328	protein_coding	brain expressed X-linked 4 [Source:HGNC Symbol;Acc:HGNC:25475]	-	4991	4487	240	272	105.9	105.945	9.13623	7.82113
ENSG00000185483	292.595	240.861	1.39158	6.26087	6.04269	1.94749e-13	5.48643e-12	ROR1	1	63774022	64181498	+	6715	protein_coding	receptor tyrosine kinase like orphan receptor 1 [Source:HGNC Symbol;Acc:HGNC:10256]	Pkinase_Tyr	383	282	1	6	1.60716	1.31682	0.00752849	0.0341196
ENSG00000114200	582.135	579.091	0	0	11.355	2.05048e-13	5.76283e-12	BCHE	3	165772904	165837472	-	3082	protein_coding	butyrylcholinesterase [Source:HGNC Symbol;Acc:HGNC:983]	COesterase	762	678	0	0	6.96673	6.89794	0	0
ENSG00000007372	409.481	482.576	1.39158	1.04348	8.54288	2.12684e-13	5.95615e-12	PAX6	11	31784779	31818062	-	20812	protein_coding	paired box 6 [Source:HGNC Symbol;Acc:HGNC:8620]	PAX	536	565	1	1	0.7257	0.85125	0.00242907	0.00183478
ENSG00000162733	340.725	333.96	2.78316	13.5652	5.30797	2.26636e-13	6.33187e-12	DDR2	1	162631373	162787400	+	10730	protein_coding	discoidin domain receptor tyrosine kinase 2 [Source:HGNC Symbol;Acc:HGNC:2731]	Pkinase_Tyr	446	391	2	13	1.17123	1.14261	0.00942289	0.0462639
ENSG00000273274	242.174	274.171	1.39158	5.21739	6.20968	2.27878e-13	6.35153e-12	ZBTB8B	1	32465069	32496686	+	12834	protein_coding	zinc finger and BTB domain containing 8B [Source:HGNC Symbol;Acc:HGNC:37057]	BTB	317	321	1	5	0.695991	0.78427	0.00393905	0.0148767
ENSG00000171757	272.732	242.569	1.39158	5.21739	6.20694	2.33353e-13	6.48119e-12	LRRC34	3	169793428	169812986	-	4851	protein_coding	leucine rich repeat containing 34 [Source:HGNC Symbol;Acc:HGNC:28408]	-	357	284	1	5	2.07369	1.83573	0.0104213	0.0393584
ENSG00000185760	549.285	589.34	0	0	11.3267	2.39173e-13	6.63501e-12	KCNQ5	6	72621792	73198851	+	7570	protein_coding	potassium voltage-gated channel subfamily Q member 5 [Source:HGNC Symbol;Acc:HGNC:6299]	Ion_trans	719	690	0	0	2.67633	2.85809	0	0
ENSG00000121690	351.42	298.087	1.39158	11.4783	5.58076	2.49617e-13	6.91661e-12	DEPDC7	11	33015864	33033582	+	3326	protein_coding	DEP domain containing 7 [Source:HGNC Symbol;Acc:HGNC:29899]	-	460	349	1	11	3.8971	3.29023	0.0151996	0.12629
ENSG00000158301	1980.94	2084.04	114.109	175.304	3.80931	2.53312e-13	7.01077e-12	GPRASP2	X	102712176	102717733	+	3975	protein_coding	G protein-coupled receptor associated sorting protein 2 [Source:HGNC Symbol;Acc:HGNC:25169]	-	2593	2440	82	168	18.3811	19.2475	1.04287	1.61388
ENSG00000135903	445.387	453.536	0	2.08696	8.58105	2.65605e-13	7.3424e-12	PAX3	2	222199888	222298996	-	7939	protein_coding	paired box 3 [Source:HGNC Symbol;Acc:HGNC:8617]	PAX	583	531	0	2	2.06923	2.09726	0	0.00961973
ENSG00000171488	1006.13	1020.67	32.0063	74.0869	4.24507	2.68637e-13	7.41753e-12	LRRC8C	1	89633072	89769903	+	11724	protein_coding	leucine rich repeat containing 8 VRAC subunit C [Source:HGNC Symbol;Acc:HGNC:25075]	-	1317	1195	23	71	3.16531	3.19606	0.0991758	0.23125
ENSG00000130208	268.149	288.691	2.78316	9.3913	5.45732	2.75031e-13	7.58521e-12	APOC1	19	44914247	44919349	+	1231	protein_coding	apolipoprotein C1 [Source:HGNC Symbol;Acc:HGNC:607]	-	351	338	2	9	8.03444	8.60957	0.0821345	0.279179
ENSG00000139910	443.859	438.162	8.34947	24	4.73846	2.75539e-13	7.59034e-12	NOVA1	14	26443093	26597754	-	10046	protein_coding	NOVA alternative splicing regulator 1 [Source:HGNC Symbol;Acc:HGNC:7886]	KH_1	581	513	6	23	1.62963	1.6012	0.0301934	0.0874246
ENSG00000206538	253.634	256.235	4.17474	7.30435	5.44185	2.83008e-13	7.76889e-12	VGLL3	3	86876388	86991119	-	12714	protein_coding	vestigial like family member 3 [Source:HGNC Symbol;Acc:HGNC:24327]	-	332	300	3	7	0.735804	0.739881	0.0119287	0.021024
ENSG00000166402	2879.35	2756.23	247.701	204.522	3.64033	2.90375e-13	7.96187e-12	TUB	11	8019244	8106112	+	6722	protein_coding	tubby bipartite transcription factor [Source:HGNC Symbol;Acc:HGNC:12406]	Tub	3769	3227	178	196	15.7992	15.053	1.33868	1.11341
ENSG00000122691	443.095	420.225	2.78316	0	8.46743	2.98844e-13	8.15621e-12	TWIST1	7	19020991	19117672	-	2033	protein_coding	twist family bHLH transcription factor 1 [Source:HGNC Symbol;Acc:HGNC:12428]	-	580	492	2	0	8.03891	7.5884	0.0497332	0
ENSG00000129675	636.376	588.486	29.2232	41.7391	4.1021	3.0182e-13	8.2219e-12	ARHGEF6	X	136665547	136782088	-	6434	protein_coding	Rac/Cdc42 guanine nucleotide exchange factor 6 [Source:HGNC Symbol;Acc:HGNC:685]	RhoGEF	833	689	21	40	3.64813	3.35785	0.165003	0.237398
ENSG00000119865	543.173	558.592	0	0	11.2792	3.03672e-13	8.25933e-12	CNRIP1	2	68284171	68320051	-	3548	protein_coding	cannabinoid receptor interacting protein 1 [Source:HGNC Symbol;Acc:HGNC:24546]	-	711	654	0	0	5.64667	5.77985	0	0
ENSG00000234147	333.085	303.211	0	3.13043	7.50947	3.04283e-13	8.26641e-12	AL035446.1	6	140845958	140852924	-	453	lincRNA	-	-	436	355	0	3	27.1203	24.5727	0	0.252884
ENSG00000130997	360.587	344.209	18.0905	10.4348	4.6472	3.19436e-13	8.64822e-12	POLN	4	2071918	2242121	-	7721	protein_coding	DNA polymerase nu [Source:HGNC Symbol;Acc:HGNC:18870]	-	472	403	13	10	1.72256	1.63664	0.0851184	0.0494567
ENSG00000183837	553.868	534.677	0	0	11.2618	3.32349e-13	8.96696e-12	PNMA3	X	153056409	153060467	+	3748	protein_coding	PNMA family member 3 [Source:HGNC Symbol;Acc:HGNC:18742]	-	725	626	0	0	5.45061	5.23718	0	0
ENSG00000176165	1139.06	1076.19	0	1.04348	10.8567	3.39729e-13	9.15562e-12	FOXG1	14	28760330	28770277	+	5358	protein_coding	forkhead box G1 [Source:HGNC Symbol;Acc:HGNC:3811]	-	1491	1260	0	1	7.84118	7.37378	0	0.00712683
ENSG00000143195	430.108	418.517	2.78316	0	8.44259	3.55156e-13	9.56046e-12	ILDR2	1	166895711	166975482	-	13884	protein_coding	immunoglobulin like domain containing receptor 2 [Source:HGNC Symbol;Acc:HGNC:18131]	-	563	490	2	0	1.14262	1.10663	0.00728231	0
ENSG00000164294	1620.35	1633.92	38.9642	116.87	4.3755	4.10699e-13	1.10179e-11	GPX8	5	55160118	55167071	+	3868	protein_coding	glutathione peroxidase 8 (putative) [Source:HGNC Symbol;Acc:HGNC:33100]	-	2121	1913	28	112	15.4511	15.5078	0.365953	1.10568
ENSG00000058091	568.384	566.279	25.0484	38.6087	4.14631	4.12954e-13	1.10659e-11	CDK14	7	90466424	91210590	+	6841	protein_coding	cyclin dependent kinase 14 [Source:HGNC Symbol;Acc:HGNC:8883]	Pkinase	744	663	18	37	3.0645	3.0389	0.133017	0.206529
ENSG00000119866	499.628	550.905	0	0	11.2105	4.37801e-13	1.16786e-11	BCL11A	2	60450520	60555154	-	25422	protein_coding	B cell CLL/lymphoma 11A [Source:HGNC Symbol;Acc:HGNC:13221]	-	654	645	0	0	0.724894	0.795559	0	0
ENSG00000204381	515.671	526.136	0	0	11.1985	4.59591e-13	1.22461e-11	LAYN	11	111540280	111561745	+	3144	protein_coding	layilin [Source:HGNC Symbol;Acc:HGNC:29471]	-	675	616	0	0	6.04961	6.14357	0	0
novel.740	264.329	272.463	0	6.26087	6.29264	4.83475e-13	1.28246e-11	-	X	107052053	107058226	-	6174	-	PF17919:RNase H-like domain found in reverse transcriptase|PF00429:ENV polyprotein (coat polyprotein)	-	346	319	0	6	1.57912	1.62012	0	0.0371094
ENSG00000170577	1393.46	1371.71	118.284	91.8261	3.72041	5.53036e-13	1.46205e-11	SIX2	2	45005161	45009430	-	2205	protein_coding	SIX homeobox 2 [Source:HGNC Symbol;Acc:HGNC:10888]	Homeobox	1824	1606	85	88	23.3089	22.8381	1.94879	1.52396
ENSG00000115935	1127.6	1187.22	97.4105	70.9565	3.78457	5.97928e-13	1.57543e-11	WIPF1	2	174559572	174682916	-	9121	protein_coding	WAS/WASL interacting protein family member 1 [Source:HGNC Symbol;Acc:HGNC:12736]	-	1476	1390	70	68	4.55985	4.77854	0.38798	0.284685
ENSG00000179855	515.671	486.846	0	0	11.143	6.12922e-13	1.61314e-11	GIPC3	19	3585553	3593541	+	4348	protein_coding	GIPC PDZ domain containing family member 3 [Source:HGNC Symbol;Acc:HGNC:18183]	PDZ	675	570	0	0	4.37442	4.11063	0	0
ENSG00000138944	414.064	413.392	0	2.08696	8.46184	6.17274e-13	1.62278e-11	SHISAL1	22	44243667	44312851	-	6751	protein_coding	shisa like 1 [Source:HGNC Symbol;Acc:HGNC:29335]	-	542	484	0	2	2.26223	2.24802	0	0.0113126
ENSG00000122870	473.653	525.282	0	0	11.1378	6.3605e-13	1.67029e-11	BICC1	10	58513140	58831437	+	6569	protein_coding	BicC family RNA binding protein 1 [Source:HGNC Symbol;Acc:HGNC:19351]	KH_1	620	615	0	0	2.65949	2.93561	0	0
ENSG00000237149	846.464	870.345	68.1874	51.1304	3.85093	6.54699e-13	1.71544e-11	ZNF503-AS2	10	75401519	75408982	+	3348	antisense	ZNF503 antisense RNA 2 [Source:HGNC Symbol;Acc:HGNC:23525]	-	1108	1019	49	49	9.32526	9.54358	0.739885	0.558868
ENSG00000148408	475.181	416.809	23.6568	5.21739	4.99133	7.44899e-13	1.93887e-11	CACNA1B	9	137877789	138124624	+	9897	protein_coding	calcium voltage-gated channel subunit alpha1 B [Source:HGNC Symbol;Acc:HGNC:1389]	Ion_trans	622	488	17	5	1.7709	1.5461	0.0868358	0.0192915
ENSG00000165633	491.988	480.013	0	0	11.0984	7.66756e-13	1.98827e-11	VSTM4	10	49014245	49115509	-	8633	protein_coding	V-set and transmembrane domain containing 4 [Source:HGNC Symbol;Acc:HGNC:26470]	V-set	644	562	0	0	2.10199	2.04125	0	0
ENSG00000175287	488.168	481.722	0	0	11.0953	7.78669e-13	2.01566e-11	PHYHD1	9	128920895	128942041	+	2915	protein_coding	phytanoyl-CoA dioxygenase domain containing 1 [Source:HGNC Symbol;Acc:HGNC:23396]	PhyH	639	564	0	0	6.17687	6.06685	0	0
ENSG00000162694	1198.65	1244.45	20.8737	80.3478	4.57929	7.79728e-13	2.01619e-11	EXTL2	1	100872372	100895998	-	4834	protein_coding	exostosin like glycosyltransferase 2 [Source:HGNC Symbol;Acc:HGNC:3516]	-	1569	1457	15	77	9.14582	9.45095	0.156869	0.608251
ENSG00000153956	1010.71	953.194	0	1.04348	10.683	8.26642e-13	2.13516e-11	CACNA2D1	7	81946444	82443798	-	9010	protein_coding	calcium voltage-gated channel auxiliary subunit alpha2delta 1 [Source:HGNC Symbol;Acc:HGNC:1399]	VWA	1323	1116	0	1	4.13753	3.88385	0	0.00423813
ENSG00000007237	229.951	274.171	4.17474	1.04348	6.68883	8.53659e-13	2.20253e-11	GAS7	17	9910609	10198551	-	10100	protein_coding	growth arrest specific 7 [Source:HGNC Symbol;Acc:HGNC:4169]	WW	301	321	3	1	0.839753	0.996566	0.015016	0.00378075
ENSG00000175040	461.43	489.409	0	0	11.0666	9.05111e-13	2.33274e-11	CHST2	3	143119331	143124014	+	4582	protein_coding	carbohydrate sulfotransferase 2 [Source:HGNC Symbol;Acc:HGNC:1970]	Sulfotransfer_1	604	573	0	0	3.7144	3.92123	0	0
ENSG00000253250	386.562	379.228	1.39158	1.04348	8.32273	9.49732e-13	2.43709e-11	C8orf88	8	90958637	90985257	-	894	protein_coding	chromosome 8 open reading frame 88 [Source:HGNC Symbol;Acc:HGNC:44672]	-	506	444	1	1	15.9485	15.5728	0.0565479	0.0427131
ENSG00000112541	223.075	231.466	2.78316	5.21739	5.78871	1.01068e-12	2.5787e-11	PDE10A	6	165327287	165986603	-	12348	protein_coding	phosphodiesterase 10A [Source:HGNC Symbol;Acc:HGNC:8772]	-	292	271	2	5	0.666335	0.688169	0.00818817	0.0154622
ENSG00000161249	3432.46	3172.19	314.497	242.087	3.56977	1.01147e-12	2.5787e-11	DMKN	19	35497220	35513658	-	7444	protein_coding	dermokine [Source:HGNC Symbol;Acc:HGNC:25063]	-	4493	3714	226	232	17.0073	15.6444	1.53481	1.19009
ENSG00000154162	454.554	462.077	0	0	11.0138	1.17872e-12	2.98535e-11	CDH12	5	21750673	22853622	-	5928	protein_coding	cadherin 12 [Source:HGNC Symbol;Acc:HGNC:1751]	Cadherin	595	541	0	0	2.82823	2.86162	0	0
ENSG00000159433	715.063	668.773	43.1389	10.4348	4.71609	1.19458e-12	3.01622e-11	STARD9	15	42575659	42720981	+	20706	protein_coding	StAR related lipid transfer domain containing 9 [Source:HGNC Symbol;Acc:HGNC:19162]	Kinesin	936	783	31	10	1.27376	1.18574	0.0756866	0.0184418
ENSG00000149231	950.362	872.053	1.39158	35.4783	5.59051	1.24602e-12	3.1327e-11	CCDC82	11	96352769	96389956	-	17313	protein_coding	coiled-coil domain containing 82 [Source:HGNC Symbol;Acc:HGNC:26282]	-	1244	1021	1	34	2.02467	1.84917	0.00291999	0.0749904
ENSG00000116983	246.758	206.696	2.78316	3.13043	6.25238	1.26705e-12	3.17742e-11	HPCAL4	1	39678648	39691689	-	4962	protein_coding	hippocalcin like 4 [Source:HGNC Symbol;Acc:HGNC:18212]	efhand	323	242	2	3	1.83422	1.52926	0.0203764	0.0230868
ENSG00000163623	452.262	455.244	0	0	10.9994	1.26784e-12	3.17742e-11	NKX6-1	4	84491987	84498450	-	3086	protein_coding	NK6 homeobox 1 [Source:HGNC Symbol;Acc:HGNC:7839]	Homeobox	592	533	0	0	5.40545	5.41569	0	0
ENSG00000257497	254.398	248.548	5.56632	9.3913	5.04552	1.28824e-12	3.22511e-11	AC121761.1	12	75483454	75489820	-	1482	antisense	-	-	333	291	4	9	6.33144	6.15697	0.136447	0.231896
ENSG00000160963	254.398	210.967	1.39158	4.17391	6.31487	1.30489e-12	3.26334e-11	COL26A1	7	101362820	101559024	+	3156	protein_coding	collagen type XXVI alpha 1 chain [Source:HGNC Symbol;Acc:HGNC:18038]	Collagen	333	247	1	4	2.97313	2.45405	0.0160183	0.0483974
ENSG00000138685	463.722	435.599	0	0	10.9863	1.36166e-12	3.39451e-11	FGF2	4	122826708	122898236	+	6775	protein_coding	fibroblast growth factor 2 [Source:HGNC Symbol;Acc:HGNC:3676]	-	607	510	0	0	2.52456	2.36039	0	0
ENSG00000103742	385.034	394.602	23.6568	17.7391	4.24392	1.40343e-12	3.49495e-11	IGDCC4	15	65381464	65423072	-	7764	protein_coding	immunoglobulin superfamily DCC subclass member 4 [Source:HGNC Symbol;Acc:HGNC:13770]	I-set	504	462	17	17	1.82916	1.86586	0.110692	0.0836108
ENSG00000183023	382.742	420.225	13.9158	25.0435	4.34814	1.4657e-12	3.64618e-11	SLC8A1	2	40097270	40611053	-	21922	protein_coding	solute carrier family 8 member A1 [Source:HGNC Symbol;Acc:HGNC:11068]	Na_Ca_ex	501	492	10	24	0.643968	0.703732	0.0230608	0.0418052
ENSG00000018236	427.052	461.223	0	0	10.9684	1.49476e-12	3.70674e-11	CNTN1	12	40692442	41072418	+	7492	protein_coding	contactin 1 [Source:HGNC Symbol;Acc:HGNC:2171]	fn3	559	540	0	0	2.10242	2.26005	0	0
ENSG00000139971	304.055	321.148	5.56632	15.6522	4.84233	1.53256e-12	3.7965e-11	C14orf37	14	57999735	58298139	-	7565	protein_coding	chromosome 14 open reading frame 37 [Source:HGNC Symbol;Acc:HGNC:19846]	-	398	376	4	15	1.48245	1.55848	0.0267304	0.0757149
ENSG00000169760	396.493	478.305	0	0	10.9463	1.74038e-12	4.28883e-11	NLGN1	3	173396284	174286644	+	10148	protein_coding	neuroligin 1 [Source:HGNC Symbol;Acc:HGNC:14291]	COesterase	519	560	0	0	1.4411	1.73033	0	0
ENSG00000166501	450.734	414.247	0	0	10.9302	1.81671e-12	4.47226e-11	PRKCB	16	23835946	24220611	+	11086	protein_coding	protein kinase C beta [Source:HGNC Symbol;Acc:HGNC:9395]	Pkinase	590	485	0	0	1.49963	1.3718	0	0
ENSG00000133134	2669.26	2516.23	250.484	198.261	3.53157	1.92076e-12	4.71366e-11	BEX2	X	103309346	103311046	-	1176	protein_coding	brain expressed X-linked 2 [Source:HGNC Symbol;Acc:HGNC:30933]	-	3494	2946	180	190	83.7186	78.5503	7.73782	6.16943
ENSG00000103241	268.149	252.818	2.78316	1.04348	7.16616	1.96486e-12	4.81187e-11	FOXF1	16	86510527	86515418	+	3516	protein_coding	forkhead box F1 [Source:HGNC Symbol;Acc:HGNC:3809]	Fork_head	351	296	2	1	2.81297	2.63977	0.0287564	0.0108605
ENSG00000156298	446.151	407.414	0	0	10.911	2.00418e-12	4.89293e-11	TSPAN7	X	38561370	38688920	+	3110	protein_coding	tetraspanin 7 [Source:HGNC Symbol;Acc:HGNC:11854]	Tetraspannin	584	477	0	0	5.29126	4.80929	0	0
ENSG00000188848	867.091	868.637	0	1.04348	10.5049	2.02279e-12	4.93326e-11	BEND4	4	42110938	42152878	-	8765	protein_coding	BEN domain containing 4 [Source:HGNC Symbol;Acc:HGNC:23815]	-	1135	1017	0	1	3.6488	3.63824	0	0.00435659
ENSG00000233593	245.23	275.026	8.34947	10.4348	4.78126	2.10063e-12	5.10727e-11	AL590094.1	1	90782983	90851657	-	4212	processed_transcript	-	-	321	322	6	10	2.14745	2.39712	0.0720139	0.0906589
ENSG00000135298	302.527	245.131	0	3.13043	7.29449	2.14971e-12	5.21587e-11	ADGRB3	6	68635367	69389511	+	6490	protein_coding	adhesion G protein-coupled receptor B3 [Source:HGNC Symbol;Acc:HGNC:945]	7tm_2	396	287	0	3	1.71932	1.38663	0	0.0176512
ENSG00000143858	236.827	212.675	6.95789	4.17391	5.36538	2.15331e-12	5.21924e-11	SYT2	1	202590596	202710417	-	7774	protein_coding	synaptotagmin 2 [Source:HGNC Symbol;Acc:HGNC:11510]	C2	310	249	5	4	1.12363	1.00433	0.0325147	0.0196478
ENSG00000145908	436.219	407.414	0	0	10.8941	2.17195e-12	5.24346e-11	ZNF300	5	150894392	150904983	-	4411	protein_coding	zinc finger protein 300 [Source:HGNC Symbol;Acc:HGNC:13091]	zf-C2H2	571	477	0	0	3.64759	3.39081	0	0
ENSG00000003096	1142.88	1152.2	87.6695	99.1304	3.61774	2.2247e-12	5.35378e-11	KLHL13	X	117897813	118117340	-	6983	protein_coding	kelch like family member 13 [Source:HGNC Symbol;Acc:HGNC:22931]	BACK	1496	1349	63	95	6.03665	6.05749	0.456092	0.519494
ENSG00000154548	399.549	440.724	0	0	10.8883	2.25135e-12	5.41241e-11	SRSF12	6	89095959	89118081	-	4548	protein_coding	serine and arginine rich splicing factor 12 [Source:HGNC Symbol;Acc:HGNC:21220]	RRM_1	523	516	0	0	3.24032	3.55756	0	0
ENSG00000184785	411.009	427.058	0	0	10.8845	2.26982e-12	5.45127e-11	SMIM10	X	134990938	134992473	+	1536	protein_coding	small integral membrane protein 10 [Source:HGNC Symbol;Acc:HGNC:41913]	-	538	500	0	0	9.86955	10.2071	0	0
ENSG00000204469	875.494	808.848	1.39158	0	10.4484	2.46554e-12	5.89134e-11	PRRC2A	6	31620720	31637771	+	9115	protein_coding	proline rich coiled-coil 2A [Source:HGNC Symbol;Acc:HGNC:13918]	-	1146	947	1	0	3.5427	3.25774	0.00554622	0
ENSG00000126970	805.21	867.782	1.39158	0	10.4386	2.58699e-12	6.15042e-11	ZC4H2	X	64915802	65034713	-	5173	protein_coding	zinc finger C4H2-type containing [Source:HGNC Symbol;Acc:HGNC:24931]	-	1054	1016	1	0	5.74122	6.15848	0.00977262	0
ENSG00000157510	309.402	247.694	12.5242	3.13043	5.21239	2.60373e-12	6.18399e-11	AFAP1L1	5	149271871	149341802	+	4721	protein_coding	actin filament associated protein 1 like 1 [Source:HGNC Symbol;Acc:HGNC:26714]	PH	405	290	9	3	2.41728	1.92613	0.0963745	0.0242653
ENSG00000203727	405.661	413.392	0	0	10.8514	2.67734e-12	6.35243e-11	SAMD5	6	147508927	147737547	+	6320	protein_coding	sterile alpha motif domain containing 5 [Source:HGNC Symbol;Acc:HGNC:21180]	-	531	484	0	0	2.36747	2.40132	0	0
ENSG00000178573	1417.9	1440.04	129.417	113.739	3.55605	2.70504e-12	6.40528e-11	MAF	16	79585843	79600714	-	6976	protein_coding	MAF bZIP transcription factor [Source:HGNC Symbol;Acc:HGNC:6776]	bZIP_Maf	1856	1686	93	109	7.49683	7.57833	0.673954	0.596649
ENSG00000125816	394.202	419.371	0	0	10.8417	2.82407e-12	6.6604e-11	NKX2-4	20	21395367	21398028	-	2238	protein_coding	NK2 homeobox 4 [Source:HGNC Symbol;Acc:HGNC:7837]	Homeobox	516	491	0	0	6.49675	6.8793	0	0
ENSG00000081181	491.224	492.825	29.2232	34.4348	3.94658	3.03019e-12	7.11808e-11	ARG2	14	67619798	67651720	+	2418	protein_coding	arginase 2 [Source:HGNC Symbol;Acc:HGNC:664]	-	643	577	21	33	7.49309	7.48242	0.439053	0.521142
ENSG00000144451	336.141	369.832	0	2.08696	8.23339	3.10565e-12	7.28085e-11	SPAG16	2	213284379	214410501	+	8257	protein_coding	sperm associated antigen 16 [Source:HGNC Symbol;Acc:HGNC:23225]	WD40	440	433	0	2	1.50154	1.64433	0	0.00924925
ENSG00000166963	868.619	895.114	77.9284	54.2609	3.74258	3.24828e-12	7.5926e-11	MAP1A	15	43510958	43531620	+	10629	protein_coding	microtubule associated protein 1A [Source:HGNC Symbol;Acc:HGNC:6835]	-	1137	1048	56	52	3.01422	3.09166	0.266348	0.186814
ENSG00000110427	336.141	351.896	20.8737	8.34782	4.58775	3.27346e-12	7.6439e-11	KIAA1549L	11	33376466	33674102	+	13012	protein_coding	KIAA1549 like [Source:HGNC Symbol;Acc:HGNC:24836]	-	440	412	15	8	0.952829	0.992832	0.0582775	0.0234771
ENSG00000204536	388.854	401.435	0	0	10.7998	3.4719e-12	8.0833e-11	CCHCR1	6	31142439	31158238	-	5086	protein_coding	coiled-coil alpha-helical rod protein 1 [Source:HGNC Symbol;Acc:HGNC:13930]	-	509	470	0	0	2.81999	2.89764	0	0
ENSG00000184005	400.313	384.352	0	0	10.7896	3.65839e-12	8.50073e-11	ST6GALNAC3	1	76074719	76634601	+	7237	protein_coding	ST6 N-acetylgalactosaminide alpha-2,6-sialyltransferase 3 [Source:HGNC Symbol;Acc:HGNC:19343]	Glyco_transf_29	524	450	0	0	2.04023	1.94974	0	0
ENSG00000125257	1650.91	1651.86	125.242	158.609	3.53886	3.68832e-12	8.56184e-11	ABCC4	13	95019829	95301475	-	8635	protein_coding	ATP binding cassette subfamily C member 4 [Source:HGNC Symbol;Acc:HGNC:55]	ABC_membrane	2161	1934	90	152	7.05178	7.0229	0.526907	0.672171
ENSG00000099139	396.493	386.061	0	0	10.7857	3.72589e-12	8.64054e-11	PCSK5	9	75890644	76362339	+	12705	protein_coding	proprotein convertase subtilisin/kexin type 5 [Source:HGNC Symbol;Acc:HGNC:8747]	Peptidase_S8	519	452	0	0	1.15106	1.11554	0	0
ENSG00000121871	358.296	425.35	0	0	10.7876	3.83408e-12	8.87403e-11	SLITRK3	3	165186720	165197109	-	4892	protein_coding	SLIT and NTRK like family member 3 [Source:HGNC Symbol;Acc:HGNC:23501]	-	469	498	0	0	2.70142	3.19202	0	0
ENSG00000197106	213.144	205.842	4.17474	2.08696	6.11304	4.30934e-12	9.93506e-11	SLC6A17	1	110150486	110202202	+	6644	protein_coding	solute carrier family 6 member 17 [Source:HGNC Symbol;Acc:HGNC:31399]	SNF	279	241	3	2	1.18326	1.13739	0.0228268	0.0114947
ENSG00000145147	5097.12	5470.62	526.017	488.348	3.38117	4.37055e-12	1.00565e-10	SLIT2	4	20253260	20620561	+	9712	protein_coding	slit guidance ligand 2 [Source:HGNC Symbol;Acc:HGNC:11086]	EGF	6672	6405	378	468	19.3577	20.6792	1.9676	1.84008
ENSG00000119630	277.316	319.44	16.6989	9.3913	4.53729	4.37522e-12	1.00575e-10	PGF	14	74941834	74955784	-	5962	protein_coding	placental growth factor [Source:HGNC Symbol;Acc:HGNC:8893]	-	363	374	12	9	1.71562	1.96699	0.101752	0.0576434
ENSG00000166341	253.634	247.694	11.1326	3.13043	5.19394	4.43526e-12	1.01757e-10	DCHS1	11	6621323	6655854	-	10765	protein_coding	dachsous cadherin-related 1 [Source:HGNC Symbol;Acc:HGNC:13681]	Cadherin	332	290	8	3	0.869021	0.844708	0.037569	0.0106416
ENSG00000007171	256.689	259.651	11.1326	2.08696	5.36046	4.51941e-12	1.03587e-10	NOS2	17	27756766	27800499	-	4369	protein_coding	nitric oxide synthase 2 [Source:HGNC Symbol;Acc:HGNC:7873]	NAD_binding_1	336	304	8	2	2.16702	2.1818	0.0925682	0.0174802
ENSG00000198914	369.755	390.331	0	0	10.7436	4.612e-12	1.05606e-10	POU3F3	2	104855511	104858574	+	3064	protein_coding	POU class 3 homeobox 3 [Source:HGNC Symbol;Acc:HGNC:9216]	Pou	484	457	0	0	4.45106	4.67681	0	0
ENSG00000112769	368.227	386.061	0	0	10.7326	4.86933e-12	1.11068e-10	LAMA4	6	112108760	112254939	-	11575	protein_coding	laminin subunit alpha 4 [Source:HGNC Symbol;Acc:HGNC:6484]	Laminin_G_2	482	452	0	0	1.17336	1.22445	0	0
ENSG00000139970	267.385	306.628	15.3074	5.21739	4.84787	5.01484e-12	1.14166e-10	RTN1	14	59595976	59870966	-	6209	protein_coding	reticulon 1 [Source:HGNC Symbol;Acc:HGNC:10467]	-	350	359	11	5	1.58837	1.81299	0.0895622	0.0307501
ENSG00000182742	230.715	222.07	8.34947	2.08696	5.51168	5.35227e-12	1.21731e-10	HOXB4	17	48575513	48580111	-	3757	protein_coding	homeobox B4 [Source:HGNC Symbol;Acc:HGNC:5115]	Homeobox	302	260	6	2	2.26502	2.16998	0.0807354	0.0203277
ENSG00000233608	349.892	389.477	0	0	10.7037	5.68992e-12	1.29037e-10	TWIST2	2	238848032	238910543	+	1878	protein_coding	twist family bHLH transcription factor 2 [Source:HGNC Symbol;Acc:HGNC:20670]	HLH	458	456	0	0	6.87189	7.61363	0	0
ENSG00000046889	392.674	339.084	0	0	10.6889	6.2039e-12	1.40021e-10	PREX2	8	67952118	68237030	+	12058	protein_coding	phosphatidylinositol-3,4,5-trisphosphate dependent Rac exchange factor 2 [Source:HGNC Symbol;Acc:HGNC:22950]	RhoGEF	514	397	0	0	1.20114	1.03238	0	0
ENSG00000198093	240.646	255.381	0	3.13043	7.15174	6.25734e-12	1.41092e-10	ZNF649	19	51889224	51905040	-	4365	protein_coding	zinc finger protein 649 [Source:HGNC Symbol;Acc:HGNC:25741]	KRAB	315	299	0	3	2.03345	2.14788	0	0.0262444
ENSG00000278041	719.647	737.103	0	1.04348	10.2522	7.1107e-12	1.59724e-10	AL133325.3	20	21499261	21502934	-	3674	lincRNA	-	-	942	863	0	1	7.22467	7.36536	0	0.0103934
ENSG00000101000	342.253	326.273	20.8737	7.30435	4.60257	7.14395e-12	1.60318e-10	PROCR	20	35172073	35216240	+	1696	protein_coding	protein C receptor [Source:HGNC Symbol;Acc:HGNC:9452]	-	448	382	15	7	7.44318	7.06253	0.447115	0.157605
ENSG00000138640	922.859	887.427	34.7895	79.3043	3.97805	7.2234e-12	1.61947e-10	FAM13A	4	88725955	89111398	-	13215	protein_coding	family with sequence similarity 13 member A [Source:HGNC Symbol;Acc:HGNC:19367]	-	1208	1039	25	76	2.57576	2.46531	0.0956371	0.219607
ENSG00000164694	380.45	333.105	0	0	10.6526	7.39711e-12	1.65684e-10	FNDC1	6	159169397	159272109	+	6854	protein_coding	fibronectin type III domain containing 1 [Source:HGNC Symbol;Acc:HGNC:21184]	fn3	498	390	0	0	2.04735	1.7842	0	0
ENSG00000213366	346.836	298.941	18.0905	16.6956	4.21723	7.84369e-12	1.75188e-10	GSTM2	1	109668022	109709551	+	9116	protein_coding	glutathione S-transferase mu 2 [Source:HGNC Symbol;Acc:HGNC:4634]	GST_N	454	350	13	16	1.40332	1.20389	0.0720929	0.0670216
ENSG00000081059	537.061	554.322	43.1389	35.4783	3.79899	7.87217e-12	1.75492e-10	TCF7	5	134114711	134151865	+	10063	protein_coding	transcription factor 7 [Source:HGNC Symbol;Acc:HGNC:11639]	HMG_box	703	649	31	34	1.96849	2.02227	0.155736	0.129018
ENSG00000116761	585.191	589.34	22.2653	48	4.0492	8.42803e-12	1.87353e-10	CTH	1	70411218	70439851	+	2414	protein_coding	cystathionine gamma-lyase [Source:HGNC Symbol;Acc:HGNC:2501]	Cys_Met_Meta_PP	766	690	16	46	8.94124	8.96261	0.335071	0.727645
ENSG00000088538	757.845	662.794	62.621	33.3913	3.89674	8.80199e-12	1.94932e-10	DOCK3	3	50675241	51384198	+	8755	protein_coding	dedicator of cytokinesis 3 [Source:HGNC Symbol;Acc:HGNC:2989]	Ded_cyto	992	776	45	32	3.19273	2.77925	0.259842	0.13957
ENSG00000149054	350.656	329.689	0	0	10.5838	1.02286e-11	2.2589e-10	ZNF215	11	6926404	7001004	+	5769	protein_coding	zinc finger protein 215 [Source:HGNC Symbol;Acc:HGNC:13007]	SCAN	459	386	0	0	2.24191	2.09802	0	0
ENSG00000133135	570.676	580.799	18.0905	45.913	4.1522	1.05125e-11	2.31735e-10	RNF128	X	106693794	106796993	+	3432	protein_coding	ring finger protein 128, E3 ubiquitin protein ligase [Source:HGNC Symbol;Acc:HGNC:21153]	-	747	680	13	44	6.1331	6.21275	0.191492	0.489558
ENSG00000253552	233.771	240.861	0	3.13043	7.08847	1.05129e-11	2.31735e-10	HOXA-AS2	7	27107777	27134302	+	5281	antisense	HOXA cluster antisense RNA 2 [Source:HGNC Symbol;Acc:HGNC:43745]	-	306	282	0	3	1.63272	1.67439	0	0.0216922
ENSG00000154134	631.792	568.842	44.5305	48	3.69646	1.2614e-11	2.77015e-10	ROBO3	11	124865386	124881470	+	7026	protein_coding	roundabout guidance receptor 3 [Source:HGNC Symbol;Acc:HGNC:13433]	I-set	827	666	32	46	3.31668	2.97227	0.230248	0.250005
ENSG00000197467	203.976	196.447	2.78316	2.08696	6.38355	1.26806e-11	2.78218e-10	COL13A1	10	69801867	69964275	+	5888	protein_coding	collagen type XIII alpha 1 chain [Source:HGNC Symbol;Acc:HGNC:2190]	Collagen	267	230	2	2	1.27776	1.22485	0.0171718	0.0129706
ENSG00000180818	498.1	524.428	29.2232	41.7391	3.84168	1.2939e-11	2.83099e-10	HOXC10	12	53985065	53990279	+	2331	protein_coding	homeobox C10 [Source:HGNC Symbol;Acc:HGNC:5122]	Homeobox	652	614	21	40	7.88155	8.2594	0.45544	0.655264
ENSG00000167281	231.479	214.383	1.39158	2.08696	6.96942	1.31701e-11	2.8789e-10	RBFOX3	17	79089345	79516148	-	9873	protein_coding	RNA binding fox-1 homolog 3 [Source:HGNC Symbol;Acc:HGNC:27097]	RRM_1	303	251	1	2	0.864769	0.797163	0.00512041	0.00773534
ENSG00000006377	341.489	314.315	0	0	10.5308	1.33448e-11	2.91169e-10	DLX6	7	97005548	97011039	+	3449	protein_coding	distal-less homeobox 6 [Source:HGNC Symbol;Acc:HGNC:2919]	Homeobox	447	368	0	0	3.65192	3.34562	0	0
ENSG00000105928	235.299	228.903	0	3.13043	7.05663	1.36799e-11	2.98204e-10	GSDME	7	24698351	24758113	-	8843	protein_coding	gasdermin E [Source:HGNC Symbol;Acc:HGNC:2810]	-	308	268	0	3	0.981426	0.950293	0	0.0129545
ENSG00000141682	2503.49	2490.6	231.002	257.739	3.35261	1.37234e-11	2.98877e-10	PMAIP1	18	59899948	59904306	+	2235	protein_coding	phorbol-12-myristate-13-acetate-induced protein 1 [Source:HGNC Symbol;Acc:HGNC:9108]	-	3277	2916	166	247	41.3148	40.9103	3.75478	4.22006
ENSG00000158321	2420.21	2443.63	263.008	181.565	3.45322	1.38371e-11	3.01075e-10	AUTS2	7	69598296	70793495	+	24197	protein_coding	AUTS2, activator of transcription and developmental regulator [Source:HGNC Symbol;Acc:HGNC:14262]	-	3168	2861	189	174	3.68918	3.70748	0.39487	0.274591
ENSG00000205927	346.836	302.357	0	0	10.5162	1.45509e-11	3.15734e-10	OLIG2	21	33025845	33029196	+	3352	protein_coding	oligodendrocyte transcription factor 2 [Source:HGNC Symbol;Acc:HGNC:9398]	HLH	454	354	0	0	3.81644	3.31148	0	0
ENSG00000169946	323.154	321.148	0	0	10.5052	1.50146e-11	3.25495e-10	ZFPM2	8	104590733	105804532	+	7775	protein_coding	zinc finger protein, FOG family member 2 [Source:HGNC Symbol;Acc:HGNC:16700]	-	423	376	0	0	1.53301	1.51639	0	0
ENSG00000005513	236.827	243.423	11.1326	2.08696	5.25524	1.54771e-11	3.34294e-10	SOX8	16	981808	986979	+	4432	protein_coding	SRY-box 8 [Source:HGNC Symbol;Acc:HGNC:11203]	HMG_box	310	285	8	2	1.97092	2.01636	0.0912523	0.0172317
ENSG00000119715	225.367	210.967	2.78316	1.04348	6.90965	1.69229e-11	3.62537e-10	ESRRB	14	76310712	76501837	+	5930	protein_coding	estrogen related receptor beta [Source:HGNC Symbol;Acc:HGNC:3473]	zf-C4	295	247	2	1	1.40176	1.30607	0.0170502	0.00643938
ENSG00000237380	288.776	348.48	0	0	10.4892	1.69686e-11	3.63187e-10	HOXD-AS2	2	176121611	176137098	-	1429	antisense	HOXD cluster antisense RNA 2 [Source:HGNC Symbol;Acc:HGNC:43756]	-	378	408	0	0	7.4536	8.95263	0	0
ENSG00000132164	323.918	309.19	0	0	10.4799	1.70507e-11	3.64613e-10	SLC6A11	3	10816200	10940733	+	6700	protein_coding	solute carrier family 6 member 11 [Source:HGNC Symbol;Acc:HGNC:11044]	SNF	424	362	0	0	1.78319	1.69417	0	0
ENSG00000253873	210.852	210.967	5.56632	8.34782	4.90126	1.78483e-11	3.8098e-10	PCDHGA11	5	141421047	141512979	+	5814	protein_coding	protocadherin gamma subfamily A, 11 [Source:HGNC Symbol;Acc:HGNC:8698]	Cadherin	276	247	4	8	1.33764	1.33212	0.0347807	0.0525429
ENSG00000171016	449.97	491.117	22.2653	38.6087	3.93856	2.02859e-11	4.28363e-10	PYGO1	15	55538890	55588947	-	8615	protein_coding	pygopus family PHD finger 1 [Source:HGNC Symbol;Acc:HGNC:30256]	PHD	589	575	16	37	1.92649	2.09284	0.0938898	0.164001
ENSG00000115825	3230.01	3272.97	125.242	322.435	3.85753	2.08784e-11	4.39695e-10	PRKD3	2	37250502	37324808	-	10244	protein_coding	protein kinase D3 [Source:HGNC Symbol;Acc:HGNC:9408]	Pkinase	4228	3832	90	309	11.6298	11.7295	0.444147	1.15183
ENSG00000164707	191.753	187.906	5.56632	4.17391	5.3022	2.11803e-11	4.45257e-10	SLC13A4	7	135681237	135729258	-	8015	protein_coding	solute carrier family 13 member 4 [Source:HGNC Symbol;Acc:HGNC:15827]	Na_sulph_symp	251	220	4	4	0.882423	0.86068	0.0252296	0.019057
ENSG00000112182	341.489	324.564	23.6568	13.5652	4.17842	2.15434e-11	4.51749e-10	BACH2	6	89926529	90296908	-	9786	protein_coding	BTB domain and CNC homolog 2 [Source:HGNC Symbol;Acc:HGNC:14078]	BTB	447	380	17	13	1.28709	1.21759	0.0878208	0.0507267
ENSG00000163064	304.055	308.336	0	0	10.4319	2.15465e-11	4.51749e-10	EN1	2	118842171	118847678	-	2886	protein_coding	engrailed homeobox 1 [Source:HGNC Symbol;Acc:HGNC:3342]	Homeobox	398	361	0	0	3.88591	3.92223	0	0
ENSG00000198597	327.737	282.713	0	0	10.4274	2.26014e-11	4.73026e-10	ZNF536	19	30228290	30713538	+	8631	protein_coding	zinc finger protein 536 [Source:HGNC Symbol;Acc:HGNC:29025]	-	429	331	0	0	1.40056	1.20251	0	0
ENSG00000167641	326.209	283.567	0	0	10.4258	2.27198e-11	4.75083e-10	PPP1R14A	19	38251237	38256591	-	1501	protein_coding	protein phosphatase 1 regulatory inhibitor subunit 14A [Source:HGNC Symbol;Acc:HGNC:14871]	-	427	332	0	0	8.01592	6.93554	0	0
ENSG00000102053	321.626	286.129	0	0	10.421	2.30987e-11	4.82579e-10	ZC3H12B	X	65366638	65507887	+	7829	protein_coding	zinc finger CCCH-type containing 12B [Source:HGNC Symbol;Acc:HGNC:17407]	-	421	335	0	0	1.51524	1.34172	0	0
ENSG00000072133	798.335	813.119	40.3558	77.2174	3.76857	2.3962e-11	4.9973e-10	RPS6KA6	X	84058346	84187907	-	8502	protein_coding	ribosomal protein S6 kinase A6 [Source:HGNC Symbol;Acc:HGNC:10435]	Pkinase	1045	952	29	74	3.46339	3.51106	0.172437	0.332361
ENSG00000184937	300.235	301.503	0	0	10.4066	2.43943e-11	5.07402e-10	WT1	11	32387775	32435630	-	4113	protein_coding	Wilms tumor 1 [Source:HGNC Symbol;Acc:HGNC:12796]	WT1	393	353	0	0	2.6924	2.69115	0	0
ENSG00000167693	1485.13	1481.89	157.248	120	3.42163	2.45576e-11	5.10347e-10	NXN	17	799313	979770	-	5880	protein_coding	nucleoredoxin [Source:HGNC Symbol;Acc:HGNC:18008]	-	1944	1735	113	115	9.31591	9.25219	0.971527	0.746826
ENSG00000188211	2039	1964.47	119.676	216	3.57308	2.46618e-11	5.12063e-10	NCR3LG1	11	17351726	17377341	+	6438	protein_coding	natural killer cell cytotoxicity receptor 3 ligand 1 [Source:HGNC Symbol;Acc:HGNC:42400]	C1-set	2669	2300	86	207	11.6816	11.2021	0.675307	1.22777
ENSG00000198121	340.725	343.355	25.0484	12.5217	4.20693	2.49799e-11	5.17758e-10	LPAR1	9	110873263	111038458	-	4159	protein_coding	lysophosphatidic acid receptor 1 [Source:HGNC Symbol;Acc:HGNC:3166]	7tm_1	446	402	18	12	3.02171	3.03082	0.218795	0.110177
ENSG00000186867	312.458	287.837	0	0	10.4032	2.50054e-11	5.17831e-10	QRFPR	4	121329312	121381059	-	2160	protein_coding	pyroglutamylated RFamide peptide receptor [Source:HGNC Symbol;Acc:HGNC:15565]	7tm_1	409	337	0	0	5.33551	4.89214	0	0
ENSG00000089486	228.423	240.861	12.5242	5.21739	4.76378	2.59299e-11	5.36507e-10	CDIP1	16	4510675	4538828	-	4268	protein_coding	cell death inducing p53 target 1 [Source:HGNC Symbol;Acc:HGNC:13234]	-	299	282	9	5	1.97403	2.0718	0.106604	0.0447347
ENSG00000165259	243.702	217.8	6.95789	11.4783	4.62373	2.76168e-11	5.68419e-10	HDX	X	84317874	84502479	-	7258	protein_coding	highly divergent homeobox [Source:HGNC Symbol;Acc:HGNC:26411]	-	319	255	5	11	1.23845	1.10166	0.0348263	0.0578728
ENSG00000153790	307.111	283.567	0	0	10.3799	2.80201e-11	5.75717e-10	C7orf31	7	25134697	25180356	-	3837	protein_coding	chromosome 7 open reading frame 31 [Source:HGNC Symbol;Acc:HGNC:21722]	-	402	332	0	0	2.95217	2.71312	0	0
ENSG00000163297	391.91	365.562	25.0484	26.0869	3.88777	2.91358e-11	5.9812e-10	ANTXR2	4	79901149	80125454	-	9864	protein_coding	anthrax toxin receptor 2 [Source:HGNC Symbol;Acc:HGNC:21732]	VWA	513	428	18	25	1.46545	1.36055	0.0922514	0.09678
ENSG00000144331	212.38	210.967	8.34947	1.04348	5.59028	2.9357e-11	6.02138e-10	ZNF385B	2	179441982	179861505	-	5310	protein_coding	zinc finger protein 385B [Source:HGNC Symbol;Acc:HGNC:26332]	-	278	247	6	1	1.47522	1.45856	0.0571229	0.00719125
ENSG00000112319	1129.13	1148.79	75.1453	118.956	3.54875	2.96225e-11	6.07055e-10	EYA4	6	133240598	133532120	+	8968	protein_coding	EYA transcriptional coactivator and phosphatase 4 [Source:HGNC Symbol;Acc:HGNC:3522]	Hydrolase	1478	1345	54	114	4.64393	4.70272	0.304405	0.485409
ENSG00000077063	213.908	187.906	0	5.21739	6.13277	3.00653e-11	6.15596e-10	CTTNBP2	7	117710651	117874139	-	7035	protein_coding	cortactin binding protein 2 [Source:HGNC Symbol;Acc:HGNC:15679]	-	280	220	0	5	1.1215	0.980576	0	0.0271397
ENSG00000144868	215.436	215.237	0	3.13043	6.94907	3.3033e-11	6.74605e-10	TMEM108	3	133038391	133397792	+	8425	protein_coding	transmembrane protein 108 [Source:HGNC Symbol;Acc:HGNC:28451]	-	282	252	0	3	0.943161	0.937893	0	0.0135972
ENSG00000147955	6392.79	6595.49	670.741	258.783	3.80607	3.30724e-11	6.74825e-10	SIGMAR1	9	34634722	34637809	-	2196	protein_coding	sigma non-opioid intracellular receptor 1 [Source:HGNC Symbol;Acc:HGNC:8157]	-	8368	7722	482	248	107.373	110.261	11.0961	4.31239
ENSG00000198756	288.012	345.917	22.2653	10.4348	4.30068	3.32899e-11	6.78092e-10	COLGALT2	1	183929854	184037729	-	7147	protein_coding	collagen beta(1-O)galactosyltransferase 2 [Source:HGNC Symbol;Acc:HGNC:16790]	-	377	405	16	10	1.48636	1.77686	0.113175	0.0534288
ENSG00000139946	584.427	578.237	0	1.04348	9.92699	3.45744e-11	7.03043e-10	PELI2	14	56117814	56301526	+	6278	protein_coding	pellino E3 ubiquitin protein ligase family member 2 [Source:HGNC Symbol;Acc:HGNC:8828]	-	765	677	0	1	3.43358	3.38135	0	0.00608244
ENSG00000163884	333.085	368.978	26.44	16.6956	4.03753	3.47996e-11	7.07012e-10	KLF15	3	126342635	126357442	-	2848	protein_coding	Kruppel like factor 15 [Source:HGNC Symbol;Acc:HGNC:14536]	zf-C2H2	436	432	19	16	4.31373	4.75627	0.337262	0.214525
ENSG00000164647	264.329	284.421	0	2.08696	7.87108	3.62419e-11	7.3564e-10	STEAP1	7	90154375	90164829	+	1625	protein_coding	STEAP family member 1 [Source:HGNC Symbol;Acc:HGNC:11378]	Ferric_reduct	346	333	0	2	5.99969	6.4256	0	0.0469976
ENSG00000180318	275.788	287.837	0	0	10.3122	3.88165e-11	7.85245e-10	ALX1	12	85280107	85301784	+	1445	protein_coding	ALX homeobox 1 [Source:HGNC Symbol;Acc:HGNC:1494]	Homeobox	361	337	0	0	7.03956	7.31282	0	0
ENSG00000162687	288.776	273.317	0	0	10.3083	3.96135e-11	7.99995e-10	KCNT2	1	196225779	196609225	-	7100	protein_coding	potassium sodium-activated channel subfamily T member 2 [Source:HGNC Symbol;Acc:HGNC:18866]	Ion_trans_2	378	320	0	0	1.50017	1.41323	0	0
ENSG00000153814	328.501	335.668	5.56632	21.913	4.55655	3.96925e-11	8.00906e-10	JAZF1	7	27830573	28180743	-	4020	protein_coding	JAZF zinc finger 1 [Source:HGNC Symbol;Acc:HGNC:28917]	-	430	393	4	21	3.01404	3.06541	0.0503023	0.199477
ENSG00000253123	291.067	269.901	0	0	10.3054	4.02984e-11	8.12438e-10	AC091182.1	8	37326575	37331984	-	4239	processed_transcript	-	-	381	316	0	0	2.53261	2.33747	0	0
ENSG00000234964	174.182	195.593	1.39158	5.21739	5.73025	4.07321e-11	8.1978e-10	FABP5P7	11	59781318	59781722	-	405	processed_pseudogene	fatty acid binding protein 5 pseudogene 7 [Source:HGNC Symbol;Acc:HGNC:31070]	-	228	229	1	5	15.863	17.7298	0.124824	0.471426
ENSG00000137821	302.527	302.357	11.1326	20.8696	4.22034	4.11781e-11	8.28052e-10	LRRC49	15	70853239	71053657	+	9991	protein_coding	leucine rich repeat containing 49 [Source:HGNC Symbol;Acc:HGNC:25965]	-	396	354	8	20	1.11684	1.11101	0.0404795	0.0764399
ENSG00000111817	1187.19	1113.77	91.8442	121.043	3.4317	4.13471e-11	8.30743e-10	DSE	6	116254173	116444860	+	19193	protein_coding	dermatan sulfate epimerase [Source:HGNC Symbol;Acc:HGNC:21144]	-	1554	1304	66	116	2.28147	2.13038	0.173842	0.230788
ENSG00000204256	1516.45	2232.66	5.56632	88.6956	5.29937	4.28345e-11	8.59164e-10	BRD2	6	32968660	32981505	+	7337	protein_coding	bromodomain containing 2 [Source:HGNC Symbol;Acc:HGNC:1103]	Bromodomain	1985	2614	4	85	7.62339	11.1715	0.027561	0.442384
ENSG00000100344	629.5	578.237	52.88	18.7826	4.09177	4.46964e-11	8.94989e-10	PNPLA3	22	43923739	43964488	+	3232	protein_coding	patatin like phospholipase domain containing 3 [Source:HGNC Symbol;Acc:HGNC:18590]	-	824	677	38	18	7.18393	6.5681	0.594382	0.212667
ENSG00000198108	210.088	201.572	9.74105	5.21739	4.81337	4.68703e-11	9.36137e-10	CHSY3	5	129904472	130186634	+	3938	protein_coding	chondroitin sulfate synthase 3 [Source:HGNC Symbol;Acc:HGNC:24293]	-	275	236	7	5	1.96772	1.87914	0.089862	0.0484834
ENSG00000196155	1501.17	1495.56	148.899	55.3043	3.88186	4.83799e-11	9.65471e-10	PLEKHG4	16	67277510	67289499	+	7328	protein_coding	pleckstrin homology and RhoGEF domain containing G4 [Source:HGNC Symbol;Acc:HGNC:24501]	RhoGEF	1965	1751	107	53	7.55585	7.49244	0.738163	0.276178
ENSG00000166105	534.006	570.55	0	1.04348	9.85304	4.95489e-11	9.87965e-10	GLB1L3	11	134274245	134319564	+	8945	protein_coding	galactosidase beta 1 like 3 [Source:HGNC Symbol;Acc:HGNC:25147]	-	699	668	0	1	2.20193	2.34163	0	0.00426892
ENSG00000198915	785.347	638.025	69.5789	44.8696	3.64265	5.04244e-11	1.00457e-09	RASGEF1A	10	43194535	43266919	-	6073	protein_coding	RasGEF domain family member 1A [Source:HGNC Symbol;Acc:HGNC:24246]	-	1028	747	50	43	4.76976	3.85691	0.416218	0.270373
ENSG00000169955	586.719	596.173	40.3558	55.3043	3.62309	5.06447e-11	1.00811e-09	ZNF747	16	30530367	30535347	-	3936	protein_coding	zinc finger protein 747 [Source:HGNC Symbol;Acc:HGNC:28350]	KRAB	768	698	29	53	5.4981	5.56062	0.372475	0.514185
ENSG00000116205	1469.85	1447.73	98.8021	161.739	3.48186	5.17893e-11	1.03003e-09	TCEANC2	1	54053587	54112519	+	12165	protein_coding	transcription elongation factor A N-terminal and central domain containing 2 [Source:HGNC Symbol;Acc:HGNC:26494]	-	1924	1695	71	155	4.45656	4.36898	0.295053	0.48654
ENSG00000077522	248.286	260.506	1.39158	1.04348	7.73249	5.43986e-11	1.0801e-09	ACTN2	1	236686454	236764631	+	5530	protein_coding	actinin alpha 2 [Source:HGNC Symbol;Acc:HGNC:164]	CH	325	305	1	1	1.65602	1.72941	0.00914173	0.00690516
ENSG00000181458	294.887	294.67	6.95789	19.8261	4.42701	5.45995e-11	1.08318e-09	TMEM45A	3	100492619	100577444	+	6005	protein_coding	transmembrane protein 45A [Source:HGNC Symbol;Acc:HGNC:25480]	-	386	345	5	19	1.81126	1.80148	0.0420931	0.12082
ENSG00000106236	255.925	281.004	0	0	10.2421	5.50455e-11	1.09111e-09	NPTX2	7	98617297	98629868	+	3016	protein_coding	neuronal pentraxin 2 [Source:HGNC Symbol;Acc:HGNC:7953]	-	335	329	0	0	3.12982	3.42048	0	0
ENSG00000198945	857.159	864.366	36.181	84.5217	3.82462	5.55499e-11	1.09926e-09	L3MBTL3	6	130013699	130141451	+	5113	protein_coding	L3MBTL3, histone methyl-lysine binding protein [Source:HGNC Symbol;Acc:HGNC:23035]	MBT	1122	1012	26	81	6.18335	6.20622	0.25707	0.604934
ENSG00000111879	869.383	817.39	48.7053	86.6087	3.63329	5.70105e-11	1.12722e-09	FAM184A	6	118959763	119149387	-	7791	protein_coding	family with sequence similarity 184 member A [Source:HGNC Symbol;Acc:HGNC:20991]	-	1138	957	35	83	4.11581	3.8516	0.227106	0.406803
ENSG00000254369	225.367	252.818	11.1326	12.5217	4.33253	6.03029e-11	1.18933e-09	HOXA-AS3	7	27129977	27155928	+	5967	antisense	HOXA cluster antisense RNA 3 [Source:HGNC Symbol;Acc:HGNC:43748]	-	295	296	8	12	1.39307	1.55546	0.0677778	0.0767934
ENSG00000128709	527.13	542.364	0	1.04348	9.80653	6.15844e-11	1.21056e-09	HOXD9	2	176122720	176124937	+	1870	protein_coding	homeobox D9 [Source:HGNC Symbol;Acc:HGNC:5140]	Hox9_act	690	635	0	1	10.3971	10.6477	0	0.0204201
novel.364	160.431	186.197	4.17474	3.13043	5.58747	6.17056e-11	1.21193e-09	-	CHR_HSCHR15_4_CTG8	30789998	30924766	+	6207	-	PF03184:DDE superfamily endonuclease	DDE	210	218	3	3	0.953332	1.10128	0.0244339	0.018456
ENSG00000075826	303.291	310.044	20.8737	17.7391	3.99456	6.32205e-11	1.23963e-09	SEC31B	10	100486642	100519864	-	7938	protein_coding	SEC31 homolog B, COPII coat complex component [Source:HGNC Symbol;Acc:HGNC:23197]	-	397	363	15	17	1.40924	1.4339	0.0955287	0.081778
ENSG00000153707	285.72	240.007	0	0	10.2119	6.541e-11	1.28149e-09	PTPRD	9	8314246	10612723	-	11165	protein_coding	protein tyrosine phosphatase, receptor type D [Source:HGNC Symbol;Acc:HGNC:9668]	I-set	374	281	0	0	0.943885	0.789169	0	0
ENSG00000110693	294.887	278.442	5.56632	18.7826	4.51877	6.73003e-11	1.31525e-09	SOX6	11	15966449	16739591	-	19636	protein_coding	SRY-box 6 [Source:HGNC Symbol;Acc:HGNC:16421]	HMG_box	386	326	4	18	0.553912	0.52058	0.0102982	0.0350041
novel.304	236.063	271.609	15.3074	11.4783	4.25515	6.74351e-11	1.3168e-09	-	CHR_HG76_PATCH	8191775	8249398	-	5236	-	PF05349:GATA-type transcription activator, N-terminal|PF00320:GATA zinc finger	GATA-N	309	318	11	11	1.6629	1.90436	0.106205	0.0802217
ENSG00000146352	242.938	270.755	0	0	10.1783	7.5307e-11	1.46325e-09	CLVS2	6	122995971	123072927	+	11485	protein_coding	clavesin 2 [Source:HGNC Symbol;Acc:HGNC:23046]	CRAL_TRIO_N	318	317	0	0	0.780194	0.865468	0	0
ENSG00000100504	8372.96	8448.07	1038.12	720	3.25859	7.5861e-11	1.4728e-09	PYGL	14	50857891	50944736	-	4798	protein_coding	glycogen phosphorylase L [Source:HGNC Symbol;Acc:HGNC:9725]	-	10960	9891	746	690	64.366	64.6402	7.86018	5.49146
ENSG00000166796	167.306	187.052	1.39158	3.13043	6.23467	7.84403e-11	1.51913e-09	LDHC	11	18412307	18452058	+	2095	protein_coding	lactate dehydrogenase C [Source:HGNC Symbol;Acc:HGNC:6544]	-	219	219	1	3	2.94555	3.2778	0.0241307	0.0546809
ENSG00000235688	192.517	189.614	2.78316	1.04348	6.71763	8.03704e-11	1.55142e-09	AC116614.1	2	949627	950274	-	539	antisense	-	-	252	222	2	1	13.174	12.9148	0.187584	0.0708451
ENSG00000108984	679.157	657.67	34.7895	66.7826	3.70907	8.46735e-11	1.62915e-09	MAP2K6	17	69414698	69553861	+	16655	protein_coding	mitogen-activated protein kinase kinase 6 [Source:HGNC Symbol;Acc:HGNC:6846]	Pkinase	889	770	25	64	1.50405	1.44967	0.0758838	0.146735
ENSG00000065675	264.329	239.153	0	0	10.1495	8.6438e-11	1.6604e-09	PRKCQ	10	6427143	6580301	-	3295	protein_coding	protein kinase C theta [Source:HGNC Symbol;Acc:HGNC:9410]	Pkinase	346	280	0	0	2.95888	2.66456	0	0
ENSG00000229847	250.578	251.964	0	0	10.1467	8.66341e-11	1.66281e-09	EMX2OS	10	117473215	117545068	-	8824	antisense	EMX2 opposite strand/antisense RNA [Source:HGNC Symbol;Acc:HGNC:18511]	-	328	295	0	0	1.04741	1.04828	0	0
ENSG00000118402	1261.29	1269.22	40.3558	123.13	3.94385	9.13943e-11	1.74849e-09	ELOVL4	6	79914812	79947580	-	3042	protein_coding	ELOVL fatty acid elongase 4 [Source:HGNC Symbol;Acc:HGNC:14415]	ELO	1651	1486	29	118	15.2931	15.3173	0.481939	1.48123
ENSG00000165617	274.26	227.195	0	0	10.1437	9.15081e-11	1.74925e-09	DACT1	14	58633967	58648321	+	4490	protein_coding	dishevelled binding antagonist of beta catenin 1 [Source:HGNC Symbol;Acc:HGNC:17748]	-	359	266	0	0	2.25297	1.85762	0	0
ENSG00000173530	505.739	500.512	0	1.04348	9.71865	9.3392e-11	1.78238e-09	TNFRSF10D	8	23135588	23164030	-	3538	protein_coding	TNF receptor superfamily member 10d [Source:HGNC Symbol;Acc:HGNC:11907]	-	662	586	0	1	5.27238	5.19353	0	0.010793
ENSG00000227124	217.728	282.713	0	0	10.1405	9.64024e-11	1.83686e-09	ZNF717	3	75709643	75785583	-	6871	protein_coding	zinc finger protein 717 [Source:HGNC Symbol;Acc:HGNC:29448]	-	285	331	0	0	1.16878	1.51053	0	0
ENSG00000148700	2134.49	2210.45	91.8442	233.739	3.73415	9.96791e-11	1.89623e-09	ADD3	10	109996368	110135565	+	6541	protein_coding	adducin 3 [Source:HGNC Symbol;Acc:HGNC:245]	Aldolase_II	2794	2588	66	224	12.0362	12.4063	0.510098	1.30768
ENSG00000185920	1227.68	1191.49	129.417	116.87	3.29691	1.01897e-10	1.93531e-09	PTCH1	9	95442980	95517057	-	16591	protein_coding	patched 1 [Source:HGNC Symbol;Acc:HGNC:9585]	-	1607	1395	93	112	2.72929	2.63648	0.283377	0.257777
ENSG00000107736	314.75	353.604	25.0484	7.30435	4.40244	1.02649e-10	1.94645e-09	CDH23	10	71396934	71815947	+	18587	protein_coding	cadherin related 23 [Source:HGNC Symbol;Acc:HGNC:13733]	Cadherin	412	414	18	7	0.624589	0.698415	0.0489572	0.0143809
ENSG00000268916	216.2	278.442	0	0	10.1237	1.04066e-10	1.97175e-09	CSAG3	X	152753921	152760222	+	1083	protein_coding	CSAG family member 3 [Source:HGNC Symbol;Acc:HGNC:26237]	-	283	326	0	0	7.36316	9.43869	0	0
ENSG00000132386	627.208	619.234	62.621	44.8696	3.54054	1.04208e-10	1.97286e-09	SERPINF1	17	1761959	1777574	+	3069	protein_coding	serpin family F member 1 [Source:HGNC Symbol;Acc:HGNC:8824]	Serpin	821	725	45	43	7.53794	7.40736	0.741258	0.53502
ENSG00000078549	236.063	252.818	0	0	10.1069	1.05572e-10	1.99708e-09	ADCYAP1R1	7	31052461	31111479	+	6832	protein_coding	ADCYAP receptor type I [Source:HGNC Symbol;Acc:HGNC:242]	7tm_2	309	296	0	0	1.27443	1.35852	0	0
ENSG00000054598	5327.07	5481.72	599.77	628.174	3.1378	1.13363e-10	2.1376e-09	FOXC1	6	1609972	1613897	+	3926	protein_coding	forkhead box C1 [Source:HGNC Symbol;Acc:HGNC:3800]	Fork_head	6973	6418	431	602	50.0467	51.2592	5.54984	5.85524
ENSG00000188153	1430.13	1479.33	91.8442	166.956	3.48696	1.14807e-10	2.16311e-09	COL4A5	X	108439844	108697545	+	11865	protein_coding	collagen type IV alpha 5 chain [Source:HGNC Symbol;Acc:HGNC:2207]	Collagen	1872	1732	66	160	4.44574	4.57723	0.281209	0.514933
ENSG00000070886	172.654	175.948	4.17474	1.04348	6.15423	1.14989e-10	2.1648e-09	EPHA8	1	22563564	22603594	+	5358	protein_coding	EPH receptor A8 [Source:HGNC Symbol;Acc:HGNC:3391]	Pkinase_Tyr	226	206	3	1	1.18854	1.20556	0.0283056	0.00712683
ENSG00000188677	1053.5	1089	116.893	55.3043	3.6437	1.16827e-10	2.19765e-09	PARVB	22	43999211	44172949	+	7403	protein_coding	parvin beta [Source:HGNC Symbol;Acc:HGNC:14653]	CH	1379	1275	84	53	5.24884	5.40039	0.573621	0.27338
ENSG00000148600	488.932	480.868	1.39158	0	9.65147	1.17837e-10	2.21488e-09	CDHR1	10	84194635	84219621	+	7633	protein_coding	cadherin related family member 1 [Source:HGNC Symbol;Acc:HGNC:14550]	Cadherin	640	563	1	0	2.36261	2.31279	0.00662306	0
ENSG00000090932	190.225	195.593	0	3.13043	6.79138	1.18568e-10	2.22483e-09	DLL3	19	39498895	39508481	+	2618	protein_coding	delta like canonical Notch ligand 3 [Source:HGNC Symbol;Acc:HGNC:2909]	EGF	249	229	0	3	2.68001	2.74276	0	0.0437573
ENSG00000095777	240.646	236.59	0	0	10.0722	1.24248e-10	2.32245e-09	MYO3A	10	25934071	26212536	+	8599	protein_coding	myosin IIIA [Source:HGNC Symbol;Acc:HGNC:7601]	Myosin_head	315	277	0	0	1.03221	1.01008	0	0
ENSG00000184226	2306.38	2470.1	160.032	285.913	3.41871	1.27379e-10	2.3772e-09	PCDH9	13	66302834	67230445	-	30944	protein_coding	protocadherin 9 [Source:HGNC Symbol;Acc:HGNC:8661]	Cadherin	3019	2892	115	274	2.74912	2.93052	0.187878	0.338122
ENSG00000168676	236.063	230.611	0	0	10.0399	1.45216e-10	2.70155e-09	KCTD19	16	67289428	67326763	-	7383	protein_coding	potassium channel tetramerization domain containing 19 [Source:HGNC Symbol;Acc:HGNC:24753]	-	309	270	0	0	1.17932	1.14671	0	0
ENSG00000146250	188.697	157.157	5.56632	5.21739	5.00715	1.4781e-10	2.74763e-09	PRSS35	6	83512538	83525704	+	2440	protein_coding	serine protease 35 [Source:HGNC Symbol;Acc:HGNC:21387]	Trypsin	247	184	4	5	2.85242	2.36456	0.0828751	0.078249
ENSG00000155970	186.405	170.823	4.17474	7.30435	4.92999	1.48584e-10	2.75986e-09	MICU3	8	17027238	17122644	+	4606	protein_coding	mitochondrial calcium uptake family member 3 [Source:HGNC Symbol;Acc:HGNC:27820]	-	244	200	3	7	1.4927	1.36153	0.0329269	0.0580327
ENSG00000105880	234.535	233.174	0	2.08696	7.64145	1.64426e-10	3.04691e-09	DLX5	7	97020392	97024950	-	1748	protein_coding	distal-less homeobox 5 [Source:HGNC Symbol;Acc:HGNC:2918]	Homeobox	307	273	0	2	4.94884	4.89715	0	0.0436905
ENSG00000171956	253.634	205.842	0	0	10.0176	1.69462e-10	3.13532e-09	FOXB1	15	60004222	60061730	+	3615	protein_coding	forkhead box B1 [Source:HGNC Symbol;Acc:HGNC:3799]	-	332	241	0	0	2.58783	2.09041	0	0
ENSG00000179455	216.964	251.11	0	2.08696	7.64262	1.6988e-10	3.13813e-09	MKRN3	15	23565678	23630075	+	5731	protein_coding	makorin ring finger protein 3 [Source:HGNC Symbol;Acc:HGNC:7114]	-	284	294	0	2	1.39635	1.60857	0	0.013326
ENSG00000169330	307.874	319.44	5.56632	22.9565	4.42115	2.03832e-10	3.75064e-09	KIAA1024	15	79432516	79472290	+	6800	protein_coding	KIAA1024 [Source:HGNC Symbol;Acc:HGNC:29172]	-	403	374	4	22	1.66995	1.72459	0.0297375	0.123541
ENSG00000198689	1394.98	1451.14	101.585	170.087	3.38575	2.04491e-10	3.75984e-09	SLC9A6	X	135973841	136047269	+	7465	protein_coding	solute carrier family 9 member A6 [Source:HGNC Symbol;Acc:HGNC:11079]	Na_H_Exchanger	1826	1699	73	163	6.89251	7.13651	0.494364	0.83379
ENSG00000164039	628.736	552.613	41.7474	60.5217	3.52441	2.09931e-10	3.85385e-09	BDH2	4	103079435	103099883	-	3383	protein_coding	3-hydroxybutyrate dehydrogenase 2 [Source:HGNC Symbol;Acc:HGNC:32389]	-	823	647	30	58	6.85495	5.99687	0.448304	0.654674
ENSG00000170681	213.908	228.049	13.9158	8.34782	4.33186	2.11553e-10	3.8776e-09	CAVIN4	9	100578079	100587906	+	2615	protein_coding	caveolae associated protein 4 [Source:HGNC Symbol;Acc:HGNC:33742]	-	280	267	10	8	3.01712	3.20156	0.193322	0.11682
ENSG00000050165	226.131	206.696	0	0	9.93133	2.46598e-10	4.47134e-09	DKK3	11	11963106	12009769	-	5059	protein_coding	dickkopf WNT signaling pathway inhibitor 3 [Source:HGNC Symbol;Acc:HGNC:2893]	-	296	242	0	0	1.64867	1.49994	0	0
ENSG00000112238	197.101	237.444	0	0	9.93682	2.47139e-10	4.47771e-09	PRDM13	6	99606730	99615578	+	3276	protein_coding	PR/SET domain 13 [Source:HGNC Symbol;Acc:HGNC:13998]	-	258	278	0	0	2.21913	2.66087	0	0
ENSG00000253187	216.2	213.529	0	0	9.9209	2.57071e-10	4.65053e-09	HOXA10-AS	7	27168619	27171915	+	1654	antisense	HOXA10 antisense RNA [Source:HGNC Symbol;Acc:HGNC:40281]	-	283	250	0	0	4.82122	4.73944	0	0
ENSG00000189184	220.783	208.404	0	0	9.91912	2.60144e-10	4.70251e-09	PCDH18	4	137518918	137532494	-	6686	protein_coding	protocadherin 18 [Source:HGNC Symbol;Acc:HGNC:14268]	Cadherin	289	244	0	0	1.21797	1.14432	0	0
ENSG00000184515	158.903	172.532	4.17474	6.26087	4.96624	2.89392e-10	5.21923e-09	BEX5	X	102153708	102156057	-	1063	protein_coding	brain expressed X-linked 5 [Source:HGNC Symbol;Acc:HGNC:27990]	-	208	202	3	6	5.51362	5.95855	0.142673	0.215535
ENSG00000186814	1279.63	1377.69	94.6274	160.696	3.376	2.93548e-10	5.29014e-09	ZSCAN30	18	35251058	35290245	-	8271	protein_coding	zinc finger and SCAN domain containing 30 [Source:HGNC Symbol;Acc:HGNC:33517]	zf-C2H2	1675	1613	68	154	5.70641	6.11503	0.415628	0.710987
ENSG00000141431	246.758	179.364	0	0	9.90898	3.02337e-10	5.43608e-09	ASXL3	18	33578233	33751192	+	13619	protein_coding	additional sex combs like 3, transcriptional regulator [Source:HGNC Symbol;Acc:HGNC:29357]	-	323	210	0	0	0.668288	0.4835	0	0
ENSG00000164066	1038.22	1088.14	34.7895	109.565	3.8713	3.20738e-10	5.73635e-09	INTU	4	127623271	127726737	+	16066	protein_coding	inturned planar cell polarity protein [Source:HGNC Symbol;Acc:HGNC:29239]	-	1359	1274	25	105	2.38352	2.48648	0.0786658	0.249563
ENSG00000148704	227.659	195.593	1.39158	1.04348	7.46689	3.24746e-10	5.80363e-09	VAX1	10	117128521	117138301	-	5788	protein_coding	ventral anterior homeobox 1 [Source:HGNC Symbol;Acc:HGNC:12660]	Homeobox	298	229	1	1	1.45076	1.24059	0.00873424	0.00659736
ENSG00000061918	523.31	559.446	37.5726	56.3478	3.52058	3.27394e-10	5.84653e-09	GUCY1B1	4	155758992	155807591	+	3724	protein_coding	guanylate cyclase 1 soluble subunit beta 1 [Source:HGNC Symbol;Acc:HGNC:4687]	Guanylate_cyc	685	655	27	54	5.18307	5.51511	0.366529	0.553711
ENSG00000117707	229.187	187.906	0	0	9.87799	3.29021e-10	5.87115e-09	PROX1	1	213983181	214041502	+	8928	protein_coding	prospero homeobox 1 [Source:HGNC Symbol;Acc:HGNC:9459]	Prox1	300	220	0	0	0.946833	0.772665	0	0
ENSG00000044459	732.634	714.041	37.5726	79.3043	3.62072	3.38177e-10	6.02088e-09	CNTLN	9	17134982	17503923	+	11064	protein_coding	centlein [Source:HGNC Symbol;Acc:HGNC:23432]	-	959	836	27	76	2.44238	2.36928	0.123369	0.262301
ENSG00000011677	202.448	222.924	2.78316	0	7.44127	3.40001e-10	6.04879e-09	GABRA3	X	152166234	152451358	-	4193	protein_coding	gamma-aminobutyric acid type A receptor alpha3 subunit [Source:HGNC Symbol;Acc:HGNC:4077]	Neur_chan_LBD	265	261	2	0	1.78085	1.95181	0.0241134	0
ENSG00000127920	233.007	181.927	0	0	9.87055	3.4889e-10	6.19758e-09	GNG11	7	93921699	93928610	+	3055	protein_coding	G protein subunit gamma 11 [Source:HGNC Symbol;Acc:HGNC:4403]	-	305	213	0	0	2.81316	2.18621	0	0
ENSG00000139973	194.809	139.221	4.17474	6.26087	4.97821	3.80462e-10	6.72301e-09	SYT16	14	61811974	62112550	+	15234	protein_coding	synaptotagmin 16 [Source:HGNC Symbol;Acc:HGNC:23142]	-	255	163	3	6	0.471664	0.335503	0.00995545	0.0150396
ENSG00000104870	411.773	369.832	36.181	13.5652	3.9952	3.82087e-10	6.74668e-09	FCGRT	19	49506816	49526333	+	4173	protein_coding	Fc fragment of IgG receptor and transporter [Source:HGNC Symbol;Acc:HGNC:3621]	-	539	433	26	13	3.63954	3.25358	0.314977	0.118958
ENSG00000198795	441.567	374.103	1.39158	0	9.40152	3.90435e-10	6.88378e-09	ZNF521	18	25061926	25352190	-	6223	protein_coding	zinc finger protein 521 [Source:HGNC Symbol;Acc:HGNC:24605]	-	578	438	1	0	2.61719	2.20697	0.0081237	0
ENSG00000108576	194.809	217.8	1.39158	1.04348	7.42991	4.04547e-10	7.11665e-09	SLC6A4	17	30194319	30236002	-	6983	protein_coding	solute carrier family 6 member 4 [Source:HGNC Symbol;Acc:HGNC:11050]	SNF	255	255	1	1	1.02897	1.14504	0.00723955	0.00546836
ENSG00000153132	665.406	650.837	19.4821	64.6956	3.95156	4.36286e-10	7.64084e-09	CLGN	4	140388455	140427968	-	3127	protein_coding	calmegin [Source:HGNC Symbol;Acc:HGNC:2060]	-	871	762	14	62	7.84868	7.64099	0.226336	0.757116
ENSG00000156869	420.94	457.806	34.7895	41.7391	3.51779	4.39845e-10	7.69745e-09	FRRS1	1	99708632	99766631	-	3958	protein_coding	ferric chelate reductase 1 [Source:HGNC Symbol;Acc:HGNC:27622]	-	551	536	25	40	3.92267	4.24631	0.319314	0.385907
ENSG00000214076	275.024	251.11	20.8737	8.34782	4.1997	4.47094e-10	7.81273e-09	CPSF1P1	22	32269381	32273110	+	3730	processed_pseudogene	cleavage and polyadenylation specific factor 1 pseudogene 1 [Source:HGNC Symbol;Acc:HGNC:19251]	-	360	294	15	8	2.71957	2.4715	0.203299	0.0818993
ENSG00000136717	876.258	816.535	100.194	60.5217	3.402	4.57952e-10	7.99655e-09	BIN1	2	127048027	127107355	-	6929	protein_coding	bridging integrator 1 [Source:HGNC Symbol;Acc:HGNC:1052]	-	1147	956	72	58	4.66444	4.32623	0.52531	0.319636
ENSG00000168917	211.616	186.197	0	9.3913	5.30199	4.61821e-10	8.05815e-09	SLC35G2	3	136818647	136855892	+	4287	protein_coding	solute carrier family 35 member G2 [Source:HGNC Symbol;Acc:HGNC:28480]	DUF6	277	218	0	9	1.82068	1.5945	0	0.0801656
ENSG00000145087	152.027	158.012	5.56632	2.08696	5.40052	4.64852e-10	8.10504e-09	STXBP5L	3	120908072	121424761	+	11085	protein_coding	syntaxin binding protein 5 like [Source:HGNC Symbol;Acc:HGNC:30757]	-	199	185	4	2	0.505852	0.523309	0.0182422	0.00688959
ENSG00000116711	383.506	402.289	1.39158	0	9.34761	4.87324e-10	8.4656e-09	PLA2G4A	1	186828953	186988981	+	2875	protein_coding	phospholipase A2 group IVA [Source:HGNC Symbol;Acc:HGNC:9035]	C2	502	471	1	0	4.92008	5.13695	0.0175839	0
ENSG00000170153	958.001	876.324	105.76	88.6956	3.23943	5.03682e-10	8.72408e-09	RNF150	4	140859807	141212877	-	11007	protein_coding	ring finger protein 150 [Source:HGNC Symbol;Acc:HGNC:23138]	-	1254	1026	76	85	3.21022	2.92281	0.349059	0.294882
ENSG00000086619	521.782	573.112	16.6989	53.2174	3.95149	5.04648e-10	8.73441e-09	ERO1B	1	236215555	236281985	-	5361	protein_coding	endoplasmic reticulum oxidoreductase 1 beta [Source:HGNC Symbol;Acc:HGNC:14355]	-	683	671	12	51	3.58989	3.92464	0.113159	0.363265
ENSG00000006611	211.616	176.802	0	0	9.77523	5.32529e-10	9.1766e-09	USH1C	11	17493895	17544416	-	4904	protein_coding	USH1 protein network component harmonin [Source:HGNC Symbol;Acc:HGNC:12597]	PDZ	277	207	0	0	1.59161	1.32356	0	0
ENSG00000091986	295.651	286.129	19.4821	22.9565	3.77234	5.52345e-10	9.47777e-09	CCDC80	3	112596794	112649530	-	13071	protein_coding	coiled-coil domain containing 80 [Source:HGNC Symbol;Acc:HGNC:30649]	-	387	335	14	22	0.834274	0.803635	0.0541468	0.0642706
ENSG00000154640	640.196	588.486	18.0905	60.5217	3.95005	5.52415e-10	9.47777e-09	BTG3	21	17593653	17612947	-	2306	protein_coding	BTG anti-proliferation factor 3 [Source:HGNC Symbol;Acc:HGNC:1132]	-	838	689	13	58	10.2398	9.36877	0.284995	0.960434
ENSG00000237943	187.169	197.301	0	0	9.76029	5.54457e-10	9.5059e-09	PRKCQ-AS1	10	6580419	6616452	+	3892	processed_transcript	PRKCQ antisense RNA 1 [Source:HGNC Symbol;Acc:HGNC:44689]	-	245	231	0	0	1.77378	1.86107	0	0
ENSG00000134532	154.319	164.844	1.39158	6.26087	5.30533	5.56945e-10	9.54162e-09	SOX5	12	23529500	24562544	-	10445	protein_coding	SRY-box 5 [Source:HGNC Symbol;Acc:HGNC:11201]	HMG_box	202	193	1	6	0.544941	0.579391	0.00484	0.0219352
ENSG00000137463	213.144	190.468	2.78316	0	7.36514	5.60942e-10	9.60314e-09	MGARP	4	139266163	139280338	-	1339	protein_coding	mitochondria localized glutamic acid rich protein [Source:HGNC Symbol;Acc:HGNC:29969]	-	279	223	2	0	5.87124	5.22212	0.0755098	0
ENSG00000120162	227.659	216.091	15.3074	10.4348	4.12208	5.62022e-10	9.61465e-09	MOB3B	9	27325209	27529781	-	7087	protein_coding	MOB kinase activator 3B [Source:HGNC Symbol;Acc:HGNC:23825]	-	298	253	11	10	1.18484	1.11939	0.0784664	0.0538811
novel.100	152.027	163.136	5.56632	5.21739	4.87279	5.84699e-10	9.98811e-09	-	2	10215002	10219192	+	4191	-	-	-	199	191	4	5	1.33796	1.42902	0.0482499	0.0455566
ENSG00000173068	182.586	199.009	0	0	9.74943	5.86478e-10	1.0004e-08	BNC2	9	16409503	16870843	-	15323	protein_coding	basonuclin 2 [Source:HGNC Symbol;Acc:HGNC:30988]	-	239	233	0	0	0.439502	0.476798	0	0
ENSG00000173157	190.989	206.696	2.78316	0	7.34356	6.37996e-10	1.08436e-08	ADAMTS20	12	43353866	43551921	-	7242	protein_coding	ADAM metallopeptidase with thrombospondin type 1 motif 20 [Source:HGNC Symbol;Acc:HGNC:17178]	TSP_1	250	242	2	0	0.97272	1.0478	0.0139613	0
ENSG00000173376	194.045	181.073	0	0	9.72487	6.57341e-10	1.11404e-08	NDNF	4	121035613	121073021	-	3556	protein_coding	neuron derived neurotrophic factor [Source:HGNC Symbol;Acc:HGNC:26256]	-	254	212	0	0	2.0127	1.86938	0	0
ENSG00000087116	170.362	147.762	2.78316	1.04348	6.45218	6.88976e-10	1.16514e-08	ADAMTS2	5	179110851	179345430	-	8726	protein_coding	ADAM metallopeptidase with thrombospondin type 1 motif 2 [Source:HGNC Symbol;Acc:HGNC:218]	TSP_1	223	173	2	1	0.720105	0.621661	0.0115869	0.00437606
ENSG00000183196	163.487	140.929	4.17474	1.04348	5.95744	6.9478e-10	1.17411e-08	CHST6	16	75472052	75495384	-	8469	protein_coding	carbohydrate sulfotransferase 6 [Source:HGNC Symbol;Acc:HGNC:6938]	Sulfotransfer_1	214	165	3	1	0.712013	0.610906	0.0179078	0.00450886
ENSG00000113196	181.058	190.468	0	0	9.71088	7.0078e-10	1.18341e-08	HAND1	5	154474972	154478264	-	1738	protein_coding	heart and neural crest derivatives expressed 1 [Source:HGNC Symbol;Acc:HGNC:4807]	HLH	237	223	0	0	3.84242	4.02326	0	0
ENSG00000174010	2181.1	2195.93	93.2358	258.783	3.6323	7.01404e-10	1.18361e-08	KLHL15	X	23983720	24027186	-	6272	protein_coding	kelch like family member 15 [Source:HGNC Symbol;Acc:HGNC:29347]	BTB	2855	2571	67	248	12.8265	12.8534	0.540036	1.50989
ENSG00000205663	182.586	185.343	0	0	9.69688	7.47152e-10	1.25632e-08	FAM239B	X	3891438	3920746	-	3700	lincRNA	family with sequence similarity 239 member B (non-protein coding) [Source:HGNC Symbol;Acc:HGNC:53415]	-	239	217	0	0	1.82013	1.839	0	0
ENSG00000101445	197.865	169.969	0	0	9.69666	7.64936e-10	1.28348e-08	PPP1R16B	20	38805705	38923024	+	6400	protein_coding	protein phosphatase 1 regulatory subunit 16B [Source:HGNC Symbol;Acc:HGNC:15850]	-	259	199	0	0	1.14032	0.97498	0	0
ENSG00000249992	295.651	302.357	25.0484	20.8696	3.70802	7.66497e-10	1.28519e-08	TMEM158	3	45224466	45226278	-	1813	protein_coding	transmembrane protein 158 (gene/pseudogene) [Source:HGNC Symbol;Acc:HGNC:30293]	-	387	354	18	20	6.01478	6.12249	0.501913	0.421241
ENSG00000164107	178.002	187.052	0	0	9.68553	7.90097e-10	1.32288e-08	HAND2	4	173524969	173530229	-	3601	protein_coding	heart and neural crest derivatives expressed 2 [Source:HGNC Symbol;Acc:HGNC:4808]	HLH	233	219	0	0	1.82322	1.90697	0	0
ENSG00000145242	184.114	178.51	0	0	9.67597	8.25521e-10	1.37731e-08	EPHA5	4	65319563	65670495	-	9833	protein_coding	EPH receptor A5 [Source:HGNC Symbol;Acc:HGNC:3389]	Pkinase_Tyr	241	209	0	0	0.690617	0.666473	0	0
ENSG00000204262	493.516	521.011	50.0968	49.0435	3.35551	8.75075e-10	1.45382e-08	COL5A2	2	189031896	189179879	-	7156	protein_coding	collagen type V alpha 2 chain [Source:HGNC Symbol;Acc:HGNC:2210]	VWC	646	610	36	47	2.54372	2.6729	0.254323	0.250799
ENSG00000235501	187.169	172.532	0	0	9.66434	8.77061e-10	1.45609e-08	AC105942.1	1	94927566	94963270	+	1012	antisense	-	-	245	202	0	0	6.82169	6.25883	0	0
ENSG00000116396	571.439	547.489	62.621	28.1739	3.63505	8.9949e-10	1.49019e-08	KCNC4	1	110211343	110283100	+	25042	protein_coding	potassium voltage-gated channel subfamily C member 4 [Source:HGNC Symbol;Acc:HGNC:6236]	-	748	641	45	27	0.841664	0.802623	0.0908442	0.0411712
ENSG00000159387	155.847	140.075	5.56632	3.13043	5.12371	9.35862e-10	1.54719e-08	IRX6	16	55323760	55330760	+	3399	protein_coding	iroquois homeobox 6 [Source:HGNC Symbol;Acc:HGNC:14675]	Coprinus_mating	204	164	4	3	1.69116	1.51292	0.0594925	0.033703
ENSG00000198947	358.296	351.042	0	1.04348	9.21453	9.71366e-10	1.60476e-08	DMD	X	31097677	33339441	-	18910	protein_coding	dystrophin [Source:HGNC Symbol;Acc:HGNC:2928]	CH	469	411	0	1	0.698856	0.681511	0	0.00201933
ENSG00000109063	191.753	203.28	12.5242	9.3913	4.18376	9.75431e-10	1.61035e-08	MYH3	17	10628526	10657309	-	6684	protein_coding	myosin heavy chain 3 [Source:HGNC Symbol;Acc:HGNC:7573]	Myosin_head	251	238	9	9	1.05814	1.11651	0.0680706	0.0514168
ENSG00000173581	730.342	755.039	89.061	65.7391	3.26574	9.83216e-10	1.62207e-08	CCDC106	19	55641062	55653161	+	2709	protein_coding	coiled-coil domain containing 106 [Source:HGNC Symbol;Acc:HGNC:30181]	-	956	884	64	63	9.94387	10.2321	1.19433	0.888036
ENSG00000106714	162.723	196.447	4.17474	10.4348	4.57915	1.03974e-09	1.71411e-08	CNTNAP3	9	39072767	39288315	-	9521	protein_coding	contactin associated protein like 3 [Source:HGNC Symbol;Acc:HGNC:13834]	F5_F8_type_C	213	230	3	10	0.630381	0.757474	0.0159291	0.0401066
ENSG00000140807	365.171	350.188	32.0063	30.2609	3.52341	1.05641e-09	1.73917e-08	NKD1	16	50548330	50649249	+	17425	protein_coding	naked cuticle homolog 1 [Source:HGNC Symbol;Acc:HGNC:17045]	-	478	410	23	29	0.772968	0.737792	0.0667281	0.0635512
ENSG00000136866	178.002	171.677	0	0	9.62353	1.05797e-09	1.74053e-08	ZFP37	9	113038380	113056759	-	6354	protein_coding	ZFP37 zinc finger protein [Source:HGNC Symbol;Acc:HGNC:12863]	KRAB	233	201	0	0	1.03327	0.991908	0	0
ENSG00000231789	147.444	147.762	4.17474	5.21739	4.96096	1.06404e-09	1.74846e-08	PIK3CD-AS2	1	9672426	9687555	-	939	antisense	PIK3CD antisense RNA 2 [Source:HGNC Symbol;Acc:HGNC:51334]	-	193	173	3	5	5.79159	5.77701	0.161514	0.203331
novel.261	304.819	313.461	25.0484	25.0435	3.62559	1.06428e-09	1.74846e-08	-	CHR_HG2285_HG106_HG2252_PATCH	439978	452985	-	3925	-	PF15068:FAM101 family	-	399	367	18	24	2.86444	2.9319	0.231839	0.233491
ENSG00000251629	168.834	180.219	0	0	9.62085	1.07435e-09	1.76379e-08	LINC02241	5	20611840	20937691	+	1926	lincRNA	long intergenic non-protein coding RNA 2241 [Source:HGNC Symbol;Acc:HGNC:53126]	-	221	211	0	0	3.23327	3.43517	0	0
ENSG00000281344	271.205	288.691	8.34947	24	4.08435	1.12511e-09	1.84584e-08	HELLPAR	12	102197585	102402596	+	205012	macro_lncRNA	HELLP associated long non-coding RNA [Source:HGNC Symbol;Acc:HGNC:43984]	Transposase_22	355	338	6	23	0.0487928	0.0516964	0.00147954	0.00428398
ENSG00000169126	254.398	204.988	13.9158	15.6522	3.95368	1.14148e-09	1.8714e-08	ARMC4	10	27812164	27999048	-	4773	protein_coding	armadillo repeat containing 4 [Source:HGNC Symbol;Acc:HGNC:25583]	Arm	333	240	10	15	1.96589	1.57668	0.105916	0.120005
ENSG00000272763	169.598	170.823	0	0	9.58478	1.26844e-09	2.07091e-08	AC103702.2	17	48635923	48647023	-	1596	lincRNA	-	-	222	200	0	0	3.91946	3.92934	0	0
ENSG00000237863	340.725	339.084	0	1.04348	9.15322	1.28315e-09	2.09058e-08	AL035425.1	X	108736011	108738903	+	1498	antisense	-	-	446	397	0	1	8.38937	8.31	0	0.025491
ENSG00000115604	152.027	159.72	0	3.13043	6.48604	1.31261e-09	2.13524e-08	IL18R1	2	102311529	102398775	+	4353	protein_coding	interleukin 18 receptor 1 [Source:HGNC Symbol;Acc:HGNC:5988]	TIR	199	187	0	3	1.28816	1.34702	0	0.0263167
ENSG00000180815	139.804	154.595	5.56632	1.04348	5.57217	1.3395e-09	2.17191e-08	MAP3K15	X	19360056	19515261	-	5573	protein_coding	mitogen-activated protein kinase kinase kinase 15 [Source:HGNC Symbol;Acc:HGNC:31689]	Pkinase	183	181	4	1	0.92527	1.01839	0.0362848	0.00685188
ENSG00000175600	144.388	134.95	2.78316	4.17391	5.3014	1.35892e-09	2.19886e-08	SUGCT	7	40134977	40860763	+	2857	protein_coding	succinyl-CoA:glutarate-CoA transferase [Source:HGNC Symbol;Acc:HGNC:16001]	CoA_transf_3	189	158	2	4	1.86405	1.73408	0.0353894	0.0534624
ENSG00000141750	142.86	169.115	0	3.13043	6.48722	1.37814e-09	2.22843e-08	STAC2	17	39210536	39225872	-	3362	protein_coding	SH3 and cysteine rich domain 2 [Source:HGNC Symbol;Acc:HGNC:23990]	C1_1	187	198	0	3	1.56729	1.84667	0	0.0340739
ENSG00000158163	408.717	351.042	34.7895	8.34782	4.16739	1.3937e-09	2.25051e-08	DZIP1L	3	138061990	138115818	-	5045	protein_coding	DAZ interacting zinc finger protein 1 like [Source:HGNC Symbol;Acc:HGNC:26551]	-	535	411	25	8	2.98813	2.55448	0.250514	0.0605519
ENSG00000046653	598.178	593.611	50.0968	69.913	3.30741	1.44002e-09	2.32372e-08	GPM6B	X	13771031	13938638	-	5675	protein_coding	glycoprotein M6B [Source:HGNC Symbol;Acc:HGNC:4461]	-	783	695	36	67	3.88779	3.84009	0.320694	0.450825
ENSG00000102098	1715.08	1750.94	86.2779	219.13	3.50015	1.50427e-09	2.42077e-08	SCML2	X	18239314	18354727	-	4203	protein_coding	Scm polycomb group protein like 2 [Source:HGNC Symbol;Acc:HGNC:10581]	MBT	2245	2050	62	210	15.0509	15.2939	0.745738	1.90791
ENSG00000106829	4208.64	4179.19	598.379	352.696	3.14171	1.51319e-09	2.43347e-08	TLE4	9	79571773	79726882	+	8187	protein_coding	transducin like enhancer of split 4 [Source:HGNC Symbol;Acc:HGNC:11840]	-	5509	4893	430	338	18.9607	18.7401	2.6552	1.57649
ENSG00000147180	3980.98	3747.86	132.2	451.826	3.7236	1.5159e-09	2.43617e-08	ZNF711	X	85244032	85273362	+	5004	protein_coding	zinc finger protein 711 [Source:HGNC Symbol;Acc:HGNC:13128]	Zfx_Zfy_act	5211	4388	95	433	29.3434	27.4962	0.959754	3.30422
ENSG00000138449	164.251	166.553	0	0	9.54342	1.54111e-09	2.47164e-08	SLC40A1	2	189560579	189583758	-	4330	protein_coding	solute carrier family 40 member 1 [Source:HGNC Symbol;Acc:HGNC:10909]	-	215	195	0	0	1.39913	1.41211	0	0
ENSG00000165349	171.89	188.76	2.78316	0	7.20149	1.59371e-09	2.55426e-08	SLC7A3	X	70925582	70931125	-	2265	protein_coding	solute carrier family 7 member 3 [Source:HGNC Symbol;Acc:HGNC:11061]	-	225	221	2	0	2.79911	3.05947	0.0446391	0
ENSG00000026950	291.831	283.567	22.2653	24	3.63454	1.62976e-09	2.6085e-08	BTN3A1	6	26402237	26415216	+	5547	protein_coding	butyrophilin subfamily 3 member A1 [Source:HGNC Symbol;Acc:HGNC:1138]	SPRY	382	332	16	23	1.94049	1.87673	0.145819	0.158332
ENSG00000198729	268.149	263.068	2.78316	19.8261	4.50449	1.64759e-09	2.63346e-08	PPP1R14C	6	150143076	150250357	+	2152	protein_coding	protein phosphatase 1 regulatory inhibitor subunit 14C [Source:HGNC Symbol;Acc:HGNC:14952]	-	351	308	2	19	4.59591	4.48777	0.0469831	0.33714
ENSG00000227128	170.362	126.409	2.78316	1.04348	6.35133	1.71967e-09	2.74496e-08	LBX1-AS1	10	101229594	101270148	+	3448	processed_transcript	LBX1 antisense RNA 1 (head to head) [Source:HGNC Symbol;Acc:HGNC:48678]	-	223	148	2	1	1.8224	1.34591	0.0293235	0.0110747
ENSG00000276644	1485.9	1428.94	180.905	177.391	3.0243	1.72747e-09	2.75555e-08	DACH1	13	71437966	71867192	-	5389	protein_coding	dachshund family transcription factor 1 [Source:HGNC Symbol;Acc:HGNC:2663]	-	1945	1673	130	170	10.1699	9.73443	1.21952	1.20459
ENSG00000168671	159.667	204.988	11.1326	8.34782	4.23857	2.00543e-09	3.17534e-08	UGT3A2	5	36035017	36071358	-	2694	protein_coding	UDP glycosyltransferase family 3 member A2 [Source:HGNC Symbol;Acc:HGNC:27266]	UDPGT	209	240	8	8	2.18602	2.79342	0.150123	0.113394
ENSG00000153982	300.235	376.665	25.0484	32.3478	3.55391	2.02554e-09	3.20287e-08	GDPD1	17	59220467	59275967	+	2970	protein_coding	glycerophosphodiester phosphodiesterase domain containing 1 [Source:HGNC Symbol;Acc:HGNC:20883]	-	393	441	18	31	3.72857	4.65591	0.306387	0.398569
ENSG00000086289	1019.12	1044.58	96.0189	136.696	3.14585	2.06924e-09	3.2676e-08	EPDR1	7	37683843	37951941	+	2864	protein_coding	ependymin related 1 [Source:HGNC Symbol;Acc:HGNC:17572]	-	1334	1223	69	131	13.1247	13.3899	1.21795	1.74661
ENSG00000186469	172.654	145.2	0	0	9.486	2.07406e-09	3.27303e-08	GNG2	14	51826195	51979342	+	6379	protein_coding	G protein subunit gamma 2 [Source:HGNC Symbol;Acc:HGNC:4404]	-	226	170	0	0	0.998303	0.835639	0	0
ENSG00000131018	595.886	556.884	66.7958	55.3043	3.24158	2.07755e-09	3.27634e-08	SYNE1	6	152121684	152637801	-	46064	protein_coding	spectrin repeat containing nuclear envelope protein 1 [Source:HGNC Symbol;Acc:HGNC:17089]	CH	780	652	48	53	0.477133	0.443822	0.0526785	0.0439352
ENSG00000135333	1534.02	1537.41	119.676	211.826	3.20885	2.09187e-09	3.29673e-08	EPHA7	6	93240020	93419547	-	7456	protein_coding	EPH receptor A7 [Source:HGNC Symbol;Acc:HGNC:3390]	Pkinase_Tyr	2008	1800	86	203	7.58864	7.56988	0.583104	1.03965
ENSG00000138136	158.139	158.012	0	0	9.47808	2.09388e-09	3.29769e-08	LBX1	10	101226195	101229794	-	2900	protein_coding	ladybird homeobox 1 [Source:HGNC Symbol;Acc:HGNC:16960]	Homeobox	207	185	0	0	2.01131	2.00031	0	0
ENSG00000136014	167.306	133.242	0	3.13043	6.43443	2.16893e-09	3.40906e-08	USP44	12	95516560	95551490	-	5386	protein_coding	ubiquitin specific peptidase 44 [Source:HGNC Symbol;Acc:HGNC:20064]	UCH	219	156	0	3	1.14574	0.908199	0	0.0212693
ENSG00000101298	267.385	265.63	25.0484	11.4783	3.88931	2.27484e-09	3.56839e-08	SNPH	20	1266316	1309328	+	5574	protein_coding	syntaphilin [Source:HGNC Symbol;Acc:HGNC:15931]	-	350	311	18	11	1.76932	1.74951	0.163252	0.0753572
ENSG00000134198	138.276	134.95	4.17474	4.17391	5.03245	2.28868e-09	3.58773e-08	TSPAN2	1	115048011	115089500	-	3410	protein_coding	tetraspanin 2 [Source:HGNC Symbol;Acc:HGNC:20659]	Tetraspannin	181	158	3	4	1.49565	1.45287	0.0444755	0.0447924
ENSG00000198088	386.562	380.936	22.2653	41.7391	3.57151	2.38718e-09	3.73223e-08	NUP62CL	X	107123427	107206433	-	1867	protein_coding	nucleoporin 62 C-terminal like [Source:HGNC Symbol;Acc:HGNC:25960]	-	506	446	16	40	7.63682	7.49054	0.433241	0.818115
ENSG00000196549	272.732	290.4	6.95789	25.0435	4.10466	2.40476e-09	3.75473e-08	MME	3	155024124	155183729	+	9620	protein_coding	membrane metalloendopeptidase [Source:HGNC Symbol;Acc:HGNC:7154]	-	357	340	5	24	1.04568	1.10822	0.0262754	0.0952654
ENSG00000125703	1248.3	1303.38	48.7053	153.391	3.65146	2.52457e-09	3.9314e-08	ATG4C	1	62784135	62865513	+	3110	protein_coding	autophagy related 4C cysteine peptidase [Source:HGNC Symbol;Acc:HGNC:16040]	-	1634	1526	35	147	14.8046	15.3857	0.568933	1.80491
ENSG00000099954	1094.75	1067.65	143.333	114.783	3.06818	2.5932e-09	4.03561e-08	CECR2	22	17359949	17558149	+	10759	protein_coding	CECR2, histone acetyl-lysine reader [Source:HGNC Symbol;Acc:HGNC:1840]	Bromodomain	1433	1250	103	110	3.75302	3.64301	0.483971	0.390409
ENSG00000122863	957.238	867.782	119.676	58.4348	3.36319	2.6529e-09	4.12037e-08	CHST3	10	71964365	72013564	+	6970	protein_coding	carbohydrate sulfotransferase 3 [Source:HGNC Symbol;Acc:HGNC:1971]	Sulfotransfer_1	1253	1016	86	56	5.06553	4.57071	0.623763	0.306799
ENSG00000172733	145.916	158.866	0	0	9.42515	2.69954e-09	4.18455e-08	PURG	8	30995802	31033715	-	3771	protein_coding	purine rich element binding protein G [Source:HGNC Symbol;Acc:HGNC:17930]	-	191	186	0	0	1.42719	1.5466	0	0
ENSG00000123685	156.611	146.908	0	0	9.41932	2.76684e-09	4.27862e-08	BATF3	1	212686418	212699985	-	2713	protein_coding	basic leucine zipper ATF-like transcription factor 3 [Source:HGNC Symbol;Acc:HGNC:28915]	bZIP_1	205	172	0	0	2.12917	1.98793	0	0
ENSG00000145248	144.388	141.783	0	5.21739	5.64755	2.81742e-09	4.3473e-08	SLC10A4	4	48483343	48489196	+	1790	protein_coding	solute carrier family 10 member 4 [Source:HGNC Symbol;Acc:HGNC:22980]	-	189	166	0	5	2.97519	2.90789	0	0.106663
ENSG00000181433	152.791	148.616	0	0	9.40921	2.8918e-09	4.45334e-08	SAGE1	X	135889205	135913061	+	2953	protein_coding	sarcoma antigen 1 [Source:HGNC Symbol;Acc:HGNC:30369]	-	200	174	0	0	1.90842	1.8476	0	0
ENSG00000143248	168.834	172.532	0	2.08696	7.18935	3.00606e-09	4.62628e-08	RGS5	1	163111121	163321791	-	6821	protein_coding	regulator of G protein signaling 5 [Source:HGNC Symbol;Acc:HGNC:10001]	-	221	202	0	2	0.912958	0.928594	0	0.0111965
ENSG00000188452	161.959	128.972	6.95789	4.17391	4.73603	3.10103e-09	4.76002e-08	CERKL	2	181536676	181680665	-	4765	protein_coding	ceramide kinase like [Source:HGNC Symbol;Acc:HGNC:21699]	-	212	151	5	4	1.25366	0.993657	0.053047	0.032055
ENSG00000166165	34873.9	35164	4242.92	1147.83	3.69986	3.2279e-09	4.94512e-08	CKB	14	103519659	103523111	-	2669	protein_coding	creatine kinase B [Source:HGNC Symbol;Acc:HGNC:1991]	-	45649	41170	3049	1100	481.936	483.676	57.7514	15.7378
ENSG00000009709	151.263	154.595	6.95789	0	5.59164	3.23933e-09	4.9562e-08	PAX7	1	18631006	18748866	+	6313	protein_coding	paired box 7 [Source:HGNC Symbol;Acc:HGNC:8621]	PAX	198	181	5	0	0.883763	0.899012	0.0400394	0
ENSG00000197860	1045.86	1046.29	23.6568	110.609	3.95108	3.30214e-09	5.04903e-08	SGTB	5	65665928	65723035	-	5748	protein_coding	small glutamine rich tetratricopeptide repeat containing beta [Source:HGNC Symbol;Acc:HGNC:23567]	TPR_1	1369	1225	17	106	6.71109	6.68255	0.149515	0.704187
ENSG00000231764	162.723	134.096	0	0	9.38725	3.31362e-09	5.0633e-08	DLX6-AS1	7	96955141	97014065	-	16633	antisense	DLX6 antisense RNA 1 [Source:HGNC Symbol;Acc:HGNC:37151]	-	213	157	0	0	0.360841	0.295973	0	0
ENSG00000164616	168.07	129.826	0	0	9.39254	3.3208e-09	5.07098e-08	FBXL21	5	135930317	135951591	+	3872	transcribed_unitary_pseudogene	F-box and leucine rich repeat protein 21 (gene/pseudogene) [Source:HGNC Symbol;Acc:HGNC:13600]	-	220	152	0	0	1.60101	1.23092	0	0
novel.173	127.581	147.762	2.78316	1.04348	6.24259	3.43157e-09	5.23401e-08	-	6	117658681	117675347	-	1201	-	-	-	167	173	2	1	3.91814	4.51675	0.0841862	0.0317948
ENSG00000085563	136.748	140.075	0	4.17391	5.91203	3.43199e-09	5.23401e-08	ABCB1	7	87503633	87713323	-	5806	protein_coding	ATP binding cassette subfamily B member 1 [Source:HGNC Symbol;Acc:HGNC:40]	ABC_membrane	179	164	0	4	0.868725	0.885706	0	0.0263076
ENSG00000215417	514.907	550.051	5.56632	45.913	4.34433	3.57751e-09	5.44186e-08	MIR17HG	13	91347820	91354579	+	3492	processed_transcript	miR-17-92a-1 cluster host gene [Source:HGNC Symbol;Acc:HGNC:23564]	-	674	644	4	44	5.43866	5.78275	0.0579081	0.481146
ENSG00000138646	1029.81	1048	62.621	138.783	3.3611	3.66235e-09	5.55988e-08	HERC5	4	88457117	88506163	+	4766	protein_coding	HECT and RLD domain containing E3 ubiquitin protein ligase 5 [Source:HGNC Symbol;Acc:HGNC:24368]	HECT	1348	1227	45	133	7.96971	8.07259	0.477323	1.06561
ENSG00000151689	290.303	303.211	23.6568	28.1739	3.51302	3.91915e-09	5.91582e-08	INPP1	2	190343470	190371665	+	3676	protein_coding	inositol polyphosphate-1-phosphatase [Source:HGNC Symbol;Acc:HGNC:6071]	-	380	355	17	27	2.91283	3.02814	0.233791	0.28047
ENSG00000187140	186.405	186.197	8.34947	13.5652	4.06878	4.08756e-09	6.15036e-08	FOXD3	1	63323041	63325126	+	2086	protein_coding	forkhead box D3 [Source:HGNC Symbol;Acc:HGNC:3804]	Fork_head	244	218	6	13	3.29596	3.27691	0.145409	0.237973
ENSG00000260230	158.139	128.972	0	0	9.33928	4.15632e-09	6.24189e-08	FRRS1L	9	109130293	109167295	-	15559	protein_coding	ferric chelate reductase 1 like [Source:HGNC Symbol;Acc:HGNC:1362]	-	207	151	0	0	0.374882	0.304311	0	0
ENSG00000186280	274.26	246.84	19.4821	22.9565	3.61358	4.24324e-09	6.36028e-08	KDM4D	11	94973681	94999518	+	2978	protein_coding	lysine demethylase 4D [Source:HGNC Symbol;Acc:HGNC:25498]	JmjC	359	289	14	22	3.39685	3.04296	0.237661	0.282096
ENSG00000270641	291.067	266.484	1.39158	0	8.85201	4.61402e-09	6.87676e-08	TSIX	X	73792205	73829231	+	37027	lincRNA	TSIX transcript, XIST antisense RNA [Source:HGNC Symbol;Acc:HGNC:12377]	rve	381	312	1	0	0.289943	0.264216	0.00136532	0
ENSG00000110675	285.72	264.776	0	1.04348	8.84914	5.048e-09	7.49046e-08	ELMOD1	11	107591091	107666779	+	5856	protein_coding	ELMO domain containing 1 [Source:HGNC Symbol;Acc:HGNC:25334]	-	374	310	0	1	1.7996	1.6599	0	0.00652075
ENSG00000243943	964.877	950.632	73.7537	133.565	3.20317	5.16513e-09	7.65945e-08	ZNF512	2	27582969	27623215	+	4398	protein_coding	zinc finger protein 512 [Source:HGNC Symbol;Acc:HGNC:29380]	-	1263	1113	53	128	8.09198	7.93528	0.60922	1.11136
ENSG00000125355	280.372	265.63	0	1.04348	8.83731	5.30502e-09	7.85209e-08	TMEM255A	X	120258650	120311556	-	3858	protein_coding	transmembrane protein 255A [Source:HGNC Symbol;Acc:HGNC:26086]	-	367	311	0	1	2.68047	2.52767	0	0.00989775
ENSG00000140511	265.857	297.233	29.2232	12.5217	3.77501	5.64337e-09	8.32679e-08	HAPLN3	15	88877288	88895626	-	3524	protein_coding	hyaluronan and proteoglycan link protein 3 [Source:HGNC Symbol;Acc:HGNC:21446]	Xlink	348	348	21	12	2.78259	3.09646	0.301257	0.13003
ENSG00000081189	583.663	603.006	41.7474	77.2174	3.31071	5.65938e-09	8.3452e-08	MEF2C	5	88717117	88904257	-	11755	protein_coding	myocyte enhancer factor 2C [Source:HGNC Symbol;Acc:HGNC:6996]	SRF-TF	764	706	30	74	1.83137	1.88324	0.129019	0.240385
ENSG00000154639	916.748	971.13	19.4821	100.174	3.96778	5.78969e-09	8.53202e-08	CXADR	21	17512382	17593579	+	6682	protein_coding	CXADR, Ig-like cell adhesion molecule [Source:HGNC Symbol;Acc:HGNC:2559]	V-set	1200	1137	14	96	5.06036	5.33552	0.105919	0.54861
ENSG00000198879	963.349	993.338	123.851	124.174	2.97983	5.91751e-09	8.70952e-08	SFMBT2	10	7158624	7411486	-	9953	protein_coding	Scm like with four mbt domains 2 [Source:HGNC Symbol;Acc:HGNC:20256]	MBT	1261	1163	89	119	3.56999	3.66394	0.452053	0.456554
ENSG00000150051	262.801	263.922	15.3074	26.0869	3.65521	5.92802e-09	8.71955e-08	MKX	10	27672875	27746060	-	4106	protein_coding	mohawk homeobox [Source:HGNC Symbol;Acc:HGNC:23729]	Coprinus_mating	344	309	11	25	2.36073	2.35973	0.135434	0.232498
ENSG00000213626	137.512	133.242	0	0	9.25448	5.94069e-09	8.73274e-08	LBH	2	30231531	30323730	+	4535	protein_coding	limb bud and heart development [Source:HGNC Symbol;Acc:HGNC:29532]	-	180	156	0	0	1.11841	1.07862	0	0
ENSG00000137285	740.274	697.813	89.061	29.2174	3.61503	5.9454e-09	8.73422e-08	TUBB2B	6	3224261	3231730	-	2194	protein_coding	tubulin beta 2B class IIb [Source:HGNC Symbol;Acc:HGNC:30829]	Tubulin	969	817	64	28	12.445	11.6764	1.47468	0.487327
ENSG00000101638	117.649	146.908	5.56632	1.04348	5.41608	6.02778e-09	8.84973e-08	ST8SIA5	18	46667821	46759257	-	15789	protein_coding	ST8 alpha-N-acetyl-neuraminide alpha-2,8-sialyltransferase 5 [Source:HGNC Symbol;Acc:HGNC:17827]	Glyco_transf_29	154	172	4	1	0.274835	0.341583	0.0128073	0.00241849
ENSG00000173706	851.812	842.159	109.935	100.174	3.01203	6.07919e-09	8.91413e-08	HEG1	3	124965710	125055958	-	9925	protein_coding	heart development protein with EGF like domains 1 [Source:HGNC Symbol;Acc:HGNC:29227]	EGF_CA	1115	986	79	96	3.16556	3.11508	0.402393	0.369351
ENSG00000254202	126.817	143.492	0	0	9.25194	6.08334e-09	8.91468e-08	AC015522.1	8	83912713	84140283	+	640	lincRNA	-	-	166	168	0	0	7.30861	8.23099	0	0
ENSG00000075213	159.667	146.054	1.39158	1.04348	6.99717	6.22247e-09	9.10726e-08	SEMA3A	7	83955777	84492724	-	9371	protein_coding	semaphorin 3A [Source:HGNC Symbol;Acc:HGNC:10723]	-	209	171	1	1	0.628444	0.57218	0.00539471	0.00407486
ENSG00000206432	140.568	128.117	0	0	9.24349	6.29235e-09	9.19772e-08	TMEM200C	18	5882072	5895955	-	10638	protein_coding	transmembrane protein 200C [Source:HGNC Symbol;Acc:HGNC:37208]	-	184	150	0	0	0.487376	0.442134	0	0
ENSG00000164093	651.655	644.858	82.1032	70.9565	3.08415	6.29597e-09	9.19772e-08	PITX2	4	110617423	110642123	-	5787	protein_coding	paired like homeodomain 2 [Source:HGNC Symbol;Acc:HGNC:9005]	Homeobox	853	755	59	68	4.15338	4.09087	0.515409	0.448698
ENSG00000164398	165.779	139.221	1.39158	1.04348	6.99383	6.56102e-09	9.56718e-08	ACSL6	5	131949973	132012243	-	13013	protein_coding	acyl-CoA synthetase long chain family member 6 [Source:HGNC Symbol;Acc:HGNC:16496]	AMP-binding	217	163	1	1	0.469882	0.392765	0.00388487	0.00293441
ENSG00000180773	1384.29	1488.73	41.7474	170.087	3.75465	6.58757e-09	9.58222e-08	SLC36A4	11	93144171	93197964	-	9685	protein_coding	solute carrier family 36 member 4 [Source:HGNC Symbol;Acc:HGNC:19660]	Aa_trans	1812	1743	30	163	5.27187	5.64313	0.156594	0.642668
ENSG00000104313	259.745	258.797	0	1.04348	8.76289	7.3494e-09	1.06314e-07	EYA1	8	71197433	71592025	-	9418	protein_coding	EYA transcriptional coactivator and phosphatase 1 [Source:HGNC Symbol;Acc:HGNC:3519]	-	340	303	0	1	1.01725	1.0088	0	0.00405453
ENSG00000153157	135.984	129.826	0	3.13043	6.25809	7.38374e-09	1.06745e-07	SYCP2L	6	10886831	10979320	+	3962	protein_coding	synaptonemal complex protein 2 like [Source:HGNC Symbol;Acc:HGNC:21537]	-	178	152	0	3	1.26594	1.20296	0	0.0289138
ENSG00000143674	2797.61	2769.9	389.642	390.261	2.83566	7.68383e-09	1.10948e-07	MAP3K21	1	233327768	233385148	+	7916	protein_coding	mitogen-activated protein kinase kinase kinase 21 [Source:HGNC Symbol;Acc:HGNC:29798]	Pkinase_Tyr	3662	3243	280	374	13.0352	12.8459	1.78816	1.80412
ENSG00000274026	141.332	119.576	0	0	9.20119	7.77677e-09	1.12221e-07	FAM27E3	9	67717411	67719178	-	1593	transcribed_processed_pseudogene	family with sequence similarity 27 member E3 [Source:HGNC Symbol;Acc:HGNC:28655]	-	185	140	0	0	3.27237	2.75572	0	0
ENSG00000138193	483.584	586.778	20.8737	63.6522	3.64808	7.83336e-09	1.129e-07	PLCE1	10	94030812	94332823	+	12930	protein_coding	phospholipase C epsilon 1 [Source:HGNC Symbol;Acc:HGNC:17175]	PI-PLC-X	633	687	15	61	1.37947	1.66602	0.0586471	0.180148
ENSG00000118276	1195.59	1268.36	25.0484	133.565	3.94814	8.01005e-09	1.15306e-07	B4GALT6	18	31622247	31685836	-	5306	protein_coding	beta-1,4-galactosyltransferase 6 [Source:HGNC Symbol;Acc:HGNC:929]	-	1565	1485	18	128	8.311	8.7757	0.171498	0.921174
ENSG00000116741	262.801	248.548	8.34947	25.0435	3.90813	8.17358e-09	1.17516e-07	RGS2	1	192809039	192812283	+	2096	protein_coding	regulator of G protein signaling 2 [Source:HGNC Symbol;Acc:HGNC:9998]	RGS	344	291	6	24	4.62459	4.35336	0.144715	0.437239
ENSG00000178947	260.509	256.235	15.3074	26.0869	3.62768	8.18639e-09	1.17629e-07	SMIM10L2A	X	135421943	135428074	+	5230	protein_coding	small integral membrane protein 10 like 2A [Source:HGNC Symbol;Acc:HGNC:34499]	-	341	300	11	25	1.83721	1.79863	0.106327	0.182531
ENSG00000250682	135.22	122.993	0	0	9.18613	8.2053e-09	1.17829e-07	LINC00491	5	102609156	102671559	-	1227	lincRNA	long intergenic non-protein coding RNA 491 [Source:HGNC Symbol;Acc:HGNC:43428]	-	177	144	0	0	4.06476	3.67994	0	0
ENSG00000146350	783.819	758.455	18.0905	85.5652	3.88161	8.21503e-09	1.17897e-07	TBC1D32	6	121079494	121334745	-	6912	protein_coding	TBC1 domain family member 32 [Source:HGNC Symbol;Acc:HGNC:21485]	-	1026	888	13	82	4.18264	4.02839	0.0950809	0.453011
ENSG00000157404	275.788	278.442	16.6989	29.2174	3.57945	8.61713e-09	1.23293e-07	KIT	4	54657918	54740715	+	5563	protein_coding	KIT proto-oncogene receptor tyrosine kinase [Source:HGNC Symbol;Acc:HGNC:6342]	Pkinase_Tyr	361	326	12	28	1.82854	1.83752	0.10905	0.192198
ENSG00000127252	131.401	124.701	0	0	9.17424	8.62286e-09	1.233e-07	HRASLS	3	193241125	193277738	+	1169	protein_coding	HRAS like suppressor [Source:HGNC Symbol;Acc:HGNC:14922]	-	172	146	0	0	4.14591	3.91616	0	0
ENSG00000120075	244.466	257.943	1.39158	0	8.70145	8.92757e-09	1.27272e-07	HOXB5	17	48591257	48593961	-	2041	protein_coding	homeobox B5 [Source:HGNC Symbol;Acc:HGNC:5116]	Homeobox	320	302	1	0	4.41787	4.63966	0.0247691	0
ENSG00000142700	113.83	141.783	0	0	9.17118	9.08507e-09	1.29361e-07	DMRTA2	1	50417550	50423500	-	3225	protein_coding	DMRT like family A2 [Source:HGNC Symbol;Acc:HGNC:13908]	DM	149	166	0	0	1.30186	1.61399	0	0
ENSG00000077943	140.568	114.452	0	0	9.1683	9.16649e-09	1.30363e-07	ITGA8	10	15513949	15720125	-	7528	protein_coding	integrin subunit alpha 8 [Source:HGNC Symbol;Acc:HGNC:6144]	FG-GAP	184	134	0	0	0.688723	0.558146	0	0
ENSG00000179314	116.885	137.513	0	0	9.16437	9.1996e-09	1.30755e-07	WSCD1	17	6057807	6124427	+	7136	protein_coding	WSC domain containing 1 [Source:HGNC Symbol;Acc:HGNC:29060]	Sulfotransfer_1	153	161	0	0	0.604148	0.707447	0	0
ENSG00000186684	116.121	138.367	0	0	9.16487	9.21087e-09	1.30836e-07	CYP27C1	2	127184120	127220078	-	4491	protein_coding	cytochrome P450 family 27 subfamily C member 1 [Source:HGNC Symbol;Acc:HGNC:33480]	p450	152	162	0	0	0.953689	1.13108	0	0
ENSG00000081985	119.941	130.68	2.78316	1.04348	6.10636	9.24067e-09	1.31181e-07	IL12RB2	1	67307364	67396900	+	4233	protein_coding	interleukin 12 receptor subunit beta 2 [Source:HGNC Symbol;Acc:HGNC:5972]	fn3	157	153	2	1	1.0451	1.13335	0.0238856	0.00902091
ENSG00000126562	246.758	268.193	25.0484	19.8261	3.52673	9.27151e-09	1.3154e-07	WNK4	17	42780678	42796936	+	5089	protein_coding	WNK lysine deficient protein kinase 4 [Source:HGNC Symbol;Acc:HGNC:14544]	Pkinase	323	314	18	19	1.78845	1.93473	0.178811	0.142567
ENSG00000188729	117.649	133.242	0	0	9.14439	9.99704e-09	1.41748e-07	OSTN	3	191199241	191265615	+	3219	protein_coding	osteocrin [Source:HGNC Symbol;Acc:HGNC:29961]	-	154	156	0	0	1.34805	1.51959	0	0
ENSG00000143815	10167.5	10051.2	353.461	1320	3.59387	1.01198e-08	1.43402e-07	LBR	1	225401502	225428925	-	5257	protein_coding	lamin B receptor [Source:HGNC Symbol;Acc:HGNC:6518]	-	13309	11768	254	1265	71.3368	70.1919	2.44258	9.18864
ENSG00000123612	147.444	155.449	8.34947	8.34782	4.18107	1.03647e-08	1.46608e-07	ACVR1C	2	157526767	157629005	-	9195	protein_coding	activin A receptor type 1C [Source:HGNC Symbol;Acc:HGNC:18123]	Pkinase_Tyr	193	182	6	8	0.591442	0.620644	0.0329878	0.0332229
ENSG00000160469	425.524	376.665	47.3137	38.6087	3.22648	1.10689e-08	1.56382e-07	BRSK1	19	55282072	55312533	+	3841	protein_coding	BR serine/threonine kinase 1 [Source:HGNC Symbol;Acc:HGNC:18994]	Pkinase	557	441	34	37	4.08618	3.60012	0.447495	0.367838
ENSG00000048740	127.581	117.868	0	0	9.11298	1.14687e-08	1.61837e-07	CELF2	10	10798397	11336675	+	10978	protein_coding	CUGBP Elav-like family member 2 [Source:HGNC Symbol;Acc:HGNC:2550]	RRM_1	167	138	0	0	0.428647	0.394165	0	0
ENSG00000142892	3158.2	3162.79	140.549	439.304	3.44387	1.1637e-08	1.64114e-07	PIGK	1	77088990	77219430	-	5513	protein_coding	phosphatidylinositol glycan anchor biosynthesis class K [Source:HGNC Symbol;Acc:HGNC:8965]	-	4134	3703	101	421	21.1295	21.0615	0.926162	2.91604
ENSG00000184271	264.329	254.527	26.44	7.30435	3.97505	1.20123e-08	1.69003e-07	POU6F1	12	51186936	51217708	-	6048	protein_coding	POU class 6 homeobox 1 [Source:HGNC Symbol;Acc:HGNC:9224]	Pou	346	298	19	7	1.61202	1.54499	0.158816	0.0441962
ENSG00000179673	120.705	134.95	2.78316	6.26087	4.77725	1.22566e-08	1.72235e-07	RPRML	17	46978156	46979248	-	1093	protein_coding	reprimo like [Source:HGNC Symbol;Acc:HGNC:32422]	-	158	158	2	6	4.07327	4.53273	0.0925046	0.209619
ENSG00000064225	220.783	258.797	0	1.04348	8.65025	1.23243e-08	1.73082e-07	ST3GAL6	3	98732236	98821201	+	6288	protein_coding	ST3 beta-galactoside alpha-2,3-sialyltransferase 6 [Source:HGNC Symbol;Acc:HGNC:18080]	Glyco_transf_29	289	303	0	1	1.29507	1.51096	0	0.00607276
ENSG00000133104	4373.65	4508.88	254.659	661.565	3.27568	1.23322e-08	1.73091e-07	SPART	13	36301638	36370180	-	6387	protein_coding	spartin [Source:HGNC Symbol;Acc:HGNC:18514]	-	5725	5279	183	634	25.2572	25.9166	1.44846	3.79045
ENSG00000197291	158.903	129.826	2.78316	0	6.87794	1.26016e-08	1.76557e-07	RAMP2-AS1	17	42753914	42761257	-	4168	lincRNA	RAMP2 antisense RNA 1 [Source:HGNC Symbol;Acc:HGNC:44358]	-	208	152	2	0	1.40618	1.14351	0.0242581	0
ENSG00000165521	367.463	415.101	15.3074	45.913	3.65755	1.28244e-08	1.79359e-07	EML5	14	88612431	88792752	-	11000	protein_coding	echinoderm microtubule associated protein like 5 [Source:HGNC Symbol;Acc:HGNC:18197]	-	481	486	11	44	1.23214	1.38537	0.0505538	0.152742
ENSG00000196972	228.423	205.842	20.8737	6.26087	4.03644	1.37794e-08	1.91807e-07	SMIM10L2B	X	135094987	135098634	-	2737	protein_coding	small integral membrane protein 10 like 2B [Source:HGNC Symbol;Acc:HGNC:34500]	-	299	241	15	6	3.07824	2.76099	0.277058	0.0837096
ENSG00000164651	103.134	137.513	0	0	9.08405	1.39413e-08	1.93945e-07	SP8	7	20782283	20786886	-	3718	protein_coding	Sp8 transcription factor [Source:HGNC Symbol;Acc:HGNC:19196]	zf-C2H2	135	161	0	0	1.02313	1.35781	0	0
ENSG00000139515	142.096	99.0775	0	0	9.08794	1.4223e-08	1.97749e-07	PDX1	13	27920020	27926231	+	2501	protein_coding	pancreatic and duodenal homeobox 1 [Source:HGNC Symbol;Acc:HGNC:6107]	Homeobox	186	116	0	0	2.09559	1.45434	0	0
ENSG00000034053	116.885	120.43	0	0	9.06424	1.4283e-08	1.98466e-07	APBA2	15	28884483	29118315	+	6869	protein_coding	amyloid beta precursor protein binding family A member 2 [Source:HGNC Symbol;Acc:HGNC:579]	PID	153	141	0	0	0.627631	0.643648	0	0
ENSG00000000003	3553.16	3627.43	185.08	524.869	3.3363	1.46002e-08	2.02634e-07	TSPAN6	X	100627109	100639991	-	4535	protein_coding	tetraspanin 6 [Source:HGNC Symbol;Acc:HGNC:11858]	Tetraspannin	4651	4247	133	503	28.8985	29.3648	1.48261	4.23535
ENSG00000261377	111.538	124.701	0	0	9.05758	1.48607e-08	2.06129e-07	PDCD6IPP2	15	28789664	28859007	+	5244	transcribed_unprocessed_pseudogene	PDCD6IP pseudogene 2 [Source:HGNC Symbol;Acc:HGNC:49873]	-	146	146	0	0	0.784507	0.872997	0	0
ENSG00000178202	4858.76	4942.77	267.183	730.435	3.29502	1.51582e-08	2.10008e-07	KDELC2	11	108472105	108498432	-	4993	protein_coding	KDEL motif containing 2 [Source:HGNC Symbol;Acc:HGNC:28496]	-	6360	5787	192	700	35.8924	36.3425	1.94399	5.35347
ENSG00000197705	122.997	111.889	0	0	9.04954	1.53811e-08	2.12847e-07	KLHL14	18	32672671	32773062	-	4992	protein_coding	kelch like family member 14 [Source:HGNC Symbol;Acc:HGNC:29266]	Kelch_1	161	131	0	0	0.908778	0.822847	0	0
ENSG00000120318	273.496	255.381	27.8316	20.8696	3.4483	1.54592e-08	2.13803e-07	ARAP3	5	141653401	141682221	-	6186	protein_coding	ArfGAP with RhoGAP domain, ankyrin repeat and PH domain 3 [Source:HGNC Symbol;Acc:HGNC:24097]	RhoGAP	358	299	20	20	1.63072	1.5156	0.163446	0.123458
ENSG00000146233	112.302	122.139	0	0	9.04659	1.55626e-08	2.14936e-07	CYP39A1	6	46549580	46652830	-	3111	protein_coding	cytochrome P450 family 39 subfamily A member 1 [Source:HGNC Symbol;Acc:HGNC:17449]	p450	147	143	0	0	1.33145	1.44131	0	0
ENSG00000173482	445.387	403.143	55.6632	31.3043	3.29571	1.59485e-08	2.19798e-07	PTPRM	18	7566782	8406861	+	9900	protein_coding	protein tyrosine phosphatase, receptor type M [Source:HGNC Symbol;Acc:HGNC:9675]	Y_phosphatase	583	472	40	30	1.65936	1.49496	0.204258	0.115714
ENSG00000188582	134.456	99.0775	0	0	9.04145	1.70888e-08	2.34963e-07	PAQR9	3	142949164	142963682	-	4169	protein_coding	progestin and adipoQ receptor family member 9 [Source:HGNC Symbol;Acc:HGNC:30131]	-	176	116	0	0	1.18956	0.872466	0	0
ENSG00000104332	124.525	153.741	2.78316	0	6.82373	1.76336e-08	2.42031e-07	SFRP1	8	41261958	41309497	-	4761	protein_coding	secreted frizzled related protein 1 [Source:HGNC Symbol;Acc:HGNC:10776]	Fz	163	180	2	0	0.964708	1.18549	0.0212366	0
ENSG00000172350	129.873	111.889	5.56632	1.04348	5.28551	1.77321e-08	2.43242e-07	ABCG4	11	119149012	119162653	+	6271	protein_coding	ATP binding cassette subfamily G member 4 [Source:HGNC Symbol;Acc:HGNC:13884]	ABC2_membrane	170	131	4	1	0.763868	0.655024	0.0322461	0.00608922
ENSG00000137760	911.4	925.008	84.8863	139.826	3.02696	1.95918e-08	2.6729e-07	ALKBH8	11	107502726	107565746	-	4506	protein_coding	alkB homolog 8, tRNA methyltransferase [Source:HGNC Symbol;Acc:HGNC:25189]	Methyltransf_11	1193	1083	61	134	7.46029	7.53633	0.684372	1.13557
ENSG00000130413	202.448	243.423	0	1.04348	8.54521	1.95984e-08	2.6729e-07	STK33	11	8391868	8594289	-	7599	protein_coding	serine/threonine kinase 33 [Source:HGNC Symbol;Acc:HGNC:14568]	Pkinase	265	285	0	1	0.982643	1.17601	0	0.00502507
novel.52	105.426	120.43	0	0	8.99271	2.00799e-08	2.73383e-07	-	13	83090711	83102374	-	1150	-	-	-	138	141	0	0	3.38133	3.84454	0	0
ENSG00000111249	103.898	126.409	4.17474	3.13043	4.9965	2.01155e-08	2.73709e-07	CUX2	12	111034024	111350554	+	7648	protein_coding	cut like homeobox 2 [Source:HGNC Symbol;Acc:HGNC:19347]	CUT	136	148	3	3	0.501069	0.606787	0.0198302	0.0149786
ENSG00000187240	3014.57	2850.19	66.7958	349.565	3.81253	2.02978e-08	2.75629e-07	DYNC2H1	11	103109431	103479863	+	14284	protein_coding	dynein cytoplasmic 2 heavy chain 1 [Source:HGNC Symbol;Acc:HGNC:2962]	Dynein_heavy	3946	3337	48	335	7.78419	7.32536	0.169881	0.895558
ENSG00000274911	106.19	118.722	0	0	8.98669	2.05563e-08	2.78104e-07	AL627230.2	9	67725890	67726544	+	655	unprocessed_pseudogene	-	-	139	139	0	0	5.97971	6.6542	0	0
ENSG00000198189	936.611	908.78	32.0063	120	3.59248	2.08131e-08	2.81418e-07	HSD17B11	4	87336610	87391386	-	2435	protein_coding	hydroxysteroid 17-beta dehydrogenase 11 [Source:HGNC Symbol;Acc:HGNC:22960]	adh_short	1226	1064	23	115	14.1872	13.7014	0.47751	1.80342
ENSG00000101017	107.718	116.16	0	0	8.98008	2.10767e-08	2.84493e-07	CD40	20	46118272	46129863	+	2527	protein_coding	CD40 molecule [Source:HGNC Symbol;Acc:HGNC:11919]	-	141	136	0	0	1.57225	1.68755	0	0
ENSG00000165124	127.581	120.43	5.56632	5.21739	4.52711	2.12914e-08	2.87228e-07	SVEP1	9	110365251	110579880	-	14190	protein_coding	sushi, von Willebrand factor type A, EGF and pentraxin domain containing 1 [Source:HGNC Symbol;Acc:HGNC:15985]	VWA	167	141	4	5	0.33162	0.311573	0.0142505	0.0134551
ENSG00000080493	204.74	178.51	13.9158	15.6522	3.69231	2.13128e-08	2.87352e-07	SLC4A4	4	71186757	71572087	+	9437	protein_coding	solute carrier family 4 member 4 [Source:HGNC Symbol;Acc:HGNC:11030]	Band_3_cyto	268	209	10	15	0.800216	0.69444	0.0535698	0.0606954
ENSG00000177108	382.742	398.872	51.4884	26.0869	3.34428	2.16434e-08	2.91476e-07	ZDHHC22	14	77131270	77142734	-	3862	protein_coding	zinc finger DHHC-type containing 22 [Source:HGNC Symbol;Acc:HGNC:20106]	-	501	467	37	25	3.65537	3.79164	0.484332	0.247188
ENSG00000102043	109.246	113.597	0	0	8.97345	2.16567e-08	2.91489e-07	MTMR8	X	64268081	64395431	-	2782	protein_coding	myotubularin related protein 8 [Source:HGNC Symbol;Acc:HGNC:16825]	-	143	133	0	0	1.44839	1.49905	0	0
ENSG00000198353	623.389	585.07	84.8863	65.7391	3.00706	2.2331e-08	3.00051e-07	HOXC4	12	54016931	54056030	+	2725	protein_coding	homeobox C4 [Source:HGNC Symbol;Acc:HGNC:5126]	Homeobox	816	685	61	63	8.43782	7.88219	1.13166	0.882821
ENSG00000135362	119.177	111.889	4.17474	4.17391	4.79071	2.39904e-08	3.21434e-07	PRR5L	11	36296288	36465204	+	6616	protein_coding	proline rich 5 like [Source:HGNC Symbol;Acc:HGNC:25878]	-	156	131	3	4	0.664409	0.620867	0.0229234	0.0230868
ENSG00000143469	209.324	218.654	0	1.04348	8.48623	2.45931e-08	3.29136e-07	SYT14	1	209938174	210171389	+	13926	protein_coding	synaptotagmin 14 [Source:HGNC Symbol;Acc:HGNC:23143]	C2	274	256	0	1	0.554409	0.576416	0	0.00274203
ENSG00000198157	2540.92	2429.11	11.1326	192	4.60621	2.48485e-08	3.32365e-07	HMGN5	X	81113701	81201942	-	2416	protein_coding	high mobility group nucleosome binding domain 5 [Source:HGNC Symbol;Acc:HGNC:8013]	-	3326	2844	8	184	38.7911	36.911	0.167397	2.90817
ENSG00000144061	223.075	207.55	9.74105	21.913	3.74248	2.49099e-08	3.32997e-07	NPHP1	2	110122311	110205066	-	11763	protein_coding	nephrocystin 1 [Source:HGNC Symbol;Acc:HGNC:7905]	SH3_1	292	243	7	21	0.699473	0.647755	0.0300839	0.0681711
ENSG00000164211	1127.6	1052.27	22.2653	126.261	3.86566	2.53527e-08	3.38534e-07	STARD4	5	111496033	111512590	-	5684	protein_coding	StAR related lipid transfer domain containing 4 [Source:HGNC Symbol;Acc:HGNC:18058]	START	1476	1232	16	121	7.3171	6.7964	0.142305	0.812887
ENSG00000227159	165.015	175.094	13.9158	2.08696	4.47339	2.62331e-08	3.49651e-07	DDX11L16	X	156025664	156027877	-	1306	unprocessed_pseudogene	DEAD/H-box helicase 11 like 16 [Source:HGNC Symbol;Acc:HGNC:37115]	-	216	205	10	2	4.66033	4.92191	0.387089	0.0584771
ENSG00000136274	245.994	206.696	23.6568	7.30435	3.9023	2.66963e-08	3.55068e-07	NACAD	7	45080438	45088914	-	4917	protein_coding	NAC alpha domain containing [Source:HGNC Symbol;Acc:HGNC:22196]	-	322	242	17	7	1.84528	1.54326	0.174784	0.0543622
ENSG00000154553	351.42	309.19	40.3558	29.2174	3.25371	2.69269e-08	3.57733e-07	PDLIM3	4	185500660	185535612	-	9117	protein_coding	PDZ and LIM domain 3 [Source:HGNC Symbol;Acc:HGNC:20767]	PDZ	460	362	29	28	1.42171	1.24503	0.160805	0.117275
ENSG00000204498	116.885	99.0775	0	0	8.92845	2.71291e-08	3.60216e-07	NFKBIL1	6	31546870	31558829	+	1779	protein_coding	NFKB inhibitor like 1 [Source:HGNC Symbol;Acc:HGNC:7800]	-	153	116	0	0	2.42338	2.04458	0	0
ENSG00000116329	108.482	114.452	1.39158	4.17391	5.2579	2.74761e-08	3.64609e-07	OPRD1	1	28812142	28871267	+	9345	protein_coding	opioid receptor delta 1 [Source:HGNC Symbol;Acc:HGNC:8153]	7tm_1	142	134	1	4	0.428169	0.449623	0.00540972	0.0163448
ENSG00000075891	110.774	122.139	5.56632	1.04348	5.231	2.74908e-08	3.64609e-07	PAX2	10	100735603	100829941	+	6243	protein_coding	paired box 2 [Source:HGNC Symbol;Acc:HGNC:8616]	PAX	145	143	4	1	0.654457	0.718233	0.0323907	0.00611654
ENSG00000185436	278.844	315.169	29.2232	32.3478	3.26785	2.82591e-08	3.74377e-07	IFNLR1	1	24154157	24187959	-	4923	protein_coding	interferon lambda receptor 1 [Source:HGNC Symbol;Acc:HGNC:18584]	-	365	369	21	31	2.08915	2.35028	0.215647	0.240453
ENSG00000136111	4494.36	4392.72	648.476	711.652	2.70782	2.84062e-08	3.76116e-07	TBC1D4	13	75284665	75482114	-	6658	protein_coding	TBC1 domain family member 4 [Source:HGNC Symbol;Acc:HGNC:19165]	TBC	5883	5143	466	682	24.8978	24.2212	3.53831	3.91146
ENSG00000113396	215.436	177.656	9.74105	18.7826	3.7639	2.84484e-08	3.76463e-07	SLC27A6	5	128538013	129033642	+	3493	protein_coding	solute carrier family 27 member 6 [Source:HGNC Symbol;Acc:HGNC:11000]	AMP-binding	282	208	7	18	2.27487	1.86718	0.10131	0.196776
ENSG00000136531	209.324	208.404	0	1.04348	8.45134	2.8537e-08	3.77423e-07	SCN2A	2	165194993	165392310	+	23695	protein_coding	sodium voltage-gated channel alpha subunit 2 [Source:HGNC Symbol;Acc:HGNC:10588]	Ion_trans	274	244	0	1	0.325837	0.322891	0	0.00161154
ENSG00000166352	340.725	368.124	15.3074	43.8261	3.56492	2.85875e-08	3.7788e-07	C11orf74	11	36594493	36659290	+	1474	protein_coding	chromosome 11 open reading frame 74 [Source:HGNC Symbol;Acc:HGNC:25142]	-	446	431	11	42	8.52597	9.16859	0.377267	1.08805
ENSG00000105137	1316.3	1364.02	217.086	118.956	2.99873	2.90927e-08	3.84343e-07	SYDE1	19	15107403	15114988	+	3965	protein_coding	synapse defective Rho GTPase homolog 1 [Source:HGNC Symbol;Acc:HGNC:25824]	RhoGAP	1723	1597	156	114	12.2447	12.6294	1.989	1.09789
ENSG00000105889	116.121	116.16	0	3.13043	6.06533	3.026e-08	3.99317e-07	STEAP1B	7	22419444	22632925	-	2316	protein_coding	STEAP family member 1B [Source:HGNC Symbol;Acc:HGNC:41907]	-	152	136	0	3	1.84932	1.84129	0	0.0494631
ENSG00000178919	97.7864	114.452	0	0	8.90295	3.03896e-08	4.00803e-07	FOXE1	9	97853254	97856715	+	3462	protein_coding	forkhead box E1 [Source:HGNC Symbol;Acc:HGNC:3806]	Fork_head	128	134	0	0	1.04181	1.21367	0	0
ENSG00000125813	124.525	89.6822	0	0	8.91687	3.04298e-08	4.01109e-07	PAX1	20	21705659	21718486	+	5855	protein_coding	paired box 1 [Source:HGNC Symbol;Acc:HGNC:8615]	PAX	163	105	0	0	0.784453	0.562322	0	0
ENSG00000166582	2017.61	2067.82	224.044	341.217	2.85207	3.09417e-08	4.0763e-07	CENPV	17	16342534	16353656	-	2880	protein_coding	centromere protein V [Source:HGNC Symbol;Acc:HGNC:29920]	-	2641	2421	161	327	25.8394	26.3588	2.8261	4.33565
ENSG00000182463	187.169	199.009	9.74105	18.7826	3.73799	3.28683e-08	4.32528e-07	TSHZ2	20	52972407	53495330	+	12581	protein_coding	teashirt zinc finger homeobox 2 [Source:HGNC Symbol;Acc:HGNC:13010]	-	245	233	7	18	0.548728	0.580715	0.0281279	0.0546331
ENSG00000134548	103.898	104.202	0	0	8.87474	3.3921e-08	4.4514e-07	SPX	12	21526307	21537377	+	3359	protein_coding	spexin hormone [Source:HGNC Symbol;Acc:HGNC:28139]	-	136	122	0	0	1.14087	1.13887	0	0
ENSG00000137558	213.908	192.176	0	1.04348	8.41071	3.43109e-08	4.50007e-07	PI15	8	74824537	74855029	+	7156	protein_coding	peptidase inhibitor 15 [Source:HGNC Symbol;Acc:HGNC:8946]	SCP	280	225	0	1	1.10254	0.985904	0	0.00533616
ENSG00000187987	93.9667	113.597	0	0	8.87078	3.54617e-08	4.64584e-07	ZSCAN23	6	28431930	28443502	-	3283	protein_coding	zinc finger and SCAN domain containing 23 [Source:HGNC Symbol;Acc:HGNC:21193]	SCAN	123	133	0	0	1.0557	1.27029	0	0
ENSG00000102230	213.144	189.614	1.39158	0	8.38203	3.59882e-08	4.70959e-07	PCYT1B	X	24558087	24672677	-	5555	protein_coding	phosphate cytidylyltransferase 1, choline, beta [Source:HGNC Symbol;Acc:HGNC:8755]	CTP_transf_2	279	222	1	0	1.41523	1.25312	0.00910059	0
ENSG00000168779	213.908	231.466	12.5242	24	3.59002	3.67224e-08	4.80301e-07	SHOX2	3	158095954	158106503	-	5045	protein_coding	short stature homeobox 2 [Source:HGNC Symbol;Acc:HGNC:10854]	Homeobox	280	271	9	23	1.56388	1.68434	0.0901852	0.174087
ENSG00000139292	103.898	101.64	0	0	8.8569	3.68e-08	4.80783e-07	LGR5	12	71439770	71586310	+	5251	protein_coding	leucine rich repeat containing G protein-coupled receptor 5 [Source:HGNC Symbol;Acc:HGNC:4504]	-	136	119	0	0	0.729799	0.710604	0	0
ENSG00000121005	761.665	694.397	97.4105	101.217	2.87361	3.77206e-08	4.91994e-07	CRISPLD1	8	74984515	75034558	+	4543	protein_coding	cysteine rich secretory protein LCCL domain containing 1 [Source:HGNC Symbol;Acc:HGNC:18206]	LCCL	997	813	70	97	6.18385	5.61139	0.778949	0.815319
ENSG00000173320	714.299	721.728	98.8021	98.0869	2.86669	3.88467e-08	5.06401e-07	STOX2	4	183797692	184023526	+	11316	protein_coding	storkhead box 2 [Source:HGNC Symbol;Acc:HGNC:25450]	-	935	845	71	94	2.32823	2.34146	0.31719	0.3172
ENSG00000154864	99.3143	118.722	1.39158	2.08696	5.93885	3.95864e-08	5.15475e-07	PIEZO2	18	10666483	11148762	-	14796	protein_coding	piezo type mechanosensitive ion channel component 2 [Source:HGNC Symbol;Acc:HGNC:26270]	-	130	139	1	2	0.247574	0.294573	0.00341672	0.0051616
ENSG00000140090	184.114	211.821	1.39158	0	8.35709	4.02238e-08	5.23198e-07	SLC24A4	14	92322581	92501483	+	14412	protein_coding	solute carrier family 24 member 4 [Source:HGNC Symbol;Acc:HGNC:10978]	Na_Ca_ex	241	248	1	0	0.471193	0.539573	0.00350776	0
ENSG00000006468	95.4946	105.91	0	0	8.82743	4.23726e-08	5.49332e-07	ETV1	7	13891228	13991425	-	9616	protein_coding	ETS variant 1 [Source:HGNC Symbol;Acc:HGNC:3490]	ETS_PEA3_N	125	124	0	0	0.366287	0.404343	0	0
ENSG00000079435	125.289	129.826	8.34947	1.04348	4.85223	4.31687e-08	5.59345e-07	LIPE	19	42401507	42427426	-	5206	protein_coding	lipase E, hormone sensitive type [Source:HGNC Symbol;Acc:HGNC:6621]	Abhydrolase_3	164	152	6	1	0.887659	0.915508	0.0582641	0.00733491
ENSG00000129159	532.478	485.138	75.1453	39.6522	3.15611	4.4137e-08	5.70952e-07	KCNC1	11	17734774	17856804	+	14417	protein_coding	potassium voltage-gated channel subfamily C member 1 [Source:HGNC Symbol;Acc:HGNC:6233]	Ion_trans	697	568	54	38	1.36227	1.23537	0.189353	0.100649
ENSG00000249069	90.1469	110.181	0	0	8.81957	4.48559e-08	5.79615e-07	LINC01033	5	54320944	54415125	+	1261	lincRNA	long intergenic non-protein coding RNA 1033 [Source:HGNC Symbol;Acc:HGNC:49019]	-	118	129	0	0	2.63678	3.20773	0	0
ENSG00000154928	168.834	161.428	15.3074	7.30435	3.89577	4.53383e-08	5.85209e-07	EPHB1	3	134597801	135260467	+	6956	protein_coding	EPH receptor B1 [Source:HGNC Symbol;Acc:HGNC:3392]	Pkinase_Tyr	221	189	11	7	0.895239	0.851971	0.0799442	0.0384271
ENSG00000182674	101.606	97.3693	0	0	8.81011	4.55456e-08	5.87563e-07	KCNB2	8	72537391	72938349	+	3582	protein_coding	potassium voltage-gated channel subfamily B member 2 [Source:HGNC Symbol;Acc:HGNC:6232]	Ion_trans	133	114	0	0	1.04624	0.997934	0	0
ENSG00000097046	4741.11	4977.79	154.465	668.869	3.55938	4.57146e-08	5.89421e-07	CDC7	1	91500893	91525764	+	3557	protein_coding	cell division cycle 7 [Source:HGNC Symbol;Acc:HGNC:1745]	Pkinase	6206	5828	111	641	49.1625	51.3758	1.57759	6.88134
ENSG00000145736	630.264	632.9	36.181	92.8695	3.28173	4.67132e-08	6.01003e-07	GTF2H2	5	71032670	71067689	-	8676	protein_coding	general transcription factor IIH subunit 2 [Source:HGNC Symbol;Acc:HGNC:4656]	-	825	741	26	89	2.67942	2.67807	0.151498	0.391714
ENSG00000236333	103.134	94.8069	0	0	8.80265	4.72971e-08	6.08165e-07	TRHDE-AS1	12	72253508	72274907	-	8781	processed_transcript	TRHDE antisense RNA 1 [Source:HGNC Symbol;Acc:HGNC:27471]	-	135	111	0	0	0.433208	0.396371	0	0
ENSG00000152969	198.629	226.341	19.4821	2.08696	4.35495	4.87797e-08	6.26205e-07	JAKMIP1	4	6026199	6200591	-	3812	protein_coding	janus kinase and microtubule interacting protein 1 [Source:HGNC Symbol;Acc:HGNC:26460]	-	260	265	14	2	1.92188	2.17979	0.185664	0.0200344
ENSG00000251602	323.918	359.583	45.9221	27.1304	3.23554	4.90306e-08	6.29084e-07	AL928654.1	14	105416884	105419739	-	2279	antisense	-	-	424	421	33	26	5.24237	5.79242	0.732021	0.43564
ENSG00000241697	164.251	137.513	11.1326	9.3913	3.88518	4.9252e-08	6.31582e-07	TMEFF1	9	100473113	100577636	+	2611	protein_coding	transmembrane protein with EGF like and two follistatin like domains 1 [Source:HGNC Symbol;Acc:HGNC:11866]	-	215	161	8	9	2.32027	1.93349	0.154895	0.131624
novel.626	130.637	115.306	2.78316	0	6.64449	5.00525e-08	6.40108e-07	-	CHR_HSCHR6_MHC_MCF_CTG1	30986722	30987728	+	377	-	-	-	171	135	2	0	12.7809	11.2283	0.26819	0
ENSG00000118507	393.438	359.583	9.74105	44.8696	3.76236	5.03956e-08	6.43798e-07	AKAP7	6	131135666	131283535	+	4394	protein_coding	A-kinase anchoring protein 7 [Source:HGNC Symbol;Acc:HGNC:377]	-	515	421	7	43	3.30258	3.00431	0.0805363	0.373686
ENSG00000139800	1364.43	1286.3	176.731	213.913	2.76151	5.12066e-08	6.53452e-07	ZIC5	13	99962964	99971909	-	4639	protein_coding	Zic family member 5 [Source:HGNC Symbol;Acc:HGNC:20322]	-	1786	1506	127	205	10.8483	10.1794	1.38399	1.68744
ENSG00000118257	569.148	561.155	76.5368	20.8696	3.55038	5.14259e-08	6.55895e-07	NRP2	2	205681990	205798133	+	13896	protein_coding	neuropilin 2 [Source:HGNC Symbol;Acc:HGNC:8005]	CUB	745	657	55	20	1.51068	1.48251	0.200091	0.054959
novel.710	138.276	108.473	0	2.08696	6.72478	5.57218e-08	7.08008e-07	-	GL000009.2	98174	124832	-	2511	-	PF03184:DDE superfamily endonuclease	DDE	181	127	0	2	2.03113	1.58591	0	0.0304146
ENSG00000277443	9490.63	9402.11	256.051	1262.61	3.63595	5.64028e-08	7.16276e-07	MARCKS	6	113857362	113863471	+	4275	protein_coding	myristoylated alanine rich protein kinase C substrate [Source:HGNC Symbol;Acc:HGNC:6759]	-	12423	11008	184	1210	81.8836	80.7411	2.17588	10.8081
ENSG00000087495	152.791	163.99	0	11.4783	4.69938	5.85193e-08	7.42356e-07	PHACTR3	20	59577509	59847711	+	6095	protein_coding	phosphatase and actin regulator 3 [Source:HGNC Symbol;Acc:HGNC:15833]	-	200	192	0	11	0.924619	0.987757	0	0.0689156
ENSG00000180881	167.306	180.219	8.34947	16.6956	3.771	5.87317e-08	7.4465e-07	CAPS2	12	75275979	75390928	-	6689	protein_coding	calcyphosine 2 [Source:HGNC Symbol;Acc:HGNC:16471]	-	219	211	6	16	0.922549	0.989108	0.0453465	0.0913393
ENSG00000233101	171.89	200.717	0	1.04348	8.28654	5.8849e-08	7.45736e-07	HOXB-AS3	17	48549630	48606414	+	1913	antisense	HOXB cluster antisense RNA 3 [Source:HGNC Symbol;Acc:HGNC:40283]	-	225	235	0	1	3.31416	3.8519	0	0.0199611
ENSG00000154080	96.2585	94.8069	0	0	8.75155	5.92845e-08	7.50853e-07	CHST9	18	26906481	27185317	-	11521	protein_coding	carbohydrate sulfotransferase 9 [Source:HGNC Symbol;Acc:HGNC:19898]	-	126	111	0	0	0.308167	0.302103	0	0
ENSG00000115844	2045.88	2009.74	349.286	258.783	2.7386	5.93524e-08	7.5131e-07	DLX2	2	172099439	172102900	-	2970	protein_coding	distal-less homeobox 2 [Source:HGNC Symbol;Acc:HGNC:2915]	Homeobox	2678	2353	251	248	25.4074	24.8421	4.27239	3.18856
ENSG00000135324	91.6748	99.0775	0	0	8.74906	6.01931e-08	7.61542e-07	MRAP2	6	84033756	84090881	+	2153	protein_coding	melanocortin 2 receptor accessory protein 2 [Source:HGNC Symbol;Acc:HGNC:21232]	-	120	116	0	0	1.57052	1.68942	0	0
ENSG00000136160	103.898	87.1199	0	0	8.75141	6.06588e-08	7.66125e-07	EDNRB	13	77895481	77975529	-	5607	protein_coding	endothelin receptor type B [Source:HGNC Symbol;Acc:HGNC:3180]	7tm_1	136	102	0	0	0.683463	0.570417	0	0
ENSG00000120693	872.438	860.949	121.067	130.435	2.78439	6.24545e-08	7.8762e-07	SMAD9	13	36844831	36920765	-	5723	protein_coding	SMAD family member 9 [Source:HGNC Symbol;Acc:HGNC:6774]	MH2	1142	1008	87	125	5.62275	5.5228	0.768509	0.834037
ENSG00000260947	82.5073	108.473	0	0	8.75053	6.28748e-08	7.92497e-07	AL356489.2	9	33697459	33700986	+	3528	lincRNA	-	-	108	127	0	0	0.862584	1.12875	0	0
ENSG00000269994	113.066	78.5787	0	0	8.75636	6.38208e-08	8.03135e-07	AL513318.2	9	87008455	87042126	-	2012	lincRNA	-	-	148	92	0	0	2.07272	1.43378	0	0
ENSG00000183114	93.2027	95.6611	0	0	8.73478	6.39629e-08	8.04494e-07	FAM43B	1	20552439	20555010	+	2572	protein_coding	family with sequence similarity 43 member B [Source:HGNC Symbol;Acc:HGNC:31791]	-	122	112	0	0	1.33658	1.36543	0	0
ENSG00000031081	398.021	397.164	36.181	56.3478	3.0964	6.53459e-08	8.20578e-07	ARHGAP31	3	119294373	119420714	+	9384	protein_coding	Rho GTPase activating protein 31 [Source:HGNC Symbol;Acc:HGNC:29216]	RhoGAP	521	465	26	54	1.56443	1.55377	0.140068	0.219738
ENSG00000254685	736.454	772.975	15.3074	91.8261	3.80325	6.64997e-08	8.34622e-07	FPGT	1	74198212	74234086	+	4180	protein_coding	fucose-1-phosphate guanylyltransferase [Source:HGNC Symbol;Acc:HGNC:3825]	-	964	905	11	88	6.49841	6.78883	0.133036	0.803906
ENSG00000167619	121.469	118.722	6.95789	0	5.23763	6.83518e-08	8.55139e-07	TMEM145	19	42313325	42325062	+	2640	protein_coding	transmembrane protein 145 [Source:HGNC Symbol;Acc:HGNC:26912]	-	159	139	5	0	1.69707	1.65095	0.0957458	0
ENSG00000087245	109.246	78.5787	0	0	8.72728	7.15222e-08	8.90087e-07	MMP2	16	55389700	55506691	+	4933	protein_coding	matrix metallopeptidase 2 [Source:HGNC Symbol;Acc:HGNC:7166]	Hemopexin	143	92	0	0	0.816829	0.584789	0	0
ENSG00000175556	88.619	117.868	1.39158	2.08696	5.86045	7.41087e-08	9.20336e-07	LONRF3	X	118974614	119018355	+	4041	protein_coding	LON peptidase N-terminal domain and ring finger 3 [Source:HGNC Symbol;Acc:HGNC:21152]	-	116	138	1	2	0.808864	1.07081	0.0125102	0.018899
ENSG00000170162	84.7992	99.9316	0	0	8.70267	7.52749e-08	9.33836e-07	VGLL2	6	117265558	117273565	+	2231	protein_coding	vestigial like family member 2 [Source:HGNC Symbol;Acc:HGNC:20232]	-	111	117	0	0	1.40194	1.64441	0	0
ENSG00000174705	2747.95	2680.22	460.613	404.869	2.64921	7.60949e-08	9.43018e-07	SH3PXD2B	5	172325000	172454523	-	8242	protein_coding	SH3 and PX domains 2B [Source:HGNC Symbol;Acc:HGNC:29242]	PX	3597	3138	331	388	12.2974	11.9383	2.03025	1.79762
ENSG00000170801	101.606	81.9952	0	0	8.69433	7.92457e-08	9.8052e-07	HTRA3	4	8269765	8307111	+	3321	protein_coding	HtrA serine peptidase 3 [Source:HGNC Symbol;Acc:HGNC:30406]	-	133	96	0	0	1.12847	0.906411	0	0
ENSG00000271270	278.08	291.254	37.5726	15.6522	3.43717	7.94696e-08	9.82776e-07	TMCC1-AS1	3	129893871	129918575	+	4623	antisense	TMCC1 antisense RNA 1 (head to head) [Source:HGNC Symbol;Acc:HGNC:49060]	-	364	341	27	15	2.21863	2.31288	0.295252	0.123899
novel.528	94.7306	87.974	0	0	8.68708	7.95792e-08	9.83615e-07	-	CHR_HSCHR22_1_CTG3	22556801	22568443	-	2403	-	-	-	124	103	0	0	1.45403	1.34402	0	0
ENSG00000145604	4058.9	4130.51	452.263	746.087	2.77191	8.0007e-08	9.87869e-07	SKP2	5	36151989	36184319	+	3837	protein_coding	S-phase kinase associated protein 2 [Source:HGNC Symbol;Acc:HGNC:10901]	-	5313	4836	325	715	39.0171	39.52	4.28199	7.11563
ENSG00000181804	89.3829	92.2446	0	0	8.67841	8.24687e-08	1.0172e-06	SLC9A9	3	143265222	143848531	-	4087	protein_coding	solute carrier family 9 member A9 [Source:HGNC Symbol;Acc:HGNC:20653]	Na_H_Exchanger	117	108	0	0	0.806655	0.828594	0	0
ENSG00000164318	83.2713	96.5152	0	0	8.66355	8.9418e-08	1.09547e-06	EGFLAM	5	38258409	38465021	+	5724	protein_coding	EGF like, fibronectin type III and laminin G domains [Source:HGNC Symbol;Acc:HGNC:26810]	Laminin_G_2	109	113	0	0	0.536579	0.619015	0	0
ENSG00000259683	167.306	179.364	0	1.04348	8.18263	8.99263e-08	1.10113e-06	AC243562.2	15	84389729	84395903	+	970	unprocessed_pseudogene	-	-	219	210	0	1	6.36178	6.78844	0	0.0393665
ENSG00000018869	88.619	90.5364	0	0	8.65865	9.00958e-08	1.10263e-06	ZNF582	19	56375846	56393545	-	3350	protein_coding	zinc finger protein 582 [Source:HGNC Symbol;Acc:HGNC:26421]	KRAB	116	106	0	0	0.975707	0.992164	0	0
ENSG00000133943	617.277	635.463	101.585	57.3913	2.98382	9.05623e-08	1.10777e-06	DGLUCY	14	91060333	91225632	+	7212	protein_coding	D-glutamate cyclase [Source:HGNC Symbol;Acc:HGNC:20498]	-	808	744	73	55	3.15691	3.23474	0.511706	0.29121
ENSG00000146021	100.842	128.117	0	6.26087	5.07619	9.21348e-08	1.12522e-06	KLHL3	5	137617500	137736090	-	11854	protein_coding	kelch like family member 3 [Source:HGNC Symbol;Acc:HGNC:6354]	BACK	132	150	0	6	0.313773	0.396779	0	0.0193279
ENSG00000140931	882.37	865.22	141.941	114.783	2.76864	9.21764e-08	1.12522e-06	CMTM3	16	66603874	66613892	+	3163	protein_coding	CKLF like MARVEL transmembrane domain containing 3 [Source:HGNC Symbol;Acc:HGNC:19174]	-	1155	1013	102	110	10.2894	10.0423	1.63025	1.32798
ENSG00000196867	100.078	79.4328	0	0	8.66185	9.22267e-08	1.12522e-06	ZFP28	19	56538948	56556810	+	6974	protein_coding	ZFP28 zinc finger protein [Source:HGNC Symbol;Acc:HGNC:17801]	KRAB	131	93	0	0	0.529293	0.418142	0	0
ENSG00000134954	97.0225	81.9952	0	0	8.6578	9.22274e-08	1.12522e-06	ETS1	11	128458761	128587558	-	7149	protein_coding	ETS proto-oncogene 1, transcription factor [Source:HGNC Symbol;Acc:HGNC:3488]	Ets	127	96	0	0	0.50057	0.421064	0	0
ENSG00000083844	538.589	509.053	69.5789	74.0869	2.86563	9.41652e-08	1.14649e-06	ZNF264	19	57191500	57222846	+	12532	protein_coding	zinc finger protein 264 [Source:HGNC Symbol;Acc:HGNC:13057]	KRAB	705	596	50	71	1.58517	1.49124	0.201699	0.21634
ENSG00000154146	1323.94	1236.76	198.996	200.348	2.68081	9.90093e-08	1.20175e-06	NRGN	11	124739846	124747210	+	1309	protein_coding	neurogranin [Source:HGNC Symbol;Acc:HGNC:8000]	-	1733	1448	143	192	37.3049	34.6858	5.52268	5.60093
ENSG00000142303	140.568	105.056	8.34947	5.21739	4.20121	1.01125e-07	1.22617e-06	ADAMTS10	19	8580242	8610735	-	5703	protein_coding	ADAM metallopeptidase with thrombospondin type 1 motif 10 [Source:HGNC Symbol;Acc:HGNC:13201]	TSP_1	184	123	6	5	0.909119	0.676277	0.0531865	0.0334785
ENSG00000167311	113.066	93.9528	0	4.17391	5.49812	1.03971e-07	1.25733e-06	ART5	11	3638503	3642316	-	1691	protein_coding	ADP-ribosyltransferase 5 [Source:HGNC Symbol;Acc:HGNC:24049]	-	148	110	0	4	2.46618	2.03973	0	0.0903265
ENSG00000128606	102.37	94.8069	1.39158	2.08696	5.79439	1.05147e-07	1.2688e-06	LRRC17	7	102912991	102944949	+	2674	protein_coding	leucine rich repeat containing 17 [Source:HGNC Symbol;Acc:HGNC:16895]	-	134	111	1	2	1.41205	1.30162	0.0189057	0.0285606
ENSG00000176204	100.078	76.0164	0	0	8.63419	1.06063e-07	1.27882e-06	LRRTM4	2	76747719	77593319	-	5410	protein_coding	leucine rich repeat transmembrane neuronal 4 [Source:HGNC Symbol;Acc:HGNC:19411]	-	131	89	0	0	0.682308	0.51584	0	0
ENSG00000143799	38091.6	38981.9	6455.53	6651.13	2.55593	1.0664e-07	1.28513e-06	PARP1	1	226360691	226408079	-	7169	protein_coding	poly(ADP-ribose) polymerase 1 [Source:HGNC Symbol;Acc:HGNC:270]	WGR	49861	45640	4639	6374	195.979	199.623	32.7129	33.951
ENSG00000131471	203.976	207.55	22.2653	4.17391	4.00286	1.08828e-07	1.31082e-06	AOC3	17	42851184	42858130	+	4524	protein_coding	amine oxidase, copper containing 3 [Source:HGNC Symbol;Acc:HGNC:550]	-	267	243	16	4	1.66301	1.68425	0.178793	0.0337626
ENSG00000260948	117.649	108.473	0	2.08696	6.59926	1.09386e-07	1.31688e-06	AL390195.2	1	111431046	111433068	-	2023	sense_overlapping	-	-	154	127	0	2	2.14502	1.96848	0	0.0377514
ENSG00000153208	583.663	546.635	82.1032	77.2174	2.8274	1.09859e-07	1.32122e-06	MERTK	2	111898479	112029561	+	4700	protein_coding	MER proto-oncogene, tyrosine kinase [Source:HGNC Symbol;Acc:HGNC:7027]	Pkinase_Tyr	764	640	59	74	4.58038	4.26977	0.634611	0.601219
novel.241	223.839	196.447	19.4821	21.913	3.3407	1.13053e-07	1.35825e-06	-	CHR_HG2104_PATCH	112911434	112956877	-	4847	-	PF07690:Major Facilitator Superfamily	MFS_1	293	230	14	21	1.70334	1.48791	0.146019	0.165442
ENSG00000178860	83.2713	88.8281	0	0	8.60062	1.17161e-07	1.40402e-06	MSC	8	71841549	71844468	-	2113	protein_coding	musculin [Source:HGNC Symbol;Acc:HGNC:7321]	HLH	109	104	0	0	1.45356	1.54332	0	0
ENSG00000152402	130.637	181.927	12.5242	11.4783	3.70575	1.19585e-07	1.43163e-06	GUCY1A2	11	106674012	107018524	-	16361	protein_coding	guanylate cyclase 1 soluble subunit alpha 2 [Source:HGNC Symbol;Acc:HGNC:4684]	Guanylate_cyc	171	213	9	11	0.294505	0.408218	0.0278091	0.0256733
novel.363	66.4642	109.327	0	0	8.63069	1.20293e-07	1.43937e-06	-	CHR_HSCHR15_4_CTG8	29062305	29259568	+	4100	-	PF00640:Phosphotyrosine interaction domain (PTB/PID)|PF00595:PDZ domain	PID	87	128	0	0	0.597918	0.978923	0	0
ENSG00000197016	78.6875	93.0987	0	0	8.59785	1.20534e-07	1.44153e-06	ZNF470	19	56567511	56588911	+	9627	protein_coding	zinc finger protein 470 [Source:HGNC Symbol;Acc:HGNC:22220]	KRAB	103	109	0	0	0.301476	0.355024	0	0
ENSG00000227640	143.624	87.1199	0	2.08696	6.63029	1.21249e-07	1.44861e-06	SOX21-AS1	13	94712716	94716246	+	3287	lincRNA	SOX21 antisense divergent transcript 1 [Source:HGNC Symbol;Acc:HGNC:39807]	-	188	102	0	2	1.61163	0.973023	0	0.0232343
novel.370	169.598	129.826	12.5242	1.04348	4.54007	1.2143e-07	1.45004e-06	-	CHR_HSCHR15_4_CTG8	28358832	28385330	-	2660	-	PF00415:Regulator of chromosome condensation (RCC1) repeat	-	222	152	9	1	2.35168	1.79178	0.171047	0.0143555
ENSG00000049449	2125.33	2054.15	365.985	308.869	2.6312	1.22252e-07	1.45838e-06	RCN1	11	32090904	32105755	+	4675	protein_coding	reticulocalbin 1 [Source:HGNC Symbol;Acc:HGNC:9934]	-	2782	2405	263	296	16.768	16.1308	2.84399	2.41774
ENSG00000164403	841.116	878.886	134.983	42.7826	3.28206	1.22804e-07	1.46348e-06	SHROOM1	5	132822141	132830898	-	4420	protein_coding	shroom family member 1 [Source:HGNC Symbol;Acc:HGNC:24084]	-	1101	1029	97	41	7.01894	7.29988	1.10944	0.35421
ENSG00000213190	1450.75	1498.12	217.086	251.478	2.6532	1.26899e-07	1.50999e-06	MLLT11	1	151057758	151068497	+	4075	protein_coding	MLLT11, transcription factor 7 cofactor [Source:HGNC Symbol;Acc:HGNC:16997]	-	1899	1754	156	241	13.1312	13.4966	1.93531	2.25833
ENSG00000198908	680.685	661.94	58.4463	111.652	2.97484	1.2707e-07	1.51127e-06	BHLHB9	X	102720688	102753540	+	5518	protein_coding	basic helix-loop-helix family member b9 [Source:HGNC Symbol;Acc:HGNC:29353]	-	891	775	42	107	4.54991	4.40395	0.384788	0.740459
ENSG00000116785	101.606	99.9316	0	3.13043	5.86269	1.27526e-07	1.51517e-06	CFHR3	1	196774795	196795406	+	3774	protein_coding	complement factor H related 3 [Source:HGNC Symbol;Acc:HGNC:16980]	Sushi	133	117	0	3	0.993016	0.97209	0	0.0303542
ENSG00000088756	161.959	164.844	0	1.04348	8.09765	1.28032e-07	1.52041e-06	ARHGAP28	18	6729718	6915716	+	11910	protein_coding	Rho GTPase activating protein 28 [Source:HGNC Symbol;Acc:HGNC:25509]	RhoGAP	212	193	0	1	0.501569	0.508122	0	0.00320617
novel.205	81.7433	87.974	0	0	8.5805	1.28299e-07	1.52281e-06	-	9	89929507	89935914	-	1562	-	-	-	107	103	0	0	1.93023	2.06766	0	0
ENSG00000072657	82.5073	87.1199	0	0	8.57976	1.28519e-07	1.52466e-06	TRHDE	12	72087266	72670757	+	11950	protein_coding	thyrotropin releasing hormone degrading enzyme [Source:HGNC Symbol;Acc:HGNC:30748]	-	108	102	0	0	0.254661	0.267642	0	0
ENSG00000232320	174.182	237.444	22.2653	16.6956	3.40903	1.30346e-07	1.54479e-06	AC009299.2	2	161340816	161341326	-	511	processed_pseudogene	-	-	228	278	16	16	12.5725	17.0587	1.5829	1.19563
ENSG00000224905	90.9108	103.348	2.78316	1.04348	5.73671	1.31723e-07	1.5595e-06	AP001347.1	21	14027421	14144468	+	1770	antisense	-	-	119	121	2	1	1.89444	2.14356	0.0571229	0.0215737
ENSG00000129244	93.9667	113.597	5.56632	3.13043	4.60964	1.31786e-07	1.5595e-06	ATP1B2	17	7646627	7657768	+	3276	protein_coding	ATPase Na+/K+ transporting subunit beta 2 [Source:HGNC Symbol;Acc:HGNC:805]	-	123	133	4	3	1.05796	1.27301	0.0617262	0.0349684
ENSG00000101938	87.091	81.1411	0	0	8.56802	1.35664e-07	1.60459e-06	CHRDL1	X	110673856	110795819	-	3920	protein_coding	chordin like 1 [Source:HGNC Symbol;Acc:HGNC:29861]	VWC	114	95	0	0	0.819455	0.759906	0	0
ENSG00000124920	631.792	592.757	100.194	43.8261	3.09584	1.39307e-07	1.64208e-06	MYRF	11	61752642	61788518	+	10680	protein_coding	myelin regulatory factor [Source:HGNC Symbol;Acc:HGNC:1181]	NDT80_PhoG	827	694	72	42	2.18193	2.03756	0.340812	0.150168
ENSG00000138336	954.182	954.902	83.4947	165.913	2.93198	1.39321e-07	1.64208e-06	TET1	10	68560656	68694482	+	9288	protein_coding	tet methylcytosine dioxygenase 1 [Source:HGNC Symbol;Acc:HGNC:29484]	zf-CXXC	1249	1118	60	159	3.78919	3.77435	0.326575	0.653693
ENSG00000133026	11499.1	11361.5	1740.87	2120.35	2.56562	1.42429e-07	1.6762e-06	MYH10	17	8474205	8630761	-	9011	protein_coding	myosin heavy chain 10 [Source:HGNC Symbol;Acc:HGNC:7568]	Myosin_tail_1	15052	13302	1251	2032	47.0682	46.2878	7.0184	8.61092
ENSG00000138686	1317.06	1360.61	186.472	233.739	2.67072	1.42571e-07	1.67624e-06	BBS7	4	121824440	121870497	-	4829	protein_coding	Bardet-Biedl syndrome 7 [Source:HGNC Symbol;Acc:HGNC:18758]	-	1724	1593	134	224	10.0597	10.3438	1.40282	1.77129
ENSG00000138741	99.3143	69.1834	0	0	8.57068	1.45911e-07	1.71376e-06	TRPC3	4	121879027	121951754	-	4358	protein_coding	transient receptor potential cation channel subfamily C member 3 [Source:HGNC Symbol;Acc:HGNC:12335]	Ion_trans	130	81	0	0	0.840548	0.582801	0	0
ENSG00000226259	130.637	130.68	1.39158	10.4348	4.39588	1.49925e-07	1.75916e-06	GTF2H2B	5	70415352	70448015	+	3979	transcribed_unprocessed_pseudogene	general transcription factor IIH subunit 2B (pseudogene) [Source:HGNC Symbol;Acc:HGNC:31393]	-	171	153	1	10	1.21096	1.2057	0.0127051	0.0959677
ENSG00000099204	2648.64	2762.21	375.726	498.782	2.62864	1.51355e-07	1.77417e-06	ABLIM1	10	114431113	114685003	-	9871	protein_coding	actin binding LIM protein 1 [Source:HGNC Symbol;Acc:HGNC:78]	LIM	3467	3234	270	478	9.8969	10.2731	1.38279	1.84912
ENSG00000156535	1440.82	1335.84	64.0126	221.217	3.27812	1.5508e-07	1.81603e-06	CD109	6	73695785	73828316	+	9563	protein_coding	CD109 molecule [Source:HGNC Symbol;Acc:HGNC:21685]	A2M_comp	1886	1564	46	212	5.55717	5.1282	0.243174	0.846526
ENSG00000100206	306.347	324.564	27.8316	44.8696	3.10864	1.56727e-07	1.83442e-06	DMC1	22	38518949	38570286	-	3524	protein_coding	DNA meiotic recombinase 1 [Source:HGNC Symbol;Acc:HGNC:2927]	-	401	380	20	43	3.20638	3.3812	0.286911	0.465941
ENSG00000135919	508.031	506.491	66.7958	76.1739	2.82546	1.57407e-07	1.8405e-06	SERPINE2	2	223975112	224039319	-	8891	protein_coding	serpin family E member 2 [Source:HGNC Symbol;Acc:HGNC:8951]	Serpin	665	593	48	73	2.10755	2.09135	0.272926	0.313524
ENSG00000180660	97.7864	117.868	2.78316	0	6.45227	1.58454e-07	1.85095e-06	MAB21L1	13	35474182	35477209	-	3028	protein_coding	mab-21 like 1 [Source:HGNC Symbol;Acc:HGNC:6757]	-	128	138	2	0	1.19113	1.42904	0.0333909	0
ENSG00000113319	165.015	162.282	9.74105	16.6956	3.61194	1.60106e-07	1.86933e-06	RASGRF2	5	80960672	81230156	+	10717	protein_coding	Ras protein specific guanine nucleotide releasing factor 2 [Source:HGNC Symbol;Acc:HGNC:9876]	RhoGEF	216	190	7	16	0.56792	0.555908	0.0330201	0.0570093
ENSG00000175445	84.0352	79.4328	0	0	8.52655	1.63036e-07	1.9026e-06	LPL	8	19901717	19967258	+	4382	protein_coding	lipoprotein lipase [Source:HGNC Symbol;Acc:HGNC:6677]	Lipase	110	93	0	0	0.707338	0.665477	0	0
ENSG00000236609	365.935	316.877	50.0968	19.8261	3.30292	1.66906e-07	1.94487e-06	ZNF853	7	6615617	6624290	+	3857	protein_coding	zinc finger protein 853 [Source:HGNC Symbol;Acc:HGNC:21767]	zf-C2H2	479	371	36	19	3.49939	3.01611	0.471853	0.188106
ENSG00000162999	248.286	266.484	4.17474	29.2174	3.91045	1.72308e-07	2.00091e-06	DUSP19	2	183078559	183100005	+	5376	protein_coding	dual specificity phosphatase 19 [Source:HGNC Symbol;Acc:HGNC:18894]	DSPc	325	312	3	28	1.70345	1.81978	0.0282108	0.198883
ENSG00000146966	87.091	104.202	4.17474	1.04348	5.28143	1.72882e-07	2.00658e-06	DENND2A	7	140518420	140673993	-	5148	protein_coding	DENN domain containing 2A [Source:HGNC Symbol;Acc:HGNC:22212]	DENN	114	122	3	1	0.623983	0.743094	0.0294602	0.00741755
ENSG00000259660	74.1038	87.974	0	0	8.51391	1.7537e-07	2.03246e-06	DNM1P47	15	101751032	101794302	+	15281	transcribed_unprocessed_pseudogene	dynamin 1 pseudogene 47 [Source:HGNC Symbol;Acc:HGNC:35200]	-	97	103	0	0	0.178865	0.211353	0	0
novel.134	99.3143	99.9316	4.17474	0	5.73295	1.79086e-07	2.0735e-06	-	22	25439741	25447974	-	972	-	-	-	130	117	3	0	3.76863	3.77435	0.15603	0
ENSG00000180015	190.989	211.821	16.6989	22.9565	3.33561	1.80708e-07	2.09125e-06	AC093909.1	4	188738373	188739494	+	1122	processed_pseudogene	-	-	250	248	12	22	6.27847	6.93077	0.540682	0.748736
ENSG00000163536	154.319	171.677	4.17474	16.6956	3.92289	1.82653e-07	2.11273e-06	SERPINI1	3	167735243	167825568	+	2418	protein_coding	serpin family I member 1 [Source:HGNC Symbol;Acc:HGNC:8943]	Serpin	202	201	3	16	2.35397	2.60653	0.0627218	0.252675
ENSG00000153993	158.903	146.054	0	1.04348	7.99811	1.94848e-07	2.24154e-06	SEMA3D	7	84995553	85186855	-	8062	protein_coding	semaphorin 3D [Source:HGNC Symbol;Acc:HGNC:10726]	Sema	208	171	0	1	0.726988	0.665083	0	0.00473648
ENSG00000170370	163.487	141.783	0	1.04348	7.99967	1.95474e-07	2.24672e-06	EMX2	10	117542444	117549546	+	3262	protein_coding	empty spiracles homeobox 2 [Source:HGNC Symbol;Acc:HGNC:3341]	Homeobox	214	166	0	1	1.84857	1.59568	0	0.0117062
ENSG00000120868	1449.23	1440.89	158.64	268.174	2.75726	1.96127e-07	2.25312e-06	APAF1	12	98645141	98735433	+	7908	protein_coding	apoptotic peptidase activating factor 1 [Source:HGNC Symbol;Acc:HGNC:576]	NB-ARC	1897	1687	114	257	6.75938	6.68915	0.728772	1.24098
ENSG00000139219	432.399	433.037	69.5789	33.3913	3.08084	1.98974e-07	2.28471e-06	COL2A1	12	47972965	48004554	-	6664	protein_coding	collagen type II alpha 1 chain [Source:HGNC Symbol;Acc:HGNC:2200]	VWC	566	507	50	32	2.39325	2.38559	0.379305	0.183364
ENSG00000105926	1705.15	1893.58	129.417	321.391	2.99396	1.99074e-07	2.28475e-06	MPP6	7	24573268	24694193	+	9369	protein_coding	membrane palmitoylated protein 6 [Source:HGNC Symbol;Acc:HGNC:18167]	SH3_2	2232	2217	93	308	6.71286	7.41985	0.501815	1.25533
ENSG00000131477	95.4946	101.64	4.17474	0	5.71723	2.0061e-07	2.30127e-06	RAMP2	17	42758447	42763041	+	1148	protein_coding	receptor activity modifying protein 2 [Source:HGNC Symbol;Acc:HGNC:9844]	-	125	119	3	0	3.06814	3.25033	0.132109	0
ENSG00000112320	620.333	559.446	83.4947	90.7826	2.75825	2.01171e-07	2.30619e-06	SOBP	6	107489958	107660167	+	6904	protein_coding	sine oculis binding protein homolog [Source:HGNC Symbol;Acc:HGNC:29256]	-	812	655	60	87	3.31407	2.97484	0.439343	0.481191
ENSG00000224294	95.4946	64.9129	0	0	8.49974	2.02051e-07	2.3133e-06	PINCR	X	43176994	43226598	+	2228	lincRNA	p53-induced noncoding RNA [Source:HGNC Symbol;Acc:HGNC:53590]	-	125	76	0	0	1.58089	1.0696	0	0
ENSG00000258441	1155.87	1271.78	76.5368	208.696	3.08464	2.02931e-07	2.32224e-06	LINC00641	14	21200079	21206900	-	5715	processed_transcript	long intergenic non-protein coding RNA 641 [Source:HGNC Symbol;Acc:HGNC:27511]	-	1513	1489	55	200	7.45983	8.1696	0.486519	1.33633
ENSG00000113083	252.106	233.174	9.74105	31.3043	3.53857	2.03527e-07	2.32794e-06	LOX	5	122063195	122078360	-	5547	protein_coding	lysyl oxidase [Source:HGNC Symbol;Acc:HGNC:6664]	-	330	273	7	30	1.67634	1.54322	0.063796	0.20652
ENSG00000198944	302.527	293.816	40.3558	33.3913	3.01914	2.05489e-07	2.34697e-06	SOWAHA	5	132813587	132816797	+	3211	protein_coding	sosondowah ankyrin repeat domain family member A [Source:HGNC Symbol;Acc:HGNC:27033]	-	396	344	29	32	3.47505	3.35924	0.456574	0.380547
ENSG00000276141	156.611	130.68	11.1326	11.4783	3.66647	2.07864e-07	2.36951e-06	WHAMMP3	15	22664359	22686213	+	7269	transcribed_unprocessed_pseudogene	WAS protein homolog associated with actin, golgi membranes and microtubules pseudogene 3 [Source:HGNC Symbol;Acc:HGNC:27892]	-	205	153	8	11	0.794668	0.659993	0.0556377	0.0577852
ENSG00000139737	995.435	998.462	121.067	179.478	2.72756	2.106e-07	2.39723e-06	SLAIN1	13	77697854	77764242	+	4133	protein_coding	SLAIN motif family member 1 [Source:HGNC Symbol;Acc:HGNC:26387]	-	1303	1169	87	172	8.88353	8.86894	1.06416	1.58914
ENSG00000155657	663.114	714.041	89.061	115.826	2.74648	2.14017e-07	2.4326e-06	TTN	2	178525989	178830802	-	118976	protein_coding	titin [Source:HGNC Symbol;Acc:HGNC:12403]	Pkinase	868	836	64	111	0.205573	0.220328	0.0271941	0.0356256
ENSG00000125726	92.4387	106.765	5.56632	3.13043	4.55019	2.14393e-07	2.4357e-06	CD70	19	6583183	6604103	-	1532	protein_coding	CD70 molecule [Source:HGNC Symbol;Acc:HGNC:11937]	-	121	125	4	3	2.22553	2.55843	0.131994	0.0747758
ENSG00000162437	2505.01	2459	278.316	475.826	2.71729	2.16021e-07	2.45302e-06	RAVER2	1	64745095	64833232	+	6070	protein_coding	ribonucleoprotein, PTB binding 2 [Source:HGNC Symbol;Acc:HGNC:25577]	RRM_1	3279	2879	200	456	15.2216	14.8722	1.66569	2.86863
ENSG00000132563	812.85	753.331	139.158	83.4782	2.81836	2.18707e-07	2.48113e-06	REEP2	5	138439017	138446969	+	3284	protein_coding	receptor accessory protein 2 [Source:HGNC Symbol;Acc:HGNC:17975]	TB2_DP1_HVA22	1064	882	100	80	9.12946	8.42147	1.5394	0.93022
ENSG00000147251	1106.97	1163.31	37.5726	170.087	3.44353	2.20661e-07	2.5009e-06	DOCK11	X	118495898	118686163	+	6721	protein_coding	dedicator of cytokinesis 11 [Source:HGNC Symbol;Acc:HGNC:23483]	Ded_cyto	1449	1362	27	163	6.07492	6.35427	0.203088	0.926089
ENSG00000178752	771.596	761.018	136.375	75.1304	2.86178	2.23243e-07	2.52774e-06	ERFE	2	238158982	238168900	+	3572	protein_coding	erythroferrone [Source:HGNC Symbol;Acc:HGNC:26727]	-	1010	891	98	72	7.96739	7.82148	1.38697	0.769697
ENSG00000277702	84.0352	71.7458	0	0	8.45721	2.25093e-07	2.54624e-06	AC239859.6	1	143419625	143420207	-	213	unprocessed_pseudogene	-	-	110	84	0	0	14.5519	12.3658	0	0
ENSG00000170965	150.499	156.303	8.34947	15.6522	3.65438	2.25354e-07	2.54797e-06	PLAC1	X	134565838	134764322	-	1916	protein_coding	placenta specific 1 [Source:HGNC Symbol;Acc:HGNC:9044]	-	197	183	6	15	2.89719	2.99487	0.15831	0.298947
ENSG00000213424	74.8677	80.287	0	0	8.45107	2.28255e-07	2.5783e-06	KRT222	17	40654665	40665181	-	3169	protein_coding	keratin 222 [Source:HGNC Symbol;Acc:HGNC:28695]	Filament	98	94	0	0	0.871385	0.930097	0	0
ENSG00000110076	119.177	117.014	2.78316	9.3913	4.22686	2.30782e-07	2.60063e-06	NRXN2	11	64606174	64723188	-	10580	protein_coding	neurexin 2 [Source:HGNC Symbol;Acc:HGNC:8009]	Laminin_G_2	156	137	2	9	0.415475	0.406029	0.00955648	0.032483
ENSG00000279968	131.401	154.595	2.78316	13.5652	4.07665	2.45978e-07	2.75477e-06	GVQW2	6	138725211	138773652	-	2993	protein_coding	GVQW motif containing 2 [Source:HGNC Symbol;Acc:HGNC:51715]	-	172	181	2	13	1.6193	1.89624	0.0337813	0.165858
ENSG00000162620	162.723	130.68	0	1.04348	7.9427	2.52374e-07	2.81971e-06	LRRIQ3	1	74026015	74198187	-	8759	protein_coding	leucine rich repeats and IQ motif containing 3 [Source:HGNC Symbol;Acc:HGNC:28318]	-	213	153	0	1	0.685222	0.547721	0	0.00435958
ENSG00000162367	72.5759	79.4328	0	0	8.42149	2.6076e-07	2.90516e-06	TAL1	1	47216290	47232220	-	5700	protein_coding	TAL bHLH transcription factor 1, erythroid differentiation factor [Source:HGNC Symbol;Acc:HGNC:11556]	HLH	95	93	0	0	0.469629	0.5116	0	0
ENSG00000164604	82.5073	69.1834	0	0	8.41886	2.67776e-07	2.98051e-06	GPR85	7	113078331	113087778	-	7396	protein_coding	G protein-coupled receptor 85 [Source:HGNC Symbol;Acc:HGNC:4536]	7tm_1	108	81	0	0	0.411465	0.343408	0	0
ENSG00000197959	204.74	217.8	13.9158	27.1304	3.34695	2.6835e-07	2.98549e-06	DNM3	1	171841498	172418466	+	11329	protein_coding	dynamin 3 [Source:HGNC Symbol;Acc:HGNC:29125]	PH	268	255	10	26	0.666576	0.705783	0.0446233	0.0876356
ENSG00000155850	1512.63	1569.87	89.061	268.174	3.10521	2.6986e-07	3.00087e-06	SLC26A2	5	149960737	149993455	+	8606	protein_coding	solute carrier family 26 member 2 [Source:HGNC Symbol;Acc:HGNC:10994]	Sulfate_transp	1980	1838	64	257	6.48291	6.69679	0.375952	1.14033
ENSG00000157152	154.319	133.242	1.39158	0	7.89487	2.79567e-07	3.09507e-06	SYN2	3	12004402	12191400	+	5683	protein_coding	synapsin II [Source:HGNC Symbol;Acc:HGNC:11495]	-	202	156	1	0	1.00157	0.860735	0.00889562	0
ENSG00000177455	72.5759	77.7246	0	0	8.40521	2.79641e-07	3.09507e-06	CD19	16	28931939	28939346	+	2711	protein_coding	CD19 molecule [Source:HGNC Symbol;Acc:HGNC:1633]	-	95	91	0	0	0.987417	1.05253	0	0
ENSG00000144668	126.053	83.7034	6.95789	1.04348	4.80042	2.84574e-07	3.14671e-06	ITGA9	3	37452115	37823514	+	8277	protein_coding	integrin subunit alpha 9 [Source:HGNC Symbol;Acc:HGNC:6145]	FG-GAP	165	98	5	1	0.561717	0.371258	0.0305387	0.00461345
ENSG00000162624	72.5759	76.8705	0	0	8.39701	2.89733e-07	3.20075e-06	LHX8	1	75128434	75161533	+	3977	protein_coding	LIM homeobox 8 [Source:HGNC Symbol;Acc:HGNC:28838]	Homeobox	95	90	0	0	0.673092	0.709593	0	0
ENSG00000260196	332.321	273.317	29.2232	43.8261	3.04426	2.91974e-07	3.22401e-06	AC124798.1	11	17380649	17383531	+	2883	antisense	-	-	435	320	21	42	4.25159	3.48039	0.368238	0.556293
ENSG00000154529	77.9236	70.8917	0	0	8.39113	2.98514e-07	3.28546e-06	CNTNAP3B	9	41890314	42129510	-	13220	protein_coding	contactin associated protein like 3B [Source:HGNC Symbol;Acc:HGNC:32035]	F5_F8_type_C	102	83	0	0	0.217408	0.196865	0	0
ENSG00000214776	67.2282	81.9952	0	0	8.39465	2.9929e-07	3.29247e-06	AC092821.1	12	9480608	9576275	+	12000	transcribed_unprocessed_pseudogene	-	A2M_comp	88	96	0	0	0.206637	0.250849	0	0
ENSG00000240891	174.182	187.906	13.9158	20.8696	3.36785	3.03613e-07	3.33536e-06	PLCXD2	3	111674676	111846447	+	8974	protein_coding	phosphatidylinositol specific phospholipase C X domain containing 2 [Source:HGNC Symbol;Acc:HGNC:26462]	-	228	220	10	20	0.715905	0.768704	0.0563336	0.0851026
ENSG00000187621	77.1596	70.8917	0	0	8.38369	3.08144e-07	3.382e-06	TCL6	14	95650498	95679833	+	10566	processed_transcript	T cell leukemia/lymphoma 6 (non-protein coding) [Source:HGNC Symbol;Acc:HGNC:13463]	-	101	83	0	0	0.26935	0.246315	0	0
ENSG00000261730	69.52	78.5787	0	0	8.38384	3.09274e-07	3.39282e-06	AL034346.1	6	1383790	1385066	-	1277	antisense	-	-	91	92	0	0	2.00797	2.25902	0	0
ENSG00000159023	5487.5	5537.24	702.747	1108.17	2.60545	3.24301e-07	3.54778e-06	EPB41	1	28887091	29120046	+	14805	protein_coding	erythrocyte membrane protein band 4.1 [Source:HGNC Symbol;Acc:HGNC:3377]	Band_41	7183	6483	505	1062	13.6711	13.7306	1.72439	2.73914
ENSG00000137941	502.683	456.098	36.181	80.3478	3.03151	3.3178e-07	3.62287e-06	TTLL7	1	83865028	83999150	-	10543	protein_coding	tubulin tyrosine ligase like 7 [Source:HGNC Symbol;Acc:HGNC:26242]	TTL	658	534	26	77	1.7586	1.58818	0.12467	0.278885
ENSG00000112149	335.377	364.708	41.7474	52.1739	2.89439	3.3342e-07	3.6391e-06	CD83	6	14117256	14136918	+	2515	protein_coding	CD83 molecule [Source:HGNC Symbol;Acc:HGNC:1703]	-	439	427	30	50	4.9185	5.32369	0.603027	0.759156
ENSG00000141504	657.003	712.333	112.718	103.304	2.66494	3.41548e-07	3.72093e-06	SAT2	17	7626234	7627876	-	1643	protein_coding	spermidine/spermine N1-acetyltransferase family member 2 [Source:HGNC Symbol;Acc:HGNC:23160]	Acetyltransf_1	860	834	81	99	14.7492	15.9166	2.4923	2.30089
ENSG00000061337	74.1038	70.8917	0	0	8.35354	3.50842e-07	3.81866e-06	LZTS1	8	20246165	20303963	-	5706	protein_coding	leucine zipper tumor suppressor 1 [Source:HGNC Symbol;Acc:HGNC:13861]	Fez1	97	83	0	0	0.479012	0.456109	0	0
ENSG00000144354	3813.67	3779.47	353.461	747.13	2.78529	3.51345e-07	3.82061e-06	CDCA7	2	173354820	173368997	+	3934	protein_coding	cell division cycle associated 7 [Source:HGNC Symbol;Acc:HGNC:14628]	-	4992	4425	254	716	35.7558	35.2697	3.26402	6.94988
ENSG00000171502	120.705	99.9316	1.39158	8.34782	4.4307	3.53155e-07	3.83853e-06	COL24A1	1	85729233	86156943	-	9568	protein_coding	collagen type XXIV alpha 1 chain [Source:HGNC Symbol;Acc:HGNC:20821]	Collagen	158	117	1	8	0.46531	0.383431	0.00528363	0.0319277
ENSG00000132204	98.5504	97.3693	0	2.08696	6.39402	3.55568e-07	3.8612e-06	LINC00470	18	1254383	1408344	-	4063	lincRNA	long intergenic non-protein coding RNA 470 [Source:HGNC Symbol;Acc:HGNC:1225]	-	129	114	0	2	0.894642	0.879793	0	0.0187967
ENSG00000166292	70.284	74.3081	0	0	8.34937	3.57512e-07	3.87875e-06	TMEM100	17	55719627	55732121	-	2906	protein_coding	transmembrane protein 100 [Source:HGNC Symbol;Acc:HGNC:25607]	-	92	87	0	0	0.892069	0.938742	0	0
ENSG00000165757	634.848	552.613	98.8021	82.4348	2.71375	3.58116e-07	3.88351e-06	JCAD	10	30012800	30115494	-	9515	protein_coding	junctional cadherin 5 associated [Source:HGNC Symbol;Acc:HGNC:29283]	-	831	647	71	79	2.46093	2.13215	0.377227	0.317042
ENSG00000160050	373.575	360.437	59.8379	33.3913	2.98565	3.61818e-07	3.91602e-06	CCDC28B	1	32200386	32205387	+	2818	protein_coding	coiled-coil domain containing 28B [Source:HGNC Symbol;Acc:HGNC:28163]	-	489	422	43	32	4.88961	4.69563	0.771403	0.433619
ENSG00000180440	73.3398	70.8917	0	0	8.3459	3.62668e-07	3.92026e-06	SERTM1	13	36673912	36697839	+	3207	protein_coding	serine rich and transmembrane domain containing 1 [Source:HGNC Symbol;Acc:HGNC:33792]	-	96	83	0	0	0.843488	0.811525	0	0
ENSG00000112309	97.7864	104.202	0	6.26087	4.89747	3.67823e-07	3.97236e-06	B3GAT2	6	70856679	70957038	-	6565	protein_coding	beta-1,3-glucuronyltransferase 2 [Source:HGNC Symbol;Acc:HGNC:922]	-	128	122	0	6	0.549391	0.582704	0	0.0348992
ENSG00000226314	83.2713	105.056	5.56632	1.04348	4.92061	3.74333e-07	4.03897e-06	ZNF192P1	6	28161781	28169594	+	2535	transcribed_unprocessed_pseudogene	zinc finger protein 192 pseudogene 1 [Source:HGNC Symbol;Acc:HGNC:18777]	zf-C2H2	109	123	4	1	1.21159	1.52142	0.0797693	0.0150633
ENSG00000177875	94.7306	86.2658	2.78316	4.17391	4.67708	3.74993e-07	4.04423e-06	CCDC184	12	48183584	48185926	+	2343	protein_coding	coiled-coil domain containing 184 [Source:HGNC Symbol;Acc:HGNC:33749]	-	124	101	2	4	1.49127	1.35167	0.043153	0.0651908
ENSG00000225096	132.928	138.367	1.39158	0	7.81049	3.8968e-07	4.19115e-06	AL445250.1	6	57961438	58438364	+	6798	lincRNA	-	-	174	162	1	0	0.721231	0.747234	0.00743657	0
ENSG00000153012	182.586	197.301	18.0905	21.913	3.24197	3.9177e-07	4.21171e-06	LGI2	4	24998847	25030879	-	6428	protein_coding	leucine rich repeat LGI family member 2 [Source:HGNC Symbol;Acc:HGNC:18710]	-	239	231	13	21	1.04768	1.12683	0.10224	0.12475
ENSG00000177098	87.091	93.0987	4.17474	3.13043	4.64194	3.98186e-07	4.27095e-06	SCN4B	11	118133377	118152888	-	5649	protein_coding	sodium voltage-gated channel beta subunit 4 [Source:HGNC Symbol;Acc:HGNC:10592]	V-set	114	109	3	3	0.568643	0.605031	0.0268475	0.0202791
ENSG00000166707	121.469	122.993	11.1326	6.26087	3.83707	4.06252e-07	4.34957e-06	ZCCHC18	X	104112131	104115846	+	3389	protein_coding	zinc finger CCHC-type containing 18 [Source:HGNC Symbol;Acc:HGNC:32459]	-	159	144	8	6	1.322	1.33234	0.119336	0.067605
ENSG00000154127	320.098	330.543	45.9221	42.7826	2.87595	4.11965e-07	4.40674e-06	UBASH3B	11	122655675	122814473	+	9011	protein_coding	ubiquitin associated and SH3 domain containing B [Source:HGNC Symbol;Acc:HGNC:29884]	UBA	419	387	33	41	1.31023	1.34667	0.185138	0.173744
ENSG00000075043	552.341	585.924	93.2358	27.1304	3.25246	4.16465e-07	4.45286e-06	KCNQ2	20	63400210	63472677	-	12775	protein_coding	potassium voltage-gated channel subfamily Q member 2 [Source:HGNC Symbol;Acc:HGNC:6296]	Ion_trans	723	686	67	26	1.59472	1.68378	0.265135	0.0777161
ENSG00000163171	318.57	302.357	33.3979	46.9565	2.94408	4.26713e-07	4.55624e-06	CDC42EP3	2	37641882	37738468	-	10406	protein_coding	CDC42 effector protein 3 [Source:HGNC Symbol;Acc:HGNC:16943]	-	417	354	24	45	1.12917	1.0667	0.116595	0.165131
ENSG00000075945	1082.53	1059.96	123.851	205.565	2.69862	4.27075e-07	4.55804e-06	KIFAP3	1	169921326	170085208	-	4978	protein_coding	kinesin associated protein 3 [Source:HGNC Symbol;Acc:HGNC:17060]	-	1417	1241	89	197	8.02087	7.81699	0.903834	1.51116
ENSG00000250133	115.357	76.0164	2.78316	5.21739	4.54624	4.28979e-07	4.57629e-06	HOXC-AS2	12	53993810	53996785	-	2216	processed_transcript	HOXC cluster antisense RNA 2 [Source:HGNC Symbol;Acc:HGNC:43750]	-	151	89	2	5	1.92005	1.25934	0.0456262	0.0861587
ENSG00000133710	97.7864	90.5364	0	5.21739	5.05161	4.39345e-07	4.68476e-06	SPINK5	5	148025683	148137289	+	4381	protein_coding	serine peptidase inhibitor, Kazal type 5 [Source:HGNC Symbol;Acc:HGNC:15464]	-	128	106	0	5	0.823272	0.758674	0	0.0435808
ENSG00000278974	197.101	204.988	2.78316	22.9565	3.92165	4.4183e-07	4.707e-06	AC093909.6	4	188740507	188741281	-	775	TEC	-	-	258	240	2	22	9.38047	9.71029	0.130461	1.08398
ENSG00000143032	67.9921	70.8917	0	0	8.29128	4.61283e-07	4.90659e-06	BARHL2	1	90711539	90717237	-	1979	protein_coding	BarH like homeobox 2 [Source:HGNC Symbol;Acc:HGNC:954]	Homeobox	89	83	0	0	1.26722	1.31509	0	0
ENSG00000066557	2102.41	2292.45	160.032	417.391	2.92574	4.61396e-07	4.90659e-06	LRRC40	1	70144805	70205620	-	2884	protein_coding	leucine rich repeat containing 40 [Source:HGNC Symbol;Acc:HGNC:26004]	-	2752	2684	115	400	26.8881	29.1816	2.01584	5.29619
ENSG00000170989	78.6875	60.6423	0	0	8.29636	4.69843e-07	4.99192e-06	S1PR1	1	101236888	101241518	+	3071	protein_coding	sphingosine-1-phosphate receptor 1 [Source:HGNC Symbol;Acc:HGNC:3165]	7tm_1	103	71	0	0	0.94507	0.724938	0	0
ENSG00000249550	129.873	131.534	1.39158	0	7.75679	4.84605e-07	5.13721e-06	LINC01234	12	113679459	113773683	-	4484	lincRNA	long intergenic non-protein coding RNA 1234 [Source:HGNC Symbol;Acc:HGNC:49757]	-	170	154	1	0	1.06829	1.07691	0.0112743	0
ENSG00000164532	120.705	140.929	0	1.04348	7.7772	4.88582e-07	5.17704e-06	TBX20	7	35202430	35254147	-	1875	protein_coding	T-box 20 [Source:HGNC Symbol;Acc:HGNC:11598]	T-box	158	165	0	1	2.37445	2.75934	0	0.0203656
ENSG00000229151	59.5886	78.5787	0	0	8.28347	4.99008e-07	5.28277e-06	AC233976.1	X	51356944	51396462	-	451	lincRNA	-	-	78	92	0	0	4.87331	6.39637	0	0
ENSG00000141622	176.474	158.012	19.4821	13.5652	3.35052	5.06802e-07	5.36048e-06	RNF165	18	46326809	46463140	+	11419	protein_coding	ring finger protein 165 [Source:HGNC Symbol;Acc:HGNC:31696]	-	231	185	14	13	0.57002	0.508003	0.0619803	0.0434724
ENSG00000111664	267.385	275.88	41.7474	24	3.0573	5.11585e-07	5.40864e-06	GNB3	12	6839954	6847393	+	3437	protein_coding	G protein subunit beta 3 [Source:HGNC Symbol;Acc:HGNC:4400]	WD40	350	323	30	23	2.86943	2.94677	0.441261	0.255533
ENSG00000088543	213.144	234.882	32.0063	11.4783	3.38765	5.22008e-07	5.5139e-06	C3orf18	3	50558025	50571027	-	3248	protein_coding	chromosome 3 open reading frame 18 [Source:HGNC Symbol;Acc:HGNC:24837]	-	279	275	23	11	2.42044	2.65485	0.357986	0.129323
ENSG00000139746	6343.13	6381.1	510.709	1263.65	2.84143	5.31176e-07	5.60072e-06	RBM26	13	79311824	79406477	-	10122	protein_coding	RNA binding motif protein 26 [Source:HGNC Symbol;Acc:HGNC:20327]	-	8303	7471	367	1211	23.114	23.1438	1.83296	4.56853
ENSG00000033122	84.7992	87.974	1.39158	4.17391	4.89269	5.39135e-07	5.67956e-06	LRRC7	1	69568398	70151945	+	14652	protein_coding	leucine rich repeat containing 7 [Source:HGNC Symbol;Acc:HGNC:18531]	PDZ	111	103	1	4	0.213468	0.220426	0.0034503	0.0104247
ENSG00000132122	188.697	163.136	18.0905	18.7826	3.25331	5.50149e-07	5.78784e-06	SPATA6	1	48295372	48472208	-	5939	protein_coding	spermatogenesis associated 6 [Source:HGNC Symbol;Acc:HGNC:18309]	-	247	191	13	18	1.1719	1.00842	0.110658	0.115733
ENSG00000117245	212.38	185.343	26.44	16.6956	3.21678	5.53386e-07	5.81671e-06	KIF17	1	20664014	20718017	-	4470	protein_coding	kinesin family member 17 [Source:HGNC Symbol;Acc:HGNC:19167]	Kinesin	278	217	19	16	1.75244	1.52221	0.214882	0.136682
ENSG00000135052	4207.11	4084.39	651.259	838.956	2.47575	5.64227e-07	5.92276e-06	GOLM1	9	86026146	86100173	-	4233	protein_coding	golgi membrane protein 1 [Source:HGNC Symbol;Acc:HGNC:15451]	-	5507	4782	468	804	36.6584	35.4229	5.58922	7.25281
ENSG00000048028	1929.75	1897.85	219.869	388.174	2.65253	5.65767e-07	5.93628e-06	USP28	11	113797874	113875570	-	5719	protein_coding	ubiquitin specific peptidase 28 [Source:HGNC Symbol;Acc:HGNC:12625]	UCH	2526	2222	158	372	12.4457	12.1828	1.39666	2.48383
ENSG00000144395	750.969	730.27	19.4821	110.609	3.49825	5.70987e-07	5.98839e-06	CCDC150	2	196639554	196763490	+	9683	protein_coding	coiled-coil domain containing 150 [Source:HGNC Symbol;Acc:HGNC:26834]	-	983	855	14	106	2.86055	2.76872	0.0730923	0.418018
ENSG00000168913	250.578	245.131	36.181	25.0435	3.02506	5.85629e-07	6.12834e-06	ENHO	9	34521040	34523041	-	1082	protein_coding	energy homeostasis associated [Source:HGNC Symbol;Acc:HGNC:24838]	-	328	287	26	24	8.54187	8.3172	1.21479	0.846999
ENSG00000196569	146.68	110.181	12.5242	7.30435	3.7166	5.91231e-07	6.18422e-06	LAMA2	6	128883141	129516569	+	10358	protein_coding	laminin subunit alpha 2 [Source:HGNC Symbol;Acc:HGNC:6482]	Laminin_G_2	192	129	9	7	0.522314	0.390514	0.0439259	0.025806
ENSG00000119638	6311.04	6226.51	1225.98	1108.17	2.42538	5.91495e-07	6.18424e-06	NEK9	14	75079353	75127344	-	10787	protein_coding	NIMA related kinase 9 [Source:HGNC Symbol;Acc:HGNC:18591]	Pkinase	8261	7290	881	1062	21.5794	21.1909	4.12885	3.75944
ENSG00000276386	65.7003	67.4752	0	0	8.23075	6.01099e-07	6.28187e-06	CNTNAP3P2	9	67059560	67293468	+	3861	unprocessed_pseudogene	contactin associated protein-like 3 pseudogene 2 [Source:HGNC Symbol;Acc:HGNC:49589]	Laminin_G_2	86	79	0	0	0.627632	0.641579	0	0
ENSG00000272645	652.419	648.274	109.935	103.304	2.60927	6.01452e-07	6.28278e-06	GTF2IP20	1	223951394	223992594	-	4145	transcribed_unprocessed_pseudogene	general transcription factor IIi pseudogene 20 [Source:HGNC Symbol;Acc:HGNC:51732]	-	854	759	79	99	5.8055	5.74169	0.96351	0.912031
ENSG00000107295	72.5759	60.6423	0	0	8.23153	6.10394e-07	6.36774e-06	SH3GL2	9	17579082	17797129	+	2682	protein_coding	SH3 domain containing GRB2 like 2, endophilin A1 [Source:HGNC Symbol;Acc:HGNC:10831]	SH3_2	95	71	0	0	0.998094	0.830084	0	0
ENSG00000203965	378.158	424.496	2.78316	45.913	4.01635	6.10845e-07	6.36962e-06	EFCAB7	1	63523372	63572693	+	5704	protein_coding	EF-hand calcium binding domain 7 [Source:HGNC Symbol;Acc:HGNC:29379]	-	495	497	2	44	2.4453	2.73212	0.0177257	0.294559
ENSG00000036448	61.8805	70.8917	0	0	8.22621	6.19329e-07	6.45524e-06	MYOM2	8	2045040	2165552	+	7062	protein_coding	myomesin 2 [Source:HGNC Symbol;Acc:HGNC:7614]	I-set	81	83	0	0	0.323194	0.36853	0	0
ENSG00000182118	674.574	664.503	119.676	99.1304	2.61509	6.3331e-07	6.58933e-06	FAM89A	1	231018958	231040246	-	2394	protein_coding	family with sequence similarity 89 member A [Source:HGNC Symbol;Acc:HGNC:25057]	-	883	778	86	95	10.393	10.1901	1.81605	1.5153
ENSG00000106080	1293.38	1286.3	64.0126	228.522	3.13557	6.42741e-07	6.68451e-06	FKBP14	7	30010587	30026684	-	5326	protein_coding	FK506 binding protein 14 [Source:HGNC Symbol;Acc:HGNC:18625]	FKBP_C	1693	1506	46	219	8.95699	8.86638	0.436627	1.57015
ENSG00000154556	123.761	124.701	1.39158	0	7.6833	6.52824e-07	6.78638e-06	SORBS2	4	185585444	185956652	-	16730	protein_coding	sorbin and SH3 domain containing 2 [Source:HGNC Symbol;Acc:HGNC:24098]	SH3_1	162	146	1	0	0.272851	0.27364	0.00302174	0
ENSG00000150625	80.2154	83.7034	1.39158	3.13043	5.12724	6.63003e-07	6.88614e-06	GPM6A	4	175632934	176002664	-	7040	protein_coding	glycoprotein M6A [Source:HGNC Symbol;Acc:HGNC:4460]	-	105	98	1	3	0.420265	0.436492	0.00718094	0.0162722
ENSG00000102287	50.4211	83.7034	0	0	8.2403	6.66125e-07	6.91552e-06	GABRE	X	151953124	151974680	-	9612	protein_coding	gamma-aminobutyric acid type A receptor epsilon subunit [Source:HGNC Symbol;Acc:HGNC:4085]	Neur_chan_LBD	66	98	0	0	0.19348	0.319694	0	0
ENSG00000243970	219.256	212.675	23.6568	28.1739	3.05481	6.76468e-07	7.01672e-06	PPIEL	1	39522280	39559671	-	3613	transcribed_unprocessed_pseudogene	peptidylprolyl isomerase E like pseudogene [Source:HGNC Symbol;Acc:HGNC:33195]	-	287	249	17	27	2.23831	2.161	0.237867	0.285361
ENSG00000137571	225.367	224.633	30.6147	6.26087	3.64121	6.81113e-07	7.0587e-06	SLCO5A1	8	69667047	69835064	-	9992	protein_coding	solute carrier organic anion transporter family member 5A1 [Source:HGNC Symbol;Acc:HGNC:19046]	-	295	263	22	6	0.831909	0.825327	0.111307	0.0229297
ENSG00000225492	66.4642	64.0587	0	0	8.20183	6.82461e-07	7.06957e-06	GBP1P1	1	89407679	89426243	+	2352	transcribed_unprocessed_pseudogene	guanylate binding protein 1 pseudogene 1 [Source:HGNC Symbol;Acc:HGNC:39561]	-	87	75	0	0	1.04229	0.999877	0	0
ENSG00000224204	71.8119	58.934	0	0	8.20454	6.89371e-07	7.13802e-06	PHEX-AS1	X	22162733	22172983	-	1906	antisense	PHEX antisense RNA 1 [Source:HGNC Symbol;Acc:HGNC:40445]	-	94	69	0	0	1.38967	1.13514	0	0
ENSG00000152749	1527.15	1594.64	168.381	317.217	2.68231	6.97674e-07	7.21449e-06	GPR180	13	94601903	94634645	+	8822	protein_coding	G protein-coupled receptor 180 [Source:HGNC Symbol;Acc:HGNC:28899]	-	1999	1867	121	304	6.38487	6.6359	0.693381	1.31585
ENSG00000102385	100.078	113.597	5.56632	8.34782	3.92219	7.128e-07	7.35802e-06	DRP2	X	101219769	101264497	+	8187	protein_coding	dystrophin related protein 2 [Source:HGNC Symbol;Acc:HGNC:3032]	ZZ	131	133	4	8	0.450872	0.509389	0.0246995	0.0373133
ENSG00000177272	71.8119	58.0799	0	0	8.19511	7.20738e-07	7.43671e-06	KCNA3	1	110672465	110675033	-	2569	protein_coding	potassium voltage-gated channel subfamily A member 3 [Source:HGNC Symbol;Acc:HGNC:6221]	Ion_trans	94	68	0	0	1.03103	0.82998	0	0
ENSG00000142494	538.589	546.635	87.6695	87.6521	2.62991	7.24373e-07	7.47094e-06	SLC47A1	17	19495385	19579034	+	5719	protein_coding	solute carrier family 47 member 1 [Source:HGNC Symbol;Acc:HGNC:25588]	MatE	705	640	63	84	3.47357	3.50899	0.556896	0.560865
ENSG00000010319	294.123	263.922	43.1389	30.2609	2.93319	7.35253e-07	7.57654e-06	SEMA3G	3	52433053	52445085	-	5011	protein_coding	semaphorin 3G [Source:HGNC Symbol;Acc:HGNC:30400]	Sema	385	309	31	29	2.16492	1.93356	0.312745	0.22099
ENSG00000178445	443.859	397.164	70.9705	55.3043	2.73882	7.41933e-07	7.63871e-06	GLDC	9	6532464	6645783	-	8939	protein_coding	glycine decarboxylase [Source:HGNC Symbol;Acc:HGNC:4313]	Beta_elim_lyase	581	465	51	53	1.83144	1.63112	0.288426	0.226405
ENSG00000128394	159.667	154.595	19.4821	5.21739	3.70787	7.43628e-07	7.64949e-06	APOBEC3F	22	39040604	39053910	+	3242	protein_coding	apolipoprotein B mRNA editing enzyme catalytic subunit 3F [Source:HGNC Symbol;Acc:HGNC:17356]	-	209	181	14	5	1.81652	1.7506	0.218308	0.0588919
ENSG00000254560	74.8677	87.974	2.78316	1.04348	5.48048	7.45213e-07	7.66245e-06	BBOX1-AS1	11	27047186	27220113	-	1312	antisense	BBOX1 antisense RNA 1 [Source:HGNC Symbol;Acc:HGNC:50700]	-	98	103	2	1	2.10474	2.46165	0.0770637	0.0291048
ENSG00000106013	54.2409	75.1623	0	0	8.18884	7.66816e-07	7.87429e-06	ANKRD7	7	118214669	118496171	+	3043	protein_coding	ankyrin repeat domain 7 [Source:HGNC Symbol;Acc:HGNC:18588]	-	71	88	0	0	0.65745	0.906783	0	0
ENSG00000197587	210.852	210.113	30.6147	16.6956	3.16778	7.72479e-07	7.92554e-06	DMBX1	1	46506996	46514226	+	2896	protein_coding	diencephalon/mesencephalon homeobox 1 [Source:HGNC Symbol;Acc:HGNC:19026]	Homeobox	276	246	22	16	2.68545	2.66354	0.384041	0.21097
ENSG00000185015	106.19	110.181	4.17474	9.3913	3.96048	7.77505e-07	7.97365e-06	CA13	8	85220587	85284073	+	5528	protein_coding	carbonic anhydrase 13 [Source:HGNC Symbol;Acc:HGNC:14914]	-	139	129	3	9	0.708522	0.731719	0.0274351	0.0621689
ENSG00000121644	3860.27	4028.87	300.581	790.956	2.85222	7.83501e-07	8.03165e-06	DESI2	1	244652935	244709033	+	5104	protein_coding	desumoylating isopeptidase 2 [Source:HGNC Symbol;Acc:HGNC:24264]	-	5053	4717	216	758	27.8962	28.9786	2.13942	5.67097
ENSG00000131480	211.616	248.548	34.7895	15.6522	3.20639	7.92137e-07	8.10961e-06	AOC2	17	42844600	42850707	+	2657	protein_coding	amine oxidase, copper containing 2 [Source:HGNC Symbol;Acc:HGNC:549]	-	277	291	25	15	2.93761	3.43419	0.475666	0.215575
ENSG00000156042	110.774	126.409	2.78316	11.4783	4.00423	7.93087e-07	8.11582e-06	CFAP70	10	73253759	73358859	-	7428	protein_coding	cilia and flagella associated protein 70 [Source:HGNC Symbol;Acc:HGNC:30726]	-	145	148	2	11	0.55005	0.624759	0.0136117	0.0565483
ENSG00000134569	825.837	797.745	150.291	51.1304	3.01758	7.9744e-07	8.15329e-06	LRP4	11	46856868	46918642	-	8597	protein_coding	LDL receptor related protein 4 [Source:HGNC Symbol;Acc:HGNC:6696]	Ldl_recept_a	1081	934	108	49	3.54311	3.40661	0.635083	0.217645
ENSG00000259863	72.5759	55.5176	0	0	8.17508	7.98963e-07	8.16533e-06	SH3RF3-AS1	2	109127327	109128930	-	1604	lincRNA	SH3RF3 antisense RNA 1 [Source:HGNC Symbol;Acc:HGNC:44168]	-	95	65	0	0	1.66888	1.27067	0	0
ENSG00000138675	67.2282	59.7882	0	0	8.16267	8.15354e-07	8.32204e-06	FGF5	4	80266599	80336680	+	5998	protein_coding	fibroblast growth factor 5 [Source:HGNC Symbol;Acc:HGNC:3683]	-	88	70	0	0	0.413412	0.365944	0	0
ENSG00000239474	62.6444	64.0587	0	0	8.15888	8.22428e-07	8.38336e-06	KLHL41	2	169509702	169526262	+	2620	protein_coding	kelch like family member 41 [Source:HGNC Symbol;Acc:HGNC:16905]	BACK	82	75	0	0	0.881899	0.897599	0	0
ENSG00000144730	315.514	302.357	41.7474	45.913	2.81573	8.24194e-07	8.39774e-06	IL17RD	3	57089982	57170306	-	9561	protein_coding	interleukin 17 receptor D [Source:HGNC Symbol;Acc:HGNC:17616]	-	413	354	30	44	1.21718	1.16097	0.158625	0.175731
ENSG00000117425	113.83	107.619	9.74105	6.26087	3.81	8.30489e-07	8.45823e-06	PTCH2	1	44819844	44843063	-	5149	protein_coding	patched 2 [Source:HGNC Symbol;Acc:HGNC:9586]	-	149	126	7	6	0.815398	0.767309	0.0687272	0.0444966
ENSG00000147224	8320.25	8117.52	1610.06	1541.22	2.38304	8.31092e-07	8.46072e-06	PRPS1	X	107628424	107651026	+	2623	protein_coding	phosphoribosyl pyrophosphate synthetase 1 [Source:HGNC Symbol;Acc:HGNC:9462]	-	10891	9504	1157	1477	116.997	113.614	22.2992	21.5021
novel.181	181.822	175.948	15.3074	22.9565	3.21392	8.34134e-07	8.48585e-06	-	7	149185147	149190999	+	5853	-	-	-	238	206	11	22	1.14579	1.1036	0.0950097	0.14353
ENSG00000117020	231.479	53.8093	0	1.04348	7.90581	8.34279e-07	8.48585e-06	AKT3	1	243488233	243851079	-	9475	protein_coding	AKT serine/threonine kinase 3 [Source:HGNC Symbol;Acc:HGNC:393]	Pkinase	303	63	0	1	0.901093	0.208489	0	0.00403014
ENSG00000164853	73.3398	53.8093	0	0	8.16447	8.48612e-07	8.62542e-06	UNCX	7	1232907	1237318	+	2048	protein_coding	UNC homeobox [Source:HGNC Symbol;Acc:HGNC:33194]	Homeobox	96	63	0	0	1.32083	0.964569	0	0
ENSG00000170464	634.848	675.606	61.2295	125.217	2.80754	8.504e-07	8.63866e-06	DNAJC18	5	139408588	139444491	-	6499	protein_coding	DnaJ heat shock protein family (Hsp40) member C18 [Source:HGNC Symbol;Acc:HGNC:28429]	DnaJ	831	791	44	120	3.60297	3.81639	0.342263	0.705072
ENSG00000144642	121.469	115.306	0	1.04348	7.63364	8.61512e-07	8.74401e-06	RBMS3	3	28574791	30010391	+	18339	protein_coding	RNA binding motif single stranded interacting protein 3 [Source:HGNC Symbol;Acc:HGNC:13427]	RRM_1	159	135	0	1	0.244302	0.230824	0	0.0020822
ENSG00000125820	80.2154	95.6611	0	2.08696	6.2397	8.74263e-07	8.862e-06	NKX2-2	20	21511010	21514026	-	2092	protein_coding	NK2 homeobox 2 [Source:HGNC Symbol;Acc:HGNC:7835]	Homeobox	105	112	0	2	1.41428	1.67872	0	0.0365062
ENSG00000170915	475.945	431.329	52.88	81.3913	2.75145	8.79077e-07	8.90698e-06	PAQR8	6	52361421	52407777	+	5057	protein_coding	progestin and adipoQ receptor family member 8 [Source:HGNC Symbol;Acc:HGNC:15708]	-	623	505	38	78	3.47137	3.13127	0.379878	0.58898
ENSG00000234420	1784.6	1812.44	194.821	374.609	2.65726	8.9787e-07	9.08569e-06	ZNF37BP	10	42513510	42552822	-	10256	transcribed_processed_pseudogene	zinc finger protein 37B, pseudogene [Source:HGNC Symbol;Acc:HGNC:13103]	-	2336	2122	140	359	6.41802	6.48769	0.690087	1.33664
ENSG00000269586	64.1723	60.6423	0	0	8.13734	9.0475e-07	9.14747e-06	CT45A10	X	135881063	135889086	-	1012	protein_coding	cancer/testis antigen family 45 member A10 [Source:HGNC Symbol;Acc:HGNC:51263]	-	84	71	0	0	2.33887	2.19989	0	0
ENSG00000145246	378.158	367.27	51.4884	60.5217	2.73218	9.18563e-07	9.27125e-06	ATP10D	4	47485288	47593486	+	7965	protein_coding	ATPase phospholipid transporting 10D (putative) [Source:HGNC Symbol;Acc:HGNC:13549]	-	495	430	37	58	1.75116	1.6928	0.234839	0.278062
ENSG00000154027	58.8247	65.767	0	0	8.13449	9.20318e-07	9.28499e-06	AK5	1	77282051	77559969	+	6919	protein_coding	adenylate kinase 5 [Source:HGNC Symbol;Acc:HGNC:365]	ADK	77	77	0	0	0.313584	0.348955	0	0
ENSG00000101746	59.5886	64.9129	0	0	8.13349	9.21776e-07	9.29572e-06	NOL4	18	33851100	34224952	-	5687	protein_coding	nucleolar protein 4 [Source:HGNC Symbol;Acc:HGNC:7870]	-	78	76	0	0	0.386472	0.419038	0	0
ENSG00000280916	93.9667	76.0164	1.39158	1.04348	6.14945	9.25387e-07	9.32815e-06	FOXCUT	6	1605531	1606079	+	333	lincRNA	FOXC1 upstream transcript (non-protein coding) [Source:HGNC Symbol;Acc:HGNC:50650]	-	123	89	1	1	10.408	8.38047	0.151813	0.114671
ENSG00000162643	75.6317	50.3929	0	0	8.15179	9.30712e-07	9.36983e-06	WDR63	1	84999147	85133138	+	3923	protein_coding	WD repeat domain 63 [Source:HGNC Symbol;Acc:HGNC:30711]	-	99	59	0	0	0.711088	0.471581	0	0
ENSG00000203705	734.926	702.938	90.4526	139.826	2.63925	9.35405e-07	9.40905e-06	TATDN3	1	212791828	212816626	+	3788	protein_coding	TatD DNase domain containing 3 [Source:HGNC Symbol;Acc:HGNC:27010]	-	962	823	65	134	7.15602	6.81259	0.867475	1.35081
ENSG00000235272	173.418	199.863	22.2653	20.8696	3.1149	9.47897e-07	9.52254e-06	FAM103A2P	6	166586124	166586477	-	354	processed_pseudogene	family with sequence similarity 103 member A2, pseudogene [Source:HGNC Symbol;Acc:HGNC:21234]	-	227	234	16	20	18.0688	20.7269	2.28492	2.15737
ENSG00000182901	60.3526	63.2046	0	0	8.12257	9.63859e-07	9.67054e-06	RGS7	1	240775515	241357230	-	2575	protein_coding	regulator of G protein signaling 7 [Source:HGNC Symbol;Acc:HGNC:10003]	RGS	79	74	0	0	0.864483	0.901108	0	0
ENSG00000084453	75.6317	49.5388	0	0	8.14201	9.78157e-07	9.80566e-06	SLCO1A2	12	21264600	21419594	-	11520	protein_coding	solute carrier organic anion transporter family member 1A2 [Source:HGNC Symbol;Acc:HGNC:10956]	-	99	58	0	0	0.242153	0.157869	0	0
ENSG00000152818	2971.03	2984.28	403.558	637.565	2.51519	9.80806e-07	9.82388e-06	UTRN	6	144285701	144853034	+	14604	protein_coding	utrophin [Source:HGNC Symbol;Acc:HGNC:12635]	CH	3889	3494	290	611	7.50365	7.50194	1.00388	1.5976
ENSG00000119042	1369.01	1316.19	268.575	212.87	2.48056	9.83939e-07	9.84798e-06	SATB2	2	199269500	199471266	-	10958	protein_coding	SATB homeobox 2 [Source:HGNC Symbol;Acc:HGNC:21637]	CUT	1792	1541	193	204	4.60801	4.40955	0.890389	0.710882
ENSG00000163808	202.448	223.779	16.6989	31.3043	3.13612	9.93927e-07	9.94264e-06	KIF15	3	44761717	44873376	+	5285	protein_coding	kinesin family member 15 [Source:HGNC Symbol;Acc:HGNC:17273]	Kinesin	265	262	12	30	1.41289	1.55446	0.114786	0.216758
ENSG00000157445	97.7864	70.8917	0	4.17391	5.20738	9.99815e-07	9.99307e-06	CACNA2D3	3	54122547	55074557	+	4670	protein_coding	calcium voltage-gated channel auxiliary subunit alpha2delta 3 [Source:HGNC Symbol;Acc:HGNC:15460]	-	128	83	0	4	0.772324	0.557293	0	0.0327071
ENSG00000142856	1697.51	1668.09	30.6147	243.13	3.61465	1.01113e-06	1.01019e-05	ITGB3BP	1	63440770	63593721	-	5459	protein_coding	integrin subunit beta 3 binding protein [Source:HGNC Symbol;Acc:HGNC:6157]	-	2222	1953	22	233	11.4693	11.2179	0.203734	1.62983
ENSG00000130649	190.989	196.447	22.2653	24	3.06402	1.01977e-06	1.01796e-05	CYP2E1	10	133520406	133561220	+	9621	protein_coding	cytochrome P450 family 2 subfamily E member 1 [Source:HGNC Symbol;Acc:HGNC:2631]	p450	250	230	16	23	0.732194	0.749601	0.0840724	0.0912865
ENSG00000122707	275.024	253.673	26.44	41.7391	2.94652	1.02186e-06	1.01961e-05	RECK	9	36036433	36124451	+	6045	protein_coding	reversion inducing cysteine rich protein with kazal motifs [Source:HGNC Symbol;Acc:HGNC:11345]	-	360	297	19	40	1.67808	1.54057	0.158895	0.252675
ENSG00000136542	63.4084	58.934	0	0	8.10851	1.02664e-06	1.02395e-05	GALNT5	2	157257598	157314211	+	6818	protein_coding	polypeptide N-acetylgalactosaminyltransferase 5 [Source:HGNC Symbol;Acc:HGNC:4127]	Glycos_transf_2	83	69	0	0	0.343026	0.317333	0	0
ENSG00000240280	57.2967	64.9129	0	0	8.10662	1.04033e-06	1.03673e-05	TCAM1P	17	63849292	63864379	+	3546	transcribed_unitary_pseudogene	testicular cell adhesion molecule 1, pseudogene [Source:HGNC Symbol;Acc:HGNC:30707]	-	75	76	0	0	0.595976	0.672044	0	0
ENSG00000185532	484.348	487.701	45.9221	90.7826	2.82286	1.04304e-06	1.03899e-05	PRKG1	10	50990891	52298350	+	12831	protein_coding	protein kinase, cGMP-dependent, type I [Source:HGNC Symbol;Acc:HGNC:9414]	Pkinase	634	571	33	87	1.39231	1.3954	0.130019	0.258915
ENSG00000169668	81.7433	75.1623	1.39158	3.13043	5.06472	1.04599e-06	1.04149e-05	BCRP2	22	21103016	21122285	+	5447	transcribed_unprocessed_pseudogene	breakpoint cluster region pseudogene 2 [Source:HGNC Symbol;Acc:HGNC:1015]	RhoGAP	107	88	1	3	0.553519	0.50658	0.00928103	0.0210311
ENSG00000123576	71.8119	51.247	0	0	8.11734	1.05053e-06	1.04515e-05	ESX1	X	104250038	104254933	-	1495	protein_coding	ESX homeobox 1 [Source:HGNC Symbol;Acc:HGNC:14865]	Homeobox	94	60	0	0	1.77171	1.25844	0	0
ENSG00000182771	325.445	281.004	47.3137	11.4783	3.38796	1.05055e-06	1.04515e-05	GRID1	10	85599555	86366493	-	5927	protein_coding	glutamate ionotropic receptor delta type subunit 1 [Source:HGNC Symbol;Acc:HGNC:4575]	ANF_receptor	426	329	34	11	2.02526	1.74054	0.29	0.070869
ENSG00000182912	132.164	152.033	16.6989	3.13043	3.89085	1.05469e-06	1.04883e-05	TSPEAR-AS2	21	44517216	44525952	+	3026	antisense	TSPEAR antisense RNA 2 [Source:HGNC Symbol;Acc:HGNC:16428]	-	173	178	12	3	1.61096	1.84448	0.200478	0.0378574
ENSG00000166257	63.4084	58.0799	0	0	8.09842	1.07392e-06	1.06705e-05	SCN3B	11	123629187	123655244	-	9464	protein_coding	sodium voltage-gated channel beta subunit 3 [Source:HGNC Symbol;Acc:HGNC:20665]	V-set	83	68	0	0	0.247121	0.225298	0	0
ENSG00000121236	211.616	200.717	15.3074	30.2609	3.16205	1.07757e-06	1.06905e-05	TRIM6	11	5596109	5612958	+	3947	protein_coding	tripartite motif containing 6 [Source:HGNC Symbol;Acc:HGNC:16277]	SPRY	277	235	11	29	1.97751	1.86691	0.14089	0.280563
ENSG00000122477	116.885	106.765	1.39158	10.4348	4.17363	1.0833e-06	1.07411e-05	LRRC39	1	100148449	100178273	-	1991	protein_coding	leucine rich repeat containing 39 [Source:HGNC Symbol;Acc:HGNC:28228]	-	153	125	1	10	2.16534	1.96862	0.0253912	0.191791
ENSG00000198054	64.9363	56.3717	0	0	8.09637	1.09098e-06	1.08127e-05	DSCR8	21	38121451	38156511	+	831	lincRNA	Down syndrome critical region 8 (non-protein coding) [Source:HGNC Symbol;Acc:HGNC:16707]	-	85	66	0	0	2.8822	2.49038	0	0
ENSG00000178343	87.091	78.5787	1.39158	1.04348	6.11219	1.09947e-06	1.08923e-05	SHISA3	4	42397839	42402487	+	1971	protein_coding	shisa family member 3 [Source:HGNC Symbol;Acc:HGNC:25159]	-	114	92	1	1	1.62976	1.4636	0.0256488	0.0193737
ENSG00000169635	1642.51	1645.88	343.72	159.652	2.7101	1.11093e-06	1.09965e-05	HIC2	22	21417404	21451463	+	7219	protein_coding	HIC ZBTB transcriptional repressor 2 [Source:HGNC Symbol;Acc:HGNC:18595]	BTB	2150	1927	247	153	8.39205	8.37003	1.72971	0.809307
ENSG00000158186	945.778	912.196	180.905	147.13	2.50303	1.12441e-06	1.11207e-05	MRAS	3	138347648	138405534	+	6365	protein_coding	muscle RAS oncogene homolog [Source:HGNC Symbol;Acc:HGNC:7227]	Ras	1238	1068	130	141	5.48061	5.26133	1.03252	0.845901
ENSG00000151470	449.206	443.286	18.0905	74.0869	3.26104	1.12902e-06	1.11523e-05	C4orf33	4	129093317	129116640	+	7015	protein_coding	chromosome 4 open reading frame 33 [Source:HGNC Symbol;Acc:HGNC:27025]	-	588	519	13	71	2.36187	2.31986	0.0936849	0.386482
ENSG00000233639	58.8247	61.4964	0	0	8.08428	1.13777e-06	1.1234e-05	LINC01158	2	104807572	104853183	-	844	processed_transcript	long intergenic non-protein coding RNA 1158 [Source:HGNC Symbol;Acc:HGNC:49513]	-	77	72	0	0	2.57072	2.67493	0	0
ENSG00000102003	412.537	397.164	70.9705	54.2609	2.69624	1.15954e-06	1.14298e-05	SYP	X	49187804	49200259	-	5215	protein_coding	synaptophysin [Source:HGNC Symbol;Acc:HGNC:11506]	-	540	465	51	52	2.91774	2.7959	0.49439	0.380757
ENSG00000173404	86.3271	77.7246	2.78316	4.17391	4.53573	1.1714e-06	1.15419e-05	INSM1	20	20368121	20370949	+	2829	protein_coding	INSM transcriptional repressor 1 [Source:HGNC Symbol;Acc:HGNC:6090]	-	113	91	2	4	1.12552	1.00863	0.0357397	0.0539916
ENSG00000148541	80.9794	82.8493	1.39158	1.04348	6.09587	1.19071e-06	1.17175e-05	FAM13C	10	59246129	59363181	-	6753	protein_coding	family with sequence similarity 13 member C [Source:HGNC Symbol;Acc:HGNC:19371]	-	106	97	1	1	0.442299	0.450399	0.00748612	0.0056546
ENSG00000244586	88.619	91.3905	6.95789	2.08696	4.37512	1.20591e-06	1.18522e-05	WNT5A-AS1	3	55487699	55488308	+	500	antisense	WNT5A antisense RNA 1 [Source:HGNC Symbol;Acc:HGNC:40616]	-	116	107	5	2	6.53724	6.71021	0.505538	0.152742
ENSG00000099256	1165.03	1219.68	69.5789	227.478	3.00022	1.2275e-06	1.20544e-05	PRTFDC1	10	24848607	24952604	-	2329	protein_coding	phosphoribosyl transferase domain containing 1 [Source:HGNC Symbol;Acc:HGNC:23333]	Pribosyltran	1525	1428	50	218	18.4504	19.2257	1.08531	3.57426
ENSG00000264125	52.713	66.6211	0	0	8.0721	1.23324e-06	1.21057e-05	AC104984.1	17	30204318	30206468	+	697	antisense	-	-	69	78	0	0	2.78948	3.50901	0	0
ENSG00000133019	91.6748	87.974	6.95789	2.08696	4.3723	1.23558e-06	1.21236e-05	CHRM3	1	239386565	239915452	+	12170	protein_coding	cholinergic receptor muscarinic 3 [Source:HGNC Symbol;Acc:HGNC:1952]	-	120	103	5	2	0.277841	0.265381	0.0207698	0.00627535
ENSG00000232022	72.5759	47.8305	0	0	8.08602	1.24075e-06	1.21694e-05	FAAHP1	1	46432129	46482493	+	2476	transcribed_unprocessed_pseudogene	fatty acid amide hydrolase pseudogene 1 [Source:HGNC Symbol;Acc:HGNC:50679]	-	95	56	0	0	1.08113	0.709186	0	0
ENSG00000176971	50.4211	69.1834	0	0	8.07524	1.24813e-06	1.22367e-05	FIBIN	11	26994184	26996121	+	1938	protein_coding	fin bud initiation factor homolog (zebrafish) [Source:HGNC Symbol;Acc:HGNC:33747]	-	66	81	0	0	0.959614	1.31055	0	0
ENSG00000143355	77.1596	89.6822	2.78316	0	6.07743	1.29973e-06	1.27267e-05	LHX9	1	197911902	197935478	+	10442	protein_coding	LIM homeobox 9 [Source:HGNC Symbol;Acc:HGNC:14222]	Homeobox	101	105	2	0	0.272549	0.315303	0.00968278	0
ENSG00000183688	96.2585	93.9528	4.17474	7.30435	4.02378	1.30815e-06	1.28038e-05	RFLNB	17	439978	445939	-	3621	protein_coding	refilin B [Source:HGNC Symbol;Acc:HGNC:28705]	-	126	110	3	7	0.980502	0.952548	0.0418838	0.073819
ENSG00000175868	113.066	106.765	1.39158	0	7.50614	1.33115e-06	1.30128e-05	CALCB	11	14904997	15082342	+	3937	protein_coding	calcitonin related polypeptide beta [Source:HGNC Symbol;Acc:HGNC:1438]	-	148	125	1	0	1.05926	0.995559	0.0128407	0
ENSG00000116132	62.6444	54.6635	0	0	8.04799	1.34354e-06	1.31068e-05	PRRX1	1	170662728	170739419	+	8246	protein_coding	paired related homeobox 1 [Source:HGNC Symbol;Acc:HGNC:9142]	Homeobox	82	64	0	0	0.280206	0.243366	0	0
ENSG00000144214	80.9794	80.287	1.39158	1.04348	6.07314	1.34743e-06	1.31393e-05	LYG1	2	99284238	99304742	-	1093	protein_coding	lysozyme g1 [Source:HGNC Symbol;Acc:HGNC:27014]	-	106	94	1	1	2.7327	2.69669	0.0462523	0.0349364
ENSG00000204172	661.586	713.187	136.375	92.8695	2.58713	1.35474e-06	1.32051e-05	AGAP9	10	47501854	47523638	-	2387	protein_coding	ArfGAP with GTPase domain, ankyrin repeat and PH domain 9 [Source:HGNC Symbol;Acc:HGNC:23463]	-	866	835	98	89	10.2228	10.9687	2.07552	1.42376
ENSG00000151692	714.299	702.084	143.333	83.4782	2.64659	1.35929e-06	1.32385e-05	RNF144A	2	6917392	7068286	+	6473	protein_coding	ring finger protein 144A [Source:HGNC Symbol;Acc:HGNC:20457]	IBR	935	822	103	80	4.07017	3.98189	0.804425	0.471936
ENSG00000118965	1285.74	1193.2	128.025	259.826	2.67323	1.36028e-06	1.32427e-05	WDR35	2	19910260	19990131	-	7836	protein_coding	WD repeat domain 35 [Source:HGNC Symbol;Acc:HGNC:29250]	-	1683	1397	92	249	6.05196	5.59016	0.593536	1.2134
ENSG00000164116	175.71	165.699	18.0905	20.8696	3.12752	1.37342e-06	1.33596e-05	GUCY1A1	4	155666711	155732349	+	5766	protein_coding	guanylate cyclase 1 soluble subunit alpha 1 [Source:HGNC Symbol;Acc:HGNC:4685]	Guanylate_cyc	230	194	13	20	1.12398	1.05499	0.113978	0.132451
ENSG00000137726	137.512	143.492	15.3074	1.04348	4.16922	1.38605e-06	1.34658e-05	FXYD6	11	117836976	117877486	-	5137	protein_coding	FXYD domain containing ion transport regulator 6 [Source:HGNC Symbol;Acc:HGNC:4030]	-	180	168	11	1	0.987346	1.02547	0.108252	0.00743343
ENSG00000128512	629.5	669.627	84.8863	128.348	2.60371	1.40981e-06	1.36797e-05	DOCK4	7	111726110	112206411	-	11499	protein_coding	dedicator of cytokinesis 4 [Source:HGNC Symbol;Acc:HGNC:19192]	Ded_cyto	824	784	61	123	2.01917	2.13786	0.268178	0.408455
ENSG00000137959	71.048	79.4328	1.39158	2.08696	5.4052	1.42232e-06	1.37955e-05	IFI44L	1	78619922	78646145	+	10240	protein_coding	interferon induced protein 44 like [Source:HGNC Symbol;Acc:HGNC:17817]	-	93	93	1	2	0.255911	0.284777	0.00493689	0.00745811
ENSG00000224081	84.0352	73.454	4.17474	2.08696	4.69553	1.43819e-06	1.3938e-05	SLC44A3-AS1	1	94613814	94855426	-	10245	transcribed_processed_pseudogene	SLC44A3 antisense RNA 1 [Source:HGNC Symbol;Acc:HGNC:49057]	-	110	86	3	2	0.302543	0.263214	0.0148035	0.00745447
ENSG00000117122	395.729	411.684	75.1453	32.3478	2.9191	1.45176e-06	1.40636e-05	MFAP2	1	16974502	16980835	-	2915	protein_coding	microfibril associated protein 2 [Source:HGNC Symbol;Acc:HGNC:7033]	-	518	482	54	31	5.00723	5.18479	0.936502	0.40609
ENSG00000164841	77.9236	86.2658	0	2.08696	6.14145	1.47342e-06	1.42443e-05	TMEM74	8	108606850	108787615	-	2877	protein_coding	transmembrane protein 74 [Source:HGNC Symbol;Acc:HGNC:26409]	-	102	101	0	2	0.999003	1.10079	0	0.0265454
ENSG00000149269	1627.23	1636.49	268.575	340.174	2.42181	1.48714e-06	1.43652e-05	PAK1	11	77321707	77474635	-	6299	protein_coding	p21 (RAC1) activated kinase 1 [Source:HGNC Symbol;Acc:HGNC:8590]	Pkinase	2130	1916	193	326	9.52828	9.53776	1.54896	1.97626
ENSG00000129680	2670.03	2682.78	315.888	588.522	2.56403	1.49712e-06	1.44556e-05	MAP7D3	X	136213220	136256482	-	7067	protein_coding	MAP7 domain containing 3 [Source:HGNC Symbol;Acc:HGNC:25742]	-	3495	3141	227	564	13.9354	13.9366	1.62384	3.04749
ENSG00000106688	213.144	214.383	33.3979	18.7826	3.04715	1.50942e-06	1.45684e-05	SLC1A1	9	4490444	4587469	+	3998	protein_coding	solute carrier family 1 member 1 [Source:HGNC Symbol;Acc:HGNC:10939]	SDF	279	251	24	18	1.96638	1.96858	0.303474	0.171921
ENSG00000139187	84.7992	105.91	0	7.30435	4.60216	1.53435e-06	1.47848e-05	KLRG1	12	8950044	9010760	+	2598	protein_coding	killer cell lectin like receptor G1 [Source:HGNC Symbol;Acc:HGNC:6380]	-	111	124	0	7	1.2039	1.4966	0	0.102886
ENSG00000117697	1557.71	1562.18	139.158	328.696	2.73462	1.55098e-06	1.49207e-05	NSL1	1	212726153	212791782	-	4091	protein_coding	NSL1, MIS12 kinetochore complex component [Source:HGNC Symbol;Acc:HGNC:24548]	-	2039	1829	100	315	14.0441	14.0187	1.23573	2.94022
ENSG00000122592	179.53	140.075	11.1326	20.8696	3.30245	1.56667e-06	1.50655e-05	HOXA7	7	27153716	27157936	-	2411	protein_coding	homeobox A7 [Source:HGNC Symbol;Acc:HGNC:5108]	Homeobox	235	164	8	20	2.74648	2.13289	0.167744	0.316761
ENSG00000235531	60.3526	52.9552	0	0	7.99793	1.66529e-06	1.59814e-05	MSC-AS1	8	71828167	72118393	+	6284	antisense	MSC antisense RNA 1 [Source:HGNC Symbol;Acc:HGNC:48724]	-	79	62	0	0	0.35424	0.30937	0	0
ENSG00000283709	63.4084	96.5152	1.39158	1.04348	6.06025	1.68019e-06	1.61047e-05	FAM238C	10	26931206	26944418	-	5545	transcribed_unprocessed_pseudogene	family with sequence similarity 238 member C (non-protein coding) [Source:HGNC Symbol;Acc:HGNC:24672]	-	83	113	1	1	0.421777	0.638998	0.009117	0.00688648
ENSG00000149289	395.729	359.583	44.5305	68.8695	2.73001	1.68849e-06	1.61777e-05	ZC3H12C	11	110093361	110171841	+	9719	protein_coding	zinc finger CCCH-type containing 12C [Source:HGNC Symbol;Acc:HGNC:29362]	-	518	421	32	66	1.50181	1.35826	0.166449	0.259311
ENSG00000100154	1422.49	1331.57	288.057	223.304	2.43014	1.68935e-06	1.61794e-05	TTC28	22	27978014	28679865	-	12645	protein_coding	tetratricopeptide repeat domain 28 [Source:HGNC Symbol;Acc:HGNC:29179]	-	1862	1559	207	214	4.14923	3.86589	0.827571	0.64624
ENSG00000146414	1774.67	1713.36	247.701	379.826	2.47337	1.69008e-06	1.61798e-05	SHPRH	6	145864245	145964423	-	17637	protein_coding	SNF2 histone linker PHD RING helicase [Source:HGNC Symbol;Acc:HGNC:19336]	SNF2_N	2323	2006	178	364	3.71134	3.56639	0.51021	0.788089
ENSG00000226530	58.0607	54.6635	0	0	7.99036	1.70796e-06	1.63311e-05	AL158055.1	X	51396511	51465661	+	841	lincRNA	-	-	76	64	0	0	2.54638	2.3862	0	0
ENSG00000269113	157.375	110.181	13.9158	11.4783	3.40433	1.71893e-06	1.64232e-05	TRABD2B	1	47760528	47996895	-	7034	protein_coding	TraB domain containing 2B [Source:HGNC Symbol;Acc:HGNC:44200]	-	206	129	10	11	0.825223	0.575056	0.0718706	0.0597158
ENSG00000095587	90.1469	101.64	5.56632	7.30435	3.88439	1.72169e-06	1.64424e-05	TLL2	10	96364606	96513918	-	8151	protein_coding	tolloid like 2 [Source:HGNC Symbol;Acc:HGNC:11844]	Astacin	118	119	4	7	0.407922	0.457782	0.0248086	0.0327934
ENSG00000256943	110.01	99.9316	1.39158	0	7.43953	1.73963e-06	1.6607e-05	AC148477.3	12	132275391	132278329	+	1819	antisense	-	-	144	117	1	0	2.23067	2.01686	0.0277921	0
ENSG00000186564	351.42	312.607	52.88	50.0869	2.68995	1.79673e-06	1.71244e-05	FOXD2	1	47436017	47440691	+	4675	protein_coding	forkhead box D2 [Source:HGNC Symbol;Acc:HGNC:3803]	Fork_head	460	366	38	48	2.77257	2.45483	0.410918	0.392065
ENSG00000258053	65.7003	46.9764	0	0	7.9902	1.81172e-06	1.72534e-05	AC025575.2	12	71047402	71118247	-	565	lincRNA	-	-	86	55	0	0	4.289	3.05237	0	0
ENSG00000079150	346.072	384.352	16.6989	62.6087	3.18737	1.81634e-06	1.72903e-05	FKBP7	2	178463664	178478600	-	3080	protein_coding	FK506 binding protein 7 [Source:HGNC Symbol;Acc:HGNC:3723]	FKBP_C	453	450	12	60	4.14433	4.58125	0.196963	0.743874
ENSG00000064309	706.66	741.373	101.585	147.13	2.53888	1.81739e-06	1.72935e-05	CDON	11	125955796	126063335	-	10600	protein_coding	cell adhesion associated, oncogene regulated [Source:HGNC Symbol;Acc:HGNC:17104]	fn3	925	868	73	141	2.45891	2.56765	0.348153	0.50794
ENSG00000091428	190.989	148.616	19.4821	19.8261	3.11075	1.82617e-06	1.73699e-05	RAPGEF4	2	172735274	173052893	+	7129	protein_coding	Rap guanine nucleotide exchange factor 4 [Source:HGNC Symbol;Acc:HGNC:16626]	cNMP_binding	250	174	14	19	0.988138	0.76532	0.099278	0.101771
ENSG00000144821	65.7003	83.7034	1.39158	3.13043	4.99412	1.83355e-06	1.74261e-05	MYH15	3	108380369	108529322	-	7694	protein_coding	myosin heavy chain 15 [Source:HGNC Symbol;Acc:HGNC:31073]	Myosin_head	86	98	1	3	0.314958	0.399389	0.00657055	0.0148891
ENSG00000186522	1857.18	1813.29	137.766	382.956	2.81471	1.85799e-06	1.7623e-05	2023-09-10	2	109542982	109614206	-	4131	protein_coding	septin 10 [Source:HGNC Symbol;Acc:HGNC:14349]	GTP_CDC	2431	2123	99	367	16.582	16.1145	1.21153	3.39242
ENSG00000145819	401.077	379.228	48.7053	72	2.68764	1.8726e-06	1.77544e-05	ARHGAP26	5	142770377	143229011	+	17158	protein_coding	Rho GTPase activating protein 26 [Source:HGNC Symbol;Acc:HGNC:17073]	RhoGAP	525	444	35	69	0.862182	0.811407	0.103123	0.153561
ENSG00000154065	110.01	124.701	6.95789	12.5217	3.56875	1.90274e-06	1.80257e-05	ANKRD29	18	23598926	23662885	-	6391	protein_coding	ankyrin repeat domain 29 [Source:HGNC Symbol;Acc:HGNC:27110]	-	144	146	5	12	0.634892	0.716319	0.0395508	0.0716987
ENSG00000122483	1058.08	1042.88	29.2232	175.304	3.35354	1.92761e-06	1.82466e-05	CCDC18	1	93179919	93278730	+	5633	protein_coding	coiled-coil domain containing 18 [Source:HGNC Symbol;Acc:HGNC:30370]	-	1385	1221	21	168	6.92814	6.79671	0.188466	1.13885
ENSG00000146281	2655.51	2700.72	246.309	584.348	2.6873	1.94089e-06	1.83502e-05	PM20D2	6	89146050	89165565	+	4708	protein_coding	peptidase M20 domain containing 2 [Source:HGNC Symbol;Acc:HGNC:21408]	Peptidase_M20	3476	3162	177	560	20.8041	21.0595	1.9006	4.54203
ENSG00000109705	335.377	409.122	55.6632	62.6087	2.65247	2.0241e-06	1.90987e-05	NKX3-2	4	13540830	13545050	-	2801	protein_coding	NK3 homeobox 2 [Source:HGNC Symbol;Acc:HGNC:951]	Homeobox	439	479	40	60	4.41629	5.36222	0.721939	0.817969
ENSG00000078053	568.384	579.091	76.5368	114.783	2.58085	2.04113e-06	1.9244e-05	AMPH	7	38383704	38631567	-	5636	protein_coding	amphiphysin [Source:HGNC Symbol;Acc:HGNC:471]	-	744	678	55	110	3.7197	3.77208	0.493339	0.745282
ENSG00000112333	56.5328	52.9552	0	0	7.94835	2.04596e-06	1.92818e-05	NR2E1	6	108166058	108188809	+	3733	protein_coding	nuclear receptor subfamily 2 group E member 1 [Source:HGNC Symbol;Acc:HGNC:7973]	Hormone_recep	74	62	0	0	0.558573	0.520782	0	0
novel.635	94.7306	27.3317	0	0	8.10652	2.05496e-06	1.93589e-05	-	CHR_HSCHR6_MHC_MCF_CTG1	31220973	31221670	-	452	-	PF07111:Alpha helical coiled-coil rod protein (HCR)	-	124	32	0	0	7.73018	2.2199	0	0
ENSG00000047634	3310.22	3361.8	393.817	754.435	2.53769	2.07165e-06	1.94928e-05	SCML1	X	17737449	17754988	+	5497	protein_coding	Scm polycomb group protein like 1 [Source:HGNC Symbol;Acc:HGNC:10580]	SAM_1	4333	3936	283	723	22.2111	22.4518	2.60264	5.0224
ENSG00000206557	508.795	532.115	90.4526	90.7826	2.52185	2.08599e-06	1.96044e-05	TRIM71	3	32818018	32897826	+	8685	protein_coding	tripartite motif containing 71 [Source:HGNC Symbol;Acc:HGNC:32669]	zf-B_box	666	623	65	87	2.16078	2.24927	0.378353	0.382515
ENSG00000197582	48.1293	61.4964	0	0	7.94964	2.09108e-06	1.96412e-05	GPX1P1	X	13378735	13379340	-	606	processed_pseudogene	glutathione peroxidase pseudogene 1 [Source:HGNC Symbol;Acc:HGNC:4560]	GSHPx	63	72	0	0	2.92937	3.72548	0	0
ENSG00000165288	1547.01	1604.88	137.766	338.087	2.72487	2.09158e-06	1.96412e-05	BRWD3	X	80670854	80809688	-	12694	protein_coding	bromodomain and WD repeat domain containing 3 [Source:HGNC Symbol;Acc:HGNC:17342]	Bromodomain	2025	1879	99	324	4.49503	4.64142	0.394267	0.974642
ENSG00000142408	361.351	316.023	55.6632	51.1304	2.66645	2.10387e-06	1.97488e-05	CACNG8	19	53963040	53990215	+	8747	protein_coding	calcium voltage-gated channel auxiliary subunit gamma 8 [Source:HGNC Symbol;Acc:HGNC:13628]	-	473	370	40	49	1.52373	1.32637	0.231182	0.213912
ENSG00000260400	161.959	163.99	2.78316	20.8696	3.73982	2.10863e-06	1.97778e-05	AL513534.1	10	68698500	68700794	+	2295	sense_overlapping	-	-	212	192	2	20	2.60291	2.62326	0.0440556	0.332771
ENSG00000111860	808.266	792.62	73.7537	166.956	2.7286	2.13606e-06	2.00191e-05	CEP85L	6	118460772	118710075	-	9462	protein_coding	centrosomal protein 85 like [Source:HGNC Symbol;Acc:HGNC:21638]	-	1058	928	53	160	3.15072	3.0753	0.28317	0.645708
ENSG00000162877	83.2713	69.1834	1.39158	1.04348	5.99217	2.15006e-06	2.01423e-05	PM20D1	1	205828022	205850132	-	2614	protein_coding	peptidase M20 domain containing 1 [Source:HGNC Symbol;Acc:HGNC:26518]	Peptidase_M20	109	81	1	1	1.17497	0.971632	0.0193396	0.0146081
ENSG00000159958	198.629	177.656	29.2232	13.5652	3.15488	2.16236e-06	2.02415e-05	TNFRSF13C	22	41922023	41926818	-	3944	protein_coding	TNF receptor superfamily member 13C [Source:HGNC Symbol;Acc:HGNC:17755]	-	260	208	21	13	1.85756	1.65367	0.269176	0.125865
ENSG00000100422	2879.35	2797.23	622.036	493.565	2.34764	2.2219e-06	2.07577e-05	CERK	22	46684411	46738261	-	4938	protein_coding	ceramide kinase [Source:HGNC Symbol;Acc:HGNC:19256]	-	3769	3275	447	473	21.5071	20.7961	4.57625	3.65771
ENSG00000167333	447.679	427.912	72.3621	76.1739	2.55888	2.28819e-06	2.12843e-05	TRIM68	11	4598672	4608259	-	4282	protein_coding	tripartite motif containing 68 [Source:HGNC Symbol;Acc:HGNC:21161]	SPRY	586	501	52	73	3.85618	3.66871	0.613918	0.650991
ENSG00000145777	47.3653	60.6423	0	0	7.92819	2.2926e-06	2.1317e-05	TSLP	5	111070062	111078024	+	4282	protein_coding	thymic stromal lymphopoietin [Source:HGNC Symbol;Acc:HGNC:30743]	-	62	71	0	0	0.407992	0.519917	0	0
ENSG00000259663	52.713	54.6635	0	0	7.92008	2.30476e-06	2.14216e-05	AC010478.1	5	51372736	51383332	-	7152	antisense	-	-	69	64	0	0	0.271849	0.280592	0	0
ENSG00000149311	2473.69	2531.6	176.731	528	2.82626	2.31206e-06	2.1481e-05	ATM	11	108222484	108369102	+	23972	protein_coding	ATM serine/threonine kinase [Source:HGNC Symbol;Acc:HGNC:795]	PI3_PI4_kinase	3238	2964	127	506	3.80609	3.87701	0.267826	0.806019
ENSG00000145832	77.9236	93.0987	6.95789	1.04348	4.50272	2.31836e-06	2.1531e-05	SLC25A48	5	135579202	135889770	+	8051	protein_coding	solute carrier family 25 member 48 [Source:HGNC Symbol;Acc:HGNC:30451]	Mito_carr	102	109	5	1	0.356991	0.424521	0.031396	0.00474295
ENSG00000147536	1960.31	1886.74	263.008	433.043	2.46516	2.36012e-06	2.19102e-05	GINS4	8	41529206	41545046	+	5475	protein_coding	GINS complex subunit 4 [Source:HGNC Symbol;Acc:HGNC:28226]	-	2566	2209	189	415	13.2062	12.6513	1.74514	2.89443
ENSG00000154188	89.3829	110.181	1.39158	0	7.36561	2.37178e-06	2.20012e-05	ANGPT1	8	107249482	107498055	-	7128	protein_coding	angiopoietin 1 [Source:HGNC Symbol;Acc:HGNC:484]	Fibrinogen_C	117	129	1	0	0.462514	0.567472	0.00709228	0
ENSG00000112218	403.369	441.578	44.5305	82.4348	2.72745	2.39221e-06	2.2182e-05	GPR63	6	96794126	96837463	-	5952	protein_coding	G protein-coupled receptor 63 [Source:HGNC Symbol;Acc:HGNC:13302]	7tm_1	528	517	32	79	2.49964	2.72364	0.271795	0.506831
ENSG00000133874	558.452	586.778	118.284	59.4782	2.69337	2.40456e-06	2.22615e-05	RNF122	8	33547755	33567125	-	1868	protein_coding	ring finger protein 122 [Source:HGNC Symbol;Acc:HGNC:21147]	-	731	687	85	57	11.0267	11.5319	2.30036	1.16519
ENSG00000134207	61.1165	46.1223	0	0	7.91876	2.41369e-06	2.23373e-05	SYT6	1	114089291	114153919	-	5104	protein_coding	synaptotagmin 6 [Source:HGNC Symbol;Acc:HGNC:18638]	C2	80	54	0	0	0.441658	0.331746	0	0
ENSG00000163818	620.333	661.94	23.6568	113.739	3.21202	2.44117e-06	2.2565e-05	LZTFL1	3	45823316	45916042	-	7201	protein_coding	leucine zipper transcription factor like 1 [Source:HGNC Symbol;Acc:HGNC:6741]	-	812	775	17	109	3.17738	3.37467	0.119347	0.578006
ENSG00000082293	54.2409	52.1011	0	0	7.90625	2.44596e-06	2.26005e-05	COL19A1	6	69866571	70209976	+	8511	protein_coding	collagen type XIX alpha 1 chain [Source:HGNC Symbol;Acc:HGNC:2196]	Collagen	71	61	0	0	0.235063	0.224736	0	0
ENSG00000136352	66.4642	76.8705	2.78316	2.08696	4.89856	2.46202e-06	2.27311e-05	NKX2-1	14	36516392	36521149	-	3165	protein_coding	NK2 homeobox 1 [Source:HGNC Symbol;Acc:HGNC:11825]	Homeobox	87	90	2	2	0.774554	0.891644	0.0319455	0.0241299
ENSG00000004455	11115.6	11003.6	1867.5	2535.65	2.32854	2.46666e-06	2.2765e-05	AK2	1	33007940	33080996	-	5727	protein_coding	adenylate kinase 2 [Source:HGNC Symbol;Acc:HGNC:362]	-	14550	12883	1342	2430	71.5883	70.5363	11.8462	16.2023
ENSG00000143033	3179.59	3266.14	329.804	728.348	2.60559	2.51052e-06	2.31608e-05	MTF2	1	93079235	93139081	+	5909	protein_coding	metal response element binding transcription factor 2 [Source:HGNC Symbol;Acc:HGNC:29535]	PHD	4162	3824	237	698	19.847	20.2921	2.02763	4.51066
ENSG00000175906	388.854	346.771	70.9705	34.4348	2.81222	2.57311e-06	2.36919e-05	ARL4D	17	43398959	43401137	+	1612	protein_coding	ADP ribosylation factor like GTPase 4D [Source:HGNC Symbol;Acc:HGNC:656]	Arf	509	406	51	33	8.89732	7.89739	1.59941	0.781714
ENSG00000108852	1694.46	1722.75	368.768	136.696	2.75986	2.58285e-06	2.37723e-05	MPP2	17	43875357	43909711	-	6114	protein_coding	membrane palmitoylated protein 2 [Source:HGNC Symbol;Acc:HGNC:7220]	SH3_2	2218	2017	265	131	10.2222	10.3443	2.19116	0.818172
ENSG00000104267	2769.34	2654.59	606.728	460.174	2.34645	2.61535e-06	2.40339e-05	CA2	8	85463852	85481493	+	2123	protein_coding	carbonic anhydrase 2 [Source:HGNC Symbol;Acc:HGNC:1373]	-	3625	3108	436	441	48.1132	45.9043	10.3822	7.93209
ENSG00000154655	67.2282	40.1435	0	0	7.9209	2.61967e-06	2.40643e-05	L3MBTL4	18	5954706	6415237	-	7959	protein_coding	L3MBTL4, histone methyl-lysine binding protein [Source:HGNC Symbol;Acc:HGNC:26677]	MBT	88	47	0	0	0.311552	0.185166	0	0
ENSG00000229544	89.3829	76.8705	1.39158	6.26087	4.3727	2.62385e-06	2.40933e-05	NKX1-2	10	124445239	124450184	-	3364	protein_coding	NK1 homeobox 2 [Source:HGNC Symbol;Acc:HGNC:31652]	Homeobox	117	90	1	6	0.980023	0.838898	0.0150279	0.0681074
ENSG00000010379	48.8932	56.3717	0	0	7.89125	2.63031e-06	2.41338e-05	SLC6A13	12	220621	262873	-	4243	protein_coding	solute carrier family 6 member 13 [Source:HGNC Symbol;Acc:HGNC:11046]	SNF	64	66	0	0	0.425024	0.487746	0	0
ENSG00000105664	70.284	37.5811	0	0	7.92766	2.69792e-06	2.47253e-05	COMP	19	18782773	18791314	-	3101	protein_coding	cartilage oligomeric matrix protein [Source:HGNC Symbol;Acc:HGNC:2227]	TSP_C	92	44	0	0	0.835973	0.444911	0	0
novel.62	71.048	77.7246	1.39158	4.17391	4.67851	2.71264e-06	2.48506e-05	-	15	99879495	99884543	+	2184	-	PF08333:Protein of unknown function (DUF1725)	-	93	91	1	4	1.19988	1.30651	0.0231473	0.0699369
ENSG00000105642	135.984	99.0775	13.9158	5.21739	3.65424	2.71827e-06	2.48829e-05	KCNN1	19	17951293	18000080	+	3981	protein_coding	potassium calcium-activated channel subfamily N member 1 [Source:HGNC Symbol;Acc:HGNC:6290]	Ion_trans_2	178	116	10	5	1.25989	0.913668	0.126988	0.0479597
ENSG00000121743	191.753	181.927	22.2653	26.0869	2.94636	2.73852e-06	2.50585e-05	GJA3	13	20138255	20161049	-	5211	protein_coding	gap junction protein alpha 3 [Source:HGNC Symbol;Acc:HGNC:4277]	Connexin	251	213	16	25	1.35725	1.28168	0.155222	0.183197
ENSG00000268388	55.7688	48.6846	0	0	7.88056	2.75259e-06	2.51775e-05	FENDRR	16	86474529	86509099	-	6795	lincRNA	FOXF1 adjacent non-coding developmental regulatory RNA [Source:HGNC Symbol;Acc:HGNC:43894]	-	73	57	0	0	0.302719	0.263032	0	0
ENSG00000115423	85.5631	66.6211	0	2.08696	6.0339	2.76706e-06	2.53001e-05	DNAH6	2	84516455	84819589	+	13514	protein_coding	dynein axonemal heavy chain 6 [Source:HGNC Symbol;Acc:HGNC:2951]	Dynein_heavy	112	78	0	2	0.233529	0.180981	0	0.00565125
ENSG00000076641	373.575	418.517	65.4042	67.8261	2.57123	2.78785e-06	2.54803e-05	PAG1	8	80967810	81112068	-	11023	protein_coding	phosphoprotein membrane anchor with glycosphingolipid microdomains 1 [Source:HGNC Symbol;Acc:HGNC:30043]	-	489	490	47	65	1.25002	1.39386	0.215552	0.225171
ENSG00000120658	277.316	282.713	36.181	48	2.72919	2.81524e-06	2.56908e-05	ENOX1	13	43213518	43786908	-	3101	protein_coding	ecto-NOX disulfide-thiol exchanger 1 [Source:HGNC Symbol;Acc:HGNC:25474]	RRM_1	363	331	26	46	3.29846	3.34695	0.423863	0.566441
ENSG00000249896	63.4084	84.5575	1.39158	1.04348	5.9482	2.82335e-06	2.57548e-05	LINC02495	4	6200733	6239937	+	5643	transcribed_unprocessed_pseudogene	long intergenic non-protein coding RNA 2495 [Source:HGNC Symbol;Acc:HGNC:27728]	HMG_box	83	99	1	1	0.414452	0.550108	0.00895867	0.00676688
ENSG00000230426	81.7433	112.743	1.39158	0	7.32797	2.83757e-06	2.58746e-05	ERVMER61-1	1	187070700	187686622	+	10142	lincRNA	endogenous retrovirus group MER61 member 1 [Source:HGNC Symbol;Acc:HGNC:27919]	-	107	132	1	0	0.297281	0.408106	0.0049846	0
ENSG00000132821	93.2027	67.4752	2.78316	5.21739	4.29486	2.84487e-06	2.59244e-05	VSTM2L	20	37903104	37945350	+	1959	protein_coding	V-set and transmembrane domain containing 2 like [Source:HGNC Symbol;Acc:HGNC:16096]	V-set	122	79	2	5	1.75482	1.26449	0.0516118	0.0974618
ENSG00000162551	72.5759	66.6211	1.39158	2.08696	5.29338	2.86498e-06	2.60742e-05	ALPL	1	21509372	21578412	+	3007	protein_coding	alkaline phosphatase, liver/bone/kidney [Source:HGNC Symbol;Acc:HGNC:438]	-	95	78	1	2	0.890218	0.813362	0.016812	0.0253978
ENSG00000165323	98.5504	93.0987	0	1.04348	7.32928	2.88397e-06	2.62118e-05	FAT3	11	92352096	92896470	+	19280	protein_coding	FAT atypical cadherin 3 [Source:HGNC Symbol;Acc:HGNC:23112]	Laminin_G_2	129	109	0	1	0.188534	0.177273	0	0.00198058
ENSG00000172020	47.3653	56.3717	0	0	7.8701	2.89181e-06	2.62677e-05	GAP43	3	115623324	115721490	+	2087	protein_coding	growth associated protein 43 [Source:HGNC Symbol;Acc:HGNC:4140]	IQ	62	66	0	0	0.837097	0.991617	0	0
ENSG00000148942	51.1851	52.1011	0	0	7.86408	2.92486e-06	2.65373e-05	SLC5A12	11	26667019	26723427	-	7544	protein_coding	solute carrier family 5 member 12 [Source:HGNC Symbol;Acc:HGNC:28750]	-	67	61	0	0	0.250253	0.253542	0	0
ENSG00000157350	1185.66	1191.49	232.394	234.783	2.34715	2.93445e-06	2.66141e-05	ST3GAL2	16	70375978	70439237	-	9744	protein_coding	ST3 beta-galactoside alpha-2,3-sialyltransferase 2 [Source:HGNC Symbol;Acc:HGNC:10863]	Glyco_transf_29	1552	1395	167	225	4.48808	4.4891	0.866429	0.881747
ENSG00000235370	69.52	70.8917	2.78316	2.08696	4.86901	2.93851e-06	2.66407e-05	DNM1P51	15	84398316	84411701	-	8796	transcribed_unprocessed_pseudogene	dynamin 1 pseudogene 51 [Source:HGNC Symbol;Acc:HGNC:48500]	-	91	83	2	2	0.291516	0.29588	0.0114947	0.00868248
ENSG00000113296	161.195	164.844	22.2653	3.13043	3.72659	2.96142e-06	2.68175e-05	THBS4	5	79991311	80083287	+	4605	protein_coding	thrombospondin 4 [Source:HGNC Symbol;Acc:HGNC:11788]	-	211	193	16	3	1.2911	1.31417	0.175648	0.0248766
ENSG00000142920	175.71	148.616	23.6568	13.5652	3.13839	3.0112e-06	2.72265e-05	AZIN2	1	33081104	33120530	+	6559	protein_coding	antizyme inhibitor 2 [Source:HGNC Symbol;Acc:HGNC:29957]	-	230	174	17	13	0.98809	0.831829	0.131028	0.0756841
ENSG00000189007	1046.62	1048	123.851	232.696	2.5516	3.02045e-06	2.72997e-05	ADAT2	6	143422832	143450673	-	7175	protein_coding	adenosine deaminase, tRNA specific 2 [Source:HGNC Symbol;Acc:HGNC:21172]	-	1370	1227	89	223	5.38028	5.36223	0.627078	1.18681
ENSG00000159712	68.7561	89.6822	0	5.21739	4.80618	3.04816e-06	2.7529e-05	ANKRD18CP	9	97156570	97221235	-	2980	unprocessed_pseudogene	ankyrin repeat domain 18C, pseudogene [Source:HGNC Symbol;Acc:HGNC:43601]	-	90	105	0	5	0.851006	1.10483	0	0.0640697
novel.187	55.7688	46.9764	0	0	7.85683	3.06125e-06	2.76367e-05	-	8	37148218	37167527	+	891	-	-	-	73	55	0	0	2.30862	1.93556	0	0
ENSG00000164045	3804.5	3828.15	798.766	784.695	2.26913	3.14753e-06	2.83939e-05	CDC25A	3	48157146	48188402	-	4117	protein_coding	cell division cycle 25A [Source:HGNC Symbol;Acc:HGNC:1725]	Rhodanese	4980	4482	574	752	34.0843	34.1361	7.04831	6.97486
ENSG00000136243	1476.73	1599.76	226.827	348.522	2.41736	3.20093e-06	2.88426e-05	NUPL2	7	23181827	23201011	+	4366	protein_coding	nucleoporin like 2 [Source:HGNC Symbol;Acc:HGNC:17010]	-	1933	1873	163	334	12.4754	13.4517	1.88737	2.9212
ENSG00000005810	5075.73	4815.51	862.779	1137.39	2.30574	3.23321e-06	2.91223e-05	MYCBP2	13	77044655	77327050	-	15945	protein_coding	MYC binding protein 2, E3 ubiquitin protein ligase [Source:HGNC Symbol;Acc:HGNC:23386]	SH3_3	6644	5638	620	1090	11.7412	11.0872	1.96572	2.61036
ENSG00000104967	93.2027	96.5152	9.74105	3.13043	3.92977	3.24418e-06	2.91877e-05	NOVA2	19	45933734	45973546	-	8684	protein_coding	NOVA alternative splicing regulator 2 [Source:HGNC Symbol;Acc:HGNC:7887]	KH_1	122	113	7	3	0.395864	0.40802	0.0407504	0.0131917
ENSG00000267454	42.0176	60.6423	0	0	7.85473	3.24828e-06	2.92135e-05	ZNF582-AS1	19	56393656	56399172	+	2037	lincRNA	ZNF582 antisense RNA 1 (head to head) [Source:HGNC Symbol;Acc:HGNC:25213]	-	55	71	0	0	0.760813	1.09292	0	0
ENSG00000024526	4718.2	4954.73	160.032	889.043	3.20338	3.28971e-06	2.95749e-05	DEPDC1	1	68474152	68497221	-	5904	protein_coding	DEP domain containing 1 [Source:HGNC Symbol;Acc:HGNC:22949]	RhoGAP	6176	5801	115	852	29.4759	30.8091	0.984703	5.51051
ENSG00000281207	113.83	144.346	9.74105	15.6522	3.32997	3.31074e-06	2.97186e-05	SLFNL1-AS1	1	41014590	41043890	+	4800	antisense	SLFNL1 antisense RNA 1 [Source:HGNC Symbol;Acc:HGNC:44126]	AAA_4	149	169	7	15	0.874685	1.104	0.0737243	0.11933
novel.725	48.8932	52.1011	0	0	7.83163	3.36262e-06	3.01385e-05	-	KI270733.1	143956	148612	+	332	-	-	-	64	61	0	0	5.43186	5.76122	0	0
ENSG00000217236	80.9794	64.9129	4.17474	2.08696	4.58458	3.36733e-06	3.01692e-05	SP9	2	174334946	174338492	+	2554	protein_coding	Sp9 transcription factor [Source:HGNC Symbol;Acc:HGNC:30690]	zf-C2H2	106	76	3	2	1.16948	0.933072	0.0593819	0.0299025
ENSG00000251363	49.6572	51.247	0	0	7.8304	3.37562e-06	3.02205e-05	LINC02315	14	40954898	40975877	+	696	lincRNA	long intergenic non-protein coding RNA 2315 [Source:HGNC Symbol;Acc:HGNC:53234]	-	65	60	0	0	2.63154	2.70312	0	0
ENSG00000177483	75.6317	73.454	4.17474	3.13043	4.36808	3.39385e-06	3.03607e-05	RBM44	2	237798389	237842808	+	6049	protein_coding	RNA binding motif protein 44 [Source:HGNC Symbol;Acc:HGNC:24756]	-	99	86	3	3	0.461167	0.445797	0.0250721	0.0189381
ENSG00000163661	77.1596	70.0376	0	4.17391	5.01263	3.41598e-06	3.05248e-05	PTX3	3	157436789	157443628	+	1940	protein_coding	pentraxin 3 [Source:HGNC Symbol;Acc:HGNC:9692]	-	101	82	0	4	1.46699	1.32536	0	0.0787331
ENSG00000183814	1750.99	1755.21	121.067	375.652	2.81651	3.41607e-06	3.05248e-05	LIN9	1	226231149	226309869	-	4442	protein_coding	lin-9 DREAM MuvB core complex component [Source:HGNC Symbol;Acc:HGNC:30830]	DIRP	2292	2055	87	360	14.5393	14.5063	0.990135	3.09473
ENSG00000185477	528.658	475.743	37.5726	101.217	2.84667	3.42437e-06	3.05759e-05	GPRIN3	4	89236386	89308010	-	15205	protein_coding	GPRIN family member 3 [Source:HGNC Symbol;Acc:HGNC:27733]	-	692	557	27	97	1.28241	1.14866	0.08977	0.243604
ENSG00000239407	203.976	189.614	19.4821	31.3043	2.94366	3.43632e-06	3.06709e-05	Z68871.1	X	102884414	102906158	+	1133	lincRNA	-	-	267	222	14	30	6.6403	6.14392	0.624672	1.01109
ENSG00000187824	54.2409	46.1223	0	0	7.82298	3.52804e-06	3.1442e-05	TMEM220	17	10699015	10730316	-	3508	protein_coding	transmembrane protein 220 [Source:HGNC Symbol;Acc:HGNC:33757]	-	71	54	0	0	0.570302	0.482677	0	0
ENSG00000143751	3429.4	3379.74	551.065	796.174	2.33691	3.57599e-06	3.18573e-05	SDE2	1	225982702	225999331	-	3975	protein_coding	SDE2 telomere maintenance homolog [Source:HGNC Symbol;Acc:HGNC:26643]	-	4489	3957	396	763	31.8214	31.2141	5.0363	7.3297
ENSG00000154429	1686.82	1690.3	126.634	368.348	2.7675	3.623e-06	3.22396e-05	CCSAP	1	229321005	229343294	-	6263	protein_coding	centriole, cilia and spindle associated protein [Source:HGNC Symbol;Acc:HGNC:29578]	-	2208	1979	91	353	9.93398	9.908	0.734535	2.15224
ENSG00000115896	77.9236	74.3081	1.39158	5.21739	4.45935	3.63117e-06	3.23002e-05	PLCL1	2	197804702	198572581	+	8013	protein_coding	phospholipase C like 1 (inactive) [Source:HGNC Symbol;Acc:HGNC:9063]	PI-PLC-X	102	87	1	5	0.358684	0.340445	0.00630897	0.0238272
ENSG00000196338	128.345	138.367	8.34947	17.7391	3.33052	3.65175e-06	3.2471e-05	NLGN3	X	71144831	71171201	+	4006	protein_coding	neuroligin 3 [Source:HGNC Symbol;Acc:HGNC:14289]	COesterase	168	162	6	17	1.18169	1.26802	0.0757171	0.162045
ENSG00000064989	88.619	94.8069	0	1.04348	7.266	3.69331e-06	3.28035e-05	CALCRL	2	187343129	187448460	-	6144	protein_coding	calcitonin receptor like receptor [Source:HGNC Symbol;Acc:HGNC:16709]	7tm_2	116	111	0	1	0.532002	0.566493	0	0.00621509
ENSG00000116754	12133.2	12092.6	1548.83	2911.3	2.44112	3.70957e-06	3.29231e-05	SRSF11	1	70205682	70253052	+	8473	protein_coding	serine and arginine rich splicing factor 11 [Source:HGNC Symbol;Acc:HGNC:10782]	RRM_1	15882	14158	1113	2790	52.8171	52.3947	6.64067	12.5738
ENSG00000083520	6172	6408.44	471.745	1403.48	2.74526	3.78988e-06	3.35854e-05	DIS3	13	72752169	72782096	-	10835	protein_coding	DIS3 homolog, exosome endoribonuclease and 3'-5' exoribonuclease [Source:HGNC Symbol;Acc:HGNC:20604]	RNB	8079	7503	339	1345	21.0104	21.7134	1.5817	4.74015
ENSG00000180537	181.058	174.24	11.1326	28.1739	3.15479	3.91645e-06	3.46291e-05	RNF182	6	13924446	13980302	+	4090	protein_coding	ring finger protein 182 [Source:HGNC Symbol;Acc:HGNC:28522]	-	237	204	8	27	1.63279	1.56397	0.0988827	0.252081
ENSG00000125285	62.6444	82.8493	0	2.08696	5.96904	3.95057e-06	3.48915e-05	SOX21	13	94709622	94712399	-	2778	protein_coding	SRY-box 21 [Source:HGNC Symbol;Acc:HGNC:11197]	HMG_box	82	97	0	2	0.831741	1.09487	0	0.0274914
ENSG00000105996	91.6748	89.6822	1.39158	0	7.22746	3.96797e-06	3.50321e-05	HOXA2	7	27100354	27102811	-	2458	protein_coding	homeobox A2 [Source:HGNC Symbol;Acc:HGNC:5103]	Homeobox	120	105	1	0	1.37564	1.33946	0.020567	0
ENSG00000162402	6767.89	6678.34	1011.68	1617.39	2.35423	3.97631e-06	3.50926e-05	USP24	1	55066359	55215113	-	11772	protein_coding	ubiquitin specific peptidase 24 [Source:HGNC Symbol;Acc:HGNC:12623]	UCH	8859	7819	727	1550	21.2051	20.8268	3.12204	5.02783
ENSG00000151623	148.208	134.096	6.95789	19.8261	3.36861	3.98515e-06	3.51575e-05	NR3C2	4	148078762	148444698	-	6607	protein_coding	nuclear receptor subfamily 3 group C member 2 [Source:HGNC Symbol;Acc:HGNC:7979]	Hormone_recep	194	157	5	19	0.827378	0.745106	0.0382577	0.109812
ENSG00000273297	87.091	80.287	6.95789	0	4.70707	4.0036e-06	3.52998e-05	AC009275.1	7	134416290	134432453	-	1205	lincRNA	-	-	114	94	5	0	2.66578	2.44604	0.209767	0
ENSG00000242207	51.1851	46.9764	0	0	7.79084	4.00428e-06	3.52998e-05	HOXB-AS4	17	48628675	48634932	+	669	antisense	HOXB cluster antisense RNA 4 [Source:HGNC Symbol;Acc:HGNC:40285]	-	67	55	0	0	2.82199	2.57786	0	0
ENSG00000163132	743.33	734.54	151.682	131.478	2.38479	4.06366e-06	3.57034e-05	MSX1	4	4859666	4863936	+	2120	protein_coding	msh homeobox 1 [Source:HGNC Symbol;Acc:HGNC:7391]	Homeobox	973	860	109	126	12.9325	12.7199	2.59923	2.26952
ENSG00000236499	72.5759	61.4964	1.39158	2.08696	5.23959	4.07732e-06	3.5807e-05	LINC00896	22	20206397	20208524	+	2128	lincRNA	long intergenic non-protein coding RNA 896 [Source:HGNC Symbol;Acc:HGNC:26519]	-	95	72	1	2	1.25794	1.06092	0.0237565	0.0358887
ENSG00000261514	52.713	45.2682	0	0	7.78831	4.07849e-06	3.5807e-05	LINC01976	17	43938363	43938959	+	434	lincRNA	long intergenic non-protein coding RNA 1976 [Source:HGNC Symbol;Acc:HGNC:52803]	-	69	53	0	0	4.47987	3.82921	0	0
ENSG00000240038	84.0352	88.8281	4.17474	7.30435	3.88625	4.14585e-06	3.63713e-05	AMY2B	1	103553815	103579534	+	7491	protein_coding	amylase, alpha 2B (pancreatic) [Source:HGNC Symbol;Acc:HGNC:478]	-	110	104	3	7	0.41377	0.435328	0.0202458	0.0356826
ENSG00000183032	161.195	184.489	9.74105	27.1304	3.20499	4.27432e-06	3.74011e-05	SLC25A21	14	36678431	37172866	-	3703	protein_coding	solute carrier family 25 member 21 [Source:HGNC Symbol;Acc:HGNC:14411]	Mito_carr	211	216	7	26	1.60559	1.82904	0.0955648	0.268113
ENSG00000177459	70.284	68.3293	0	3.13043	5.32955	4.28311e-06	3.74641e-05	ERICH5	8	98064311	98093610	+	1761	protein_coding	glutamate rich 5 [Source:HGNC Symbol;Acc:HGNC:26823]	-	92	80	0	3	1.47209	1.42447	0	0.065052
ENSG00000259834	48.8932	47.8305	0	0	7.76945	4.36769e-06	3.81898e-05	AL365361.1	1	110653560	110657040	-	3481	lincRNA	-	-	64	56	0	0	0.518063	0.504437	0	0
ENSG00000156531	6265.97	6503.24	197.604	1181.22	3.21006	4.38753e-06	3.83491e-05	PHF6	X	134373253	134428791	+	8016	protein_coding	PHD finger protein 6 [Source:HGNC Symbol;Acc:HGNC:18145]	-	8202	7614	142	1132	28.8316	29.7836	0.895539	5.39247
ENSG00000025156	2057.33	2084.9	179.514	471.652	2.6672	4.41336e-06	3.85321e-05	HSF2	6	122399546	122433119	+	2702	protein_coding	heat shock transcription factor 2 [Source:HGNC Symbol;Acc:HGNC:5225]	Vert_HS_TF	2693	2441	129	452	28.0839	28.3273	2.41356	6.38781
ENSG00000159247	525.602	539.802	107.152	88.6956	2.44529	4.4246e-06	3.86016e-05	TUBBP5	9	138150075	138177433	+	2814	transcribed_unprocessed_pseudogene	tubulin beta pseudogene 5 [Source:HGNC Symbol;Acc:HGNC:23674]	-	688	632	77	85	6.88923	7.04232	1.38331	1.15344
ENSG00000162878	376.631	353.604	70.9705	21.913	2.9883	4.46017e-06	3.88832e-05	PKDCC	2	42048020	42058528	+	3925	protein_coding	protein kinase domain containing, cytoplasmic [Source:HGNC Symbol;Acc:HGNC:25123]	-	493	414	51	21	3.53927	3.30737	0.656877	0.204305
ENSG00000180616	102.37	93.9528	8.34947	8.34782	3.55568	4.52579e-06	3.94259e-05	SSTR2	17	73165012	73176633	+	7852	protein_coding	somatostatin receptor 2 [Source:HGNC Symbol;Acc:HGNC:11331]	7tm_1	134	110	6	8	0.480874	0.439273	0.03863	0.0389053
ENSG00000134986	1206.29	1252.13	89.061	268.174	2.77887	4.55155e-06	3.96213e-05	NREP	5	111662621	111997464	-	9337	protein_coding	neuronal regeneration related protein [Source:HGNC Symbol;Acc:HGNC:16834]	-	1579	1466	64	257	4.7652	4.92322	0.346518	1.05105
ENSG00000225439	207.032	235.736	38.9642	12.5217	3.12501	4.65771e-06	4.04857e-05	BOLA3-AS1	2	74148009	74150061	+	1834	antisense	BOLA3 antisense RNA 1 (head to head) [Source:HGNC Symbol;Acc:HGNC:42922]	-	271	276	28	12	4.16367	4.71881	0.771814	0.249851
ENSG00000137338	456.082	514.178	69.5789	100.174	2.51136	4.72944e-06	4.10789e-05	PGBD1	6	28281572	28302549	+	3100	protein_coding	piggyBac transposable element derived 1 [Source:HGNC Symbol;Acc:HGNC:19398]	SCAN	597	602	50	96	5.42649	6.08916	0.815384	1.18252
ENSG00000184500	449.97	426.204	16.6989	80.3478	3.16059	4.75175e-06	4.12121e-05	PROS1	3	93873033	93974066	-	4429	protein_coding	protein S [Source:HGNC Symbol;Acc:HGNC:9456]	EGF_CA	589	499	12	77	3.74728	3.53279	0.136971	0.663871
ENSG00000163909	310.93	263.068	43.1389	49.0435	2.63658	4.75635e-06	4.12368e-05	HEYL	1	39624153	39639945	-	3661	protein_coding	hes related family bHLH transcription factor with YRPW motif-like [Source:HGNC Symbol;Acc:HGNC:4882]	HLH	407	308	31	47	3.13257	2.63799	0.428071	0.490227
novel.169	45.0734	50.3929	0	0	7.75033	4.75826e-06	4.12382e-05	-	6	26750008	26754931	-	1020	-	-	-	59	59	0	0	1.62989	1.81374	0	0
ENSG00000259129	85.5631	65.767	0	5.21739	4.74171	4.82173e-06	4.17577e-05	LINC00648	14	47764954	47795092	-	3043	lincRNA	long intergenic non-protein coding RNA 648 [Source:HGNC Symbol;Acc:HGNC:44302]	-	112	77	0	5	1.0371	0.793435	0	0.0627432
ENSG00000223564	48.1293	46.9764	0	0	7.74511	4.8394e-06	4.18953e-05	CYP4F32P	2	94759259	94760279	-	504	unprocessed_pseudogene	cytochrome P450 family 4 subfamily F member 32, pseudogene [Source:HGNC Symbol;Acc:HGNC:39951]	-	63	55	0	0	3.52222	3.4218	0	0
ENSG00000171243	90.1469	84.5575	0	1.04348	7.19608	4.84224e-06	4.19046e-05	SOSTDC1	7	16461481	16530580	-	2473	protein_coding	sclerostin domain containing 1 [Source:HGNC Symbol;Acc:HGNC:21748]	-	118	99	0	1	1.34451	1.25526	0	0.015441
ENSG00000139112	927.443	905.364	153.074	202.435	2.36462	4.85104e-06	4.19653e-05	GABARAPL1	12	10212458	10223130	+	4086	protein_coding	GABA type A receptor associated protein like 1 [Source:HGNC Symbol;Acc:HGNC:4068]	-	1214	1060	110	194	8.37195	8.13449	1.36097	1.81302
ENSG00000119698	69.52	107.619	1.39158	0	7.1922	5.00618e-06	4.3165e-05	PPP4R4	14	94146128	94279735	+	4974	protein_coding	protein phosphatase 4 regulatory subunit 4 [Source:HGNC Symbol;Acc:HGNC:23788]	-	91	126	1	0	0.515516	0.794305	0.0101636	0
ENSG00000153162	192.517	187.052	32.0063	9.3913	3.22217	5.0999e-06	4.3925e-05	BMP6	6	7726797	7881422	+	2780	protein_coding	bone morphogenetic protein 6 [Source:HGNC Symbol;Acc:HGNC:1073]	TGFb_propeptide	252	219	23	9	2.55424	2.47014	0.418251	0.123622
ENSG00000270127	103.134	110.181	5.56632	12.5217	3.53028	5.16093e-06	4.44182e-05	AC027020.2	15	100547765	100550153	-	2389	lincRNA	-	-	135	129	4	12	1.5923	1.69315	0.0846443	0.191807
ENSG00000170396	392.674	389.477	26.44	78.2608	2.88966	5.20072e-06	4.47281e-05	ZNF804A	2	184598366	184939492	+	4694	protein_coding	zinc finger protein 804A [Source:HGNC Symbol;Acc:HGNC:21711]	-	514	456	19	75	3.08551	3.0461	0.204628	0.610122
ENSG00000077254	4259.06	4249.23	328.413	974.608	2.70589	5.33619e-06	4.58597e-05	USP33	1	77695987	77759852	-	6918	protein_coding	ubiquitin specific peptidase 33 [Source:HGNC Symbol;Acc:HGNC:20059]	UCH	5575	4975	236	934	22.7076	22.5494	1.72459	5.15543
ENSG00000197576	130.637	146.908	18.0905	14.6087	3.09166	5.37509e-06	4.61604e-05	HOXA4	7	27128507	27130799	-	1747	protein_coding	homeobox A4 [Source:HGNC Symbol;Acc:HGNC:5105]	Homeobox	171	172	13	14	2.7581	3.08715	0.376187	0.306009
ENSG00000117054	2314.79	2463.27	217.086	557.217	2.62368	5.39563e-06	4.63032e-05	ACADM	1	75724347	75787575	+	4783	protein_coding	acyl-CoA dehydrogenase medium chain [Source:HGNC Symbol;Acc:HGNC:89]	-	3030	2884	156	534	17.8504	18.9068	1.64884	4.26324
ENSG00000131773	242.174	229.757	30.6147	40.6956	2.72116	5.4406e-06	4.66552e-05	KHDRBS3	8	135457457	135656722	+	8645	protein_coding	KH RNA binding domain containing, signal transduction associated 3 [Source:HGNC Symbol;Acc:HGNC:18117]	KH_1	317	269	22	39	1.03324	0.975686	0.12865	0.172266
ENSG00000214455	139.04	140.929	19.4821	13.5652	3.09334	5.57666e-06	4.77179e-05	RCN1P2	13	45390353	45391267	-	915	processed_pseudogene	reticulocalbin 1 pseudogene 2 [Source:HGNC Symbol;Acc:HGNC:39204]	-	182	165	14	13	5.60476	5.65439	0.773501	0.542527
ENSG00000154511	565.328	549.197	50.0968	121.043	2.69632	5.66045e-06	4.83648e-05	FAM69A	1	92832737	92961522	-	3091	protein_coding	family with sequence similarity 69 member A [Source:HGNC Symbol;Acc:HGNC:32213]	-	740	643	36	116	6.74589	6.52281	0.588786	1.43304
ENSG00000149050	48.1293	44.4141	0	0	7.70581	5.72407e-06	4.88553e-05	ZNF214	11	6999318	7020368	-	2949	protein_coding	zinc finger protein 214 [Source:HGNC Symbol;Acc:HGNC:13006]	KRAB	63	52	0	0	0.601966	0.552906	0	0
ENSG00000158815	69.52	64.0587	1.39158	1.04348	5.80102	5.74983e-06	4.90397e-05	FGF17	8	22042398	22048809	+	3287	protein_coding	fibroblast growth factor 17 [Source:HGNC Symbol;Acc:HGNC:3673]	-	91	75	1	1	0.780096	0.715458	0.0153799	0.0116171
ENSG00000062524	165.779	138.367	20.8737	2.08696	3.77646	5.78151e-06	4.92921e-05	LTK	15	41503638	41513887	-	3490	protein_coding	leukocyte receptor tyrosine kinase [Source:HGNC Symbol;Acc:HGNC:6721]	Pkinase_Tyr	217	162	15	2	1.75203	1.4555	0.21728	0.0218828
ENSG00000078900	554.632	538.948	116.893	40.6956	2.80298	5.78798e-06	4.93295e-05	TP73	1	3652520	3736201	+	6763	protein_coding	tumor protein p73 [Source:HGNC Symbol;Acc:HGNC:12003]	P53	726	631	84	39	3.02485	2.92558	0.627905	0.220203
ENSG00000244414	46.6013	45.2682	0	0	7.69518	5.96866e-06	5.07228e-05	CFHR1	1	196819757	196832189	+	2197	protein_coding	complement factor H related 1 [Source:HGNC Symbol;Acc:HGNC:4888]	Sushi	61	53	0	0	0.782359	0.756429	0	0
ENSG00000125430	365.171	382.644	76.5368	51.1304	2.55513	6.06915e-06	5.15513e-05	HS3ST3B1	17	14301083	14349404	+	5367	protein_coding	heparan sulfate-glucosamine 3-sulfotransferase 3B1 [Source:HGNC Symbol;Acc:HGNC:5198]	Sulfotransfer_1	478	448	55	49	2.50959	2.61739	0.518066	0.348629
ENSG00000125246	159.667	186.197	13.9158	28.1739	3.02201	6.0705e-06	5.15513e-05	CLYBL	13	99606669	99897134	+	7227	protein_coding	citrate lyase beta like [Source:HGNC Symbol;Acc:HGNC:18355]	-	209	218	10	27	0.814882	0.945847	0.0699513	0.142661
ENSG00000182612	228.423	273.317	47.3137	26.0869	2.78308	6.11224e-06	5.1887e-05	TSPAN10	17	81637171	81648749	+	4745	protein_coding	tetraspanin 10 [Source:HGNC Symbol;Acc:HGNC:29942]	Tetraspannin	299	320	34	25	1.77558	2.11464	0.36224	0.201188
ENSG00000123570	236.063	247.694	16.6989	44.8696	2.95757	6.16819e-06	5.23244e-05	RAB9B	X	103822322	103832228	-	3748	protein_coding	RAB9B, member RAS oncogene family [Source:HGNC Symbol;Acc:HGNC:14090]	Ras	309	290	12	43	2.32309	2.42617	0.161858	0.438094
ENSG00000180113	49.6572	41.8517	0	0	7.68975	6.18665e-06	5.2462e-05	TDRD6	6	46687875	46704319	+	9041	protein_coding	tudor domain containing 6 [Source:HGNC Symbol;Acc:HGNC:21339]	-	65	49	0	0	0.202583	0.169943	0	0
ENSG00000122970	893.065	883.156	61.2295	194.087	2.79304	6.27269e-06	5.31569e-05	IFT81	12	110124335	110218797	+	7005	protein_coding	intraflagellar transport 81 [Source:HGNC Symbol;Acc:HGNC:14313]	-	1169	1034	44	186	4.70233	4.62844	0.31754	1.01392
ENSG00000188162	85.5631	81.1411	0	1.04348	7.12861	6.27309e-06	5.31569e-05	OTOG	11	17547373	17647150	+	10709	protein_coding	otogelin [Source:HGNC Symbol;Acc:HGNC:8516]	VWD	112	95	0	1	0.294697	0.278162	0	0.00356574
ENSG00000135917	65.7003	61.4964	1.39158	2.08696	5.16367	6.31794e-06	5.34793e-05	SLC19A3	2	227683763	227718031	-	7738	protein_coding	solute carrier family 19 member 3 [Source:HGNC Symbol;Acc:HGNC:16266]	-	86	72	1	2	0.313167	0.29176	0.00653319	0.00986961
ENSG00000213160	2136.79	2264.26	228.219	528	2.53925	6.35122e-06	5.37418e-05	KLHL23	2	169694488	169776989	+	5509	protein_coding	kelch like family member 23 [Source:HGNC Symbol;Acc:HGNC:27506]	BTB	2797	2651	164	506	14.3063	15.089	1.50496	3.50733
novel.310	118.413	77.7246	8.34947	8.34782	3.55478	6.3753e-06	5.39262e-05	-	CHR_HG76_PATCH	12395119	12466086	-	2647	-	-	-	155	91	6	8	1.65	1.07798	0.114591	0.115408
ENSG00000221818	56.5328	83.7034	0	4.17391	4.94431	6.3819e-06	5.39627e-05	EBF2	8	25841730	26045397	-	7077	protein_coding	early B cell factor 2 [Source:HGNC Symbol;Acc:HGNC:19090]	TIG	74	98	0	4	0.294638	0.43421	0	0.0215829
ENSG00000065609	85.5631	86.2658	6.95789	6.26087	3.70518	6.42493e-06	5.42877e-05	SNAP91	6	83552880	83709691	-	6651	protein_coding	synaptosome associated protein 91 [Source:HGNC Symbol;Acc:HGNC:14986]	-	112	101	5	6	0.474501	0.476164	0.0380047	0.0344479
ENSG00000179361	1905.31	2003.76	460.613	177.391	2.61732	6.45593e-06	5.44911e-05	ARID3B	15	74541177	74598131	+	6212	protein_coding	AT-rich interaction domain 3B [Source:HGNC Symbol;Acc:HGNC:14350]	ARID	2494	2346	331	170	11.3128	11.8418	2.69371	1.045
ENSG00000171246	401.841	415.101	87.6695	42.7826	2.65433	6.50651e-06	5.48624e-05	NPTX1	17	80467148	80477843	-	6703	protein_coding	neuronal pentraxin 1 [Source:HGNC Symbol;Acc:HGNC:7952]	-	526	486	63	41	2.21117	2.27347	0.475144	0.233568
ENSG00000198513	137.512	118.722	4.17474	17.7391	3.50791	6.50689e-06	5.48624e-05	ATL1	14	50532509	50633068	+	4360	protein_coding	atlastin GTPase 1 [Source:HGNC Symbol;Acc:HGNC:11231]	-	180	139	3	17	1.1633	0.999657	0.0347847	0.148889
ENSG00000267313	42.7816	47.8305	0	0	7.67504	6.52383e-06	5.49856e-05	AC021504.1	18	41465783	41632185	-	5180	lincRNA	-	-	56	56	0	0	0.304624	0.338985	0	0
ENSG00000184304	524.838	433.037	76.5368	98.0869	2.4533	6.62542e-06	5.57622e-05	PRKD1	14	29576479	30191898	-	5187	protein_coding	protein kinase D1 [Source:HGNC Symbol;Acc:HGNC:9407]	C1_1	687	507	55	94	3.73205	3.06489	0.536044	0.692007
ENSG00000173917	241.41	288.691	36.181	48	2.64991	6.74985e-06	5.6668e-05	HOXB2	17	48540894	48544989	-	2336	protein_coding	homeobox B2 [Source:HGNC Symbol;Acc:HGNC:5113]	Homeobox	316	338	26	46	3.81172	4.53698	0.562671	0.751941
ENSG00000174130	83.2713	71.7458	0	6.26087	4.52191	6.77859e-06	5.68891e-05	TLR6	4	38823715	38856817	-	6035	protein_coding	toll like receptor 6 [Source:HGNC Symbol;Acc:HGNC:16711]	TIR	109	84	0	6	0.508927	0.43644	0	0.0379641
ENSG00000207870	40.4897	49.5388	0	0	7.66556	6.87031e-06	5.75974e-05	MIR221	X	45746157	45746266	-	110	miRNA	microRNA 221 [Source:HGNC Symbol;Acc:HGNC:31601]	-	53	58	0	0	13.5766	16.5332	0	0
ENSG00000133111	955.71	950.632	102.977	223.304	2.54301	6.88851e-06	5.77295e-05	RFXAP	13	36819224	36829104	+	2306	protein_coding	regulatory factor X associated protein [Source:HGNC Symbol;Acc:HGNC:9988]	-	1251	1113	74	214	15.2864	15.1342	1.62228	3.54367
ENSG00000076356	556.924	528.698	108.543	25.0435	3.03315	6.92673e-06	5.80086e-05	PLXNA2	1	208022242	208244320	-	13781	protein_coding	plexin A2 [Source:HGNC Symbol;Acc:HGNC:9100]	Sema	729	619	78	24	1.49057	1.40842	0.286133	0.0665012
ENSG00000250510	80.2154	73.454	6.95789	1.04348	4.34684	7.01354e-06	5.87148e-05	GPR162	12	6821545	6829972	+	3295	protein_coding	G protein-coupled receptor 162 [Source:HGNC Symbol;Acc:HGNC:16693]	7tm_1	105	86	5	1	0.897925	0.8184	0.0767129	0.0115889
ENSG00000185829	67.9921	65.767	2.78316	0	5.75415	7.16822e-06	5.9946e-05	ARL17A	17	46516702	46579682	-	5211	protein_coding	ADP ribosylation factor like GTPase 17A [Source:HGNC Symbol;Acc:HGNC:24096]	Arf	89	77	2	0	0.481255	0.463332	0.0194027	0
ENSG00000223960	310.93	347.625	15.3074	62.6087	3.0631	7.22397e-06	6.03267e-05	AC009948.1	2	178413939	178440243	+	4001	antisense	-	-	407	407	11	60	2.86637	3.18969	0.138988	0.57264
ENSG00000113966	434.691	453.536	27.8316	91.8261	2.8813	7.2836e-06	6.07173e-05	ARL6	3	97764521	97801242	+	4574	protein_coding	ADP ribosylation factor like GTPase 6 [Source:HGNC Symbol;Acc:HGNC:13210]	Arf	569	531	20	88	3.50528	3.64016	0.221048	0.734658
ENSG00000164749	120.705	138.367	16.6989	13.5652	3.10395	7.28931e-06	6.07434e-05	HNF4G	8	75407914	75566843	+	4806	protein_coding	hepatocyte nuclear factor 4 gamma [Source:HGNC Symbol;Acc:HGNC:5026]	Hormone_recep	158	162	12	13	0.92636	1.05695	0.126227	0.10329
ENSG00000118514	63.4084	72.5999	0	4.17391	4.9001	7.32667e-06	6.10332e-05	ALDH8A1	6	134917390	134950122	-	2868	protein_coding	aldehyde dehydrogenase 8 family member A1 [Source:HGNC Symbol;Acc:HGNC:15471]	Aldedh	83	85	0	4	0.815465	0.929314	0	0.0532574
ENSG00000163006	1569.17	1569.01	55.6632	309.913	3.0976	7.69587e-06	6.38608e-05	CCDC138	2	108786757	108885477	+	5796	protein_coding	coiled-coil domain containing 138 [Source:HGNC Symbol;Acc:HGNC:26531]	-	2054	1837	40	297	9.9857	9.9381	0.348887	1.95671
novel.121	85.5631	82.8493	2.78316	8.34782	3.87292	7.7639e-06	6.43575e-05	-	20	30570783	30580092	-	880	-	-	-	112	97	2	8	3.58626	3.4563	0.114895	0.347141
ENSG00000272942	44.3095	43.5599	0	0	7.63093	7.80219e-06	6.46522e-05	AL022324.3	22	25434324	25435070	-	747	lincRNA	-	-	58	51	0	0	2.18783	2.14078	0	0
ENSG00000196689	290.303	252.818	48.7053	41.7391	2.58876	7.86038e-06	6.50659e-05	TRPV1	17	3565444	3609411	-	5237	protein_coding	transient receptor potential cation channel subfamily V member 1 [Source:HGNC Symbol;Acc:HGNC:12716]	Ion_trans	380	296	35	40	2.0446	1.77228	0.337862	0.29166
ENSG00000145244	66.4642	64.9129	0	2.08696	5.82349	7.95339e-06	6.57896e-05	CORIN	4	47593998	47838106	-	10087	protein_coding	corin, serine peptidase [Source:HGNC Symbol;Acc:HGNC:19012]	Trypsin	87	76	0	2	0.243032	0.236251	0	0.00757124
ENSG00000274827	32.0862	57.2258	0	0	7.65342	8.18061e-06	6.75745e-05	LINC01297	14	19344578	19384587	-	4414	lincRNA	long intergenic non-protein coding RNA 1297 [Source:HGNC Symbol;Acc:HGNC:50443]	-	42	67	0	0	0.268116	0.475954	0	0
ENSG00000235023	58.8247	30.7482	0	0	7.65966	8.27861e-06	6.83601e-05	AP001626.1	21	42648271	42651244	-	2854	antisense	-	-	77	36	0	0	0.760227	0.395522	0	0
ENSG00000146070	48.8932	38.4352	0	0	7.62242	8.29232e-06	6.84493e-05	PLA2G7	6	46704201	46735693	-	2026	protein_coding	phospholipase A2 group VII [Source:HGNC Symbol;Acc:HGNC:9040]	PAF-AH_p_II	64	45	0	0	0.890117	0.696459	0	0
ENSG00000169184	249.05	218.654	33.3979	40.6956	2.6547	8.376e-06	6.90917e-05	MN1	22	27748277	27801498	-	7693	protein_coding	MN1 proto-oncogene, transcriptional regulator [Source:HGNC Symbol;Acc:HGNC:7180]	-	326	256	24	39	1.19407	1.04344	0.157714	0.193583
ENSG00000117152	49.6572	37.5811	0	0	7.621	8.41264e-06	6.93698e-05	RGS4	1	163068775	163076802	+	4836	protein_coding	regulator of G protein signaling 4 [Source:HGNC Symbol;Acc:HGNC:10000]	RGS	65	44	0	0	0.378733	0.285292	0	0
ENSG00000105825	141.332	104.202	11.1326	15.6522	3.18597	8.45159e-06	6.96666e-05	TFPI2	7	93885397	93890991	-	2663	protein_coding	tissue factor pathway inhibitor 2 [Source:HGNC Symbol;Acc:HGNC:11761]	Kunitz_BPTI	185	122	8	15	1.95752	1.43652	0.15187	0.215089
ENSG00000120647	743.33	749.914	102.977	175.304	2.42062	8.48741e-06	6.98886e-05	CCDC77	12	389273	442645	+	3614	protein_coding	coiled-coil domain containing 77 [Source:HGNC Symbol;Acc:HGNC:28203]	-	973	878	74	168	7.58632	7.61779	1.03514	1.77509
ENSG00000164900	69.52	60.6423	0	2.08696	5.81054	8.62601e-06	7.08786e-05	GBX1	7	151148589	151174745	-	1467	protein_coding	gastrulation brain homeobox 1 [Source:HGNC Symbol;Acc:HGNC:4185]	-	91	71	0	2	1.7479	1.51758	0	0.0520593
ENSG00000226383	83.2713	88.8281	0	8.34782	4.27104	8.71408e-06	7.15555e-05	LINC01876	2	156011530	156254950	-	2716	lincRNA	long intergenic non-protein coding RNA 1876 [Source:HGNC Symbol;Acc:HGNC:52695]	-	109	104	0	8	1.13085	1.20068	0	0.112476
ENSG00000020181	747.913	826.785	178.122	58.4348	2.74055	8.92628e-06	7.32216e-05	ADGRA2	8	37784191	37844896	+	7061	protein_coding	adhesion G protein-coupled receptor A2 [Source:HGNC Symbol;Acc:HGNC:17849]	7tm_2	979	968	128	56	3.90682	4.29865	0.916426	0.302845
ENSG00000151572	84.7992	71.7458	0	1.04348	7.03837	8.96519e-06	7.35152e-05	ANO4	12	100717526	101128641	+	4997	protein_coding	anoctamin 4 [Source:HGNC Symbol;Acc:HGNC:23837]	-	111	84	0	1	0.625922	0.527099	0	0.00764169
ENSG00000154240	306.347	334.814	23.6568	65.7391	2.82977	8.97835e-06	7.35975e-05	CEP112	17	65635538	66192084	-	7849	protein_coding	centrosomal protein 112 [Source:HGNC Symbol;Acc:HGNC:28514]	-	401	392	17	63	1.43958	1.56601	0.109493	0.306496
ENSG00000250462	404.897	393.748	8.34947	68.8695	3.35319	9.03705e-06	7.40273e-05	LRRC37BP1	17	30629680	30637466	+	5202	transcribed_unprocessed_pseudogene	leucine rich repeat containing 37B pseudogene 1 [Source:HGNC Symbol;Acc:HGNC:25390]	-	530	461	6	66	2.87086	2.77877	0.0583089	0.484476
ENSG00000165084	69.52	63.2046	0	4.17391	4.86569	9.09333e-06	7.43851e-05	C8orf34	8	68330722	68819022	+	10499	protein_coding	chromosome 8 open reading frame 34 [Source:HGNC Symbol;Acc:HGNC:30905]	-	91	74	0	4	0.24423	0.221007	0	0.0145483
ENSG00000130829	1225.39	1228.22	278.316	81.3913	2.77403	9.11321e-06	7.45219e-05	DUSP9	X	153642492	153651326	+	2776	protein_coding	dual specificity phosphatase 9 [Source:HGNC Symbol;Acc:HGNC:3076]	DSPc	1604	1438	200	78	16.2814	16.2428	3.6422	1.07294
ENSG00000146243	233.771	236.59	8.34947	41.7391	3.20735	9.14005e-06	7.47155e-05	IRAK1BP1	6	78867472	78946440	+	7542	protein_coding	interleukin 1 receptor associated kinase 1 binding protein 1 [Source:HGNC Symbol;Acc:HGNC:17368]	-	306	277	6	40	1.14325	1.15164	0.0402178	0.202522
ENSG00000145642	47.3653	38.4352	0	0	7.5969	9.15979e-06	7.4851e-05	SHISAL2B	5	64690308	64718090	+	1348	protein_coding	shisa like 2B [Source:HGNC Symbol;Acc:HGNC:34236]	-	62	45	0	0	1.29601	1.04676	0	0
ENSG00000143479	375.867	409.122	51.4884	84.5217	2.52345	9.17224e-06	7.49267e-05	DYRK3	1	206635536	206684419	+	4218	protein_coding	dual specificity tyrosine phosphorylation regulated kinase 3 [Source:HGNC Symbol;Acc:HGNC:3094]	-	492	479	37	81	3.28674	3.56083	0.443454	0.733293
ENSG00000196159	773.888	745.644	164.206	148.174	2.28289	9.18625e-06	7.50152e-05	FAT4	4	125316399	125492932	+	16439	protein_coding	FAT atypical cadherin 4 [Source:HGNC Symbol;Acc:HGNC:23109]	Cadherin	1013	873	118	142	1.73636	1.66518	0.362878	0.329846
ENSG00000162174	712.771	765.288	129.417	166.956	2.3166	9.191e-06	7.5028e-05	ASRGL1	11	62337448	62393412	+	4586	protein_coding	asparaginase like 1 [Source:HGNC Symbol;Acc:HGNC:16448]	Asparaginase_2	933	896	93	160	5.73263	6.12628	1.02519	1.33225
ENSG00000186472	540.881	615.818	105.76	122.087	2.34268	9.23576e-06	7.53381e-05	PCLO	7	82754013	83162930	-	22873	protein_coding	piccolo presynaptic cytomatrix protein [Source:HGNC Symbol;Acc:HGNC:13406]	C2	708	721	76	117	0.872201	0.988405	0.167975	0.195327
ENSG00000128881	701.312	675.606	80.7116	161.739	2.50131	9.23856e-06	7.53381e-05	TTBK2	15	42738734	42920809	-	12917	protein_coding	tau tubulin kinase 2 [Source:HGNC Symbol;Acc:HGNC:19141]	Pkinase	918	791	58	155	2.00257	1.92016	0.226997	0.458215
ENSG00000077264	56.5328	69.1834	1.39158	1.04348	5.71282	9.25429e-06	7.54404e-05	PAK3	X	110944285	111227361	+	10312	protein_coding	p21 (RAC1) activated kinase 3 [Source:HGNC Symbol;Acc:HGNC:8592]	Pkinase	74	81	1	1	0.202207	0.2463	0.00490242	0.00370302
ENSG00000219607	125.289	119.576	16.6989	11.4783	3.13138	9.285e-06	7.56646e-05	PPP1R3G	6	5084581	5089487	+	4907	protein_coding	protein phosphatase 1 regulatory subunit 3G [Source:HGNC Symbol;Acc:HGNC:14945]	-	164	140	12	11	0.941747	0.894612	0.123629	0.0856003
ENSG00000141449	1642.51	1590.36	310.322	382.956	2.22069	9.40233e-06	7.65414e-05	GREB1L	18	21242242	21525417	+	10572	protein_coding	growth regulation by estrogen in breast cancer 1 like [Source:HGNC Symbol;Acc:HGNC:31042]	-	2150	1862	223	367	5.73044	5.52262	1.06635	1.32559
ENSG00000162669	54.2409	32.4564	0	0	7.6124	9.43389e-06	7.67719e-05	HFM1	1	91260766	91404869	-	5827	protein_coding	HFM1, ATP dependent DNA helicase homolog [Source:HGNC Symbol;Acc:HGNC:20193]	Sec63	71	38	0	0	0.343336	0.204485	0	0
ENSG00000278053	745.622	954.902	32.0063	169.043	3.07317	9.46377e-06	7.68825e-05	DDX52	17	37609739	37643464	-	9546	protein_coding	DExD-box helicase 52 [Source:HGNC Symbol;Acc:HGNC:20038]	DEAD	976	1118	23	162	2.88094	3.67234	0.121804	0.648026
ENSG00000117600	41.2537	43.5599	0	0	7.57973	9.6576e-06	7.83494e-05	PLPPR4	1	99263953	99309590	+	5540	protein_coding	phospholipid phosphatase related 4 [Source:HGNC Symbol;Acc:HGNC:23496]	-	54	51	0	0	0.274657	0.288658	0	0
novel.39	42.0176	42.7058	0	0	7.57827	9.70645e-06	7.87186e-05	-	11	67112477	67118769	-	666	-	-	-	55	50	0	0	2.32699	2.35406	0	0
ENSG00000285190	42.7816	41.8517	0	0	7.5768	9.76767e-06	7.91607e-05	AC018754.1	5	87412342	87499340	+	2113	antisense	-	-	56	49	0	0	0.746784	0.727142	0	0
novel.519	10.6954	97.3693	0	0	7.92761	9.81905e-06	7.95225e-05	-	CHR_HSCHR20_1_CTG4	63433679	63447968	-	961	-	PF00520:Ion transport protein	Ion_trans	14	114	0	0	0.410498	3.71967	0	0
ENSG00000255893	43.5455	40.9976	0	0	7.57533	9.84155e-06	7.96774e-05	AP000786.1	11	94472908	94473570	-	581	antisense	-	-	57	48	0	0	2.76443	2.59052	0	0
ENSG00000077616	63.4084	25.6235	0	0	7.65123	9.94838e-06	8.04595e-05	NAALAD2	11	90131515	90192894	+	7254	protein_coding	N-acetylated alpha-linked acidic dipeptidase 2 [Source:HGNC Symbol;Acc:HGNC:14526]	TFR_dimer	83	30	0	0	0.322409	0.129678	0	0
ENSG00000069482	1745.64	1773.15	424.432	334.956	2.2128	1.01191e-05	8.17842e-05	GAL	11	68683779	68691175	+	1300	protein_coding	galanin and GMAP prepropeptide [Source:HGNC Symbol;Acc:HGNC:4114]	-	2285	2076	305	321	49.5278	50.0733	11.8607	9.42889
ENSG00000176681	84.0352	69.1834	0	1.04348	7.00753	1.01244e-05	8.17991e-05	LRRC37A	17	46292733	46337794	+	6506	protein_coding	leucine rich repeat containing 37A [Source:HGNC Symbol;Acc:HGNC:29069]	-	110	81	0	1	0.476415	0.390385	0	0.00586928
ENSG00000101265	219.256	255.381	25.0484	45.913	2.73127	1.0267e-05	8.28657e-05	RASSF2	20	4780023	4823645	-	5759	protein_coding	Ras association domain family member 2 [Source:HGNC Symbol;Acc:HGNC:9883]	RA	287	299	18	44	1.40424	1.62797	0.158008	0.291746
ENSG00000197380	84.7992	81.9952	4.17474	8.34782	3.70544	1.0423e-05	8.40106e-05	DACT3	19	46647612	46661138	-	5361	protein_coding	dishevelled binding antagonist of beta catenin 3 [Source:HGNC Symbol;Acc:HGNC:30745]	-	111	96	3	8	0.583423	0.561498	0.0282898	0.0569827
ENSG00000059588	3348.42	3406.22	553.848	862.956	2.25262	1.04375e-05	8.40986e-05	TARBP1	1	234391313	234479103	-	7743	protein_coding	TAR (HIV-1) RNA binding protein 1 [Source:HGNC Symbol;Acc:HGNC:11568]	SpoU_methylase	4383	3988	398	827	15.9503	16.1498	2.59853	4.07845
ENSG00000159905	84.7992	85.4117	6.95789	7.30435	3.57489	1.06394e-05	8.56376e-05	ZNF221	19	43951223	43967709	+	2717	protein_coding	zinc finger protein 221 [Source:HGNC Symbol;Acc:HGNC:13014]	KRAB	111	100	5	7	1.15117	1.15407	0.0930324	0.0983801
ENSG00000283696	51.949	70.0376	2.78316	1.04348	5.06016	1.06875e-05	8.59954e-05	AL592295.4	1	161399409	161422424	+	997	lincRNA	-	-	68	82	2	1	1.92185	2.57894	0.101412	0.0383004
ENSG00000214194	1883.92	1881.62	109.935	425.739	2.81064	1.07538e-05	8.64997e-05	SMIM30	7	113116718	113118613	-	1896	protein_coding	small integral membrane protein 30 [Source:HGNC Symbol;Acc:HGNC:48953]	-	2466	2203	79	408	36.6489	36.4333	2.10641	8.21714
ENSG00000112290	3017.63	3036.38	711.097	652.174	2.15095	1.09918e-05	8.82338e-05	WASF1	6	110099819	110180004	-	3260	protein_coding	WAS protein family member 1 [Source:HGNC Symbol;Acc:HGNC:12732]	-	3950	3555	511	625	34.1418	34.1936	7.92423	7.32085
ENSG00000274386	71.8119	58.0799	1.39158	4.17391	4.48499	1.10128e-05	8.83719e-05	TMEM269	1	42785007	42816619	+	4373	protein_coding	transmembrane protein 269 [Source:HGNC Symbol;Acc:HGNC:52381]	-	94	68	1	4	0.605696	0.487587	0.0115604	0.0349285
ENSG00000142149	614.221	632.046	136.375	116.87	2.30013	1.10219e-05	8.84152e-05	HUNK	21	31873315	32044633	+	8294	protein_coding	hormonally up-regulated Neu-associated kinase [Source:HGNC Symbol;Acc:HGNC:13326]	Pkinase	804	740	98	112	2.73148	2.79763	0.597332	0.515647
ENSG00000198780	815.142	802.015	69.5789	189.913	2.63465	1.10304e-05	8.84528e-05	FAM169A	5	74777574	74866951	-	6860	protein_coding	family with sequence similarity 169 member A [Source:HGNC Symbol;Acc:HGNC:29138]	-	1067	939	50	182	4.38275	4.29204	0.368468	1.01309
ENSG00000143702	338.433	326.273	8.34947	59.4782	3.27345	1.10396e-05	8.84965e-05	CEP170	1	243124428	243255348	-	10939	protein_coding	centrosomal protein 170 [Source:HGNC Symbol;Acc:HGNC:28920]	FHA	443	382	6	57	1.14112	1.09499	0.0277286	0.198974
ENSG00000173208	47.3653	35.8729	0	0	7.55329	1.11213e-05	8.90608e-05	ABCD2	12	39550033	39619751	-	6238	protein_coding	ATP binding cassette subfamily D member 2 [Source:HGNC Symbol;Acc:HGNC:66]	ABC_tran	62	42	0	0	0.280061	0.211119	0	0
ENSG00000110786	44.3095	38.4352	0	0	7.54447	1.12598e-05	9.01398e-05	PTPN5	11	18727928	18792721	-	5497	protein_coding	protein tyrosine phosphatase, non-receptor type 5 [Source:HGNC Symbol;Acc:HGNC:9657]	Y_phosphatase	58	45	0	0	0.297309	0.25669	0	0
ENSG00000136114	100.078	81.9952	4.17474	10.4348	3.60448	1.1441e-05	9.1559e-05	THSD1	13	52377167	52406494	-	3348	protein_coding	thrombospondin type 1 domain containing 1 [Source:HGNC Symbol;Acc:HGNC:17754]	-	131	96	3	10	1.10253	0.899101	0.0452991	0.114055
ENSG00000141485	41.2537	40.9976	0	0	7.53559	1.15766e-05	9.25502e-05	SLC13A5	17	6684713	6713567	-	9020	protein_coding	solute carrier family 13 member 5 [Source:HGNC Symbol;Acc:HGNC:23089]	Na_sulph_symp	54	48	0	0	0.168692	0.166862	0	0
ENSG00000125848	451.498	446.703	55.6632	102.261	2.5021	1.17409e-05	9.37682e-05	FLRT3	20	14322988	14337616	-	5190	protein_coding	fibronectin leucine rich transmembrane protein 3 [Source:HGNC Symbol;Acc:HGNC:3762]	-	591	523	40	98	3.20868	3.15978	0.389625	0.721037
ENSG00000101972	18154.7	18267	1714.43	4608	2.52602	1.19286e-05	9.51389e-05	STAG2	X	123960212	124422664	+	8187	protein_coding	stromal antigen 2 [Source:HGNC Symbol;Acc:HGNC:11355]	-	23764	21387	1232	4416	81.7902	81.912	7.60746	20.597
ENSG00000156876	1622.64	1536.56	111.326	371.478	2.70705	1.19431e-05	9.5222e-05	SASS6	1	100083563	100132955	-	3972	protein_coding	SAS-6 centriolar assembly protein [Source:HGNC Symbol;Acc:HGNC:25403]	-	2124	1799	80	356	15.0679	14.2018	1.0182	3.42247
ENSG00000148803	657.767	642.296	155.857	93.913	2.38332	1.23946e-05	9.86222e-05	FUOM	10	133355154	133358035	-	1284	protein_coding	fucose mutarotase [Source:HGNC Symbol;Acc:HGNC:24733]	-	861	752	112	90	18.8949	18.3643	4.40968	2.67656
ENSG00000069248	6476.82	6461.39	898.96	1700.87	2.31471	1.24966e-05	9.93335e-05	NUP133	1	229440260	229508341	-	6080	protein_coding	nucleoporin 133 [Source:HGNC Symbol;Acc:HGNC:18016]	-	8478	7565	646	1630	39.2913	39.0147	5.37134	10.2372
ENSG00000245648	52.713	71.7458	0	2.08696	5.74642	1.26464e-05	0.000100422	AC022075.1	12	10363769	10398506	+	2830	antisense	-	-	69	84	0	2	0.68702	0.930712	0	0.0269862
ENSG00000141698	4301.08	4566.96	1121.61	862.956	2.16006	1.26812e-05	0.000100665	NT5C3B	17	41825181	41836263	-	2730	protein_coding	5'-nucleotidase, cytosolic IIIB [Source:HGNC Symbol;Acc:HGNC:28300]	-	5630	5347	806	827	58.1102	61.4144	14.9254	11.5676
ENSG00000158691	547.757	562.009	8.34947	93.913	3.42671	1.27389e-05	0.000101055	ZSCAN12	6	28378955	28399734	-	5495	protein_coding	zinc finger and SCAN domain containing 12 [Source:HGNC Symbol;Acc:HGNC:13172]	SCAN	717	658	6	90	3.6767	3.75475	0.0551998	0.625423
ENSG00000087842	1103.15	1007	198.996	250.435	2.2302	1.27933e-05	0.000101452	PIR	X	15384799	15493564	-	2512	protein_coding	pirin [Source:HGNC Symbol;Acc:HGNC:30048]	-	1444	1179	143	240	16.1977	14.7169	2.87786	3.6483
ENSG00000278763	37.4339	43.5599	0	0	7.51307	1.28129e-05	0.000101574	FAM27B	9	67725690	67725902	-	213	processed_pseudogene	family with sequence similarity 27 member B [Source:HGNC Symbol;Acc:HGNC:23667]	-	49	51	0	0	6.48221	7.50781	0	0
ENSG00000164070	2172.69	2268.53	247.701	566.609	2.44572	1.30304e-05	0.00010316	HSPA4L	4	127781821	127840733	+	11621	protein_coding	heat shock protein family A (Hsp70) member 4 like [Source:HGNC Symbol;Acc:HGNC:17041]	HSP70	2844	2656	178	543	6.89592	7.1665	0.774337	1.78425
ENSG00000246465	291.831	267.338	51.4884	48	2.49181	1.3141e-05	0.000103931	AC138904.1	16	28284885	28292064	-	2481	lincRNA	-	-	382	313	37	46	4.33853	3.95585	0.753926	0.707994
ENSG00000233461	414.828	450.119	97.4105	64.6956	2.41968	1.32069e-05	0.000104417	AL445524.1	1	231522388	231528556	-	1021	antisense	-	-	543	527	70	62	14.9858	16.1848	3.46598	2.31881
ENSG00000179859	175.71	152.033	22.2653	25.0435	2.78973	1.32146e-05	0.000104443	RNF227	17	7913324	7916276	-	2953	protein_coding	ring finger protein 227 [Source:HGNC Symbol;Acc:HGNC:27571]	-	230	178	16	24	2.19468	1.89008	0.273911	0.310346
ENSG00000101204	34.378	46.1223	0	0	7.504	1.36353e-05	0.000107444	CHRNA4	20	63343223	63378401	-	11049	protein_coding	cholinergic receptor nicotinic alpha 4 subunit [Source:HGNC Symbol;Acc:HGNC:1958]	Neur_chan_memb	45	54	0	0	0.114761	0.153247	0	0
ENSG00000182175	575.259	627.776	144.724	67.8261	2.50599	1.37847e-05	0.000108513	RGMA	15	93035273	93089204	-	13141	protein_coding	repulsive guidance molecule BMP co-receptor a [Source:HGNC Symbol;Acc:HGNC:30308]	-	753	735	104	65	1.61463	1.75381	0.400091	0.188879
ENSG00000225828	216.964	201.572	37.5726	30.2609	2.62951	1.41492e-05	0.000111197	FAM229A	1	32361270	32364278	-	2845	protein_coding	family with sequence similarity 229 member A [Source:HGNC Symbol;Acc:HGNC:44652]	Pkinase	284	236	27	29	2.81282	2.60107	0.479772	0.389237
ENSG00000104044	24.4466	58.934	0	0	7.55386	1.43605e-05	0.00011282	OCA2	15	27754875	28099358	-	3299	protein_coding	OCA2 melanosomal transmembrane protein [Source:HGNC Symbol;Acc:HGNC:8101]	-	32	69	0	0	0.273322	0.655827	0	0
ENSG00000000005	36.6699	42.7058	0	0	7.48395	1.44377e-05	0.000113388	TNMD	X	100584802	100599885	+	1610	protein_coding	tenomodulin [Source:HGNC Symbol;Acc:HGNC:17757]	-	48	50	0	0	0.840082	0.973793	0	0
ENSG00000103494	624.916	592.757	97.4105	144	2.33179	1.44657e-05	0.000113571	RPGRIP1L	16	53598153	53703938	-	12387	protein_coding	RPGRIP1 like [Source:HGNC Symbol;Acc:HGNC:29168]	C2	818	694	70	138	1.86077	1.75677	0.285684	0.425414
ENSG00000182168	857.159	925.862	187.863	198.261	2.20689	1.45718e-05	0.000114327	UNC5C	4	95162504	95549206	-	10685	protein_coding	unc-5 netrin receptor C [Source:HGNC Symbol;Acc:HGNC:12569]	Death	1122	1084	135	190	2.95886	3.1811	0.638724	0.679013
ENSG00000158077	44.3095	35.0188	0	0	7.48381	1.46519e-05	0.00011488	NLRP14	11	7020446	7071308	+	3628	protein_coding	NLR family pyrin domain containing 14 [Source:HGNC Symbol;Acc:HGNC:22939]	NACHT	58	41	0	0	0.450471	0.354355	0	0
ENSG00000203877	45.0734	34.1647	0	0	7.48224	1.48732e-05	0.000116516	RIPPLY2	6	83853266	83857515	+	4172	protein_coding	ripply transcriptional repressor 2 [Source:HGNC Symbol;Acc:HGNC:21390]	-	59	40	0	0	0.398487	0.300634	0	0
ENSG00000197056	1259	1211.99	68.1874	280.696	2.82006	1.48804e-05	0.000116516	ZMYM1	1	35059786	35115859	+	4828	protein_coding	zinc finger MYM-type containing 1 [Source:HGNC Symbol;Acc:HGNC:26253]	hATC	1648	1419	49	269	9.61826	9.2159	0.513077	2.12757
ENSG00000152193	972.517	1019.82	73.7537	236.869	2.67669	1.49529e-05	0.000117046	RNF219	13	78614291	78659179	-	3529	protein_coding	ring finger protein 219 [Source:HGNC Symbol;Acc:HGNC:20308]	-	1273	1194	53	227	10.1644	10.609	0.759238	2.45625
ENSG00000164542	709.716	705.5	94.6274	174.261	2.39229	1.52301e-05	0.000119017	KIAA0895	7	36324221	36390125	-	6728	protein_coding	KIAA0895 [Source:HGNC Symbol;Acc:HGNC:22206]	-	929	826	68	167	3.89078	3.84961	0.510948	0.947827
novel.625	14.5152	76.8705	0	0	7.68565	1.5314e-05	0.000119594	-	CHR_HSCHR6_MHC_MCF_CTG1	30568162	30568978	+	573	-	PF00129:Class I Histocompatibility antigen, domains alpha 1 and 2	MHC_I	19	90	0	0	0.934341	4.92505	0	0
ENSG00000250159	35.906	42.7058	0	0	7.46996	1.5328e-05	0.000119624	AC106791.1	5	137814333	137889336	-	1675	antisense	-	-	47	50	0	0	0.790659	0.936004	0	0
ENSG00000138738	379.686	381.79	40.3558	86.6087	2.57639	1.53473e-05	0.000119735	PRDM5	4	120684919	120922870	-	9517	protein_coding	PR/SET domain 5 [Source:HGNC Symbol;Acc:HGNC:9349]	-	497	447	29	83	1.47151	1.47275	0.154046	0.333025
ENSG00000188779	75.6317	76.8705	5.56632	6.26087	3.68307	1.54547e-05	0.000120443	SKOR1	15	67819704	67834561	+	4479	protein_coding	SKI family transcriptional corepressor 1 [Source:HGNC Symbol;Acc:HGNC:21326]	-	99	90	4	6	0.622817	0.630063	0.0451474	0.0511528
ENSG00000152932	38.1978	40.1435	0	0	7.46522	1.54636e-05	0.000120443	RAB3C	5	58582221	58859394	+	9656	protein_coding	RAB3C, member RAS oncogene family [Source:HGNC Symbol;Acc:HGNC:30269]	Ras	50	47	0	0	0.145908	0.152624	0	0
ENSG00000128578	692.145	611.547	121.067	149.217	2.26868	1.55723e-05	0.000121176	STRIP2	7	129434433	129488399	+	5876	protein_coding	striatin interacting protein 2 [Source:HGNC Symbol;Acc:HGNC:22209]	-	906	716	87	143	4.34463	3.8208	0.748499	0.929294
ENSG00000136098	650.127	644.858	69.5789	157.565	2.50614	1.56968e-05	0.000122019	NEK3	13	52132639	52159861	-	4272	protein_coding	NIMA related kinase 3 [Source:HGNC Symbol;Acc:HGNC:7746]	Pkinase	851	755	50	151	5.61313	5.54164	0.591688	1.34972
ENSG00000145358	100.078	109.327	4.17474	14.6087	3.43953	1.57509e-05	0.000122399	DDIT4L	4	100185870	100190782	-	2994	protein_coding	DNA damage inducible transcript 4 like [Source:HGNC Symbol;Acc:HGNC:30555]	-	131	128	3	14	1.23289	1.34054	0.0506551	0.178556
ENSG00000271576	110.774	113.597	15.3074	1.04348	3.84119	1.60289e-05	0.000124477	AL359504.2	1	84076331	84077931	-	1601	lincRNA	-	-	145	133	11	1	2.55201	2.60485	0.34734	0.023851
ENSG00000151500	790.695	854.117	130.808	203.478	2.2964	1.60407e-05	0.000124528	THYN1	11	134248279	134253370	-	2119	protein_coding	thymocyte nuclear protein 1 [Source:HGNC Symbol;Acc:HGNC:29560]	-	1035	1000	94	195	13.7631	14.7976	2.24259	3.51401
ENSG00000102445	135.984	152.033	22.2653	17.7391	2.85377	1.65844e-05	0.000128411	RUBCNL	13	46342000	46438190	-	6105	protein_coding	RUN and cysteine rich domain containing beclin 1 interacting protein like [Source:HGNC Symbol;Acc:HGNC:20420]	-	178	178	16	17	0.821563	0.914233	0.132492	0.106332
ENSG00000182747	67.9921	48.6846	1.39158	1.04348	5.6058	1.66018e-05	0.000128504	SLC35D3	6	136922264	136925639	+	2359	protein_coding	solute carrier family 35 member D3 [Source:HGNC Symbol;Acc:HGNC:15621]	-	89	57	1	1	1.06309	0.757652	0.0214302	0.0161872
ENSG00000167920	447.679	505.637	101.585	91.8261	2.30213	1.69503e-05	0.000130871	TMEM99	17	40819106	40836274	+	2362	protein_coding	transmembrane protein 99 [Source:HGNC Symbol;Acc:HGNC:28305]	-	586	592	73	88	6.99076	7.85895	1.56242	1.42266
ENSG00000162616	577.551	599.59	40.3558	135.652	2.73391	1.6952e-05	0.000130871	DNAJB4	1	77979175	78017964	+	3783	protein_coding	DnaJ heat shock protein family (Hsp40) member B4 [Source:HGNC Symbol;Acc:HGNC:14886]	DnaJ_C	756	702	29	130	5.63108	5.81867	0.387539	1.31222
ENSG00000180190	38.1978	38.4352	0	0	7.43349	1.75856e-05	0.000135585	TDRP	8	489792	545781	-	3613	protein_coding	testis development related protein [Source:HGNC Symbol;Acc:HGNC:26951]	-	50	45	0	0	0.38995	0.390541	0	0
ENSG00000170425	447.679	427.912	96.0189	79.3043	2.32213	1.76099e-05	0.000135728	ADORA2B	17	15944917	15975746	+	2551	protein_coding	adenosine A2b receptor [Source:HGNC Symbol;Acc:HGNC:264]	7tm_1	586	501	69	76	6.47282	6.15814	1.36739	1.13763
ENSG00000109805	3745.68	3588.14	386.859	962.087	2.44172	1.79763e-05	0.000138371	NCAPG	4	17810902	17844862	+	4921	protein_coding	non-SMC condensin I complex subunit G [Source:HGNC Symbol;Acc:HGNC:24304]	-	4903	4201	278	922	28.0747	26.7684	2.85591	7.15445
ENSG00000132357	91.6748	73.454	2.78316	9.3913	3.71494	1.79976e-05	0.00013849	CARD6	5	40841184	40860175	+	4399	protein_coding	caspase recruitment domain family member 6 [Source:HGNC Symbol;Acc:HGNC:16394]	CARD	120	86	2	9	0.768659	0.613009	0.0229842	0.0781245
ENSG00000135638	68.7561	76.0164	4.17474	6.26087	3.77452	1.82339e-05	0.000140172	EMX1	2	72916260	72936071	+	5516	protein_coding	empty spiracles homeobox 1 [Source:HGNC Symbol;Acc:HGNC:3340]	-	90	89	3	6	0.459753	0.505928	0.0274948	0.0415361
ENSG00000157827	1710.5	1832.08	185.08	458.087	2.45946	1.83548e-05	0.000141054	FMNL2	2	152335237	152649834	+	6519	protein_coding	formin like 2 [Source:HGNC Symbol;Acc:HGNC:18267]	FH2	2239	2145	133	439	9.67786	10.3174	1.03139	2.57148
ENSG00000116350	5522.64	5365.56	1217.63	1354.43	2.08167	1.84806e-05	0.000141922	SRSF4	1	29147743	29181987	-	8893	protein_coding	serine and arginine rich splicing factor 4 [Source:HGNC Symbol;Acc:HGNC:10786]	RRM_1	7229	6282	875	1298	22.9053	22.1499	4.97409	5.57346
ENSG00000278704	56.5328	58.934	2.78316	2.08696	4.58607	1.85527e-05	0.00014239	BX004987.1	GL000009.2	56140	58376	-	2237	protein_coding	-	-	74	69	2	2	0.932121	0.967176	0.0451978	0.0341399
ENSG00000116981	84.0352	50.3929	5.56632	0	4.71986	1.89063e-05	0.000145009	NT5C1A	1	39659121	39672038	-	1107	protein_coding	5'-nucleotidase, cytosolic IA [Source:HGNC Symbol;Acc:HGNC:17819]	-	110	59	4	0	2.79996	1.67119	0.18267	0
ENSG00000169604	1954.96	2002.9	435.564	480	2.11176	1.89293e-05	0.00014512	ANTXR1	2	69013178	69249327	+	8185	protein_coding	anthrax toxin receptor 1 [Source:HGNC Symbol;Acc:HGNC:21014]	VWA	2559	2345	313	460	8.80964	8.98352	1.93321	2.14604
ENSG00000120440	38.9618	36.727	0	0	7.41573	1.89329e-05	0.00014512	TTLL2	6	167325086	167359503	+	3073	protein_coding	tubulin tyrosine ligase like 2 [Source:HGNC Symbol;Acc:HGNC:21211]	TTL	51	43	0	0	0.467643	0.438761	0	0
ENSG00000228340	43.5455	32.4564	0	0	7.42212	1.90605e-05	0.000145934	MIR646HG	20	60087840	60527458	+	5137	lincRNA	MIR646 host gene [Source:HGNC Symbol;Acc:HGNC:27659]	-	57	38	0	0	0.31266	0.231951	0	0
ENSG00000275325	59.5886	53.8093	1.39158	1.04348	5.56429	1.90639e-05	0.000145934	PDCD6IPP1	15	22727104	22744918	+	1283	transcribed_unprocessed_pseudogene	PDCD6IP pseudogene 1 [Source:HGNC Symbol;Acc:HGNC:49872]	-	78	63	1	1	1.71307	1.5397	0.0394028	0.0297627
ENSG00000085465	200.921	162.282	25.0484	31.3043	2.68372	1.91466e-05	0.000146472	OVGP1	1	111414314	111427777	-	2567	protein_coding	oviductal glycoprotein 1 [Source:HGNC Symbol;Acc:HGNC:8524]	-	263	190	18	30	2.88693	2.32087	0.354487	0.446266
ENSG00000272316	62.6444	66.6211	1.39158	5.21739	4.22553	1.92634e-05	0.000147222	AL021368.2	6	57908560	57913911	-	5352	lincRNA	-	-	82	78	1	5	0.431722	0.456984	0.00944578	0.0356741
ENSG00000272163	33.6141	41.8517	0	0	7.41095	1.96186e-05	0.000149743	AF106564.1	8	24912165	24914717	-	2553	antisense	-	Filament	44	49	0	0	0.485633	0.601822	0	0
ENSG00000145476	666.17	663.649	140.549	147.13	2.20839	1.97292e-05	0.000150539	CYP4V2	4	186191520	186213456	+	9807	protein_coding	cytochrome P450 family 4 subfamily V member 2 [Source:HGNC Symbol;Acc:HGNC:23198]	p450	872	777	101	141	2.50546	2.48432	0.520642	0.549012
ENSG00000107859	52.713	59.7882	2.78316	1.04348	4.94299	1.9764e-05	0.000150707	PITX3	10	102230186	102241474	-	1391	protein_coding	paired like homeodomain 3 [Source:HGNC Symbol;Acc:HGNC:9006]	Homeobox	69	70	2	1	1.39775	1.57795	0.072687	0.0274519
ENSG00000205683	197.865	187.052	23.6568	36.5217	2.6687	1.9847e-05	0.000151291	DPF3	14	72619296	72894116	-	6889	protein_coding	double PHD fingers 3 [Source:HGNC Symbol;Acc:HGNC:17427]	PHD	259	219	17	35	1.05938	0.996806	0.124752	0.194004
ENSG00000163328	306.347	349.334	36.181	74.0869	2.56343	1.99531e-05	0.00015205	GPR155	2	174431571	174487094	-	7769	protein_coding	G protein-coupled receptor 155 [Source:HGNC Symbol;Acc:HGNC:22951]	-	401	409	26	71	1.45441	1.65075	0.169185	0.348973
ENSG00000240291	77.1596	58.0799	0	1.04348	6.82822	2.01796e-05	0.000153578	AL450384.2	10	18513115	18545651	-	1575	antisense	-	-	101	68	0	1	1.80695	1.35379	0	0.0242448
ENSG00000171388	87.091	71.7458	8.34947	5.21739	3.57029	2.02344e-05	0.000153896	APLN	X	129645259	129654937	-	3205	protein_coding	apelin [Source:HGNC Symbol;Acc:HGNC:16665]	-	114	84	6	5	1.00227	0.821815	0.0946405	0.0595718
ENSG00000100564	899.177	867.782	180.905	209.739	2.17661	2.02888e-05	0.00015426	PIGH	14	67581955	67600287	-	2915	protein_coding	phosphatidylinositol glycan anchor biosynthesis class H [Source:HGNC Symbol;Acc:HGNC:8964]	-	1177	1016	130	201	11.3774	10.9289	2.25454	2.63303
ENSG00000147082	100.842	73.454	4.17474	10.4348	3.54231	2.03491e-05	0.000154619	CCNB3	X	50202713	50351910	+	5408	protein_coding	cyclin B3 [Source:HGNC Symbol;Acc:HGNC:18709]	Cyclin_C	132	86	3	10	0.687771	0.498637	0.0280439	0.0706093
ENSG00000186951	621.861	669.627	148.899	128.348	2.22076	2.0536e-05	0.000155889	PPARA	22	46150521	46243756	+	13219	protein_coding	peroxisome proliferator activated receptor alpha [Source:HGNC Symbol;Acc:HGNC:9232]	zf-C4	814	784	107	123	1.73513	1.85969	0.409203	0.355308
ENSG00000204923	108.482	94.8069	12.5242	10.4348	3.153	2.06796e-05	0.000156884	FBXO48	2	68459419	68467258	-	5666	protein_coding	F-box protein 48 [Source:HGNC Symbol;Acc:HGNC:33857]	-	142	111	9	10	0.706185	0.614284	0.0803008	0.0673942
ENSG00000060762	841.88	825.931	114.109	213.913	2.34297	2.06804e-05	0.000156884	MPC1	6	166364919	166383013	-	1546	protein_coding	mitochondrial pyruvate carrier 1 [Source:HGNC Symbol;Acc:HGNC:21606]	-	1102	967	82	205	20.0853	19.6128	2.68138	5.06341
ENSG00000142227	209.324	187.052	38.9642	24	2.66368	2.07022e-05	0.000156948	EMP3	19	48321509	48330553	+	1667	protein_coding	epithelial membrane protein 3 [Source:HGNC Symbol;Acc:HGNC:3335]	-	274	219	28	23	4.6315	4.11937	0.849134	0.526855
ENSG00000269707	44.3095	30.7482	0	0	7.40421	2.08933e-05	0.000158245	AC018730.2	2	104853285	104926052	+	443	sense_overlapping	-	-	58	36	0	0	3.68919	2.54813	0	0
ENSG00000267327	32.8501	41.8517	0	0	7.39623	2.09051e-05	0.000158283	AC009271.1	18	55893038	56023522	+	949	lincRNA	-	-	43	49	0	0	1.27676	1.61902	0	0
ENSG00000147234	154.319	136.659	22.2653	19.8261	2.79243	2.11071e-05	0.000159711	FRMPD3	X	107522450	107605251	+	9158	protein_coding	FERM and PDZ domain containing 3 [Source:HGNC Symbol;Acc:HGNC:29382]	Band_41	202	160	16	19	0.621523	0.547825	0.0883228	0.0792231
ENSG00000203805	47.3653	28.1858	0	0	7.41392	2.11321e-05	0.000159848	PLPP4	10	120456954	120589855	+	1785	protein_coding	phospholipid phosphatase 4 [Source:HGNC Symbol;Acc:HGNC:23531]	-	62	33	0	0	0.978723	0.579693	0	0
ENSG00000163531	338.433	280.15	69.5789	37.5652	2.53732	2.11931e-05	0.000160259	NFASC	1	204828651	205022822	+	21271	protein_coding	neurofascin [Source:HGNC Symbol;Acc:HGNC:29866]	I-set	443	328	50	36	0.586843	0.483513	0.118833	0.0646269
ENSG00000182103	58.0607	59.7882	4.17474	1.04348	4.57557	2.12435e-05	0.000160588	FAM181B	11	82729941	82733864	-	3924	protein_coding	family with sequence similarity 181 member B [Source:HGNC Symbol;Acc:HGNC:28512]	-	76	70	3	1	0.545747	0.55936	0.0386497	0.00973128
ENSG00000143995	489.696	486.846	97.4105	106.435	2.25944	2.1299e-05	0.000160956	MEIS1	2	66433452	66573869	+	10934	protein_coding	Meis homeobox 1 [Source:HGNC Symbol;Acc:HGNC:7000]	Coprinus_mating	641	570	70	102	1.65191	1.63463	0.323648	0.356221
ENSG00000104321	37.4339	36.727	0	0	7.38623	2.13101e-05	0.000160988	TRPA1	8	72019917	72075617	-	6377	protein_coding	transient receptor potential cation channel subfamily A member 1 [Source:HGNC Symbol;Acc:HGNC:497]	Ion_trans	49	43	0	0	0.216514	0.211434	0	0
ENSG00000179532	508.795	432.183	114.109	57.3913	2.46183	2.13308e-05	0.000161	DNHD1	11	6497260	6593758	+	19629	protein_coding	dynein heavy chain domain 1 [Source:HGNC Symbol;Acc:HGNC:26532]	Dynein_heavy	666	506	82	55	0.956054	0.808304	0.211188	0.106995
ENSG00000149084	2026.01	2037.92	201.779	531.13	2.46929	2.14993e-05	0.000162106	HSD17B12	11	43680558	43856617	+	7838	protein_coding	hydroxysteroid 17-beta dehydrogenase 12 [Source:HGNC Symbol;Acc:HGNC:18646]	adh_short	2652	2386	145	509	9.53399	9.54526	0.935226	2.47977
ENSG00000174371	3147.5	3216.6	460.613	867.13	2.26013	2.1892e-05	0.000165015	EXO1	1	241847967	241895148	+	4140	protein_coding	exonuclease 1 [Source:HGNC Symbol;Acc:HGNC:3511]	XPG_I	4120	3766	331	831	28.0416	28.5235	4.04186	7.66478
ENSG00000198873	307.111	322.856	69.5789	48	2.42635	2.19537e-05	0.000165374	GRK5	10	119207589	119459742	+	7000	protein_coding	G protein-coupled receptor kinase 5 [Source:HGNC Symbol;Acc:HGNC:4544]	Pkinase	402	378	50	46	1.61821	1.69323	0.361098	0.250933
ENSG00000168243	313.222	308.336	70.9705	28.1739	2.65936	2.19681e-05	0.00016543	GNG4	1	235547687	235650754	-	5401	protein_coding	G protein subunit gamma 4 [Source:HGNC Symbol;Acc:HGNC:4407]	-	410	361	51	27	2.13903	2.09583	0.477364	0.190892
novel.470	115.357	114.452	18.0905	9.3913	3.08386	2.22579e-05	0.000167505	-	CHR_HSCHR17_7_CTG4	38152247	38206464	+	8253	-	PF00017:SH2 domain|PF07525:SOCS box	SOCS_box	151	134	13	9	0.515551	0.509115	0.0796316	0.0416418
ENSG00000113638	634.848	650.837	41.7474	151.304	2.72831	2.2345e-05	0.000167916	TTC33	5	40512333	40755975	-	6821	protein_coding	tetratricopeptide repeat domain 33 [Source:HGNC Symbol;Acc:HGNC:29959]	-	831	762	30	145	3.43289	3.50291	0.222345	0.811743
ENSG00000125351	3107.01	2939.01	267.183	784.695	2.52165	2.23461e-05	0.000167916	UPF3B	X	119805311	119852998	-	3081	protein_coding	UPF3B, regulator of nonsense mediated mRNA decay [Source:HGNC Symbol;Acc:HGNC:20439]	-	4067	3441	192	752	37.1954	35.02	3.15038	9.32019
ENSG00000273237	76.3957	84.5575	2.78316	9.3913	3.6776	2.23684e-05	0.000167977	AC004520.1	7	26173533	26174945	-	1413	antisense	-	-	100	99	2	9	1.99418	2.19693	0.0715553	0.24322
ENSG00000170264	458.374	521.865	51.4884	118.956	2.51718	2.2395e-05	0.000168109	FAM161A	2	61824854	61854143	-	5252	protein_coding	family with sequence similarity 161 member A [Source:HGNC Symbol;Acc:HGNC:25808]	-	600	611	37	114	3.21909	3.64787	0.356148	0.828856
ENSG00000170439	390.382	364.708	77.9284	74.0869	2.31303	2.292e-05	0.000171722	METTL7B	12	55681546	55684611	+	1506	protein_coding	methyltransferase like 7B [Source:HGNC Symbol;Acc:HGNC:28276]	Methyltransf_11	511	427	56	71	9.56098	8.89049	1.87982	1.80025
ENSG00000228824	38.1978	35.0188	0	0	7.36787	2.30203e-05	0.000172419	MIR4500HG	13	87427214	87671259	-	3273	lincRNA	MIR4500 host gene [Source:HGNC Symbol;Acc:HGNC:42773]	-	50	41	0	0	0.430458	0.39279	0	0
ENSG00000115226	358.296	362.145	83.4947	28.1739	2.7006	2.33717e-05	0.000174884	FNDC4	2	27491883	27495245	-	1982	protein_coding	fibronectin type III domain containing 4 [Source:HGNC Symbol;Acc:HGNC:20239]	fn3	469	424	60	27	6.66769	6.70787	1.53039	0.520186
ENSG00000166130	1299.49	1291.42	91.8442	320.348	2.64855	2.36311e-05	0.000176657	IKBIP	12	98613405	98645113	-	4163	protein_coding	IKBKB interacting protein [Source:HGNC Symbol;Acc:HGNC:26430]	-	1701	1512	66	307	11.5134	11.3885	0.801477	2.81599
ENSG00000185842	1223.09	1187.22	20.8737	223.304	3.29751	2.37834e-05	0.000177739	DNAH14	1	224896262	225399292	+	19693	protein_coding	dynein axonemal heavy chain 14 [Source:HGNC Symbol;Acc:HGNC:2945]	-	1601	1390	15	214	2.29079	2.21322	0.0385064	0.414955
ENSG00000119771	798.335	842.159	211.52	89.7391	2.44914	2.38608e-05	0.000178261	KLHL29	2	23385217	23708611	+	11071	protein_coding	kelch like family member 29 [Source:HGNC Symbol;Acc:HGNC:29404]	BACK	1045	986	152	86	2.65972	2.79263	0.694081	0.296627
ENSG00000162595	40.4897	32.4564	0	0	7.36279	2.38752e-05	0.000178313	DIRAS3	1	68045896	68051631	-	2039	protein_coding	DIRAS family GTPase 3 [Source:HGNC Symbol;Acc:HGNC:687]	Ras	53	38	0	0	0.732428	0.584371	0	0
ENSG00000205359	35.142	37.5811	0	0	7.35782	2.39326e-05	0.000178685	SLCO6A1	5	102371782	102499016	-	2952	protein_coding	solute carrier organic anion transporter family member 6A1 [Source:HGNC Symbol;Acc:HGNC:23613]	-	46	44	0	0	0.439084	0.467368	0	0
ENSG00000122417	1169.62	1124.87	65.4042	272.348	2.75979	2.42523e-05	0.000181015	ODF2L	1	86346824	86396342	-	10898	protein_coding	outer dense fiber of sperm tails 2 like [Source:HGNC Symbol;Acc:HGNC:29225]	-	1531	1317	47	261	3.95854	3.78932	0.218024	0.914519
ENSG00000163009	87.091	85.4117	11.1326	5.21739	3.42873	2.43818e-05	0.000181809	C2orf48	2	10141382	10211725	+	2502	lincRNA	chromosome 2 open reading frame 48 [Source:HGNC Symbol;Acc:HGNC:26322]	-	114	100	8	5	1.28388	1.25324	0.161643	0.07631
ENSG00000118004	75.6317	81.9952	9.74105	2.08696	3.79554	2.44625e-05	0.000182353	COLEC11	2	3594832	3644644	+	2778	protein_coding	collectin subfamily member 11 [Source:HGNC Symbol;Acc:HGNC:17213]	Lectin_C	99	96	7	2	1.00417	1.08358	0.127385	0.0274914
ENSG00000263142	275.788	242.569	40.3558	53.2174	2.4657	2.44718e-05	0.000182365	LRRC37A17P	17	46978481	47054569	+	5074	transcribed_unprocessed_pseudogene	leucine rich repeat containing 37 member A17, pseudogene [Source:HGNC Symbol;Acc:HGNC:48365]	-	361	284	29	51	2.00476	1.75505	0.288936	0.383812
ENSG00000255328	42.0176	30.7482	0	0	7.35938	2.46494e-05	0.000183398	AC136475.5	11	327171	330122	+	1277	lincRNA	-	-	55	36	0	0	1.21361	0.883963	0	0
ENSG00000168785	591.302	580.799	109.935	139.826	2.22875	2.46636e-05	0.000183446	TSPAN5	4	98470367	98658629	-	7430	protein_coding	tetraspanin 5 [Source:HGNC Symbol;Acc:HGNC:17753]	Tetraspannin	774	680	79	134	2.93534	2.86974	0.537517	0.688676
ENSG00000132485	7249.95	7074.65	187.863	1468.17	3.11179	2.47427e-05	0.000183977	ZRANB2	1	71063291	71081297	-	4993	protein_coding	zinc finger RANBP2-type containing 2 [Source:HGNC Symbol;Acc:HGNC:13058]	zf-RanBP	9490	8283	135	1407	53.5564	52.0174	1.36687	10.7605
ENSG00000069667	319.334	296.378	13.9158	64.6956	2.95323	2.48289e-05	0.00018456	RORA	15	60488284	61229319	-	17040	protein_coding	RAR related orphan receptor A [Source:HGNC Symbol;Acc:HGNC:10258]	zf-C4	418	347	10	62	0.691215	0.638532	0.0296677	0.138938
ENSG00000180801	185.641	177.656	30.6147	29.2174	2.60318	2.49638e-05	0.000185503	ARSJ	4	113900284	113979727	-	5146	protein_coding	arylsulfatase family member J [Source:HGNC Symbol;Acc:HGNC:26286]	Sulfatase	243	208	22	28	1.33059	1.26741	0.216126	0.207772
ENSG00000231365	582.899	613.256	105.76	146.087	2.2455	2.50176e-05	0.000185845	AL359915.2	1	119140396	119275973	+	5462	antisense	-	-	763	718	76	140	3.93622	4.12188	0.703421	0.978758
ENSG00000161551	129.109	144.346	9.74105	24	2.99632	2.54019e-05	0.000188404	ZNF577	19	51804816	51890950	-	7510	protein_coding	zinc finger protein 577 [Source:HGNC Symbol;Acc:HGNC:28673]	KRAB	169	169	7	23	0.634093	0.705618	0.0471207	0.116946
ENSG00000116984	5727.38	5689.27	1167.53	1533.91	2.07912	2.54673e-05	0.000188829	MTR	1	236795281	236903981	+	11374	protein_coding	5-methyltetrahydrofolate-homocysteine methyltransferase [Source:HGNC Symbol;Acc:HGNC:7468]	B12-binding	7497	6661	839	1470	18.5729	18.3632	3.72909	4.93518
ENSG00000196950	3496.63	3538.6	503.752	972.521	2.25185	2.55894e-05	0.000189631	SLC39A10	2	195575977	195737702	+	6917	protein_coding	solute carrier family 39 member 10 [Source:HGNC Symbol;Acc:HGNC:20861]	-	4577	4143	362	932	18.6453	18.781	2.64572	5.14514
ENSG00000005436	1420.2	1517.77	146.116	386.087	2.46221	2.59019e-05	0.00019157	GCFC2	2	75652000	75710989	-	5465	protein_coding	GC-rich sequence DNA-binding factor 2 [Source:HGNC Symbol;Acc:HGNC:1317]	-	1859	1777	105	370	9.58508	10.1958	0.971299	2.5853
ENSG00000169071	250.578	222.07	51.4884	26.0869	2.61789	2.59448e-05	0.000191768	ROR2	9	91563091	91950162	-	5818	protein_coding	receptor tyrosine kinase like orphan receptor 2 [Source:HGNC Symbol;Acc:HGNC:10257]	Pkinase_Tyr	328	260	37	25	1.58857	1.40127	0.321501	0.164084
ENSG00000174842	1143.64	1147.93	36.181	243.13	3.03117	2.61589e-05	0.000192979	GLMN	1	92246402	92298987	-	2910	protein_coding	glomulin, FKBP associated protein [Source:HGNC Symbol;Acc:HGNC:14373]	-	1497	1344	26	233	14.4956	14.482	0.451683	3.05747
ENSG00000128596	522.546	526.136	107.152	117.913	2.21939	2.61659e-05	0.000192979	CCDC136	7	128790757	128822132	+	6188	protein_coding	coiled-coil domain containing 136 [Source:HGNC Symbol;Acc:HGNC:22225]	-	684	616	77	113	3.11467	3.12143	0.629063	0.697312
ENSG00000130035	38.1978	33.3105	0	0	7.33391	2.65105e-05	0.000195398	GALNT8	12	4720341	4851927	+	9208	protein_coding	polypeptide N-acetylgalactosaminyltransferase 8 [Source:HGNC Symbol;Acc:HGNC:4130]	-	50	39	0	0	0.153007	0.132807	0	0
ENSG00000138669	85.5631	69.1834	0	8.34782	4.12082	2.67407e-05	0.000196972	PRKG2	4	81087370	81215117	-	5116	protein_coding	protein kinase, cGMP-dependent, type II [Source:HGNC Symbol;Acc:HGNC:9416]	Pkinase	112	81	0	8	0.61687	0.496452	0	0.0597115
ENSG00000151778	62.6444	64.9129	1.39158	0	6.71713	2.71364e-05	0.000199638	SERP2	13	44373665	44397714	+	1927	protein_coding	stress associated endoplasmic reticulum protein family member 2 [Source:HGNC Symbol;Acc:HGNC:20607]	-	82	76	1	0	1.19905	1.23667	0.0262345	0
ENSG00000279501	39.7257	31.6023	0	0	7.33044	2.72241e-05	0.00020022	CR392039.3	21	8996496	9018670	-	227	lincRNA	-	-	52	37	0	0	6.45482	5.11091	0	0
ENSG00000074935	561.508	583.362	54.2716	142.956	2.53092	2.72968e-05	0.000200692	TUBE1	6	112070777	112087529	-	6973	protein_coding	tubulin epsilon 1 [Source:HGNC Symbol;Acc:HGNC:20775]	Tubulin	735	683	39	137	2.97012	3.07131	0.282747	0.750239
ENSG00000265717	35.142	35.8729	0	0	7.32362	2.74283e-05	0.000201533	AC103808.3	18	76254292	76255214	-	598	lincRNA	-	-	46	42	0	0	2.16752	2.20227	0	0
ENSG00000205758	792.223	861.804	115.501	217.043	2.31126	2.76053e-05	0.000202708	CRYZL1	21	33589341	33643926	-	6177	protein_coding	crystallin zeta like 1 [Source:HGNC Symbol;Acc:HGNC:2420]	-	1037	1009	83	208	4.73051	5.12196	0.679288	1.28583
ENSG00000083535	902.233	949.778	16.6989	175.304	3.26266	2.77755e-05	0.000203705	PIBF1	13	72782059	73016461	+	4253	protein_coding	progesterone immunomodulatory binding factor 1 [Source:HGNC Symbol;Acc:HGNC:23352]	-	1181	1112	12	168	7.82458	8.19845	0.142639	1.50839
ENSG00000048052	99.3143	117.014	4.17474	16.6956	3.33474	2.79222e-05	0.000204653	HDAC9	7	18086949	19002416	+	16827	protein_coding	histone deacetylase 9 [Source:HGNC Symbol;Acc:HGNC:14065]	-	130	137	3	16	0.217692	0.255292	0.00901298	0.0363088
ENSG00000224189	288.776	220.362	36.181	53.2174	2.50415	2.79634e-05	0.000204828	HAGLR	2	176164051	176188958	-	5110	antisense	HOXD antisense growth-associated long non-coding RNA [Source:HGNC Symbol;Acc:HGNC:43755]	-	378	258	26	51	2.08438	1.58315	0.257221	0.381108
ENSG00000113594	1178.78	1084.73	101.585	293.217	2.51589	2.87827e-05	0.000210633	LIFR	5	38474963	38608354	-	11864	protein_coding	LIF receptor alpha [Source:HGNC Symbol;Acc:HGNC:6597]	fn3	1543	1270	73	281	3.66472	3.35657	0.311061	0.904428
ENSG00000164118	776.944	751.623	27.8316	166.956	2.96482	2.92216e-05	0.000213508	CEP44	4	174283677	174333380	+	7132	protein_coding	centrosomal protein 44 [Source:HGNC Symbol;Acc:HGNC:29356]	-	1017	880	20	160	4.01806	3.86896	0.141766	0.856658
ENSG00000156384	326.209	357.021	30.6147	80.3478	2.61208	2.92298e-05	0.000213508	SFR1	10	104122058	104126385	+	1812	protein_coding	SWI5 dependent homologous recombination repair protein 1 [Source:HGNC Symbol;Acc:HGNC:29574]	-	427	418	22	77	6.64012	7.23337	0.613788	1.62267
ENSG00000139985	73.3398	52.9552	0	1.04348	6.72994	2.92565e-05	0.000213636	ADAM21	14	70452157	70459899	+	2658	protein_coding	ADAM metallopeptidase domain 21 [Source:HGNC Symbol;Acc:HGNC:200]	-	96	62	0	1	1.01771	0.731407	0	0.0143663
ENSG00000104154	285.72	286.129	22.2653	64.6956	2.70419	2.94525e-05	0.000214869	SLC30A4	15	45479611	45522807	-	8073	protein_coding	solute carrier family 30 member 4 [Source:HGNC Symbol;Acc:HGNC:11015]	-	374	335	16	62	1.3054	1.30117	0.100193	0.293262
ENSG00000101282	35.906	34.1647	0	0	7.30444	2.96515e-05	0.000216187	RSPO4	20	958452	1002264	-	2710	protein_coding	R-spondin 4 [Source:HGNC Symbol;Acc:HGNC:16175]	-	47	40	0	0	0.488692	0.462821	0	0
ENSG00000120253	3532.53	3474.55	555.24	980.869	2.18885	2.96873e-05	0.000216381	NUP43	6	149724315	149749665	-	4432	protein_coding	nucleoporin 43 [Source:HGNC Symbol;Acc:HGNC:21182]	-	4624	4068	399	940	29.3985	28.7809	4.55121	8.09892
ENSG00000108582	3646.36	3825.59	446.697	1035.13	2.33321	3.01827e-05	0.000219517	CPD	17	30378905	30469989	+	12532	protein_coding	carboxypeptidase D [Source:HGNC Symbol;Acc:HGNC:2301]	-	4773	4479	321	992	10.7319	11.2068	1.29491	3.02267
ENSG00000007314	64.9363	58.934	5.56632	0	4.60118	3.10981e-05	0.000225758	SCN4A	17	63938554	63972918	-	8243	protein_coding	sodium voltage-gated channel alpha subunit 4 [Source:HGNC Symbol;Acc:HGNC:10591]	Ion_trans	85	69	4	0	0.290563	0.262474	0.0245317	0
novel.15	34.378	35.0188	0	0	7.29037	3.13378e-05	0.000227428	-	1	241357271	241361586	+	519	-	-	-	45	41	0	0	2.44316	2.47707	0	0
ENSG00000169621	78.6875	94.8069	4.17474	11.4783	3.43394	3.13779e-05	0.000227649	APLF	2	68467561	68655862	+	7135	protein_coding	aprataxin and PNKP like factor [Source:HGNC Symbol;Acc:HGNC:28724]	-	103	111	3	11	0.406771	0.487811	0.021256	0.0588705
ENSG00000170961	45.0734	25.6235	0	0	7.3182	3.147e-05	0.000228217	HAS2	8	121612116	121641390	-	4190	protein_coding	hyaluronan synthase 2 [Source:HGNC Symbol;Acc:HGNC:4819]	-	59	30	0	0	0.396775	0.224507	0	0
ENSG00000171885	39.7257	29.8941	0	0	7.29557	3.16244e-05	0.000229226	AQP4	18	26852038	26865818	-	5995	protein_coding	aquaporin 4 [Source:HGNC Symbol;Acc:HGNC:637]	-	52	35	0	0	0.244411	0.183063	0	0
ENSG00000182287	3128.4	3210.62	80.7116	658.435	3.09835	3.16498e-05	0.000229313	AP1S2	X	15825806	15854931	-	5371	protein_coding	adaptor related protein complex 1 sigma 2 subunit [Source:HGNC Symbol;Acc:HGNC:560]	-	4095	3759	58	631	21.4835	21.9452	0.545917	4.48614
ENSG00000215883	949.598	972.839	226.827	221.217	2.10133	3.21754e-05	0.000232791	CYB5RL	1	54169651	54200036	-	8926	protein_coding	cytochrome b5 reductase like [Source:HGNC Symbol;Acc:HGNC:32220]	NAD_binding_1	1243	1139	163	212	3.92392	4.00119	0.923176	0.906938
ENSG00000166002	216.2	242.569	47.3137	35.4783	2.47485	3.23263e-05	0.000233811	SMCO4	11	93478472	93543508	-	1223	protein_coding	single-pass membrane protein with coiled-coil domains 4 [Source:HGNC Symbol;Acc:HGNC:24810]	-	283	284	34	34	6.52028	7.28139	1.40542	1.06158
ENSG00000258365	55.0049	53.8093	1.39158	3.13043	4.5399	3.27079e-05	0.000236209	AC073655.2	12	94277758	94282844	-	1116	antisense	-	-	72	63	1	3	1.81792	1.7701	0.0452991	0.102649
ENSG00000124212	64.1723	58.934	1.39158	0	6.66576	3.28109e-05	0.000236808	PTGIS	20	49503874	49568146	-	5579	protein_coding	prostaglandin I2 synthase [Source:HGNC Symbol;Acc:HGNC:9603]	p450	84	69	1	0	0.424257	0.387807	0.00906144	0
ENSG00000139445	85.5631	70.8917	9.74105	4.17391	3.52594	3.36188e-05	0.000241752	FOXN4	12	109277979	109309220	-	3471	protein_coding	forkhead box N4 [Source:HGNC Symbol;Acc:HGNC:21399]	Fork_head	112	83	7	4	0.909222	0.749801	0.101952	0.0440052
ENSG00000250722	204.74	179.364	2.78316	33.3913	3.37602	3.36782e-05	0.000242032	SELENOP	5	42799880	42887392	-	5688	protein_coding	selenoprotein P [Source:HGNC Symbol;Acc:HGNC:10751]	-	268	210	2	32	1.32764	1.15766	0.0177756	0.214827
ENSG00000171790	67.2282	80.287	8.34947	4.17391	3.58824	3.36893e-05	0.000242038	SLFNL1	1	41015597	41023237	-	4310	protein_coding	schlafen like 1 [Source:HGNC Symbol;Acc:HGNC:26313]	AAA_4	88	94	6	4	0.575323	0.683869	0.0703765	0.035439
ENSG00000176406	85.5631	79.4328	8.34947	8.34782	3.30487	3.39537e-05	0.000243789	RIMS2	8	103500748	104256094	+	13619	protein_coding	regulating synaptic membrane exocytosis 2 [Source:HGNC Symbol;Acc:HGNC:17283]	C2	112	93	6	8	0.231728	0.214122	0.022272	0.0224307
ENSG00000003137	346.072	319.44	80.7116	36.5217	2.51388	3.42187e-05	0.000245597	CYP26B1	2	72129238	72148038	-	5015	protein_coding	cytochrome P450 family 26 subfamily B member 1 [Source:HGNC Symbol;Acc:HGNC:20581]	p450	453	374	58	35	2.54527	2.33842	0.58467	0.266499
ENSG00000157833	637.14	633.754	165.598	65.7391	2.46317	3.43656e-05	0.000246447	GAREM2	2	26173091	26189663	+	5939	protein_coding	GRB2 associated regulator of MAPK1 subtype 2 [Source:HGNC Symbol;Acc:HGNC:27172]	-	834	742	119	63	3.95694	3.91754	1.01295	0.405066
ENSG00000163291	1904.54	1852.58	136.375	485.217	2.59321	3.44646e-05	0.000247082	PAQR3	4	78887127	78939438	-	12403	protein_coding	progestin and adipoQ receptor family member 3 [Source:HGNC Symbol;Acc:HGNC:30130]	-	2493	2169	98	465	5.66372	5.48347	0.399441	1.43161
ENSG00000258768	65.7003	71.7458	1.39158	7.30435	3.91662	3.45397e-05	0.000247545	AL356019.2	14	20260480	20264308	-	3829	lincRNA	-	-	86	84	1	7	0.632877	0.687886	0.0132029	0.069809
ENSG00000258881	63.4084	48.6846	4.17474	1.04348	4.50258	3.51785e-05	0.000251817	AC007040.2	2	70939318	70995336	-	4451	protein_coding	-	-	83	57	3	1	0.525445	0.40155	0.0340735	0.00857909
ENSG00000247796	284.192	289.546	36.181	66.7826	2.47033	3.52053e-05	0.000251933	AC008966.1	5	53109842	53115126	+	3194	antisense	-	-	372	339	26	64	3.28182	3.32803	0.411521	0.765145
ENSG00000205611	29.7943	38.4352	0	0	7.26545	3.53853e-05	0.000253145	LINC01597	20	30278906	30288479	-	4472	lincRNA	long intergenic non-protein coding RNA 1597 [Source:HGNC Symbol;Acc:HGNC:51594]	-	39	45	0	0	0.245736	0.315525	0	0
ENSG00000117174	2284.99	2255.72	395.208	635.478	2.13844	3.54491e-05	0.000253486	ZNHIT6	1	85649423	85708433	-	6197	protein_coding	zinc finger HIT-type containing 6 [Source:HGNC Symbol;Acc:HGNC:26089]	-	2991	2641	284	609	13.6001	13.3632	2.31681	3.75262
ENSG00000120729	29.0303	39.2894	0	0	7.26726	3.54545e-05	0.000253486	MYOT	5	137867791	137887851	+	2893	protein_coding	myotilin [Source:HGNC Symbol;Acc:HGNC:12399]	I-set	38	46	0	0	0.370119	0.498577	0	0
ENSG00000101695	587.483	538.093	33.3979	134.609	2.73586	3.55142e-05	0.000253834	RNF125	18	32018372	32073213	+	6508	protein_coding	ring finger protein 125 [Source:HGNC Symbol;Acc:HGNC:21150]	-	769	630	24	129	3.32955	3.0354	0.186431	0.756904
ENSG00000144596	113.83	96.5152	16.6989	8.34782	3.09202	3.56886e-05	0.000254928	GRIP2	3	14489111	14556075	-	11885	protein_coding	glutamate receptor interacting protein 2 [Source:HGNC Symbol;Acc:HGNC:23841]	PDZ	149	113	12	8	0.353259	0.298127	0.051043	0.0257033
ENSG00000134758	3854.16	4006.66	197.604	957.913	2.76481	3.59019e-05	0.000256238	RNF138	18	32091855	32131561	+	3795	protein_coding	ring finger protein 138 [Source:HGNC Symbol;Acc:HGNC:17765]	-	5045	4691	142	918	37.459	38.7593	1.8916	9.23697
ENSG00000144891	67.9921	52.9552	0	1.04348	6.66755	3.60464e-05	0.000257095	AGTR1	3	148697784	148743008	+	3478	protein_coding	angiotensin II receptor type 1 [Source:HGNC Symbol;Acc:HGNC:336]	7tm_1	89	62	0	1	0.721052	0.558965	0	0.0109792
ENSG00000108961	61.8805	58.0799	5.56632	1.04348	4.26244	3.61769e-05	0.000257948	RANGRF	17	8288497	8290092	+	1577	protein_coding	RAN guanine nucleotide release factor [Source:HGNC Symbol;Acc:HGNC:17679]	-	81	68	4	1	1.4473	1.35207	0.128228	0.024214
ENSG00000213740	1237.61	1258.97	218.478	341.217	2.15575	3.65111e-05	0.000260173	SERBP1P1	X	68783472	68785066	+	1160	processed_pseudogene	SERPINE1 mRNA binding protein 1 pseudogene 1 [Source:HGNC Symbol;Acc:HGNC:32247]	-	1620	1474	157	327	39.3517	39.8439	6.84219	10.7644
ENSG00000227097	9018.51	9120.26	2307.24	546.782	2.66854	3.6673e-05	0.000261169	RPS28P7	11	82689559	82689768	+	210	processed_pseudogene	ribosomal protein S28 pseudogene 7 [Source:HGNC Symbol;Acc:HGNC:35787]	-	11805	10678	1658	524	1583.99	1594.39	399.134	95.282
ENSG00000280355	73.3398	68.3293	4.17474	7.30435	3.60059	3.68962e-05	0.0002626	AL132656.4	10	79681973	79684094	-	2122	TEC	-	-	96	80	3	7	1.27477	1.18214	0.071471	0.125965
ENSG00000115363	35.906	31.6023	0	0	7.25085	3.69163e-05	0.000262664	EVA1A	2	75469302	75569722	-	2744	protein_coding	eva-1 homolog A, regulator of programmed cell death [Source:HGNC Symbol;Acc:HGNC:25816]	-	47	37	0	0	0.482637	0.422805	0	0
ENSG00000162769	1391.16	1405.02	346.503	327.652	2.05248	3.72161e-05	0.000264564	FLVCR1	1	212858255	212899363	+	6442	protein_coding	feline leukemia virus subgroup C cellular receptor 1 [Source:HGNC Symbol;Acc:HGNC:24682]	MFS_1	1821	1645	249	314	7.96518	8.00696	1.95403	1.86126
ENSG00000174501	268.913	204.134	33.3979	50.0869	2.4963	3.72246e-05	0.000264564	ANKRD36C	2	95836919	95991831	-	8574	protein_coding	ankyrin repeat domain 36C [Source:HGNC Symbol;Acc:HGNC:32946]	-	352	239	24	48	1.15682	0.874051	0.141508	0.213775
ENSG00000043355	2359.86	2401.78	665.175	444.522	2.102	3.72281e-05	0.000264564	ZIC2	13	99981772	99986773	+	3310	protein_coding	Zic family member 2 [Source:HGNC Symbol;Acc:HGNC:12873]	-	3089	2812	478	426	26.2964	26.6385	7.30052	4.91451
ENSG00000122574	49.6572	57.2258	2.78316	2.08696	4.47411	3.72687e-05	0.000264693	WIPF3	7	29806486	29917066	+	6065	protein_coding	WAS/WASL interacting protein family member 3 [Source:HGNC Symbol;Acc:HGNC:22004]	-	65	67	2	2	0.301988	0.346391	0.0166707	0.0125921
ENSG00000239697	36.6699	30.7482	0	0	7.24901	3.73853e-05	0.000265441	TNFSF12	17	7548891	7557890	+	1879	protein_coding	TNF superfamily member 12 [Source:HGNC Symbol;Acc:HGNC:11927]	-	48	36	0	0	0.719815	0.600756	0	0
ENSG00000157036	850.284	934.403	97.4105	238.956	2.40378	3.74134e-05	0.000265561	EXOG	3	38496127	38542161	+	5223	protein_coding	exo/endonuclease G [Source:HGNC Symbol;Acc:HGNC:3347]	-	1113	1094	70	229	6.00457	6.5678	0.677535	1.67423
ENSG00000177301	65.7003	42.7058	2.78316	0	5.44478	3.77479e-05	0.000267613	KCNA2	1	110519837	110631474	-	17379	protein_coding	potassium voltage-gated channel subfamily A member 2 [Source:HGNC Symbol;Acc:HGNC:6220]	-	86	50	2	0	0.139438	0.0902127	0.0058178	0
ENSG00000256340	65.7003	58.0799	2.78316	5.21739	3.91983	3.78601e-05	0.000268328	ABCC6P1	16	18571162	18598328	+	3431	transcribed_unprocessed_pseudogene	ATP binding cassette subfamily C member 6 pseudogene 1 [Source:HGNC Symbol;Acc:HGNC:33352]	-	86	68	2	5	0.706292	0.621457	0.0294688	0.0556478
ENSG00000272798	30.5583	36.727	0	0	7.24547	3.79023e-05	0.000268547	AL008721.1	22	25436312	25436915	+	604	lincRNA	-	-	40	43	0	0	1.86608	2.23231	0	0
ENSG00000274253	46.6013	56.3717	1.39158	1.04348	5.42431	3.81159e-05	0.000269979	AC138649.1	15	22757857	22778741	+	1640	sense_overlapping	-	-	61	66	1	1	1.04808	1.26189	0.0308255	0.0232839
ENSG00000164778	1747.93	1959.34	459.221	444.522	2.03643	3.86438e-05	0.000273417	EN2	7	155458129	155464831	+	3395	protein_coding	engrailed homeobox 2 [Source:HGNC Symbol;Acc:HGNC:3343]	Homeobox	2288	2294	330	426	18.9899	21.1873	4.91392	4.79147
ENSG00000142864	39534.8	39828.3	4443.31	11267.5	2.33662	3.86476e-05	0.000273417	SERBP1	1	67407810	67430415	-	7676	protein_coding	SERPINE1 mRNA binding protein 1 [Source:HGNC Symbol;Acc:HGNC:17860]	-	51750	46631	3193	10798	189.969	190.486	21.029	53.7164
ENSG00000010072	2034.42	1961.05	384.076	553.043	2.09129	3.88229e-05	0.000274575	SPRTN	1	231337104	231355023	+	5906	protein_coding	SprT-like N-terminal domain [Source:HGNC Symbol;Acc:HGNC:25356]	-	2663	2296	276	530	12.7053	12.1899	2.36249	3.42674
ENSG00000118496	1328.52	1361.46	178.122	374.609	2.28079	3.94606e-05	0.000278603	FBXO30	6	145793502	145814753	-	9009	protein_coding	F-box protein 30 [Source:HGNC Symbol;Acc:HGNC:15600]	-	1739	1594	128	359	5.43913	5.54797	0.718269	1.52166
ENSG00000100473	921.332	917.321	214.303	220.174	2.08117	3.95507e-05	0.000279137	COCH	14	30874514	30895065	+	4031	protein_coding	cochlin [Source:HGNC Symbol;Acc:HGNC:2180]	VWA	1206	1074	154	211	8.43026	8.35438	1.93135	1.9988
ENSG00000133731	975.572	1048	68.1874	256.696	2.63445	3.95989e-05	0.000279394	IMPA1	8	81657961	81686693	-	3720	protein_coding	inositol monophosphatase 1 [Source:HGNC Symbol;Acc:HGNC:6050]	-	1277	1227	49	246	9.67285	10.3425	0.665897	2.52517
ENSG00000269964	36.6699	29.8941	0	0	7.23067	4.03596e-05	0.000284505	MEI4	6	77690658	77926974	+	4800	protein_coding	meiotic double-stranded break formation protein 4 [Source:HGNC Symbol;Acc:HGNC:43638]	-	48	35	0	0	0.281778	0.228639	0	0
ENSG00000162676	359.06	368.124	87.6695	60.5217	2.29879	4.04668e-05	0.000285176	GFI1	1	92474762	92486876	-	3301	protein_coding	growth factor independent 1 transcriptional repressor [Source:HGNC Symbol;Acc:HGNC:4237]	-	470	431	63	58	4.01198	4.09406	0.964825	0.670936
ENSG00000162623	1284.97	1402.46	108.543	354.783	2.53302	4.05424e-05	0.000285368	TYW3	1	74733152	74766678	+	4616	protein_coding	tRNA-yW synthesizing protein 3 homolog [Source:HGNC Symbol;Acc:HGNC:24757]	-	1682	1642	78	340	10.2675	11.154	0.854245	2.81263
ENSG00000106392	789.931	791.766	26.44	175.304	2.96375	4.09048e-05	0.000287747	C1GALT1	7	7156934	7248651	+	7805	protein_coding	core 1 synthase, glycoprotein-N-acetylgalactosamine 3-beta-galactosyltransferase 1 [Source:HGNC Symbol;Acc:HGNC:24337]	-	1034	927	19	168	3.73297	3.72417	0.123065	0.821931
ENSG00000205662	37.4339	29.04	0	0	7.22881	4.09839e-05	0.00028796	FAM239C	X	3929869	3937855	-	2118	lincRNA	family with sequence similarity 239 member C (non-protein coding) [Source:HGNC Symbol;Acc:HGNC:53416]	-	49	34	0	0	0.651893	0.503356	0	0
ENSG00000158865	37.4339	29.04	0	0	7.22881	4.09839e-05	0.00028796	SLC5A11	16	24845841	24911628	+	3415	protein_coding	solute carrier family 5 member 11 [Source:HGNC Symbol;Acc:HGNC:23091]	-	49	34	0	0	0.404307	0.312184	0	0
ENSG00000154721	70.284	82.8493	9.74105	4.17391	3.49427	4.16375e-05	0.000292466	JAM2	21	25639272	25717562	+	5933	protein_coding	junctional adhesion molecule 2 [Source:HGNC Symbol;Acc:HGNC:14686]	V-set	92	97	7	4	0.436938	0.512649	0.0596455	0.0257445
ENSG00000275765	78.6875	88.8281	8.34947	9.3913	3.2344	4.16616e-05	0.000292548	AC091982.3	5	151770242	151771508	-	726	lincRNA	-	-	103	104	6	9	3.99767	4.49179	0.4178	0.473374
ENSG00000154537	38.1978	28.1858	0	0	7.22695	4.16889e-05	0.000292653	FAM27C	9	61854162	61855331	+	616	lincRNA	family with sequence similarity 27 member C [Source:HGNC Symbol;Acc:HGNC:23668]	-	50	33	0	0	2.28716	1.67979	0	0
novel.23	51.949	52.1011	0	2.08696	5.49139	4.18176e-05	0.000293469	-	1	229121843	229140706	-	1333	-	-	-	68	61	0	2	1.43742	1.4349	0	0.0572926
ENSG00000111450	1510.34	1554.49	176.731	426.782	2.34218	4.1914e-05	0.000294058	STX2	12	130789600	130839266	-	3723	protein_coding	syntaxin 2 [Source:HGNC Symbol;Acc:HGNC:3403]	SNARE	1977	1820	127	409	14.963	15.3285	1.7245	4.19497
ENSG00000253508	34.378	31.6023	0	0	7.21774	4.19575e-05	0.000294188	AC004080.2	7	27186573	27193448	-	556	lincRNA	-	-	45	37	0	0	2.28057	2.08665	0	0
ENSG00000255389	87.855	54.6635	8.34947	2.08696	3.82919	4.22599e-05	0.000296045	Z97989.1	6	111599875	111602295	+	2421	antisense	-	-	115	64	6	2	1.33847	0.828911	0.125288	0.0315453
ENSG00000143476	3120	3141.44	338.154	880.695	2.35983	4.26978e-05	0.000298758	DTL	1	212035553	212107400	+	4916	protein_coding	denticleless E3 ubiquitin protein ligase homolog [Source:HGNC Symbol;Acc:HGNC:30288]	-	4084	3678	243	844	23.4089	23.4597	2.4989	6.55586
ENSG00000282933	50.4211	66.6211	4.17474	3.13043	4.0174	4.28671e-05	0.000299676	RHOXF1P3	X	119942834	119992810	+	2669	transcribed_unprocessed_pseudogene	Rhox homeobox family member 1 pseudogene 3 [Source:HGNC Symbol;Acc:HGNC:51612]	-	66	78	3	3	0.69679	0.916365	0.0568233	0.0429212
ENSG00000224786	66.4642	50.3929	0	1.04348	6.61816	4.33335e-05	0.000302579	CETN4P	4	122728532	122732482	-	3858	transcribed_unitary_pseudogene	centrin 4, pseudogene [Source:HGNC Symbol;Acc:HGNC:35450]	-	87	59	0	1	0.635424	0.479526	0	0.00989775
ENSG00000135776	3188.75	3338.74	577.505	939.13	2.10504	4.44541e-05	0.000309853	ABCB10	1	229516582	229558695	-	4256	protein_coding	ATP binding cassette subfamily B member 10 [Source:HGNC Symbol;Acc:HGNC:41]	ABC_membrane	4174	3909	415	900	27.6349	28.7996	4.92947	8.07495
ENSG00000165995	161.959	163.136	25.0484	29.2174	2.57939	4.48035e-05	0.000312105	CACNB2	10	18140677	18543557	+	8955	protein_coding	calcium voltage-gated channel auxiliary subunit beta 2 [Source:HGNC Symbol;Acc:HGNC:1402]	-	212	191	18	28	0.667078	0.668791	0.101616	0.119396
ENSG00000069188	1024.47	957.465	258.834	73.0435	2.58253	4.56898e-05	0.000317435	SDK2	17	73334384	73644089	-	11607	protein_coding	sidekick cell adhesion molecule 2 [Source:HGNC Symbol;Acc:HGNC:19308]	fn3	1341	1121	186	70	3.25548	3.02836	0.810115	0.230291
ENSG00000117505	3898.47	3993.85	553.848	1145.74	2.21454	4.57427e-05	0.00031771	DR1	1	93345888	93369498	+	10949	protein_coding	down-regulator of transcription 1 [Source:HGNC Symbol;Acc:HGNC:3017]	-	5103	4676	398	1098	13.1328	13.3913	1.83765	3.82936
ENSG00000146426	305.583	310.044	36.181	75.1304	2.45896	4.58339e-05	0.000318249	TIAM2	6	154832697	155257723	+	11532	protein_coding	T cell lymphoma invasion and metastasis 2 [Source:HGNC Symbol;Acc:HGNC:11806]	RhoGEF	400	363	26	72	0.977376	0.987017	0.113978	0.238411
ENSG00000021645	51.949	63.2046	0	1.04348	6.5962	4.61492e-05	0.000320344	NRXN3	14	78170373	79868290	+	15535	protein_coding	neurexin 3 [Source:HGNC Symbol;Acc:HGNC:8010]	Laminin_G_2	68	74	0	1	0.12334	0.149363	0	0.00245803
ENSG00000279511	57.2967	57.2258	0	1.04348	6.58857	4.67316e-05	0.000323854	AL356274.2	13	37142967	37146718	-	3752	TEC	-	-	75	67	0	1	0.563255	0.559931	0	0.0101774
ENSG00000111801	102.37	99.0775	8.34947	15.6522	3.0495	4.67372e-05	0.000323854	BTN3A3	6	26440472	26453415	+	5658	protein_coding	butyrophilin subfamily 3 member A3 [Source:HGNC Symbol;Acc:HGNC:1140]	SPRY	134	116	6	15	0.667342	0.642862	0.0536095	0.101234
ENSG00000171126	224.603	261.36	45.9221	48	2.3705	4.68859e-05	0.000324694	KCNG3	2	42442017	42494097	-	3824	protein_coding	potassium voltage-gated channel modifier subfamily G member 3 [Source:HGNC Symbol;Acc:HGNC:18306]	Ion_trans	294	306	33	46	2.16639	2.50915	0.436264	0.459345
novel.503	30.5583	34.1647	0	0	7.18959	4.69446e-05	0.000325006	-	CHR_HSCHR1_3_CTG32_1	243563342	243856897	-	4047	-	PF00169:PH domain|PF00069:Protein kinase domain	Pkinase	40	40	0	0	0.278505	0.30992	0	0
ENSG00000270030	31.3222	33.3105	0	0	7.18768	4.717e-05	0.00032647	AC136475.7	11	325703	326294	-	592	lincRNA	-	-	41	39	0	0	1.9515	2.06569	0	0
ENSG00000162607	9280.54	9480.69	429.998	2305.04	2.77756	4.72647e-05	0.000326934	USP1	1	62436297	62451804	+	4263	protein_coding	ubiquitin specific peptidase 1 [Source:HGNC Symbol;Acc:HGNC:12607]	UCH	12148	11100	309	2209	80.2964	81.6451	3.66435	19.787
ENSG00000173409	1042.8	1014.69	155.857	288	2.21039	4.75915e-05	0.000328809	ARV1	1	230978981	231000595	+	1987	protein_coding	ARV1 homolog, fatty acid homeostasis modulator [Source:HGNC Symbol;Acc:HGNC:29561]	-	1365	1188	112	276	19.3571	18.7474	2.84953	5.30408
ENSG00000112139	310.166	281.004	69.5789	18.7826	2.75634	4.77346e-05	0.000329701	MDGA1	6	37630679	37699306	-	14187	protein_coding	MAM domain containing glycosylphosphatidylinositol anchor 1 [Source:HGNC Symbol;Acc:HGNC:19267]	-	406	329	50	18	0.806384	0.727157	0.178169	0.0484485
ENSG00000100167	1230.73	1199.18	318.672	270.261	2.0453	4.80273e-05	0.000331529	2023-09-03	22	41969475	41998221	+	7153	protein_coding	septin 3 [Source:HGNC Symbol;Acc:HGNC:10750]	GTP_CDC	1611	1404	229	259	6.3462	6.15462	1.61846	1.38264
ENSG00000166349	67.9921	46.9764	0	1.04348	6.59498	4.82132e-05	0.000332715	RAG1	11	36510709	36593156	+	7815	protein_coding	recombination activating 1 [Source:HGNC Symbol;Acc:HGNC:9831]	zf-C3HC4	89	55	0	1	0.320898	0.220677	0	0.00488618
ENSG00000132763	1097.04	1097.54	301.973	209.739	2.1019	4.83102e-05	0.00033321	MMACHC	1	45500053	45513382	+	5296	protein_coding	methylmalonic aciduria (cobalamin deficiency) cblC type, with homocystinuria [Source:HGNC Symbol;Acc:HGNC:24525]	-	1436	1285	217	201	7.64034	7.60813	2.07141	1.44926
ENSG00000119285	6448.56	6494.7	801.549	1880.35	2.27037	4.83131e-05	0.00033321	HEATR1	1	236549005	236604504	-	9049	protein_coding	HEAT repeat containing 1 [Source:HGNC Symbol;Acc:HGNC:25517]	-	8441	7604	576	1802	26.2845	26.349	3.21792	7.60419
ENSG00000260548	33.6141	30.7482	0	0	7.18193	4.83471e-05	0.000333347	AL035425.2	X	108722070	108732687	-	563	protein_coding	-	-	44	36	0	0	2.20217	2.00501	0	0
ENSG00000056277	839.588	803.724	61.2295	213.913	2.57324	4.84459e-05	0.000333795	ZNF280C	X	130202711	130268899	-	4634	protein_coding	zinc finger protein 280C [Source:HGNC Symbol;Acc:HGNC:25955]	-	1099	941	44	205	6.68264	6.36731	0.48001	1.68926
ENSG00000163491	51.1851	57.2258	2.78316	3.13043	4.18915	4.85467e-05	0.000334332	NEK10	3	27110085	27369460	-	9582	protein_coding	NIMA related kinase 10 [Source:HGNC Symbol;Acc:HGNC:18592]	Pkinase	67	67	2	3	0.197027	0.219251	0.0105518	0.0119554
novel.14	93.9667	79.4328	2.78316	12.5217	3.45501	4.88359e-05	0.000336128	-	1	231359119	231361758	+	2640	-	-	-	123	93	2	12	1.31283	1.10459	0.0382983	0.173571
ENSG00000213516	2058.86	2059.27	232.394	584.348	2.33238	4.88896e-05	0.000336399	RBMXL1	1	88979456	88992960	-	5087	protein_coding	RNA binding motif protein, X-linked like 1 [Source:HGNC Symbol;Acc:HGNC:25073]	RRM_1	2695	2411	167	560	14.9281	14.8613	1.65962	4.20364
ENSG00000081377	1822.04	1861.97	318.672	528	2.12029	4.92898e-05	0.000338955	CDC14B	9	96490241	96619830	-	10462	protein_coding	cell division cycle 14B [Source:HGNC Symbol;Acc:HGNC:1719]	DSPc	2385	2180	229	506	6.42362	6.53378	1.10656	1.84686
ENSG00000198721	1075.65	1042.02	107.152	291.13	2.40724	4.95903e-05	0.000340724	ECI2	6	4115689	4135597	-	4579	protein_coding	enoyl-CoA delta isomerase 2 [Source:HGNC Symbol;Acc:HGNC:14601]	ECH	1408	1220	77	279	8.6644	8.35433	0.850107	2.32666
ENSG00000174599	147.444	139.221	9.74105	28.1739	2.89561	4.97148e-05	0.00034148	TRAM1L1	4	117083554	117085576	-	2023	protein_coding	translocation associated membrane protein 1 like 1 [Source:HGNC Symbol;Acc:HGNC:28371]	LAG1	193	163	7	27	2.68824	2.52647	0.174927	0.509644
ENSG00000010219	324.682	307.482	70.9705	60.5217	2.26728	4.97492e-05	0.000341617	DYRK4	12	4562204	4615302	+	7054	protein_coding	dual specificity tyrosine phosphorylation regulated kinase 4 [Source:HGNC Symbol;Acc:HGNC:3095]	Pkinase	425	360	51	58	1.6977	1.60026	0.365501	0.313972
ENSG00000182533	38.9618	25.6235	0	0	7.18754	5.01297e-05	0.00034393	CAV3	3	8733800	8841808	+	1956	protein_coding	caveolin 3 [Source:HGNC Symbol;Acc:HGNC:1529]	-	51	30	0	0	0.734696	0.480922	0	0
ENSG00000165588	29.0303	35.0188	0	0	7.17435	5.02174e-05	0.000344331	OTX2	14	56799905	56810479	-	3272	protein_coding	orthodenticle homeobox 2 [Source:HGNC Symbol;Acc:HGNC:8522]	TF_Otx	38	41	0	0	0.327248	0.39291	0	0
ENSG00000182397	31.3222	32.4564	0	0	7.16854	5.08252e-05	0.000348195	DNM1P46	15	99790156	99806927	-	3979	transcribed_unprocessed_pseudogene	dynamin 1 pseudogene 46 [Source:HGNC Symbol;Acc:HGNC:35199]	-	41	38	0	0	0.290346	0.299455	0	0
ENSG00000135299	460.666	461.223	94.6274	110.609	2.16597	5.10902e-05	0.00034991	ANKRD6	6	89433170	89633834	+	8329	protein_coding	ankyrin repeat domain 6 [Source:HGNC Symbol;Acc:HGNC:17280]	-	603	540	68	106	2.04	2.03293	0.412734	0.485973
ENSG00000232931	238.354	198.155	16.6989	49.0435	2.71535	5.12786e-05	0.000351098	LINC00342	2	95807118	95816215	-	2618	lincRNA	long intergenic non-protein coding RNA 342 [Source:HGNC Symbol;Acc:HGNC:42470]	-	312	232	12	47	3.35808	2.7787	0.231721	0.685531
ENSG00000113328	6361.47	6496.41	638.735	1829.22	2.38067	5.14094e-05	0.000351891	CCNG1	5	163437569	163446151	+	3096	protein_coding	cyclin G1 [Source:HGNC Symbol;Acc:HGNC:1592]	-	8327	7606	459	1753	75.7869	77.0332	7.49489	21.6212
ENSG00000259363	55.0049	53.8093	0	4.17391	4.58386	5.20067e-05	0.000355567	AC090825.1	15	99807023	99877148	+	1291	lincRNA	-	-	72	63	0	4	1.57149	1.53016	0	0.118313
ENSG00000253706	45.8374	67.4752	0	1.04348	6.57289	5.2347e-05	0.000357687	AC011632.1	8	74798784	74866939	-	3611	antisense	-	-	60	79	0	1	0.468199	0.685997	0	0.0105748
ENSG00000184347	77.1596	59.7882	8.34947	1.04348	3.94274	5.2497e-05	0.000358608	SLIT3	5	168661733	169301129	-	14260	protein_coding	slit guidance ligand 3 [Source:HGNC Symbol;Acc:HGNC:11087]	Laminin_G_2	101	70	6	1	0.199576	0.153922	0.0212709	0.00267781
ENSG00000117586	51.949	48.6846	0	2.08696	5.44405	5.26048e-05	0.000359241	TNFSF4	1	173183734	173207313	-	3942	protein_coding	TNF superfamily member 4 [Source:HGNC Symbol;Acc:HGNC:11934]	-	68	57	0	2	0.48607	0.453399	0	0.0193737
ENSG00000105497	322.39	338.23	58.4463	78.2608	2.26936	5.27986e-05	0.00036046	ZNF175	19	51571298	51592508	+	7396	protein_coding	zinc finger protein 175 [Source:HGNC Symbol;Acc:HGNC:12964]	KRAB	422	396	42	75	1.60776	1.67888	0.287082	0.387225
ENSG00000088970	423.232	427.058	61.2295	110.609	2.30174	5.33446e-05	0.000364082	KIZ	20	21125983	21246622	+	5207	protein_coding	kizuna centrosomal protein [Source:HGNC Symbol;Acc:HGNC:15865]	-	554	500	44	106	2.99798	3.01096	0.427188	0.777351
ENSG00000228274	71.8119	99.9316	9.74105	9.3913	3.167	5.39817e-05	0.000368005	AL021707.2	22	38667585	38681820	-	3358	antisense	-	-	94	117	7	9	0.788776	1.09252	0.105383	0.102344
ENSG00000169594	75.6317	72.5999	8.34947	6.26087	3.35496	5.43364e-05	0.000370203	BNC1	15	83255903	83284714	-	4795	protein_coding	basonuclin 1 [Source:HGNC Symbol;Acc:HGNC:1081]	-	99	85	6	6	0.581772	0.555844	0.0632581	0.0477817
ENSG00000254910	48.8932	51.247	0	2.08696	5.43685	5.43512e-05	0.000370203	AC136475.2	11	310139	311141	-	392	antisense	-	-	64	60	0	2	4.60045	4.79941	0	0.194824
ENSG00000279092	38.9618	24.7694	0	0	7.16839	5.45401e-05	0.000371382	AC025678.3	15	34415450	34420273	-	4824	TEC	-	-	51	29	0	0	0.297899	0.188501	0	0
ENSG00000198440	135.22	109.327	11.1326	21.913	2.87024	5.47898e-05	0.000372975	ZNF583	19	56397966	56436035	+	8060	protein_coding	zinc finger protein 583 [Source:HGNC Symbol;Acc:HGNC:26427]	KRAB	177	128	8	21	0.618792	0.497964	0.0501775	0.0994908
novel.594	514.907	84.5575	0	0	10.4011	5.55497e-05	0.00037793	-	CHR_HSCHR6_MHC_COX_CTG1	31259789	31262368	-	1158	-	PF07654:Immunoglobulin C1-set domain|PF00129:Class I Histocompatibility antigen, domains alpha 1 and 2|PF06623:MHC_I C-terminus	MHC_I	674	99	0	0	16.4005	2.68071	0	0
ENSG00000106070	2309.44	2282.2	659.608	453.913	2.04455	5.57456e-05	0.000379044	GRB10	7	50590063	50793462	-	9795	protein_coding	growth factor receptor bound protein 10 [Source:HGNC Symbol;Acc:HGNC:4564]	SH2	3023	2672	474	435	8.69641	8.55371	2.4464	1.69584
novel.22	32.8501	29.8941	0	0	7.14521	5.58704e-05	0.000379752	-	1	227971216	227972720	-	373	-	PF15788:Domain of unknown function (DUF4705)	-	43	35	0	0	3.24837	2.94227	0	0
ENSG00000240990	155.847	144.346	27.8316	3.13043	3.31439	5.63527e-05	0.000382401	HOXA11-AS	7	27184518	27189293	+	2917	antisense	HOXA11 antisense RNA [Source:HGNC Symbol;Acc:HGNC:24957]	-	204	169	20	3	1.97061	1.81666	0.346615	0.0392721
ENSG00000142156	3043.6	3062.86	882.261	338.087	2.32418	5.65632e-05	0.000383701	COL6A1	21	45981737	46005050	+	5343	protein_coding	collagen type VI alpha 1 chain [Source:HGNC Symbol;Acc:HGNC:2211]	VWA	3984	3586	634	324	21.0107	21.0449	5.99871	2.31557
ENSG00000138386	908.344	996.754	134.983	269.217	2.23396	5.65767e-05	0.000383701	NAB1	2	190646746	190692766	+	4887	protein_coding	NGFI-A binding protein 1 [Source:HGNC Symbol;Acc:HGNC:7626]	-	1189	1167	97	258	6.85561	7.48775	1.00342	2.01593
ENSG00000110888	605.818	622.651	93.2358	168	2.22981	5.72112e-05	0.000387892	CAPRIN2	12	30709552	30754951	-	8392	protein_coding	caprin family member 2 [Source:HGNC Symbol;Acc:HGNC:21259]	-	793	729	67	161	2.66265	2.72386	0.403611	0.732587
ENSG00000170903	907.58	880.594	82.1032	244.174	2.45013	5.72381e-05	0.000387964	MSANTD4	11	105995623	106022403	-	5105	protein_coding	Myb/SANT DNA binding domain containing 4 with coiled-coils [Source:HGNC Symbol;Acc:HGNC:29383]	-	1188	1031	59	234	6.55733	6.33265	0.584265	1.75033
ENSG00000280120	259.745	182.781	5.56632	43.8261	3.1392	5.73098e-05	0.000388338	AC073857.1	12	123152324	123153377	-	1054	TEC	-	-	340	214	4	42	9.0896	6.36643	0.191855	1.52162
ENSG00000227954	35.142	27.3317	0	0	7.13928	5.824e-05	0.000394076	TARID	6	133502252	133892802	-	7862	antisense	TCF21 antisense RNA inducing promoter demethylation [Source:HGNC Symbol;Acc:HGNC:50506]	-	46	32	0	0	0.164866	0.127626	0	0
ENSG00000159921	1084.05	1111.21	232.394	298.435	2.04714	5.836e-05	0.000394661	GNE	9	36214441	36277056	-	5921	protein_coding	glucosamine (UDP-N-acetyl)-2-epimerase/N-acetylmannosamine kinase [Source:HGNC Symbol;Acc:HGNC:23657]	ROK	1419	1301	167	286	6.75295	6.88977	1.42585	1.84446
ENSG00000257135	56.5328	52.9552	0	1.04348	6.52407	5.89954e-05	0.000398664	AC007249.2	2	10448694	10451327	+	1753	lincRNA	-	-	74	62	0	1	1.18948	1.109	0	0.021783
ENSG00000172986	615.749	637.171	54.2716	166.956	2.49564	5.90025e-05	0.000398664	GXYLT2	3	72888073	72998138	+	3667	protein_coding	glucoside xylosyltransferase 2 [Source:HGNC Symbol;Acc:HGNC:33383]	Glyco_transf_8	806	746	39	160	6.19342	6.37897	0.53766	1.66613
ENSG00000198730	3880.9	3830.71	548.282	1144.7	2.18674	5.92322e-05	0.000399986	CTR9	11	10750987	10801625	+	6026	protein_coding	CTR9 homolog, Paf1/RNA polymerase II complex component [Source:HGNC Symbol;Acc:HGNC:16850]	-	5080	4485	394	1097	23.7542	23.3376	3.30538	6.95146
ENSG00000134901	688.325	714.041	68.1874	190.956	2.43096	5.95895e-05	0.000402169	KDELC1	13	102784281	102799007	-	2367	protein_coding	KDEL motif containing 1 [Source:HGNC Symbol;Acc:HGNC:19350]	-	901	836	49	183	10.7259	11.0747	1.04653	2.95224
ENSG00000121903	346.836	363.854	68.1874	84.5217	2.21611	5.98962e-05	0.000404009	ZSCAN20	1	33472645	33496507	+	5308	protein_coding	zinc finger and SCAN domain containing 20 [Source:HGNC Symbol;Acc:HGNC:13093]	SCAN	454	426	49	81	2.41008	2.51653	0.46668	0.582711
ENSG00000105696	230.715	252.818	58.4463	24	2.56431	6.06808e-05	0.000409067	TMEM59L	19	18607430	18621039	+	2626	protein_coding	transmembrane protein 59 like [Source:HGNC Symbol;Acc:HGNC:13237]	-	302	296	42	23	3.24055	3.53443	0.808553	0.334451
ENSG00000164023	686.797	693.543	69.5789	188.87	2.41206	6.07605e-05	0.000409487	SGMS2	4	107824563	107915047	+	7635	protein_coding	sphingomyelin synthase 2 [Source:HGNC Symbol;Acc:HGNC:28395]	-	899	812	50	181	3.31785	3.3348	0.331066	0.90525
ENSG00000126070	1240.67	1315.34	242.135	363.13	2.07697	6.10695e-05	0.000411216	AGO3	1	35930718	36072500	+	21157	protein_coding	argonaute 3, RISC catalytic component [Source:HGNC Symbol;Acc:HGNC:18421]	Piwi	1624	1540	174	348	2.16291	2.28239	0.415766	0.628093
ENSG00000108176	466.013	502.221	26.44	118.956	2.72587	6.14516e-05	0.000413555	DNAJC12	10	67796665	67838166	-	2121	protein_coding	DnaJ heat shock protein family (Hsp40) member C12 [Source:HGNC Symbol;Acc:HGNC:28908]	DnaJ	610	588	19	114	8.10393	8.69279	0.452863	2.0524
ENSG00000107105	316.278	232.32	16.6989	63.6522	2.75663	6.2471e-05	0.000420295	ELAVL2	9	23690104	23826337	-	5140	protein_coding	ELAV like RNA binding protein 2 [Source:HGNC Symbol;Acc:HGNC:3313]	RRM_1	414	272	12	61	2.26957	1.65931	0.118024	0.453175
ENSG00000236255	91.6748	118.722	16.6989	11.4783	2.9115	6.26947e-05	0.00042168	AC009404.1	2	117833937	117841658	+	4058	lincRNA	-	-	120	139	12	11	0.833251	1.07405	0.149494	0.103509
ENSG00000278500	25.2106	36.727	0	0	7.12562	6.28877e-05	0.000422857	AC009336.2	2	176151085	176173097	+	3521	protein_coding	-	Homeobox	33	43	0	0	0.264091	0.382935	0	0
ENSG00000164236	505.739	480.868	128.025	93.913	2.15476	6.34066e-05	0.000425741	ANKRD33B	5	10564330	10657816	+	9783	protein_coding	ankyrin repeat domain 33B [Source:HGNC Symbol;Acc:HGNC:35240]	-	662	563	92	90	1.90674	1.80451	0.475411	0.351293
ENSG00000159307	82.5073	64.9129	9.74105	4.17391	3.43958	6.36977e-05	0.000427357	SCUBE1	22	43197283	43343388	-	12135	protein_coding	signal peptide, CUB domain and EGF like domain containing 1 [Source:HGNC Symbol;Acc:HGNC:13441]	CUB	108	76	7	4	0.250779	0.19638	0.0291616	0.0125869
ENSG00000137955	3797.63	3635.97	356.244	1066.43	2.38443	6.40083e-05	0.00042917	RABGGTB	1	75786197	75795079	+	5913	protein_coding	Rab geranylgeranyltransferase beta subunit [Source:HGNC Symbol;Acc:HGNC:9796]	-	4971	4257	256	1022	23.6888	22.5745	2.1887	6.59997
ENSG00000107611	31.3222	29.8941	0	0	7.10955	6.40753e-05	0.000429376	CUBN	10	16823964	17129831	-	13168	protein_coding	cubilin [Source:HGNC Symbol;Acc:HGNC:2548]	CUB	41	35	0	0	0.0877345	0.0833433	0	0
ENSG00000266524	31.3222	29.8941	0	0	7.10955	6.40753e-05	0.000429376	GDF10	10	47300386	47313547	+	2458	protein_coding	growth differentiation factor 10 [Source:HGNC Symbol;Acc:HGNC:4215]	-	41	35	0	0	0.470011	0.446487	0	0
ENSG00000170390	160.431	159.72	34.7895	12.5217	2.77843	6.4205e-05	0.000430123	DCLK2	4	150078274	150257457	+	4606	protein_coding	doublecortin like kinase 2 [Source:HGNC Symbol;Acc:HGNC:19002]	Pkinase	210	187	25	12	1.2847	1.27303	0.274391	0.0994847
ENSG00000183020	533.242	643.15	134.983	139.826	2.09755	6.45408e-05	0.00043225	AP2A2	11	924894	1012245	+	9638	protein_coding	adaptor related protein complex 2 alpha 2 subunit [Source:HGNC Symbol;Acc:HGNC:562]	-	698	753	97	134	2.04068	2.4498	0.50879	0.530905
ENSG00000168811	59.5886	57.2258	2.78316	5.21739	3.83654	6.47152e-05	0.000433294	IL12A	3	159988750	159996019	+	2040	protein_coding	interleukin 12A [Source:HGNC Symbol;Acc:HGNC:5969]	-	78	67	2	5	1.07738	1.02983	0.0495625	0.093592
ENSG00000243230	32.0862	29.04	0	0	7.10752	6.47576e-05	0.000433455	AC011005.4	7	129209775	129213545	-	535	antisense	-	-	42	34	0	0	2.21209	1.99273	0	0
ENSG00000176273	917.512	932.695	115.501	264	2.28228	6.57841e-05	0.000440077	SLC35G1	10	93893973	93956062	+	6829	protein_coding	solute carrier family 35 member G1 [Source:HGNC Symbol;Acc:HGNC:26607]	-	1201	1092	83	253	4.95556	5.01404	0.614433	1.41469
ENSG00000116906	2444.66	2379.57	340.937	716.869	2.18807	6.61631e-05	0.000442362	GNPAT	1	231241207	231277973	+	3261	protein_coding	glyceronephosphate O-acyltransferase [Source:HGNC Symbol;Acc:HGNC:4416]	Acyltransferase	3200	2786	245	687	27.6507	26.7888	3.79812	8.04461
ENSG00000164619	79.4515	111.035	12.5242	11.4783	2.99081	6.6491e-05	0.000444302	BMPER	7	33904911	34155872	+	5888	protein_coding	BMP binding endothelial regulator [Source:HGNC Symbol;Acc:HGNC:24154]	VWD	104	130	9	11	0.497705	0.692306	0.0772731	0.0713385
ENSG00000104112	25.9745	35.0188	0	0	7.1036	6.734e-05	0.000449848	SCG3	15	51681353	51721031	+	3315	protein_coding	secretogranin III [Source:HGNC Symbol;Acc:HGNC:13707]	-	34	41	0	0	0.289003	0.387813	0	0
ENSG00000231752	74.1038	57.2258	0	7.30435	4.07336	6.74717e-05	0.000450473	EMBP1	1	121519112	121571892	+	4333	transcribed_unprocessed_pseudogene	embigin pseudogene 1 [Source:HGNC Symbol;Acc:HGNC:38661]	-	97	67	0	7	0.630797	0.484851	0	0.0616891
ENSG00000056291	47.3653	49.5388	0	2.08696	5.39015	6.77672e-05	0.000452318	NPFFR2	4	72031804	72148067	+	2359	protein_coding	neuropeptide FF receptor 2 [Source:HGNC Symbol;Acc:HGNC:4525]	7tm_1	62	58	0	2	0.740577	0.770944	0	0.0323743
ENSG00000277128	55.0049	60.6423	4.17474	4.17391	3.79186	6.78338e-05	0.000452634	AL589743.5	14	19124807	19175530	-	7344	lincRNA	-	-	72	71	3	4	0.276253	0.303144	0.0206511	0.0207982
ENSG00000261534	158.139	161.428	34.7895	15.6522	2.67945	6.79066e-05	0.000452992	AL596244.1	9	121815674	121819452	-	3779	sense_overlapping	-	-	207	189	25	15	1.54348	1.56822	0.334439	0.15157
ENSG00000163946	6078.8	6259.82	571.939	1780.17	2.39052	6.88994e-05	0.000458837	FAM208A	3	56620133	56683237	-	9824	protein_coding	family with sequence similarity 208 member A [Source:HGNC Symbol;Acc:HGNC:30314]	-	7957	7329	411	1706	22.8227	23.3926	2.11498	6.63116
ENSG00000228716	8330.95	8332.76	988.021	2488.69	2.26051	6.97329e-05	0.000464126	DHFR	5	80626228	80654983	-	4409	protein_coding	dihydrofolate reductase [Source:HGNC Symbol;Acc:HGNC:2861]	-	10905	9756	710	2385	69.6935	69.3832	8.14089	20.656
ENSG00000169432	32.0862	28.1858	0	0	7.08728	7.02247e-05	0.000467136	SCN9A	2	166195185	166376001	-	13741	protein_coding	sodium voltage-gated channel alpha subunit 9 [Source:HGNC Symbol;Acc:HGNC:10597]	Ion_trans	42	33	0	0	0.0861266	0.075304	0	0
ENSG00000187676	1087.87	1219.68	179.514	336	2.16021	7.1328e-05	0.000473941	B3GLCT	13	31199936	31332276	+	4566	protein_coding	beta 3-glucosyltransferase [Source:HGNC Symbol;Acc:HGNC:20207]	Fringe	1424	1428	129	322	8.78781	9.80652	1.42826	2.69289
ENSG00000128536	174.182	154.595	36.181	17.7391	2.62234	7.41102e-05	0.000490907	CDHR3	7	105876796	106033773	+	7087	protein_coding	cadherin related family member 3 [Source:HGNC Symbol;Acc:HGNC:26308]	-	228	181	26	17	0.906523	0.800827	0.185466	0.0915979
ENSG00000164291	478.237	456.952	69.5789	127.304	2.24327	7.43523e-05	0.000492235	ARSK	5	95555074	95605064	+	4314	protein_coding	arylsulfatase family member K [Source:HGNC Symbol;Acc:HGNC:25239]	Sulfatase	626	535	50	122	4.08884	3.88863	0.585927	1.07989
ENSG00000230910	31.3222	28.1858	0	0	7.06883	7.52923e-05	0.000497899	AL391807.1	6	68629962	68635027	-	2948	antisense	-	-	41	33	0	0	0.391889	0.351002	0	0
ENSG00000241058	436.219	345.063	57.0547	102.261	2.28876	7.57104e-05	0.000500369	NSUN6	10	18545561	18659285	-	3498	protein_coding	NOP2/Sun RNA methyltransferase family member 6 [Source:HGNC Symbol;Acc:HGNC:23529]	-	571	404	41	98	4.59963	3.62146	0.59254	1.06981
ENSG00000105849	2362.15	2404.34	193.429	673.043	2.45798	7.5863e-05	0.000501112	TWISTNB	7	19695462	19709087	-	3997	protein_coding	TWIST neighbor [Source:HGNC Symbol;Acc:HGNC:18027]	-	3092	2815	139	645	21.7978	22.0834	1.75806	6.16204
ENSG00000137135	942.722	966.006	217.086	256.696	2.00961	7.68373e-05	0.000506556	ARHGEF39	9	35658875	35675866	-	6496	protein_coding	Rho guanine nucleotide exchange factor 39 [Source:HGNC Symbol;Acc:HGNC:25909]	RhoGEF	1234	1131	156	246	5.35273	5.45933	1.21404	1.44607
ENSG00000147509	66.4642	78.5787	4.17474	9.3913	3.38651	7.72539e-05	0.00050916	RGS20	8	53851808	53959303	+	3192	protein_coding	regulator of G protein signaling 20 [Source:HGNC Symbol;Acc:HGNC:14600]	RGS	87	92	3	9	0.768003	0.903748	0.047513	0.107666
ENSG00000158290	6343.13	6164.16	578.897	1821.91	2.38055	7.72756e-05	0.00050916	CUL4B	X	120524609	120575794	-	7031	protein_coding	cullin 4B [Source:HGNC Symbol;Acc:HGNC:2555]	Cullin	8303	7217	416	1746	33.2755	32.1856	2.99109	9.48257
ENSG00000169371	614.985	647.42	108.543	176.348	2.14479	7.73182e-05	0.000509299	SNUPN	15	75598083	75626469	-	3516	protein_coding	snurportin 1 [Source:HGNC Symbol;Acc:HGNC:14245]	-	805	758	78	169	6.45139	6.75994	1.1215	1.83543
ENSG00000162735	2097.82	2066.96	480.095	588.522	1.9621	7.78142e-05	0.000512423	PEX19	1	160276812	160286348	-	4461	protein_coding	peroxisomal biogenesis factor 19 [Source:HGNC Symbol;Acc:HGNC:9713]	-	2746	2420	345	564	17.345	17.0101	3.90967	4.82776
ENSG00000118454	1964.9	1973.86	446.697	559.304	1.96864	7.80022e-05	0.000513375	ANKRD13C	1	70260588	70354734	-	4595	protein_coding	ankyrin repeat domain 13C [Source:HGNC Symbol;Acc:HGNC:25374]	-	2572	2311	321	536	15.7722	15.7702	3.53161	4.45429
ENSG00000151422	1036.69	1036.9	76.5368	283.826	2.52058	7.81919e-05	0.000514337	FER	5	108747822	109196841	+	13614	protein_coding	FER tyrosine kinase [Source:HGNC Symbol;Acc:HGNC:3655]	Pkinase_Tyr	1357	1214	55	272	2.80867	2.79612	0.204235	0.762925
ENSG00000137270	25.2106	34.1647	0	0	7.0648	7.83164e-05	0.000515012	GCM1	6	53126964	53148829	-	2765	protein_coding	glial cells missing homolog 1 [Source:HGNC Symbol;Acc:HGNC:4197]	GCM	33	40	0	0	0.336299	0.453615	0	0
ENSG00000274372	23.6827	35.8729	0	0	7.06897	7.90662e-05	0.000519654	AC239803.4	1	148021850	148025931	+	588	lincRNA	-	-	31	42	0	0	1.48556	2.23972	0	0
ENSG00000259026	29.0303	29.8941	0	0	7.05434	7.93379e-05	0.000521294	AL049833.2	14	97110416	97119247	-	1274	lincRNA	-	-	38	35	0	0	0.840467	0.861432	0	0
ENSG00000110318	187.933	211.821	6.95789	42.7826	2.98263	7.94961e-05	0.000522043	CEP126	11	101915015	102001058	+	8191	protein_coding	centrosomal protein 126 [Source:HGNC Symbol;Acc:HGNC:29264]	-	246	248	5	41	0.846262	0.949374	0.0308594	0.191137
ENSG00000100678	41.2537	53.8093	0	2.08696	5.36286	7.99294e-05	0.00052445	SLC8A3	14	70044217	70189070	-	8444	protein_coding	solute carrier family 8 member A3 [Source:HGNC Symbol;Acc:HGNC:11070]	Na_Ca_ex	54	63	0	2	0.180199	0.233946	0	0.00904442
ENSG00000168301	368.991	341.647	37.5726	93.913	2.42572	8.14898e-05	0.000534392	KCTD6	3	58492114	58502360	+	3068	protein_coding	potassium channel tetramerization domain containing 6 [Source:HGNC Symbol;Acc:HGNC:22235]	K_tetra	483	400	27	90	4.43607	4.08815	0.4449	1.12018
ENSG00000178403	43.5455	58.0799	4.17474	1.04348	4.35836	8.17669e-05	0.00053606	NEUROG2	4	112513516	112516172	-	2287	protein_coding	neurogenin 2 [Source:HGNC Symbol;Acc:HGNC:13805]	HLH	57	68	3	1	0.702288	0.932321	0.0663145	0.0166968
ENSG00000165424	910.636	909.634	264.4	161.739	2.09681	8.22149e-05	0.000538744	ZCCHC24	10	79382325	79445627	-	5051	protein_coding	zinc finger CCHC-type containing 24 [Source:HGNC Symbol;Acc:HGNC:26911]	-	1192	1065	190	155	6.64975	6.61142	1.90165	1.1718
ENSG00000213612	60.3526	43.5599	0	4.17391	4.51985	8.24698e-05	0.000540218	FAM220CP	9	97121659	97122489	+	831	processed_pseudogene	family with sequence similarity 220 member C, pseudogene [Source:HGNC Symbol;Acc:HGNC:43640]	-	79	51	0	4	2.67875	1.92438	0	0.183805
ENSG00000269883	71.8119	48.6846	0	6.26087	4.16606	8.31497e-05	0.00054437	AC007375.3	14	77140683	77142996	+	2314	antisense	-	-	94	57	0	6	1.14465	0.772385	0	0.0990117
ENSG00000136237	313.222	294.67	47.3137	77.2174	2.28169	8.36824e-05	0.000547402	RAPGEF5	7	22118238	22357144	-	10245	protein_coding	Rap guanine nucleotide exchange factor 5 [Source:HGNC Symbol;Acc:HGNC:16862]	-	410	345	34	74	1.12766	1.05592	0.167772	0.275815
ENSG00000226091	69.52	68.3293	8.34947	5.21739	3.36489	8.41028e-05	0.000549847	LINC00937	12	8295986	8396803	-	5663	lincRNA	long intergenic non-protein coding RNA 937 [Source:HGNC Symbol;Acc:HGNC:48629]	-	91	80	6	5	0.452795	0.442962	0.0535622	0.0337149
ENSG00000137601	1416.38	1467.37	148.899	420.522	2.33793	8.42385e-05	0.000550582	NEK1	4	169392857	169612629	-	8308	protein_coding	NIMA related kinase 1 [Source:HGNC Symbol;Acc:HGNC:7744]	Pkinase	1854	1718	107	403	6.2881	6.48409	0.65109	1.85228
ENSG00000176390	761.665	745.644	100.194	218.087	2.23995	8.49814e-05	0.000555035	CRLF3	17	30769388	30824776	-	4472	protein_coding	cytokine receptor like factor 3 [Source:HGNC Symbol;Acc:HGNC:17177]	-	997	873	72	209	6.28203	6.12118	0.813925	1.78461
ENSG00000160539	50.4211	52.9552	4.17474	2.08696	4.08416	8.49904e-05	0.000555035	PLPP7	9	131289459	131359022	+	4350	protein_coding	phospholipid phosphatase 7 (inactive) [Source:HGNC Symbol;Acc:HGNC:28174]	-	66	62	3	2	0.427525	0.446915	0.0348647	0.0175566
ENSG00000153904	1407.97	1387.09	247.701	416.348	2.0721	8.50584e-05	0.000555326	DDAH1	1	85318481	85578363	-	4568	protein_coding	dimethylarginine dimethylaminohydrolase 1 [Source:HGNC Symbol;Acc:HGNC:2715]	-	1843	1624	178	399	11.3686	11.1476	1.96992	3.33538
ENSG00000231527	28.2664	29.8941	0	0	7.03546	8.53894e-05	0.000557333	CR769775.1	9	61972240	61976380	+	1940	processed_transcript	-	-	37	35	0	0	0.537411	0.565704	0	0
ENSG00000122484	1563.06	1628.8	125.242	449.739	2.47024	8.55789e-05	0.000558261	RPAP2	1	92298965	92402056	+	17142	protein_coding	RNA polymerase II associated protein 2 [Source:HGNC Symbol;Acc:HGNC:25791]	-	2046	1907	90	431	3.36318	3.48828	0.265421	0.960096
ENSG00000271138	33.6141	24.7694	0	0	7.0417	8.58117e-05	0.000559625	IGLVIVOR22-1	22	25437306	25437823	-	397	IG_V_pseudogene	immunoglobulin lambda variable (IV)/OR22-1 (pseudogene) [Source:HGNC Symbol;Acc:HGNC:15694]	-	44	29	0	0	3.12298	2.2905	0	0
ENSG00000266265	55.7688	46.1223	0	1.04348	6.42099	8.60131e-05	0.000560629	KLF14	7	130731235	130734061	-	2827	protein_coding	Kruppel like factor 14 [Source:HGNC Symbol;Acc:HGNC:23025]	zf-C2H2	73	54	0	1	0.727618	0.59895	0	0.0135074
ENSG00000230778	22.1547	36.727	0	0	7.05239	8.63425e-05	0.00056262	ANKRD63	15	40281444	40282586	-	1143	protein_coding	ankyrin repeat domain 63 [Source:HGNC Symbol;Acc:HGNC:40027]	-	29	43	0	0	0.714921	1.17963	0	0
ENSG00000143340	55.0049	46.9764	1.39158	0	6.39246	8.74987e-05	0.000569683	FAM163A	1	179743163	179816198	+	2909	protein_coding	family with sequence similarity 163 member A [Source:HGNC Symbol;Acc:HGNC:28274]	-	72	55	1	0	0.697421	0.592846	0.0173784	0
ENSG00000172728	456.082	426.204	89.061	113.739	2.11915	8.77871e-05	0.000571403	FUT10	8	33370824	33473422	-	5606	protein_coding	fucosyltransferase 10 [Source:HGNC Symbol;Acc:HGNC:19234]	-	597	499	64	109	3.00074	2.79107	0.577139	0.742459
ENSG00000122756	184.877	130.68	33.3979	18.7826	2.60836	8.82782e-05	0.000574125	CNTFR	9	34551432	34590140	-	2111	protein_coding	ciliary neurotrophic factor receptor [Source:HGNC Symbol;Acc:HGNC:2170]	fn3	242	153	24	18	3.23023	2.27261	0.574747	0.325599
ENSG00000138399	1115.38	1097.54	97.4105	315.13	2.41989	8.86793e-05	0.000576257	FASTKD1	2	169529749	169573875	-	4451	protein_coding	FAST kinase domains 1 [Source:HGNC Symbol;Acc:HGNC:26150]	-	1460	1285	70	302	9.24276	9.05249	0.795049	2.59089
ENSG00000151229	609.637	556.03	66.7958	164.87	2.32583	9.02531e-05	0.000585356	SLC2A13	12	39755021	40106089	-	10027	protein_coding	solute carrier family 2 member 13 [Source:HGNC Symbol;Acc:HGNC:15956]	Sugar_tr	798	651	48	158	2.24253	2.03579	0.242005	0.601707
ENSG00000162664	3263.62	3268.7	378.509	987.13	2.257	9.05153e-05	0.000586895	ZNF326	1	89995112	90035531	+	10984	protein_coding	zinc finger protein 326 [Source:HGNC Symbol;Acc:HGNC:14104]	-	4272	3827	272	946	10.9592	10.925	1.25188	3.28874
ENSG00000164048	1033.63	1025.79	296.406	212.87	2.01697	9.15058e-05	0.000592504	ZNF589	3	48241100	48299253	+	5521	protein_coding	zinc finger protein 589 [Source:HGNC Symbol;Acc:HGNC:16747]	-	1353	1201	213	204	6.90536	6.821	1.95036	1.41095
ENSG00000203808	29.0303	28.1858	0	0	7.01202	9.34165e-05	0.000603716	BVES-AS1	6	105136308	105169945	+	2347	antisense	BVES antisense RNA 1 [Source:HGNC Symbol;Acc:HGNC:21223]	-	38	33	0	0	0.456223	0.440883	0	0
ENSG00000198814	624.916	626.922	87.6695	180.522	2.21865	9.42627e-05	0.000609019	GK	X	30653359	30731456	+	5359	protein_coding	glycerol kinase [Source:HGNC Symbol;Acc:HGNC:4289]	FGGY_N	818	734	63	173	4.30106	4.29472	0.594307	1.23271
ENSG00000145428	43.5455	48.6846	0	2.08696	5.31983	9.45393e-05	0.000610472	RNF175	4	153710125	153760235	-	4390	protein_coding	ring finger protein 175 [Source:HGNC Symbol;Acc:HGNC:27735]	-	57	57	0	2	0.365862	0.40713	0	0.0173966
ENSG00000110060	627.208	610.693	82.1032	178.435	2.24398	9.56524e-05	0.000616816	PUS3	11	125893485	125903221	-	2010	protein_coding	pseudouridylate synthase 3 [Source:HGNC Symbol;Acc:HGNC:25461]	-	821	715	59	171	11.5094	11.154	1.48392	3.24862
ENSG00000188906	99.3143	78.5787	12.5242	10.4348	2.96039	9.66952e-05	0.0006232	LRRK2	12	40196744	40369285	+	13491	protein_coding	leucine rich repeat kinase 2 [Source:HGNC Symbol;Acc:HGNC:18618]	Pkinase	130	92	9	10	0.271522	0.213829	0.033725	0.0283044
ENSG00000163050	3801.45	3751.28	1174.49	632.348	2.06414	9.70796e-05	0.000625336	COQ8A	1	226897536	226987545	+	7797	protein_coding	coenzyme Q8A [Source:HGNC Symbol;Acc:HGNC:16812]	ABC1	4976	4392	844	606	17.9829	17.6627	5.47228	2.96786
ENSG00000136059	129.109	107.619	23.6568	10.4348	2.81651	9.74721e-05	0.000627692	VILL	3	37988059	38007188	+	6476	protein_coding	villin like [Source:HGNC Symbol;Acc:HGNC:30906]	-	169	126	17	10	0.735337	0.610079	0.132708	0.0589647
ENSG00000224817	35.142	22.207	0	0	7.0162	9.81486e-05	0.000631697	AC010789.1	10	101704652	101708401	-	291	lincRNA	-	-	46	26	0	0	4.45422	2.80158	0	0
ENSG00000143632	49.6572	58.934	5.56632	0	4.40633	9.81741e-05	0.000631697	ACTA1	1	229431245	229434098	-	1495	protein_coding	actin, alpha 1, skeletal muscle [Source:HGNC Symbol;Acc:HGNC:129]	Actin	65	69	4	0	1.22512	1.44721	0.135261	0
ENSG00000106025	445.387	407.414	104.368	96	2.09033	9.82542e-05	0.000632039	TSPAN12	7	120787320	120858402	-	3368	protein_coding	tetraspanin 12 [Source:HGNC Symbol;Acc:HGNC:21641]	Tetraspannin	583	477	75	92	4.87756	4.44088	1.12575	1.04307
ENSG00000184221	27.5024	29.04	0	0	6.99476	9.98412e-05	0.000641549	OLIG1	21	33070144	33072420	+	2277	protein_coding	oligodendrocyte transcription factor 1 [Source:HGNC Symbol;Acc:HGNC:16983]	HLH	36	34	0	0	0.445498	0.468208	0	0
ENSG00000125885	3002.35	2931.33	436.956	920.348	2.12727	0.000101028	0.000648997	MCM8	20	5950652	5998977	+	7691	protein_coding	minichromosome maintenance 8 homologous recombination repair factor [Source:HGNC Symbol;Acc:HGNC:16147]	MCM	3930	3432	314	882	14.3985	13.9922	2.06396	4.3791
ENSG00000104833	517.963	474.035	132.2	32.3478	2.60028	0.000101567	0.000652283	TUBB4A	19	6494319	6502848	-	3466	protein_coding	tubulin beta 4A class IVa [Source:HGNC Symbol;Acc:HGNC:20774]	Tubulin	678	555	95	31	5.51198	5.02096	1.38563	0.341532
ENSG00000163520	119.177	91.3905	19.4821	3.13043	3.26236	0.000102108	0.000655222	FBLN2	3	13549131	13638422	+	4812	protein_coding	fibulin 2 [Source:HGNC Symbol;Acc:HGNC:3601]	EGF_CA	156	107	14	3	0.913493	0.697238	0.147081	0.0238064
ENSG00000152133	1032.11	1081.31	62.621	285.913	2.59597	0.000102219	0.000655755	GPATCH11	2	37084451	37099244	+	4040	protein_coding	G-patch domain containing 11 [Source:HGNC Symbol;Acc:HGNC:26768]	G-patch	1351	1266	45	274	9.42281	9.82596	0.563099	2.58981
ENSG00000151702	33.6141	23.0611	0	0	6.999	0.00010261	0.000657909	FLI1	11	128686535	128813267	+	8172	protein_coding	Fli-1 proto-oncogene, ETS transcription factor [Source:HGNC Symbol;Acc:HGNC:3749]	Ets	44	27	0	0	0.151716	0.1036	0	0
ENSG00000256806	177.238	195.593	36.181	36.5217	2.35816	0.000102679	0.000658174	C17orf100	17	6651718	6693202	+	2474	protein_coding	chromosome 17 open reading frame 100 [Source:HGNC Symbol;Acc:HGNC:34494]	-	232	229	26	35	2.64238	2.90241	0.531285	0.540216
ENSG00000257718	29.7943	26.4776	0	0	6.98819	0.000102789	0.000658698	AC067735.1	12	38906451	38909592	+	526	antisense	-	-	39	31	0	0	2.08923	1.84799	0	0
ENSG00000162601	3348.42	3382.3	225.436	949.565	2.5168	0.000103706	0.000664031	MYSM1	1	58654739	58700092	-	8938	protein_coding	Myb like, SWIRM and MPN domains 1 [Source:HGNC Symbol;Acc:HGNC:29401]	SWIRM	4383	3960	162	910	13.8178	13.8924	0.91628	3.88776
ENSG00000149548	297.179	327.127	29.2232	82.4348	2.47275	0.000104508	0.000668622	CCDC15	11	124954121	125041489	+	4823	protein_coding	coiled-coil domain containing 15 [Source:HGNC Symbol;Acc:HGNC:25798]	-	389	383	21	79	2.27268	2.49003	0.220118	0.625473
ENSG00000095713	34.378	22.207	0	0	6.99681	0.000105044	0.000671325	CRTAC1	10	97865000	98030828	-	3553	protein_coding	cartilage acidic protein 1 [Source:HGNC Symbol;Acc:HGNC:14882]	EGF_CA	45	26	0	0	0.356881	0.229457	0	0
ENSG00000149575	34.378	22.207	0	0	6.99681	0.000105044	0.000671325	SCN2B	11	118161951	118176673	-	5826	protein_coding	sodium voltage-gated channel beta subunit 2 [Source:HGNC Symbol;Acc:HGNC:10589]	V-set	45	26	0	0	0.217645	0.139935	0	0
ENSG00000133640	46.6013	61.4964	0	5.21739	4.26396	0.000105964	0.000676108	LRRIQ1	12	85036314	85263224	+	7560	protein_coding	leucine rich repeats and IQ motif containing 1 [Source:HGNC Symbol;Acc:HGNC:25708]	-	61	72	0	5	0.22736	0.29863	0	0.025255
ENSG00000245552	59.5886	39.2894	4.17474	0	4.70157	0.000108332	0.000690469	AP000787.1	11	95150539	95234104	+	5320	antisense	-	-	78	46	3	0	0.413133	0.271125	0.0285078	0
ENSG00000088035	1378.18	1332.42	40.3558	325.565	2.88506	0.000109305	0.000696483	ALG6	1	63367590	63438562	+	4950	protein_coding	ALG6, alpha-1,3-glucosyltransferase [Source:HGNC Symbol;Acc:HGNC:23157]	-	1804	1560	29	312	10.2692	9.88193	0.296174	2.40685
ENSG00000133138	397.257	367.27	25.0484	100.174	2.59957	0.000110353	0.000702784	TBC1D8B	X	106802680	106876145	+	9503	protein_coding	TBC1 domain family member 8B [Source:HGNC Symbol;Acc:HGNC:24715]	TBC	520	430	18	96	1.54187	1.41883	0.0957559	0.385753
ENSG00000144935	568.384	565.425	57.0547	161.739	2.36763	0.000110619	0.000704237	TRPC1	3	142724074	142807888	+	4768	protein_coding	transient receptor potential cation channel subfamily C member 1 [Source:HGNC Symbol;Acc:HGNC:12333]	Ion_trans	744	662	41	155	4.39686	4.35356	0.434712	1.24135
ENSG00000172346	44.3095	46.9764	2.78316	0	5.19243	0.000110641	0.000704237	CSDC2	22	41560763	41577741	+	3250	protein_coding	cold shock domain containing C2 [Source:HGNC Symbol;Acc:HGNC:30359]	CSD	58	55	2	0	0.502865	0.530642	0.03111	0
ENSG00000164764	49.6572	48.6846	2.78316	3.13043	4.04892	0.000111935	0.000711899	SBSPON	8	73064540	73124088	-	4383	protein_coding	somatomedin B and thrombospondin type 1 domain containing [Source:HGNC Symbol;Acc:HGNC:30362]	-	65	57	2	3	0.417877	0.40778	0.0230681	0.0261366
ENSG00000197816	41.2537	58.934	0	4.17391	4.46715	0.000112391	0.000714606	CCDC180	9	97307304	97378524	+	14155	protein_coding	coiled-coil domain containing 180 [Source:HGNC Symbol;Acc:HGNC:29303]	-	54	69	0	4	0.107496	0.152849	0	0.0107907
ENSG00000251593	30.5583	24.7694	0	0	6.96396	0.000113789	0.000722911	MSNP1	5	25909503	25911234	+	1732	processed_pseudogene	moesin pseudogene 1 [Source:HGNC Symbol;Acc:HGNC:7374]	Band_41	40	29	0	0	0.650757	0.525016	0	0
ENSG00000123892	34.378	21.3529	0	0	6.97494	0.000115297	0.000731308	RAB38	11	88113242	88175467	-	1465	protein_coding	RAB38, member RAS oncogene family [Source:HGNC Symbol;Acc:HGNC:9776]	Ras	45	25	0	0	0.865528	0.535088	0	0
ENSG00000214578	22.9187	32.4564	0	0	6.96408	0.000116057	0.000735539	HMGN2P15	17	42753530	42753799	-	270	processed_pseudogene	high mobility group nucleosomal binding domain 2 pseudogene 15 [Source:HGNC Symbol;Acc:HGNC:39020]	-	30	38	0	0	3.13086	4.41309	0	0
ENSG00000146463	4079.53	4208.23	695.789	1310.61	2.04581	0.000116399	0.000737271	ZMYM4	1	35268967	35422058	+	7647	protein_coding	zinc finger MYM-type containing 4 [Source:HGNC Symbol;Acc:HGNC:13055]	-	5340	4927	500	1256	19.6769	20.2029	3.30547	6.27187
ENSG00000183287	25.9745	29.04	0	0	6.95512	0.000116451	0.000737271	CCBE1	18	59430940	59697380	-	6577	protein_coding	collagen and calcium binding EGF domains 1 [Source:HGNC Symbol;Acc:HGNC:29426]	EGF_CA	34	34	0	0	0.145666	0.162097	0	0
ENSG00000122420	17.571	39.2894	0	0	7.0015	0.000116456	0.000737271	PTGFR	1	78303884	78539749	+	4714	protein_coding	prostaglandin F receptor [Source:HGNC Symbol;Acc:HGNC:9600]	7tm_1	23	46	0	0	0.137482	0.305978	0	0
ENSG00000143753	6142.21	6210.28	1100.74	1959.65	2.01266	0.000116694	0.000738582	DEGS1	1	224175756	224193441	+	2515	protein_coding	delta 4-desaturase, sphingolipid 1 [Source:HGNC Symbol;Acc:HGNC:13709]	-	8040	7271	791	1878	90.0792	90.6523	15.8998	28.5139
ENSG00000273058	70.284	52.9552	6.95789	4.17391	3.49229	0.000117406	0.000742888	AL359921.2	1	236536162	236536704	-	543	antisense	-	-	92	62	5	4	4.77413	3.58026	0.465504	0.281293
ENSG00000259764	32.0862	23.0611	0	0	6.95949	0.000117987	0.000746163	PCSK6-AS1	15	101334437	101337428	+	639	antisense	PCSK6 antisense RNA 1 [Source:HGNC Symbol;Acc:HGNC:51448]	-	42	27	0	0	1.85206	1.32491	0	0
ENSG00000117133	2126.85	2152.37	128.025	596.869	2.55942	0.000120342	0.000759692	RPF1	1	84479259	84497790	+	1728	protein_coding	ribosome production factor 1 homolog [Source:HGNC Symbol;Acc:HGNC:30350]	-	2784	2520	92	572	45.3975	45.7277	2.69152	12.6401
ENSG00000147246	136.748	106.765	4.17474	24	3.07687	0.000120351	0.000759692	HTR2C	X	114584078	114910061	+	4842	protein_coding	5-hydroxytryptamine receptor 2C [Source:HGNC Symbol;Acc:HGNC:5295]	7tm_1	179	125	3	23	1.04168	0.809483	0.031322	0.181385
ENSG00000227354	158.139	144.346	20.8737	32.3478	2.49785	0.00012078	0.000762196	RBM26-AS1	13	79406309	79424328	+	3747	antisense	RBM26 antisense RNA 1 [Source:HGNC Symbol;Acc:HGNC:39805]	-	207	169	15	31	1.55666	1.41425	0.202377	0.31592
ENSG00000110900	48.1293	41.8517	2.78316	0	5.17144	0.000122845	0.000774401	TSPAN11	12	30926428	30996599	+	7113	protein_coding	tetraspanin 11 [Source:HGNC Symbol;Acc:HGNC:30795]	Tetraspannin	63	49	2	0	0.249571	0.216006	0.0142145	0
ENSG00000182308	38.9618	59.7882	2.78316	3.13043	4.05412	0.000124849	0.000786615	DCAF4L1	4	41981696	41986467	+	4772	protein_coding	DDB1 and CUL4 associated factor 4 like 1 [Source:HGNC Symbol;Acc:HGNC:27723]	-	51	70	2	3	0.301145	0.45996	0.0211877	0.024006
ENSG00000126467	25.2106	29.04	0	0	6.93488	0.00012601	0.000793293	TSKS	19	49739753	49763330	-	2391	protein_coding	testis specific serine kinase substrate [Source:HGNC Symbol;Acc:HGNC:30719]	-	33	34	0	0	0.388903	0.445884	0	0
ENSG00000206561	89.3829	81.9952	13.9158	8.34782	2.96156	0.000126515	0.000796045	COLQ	3	15450133	15521751	-	4175	protein_coding	collagen like tail subunit of asymmetric acetylcholinesterase [Source:HGNC Symbol;Acc:HGNC:2226]	-	117	96	10	8	0.789652	0.721003	0.121087	0.0731699
ENSG00000138769	87.855	77.7246	9.74105	11.4783	2.9586	0.000128024	0.000805114	CDKL2	4	75578005	75630716	-	3781	protein_coding	cyclin dependent kinase like 2 [Source:HGNC Symbol;Acc:HGNC:1782]	Pkinase	115	91	7	11	0.857033	0.75467	0.0935934	0.111093
ENSG00000108578	3128.4	3169.63	919.834	795.13	1.8769	0.000128226	0.000806167	BLMH	17	30248195	30292056	-	5127	protein_coding	bleomycin hydrolase [Source:HGNC Symbol;Acc:HGNC:1059]	-	4095	3711	661	762	22.5059	22.696	6.51766	5.67532
ENSG00000125249	2068.79	2081.48	477.312	622.956	1.91485	0.000128346	0.00080671	RAP2A	13	97434222	97469128	+	5570	protein_coding	RAP2A, member of RAS oncogene family [Source:HGNC Symbol;Acc:HGNC:9861]	Ras	2708	2437	343	597	13.6993	13.719	3.1131	4.09278
ENSG00000162745	79.4515	93.0987	5.56632	14.6087	3.06634	0.000128899	0.000809538	OLFML2B	1	161983192	162023854	-	3415	protein_coding	olfactomedin like 2B [Source:HGNC Symbol;Acc:HGNC:24558]	-	104	109	4	14	0.858122	1.00083	0.0592138	0.156544
ENSG00000204131	191.753	178.51	40.3558	33.3913	2.33132	0.000129392	0.000811982	NHSL2	X	71910818	72161750	+	17706	protein_coding	NHS like 2 [Source:HGNC Symbol;Acc:HGNC:33737]	-	251	209	29	32	0.399447	0.370125	0.0828002	0.0690126
ENSG00000134369	944.25	866.928	276.924	141.913	2.11508	0.00012976	0.000814077	NAV1	1	201622885	201826969	+	22453	protein_coding	neuron navigator 1 [Source:HGNC Symbol;Acc:HGNC:15989]	-	1236	1015	199	136	1.55114	1.41747	0.448056	0.231293
ENSG00000183423	28.2664	25.6235	0	0	6.92575	0.000130177	0.000816261	LRIT3	4	109848202	109872315	+	3897	protein_coding	leucine rich repeat, Ig-like and transmembrane domains 3 [Source:HGNC Symbol;Acc:HGNC:24783]	-	37	30	0	0	0.267533	0.241387	0	0
ENSG00000113356	890.773	837.888	34.7895	222.261	2.74391	0.000131688	0.000824749	POLR3G	5	90471748	90514553	+	4019	protein_coding	RNA polymerase III subunit G [Source:HGNC Symbol;Acc:HGNC:30075]	-	1166	981	25	213	8.17498	7.65374	0.314467	2.02377
ENSG00000187944	29.0303	24.7694	0	0	6.92346	0.000131929	0.000825931	C2orf66	2	196805002	196810276	-	1669	protein_coding	chromosome 2 open reading frame 66 [Source:HGNC Symbol;Acc:HGNC:33809]	-	38	29	0	0	0.641555	0.544834	0	0
ENSG00000185272	152.027	148.616	2.78316	30.2609	3.15174	0.000132717	0.00083033	RBM11	21	14216130	14228372	+	2360	protein_coding	RNA binding motif protein 11 [Source:HGNC Symbol;Acc:HGNC:9897]	-	199	174	2	29	2.37601	2.31185	0.0428422	0.469229
novel.485	104.662	69.1834	9.74105	12.5217	2.95747	0.000132737	0.00083033	-	CHR_HSCHR18_1_CTG1_1	50375000	50394440	+	3212	-	PF07160:Spindle and kinetochore-associated protein 1	-	137	81	7	12	1.20185	0.790737	0.110173	0.142661
ENSG00000136122	806.738	822.514	54.2716	228.522	2.52128	0.000133367	0.000833827	BORA	13	72727749	72756198	+	3189	protein_coding	bora, aurora kinase A activator [Source:HGNC Symbol;Acc:HGNC:24724]	-	1056	963	39	219	9.33073	9.46879	0.61825	2.62234
ENSG00000172339	456.846	480.868	86.2779	132.522	2.09627	0.000133416	0.000833911	ALG14	1	94974407	95072945	-	9633	protein_coding	ALG14, UDP-N-acetylglucosaminyltransferase subunit [Source:HGNC Symbol;Acc:HGNC:28287]	-	598	563	62	127	1.74923	1.83261	0.325375	0.503432
ENSG00000168297	611.165	556.03	105.76	170.087	2.07825	0.000135165	0.000844173	PXK	3	58332880	58426126	+	5354	protein_coding	PX domain containing serine/threonine kinase like [Source:HGNC Symbol;Acc:HGNC:23326]	PX	800	651	76	163	4.21035	3.81263	0.717611	1.16254
ENSG00000198707	1865.58	1841.48	54.2716	454.956	2.86105	0.00013611	0.000849624	CEP290	12	88049014	88142216	-	10388	protein_coding	centrosomal protein 290 [Source:HGNC Symbol;Acc:HGNC:29021]	-	2442	2156	39	436	6.624	6.50788	0.189796	1.6027
ENSG00000196660	23.6827	29.8941	0	0	6.91667	0.000136272	0.000850311	SLC30A10	1	219685427	219958647	-	5770	protein_coding	solute carrier family 30 member 10 [Source:HGNC Symbol;Acc:HGNC:25355]	-	31	35	0	0	0.151388	0.190202	0	0
ENSG00000143171	22.9187	30.7482	0	0	6.91897	0.000136292	0.000850311	RXRG	1	165400917	165445355	-	2696	protein_coding	retinoid X receptor gamma [Source:HGNC Symbol;Acc:HGNC:10479]	Hormone_recep	30	36	0	0	0.313551	0.418702	0	0
ENSG00000131951	30.5583	23.0611	0	0	6.91886	0.000136375	0.000850604	LRRC9	14	59919713	60063559	+	5372	protein_coding	leucine rich repeat containing 9 [Source:HGNC Symbol;Acc:HGNC:19848]	-	40	27	0	0	0.209812	0.157598	0	0
ENSG00000237238	25.2106	28.1858	0	0	6.91205	0.000137095	0.000854646	BMS1P10	9	63372803	63380011	-	1120	unprocessed_pseudogene	BMS1, ribosome biogenesis factor pseudogene 10 [Source:HGNC Symbol;Acc:HGNC:49154]	-	33	33	0	0	0.830237	0.923886	0	0
ENSG00000150776	2012.26	2032.8	303.364	640.695	2.09791	0.000137626	0.000857504	NKAPD1	11	112074086	112085150	+	5755	protein_coding	NKAP domain containing 1 [Source:HGNC Symbol;Acc:HGNC:25569]	-	2634	2380	218	614	12.8966	12.9674	1.91498	4.07401
ENSG00000213468	584.427	551.759	129.417	154.435	1.99987	0.000138295	0.000861217	FIRRE	X	131691530	131830643	-	4210	lincRNA	firre intergenic repeating RNA element [Source:HGNC Symbol;Acc:HGNC:49627]	-	765	646	93	148	5.12019	4.81142	1.11675	1.34239
ENSG00000166548	321.626	306.628	80.7116	62.6087	2.13495	0.000138461	0.000861793	TK2	16	66508003	66552544	-	7169	protein_coding	thymidine kinase 2, mitochondrial [Source:HGNC Symbol;Acc:HGNC:11831]	-	421	359	58	60	1.65474	1.57021	0.409	0.319589
ENSG00000100292	1489.72	1626.24	477.312	328.696	1.9517	0.000139284	0.000866233	HMOX1	22	35380361	35394214	+	2405	protein_coding	heme oxygenase 1 [Source:HGNC Symbol;Acc:HGNC:5013]	-	1950	1904	343	315	22.8468	24.8242	7.20996	5.00143
ENSG00000272583	27.5024	25.6235	0	0	6.9051	0.000140543	0.000873601	AL592494.3	1	121518366	121518829	-	464	lincRNA	-	-	36	30	0	0	2.18621	2.02734	0	0
ENSG00000009780	476.709	424.496	87.6695	125.217	2.07903	0.000140973	0.000876046	FAM76A	1	27725979	27763122	+	4034	protein_coding	family with sequence similarity 76 member A [Source:HGNC Symbol;Acc:HGNC:28530]	-	624	497	63	120	4.35868	3.86316	0.789511	1.13591
ENSG00000122824	606.581	556.03	8.34947	0	7.15515	0.000141503	0.000878643	NUDT10	X	51332231	51337525	+	2054	protein_coding	nudix hydrolase 10 [Source:HGNC Symbol;Acc:HGNC:17621]	NUDIX	794	651	6	0	10.8925	9.93809	0.147674	0
ENSG00000065526	15914.7	16161.6	5068.13	3598.96	1.88797	0.000142382	0.000883405	SPEN	1	15847864	15940460	+	13294	protein_coding	spen family transcriptional repressor [Source:HGNC Symbol;Acc:HGNC:17575]	RRM_1	20832	18922	3642	3449	44.1552	44.6307	13.8496	9.90687
ENSG00000228933	37.4339	49.5388	0	2.08696	5.23649	0.00014284	0.000886012	AC107419.1	X	27174920	27398997	-	2820	lincRNA	-	-	49	58	0	2	0.489614	0.644914	0	0.0270819
ENSG00000116641	3555.45	3563.37	672.133	1139.48	1.97381	0.000143272	0.000888462	DOCK7	1	62454298	62688368	-	24872	protein_coding	dedicator of cytokinesis 7 [Source:HGNC Symbol;Acc:HGNC:19190]	Ded_cyto	4654	4172	483	1092	5.27257	5.25964	0.981726	1.67653
ENSG00000166173	754.789	807.14	239.352	111.652	2.15706	0.000143762	0.000891262	LARP6	15	70829130	70854159	-	5554	protein_coding	La ribonucleoprotein domain family member 6 [Source:HGNC Symbol;Acc:HGNC:24012]	-	988	945	172	107	5.01254	5.33517	1.56558	0.735659
ENSG00000117500	3976.39	4010.93	115.501	987.13	2.85544	0.000144193	0.000893699	TMED5	1	93149742	93180728	-	9423	protein_coding	transmembrane p24 trafficking protein 5 [Source:HGNC Symbol;Acc:HGNC:24251]	-	5205	4696	83	946	15.5646	15.6265	0.44529	3.83355
ENSG00000125046	39.7257	52.9552	1.39158	0	6.25252	0.00014449	0.000894838	SSUH2	3	8619400	8745040	-	6279	protein_coding	ssu-2 homolog (C. elegans) [Source:HGNC Symbol;Acc:HGNC:24809]	-	52	62	1	0	0.233356	0.309616	0.00805125	0
[truncated: 1,753 more rows]
