# Supplementary material for: A single cysteine residue in vimentin regulates long non-coding RNA XIST to suppress epithelial–mesenchymal transition and stemness in breast cancer
Source: eLife. 2025 Jul 21;14:RP104191. doi: 10.7554/eLife.104191 (PMC12279371; doi:10.7554/eLife.104191)
Supplement: Figure 3—figure supplement 4—source data 2. [file elife-104191-fig3-figsupp4-data2.xlsx]

## Sheet: Figure 3-figure supplement 4_so
Downregulated Genes Deduced from the RNAseq Data.
gene_id	MCF7_C328S_1	MCF7_C328S_2	MCF7_VH1	MCF7_VH2	log2FoldChange	pvalue	padj	gene_name	gene_chr	gene_start	gene_end	gene_strand	gene_length	gene_biotype	gene_description	tf_family	MCF7_C328S_1_readcount	MCF7_C328S_2_readcount	MCF7_VH1_readcount	MCF7_VH2_readcount	MCF7_C328S_1_fpkm	MCF7_C328S_2_fpkm	MCF7_VH1_fpkm	MCF7_VH2_fpkm
ENSG00000171345	15.2791	17.0823	128650	58880.3	-12.5017	8.82466e-97	1.04166e-92	KRT19	17	41523617	41528308	-	2336	protein_coding	keratin 19 [Source:HGNC Symbol;Acc:HGNC:6436]	Filament	20	20	92449	56427	0.241248	0.26846	2000.71	922.387
ENSG00000167767	4.58374	4.27058	46513.5	26194.4	-13.0018	4.63707e-79	3.64906e-75	KRT80	12	52168996	52192000	-	4350	protein_coding	keratin 80 [Source:HGNC Symbol;Acc:HGNC:27056]	Filament	6	5	33425	25103	0.0388659	0.0360415	388.451	220.361
ENSG00000170421	508.795	451.828	742698	352763	-10.1552	9.49804e-78	5.60574e-74	KRT8	12	52897187	52949954	-	6881	protein_coding	keratin 8 [Source:HGNC Symbol;Acc:HGNC:6446]	Filament	666	529	533709	338065	2.72728	2.41061	3921.09	1876.06
ENSG00000235123	5.3477	3.41647	11675.3	14788.2	-11.5496	3.73516e-66	1.76359e-62	DSCAM-AS1	21	40383083	40385358	+	1769	antisense	DSCAM antisense RNA 1 [Source:HGNC Symbol;Acc:HGNC:40197]	-	7	4	8390	14172	0.1115	0.0709014	239.766	305.916
ENSG00000160182	10.6954	3.41647	20705.3	13014.3	-11.2047	1.82949e-65	7.19844e-62	TFF1	21	42362282	42366594	-	551	protein_coding	trefoil factor 1 [Source:HGNC Symbol;Acc:HGNC:11755]	-	14	4	14879	12472	0.71595	0.227631	1365.14	864.337
ENSG00000115648	4.58374	5.1247	13897.7	8811.13	-11.1942	9.51281e-63	3.20826e-59	MLPH	2	237485428	237555318	+	7514	protein_coding	melanophilin [Source:HGNC Symbol;Acc:HGNC:29643]	-	6	6	9987	8444	0.0225002	0.0250382	67.192	42.9117
ENSG00000188643	8.40352	5.1247	15164	8119.3	-10.7403	2.89287e-61	8.53685e-58	S100A16	1	153606886	153613145	-	1701	protein_coding	S100 calcium binding protein A16 [Source:HGNC Symbol;Acc:HGNC:20441]	-	11	6	10897	7781	0.182219	0.110604	323.859	174.675
ENSG00000272398	59.5886	67.4752	19401.4	30034.4	-8.60434	3.68962e-61	9.67827e-58	CD24	6	106969831	106975627	-	3097	protein_coding	CD24 molecule [Source:HGNC Symbol;Acc:HGNC:1645]	-	78	79	13942	28783	0.709676	0.79985	227.582	354.89
ENSG00000165140	12.2233	17.0823	29156.4	11065	-10.4259	6.03415e-61	1.42454e-57	FBP1	9	94603133	94640249	-	1668	protein_coding	fructose-bisphosphatase 1 [Source:HGNC Symbol;Acc:HGNC:3606]	-	16	20	20952	10604	0.27029	0.375973	635.014	242.757
ENSG00000039068	119.941	105.91	29099.3	30155.5	-8.03511	6.44062e-60	1.38228e-56	CDH1	16	68737225	68835548	+	6177	protein_coding	cadherin 1 [Source:HGNC Symbol;Acc:HGNC:1748]	Cadherin	157	124	20911	28899	0.71619	0.629458	171.14	178.65
ENSG00000196542	12.9873	10.2494	7316.92	16841.7	-10.019	1.43561e-57	2.82433e-54	SPTSSB	3	161344792	161372880	-	3745	protein_coding	serine palmitoyltransferase small subunit B [Source:HGNC Symbol;Acc:HGNC:24045]	-	17	12	5258	16140	0.12791	0.100474	70.9778	164.57
ENSG00000137801	18.335	17.0823	12346.1	6746.08	-9.07354	4.13529e-56	7.50969e-53	THBS1	15	39581079	39599466	+	9158	protein_coding	thrombospondin 1 [Source:HGNC Symbol;Acc:HGNC:11785]	TSP_C	24	20	8872	6465	0.0738443	0.0684781	48.975	26.9567
ENSG00000168672	24.4466	23.0611	6925.89	8895.65	-8.37902	7.77412e-56	1.31094e-52	FAM84B	8	126552442	126558393	-	5404	protein_coding	family with sequence similarity 84 member B [Source:HGNC Symbol;Acc:HGNC:24166]	-	32	27	4977	8525	0.166856	0.156665	46.5593	60.239
ENSG00000124664	9.16748	7.68705	19316.5	6822.26	-10.5962	1.21456e-55	1.91156e-52	SPDEF	6	34537802	34556333	-	1914	protein_coding	SAM pointed domain containing ETS transcription factor [Source:HGNC Symbol;Acc:HGNC:17257]	Ets	12	9	13881	6538	0.176663	0.147443	366.634	130.437
ENSG00000091831	8.40352	5.97882	6888.32	4880.35	-9.67007	5.70473e-55	8.41733e-52	ESR1	6	151656691	152129619	+	13854	protein_coding	estrogen receptor 1 [Source:HGNC Symbol;Acc:HGNC:3467]	Oest_recep	11	7	4950	4677	0.022373	0.0158433	18.0627	12.8911
ENSG00000144476	8.40352	7.68705	17451.8	6185.74	-10.5193	2.0043e-54	2.78339e-51	ACKR3	2	236567787	236582358	+	2258	protein_coding	atypical chemokine receptor 3 [Source:HGNC Symbol;Acc:HGNC:23692]	7tm_1	11	9	12541	5928	0.13727	0.12498	280.777	100.25
ENSG00000103067	16.0431	15.3741	17970.8	6568.69	-9.60887	1.90961e-52	2.27062e-49	ESRP2	16	68229111	68238102	-	5563	protein_coding	epithelial splicing regulatory protein 2 [Source:HGNC Symbol;Acc:HGNC:26152]	-	21	18	12914	6295	0.106369	0.101458	117.356	43.2101
ENSG00000104413	4.58374	5.97882	4358.42	6075.13	-9.95392	1.9236e-52	2.27062e-49	ESRP1	8	94641074	94707466	+	4875	protein_coding	epithelial splicing regulatory protein 1 [Source:HGNC Symbol;Acc:HGNC:25966]	-	6	7	3132	5822	0.0346803	0.0450242	32.4789	45.6033
ENSG00000079257	17.571	13.6659	4622.82	5942.61	-8.39895	1.46628e-51	1.64838e-48	LXN	3	158645822	158672693	-	1504	protein_coding	latexin [Source:HGNC Symbol;Acc:HGNC:13347]	-	23	16	3322	5695	0.43091	0.333576	111.662	144.592
ENSG00000184292	4.58374	0.854117	13412	7452.52	-11.8701	3.00163e-51	3.22102e-48	TACSTD2	1	58575423	58577773	-	2351	protein_coding	tumor associated calcium signal transducer 2 [Source:HGNC Symbol;Acc:HGNC:11530]	-	6	1	9638	7142	0.0719126	0.0133374	207.247	116.002
ENSG00000065361	49.6572	40.1435	14523.9	9050.08	-8.03517	4.33544e-51	4.42622e-48	ERBB3	12	56076799	56103505	+	9039	protein_coding	erb-b2 receptor tyrosine kinase 3 [Source:HGNC Symbol;Acc:HGNC:3431]	Pkinase_Tyr	65	47	10437	8673	0.202628	0.163042	58.3726	36.6394
ENSG00000111319	6.11165	5.97882	8382.87	4143.65	-10.0164	4.49972e-51	4.42622e-48	SCNN1A	12	6346843	6377730	-	5876	protein_coding	sodium channel epithelial 1 alpha subunit [Source:HGNC Symbol;Acc:HGNC:10599]	-	8	7	6024	3971	0.0383632	0.0373541	51.8271	25.8058
ENSG00000129354	8.40352	13.6659	11536.2	5043.13	-9.55915	5.80449e-51	5.48129e-48	AP1M2	19	10572671	10587315	-	2214	protein_coding	adaptor related protein complex 1 mu 2 subunit [Source:HGNC Symbol;Acc:HGNC:558]	Adap_comp_sub	11	16	8290	4833	0.139998	0.226603	189.291	83.3562
ENSG00000075461	19.8629	38.4352	11184.1	8027.48	-8.36861	2.34143e-50	2.04728e-47	CACNG4	17	66964910	67033398	+	3380	protein_coding	calcium voltage-gated channel auxiliary subunit gamma 4 [Source:HGNC Symbol;Acc:HGNC:1408]	-	26	45	8037	7693	0.216752	0.417463	120.207	86.9116
ENSG00000198910	18.335	35.8729	26545.8	9894.26	-9.39655	3.70389e-50	3.12291e-47	L1CAM	X	153861514	153886174	-	7270	protein_coding	L1 cell adhesion molecule [Source:HGNC Symbol;Acc:HGNC:6470]	fn3	24	42	19076	9482	0.0930215	0.18115	132.65	49.804
ENSG00000138119	84.0352	97.3693	13997.9	17556.5	-7.44292	9.50622e-50	7.73872e-47	MYOF	10	93306429	93482317	-	8473	protein_coding	myoferlin [Source:HGNC Symbol;Acc:HGNC:3656]	C2	110	114	10059	16825	0.365815	0.421881	60.0166	75.8257
ENSG00000064205	4.58374	2.56235	20329.6	5883.13	-11.8286	1.03313e-49	8.13005e-47	WISP2	20	44714844	44728509	+	4981	protein_coding	WNT1 inducible signaling pathway protein 2 [Source:HGNC Symbol;Acc:HGNC:12770]	VWC	6	3	14609	5638	0.0339423	0.0188854	148.271	43.2222
ENSG00000181019	122.997	137.513	20130.6	19821.9	-7.26104	1.56883e-49	1.19474e-46	NQO1	16	69706996	69726951	-	3254	protein_coding	NAD(P)H quinone dehydrogenase 1 [Source:HGNC Symbol;Acc:HGNC:2874]	Flavodoxin_2	161	161	14466	18996	1.39417	1.55143	224.742	222.917
ENSG00000261150	14.5152	8.54117	15254.5	5329.04	-9.79614	2.2842e-49	1.68517e-46	EPPK1	8	143857324	143878464	-	16002	protein_coding	epiplakin 1 [Source:HGNC Symbol;Acc:HGNC:15577]	-	19	10	10962	5107	0.0334569	0.0195951	34.6313	12.1868
ENSG00000166145	24.4466	28.1858	13172.7	6172.17	-8.52271	4.5455e-49	3.25183e-46	SPINT1	15	40844018	40858207	+	3542	protein_coding	serine peptidase inhibitor, Kunitz type 1 [Source:HGNC Symbol;Acc:HGNC:11246]	Kunitz_BPTI	32	33	9466	5915	0.25457	0.292138	135.105	63.7683
ENSG00000151892	77.1596	93.0987	14887.1	12849.4	-7.34848	8.85585e-49	6.14908e-46	GFRA1	10	116056925	116273467	-	9678	protein_coding	GDNF family receptor alpha 1 [Source:HGNC Symbol;Acc:HGNC:4243]	-	101	109	10698	12314	0.294064	0.353153	55.8818	48.5861
ENSG00000159176	65.7003	66.6211	16911.9	10299.1	-7.68401	2.5785e-48	1.73923e-45	CSRP1	1	201483530	201509456	-	10318	protein_coding	cysteine and glycine rich protein 1 [Source:HGNC Symbol;Acc:HGNC:2469]	LIM	86	78	12153	9870	0.23486	0.23704	59.5445	36.5275
ENSG00000165215	2.29187	1.70823	35826.2	8418.78	-13.4255	1.82631e-47	1.17807e-44	CLDN3	7	73768997	73770270	-	1274	protein_coding	claudin 3 [Source:HGNC Symbol;Acc:HGNC:2045]	-	3	2	25745	8068	0.0663526	0.0492247	1021.59	241.822
ENSG00000184363	1.52791	5.1247	12719	5056.69	-11.4093	1.84635e-47	1.17807e-44	PKP3	11	392614	404908	+	3787	protein_coding	plakophilin 3 [Source:HGNC Symbol;Acc:HGNC:9025]	Arm	2	6	9140	4846	0.0148813	0.0496797	122.013	48.8638
ENSG00000129514	87.091	97.3693	14682.5	12469.6	-7.20191	2.05199e-47	1.27482e-44	FOXA1	14	37589984	37596059	-	3982	protein_coding	forkhead box A1 [Source:HGNC Symbol;Acc:HGNC:5021]	Fork_head	114	114	10551	11950	0.806696	0.89769	133.951	114.595
ENSG00000064787	9.16748	5.1247	3352.31	3536.35	-8.90221	3.08202e-47	1.86565e-44	BCAS1	20	53936777	54070594	-	8186	protein_coding	breast carcinoma amplified sequence 1 [Source:HGNC Symbol;Acc:HGNC:974]	-	12	6	2409	3389	0.0413063	0.0229828	14.8771	15.8088
ENSG00000149418	3.81978	10.2494	15120.9	4662.26	-10.4711	1.19739e-46	7.06698e-44	ST14	11	130159562	130210376	+	4350	protein_coding	suppression of tumorigenicity 14 [Source:HGNC Symbol;Acc:HGNC:11344]	Trypsin	5	12	10866	4468	0.0323882	0.0864997	126.28	39.2214
ENSG00000163435	5.3477	7.68705	5613.63	3016.69	-9.37751	1.52423e-46	8.77659e-44	ELF3	1	202007945	202017188	+	7191	protein_coding	E74 like ETS transcription factor 3 [Source:HGNC Symbol;Acc:HGNC:3318]	Ets	7	9	4034	2891	0.0274293	0.0392442	28.3596	15.3517
ENSG00000181885	3.81978	8.54117	3765.61	3036.52	-9.11937	1.82097e-45	1.02356e-42	CLDN7	17	7259903	7263983	-	2492	protein_coding	claudin 7 [Source:HGNC Symbol;Acc:HGNC:2049]	-	5	10	2706	2910	0.0565364	0.125827	54.8951	44.5906
ENSG00000107485	254.398	257.943	67213.3	33340.2	-7.61664	2.44512e-45	1.34243e-42	GATA3	10	8045378	8075203	+	3436	protein_coding	GATA binding protein 3 [Source:HGNC Symbol;Acc:HGNC:4172]	GATA	333	302	48300	31951	2.73085	2.75598	710.637	355.083
ENSG00000189143	38.9618	44.4141	38850.1	10033	-9.19594	3.0256e-45	1.62337e-42	CLDN4	7	73799542	73832693	+	4702	protein_coding	claudin 4 [Source:HGNC Symbol;Acc:HGNC:2046]	-	51	52	27918	9615	0.305629	0.346771	300.162	78.0846
ENSG00000155066	19.8629	17.0823	8355.04	3870.26	-8.36878	5.42182e-45	2.84441e-42	PROM2	2	95274453	95291308	+	6063	protein_coding	prominin 2 [Source:HGNC Symbol;Acc:HGNC:20685]	Prominin	26	20	6004	3709	0.120835	0.103434	50.0618	23.3597
ENSG00000188064	7.63957	5.97882	5297.74	2657.74	-9.18573	1.08758e-44	5.58164e-42	WNT7B	22	45920362	45977129	-	5051	protein_coding	Wnt family member 7B [Source:HGNC Symbol;Acc:HGNC:12787]	wnt	10	7	3807	2547	0.0557865	0.0434554	38.103	19.2553
ENSG00000132698	6.11165	10.2494	8355.04	3170.09	-9.4677	1.60543e-44	7.89604e-42	RAB25	1	156061160	156070514	+	1699	protein_coding	RAB25, member RAS oncogene family [Source:HGNC Symbol;Acc:HGNC:18238]	Ras	8	12	6004	3038	0.132679	0.221468	178.649	68.28
ENSG00000118898	19.0989	15.3741	8135.17	3642.78	-8.41424	3.14172e-44	1.51367e-41	PPL	16	4882507	4960741	-	7686	protein_coding	periplakin [Source:HGNC Symbol;Acc:HGNC:9273]	-	25	18	5846	3491	0.0916529	0.0734336	38.4514	17.344
ENSG00000162981	3.05583	6.83293	4028.62	2761.04	-9.44009	4.04796e-44	1.91129e-41	FAM84A	2	14632686	14650814	+	8384	protein_coding	family with sequence similarity 84 member A [Source:HGNC Symbol;Acc:HGNC:20743]	-	4	8	2895	2646	0.0134436	0.02992	17.4563	12.0514
ENSG00000169871	2.29187	7.68705	4333.38	2991.65	-9.54289	1.31505e-43	6.0874e-41	TRIM56	7	101085439	101097967	+	11173	protein_coding	tripartite motif containing 56 [Source:HGNC Symbol;Acc:HGNC:19028]	zf-B_box	3	9	3114	2867	0.00756585	0.0252578	14.0897	9.79843
ENSG00000111057	988.56	916.467	247939	113887	-7.56932	1.51027e-43	6.85661e-41	KRT18	12	52948871	52952901	+	3218	protein_coding	keratin 18 [Source:HGNC Symbol;Acc:HGNC:6430]	Filament	1294	1073	178171	109142	11.3306	10.4553	2799.01	1295.1
ENSG00000052344	3.81978	2.56235	6412.4	2956.17	-10.5097	6.07621e-43	2.65643e-40	PRSS8	16	31131433	31135762	-	3010	protein_coding	serine protease 8 [Source:HGNC Symbol;Acc:HGNC:9491]	Trypsin	5	3	4608	2833	0.0468069	0.031252	77.3926	35.9401
ENSG00000182809	35.906	32.4564	25054	6763.82	-8.86192	1.73913e-42	7.46496e-40	CRIP2	14	105472962	105480170	+	4837	protein_coding	cysteine rich protein 2 [Source:HGNC Symbol;Acc:HGNC:2361]	LIM	47	38	18004	6482	0.273797	0.246337	188.168	51.1719
ENSG00000089356	2.29187	4.27058	4011.92	2719.3	-10.0181	2.88457e-42	1.21605e-39	FXYD3	19	35115879	35124324	+	3334	protein_coding	FXYD domain containing ion transport regulator 3 [Source:HGNC Symbol;Acc:HGNC:4027]	-	3	5	2883	2606	0.0253549	0.0470248	43.7152	29.8475
ENSG00000205426	0	1.70823	74583.1	29331.1	-15.9626	1.21027e-41	4.92621e-39	KRT81	12	52285913	52291534	-	1929	protein_coding	keratin 81 [Source:HGNC Symbol;Acc:HGNC:6458]	Filament	0	2	53596	28109	0	0.0325103	1404.6	556.432
ENSG00000205336	3.05583	0.854117	9433.51	4270.96	-11.7431	1.74786e-41	6.9938e-39	ADGRG1	16	57610652	57665580	+	8659	protein_coding	adhesion G protein-coupled receptor G1 [Source:HGNC Symbol;Acc:HGNC:4512]	7tm_2	4	1	6779	4093	0.0130166	0.00362122	39.5778	18.0498
ENSG00000099812	3.81978	3.41647	6089.55	2422.96	-10.1974	3.73114e-41	1.46808e-38	MISP	19	751126	764318	+	2966	protein_coding	mitotic spindle positioning [Source:HGNC Symbol;Acc:HGNC:27000]	-	5	4	4376	2322	0.0475013	0.0422874	74.5864	29.8944
ENSG00000107984	39.7257	40.1435	4597.78	4584	-6.84505	5.30757e-41	2.05412e-38	DKK1	10	52314296	52318042	+	2206	protein_coding	dickkopf WNT signaling pathway inhibitor 1 [Source:HGNC Symbol;Acc:HGNC:2891]	-	52	47	3304	4393	0.664208	0.668059	75.7161	76.0422
ENSG00000137501	51.1851	46.9764	5790.36	12693.9	-7.55664	1.64636e-40	6.16939e-38	SYTL2	11	85694224	85811159	-	11258	protein_coding	synaptotagmin like 2 [Source:HGNC Symbol;Acc:HGNC:15585]	C2	67	55	4161	12165	0.167695	0.153188	18.6849	41.2619
ENSG00000128564	12.2233	11.1035	3377.36	2081.74	-7.86904	1.87e-40	6.89796e-38	VGF	7	101162509	101165593	-	2704	protein_coding	VGF nerve growth factor inducible [Source:HGNC Symbol;Acc:HGNC:12684]	-	16	13	2427	1995	0.166732	0.150751	45.375	28.1731
ENSG00000116299	5.3477	8.54117	3975.74	2002.43	-8.75758	2.63721e-40	9.57836e-38	KIAA1324	1	109113679	109206781	+	9300	protein_coding	KIAA1324 [Source:HGNC Symbol;Acc:HGNC:29618]	-	7	10	2857	1919	0.0212091	0.0337163	15.5303	7.87936
ENSG00000166446	22.9187	40.9976	4494.8	5073.39	-7.22967	3.1292e-40	1.11931e-37	CDYL2	16	80597906	80804329	-	8557	protein_coding	chromodomain Y like 2 [Source:HGNC Symbol;Acc:HGNC:23030]	ECH	30	48	3230	4862	0.0987884	0.17589	19.0825	21.6966
ENSG00000062038	35.906	43.5599	8751.64	4576.69	-7.39085	3.29729e-40	1.16183e-37	CDH3	16	68636189	68722616	+	6236	protein_coding	cadherin 3 [Source:HGNC Symbol;Acc:HGNC:1762]	Cadherin	47	51	6289	4386	0.212372	0.256441	50.9834	26.8572
ENSG00000164855	15.2791	15.3741	6943.98	2702.61	-8.29775	3.52135e-40	1.22253e-37	TMEM184A	7	1542235	1560821	-	7805	protein_coding	transmembrane protein 184A [Source:HGNC Symbol;Acc:HGNC:28797]	-	20	18	4990	2590	0.0722044	0.072314	32.3207	12.6714
ENSG00000102007	29.0303	30.7482	6278.8	3465.39	-7.34905	7.51254e-40	2.57038e-37	PLP2	X	49171926	49175239	+	1279	protein_coding	proteolipid protein 2 [Source:HGNC Symbol;Acc:HGNC:9087]	-	38	36	4512	3321	0.837181	0.882581	178.341	99.151
ENSG00000124126	230.715	236.59	59282.7	23892.5	-7.47565	1.65089e-39	5.56773e-37	PREX1	20	48624252	48827883	-	7393	protein_coding	phosphatidylinositol-3,4,5-trisphosphate dependent Rac exchange factor 1 [Source:HGNC Symbol;Acc:HGNC:32594]	RhoGEF	302	277	42601	22897	1.15105	1.17485	291.308	118.265
ENSG00000130513	22.9187	21.3529	8217.27	3152.35	-8.00394	4.09772e-39	1.36252e-36	GDF15	19	18374731	18389176	+	2087	protein_coding	growth differentiation factor 15 [Source:HGNC Symbol;Acc:HGNC:30142]	-	30	25	5905	3021	0.405047	0.375613	143.038	55.2748
ENSG00000013588	68.7561	81.1411	7652.29	6634.43	-6.5751	4.2019e-39	1.37775e-36	GPRC5A	12	12890782	12917937	+	8440	protein_coding	G protein-coupled receptor class C group 5 member A [Source:HGNC Symbol;Acc:HGNC:9836]	7tm_3	90	95	5499	6358	0.300474	0.352942	32.9378	28.7658
ENSG00000173227	40.4897	19.6447	11991.2	4801.04	-8.1216	1.13981e-38	3.6861e-36	SYT12	11	67006778	67050863	+	10830	protein_coding	synaptotagmin 12 [Source:HGNC Symbol;Acc:HGNC:18381]	C2	53	23	8617	4601	0.137897	0.066592	40.2236	16.2227
ENSG00000106484	6.87561	8.54117	1665.72	2867.48	-8.20384	1.48622e-38	4.74144e-36	MEST	7	130486171	130506465	+	4794	protein_coding	mesoderm specific transcript [Source:HGNC Symbol;Acc:HGNC:7028]	Abhydrolase_1	9	10	1197	2748	0.0528994	0.065407	12.6226	21.8886
ENSG00000119888	80.9794	91.3905	7105.4	10905.4	-6.7076	2.45881e-38	7.63784e-36	EPCAM	2	47345158	47387601	+	2519	protein_coding	epithelial cell adhesion molecule [Source:HGNC Symbol;Acc:HGNC:11529]	-	106	107	5106	10451	1.18573	1.33192	102.472	158.427
ENSG00000115919	11.4593	9.39528	1825.75	3663.65	-8.0376	3.15516e-38	9.67363e-36	KYNU	2	142877498	143055832	+	17600	protein_coding	kynureninase [Source:HGNC Symbol;Acc:HGNC:6469]	Aminotran_5	15	11	1312	3511	0.0240151	0.0195976	3.76856	7.61758
ENSG00000092929	11.4593	18.7906	8328.6	2668.17	-8.51021	8.43179e-38	2.55202e-35	UNC13D	17	75827225	75844717	-	7752	protein_coding	unc-13 homolog D [Source:HGNC Symbol;Acc:HGNC:23147]	C2	15	22	5985	2557	0.0545235	0.088988	39.0305	12.5955
ENSG00000049283	16.0431	23.0611	5978.22	2603.48	-7.78068	1.32795e-37	3.91877e-35	EPN3	17	50532543	50543750	+	4642	protein_coding	epsin 3 [Source:HGNC Symbol;Acc:HGNC:18235]	-	21	27	4296	2495	0.127474	0.182382	46.7857	20.5241
ENSG00000143320	105.426	76.0164	15482.7	8129.74	-7.02307	1.71017e-37	4.97272e-35	CRABP2	1	156699606	156705816	-	1100	protein_coding	cellular retinoic acid binding protein 2 [Source:HGNC Symbol;Acc:HGNC:2339]	-	138	89	11126	7791	3.53503	2.537	511.329	270.458
ENSG00000184012	2.29187	1.70823	3914.51	2683.83	-10.679	1.72722e-37	4.97272e-35	TMPRSS2	21	41464551	41531116	-	6117	protein_coding	transmembrane serine protease 2 [Source:HGNC Symbol;Acc:HGNC:11876]	Trypsin	3	2	2813	2572	0.0138194	0.0102521	23.248	16.0558
ENSG00000141854	12.9873	11.1035	2211.22	1626.78	-7.3134	1.3313e-36	3.69758e-34	MISP3	19	14072536	14075062	+	2354	protein_coding	MISP family member 3 [Source:HGNC Symbol;Acc:HGNC:26963]	-	17	13	1589	1559	0.203493	0.173165	34.1249	25.2894
ENSG00000119411	8.40352	14.52	4088.46	1852.17	-8.02408	1.79654e-36	4.86825e-34	BSPRY	9	113349541	113371233	+	2339	protein_coding	B-box and SPRY domain containing [Source:HGNC Symbol;Acc:HGNC:18232]	SPRY	11	17	2938	1775	0.132516	0.227898	63.5002	28.9779
novel.120	6.11165	6.83293	2907.01	1426.43	-8.3888	1.81466e-36	4.86825e-34	-	20	63477453	63486941	+	9489	-	-	-	8	8	2089	1367	0.0237561	0.0264358	11.1294	5.50107
ENSG00000099337	9.93143	10.2494	2347.59	1475.48	-7.56585	3.22414e-36	8.45728e-34	KCNK6	19	38319844	38332076	+	6169	protein_coding	potassium two pore domain channel subfamily K member 6 [Source:HGNC Symbol;Acc:HGNC:6281]	Ion_trans_2	13	12	1687	1414	0.0593793	0.0609943	13.8246	8.75253
ENSG00000129993	37.4339	29.8941	5747.22	3085.56	-7.03406	3.4131e-36	8.75831e-34	CBFA2T3	16	88874858	88977204	-	5972	protein_coding	CBFA2/RUNX1 translocation partner 3 [Source:HGNC Symbol;Acc:HGNC:1537]	zf-MYND	49	35	4130	2957	0.231197	0.183768	34.961	18.9073
ENSG00000189334	3.05583	0	4823.21	3478.96	-11.3462	7.76167e-36	1.92881e-33	S100A14	1	153614255	153616986	-	1277	protein_coding	S100 calcium binding protein A14 [Source:HGNC Symbol;Acc:HGNC:18901]	-	4	0	3466	3334	0.0882624	0	137.212	99.695
ENSG00000146674	3.81978	3.41647	1764.52	1500.52	-8.8147	1.03553e-35	2.54655e-33	IGFBP3	7	45912245	45921874	-	4571	protein_coding	insulin like growth factor binding protein 3 [Source:HGNC Symbol;Acc:HGNC:5472]	-	5	4	1268	1438	0.0308223	0.0274392	14.0237	12.0129
ENSG00000196917	4.58374	3.41647	1443.07	1597.56	-8.56303	2.40352e-35	5.84973e-33	HCAR1	12	122726076	122730843	-	4768	protein_coding	hydroxycarboxylic acid receptor 1 [Source:HGNC Symbol;Acc:HGNC:4532]	7tm_1	6	4	1037	1531	0.0354586	0.0263055	10.995	12.2613
ENSG00000175793	2.29187	0.854117	7314.14	2769.39	-11.619	5.9945e-35	1.42948e-32	SFN	1	26863138	26864457	+	1320	protein_coding	stratifin [Source:HGNC Symbol;Acc:HGNC:10773]	-	3	1	5256	2654	0.0640404	0.0237547	201.296	76.7761
ENSG00000100311	3.05583	5.1247	1960.73	1324.17	-8.66131	6.99029e-35	1.65027e-32	PDGFB	22	39223359	39244751	-	3761	protein_coding	platelet derived growth factor subunit B [Source:HGNC Symbol;Acc:HGNC:8800]	-	4	6	1409	1269	0.0299684	0.0500231	18.9392	12.8842
ENSG00000072858	19.0989	14.52	1967.69	1809.39	-6.80874	8.83706e-35	2.0656e-32	SIDT1	3	113532296	113629578	+	8060	protein_coding	SID1 transmembrane family member 1 [Source:HGNC Symbol;Acc:HGNC:25967]	-	25	17	1414	1734	0.0874	0.0661358	8.86887	8.2151
ENSG00000180573	29.7943	42.7058	3455.29	3020.87	-6.48318	1.19012e-34	2.75453e-32	HIST1H2AC	6	26124145	26139116	+	1668	protein_coding	histone cluster 1 H2A family member c [Source:HGNC Symbol;Acc:HGNC:4733]	Histone	39	50	2483	2895	0.658832	0.939932	75.2548	66.2752
ENSG00000124249	8.40352	13.6659	2194.52	1451.48	-7.37464	1.65089e-34	3.71184e-32	KCNK15	20	44745780	44752313	+	2599	protein_coding	potassium two pore domain channel subfamily K member 15 [Source:HGNC Symbol;Acc:HGNC:13814]	Ion_trans_2	11	16	1577	1391	0.119259	0.193035	30.6746	20.4371
ENSG00000143850	25.2106	32.4564	5581.62	2535.65	-7.13854	3.55292e-34	7.83901e-32	PLEKHA6	1	204218851	204377665	-	8251	protein_coding	pleckstrin homology domain containing A6 [Source:HGNC Symbol;Acc:HGNC:17053]	PH	33	38	4011	2430	0.112697	0.144411	24.5754	11.246
ENSG00000168453	18.335	16.2282	5617.8	1925.22	-7.76853	5.02649e-34	1.08867e-31	HR	8	22114415	22133384	-	8784	protein_coding	HR, lysine demethylase and nuclear receptor corepressor [Source:HGNC Symbol;Acc:HGNC:5172]	JmjC	24	19	4037	1845	0.0769884	0.0678241	23.2338	8.02053
ENSG00000111859	25.9745	16.2282	3103.22	2011.83	-6.91705	5.14238e-34	1.10365e-31	NEDD9	6	11183298	11382348	-	10359	protein_coding	neural precursor cell expressed, developmentally down-regulated 9 [Source:HGNC Symbol;Acc:HGNC:7733]	-	34	19	2230	1928	0.0924842	0.057512	10.8828	7.10703
ENSG00000178467	6.11165	5.1247	3638.98	1250.09	-8.7618	5.29291e-34	1.12572e-31	P4HTM	3	48989886	49007154	+	7641	protein_coding	prolyl 4-hydroxylase, transmembrane [Source:HGNC Symbol;Acc:HGNC:28858]	-	8	6	2615	1198	0.0295016	0.024622	17.3012	5.98695
ENSG00000170442	2.29187	6.83293	4757.81	1468.17	-9.43315	5.75276e-34	1.2126e-31	KRT86	12	52249300	52309163	+	2394	protein_coding	keratin 86 [Source:HGNC Symbol;Acc:HGNC:6463]	Filament	3	8	3419	1407	0.0353105	0.104782	72.1986	22.4424
ENSG00000006756	4.58374	8.54117	2131.9	1230.26	-8.01182	6.39348e-34	1.32401e-31	ARSD	X	2903970	2929351	-	7030	protein_coding	arylsulfatase D [Source:HGNC Symbol;Acc:HGNC:717]	Sulfatase	6	10	1532	1179	0.0240493	0.0446033	11.0168	6.40409
ENSG00000074410	289.54	249.402	19736.8	15235.8	-6.01979	7.85111e-34	1.61173e-31	CA12	15	63321378	63382161	-	7313	protein_coding	carbonic anhydrase 12 [Source:HGNC Symbol;Acc:HGNC:1371]	-	379	292	14183	14601	1.46033	1.25202	98.0452	76.2405
ENSG00000162105	17.571	23.9153	2524.32	1810.43	-6.7099	1.33806e-33	2.69991e-31	SHANK2	11	70467856	71252577	-	18775	protein_coding	SH3 and multiple ankyrin repeat domains 2 [Source:HGNC Symbol;Acc:HGNC:14295]	SAM_1	23	28	1814	1735	0.0345187	0.0467628	4.8844	3.52873
ENSG00000163083	31.3222	52.1011	9791.15	3733.56	-7.34289	2.91927e-33	5.84053e-31	INHBB	2	120346143	120351808	+	3204	protein_coding	inhibin beta B subunit [Source:HGNC Symbol;Acc:HGNC:6067]	TGFb_propeptide	41	61	7036	3578	0.360577	0.59698	111.016	42.6429
ENSG00000105289	25.9745	26.4776	6824.3	2368.69	-7.45335	3.31437e-33	6.57526e-31	TJP3	19	3708109	3750813	+	4217	protein_coding	tight junction protein 3 [Source:HGNC Symbol;Acc:HGNC:11829]	PDZ	34	31	4904	2270	0.227186	0.230505	58.7896	20.5552
ENSG00000196208	301.763	281.858	26721.1	16007	-6.19392	3.91394e-33	7.70002e-31	GREB1	2	11482341	11642788	+	12361	protein_coding	growth regulation by estrogen in breast cancer 1 [Source:HGNC Symbol;Acc:HGNC:24885]	-	395	330	19202	15340	0.90043	0.837111	78.532	47.3882
ENSG00000189223	6.11165	7.68705	1413.84	1115.48	-7.52226	4.14276e-33	8.08283e-31	PAX8-AS1	2	113211522	113276581	+	17274	processed_transcript	PAX8 antisense RNA 1 [Source:HGNC Symbol;Acc:HGNC:49271]	-	8	9	1016	1069	0.0130498	0.016337	2.97341	2.36311
ENSG00000006747	37.4339	42.7058	2609.21	3608.35	-6.27854	8.48388e-33	1.61522e-30	SCIN	7	12570577	12660179	+	11623	protein_coding	scinderin [Source:HGNC Symbol;Acc:HGNC:21695]	-	49	50	1875	3458	0.118791	0.134888	8.15524	11.3607
ENSG00000180543	2.29187	0	4233.18	4202.09	-11.78	9.01587e-33	1.68926e-30	TSPYL5	8	97273474	97277964	-	4491	protein_coding	TSPY like 5 [Source:HGNC Symbol;Acc:HGNC:29367]	-	3	0	3042	4027	0.0188228	0	34.2428	34.2403
ENSG00000095261	12.2233	7.68705	1280.25	3014.61	-7.74717	1.23327e-32	2.29252e-30	PSMD5	9	120815496	120842984	-	4432	protein_coding	proteasome 26S subunit, non-ATPase 5 [Source:HGNC Symbol;Acc:HGNC:9563]	-	16	9	920	2889	0.101725	0.0636745	10.494	24.8912
ENSG00000132746	2.29187	1.70823	3850.5	1579.83	-10.3983	1.35436e-32	2.49796e-30	ALDH3B2	11	67662162	67681200	-	3235	protein_coding	aldehyde dehydrogenase 3 family member B2 [Source:HGNC Symbol;Acc:HGNC:411]	Aldedh	3	2	2767	1514	0.0261308	0.0193856	43.2403	17.8711
ENSG00000076242	1.52791	3.41647	1518.21	1623.65	-9.33381	2.01161e-32	3.68141e-30	MLH1	3	36993332	37050918	+	3532	protein_coding	mutL homolog 1 [Source:HGNC Symbol;Acc:HGNC:7127]	-	2	4	1091	1556	0.0159557	0.0355109	15.6156	16.8224
ENSG00000197308	4.58374	3.41647	983.846	1731.13	-8.40024	9.58335e-32	1.71397e-29	GATA3-AS1	10	8050450	8053484	-	2372	lincRNA	GATA3 antisense RNA 1 [Source:HGNC Symbol;Acc:HGNC:33786]	-	6	4	707	1659	0.0712759	0.0528771	15.0681	26.7073
ENSG00000081923	30.5583	29.8941	1923.16	2681.74	-6.25121	1.63252e-31	2.87615e-29	ATP8B1	18	57646426	57803101	-	6782	protein_coding	ATPase phospholipid transporting 8B1 [Source:HGNC Symbol;Acc:HGNC:3706]	E1-E2_ATPase	40	35	1382	2570	0.166191	0.16182	10.3016	14.4702
ENSG00000184678	48.8932	42.7058	2646.78	3810.78	-6.13895	2.01443e-31	3.52271e-29	HIST2H2BE	1	149884459	149886652	-	2194	protein_coding	histone cluster 2 H2B family member e [Source:HGNC Symbol;Acc:HGNC:4760]	Histone	64	50	1902	3652	0.821958	0.714588	43.8256	63.5613
ENSG00000226752	4.58374	5.97882	930.966	1498.43	-7.85139	2.14337e-31	3.72065e-29	CUTALP	9	120824828	120854385	+	7224	transcribed_unitary_pseudogene	cutA divalent cation tolerance homolog-like, pseudogene [Source:HGNC Symbol;Acc:HGNC:27367]	-	6	7	669	1436	0.0234035	0.0303839	4.68168	7.59059
ENSG00000167861	88.619	88.8281	21527.7	6176.35	-7.28651	2.39421e-31	4.12573e-29	HID1	17	74950743	74973166	-	6196	protein_coding	HID1 domain containing [Source:HGNC Symbol;Acc:HGNC:15736]	-	116	104	15470	5919	0.527537	0.526314	126.221	36.4784
ENSG00000141753	169.598	144.346	21981.4	9085.56	-6.62847	2.50122e-31	4.27889e-29	IGFBP4	17	40443461	40457731	+	2200	protein_coding	insulin like growth factor binding protein 4 [Source:HGNC Symbol;Acc:HGNC:5473]	-	222	169	15796	8707	2.84339	2.40872	362.976	151.128
ENSG00000162777	4.58374	3.41647	1142.49	990.261	-8.05125	5.60916e-31	9.39157e-29	DENND2D	1	111187174	111204535	-	5515	protein_coding	DENN domain containing 2D [Source:HGNC Symbol;Acc:HGNC:26192]	DENN	6	4	821	949	0.0306558	0.0227424	7.52578	6.57082
ENSG00000131981	79.4515	78.5787	4220.66	4290.78	-5.7511	8.48639e-31	1.3817e-28	LGALS3	14	55124110	55145413	+	2397	protein_coding	galectin 3 [Source:HGNC Symbol;Acc:HGNC:6563]	-	104	92	3033	4112	1.22256	1.20349	63.9673	65.5064
ENSG00000106541	3.81978	1.70823	1054.82	1639.3	-8.90876	1.25387e-30	2.02749e-28	AGR2	7	16791811	16833433	-	2845	protein_coding	anterior gradient 2, protein disulphide isomerase family member [Source:HGNC Symbol;Acc:HGNC:328]	-	5	2	758	1571	0.0495215	0.022043	13.4692	21.0859
ENSG00000159166	2.29187	0	4011.92	2798.61	-11.4719	1.27746e-30	2.05158e-28	LAD1	1	201373244	201399915	-	3482	protein_coding	ladinin 1 [Source:HGNC Symbol;Acc:HGNC:6472]	-	3	0	2883	2682	0.0242772	0	41.8571	29.4123
ENSG00000118640	38.9618	37.5811	3715.52	2174.61	-6.26552	1.64342e-30	2.62147e-28	VAMP8	2	85561562	85582031	+	990	protein_coding	vesicle associated membrane protein 8 [Source:HGNC Symbol;Acc:HGNC:12647]	-	51	44	2670	2084	1.45158	1.39361	136.342	80.3825
ENSG00000103196	23.6827	17.0823	1779.83	1494.26	-6.3244	1.77563e-30	2.81336e-28	CRISPLD2	16	84819984	84920768	+	7965	protein_coding	cysteine rich secretory protein LCCL domain containing 2 [Source:HGNC Symbol;Acc:HGNC:25248]	LCCL	31	20	1279	1432	0.109669	0.0787348	8.1178	6.86525
ENSG00000113430	5.3477	11.9576	1589.18	1062.26	-7.27123	2.68123e-30	4.2199e-28	IRX4	5	1877413	1887236	-	2815	protein_coding	iroquois homeobox 4 [Source:HGNC Symbol;Acc:HGNC:6129]	Coprinus_mating	7	14	1142	1018	0.070069	0.155945	20.5089	13.8092
ENSG00000170468	0.763957	3.41647	1880.02	1306.43	-9.61183	4.99899e-30	7.81563e-28	RIOX1	14	73490964	73493392	+	2429	protein_coding	ribosomal oxygenase 1 [Source:HGNC Symbol;Acc:HGNC:20968]	Cupin_4	1	4	1351	1252	0.0116006	0.0516363	28.1178	19.6823
ENSG00000064270	38.1978	15.3741	4027.23	2330.09	-6.88529	6.43929e-30	1.00012e-27	ATP2C2	16	84368527	84464187	+	7352	protein_coding	ATPase secretory pathway Ca2+ transporting 2 [Source:HGNC Symbol;Acc:HGNC:29103]	E1-E2_ATPase	50	18	2894	2233	0.191633	0.0767697	19.8997	11.598
ENSG00000130844	14.5152	12.8117	1100.74	1297.04	-6.45377	8.8697e-30	1.3686e-27	ZNF331	19	53520981	53580269	+	7728	protein_coding	zinc finger protein 331 [Source:HGNC Symbol;Acc:HGNC:15489]	KRAB	19	15	791	1243	0.0692776	0.0608621	5.17444	6.1419
ENSG00000112297	58.8247	69.1834	3051.73	3990.26	-5.78237	2.24832e-29	3.35939e-27	CRYBG1	6	106360808	106571978	+	10374	protein_coding	crystallin beta-gamma domain containing 1 [Source:HGNC Symbol;Acc:HGNC:356]	Crystall	77	81	2193	3824	0.209147	0.244828	10.6868	14.0757
ENSG00000167183	12.9873	11.1035	1280.25	990.261	-6.55603	2.26486e-29	3.36282e-27	PRR15L	17	47951967	47957878	-	1519	protein_coding	proline rich 15 like [Source:HGNC Symbol;Acc:HGNC:28149]	-	17	13	920	949	0.315353	0.268354	30.6185	23.8565
ENSG00000132470	129.873	134.096	28464.7	7528.69	-7.09122	5.83302e-29	8.60663e-27	ITGB4	17	75721328	75757818	+	6761	protein_coding	integrin subunit beta 4 [Source:HGNC Symbol;Acc:HGNC:6158]	fn3	170	157	20455	7215	0.708507	0.728134	152.947	40.7497
ENSG00000237330	1.52791	1.70823	3288.3	1264.7	-10.4614	7.46753e-29	1.09499e-26	RNF223	1	1070966	1074307	-	1902	protein_coding	ring finger protein 223 [Source:HGNC Symbol;Acc:HGNC:40020]	-	2	2	2363	1212	0.0296296	0.0329718	62.8068	24.3327
ENSG00000176046	8.40352	8.54117	997.762	846.261	-6.76598	9.92238e-29	1.41968e-26	NUPR1	16	28532708	28539174	-	5674	protein_coding	nuclear protein 1, transcriptional regulator [Source:HGNC Symbol;Acc:HGNC:29990]	-	11	10	717	811	0.0546273	0.0552628	6.38827	5.45796
ENSG00000176788	113.066	76.8705	4433.57	6812.87	-5.88695	1.59435e-28	2.25335e-26	BASP1	5	17065598	17276843	+	2217	protein_coding	brain abundant membrane attached signal protein 1 [Source:HGNC Symbol;Acc:HGNC:957]	-	148	90	3186	6529	1.88106	1.27291	72.6497	112.455
ENSG00000169583	5.3477	5.1247	2659.31	759.652	-8.34965	1.60353e-28	2.25335e-26	CLIC3	9	136994635	136996803	-	1177	protein_coding	chloride intracellular channel 3 [Source:HGNC Symbol;Acc:HGNC:2064]	-	7	6	1911	728	0.167582	0.159844	82.0801	23.6186
ENSG00000088002	16.807	21.3529	4043.93	1324.17	-7.13778	1.83946e-28	2.55447e-26	SULT2B1	19	48552075	48599425	+	2822	protein_coding	sulfotransferase family 2B member 1 [Source:HGNC Symbol;Acc:HGNC:11459]	Sulfotransfer_1	22	25	2906	1269	0.219671	0.277783	52.0586	17.1713
ENSG00000215845	2.29187	5.1247	833.556	990.261	-7.96114	2.45424e-28	3.38829e-26	TSTD1	1	161037631	161038990	-	1210	protein_coding	thiosulfate sulfurtransferase like domain containing 1 [Source:HGNC Symbol;Acc:HGNC:35410]	Rhodanese	3	6	599	949	0.0698622	0.155485	25.0262	29.9488
ENSG00000069399	60.3526	46.9764	6480.58	2703.65	-6.41802	4.02494e-28	5.49254e-26	BCL3	19	44747705	44760044	+	3242	protein_coding	B cell CLL/lymphoma 3 [Source:HGNC Symbol;Acc:HGNC:998]	-	79	55	4657	2591	0.686626	0.531952	72.6184	30.5178
ENSG00000108846	0.763957	1.70823	4091.24	1621.56	-11.1986	8.02464e-28	1.0764e-25	ABCC3	17	50634777	50692252	+	9614	protein_coding	ATP binding cassette subfamily C member 3 [Source:HGNC Symbol;Acc:HGNC:54]	ABC_membrane	1	2	2940	1554	0.00293091	0.00652302	15.4596	6.17228
ENSG00000143217	12.9873	11.9576	2056.75	891.13	-6.8834	9.95637e-28	1.32797e-25	NECTIN4	1	161070995	161089599	-	3502	protein_coding	nectin cell adhesion molecule 4 [Source:HGNC Symbol;Acc:HGNC:19688]	V-set	17	14	1478	854	0.136785	0.125353	21.336	9.31195
ENSG00000147676	0	1.70823	3488.69	9222.26	-12.9312	1.00996e-27	1.3395e-25	MAL2	8	119165034	119245673	+	3430	protein_coding	mal, T cell differentiation protein 2 (gene/pseudogene) [Source:HGNC Symbol;Acc:HGNC:13634]	-	0	2	2507	8838	0	0.0182835	36.95	98.3918
ENSG00000185101	4.58374	5.97882	1756.17	681.391	-7.85482	1.19518e-27	1.5763e-25	ANO9	11	417933	442011	-	6207	protein_coding	anoctamin 9 [Source:HGNC Symbol;Acc:HGNC:20679]	-	6	7	1262	653	0.027238	0.0353622	10.2785	4.01726
ENSG00000145632	93.9667	111.889	4121.86	4831.3	-5.44317	2.03023e-27	2.66276e-25	PLK2	5	58453982	58460260	-	4768	protein_coding	polo like kinase 2 [Source:HGNC Symbol;Acc:HGNC:19699]	Pkinase	123	131	2962	4630	0.726901	0.861505	31.4053	37.0803
ENSG00000172936	26.7385	18.7906	2490.93	1262.61	-6.36231	2.83754e-27	3.70104e-25	MYD88	3	38138478	38143022	+	3989	protein_coding	myeloid differentiation primary response 88 [Source:HGNC Symbol;Acc:HGNC:7562]	Death	35	22	1790	1210	0.247235	0.172934	22.6852	11.583
ENSG00000176884	12.9873	7.68705	2062.32	825.391	-7.11908	5.63705e-27	7.23258e-25	GRIN1	9	137138390	137168762	+	6729	protein_coding	glutamate ionotropic receptor NMDA type subunit 1 [Source:HGNC Symbol;Acc:HGNC:4584]	Lig_chan	17	9	1482	791	0.0711877	0.0419387	11.134	4.48874
ENSG00000167642	404.133	382.644	24990	13956.5	-5.62933	5.88619e-27	7.51141e-25	SPINT2	19	38244035	38292614	+	5199	protein_coding	serine peptidase inhibitor, Kunitz type 2 [Source:HGNC Symbol;Acc:HGNC:11247]	Kunitz_BPTI	529	448	17958	13375	2.8671	2.70197	174.619	98.2365
ENSG00000124151	1185.66	1176.12	39636.3	58095.6	-5.37089	6.07157e-27	7.70633e-25	NCOA3	20	47501902	47656877	+	8402	protein_coding	nuclear receptor coactivator 3 [Source:HGNC Symbol;Acc:HGNC:7670]	DUF1518	1552	1377	28483	55675	5.20494	5.13894	171.379	253.033
ENSG00000170775	12.2233	5.1247	1150.84	842.087	-6.83109	6.51984e-27	8.23104e-25	GPR37	7	124745997	124765627	-	3021	protein_coding	G protein-coupled receptor 37 [Source:HGNC Symbol;Acc:HGNC:4494]	7tm_1	16	6	827	807	0.149237	0.0622763	13.8391	10.2005
ENSG00000111679	19.0989	16.2282	2606.43	1034.09	-6.68543	7.83569e-27	9.78757e-25	PTPN6	12	6946468	6961316	+	5009	protein_coding	protein tyrosine phosphatase, non-receptor type 6 [Source:HGNC Symbol;Acc:HGNC:9658]	Y_phosphatase	25	19	1873	991	0.140636	0.118939	18.9034	7.55477
novel.4	0	3.41647	1091	3019.83	-10.2916	9.19265e-27	1.14221e-24	-	1	106216174	106413322	+	29292	-	PF03372:Endonuclease/Exonuclease/phosphatase family	Exo_endo_phos	0	4	784	2894	0	0.00428187	1.35307	3.77267
ENSG00000254285	1.52791	1.70823	2714.97	949.565	-10.1481	1.05155e-26	1.29974e-24	KRT8P3	8	61578220	61579668	+	1449	processed_pseudogene	keratin 8 pseudogene 3 [Source:HGNC Symbol;Acc:HGNC:31056]	Filament	2	2	1951	910	0.0388927	0.0432797	68.0679	23.9813
ENSG00000127585	33.6141	32.4564	4597.78	1625.74	-6.55717	1.24597e-26	1.53202e-24	FBXL16	16	692498	705829	-	3989	protein_coding	F-box and leucine rich repeat protein 16 [Source:HGNC Symbol;Acc:HGNC:14150]	-	44	38	3304	1558	0.31081	0.298705	41.8726	14.9143
ENSG00000213937	3.05583	0	3797.62	1061.22	-10.5792	1.26787e-26	1.55087e-24	CLDN9	16	3012456	3014505	+	2050	protein_coding	claudin 9 [Source:HGNC Symbol;Acc:HGNC:2051]	-	4	0	2729	1017	0.054981	0	67.2982	18.9437
ENSG00000119714	12.2233	17.9364	2685.75	968.348	-6.92396	1.28998e-26	1.56979e-24	GPR68	14	91232532	91253925	-	3278	protein_coding	G protein-coupled receptor 68 [Source:HGNC Symbol;Acc:HGNC:4519]	7tm_1	16	21	1930	928	0.137536	0.200878	29.7647	10.8103
ENSG00000178078	26.7385	35.0188	2937.62	1464	-6.15666	1.30235e-26	1.57671e-24	STAP2	19	4324043	4342786	-	2766	protein_coding	signal transducing adaptor family member 2 [Source:HGNC Symbol;Acc:HGNC:30430]	-	35	41	2111	1403	0.356552	0.464787	38.5824	19.3689
ENSG00000189058	5.3477	11.1035	840.514	813.913	-6.66367	3.25243e-26	3.87795e-24	APOD	3	195568702	195584205	-	2197	protein_coding	apolipoprotein D [Source:HGNC Symbol;Acc:HGNC:612]	Lipocalin_2	7	13	604	780	0.0897789	0.185539	13.8983	13.557
ENSG00000177106	69.52	70.8917	8509.5	2935.3	-6.34881	5.4981e-26	6.45767e-24	EPS8L2	11	694438	727727	+	5693	protein_coding	EPS8 like 2 [Source:HGNC Symbol;Acc:HGNC:21296]	-	91	83	6115	2813	0.450409	0.457151	54.3011	18.8681
ENSG00000273802	4.58374	4.27058	741.712	613.565	-7.25611	7.0798e-26	8.23349e-24	HIST1H2BG	6	26215159	26216692	-	1534	protein_coding	histone cluster 1 H2B family member g [Source:HGNC Symbol;Acc:HGNC:4746]	Histone	6	5	533	588	0.110213	0.102204	17.5653	14.637
ENSG00000148735	13.7512	21.3529	979.672	1272	-6.00791	8.30126e-26	9.60668e-24	PLEKHS1	10	113751454	113783429	+	5402	protein_coding	pleckstrin homology domain containing S1 [Source:HGNC Symbol;Acc:HGNC:26285]	PH	18	25	704	1219	0.0938911	0.145114	6.58828	8.61684
ENSG00000158055	5.3477	13.6659	1340.09	774.261	-6.80892	1.71524e-25	1.94679e-23	GRHL3	1	24319322	24364482	+	3940	protein_coding	grainyhead like transcription factor 3 [Source:HGNC Symbol;Acc:HGNC:25839]	CP2	7	16	963	742	0.050062	0.127335	12.3562	7.19128
ENSG00000006327	152.027	193.884	15218.3	6288	-5.95843	2.1129e-25	2.37531e-23	TNFRSF12A	16	3018445	3022383	+	1848	protein_coding	TNF receptor superfamily member 12A [Source:HGNC Symbol;Acc:HGNC:18152]	-	199	227	10936	6026	3.03429	3.85165	299.165	124.516
ENSG00000158373	42.0176	54.6635	2880.57	1845.91	-5.6124	2.15287e-25	2.40877e-23	HIST1H2BD	6	26158146	26171349	+	871	protein_coding	histone cluster 1 H2B family member d [Source:HGNC Symbol;Acc:HGNC:4747]	Histone	55	64	2070	1769	1.77931	2.30401	120.145	77.5548
novel.693	2.29187	0	3371.8	1207.3	-10.9025	2.18678e-25	2.43516e-23	-	CHR_HSCHR7_2_CTG4_4	76510186	76515747	+	2006	-	-	-	3	0	2423	1157	0.0421402	0	61.0627	22.0243
ENSG00000142089	52.713	61.4964	10079.2	2550.26	-6.78926	2.20703e-25	2.44617e-23	IFITM3	11	319669	327537	-	1348	protein_coding	interferon induced transmembrane protein 3 [Source:HGNC Symbol;Acc:HGNC:5414]	-	69	72	7243	2444	1.44233	1.67481	271.633	69.2325
ENSG00000124466	16.0431	26.4776	4496.19	1195.83	-7.06751	2.25374e-25	2.48628e-23	LYPD3	19	43460787	43465660	-	2519	protein_coding	LY6/PLAUR domain containing 3 [Source:HGNC Symbol;Acc:HGNC:24880]	-	21	31	3231	1146	0.234908	0.385883	64.8429	17.3722
ENSG00000153714	8.40352	11.9576	726.404	826.435	-6.25837	2.28387e-25	2.5078e-23	LURAP1L	9	12775021	12822131	+	2132	protein_coding	leucine rich adaptor protein 1 like [Source:HGNC Symbol;Acc:HGNC:31452]	-	11	14	522	792	0.145382	0.205903	12.3776	14.1852
ENSG00000124493	6.11165	5.97882	1718.6	557.217	-7.5554	2.61552e-25	2.85867e-23	GRM4	6	34018645	34155622	-	16300	protein_coding	glutamate metabotropic receptor 4 [Source:HGNC Symbol;Acc:HGNC:4596]	ANF_receptor	8	7	1235	534	0.0138296	0.0134658	3.8303	1.25099
ENSG00000227218	11.4593	9.39528	698.573	837.913	-6.20041	3.18394e-25	3.4639e-23	AL157935.1	9	127934503	127940952	+	2520	antisense	-	-	15	11	502	803	0.167725	0.136872	10.0706	12.1678
ENSG00000120708	0	3.41647	1398.54	957.913	-9.49209	3.62715e-25	3.90241e-23	TGFBI	5	136028895	136063818	+	7810	protein_coding	transforming growth factor beta induced [Source:HGNC Symbol;Acc:HGNC:11771]	-	0	4	1005	918	0	0.0160595	6.50532	4.48839
ENSG00000115267	4.58374	4.27058	691.615	578.087	-7.16201	3.63661e-25	3.90241e-23	IFIH1	2	162267079	162318703	-	4528	protein_coding	interferon induced with helicase C domain 1 [Source:HGNC Symbol;Acc:HGNC:18873]	Helicase_C	6	5	497	554	0.037338	0.0346247	5.54886	4.67199
ENSG00000161905	5.3477	7.68705	885.044	571.826	-6.81055	3.86192e-25	4.10685e-23	ALOX15	17	4630902	4642294	-	3404	protein_coding	arachidonate 15-lipoxygenase [Source:HGNC Symbol;Acc:HGNC:433]	Lipoxygenase	7	9	636	548	0.0579449	0.082904	9.44542	6.14738
ENSG00000184557	29.0303	20.4988	1895.33	1096.7	-5.91379	5.9835e-25	6.25037e-23	SOCS3	17	78356778	78360077	-	2734	protein_coding	suppressor of cytokine signaling 3 [Source:HGNC Symbol;Acc:HGNC:19391]	SH2	38	24	1362	1051	0.391644	0.275255	25.1844	14.6792
ENSG00000164690	5.3477	5.97882	901.743	529.043	-6.98255	6.70798e-25	6.9763e-23	SHH	7	155799986	155812273	-	5038	protein_coding	sonic hedgehog [Source:HGNC Symbol;Acc:HGNC:10848]	-	7	7	648	507	0.0391513	0.0435675	6.50235	3.84281
ENSG00000276547	1.52791	5.97882	1040.9	596.869	-7.79629	7.66485e-25	7.93648e-23	PCDHGB5	5	141397987	141512979	+	4851	protein_coding	protocadherin gamma subfamily B, 5 [Source:HGNC Symbol;Acc:HGNC:8712]	Cadherin	2	7	748	572	0.0116173	0.045247	7.79514	4.5026
ENSG00000059378	5.3477	1.70823	826.598	594.782	-7.62925	8.55612e-25	8.7823e-23	PARP12	7	140023744	140063721	-	6285	protein_coding	poly(ADP-ribose) polymerase family member 12 [Source:HGNC Symbol;Acc:HGNC:21919]	WWE	7	2	594	570	0.0313833	0.00997809	4.77788	3.46313
ENSG00000183248	24.4466	13.6659	2621.73	1000.7	-6.56579	1.13557e-24	1.16054e-22	PRR36	19	7868719	7874379	-	4456	protein_coding	proline rich 36 [Source:HGNC Symbol;Acc:HGNC:26172]	-	32	16	1884	959	0.202354	0.112589	21.3742	8.21812
ENSG00000185924	38.1978	37.5811	3581.92	1471.3	-6.05892	1.16464e-24	1.18512e-22	RTN4RL1	17	1934677	2025345	-	3625	protein_coding	reticulon 4 receptor like 1 [Source:HGNC Symbol;Acc:HGNC:21329]	-	50	44	2574	1410	0.388659	0.380599	35.8967	14.8529
ENSG00000141738	9.93143	4.27058	1554.39	601.043	-7.23302	1.54525e-24	1.55898e-22	GRB7	17	39737927	39747291	+	3597	protein_coding	growth factor receptor bound protein 7 [Source:HGNC Symbol;Acc:HGNC:4567]	SH2	13	5	1117	576	0.101838	0.0435865	15.6988	6.11478
ENSG00000140832	75.6317	63.2046	2905.62	2320.69	-5.23361	1.85513e-24	1.85576e-22	MARVELD3	16	71626161	71642114	+	6446	protein_coding	MARVEL domain containing 3 [Source:HGNC Symbol;Acc:HGNC:30525]	-	99	74	2088	2224	0.432764	0.359968	16.3755	13.1748
ENSG00000142765	15.2791	26.4776	1914.81	999.652	-6.12909	1.86515e-24	1.85791e-22	SYTL1	1	27342020	27353937	+	5584	protein_coding	synaptotagmin like 1 [Source:HGNC Symbol;Acc:HGNC:15584]	C2	20	31	1376	958	0.100923	0.174076	12.4574	6.55117
ENSG00000174945	9.93143	16.2282	1540.48	726.261	-6.44205	1.96419e-24	1.94834e-22	AMZ1	7	2679522	2775500	+	7011	protein_coding	archaelysin family metallopeptidase 1 [Source:HGNC Symbol;Acc:HGNC:22231]	-	13	19	1107	696	0.052248	0.084976	7.98218	3.79078
ENSG00000163347	2.29187	9.39528	885.044	684.522	-7.09195	2.21055e-24	2.18354e-22	CLDN1	3	190305701	190322475	-	3663	protein_coding	claudin 1 [Source:HGNC Symbol;Acc:HGNC:2032]	-	3	11	636	656	0.0230776	0.0941626	8.77756	6.83858
ENSG00000119938	21.3908	27.3317	1007.5	2042.09	-5.97005	2.92836e-24	2.88053e-22	PPP1R3C	10	91628442	91633054	-	2524	protein_coding	protein phosphatase 1 regulatory subunit 3C [Source:HGNC Symbol;Acc:HGNC:9293]	-	28	32	724	1957	0.31259	0.397542	14.5012	29.6074
ENSG00000103089	6.11165	5.97882	1071.52	496.696	-7.01798	2.98316e-24	2.91818e-22	FA2H	16	74712955	74774831	-	3279	protein_coding	fatty acid 2-hydroxylase [Source:HGNC Symbol;Acc:HGNC:21197]	-	8	7	770	476	0.0687472	0.066939	11.8714	5.54325
ENSG00000101210	1676.88	1660.4	221077	58460.9	-6.38822	2.99136e-24	2.91818e-22	EEF1A2	20	63488012	63499322	-	4910	protein_coding	eukaryotic translation elongation factor 1 alpha 2 [Source:HGNC Symbol;Acc:HGNC:3192]	GTP_EFTU	2195	1944	158868	56025	12.5968	12.4147	1635.72	435.712
ENSG00000100097	101.606	90.5364	11924.4	3489.39	-6.3256	3.67579e-24	3.57112e-22	LGALS1	22	37675608	37679806	+	1099	protein_coding	galectin 1 [Source:HGNC Symbol;Acc:HGNC:6561]	-	133	106	8569	3344	3.41005	3.02434	394.172	116.19
ENSG00000160179	27.5024	19.6447	2012.22	987.13	-5.98849	5.09194e-24	4.8472e-22	ABCG1	21	42199689	42297244	+	6121	protein_coding	ATP binding cassette subfamily G member 1 [Source:HGNC Symbol;Acc:HGNC:73]	ABC2_membrane	36	23	1446	946	0.165724	0.117822	11.9426	5.90157
ENSG00000143341	143.624	106.765	4446.09	4101.91	-5.09272	5.62682e-24	5.33486e-22	HMCN1	1	185734551	186190949	+	18579	protein_coding	hemicentin 1 [Source:HGNC Symbol;Acc:HGNC:19194]	I-set	188	125	3195	3931	0.285129	0.210965	8.69365	8.07941
ENSG00000167106	398.785	409.976	29334.5	12159.6	-5.68103	6.24356e-24	5.89591e-22	FAM102A	9	127940579	127980513	-	6100	protein_coding	family with sequence similarity 102 member A [Source:HGNC Symbol;Acc:HGNC:31419]	-	522	480	21080	11653	2.41128	2.46737	174.701	72.9469
ENSG00000175920	11.4593	8.54117	1501.51	583.304	-6.69939	8.09252e-24	7.58128e-22	DOK7	4	3463311	3501473	+	4031	protein_coding	docking protein 7 [Source:HGNC Symbol;Acc:HGNC:26594]	-	15	10	1079	559	0.104854	0.0777875	13.532	5.29539
ENSG00000158716	10.6954	8.54117	2573.03	591.652	-7.35908	8.61545e-24	8.03927e-22	DUSP23	1	159780932	159782543	+	825	protein_coding	dual specificity phosphatase 23 [Source:HGNC Symbol;Acc:HGNC:21480]	DSPc	14	10	1849	567	0.478168	0.380074	113.302	26.2439
ENSG00000278828	23.6827	25.6235	1167.53	988.174	-5.45076	1.01105e-23	9.39721e-22	HIST1H3H	6	27810064	27811300	+	1237	protein_coding	histone cluster 1 H3 family member h [Source:HGNC Symbol;Acc:HGNC:4775]	Histone	31	30	839	947	0.706152	0.760456	34.2883	29.2334
ENSG00000102683	1.52791	2.56235	809.899	617.739	-8.46196	1.20689e-23	1.11298e-21	SGCG	13	23180952	23325165	+	1624	protein_coding	sarcoglycan gamma [Source:HGNC Symbol;Acc:HGNC:10809]	-	2	3	582	592	0.0347017	0.0579239	18.1172	13.9198
ENSG00000159167	6.11165	3.41647	517.667	636.522	-6.90855	1.27973e-23	1.17556e-21	STC1	8	23841915	23854807	-	4149	protein_coding	stanniocalcin 1 [Source:HGNC Symbol;Acc:HGNC:11373]	-	8	4	372	610	0.0543317	0.0302301	4.53266	5.61417
ENSG00000074370	236.063	221.216	25372.7	7498.43	-6.1675	1.31277e-23	1.20123e-21	ATP2A3	17	3923870	3964464	-	6893	protein_coding	ATPase sarcoplasmic/endoplasmic reticulum Ca2+ transporting 3 [Source:HGNC Symbol;Acc:HGNC:813]	E1-E2_ATPase	309	259	18233	7186	1.26315	1.17819	133.722	39.8087
ENSG00000167653	12.9873	6.83293	1910.64	615.652	-6.986	1.39784e-23	1.27414e-21	PSCA	8	142670308	142682724	+	1763	protein_coding	prostate stem cell antigen [Source:HGNC Symbol;Acc:HGNC:9500]	-	17	8	1373	590	0.271708	0.142285	39.3706	12.779
ENSG00000138061	113.066	93.0987	3030.86	4856.35	-5.25731	1.48436e-23	1.33751e-21	CYP1B1	2	38066973	38109902	-	6014	protein_coding	cytochrome P450 family 1 subfamily B member 1 [Source:HGNC Symbol;Acc:HGNC:2597]	p450	148	109	2178	4654	0.693433	0.56831	18.3083	29.5503
ENSG00000026508	5.3477	11.1035	677.699	645.913	-6.34163	1.67019e-23	1.49923e-21	CD44	11	35138870	35232402	+	10004	protein_coding	CD44 molecule (Indian blood group) [Source:HGNC Symbol;Acc:HGNC:1681]	Xlink	7	13	487	619	0.0197165	0.0407467	2.46099	2.36274
ENSG00000121316	0	4.27058	640.126	1435.83	-8.98065	1.88068e-23	1.68179e-21	PLBD1	12	14503661	14568349	-	2841	protein_coding	phospholipase B domain containing 1 [Source:HGNC Symbol;Acc:HGNC:26215]	-	0	5	460	1376	0	0.055185	8.18541	18.4946
ENSG00000121413	1.52791	4.27058	731.97	523.826	-7.78332	2.3334e-23	2.06318e-21	ZSCAN18	19	58083838	58118427	-	8307	protein_coding	zinc finger and SCAN domain containing 18 [Source:HGNC Symbol;Acc:HGNC:21037]	SCAN	2	5	526	502	0.0067841	0.0188733	3.20107	2.30759
ENSG00000141934	21.3908	28.1858	3570.79	1028.87	-6.53702	2.35242e-23	2.07224e-21	PLPP2	19	281040	291504	-	7059	protein_coding	phospholipid phosphatase 2 [Source:HGNC Symbol;Acc:HGNC:9230]	-	28	33	2566	986	0.111769	0.146586	18.3767	5.33375
ENSG00000198753	20.6268	26.4776	4380.69	1011.13	-6.83989	2.88151e-23	2.51951e-21	PLXNB3	X	153764196	153779346	+	7007	protein_coding	plexin B3 [Source:HGNC Symbol;Acc:HGNC:9105]	Sema	27	31	3148	969	0.108577	0.138724	22.712	5.28069
ENSG00000138028	2.29187	4.27058	772.326	465.391	-7.57362	3.35048e-23	2.89729e-21	CGREF1	2	27098889	27119115	-	4039	protein_coding	cell growth regulator with EF-hand domain 1 [Source:HGNC Symbol;Acc:HGNC:16962]	-	3	5	555	446	0.0209293	0.0388167	6.94661	4.21657
ENSG00000138744	22.9187	33.3105	1519.6	1058.09	-5.52099	3.36266e-23	2.89729e-21	NAAA	4	75913657	75941051	-	4459	protein_coding	N-acylethanolamine acid amidase [Source:HGNC Symbol;Acc:HGNC:736]	-	30	39	1092	1014	0.189579	0.274252	12.3805	8.68359
ENSG00000163694	137.512	159.72	4851.04	4187.48	-4.92666	3.93173e-23	3.37528e-21	RBM47	4	40423267	40630875	-	8544	protein_coding	RNA binding motif protein 47 [Source:HGNC Symbol;Acc:HGNC:30358]	RRM_1	180	187	3486	4013	0.593633	0.686283	20.6262	17.9352
ENSG00000187608	48.1293	77.7246	6167.48	2234.09	-6.06198	4.26979e-23	3.65222e-21	ISG15	1	1001138	1014541	+	942	protein_coding	ISG15 ubiquitin-like modifier [Source:HGNC Symbol;Acc:HGNC:4053]	ubiquitin	63	91	4432	2141	1.8845	3.0291	237.85	86.789
ENSG00000141376	1097.81	1053.13	46204.6	27029.2	-5.08945	6.00439e-23	5.0807e-21	BCAS3	17	60677453	61392838	+	14101	protein_coding	BCAS3, microtubule associated cell migration factor [Source:HGNC Symbol;Acc:HGNC:14347]	-	1437	1233	33203	25903	2.87153	2.7418	119.037	70.1454
ENSG00000101213	17.571	4.27058	2098.5	806.608	-7.04229	6.32594e-23	5.33367e-21	PTK6	20	63528001	63537370	-	2947	protein_coding	protein tyrosine kinase 6 [Source:HGNC Symbol;Acc:HGNC:9617]	Pkinase_Tyr	23	5	1508	773	0.219915	0.0532001	25.8687	10.0161
ENSG00000125637	103.898	79.4328	4988.81	2676.52	-5.38504	6.62963e-23	5.56984e-21	PSD4	2	113157325	113209396	+	13442	protein_coding	pleckstrin and Sec7 domain containing 4 [Source:HGNC Symbol;Acc:HGNC:19096]	Sec7	136	93	3585	2565	0.28509	0.216941	13.4828	7.28656
ENSG00000175356	16.807	15.3741	1362.36	670.956	-5.98003	6.72351e-23	5.62867e-21	SCUBE2	11	9020391	9138114	-	7099	protein_coding	signal peptide, CUB domain and EGF like domain containing 2 [Source:HGNC Symbol;Acc:HGNC:30425]	CUB	22	18	979	643	0.0873237	0.0795056	6.97171	3.4587
ENSG00000140961	8.40352	28.1858	3274.39	1090.43	-6.90557	7.91997e-23	6.60688e-21	OSGIN1	16	83948282	83966332	+	3460	protein_coding	oxidative stress induced growth inhibitor 1 [Source:HGNC Symbol;Acc:HGNC:30093]	-	11	33	2353	1045	0.0895825	0.299061	34.3795	11.5329
ENSG00000151715	5.3477	9.39528	670.741	520.695	-6.34578	8.2595e-23	6.84176e-21	TMEM45B	11	129815819	129860003	+	3027	protein_coding	transmembrane protein 45B [Source:HGNC Symbol;Acc:HGNC:25194]	-	7	11	482	499	0.0651616	0.113947	8.04986	6.29487
ENSG00000073350	317.806	345.063	37476.6	10145.7	-6.16678	9.29581e-23	7.67327e-21	LLGL2	17	75525080	75575208	+	7909	protein_coding	LLGL2, scribble cell polarity complex component [Source:HGNC Symbol;Acc:HGNC:6629]	-	416	404	26931	9723	1.4821	1.6017	172.141	46.9437
ENSG00000188483	51.1851	66.6211	2116.59	1860.52	-5.07824	9.44045e-23	7.76551e-21	IER5L	9	129175552	129178262	-	2711	protein_coding	immediate early response 5 like [Source:HGNC Symbol;Acc:HGNC:23679]	-	67	78	1521	1783	0.696389	0.902169	28.3631	25.1143
ENSG00000214530	561.508	584.216	41885.1	15816	-5.65426	9.57804e-23	7.82417e-21	STARD10	11	72754729	72794168	-	4197	protein_coding	StAR related lipid transfer domain containing 10 [Source:HGNC Symbol;Acc:HGNC:10666]	START	735	684	30099	15157	4.93463	5.11022	362.549	137.903
ENSG00000064195	15.2791	10.2494	859.996	627.13	-5.85895	9.82679e-23	7.99968e-21	DLX3	17	49990005	49995224	-	2715	protein_coding	distal-less homeobox 3 [Source:HGNC Symbol;Acc:HGNC:2916]	Homeobox	20	12	618	601	0.207571	0.138591	11.5073	8.45286
ENSG00000178567	2.29187	0	819.64	1739.48	-10.0625	1.28339e-22	1.03407e-20	EPM2AIP1	3	36985043	36993168	-	8126	protein_coding	EPM2A interacting protein 1 [Source:HGNC Symbol;Acc:HGNC:19735]	-	3	0	589	1667	0.0104028	0	3.66431	7.83353
ENSG00000121068	650.127	632.046	31362	16131.1	-5.21102	1.30255e-22	1.04309e-20	TBX2	17	61399896	61409466	+	6029	protein_coding	T-box 2 [Source:HGNC Symbol;Acc:HGNC:11597]	T-box	851	740	22537	15459	3.97732	3.84866	188.975	97.9118
ENSG00000116016	399.549	374.957	14654.7	9538.43	-4.9651	1.36566e-22	1.08554e-20	EPAS1	2	46293667	46386703	+	7302	protein_coding	endothelial PAS domain protein 1 [Source:HGNC Symbol;Acc:HGNC:3374]	-	523	439	10531	9141	2.01821	1.88515	72.9091	47.8025
ENSG00000143552	3.05583	5.97882	534.366	492.522	-6.84297	1.75733e-22	1.37831e-20	NUP210L	1	153992685	154155116	-	5889	protein_coding	nucleoporin 210 like [Source:HGNC Symbol;Acc:HGNC:29915]	-	4	7	384	472	0.0191392	0.0372717	3.29643	3.06055
ENSG00000140403	48.8932	42.7058	1498.73	1520.35	-5.04194	2.22284e-22	1.72055e-20	DNAJA4	15	78264086	78282196	+	6591	protein_coding	DnaJ heat shock protein family (Hsp40) member A4 [Source:HGNC Symbol;Acc:HGNC:14885]	DnaJ_C	64	50	1077	1457	0.273612	0.237871	8.26072	8.44126
ENSG00000095739	252.106	254.527	7568.8	6353.74	-4.78032	2.26409e-22	1.74106e-20	BAMBI	10	28677342	28682939	+	2314	protein_coding	BMP and activin membrane bound inhibitor [Source:HGNC Symbol;Acc:HGNC:30251]	-	330	298	5439	6089	4.01844	4.03809	118.825	100.48
ENSG00000184731	15.2791	11.9576	674.916	690.782	-5.64493	2.47389e-22	1.89622e-20	FAM110C	2	38814	46870	-	3968	protein_coding	family with sequence similarity 110 member C [Source:HGNC Symbol;Acc:HGNC:33340]	-	20	14	485	662	0.142025	0.110632	6.17908	6.37067
ENSG00000158258	26.7385	15.3741	1270.51	846.261	-5.64657	3.05324e-22	2.31772e-20	CLSTN2	3	139935185	140577397	+	14596	protein_coding	calsyntenin 2 [Source:HGNC Symbol;Acc:HGNC:17448]	Cadherin	35	18	913	811	0.0675679	0.0386688	3.16221	2.12171
ENSG00000233493	1.52791	15.3741	1507.08	924.521	-7.18892	3.53585e-22	2.67546e-20	TMEM238	19	55379245	55384598	-	1000	protein_coding	transmembrane protein 238 [Source:HGNC Symbol;Acc:HGNC:40042]	-	2	18	1083	886	0.0563555	0.564411	54.7498	33.8324
ENSG00000142197	210.852	218.654	6682.36	5245.56	-4.79552	4.30469e-22	3.24681e-20	DOPEY2	21	36156782	36294274	+	9030	protein_coding	dopey family member 2 [Source:HGNC Symbol;Acc:HGNC:1291]	-	276	256	4802	5027	0.861247	0.888945	26.8836	21.2579
ENSG00000167880	0	0	7563.23	2960.35	-15.1118	4.53029e-22	3.40608e-20	EVPL	17	76004502	76027452	-	7510	protein_coding	envoplakin [Source:HGNC Symbol;Acc:HGNC:3503]	-	0	0	5435	2837	0	0	36.5859	14.4251
ENSG00000124507	39.7257	31.6023	2055.36	1102.96	-5.46695	4.68475e-22	3.51103e-20	PACSIN1	6	34466061	34535231	+	4807	protein_coding	protein kinase C and casein kinase substrate in neurons 1 [Source:HGNC Symbol;Acc:HGNC:8570]	-	52	37	1477	1057	0.304815	0.241352	15.5332	8.39653
ENSG00000117595	6.11165	0.854117	552.457	592.695	-7.32624	5.03132e-22	3.75884e-20	IRF6	1	209785623	209806175	-	4965	protein_coding	interferon regulatory factor 6 [Source:HGNC Symbol;Acc:HGNC:6121]	-	8	1	397	568	0.0454022	0.00631544	4.04227	4.36846
ENSG00000171223	137.512	156.303	5698.52	3614.61	-4.9864	6.56334e-22	4.85729e-20	JUNB	19	12791496	12793315	+	1820	protein_coding	JunB proto-oncogene, AP-1 transcription factor subunit [Source:HGNC Symbol;Acc:HGNC:6205]	Jun	180	183	4095	3464	2.78681	3.15284	113.746	72.6784
ENSG00000124225	253.634	246.84	8997.95	5904	-4.89598	6.62079e-22	4.88449e-20	PMEPA1	20	57648392	57711536	-	5619	protein_coding	prostate transmembrane protein, androgen induced 1 [Source:HGNC Symbol;Acc:HGNC:14107]	-	332	289	6466	5658	1.66489	1.61273	58.1742	38.4506
ENSG00000117983	3.81978	4.27058	1377.66	358.956	-7.74724	6.66585e-22	4.90241e-20	MUC5B	11	1223066	1262172	+	18598	protein_coding	mucin 5B, oligomeric mucus/gel-forming [Source:HGNC Symbol;Acc:HGNC:7516]	VWD	5	5	990	344	0.00757548	0.00842998	2.69106	0.706303
ENSG00000146950	0.763957	1.70823	1063.17	763.826	-9.55466	7.698e-22	5.64392e-20	SHROOM2	X	9786456	9949443	+	8191	protein_coding	shroom family member 2 [Source:HGNC Symbol;Acc:HGNC:630]	PDZ	1	2	764	732	0.00344009	0.00765624	4.71531	3.4125
ENSG00000185442	106.954	108.473	3832.41	2665.04	-4.91452	8.82347e-22	6.42915e-20	FAM174B	15	92617443	92809884	-	4657	protein_coding	family with sequence similarity 174 member B [Source:HGNC Symbol;Acc:HGNC:34339]	-	140	127	2754	2554	0.847087	0.855106	29.8959	20.9418
ENSG00000107562	0	0	3899.2	3809.74	-14.6629	1.2096e-21	8.7062e-20	CXCL12	10	44370165	44386493	-	6077	protein_coding	C-X-C motif chemokine ligand 12 [Source:HGNC Symbol;Acc:HGNC:10672]	-	0	0	2802	3651	0	0	23.3095	22.9415
ENSG00000263528	6.11165	6.83293	1134.14	388.174	-6.87871	1.29581e-21	9.29832e-20	IKBKE	1	206470476	206496889	+	3791	protein_coding	inhibitor of nuclear factor kappa B kinase subunit epsilon [Source:HGNC Symbol;Acc:HGNC:14552]	Pkinase	8	8	815	372	0.0594624	0.0661696	10.8682	3.74704
ENSG00000187583	5.3477	6.83293	1068.73	376.696	-6.89398	1.92355e-21	1.37194e-19	PLEKHN1	1	966497	975865	+	2833	protein_coding	pleckstrin homology domain containing N1 [Source:HGNC Symbol;Acc:HGNC:25284]	-	7	8	768	361	0.0696238	0.0885454	13.7047	4.86586
ENSG00000130545	4.58374	13.6659	1068.73	540.522	-6.47526	2.17067e-21	1.53889e-19	CRB3	19	6463777	6467221	+	1592	protein_coding	crumbs 3, cell polarity complex component [Source:HGNC Symbol;Acc:HGNC:20237]	-	6	16	768	518	0.106198	0.315137	24.3878	12.4247
ENSG00000167772	6.11165	6.83293	754.236	382.956	-6.45806	2.86718e-21	2.00261e-19	ANGPTL4	19	8363289	8374373	+	2482	protein_coding	angiopoietin like 4 [Source:HGNC Symbol;Acc:HGNC:16039]	Fibrinogen_C	8	8	542	367	0.0908227	0.101067	11.0395	5.64629
ENSG00000196878	6.11165	2.56235	1164.75	363.13	-7.44425	2.98424e-21	2.07823e-19	LAMB3	1	209614870	209652466	-	4688	protein_coding	laminin subunit beta 3 [Source:HGNC Symbol;Acc:HGNC:6490]	Laminin_EGF	8	3	837	348	0.0480849	0.0200658	9.02592	2.83459
ENSG00000008513	254.398	230.611	6522.33	5672.35	-4.65196	3.04362e-21	2.11335e-19	ST3GAL1	8	133454848	133571940	-	8729	protein_coding	ST3 beta-galactoside alpha-2,3-sialyltransferase 1 [Source:HGNC Symbol;Acc:HGNC:10862]	Glyco_transf_29	333	270	4687	5436	1.07494	0.969889	27.1446	23.7801
ENSG00000139629	210.088	174.24	5506.48	4531.82	-4.70673	3.89528e-21	2.68888e-19	GALNT6	12	51351247	51392867	-	7347	protein_coding	polypeptide N-acetylgalactosaminyltransferase 6 [Source:HGNC Symbol;Acc:HGNC:4128]	Glycos_transf_2	275	204	3957	4343	1.0547	0.870648	27.2276	22.5724
ENSG00000006047	29.0303	19.6447	1127.18	813.913	-5.31419	4.27096e-21	2.93961e-19	YBX2	17	7288252	7294615	-	4618	protein_coding	Y-box binding protein 2 [Source:HGNC Symbol;Acc:HGNC:17948]	-	38	23	810	780	0.231865	0.15617	8.86717	6.4497
ENSG00000204019	2.29187	0	720.838	966.261	-9.45968	5.34286e-21	3.63499e-19	CT83	X	116461682	116463003	-	548	protein_coding	cancer/testis antigen 83 [Source:HGNC Symbol;Acc:HGNC:33494]	-	3	0	518	926	0.154258	0	47.7862	64.5252
ENSG00000134330	42.0176	42.7058	1476.47	1154.09	-4.95636	5.39457e-21	3.65963e-19	IAH1	2	9473658	9496543	+	5908	protein_coding	isoamyl acetate hydrolyzing esterase 1 (putative) [Source:HGNC Symbol;Acc:HGNC:27696]	-	55	50	1061	1106	0.262318	0.26537	9.0788	7.14848
ENSG00000162069	45.8374	34.1647	1948.21	1116.52	-5.25778	5.46512e-21	3.69687e-19	BICDL2	16	3027682	3036926	-	4690	protein_coding	BICD family like cargo adaptor 2 [Source:HGNC Symbol;Acc:HGNC:33584]	-	60	40	1400	1070	0.360483	0.26743	15.0907	8.71184
ENSG00000136883	25.2106	24.7694	1817.4	757.565	-5.68644	6.89341e-21	4.59717e-19	KIF12	9	114086126	114099291	-	3036	protein_coding	kinesin family member 12 [Source:HGNC Symbol;Acc:HGNC:21495]	-	33	29	1306	726	0.30628	0.299515	21.7468	9.13132
ENSG00000163235	19.8629	14.52	684.657	709.565	-5.3384	7.98198e-21	5.30813e-19	TGFA	2	70447280	70554193	-	4963	protein_coding	transforming growth factor alpha [Source:HGNC Symbol;Acc:HGNC:11765]	-	26	17	492	680	0.147617	0.107406	5.01158	5.23195
ENSG00000138835	74.8677	52.1011	3181.15	1660.17	-5.25147	8.46443e-21	5.61315e-19	RGS3	9	113444731	113597743	+	13793	protein_coding	regulator of G protein signaling 3 [Source:HGNC Symbol;Acc:HGNC:9999]	RGS	98	61	2286	1591	0.200204	0.138674	8.3786	4.40464
ENSG00000278318	1.52791	1.70823	521.842	621.913	-8.46903	8.62104e-21	5.701e-19	ZNF229	19	44417519	44448578	-	5505	protein_coding	zinc finger protein 229 [Source:HGNC Symbol;Acc:HGNC:13022]	-	2	2	375	596	0.0102372	0.0113919	3.44372	4.13416
ENSG00000198125	3.05583	0.854117	694.398	416.348	-8.11747	1.163e-20	7.66932e-19	MB	22	35606764	35637951	-	2168	protein_coding	myoglobin [Source:HGNC Symbol;Acc:HGNC:6915]	-	4	1	499	399	0.0519885	0.0144632	11.6358	7.02769
ENSG00000075426	170.362	162.282	5339.49	3613.56	-4.75016	1.24876e-20	8.21191e-19	FOSL2	2	28392448	28417312	+	7157	protein_coding	FOS like 2, AP-1 transcription factor subunit [Source:HGNC Symbol;Acc:HGNC:3798]	-	223	190	3837	3463	0.877971	0.832425	27.1028	18.4765
ENSG00000155324	2.29187	0	673.524	918.261	-9.37592	1.34554e-20	8.82375e-19	GRAMD2B	5	126360132	126496494	+	5051	protein_coding	GRAM domain containing 2B [Source:HGNC Symbol;Acc:HGNC:24911]	GRAM	3	0	484	880	0.0167359	0	4.8442	6.65279
ENSG00000124171	155.083	124.701	3202.02	6417.39	-5.10334	1.46428e-20	9.57585e-19	PARD6B	20	50731544	50756795	+	4726	protein_coding	par-6 family cell polarity regulator beta [Source:HGNC Symbol;Acc:HGNC:16245]	-	203	146	2301	6150	1.21034	0.968683	24.6137	49.6913
ENSG00000090339	10.6954	5.1247	975.497	412.174	-6.44375	1.48836e-20	9.70643e-19	ICAM1	19	10270835	10286615	+	3706	protein_coding	intercellular adhesion molecule 1 [Source:HGNC Symbol;Acc:HGNC:5344]	-	14	6	701	395	0.106446	0.0507655	9.56239	4.06996
ENSG00000165272	67.2282	59.7882	3089.31	1536	-5.18582	1.5601e-20	1.00906e-18	AQP3	9	33441154	33447633	-	2950	protein_coding	aquaporin 3 (Gill blood group) [Source:HGNC Symbol;Acc:HGNC:636]	-	88	70	2220	1472	0.840557	0.744044	38.0439	19.0539
ENSG00000283526	3.05583	0	957.406	471.652	-8.81034	1.75075e-20	1.12928e-18	PRRT1B	9	131545514	131558620	+	1312	protein_coding	proline rich transmembrane protein 1B [Source:HGNC Symbol;Acc:HGNC:53642]	-	4	0	688	452	0.0859078	0	26.5099	13.1554
ENSG00000181444	135.984	140.075	5642.85	3026.09	-4.97272	1.8112e-20	1.16509e-18	ZNF467	7	149764182	149773479	-	2734	protein_coding	zinc finger protein 467 [Source:HGNC Symbol;Acc:HGNC:23154]	zf-C2H2	178	164	4055	2900	1.83454	1.88091	74.9801	40.504
ENSG00000169242	120.705	105.91	6953.72	2673.39	-5.40841	1.94102e-20	1.2452e-18	EFNA1	1	155127460	155134857	+	2539	protein_coding	ephrin A1 [Source:HGNC Symbol;Acc:HGNC:3221]	-	158	124	4997	2562	1.75348	1.53138	99.4948	38.5314
ENSG00000169862	0	0	4027.23	2188.17	-14.3521	1.95992e-20	1.25392e-18	CTNND2	5	10971840	11904043	-	6863	protein_coding	catenin delta 2 [Source:HGNC Symbol;Acc:HGNC:2516]	Arm	0	0	2894	2097	0	0	21.3176	11.6676
ENSG00000124813	38.1978	30.7482	1100.74	1012.17	-4.93617	2.26304e-20	1.43618e-18	RUNX2	6	45328157	45664349	+	8192	protein_coding	runt related transcription factor 2 [Source:HGNC Symbol;Acc:HGNC:10472]	Runt	50	36	791	970	0.171983	0.137796	4.88135	4.52148
ENSG00000178726	5.3477	0.854117	655.434	375.652	-7.3426	3.5613e-20	2.23011e-18	THBD	20	23045633	23049741	-	4109	protein_coding	thrombomodulin [Source:HGNC Symbol;Acc:HGNC:11784]	Lectin_C	7	1	471	360	0.048003	0.00763109	5.7948	3.34553
ENSG00000168542	427.052	432.183	9692.35	9235.82	-4.46134	3.67238e-20	2.28754e-18	COL3A1	2	188974320	189012746	+	6811	protein_coding	collagen type III alpha 1 chain [Source:HGNC Symbol;Acc:HGNC:2201]	VWC	559	506	6965	8851	2.31264	2.3295	51.6968	49.6227
ENSG00000157601	5.3477	6.83293	602.554	346.435	-6.28734	3.7453e-20	2.32682e-18	MX1	21	41420304	41459214	+	8616	protein_coding	MX dynamin like GTPase 1 [Source:HGNC Symbol;Acc:HGNC:7532]	-	7	8	433	332	0.0228928	0.0291143	2.5406	1.4714
ENSG00000137393	49.6572	52.1011	1263.55	1524.52	-4.77641	3.93828e-20	2.44029e-18	RNF144B	6	18387350	18468874	+	5175	protein_coding	ring finger protein 144B [Source:HGNC Symbol;Acc:HGNC:21578]	IBR	65	61	908	1461	0.353924	0.369609	8.87011	10.7805
ENSG00000260401	37.4339	52.9552	2478.4	1164.52	-5.33393	4.11307e-20	2.54192e-18	AP002761.4	11	73238975	73242335	+	3361	sense_overlapping	-	-	49	62	1781	1116	0.410803	0.578423	26.7885	12.6793
ENSG00000156453	40.4897	21.3529	2303.06	953.739	-5.71508	4.21299e-20	2.59011e-18	PCDH1	5	141853111	141879246	-	5903	protein_coding	protocadherin 1 [Source:HGNC Symbol;Acc:HGNC:8655]	Cadherin	53	25	1655	914	0.252994	0.132797	14.1736	5.91251
ENSG00000111331	0	0	3377.36	2012.87	-14.1466	5.59919e-20	3.41565e-18	OAS3	12	112938352	112973249	+	8251	protein_coding	2'-5'-oligoadenylate synthetase 3 [Source:HGNC Symbol;Acc:HGNC:8088]	NTP_transf_2	0	0	2427	1929	0	0	14.8702	8.92739
ENSG00000112852	6.87561	5.97882	619.253	340.174	-6.21841	6.18014e-20	3.75066e-18	PCDHB2	5	141094578	141098703	+	4126	protein_coding	protocadherin beta 2 [Source:HGNC Symbol;Acc:HGNC:8687]	Cadherin	9	7	445	326	0.0614638	0.0531975	5.45236	3.01708
ENSG00000087510	234.535	216.946	4814.86	5307.13	-4.48661	6.29404e-20	3.81e-18	TFAP2C	20	56629302	56639283	+	3005	protein_coding	transcription factor AP-2 gamma [Source:HGNC Symbol;Acc:HGNC:11744]	TF_AP-2	307	254	3460	5086	2.87873	2.6504	58.2084	64.6295
ENSG00000196562	1115.38	1079.6	34353.9	21089.7	-4.65872	7.37288e-20	4.44028e-18	SULF2	20	47656348	47786616	-	6657	protein_coding	sulfatase 2 [Source:HGNC Symbol;Acc:HGNC:20392]	Sulfatase	1460	1264	24687	20211	6.17989	5.95376	187.475	115.933
ENSG00000163220	4.58374	2.56235	395.208	381.913	-6.7512	7.50366e-20	4.50754e-18	S100A9	1	153357854	153361027	+	577	protein_coding	S100 calcium binding protein A9 [Source:HGNC Symbol;Acc:HGNC:10499]	-	6	3	284	366	0.29301	0.16303	24.8826	24.2217
ENSG00000176720	45.0734	64.9129	3278.56	1360.7	-5.39943	8.19842e-20	4.89996e-18	BOK	2	241551424	241574138	+	2711	protein_coding	BOK, BCL2 family apoptosis regulator [Source:HGNC Symbol;Acc:HGNC:1087]	-	59	76	2356	1304	0.613238	0.879036	43.9339	18.3674
ENSG00000001617	151.263	163.99	9949.79	3469.56	-5.41165	8.28794e-20	4.94095e-18	SEMA3F	3	50155045	50189075	+	4826	protein_coding	semaphorin 3F [Source:HGNC Symbol;Acc:HGNC:10728]	Sema	198	192	7150	3325	1.15607	1.24749	74.8984	26.3089
ENSG00000111321	0	0.854117	8143.52	4328.35	-13.9123	8.67623e-20	5.14644e-18	LTBR	12	6375045	6391571	+	6280	protein_coding	lymphotoxin beta receptor [Source:HGNC Symbol;Acc:HGNC:6718]	-	0	1	5852	4148	0	0.00499302	47.1084	25.2219
ENSG00000198131	35.142	32.4564	889.219	1086.26	-4.86876	1.02757e-19	6.06471e-18	ZNF544	19	58228594	58277495	+	7130	protein_coding	zinc finger protein 544 [Source:HGNC Symbol;Acc:HGNC:16759]	KRAB	46	38	639	1041	0.181792	0.167115	4.5307	5.57519
ENSG00000010278	864.799	840.451	23740.3	16189.6	-4.54939	1.04215e-19	6.13543e-18	CD9	12	6199715	6238271	+	4165	protein_coding	CD9 molecule [Source:HGNC Symbol;Acc:HGNC:1709]	Tetraspannin	1132	984	17060	15515	7.6584	7.40803	207.07	142.245
ENSG00000267280	100.078	95.6611	4281.89	2069.22	-5.01971	1.27311e-19	7.47652e-18	TBX2-AS1	17	61393456	61411555	-	1206	antisense	TBX2 antisense RNA 1 [Source:HGNC Symbol;Acc:HGNC:50355]	-	131	112	3077	1983	3.06077	2.91201	128.983	62.7876
ENSG00000166801	0	2.56235	482.878	1194.78	-9.41924	1.35603e-19	7.94373e-18	FAM111A	11	59142748	59155039	+	7221	protein_coding	family with sequence similarity 111 member A [Source:HGNC Symbol;Acc:HGNC:24725]	-	0	3	347	1145	0	0.0130271	2.42933	6.0549
ENSG00000120675	29.0303	24.7694	708.314	1590.26	-5.4165	1.46074e-19	8.49387e-18	DNAJC15	13	43023203	43114224	+	8042	protein_coding	DnaJ heat shock protein family (Hsp40) member C15 [Source:HGNC Symbol;Acc:HGNC:20325]	-	38	29	509	1524	0.133145	0.113072	3.19969	7.23635
ENSG00000008283	638.668	579.091	19471	11573.2	-4.67195	1.48538e-19	8.61594e-18	CYB561	17	63432304	63446378	-	5320	protein_coding	cytochrome b561 [Source:HGNC Symbol;Acc:HGNC:2571]	Cytochrom_B561	836	678	13992	11091	4.42793	3.99614	132.96	79.6082
ENSG00000171219	132.928	138.367	7187.5	2849.74	-5.20928	1.6616e-19	9.57422e-18	CDC42BPG	11	64823387	64844569	-	6112	protein_coding	CDC42 binding protein kinase gamma [Source:HGNC Symbol;Acc:HGNC:29829]	Pkinase	174	162	5165	2731	0.802181	0.831102	42.7209	17.0623
ENSG00000106211	2607.38	2429.11	242779	55187.5	-5.88658	1.78695e-19	1.02643e-17	HSPB1	7	76302544	76304295	+	1634	protein_coding	heat shock protein family B (small) member 1 [Source:HGNC Symbol;Acc:HGNC:5246]	-	3413	2844	174463	52888	58.856	54.5758	5397.65	1235.96
ENSG00000145911	199.393	169.969	6807.6	3672	-4.8261	1.99416e-19	1.14267e-17	N4BP3	5	178113443	178126087	+	6080	protein_coding	NEDD4 binding protein 3 [Source:HGNC Symbol;Acc:HGNC:29852]	Fez1	261	199	4892	3519	1.2096	1.02629	40.6758	22.1011
ENSG00000109452	104.662	119.576	2308.63	4716.52	-4.96985	2.13342e-19	1.21657e-17	INPP4B	4	142023160	142847432	-	14153	protein_coding	inositol polyphosphate-4-phosphatase type II B [Source:HGNC Symbol;Acc:HGNC:6075]	-	137	140	1659	4520	0.272759	0.310172	5.92586	12.1952
ENSG00000054179	0.763957	1.70823	1405.49	405.913	-9.53996	2.31964e-19	1.31957e-17	ENTPD2	9	137048098	137054045	-	2633	protein_coding	ectonucleoside triphosphate diphosphohydrolase 2 [Source:HGNC Symbol;Acc:HGNC:3364]	-	1	2	1010	389	0.0107018	0.0238178	19.3921	5.64154
ENSG00000224738	64.9363	50.3929	1392.97	1564.17	-4.67941	2.33227e-19	1.32039e-17	AC099850.1	17	59106598	59118267	+	1338	antisense	-	-	85	59	1001	1499	1.79007	1.38267	37.8209	42.7804
ENSG00000175591	91.6748	64.0587	4312.5	1757.22	-5.2834	2.97858e-19	1.67824e-17	P2RY2	11	73218298	73236352	+	2861	protein_coding	purinergic receptor P2Y2 [Source:HGNC Symbol;Acc:HGNC:8541]	7tm_1	120	75	3099	1684	1.18187	0.821989	54.7592	22.4762
ENSG00000186174	501.155	556.884	25346.2	10339.8	-5.0759	3.01477e-19	1.69459e-17	BCL9L	11	118893875	118925608	-	10470	protein_coding	B cell CLL/lymphoma 9 like [Source:HGNC Symbol;Acc:HGNC:23688]	-	656	652	18214	9909	1.76548	1.95265	87.9452	36.1395
ENSG00000186212	6.11165	0.854117	478.703	389.217	-6.92669	3.02756e-19	1.69774e-17	SOWAHB	4	76894928	76898147	-	3220	protein_coding	sosondowah ankyrin repeat domain family member B [Source:HGNC Symbol;Acc:HGNC:32958]	-	8	1	344	373	0.0700068	0.00973793	5.40078	4.42335
ENSG00000130720	24.4466	27.3317	1777.05	665.739	-5.56018	3.60449e-19	2.00223e-17	FIBCD1	9	130902438	130939286	-	3831	protein_coding	fibrinogen C domain containing 1 [Source:HGNC Symbol;Acc:HGNC:25922]	Fibrinogen_C	32	32	1277	638	0.235366	0.261915	16.8513	6.35927
ENSG00000226287	19.8629	22.207	1502.91	570.782	-5.62346	3.71951e-19	2.05645e-17	TMEM191A	22	20701114	20704606	+	2707	transcribed_unprocessed_pseudogene	transmembrane protein 191A (pseudogene) [Source:HGNC Symbol;Acc:HGNC:25317]	-	26	26	1080	547	0.27064	0.301167	20.1692	7.7161
ENSG00000188112	1.52791	0	1340.09	857.739	-10.4216	3.99502e-19	2.20361e-17	C6orf132	6	42101118	42142619	-	6852	protein_coding	chromosome 6 open reading frame 132 [Source:HGNC Symbol;Acc:HGNC:21288]	-	2	0	963	822	0.00822468	0	7.10498	4.58093
ENSG00000158406	21.3908	32.4564	758.41	958.956	-4.99845	4.15938e-19	2.2836e-17	HIST1H4H	6	26277609	26285638	-	2163	protein_coding	histone cluster 1 H4 family member h [Source:HGNC Symbol;Acc:HGNC:4788]	-	28	38	545	919	0.364761	0.550871	12.7378	16.224
ENSG00000125968	413.3	460.369	17902.7	8258.08	-4.90418	4.40596e-19	2.41336e-17	ID1	20	31605283	31606515	+	1233	protein_coding	inhibitor of DNA binding 1, HLH protein [Source:HGNC Symbol;Acc:HGNC:5360]	HLH	541	539	12865	7914	12.3635	13.7072	527.473	245.093
ENSG00000255571	2.29187	1.70823	532.975	328.696	-7.74173	4.52754e-19	2.47422e-17	MIR9-3HG	15	89361579	89398487	+	7265	lincRNA	MIR9-3 host gene [Source:HGNC Symbol;Acc:HGNC:27388]	-	3	2	383	315	0.0116357	0.00863211	2.66512	1.65567
ENSG00000144452	7.63957	11.1035	365.985	661.565	-5.78286	5.03085e-19	2.74292e-17	ABCA12	2	214931542	215138428	-	9416	protein_coding	ATP binding cassette subfamily A member 12 [Source:HGNC Symbol;Acc:HGNC:14637]	ABC_tran	10	13	263	634	0.0299254	0.0432912	1.41203	2.57112
ENSG00000163683	190.989	195.593	3647.33	7169.74	-4.80653	5.56178e-19	3.01845e-17	SMIM14	4	39546330	39639090	-	6721	protein_coding	small integral membrane protein 14 [Source:HGNC Symbol;Acc:HGNC:27321]	-	250	229	2621	6871	1.04812	1.06838	19.7145	39.0378
ENSG00000163191	916.748	824.222	21140.9	15658.4	-4.40166	6.31439e-19	3.41121e-17	S100A11	1	152032506	152047907	-	680	protein_coding	S100 calcium binding protein A11 [Source:HGNC Symbol;Acc:HGNC:10488]	-	1200	965	15192	15006	49.7255	44.4981	1129.43	842.665
ENSG00000128604	12.9873	14.52	805.724	425.739	-5.48485	7.28033e-19	3.90623e-17	IRF5	7	128937612	128950035	+	4375	protein_coding	interferon regulatory factor 5 [Source:HGNC Symbol;Acc:HGNC:6120]	IRF	17	17	579	408	0.109491	0.121841	6.69043	3.56107
novel.30	0	0	2214	1636.17	-13.6612	7.3079e-19	3.91213e-17	-	10	5481587	5494145	-	9559	-	-	-	0	0	1591	1568	0	0	8.41417	6.26372
ENSG00000254531	29.7943	35.0188	2851.35	783.652	-5.80986	8.30637e-19	4.4206e-17	AP001816.1	4	101347780	101348883	+	790	lincRNA	-	-	39	41	2049	751	1.39105	1.62734	131.12	36.3004
ENSG00000138772	32.0862	48.6846	1038.12	1191.65	-4.78924	8.61968e-19	4.56263e-17	ANXA3	4	78551519	78610451	+	5123	protein_coding	annexin A3 [Source:HGNC Symbol;Acc:HGNC:541]	-	42	57	746	1142	0.23101	0.348878	7.36153	8.51218
ENSG00000047644	0.763957	0	5619.2	3507.13	-13.4672	9.4972e-19	5.01588e-17	WWC3	X	10015562	10144478	+	7114	protein_coding	WWC family member 3 [Source:HGNC Symbol;Acc:HGNC:29237]	WW	1	0	4038	3361	0.00396089	0	28.695	18.0407
ENSG00000152137	200.921	209.259	3917.29	4421.22	-4.34555	1.08858e-18	5.69824e-17	HSPB8	12	119178642	119221131	+	2860	protein_coding	heat shock protein family B (small) member 8 [Source:HGNC Symbol;Acc:HGNC:30171]	-	263	245	2815	4237	2.59117	2.6861	49.7584	56.5707
ENSG00000143412	125.289	101.64	5438.29	2241.39	-5.08019	1.25932e-18	6.57746e-17	ANXA9	1	150982017	150995634	+	1826	protein_coding	annexin A9 [Source:HGNC Symbol;Acc:HGNC:547]	-	164	119	3908	2148	2.53075	2.04347	108.195	44.9192
ENSG00000205542	696.728	756.747	12586.8	18965.2	-4.44021	1.34731e-18	7.00602e-17	TMSB4X	X	12975108	12977227	+	1705	protein_coding	thymosin beta 4, X-linked [Source:HGNC Symbol;Acc:HGNC:11881]	-	912	886	9045	18175	15.0722	16.2942	268.187	407.051
ENSG00000181392	20.6268	23.9153	1047.86	558.261	-5.1728	1.75259e-18	9.01419e-17	SYNE4	19	36003299	36008793	-	2536	protein_coding	spectrin repeat containing nuclear envelope family member 4 [Source:HGNC Symbol;Acc:HGNC:26703]	-	27	28	753	535	0.3	0.346203	15.0106	8.0557
ENSG00000183044	272.732	246.84	5244.86	4956.52	-4.29518	1.83523e-18	9.41871e-17	ABAT	16	8674565	8784575	+	9744	protein_coding	4-aminobutyrate aminotransferase [Source:HGNC Symbol;Acc:HGNC:23]	Aminotran_3	357	289	3769	4750	1.03237	0.93	19.5543	18.6147
ENSG00000176463	3.05583	5.97882	491.227	283.826	-6.43523	1.96482e-18	1.00619e-16	SLCO3A1	15	91853695	92172435	+	9435	protein_coding	solute carrier organic anion transporter family member 3A1 [Source:HGNC Symbol;Acc:HGNC:10952]	-	4	7	353	272	0.0119461	0.0232637	1.89141	1.10084
ENSG00000171604	325.445	294.67	9867.69	5435.48	-4.625	2.00649e-18	1.02309e-16	CXXC5	5	139647299	139683882	+	3852	protein_coding	CXXC finger protein 5 [Source:HGNC Symbol;Acc:HGNC:26943]	zf-CXXC	426	345	7091	5209	3.11623	2.80838	93.0625	51.6377
ENSG00000108932	22.1547	20.4988	531.583	1499.48	-5.57353	2.23845e-18	1.13891e-16	SLC16A6	17	68267026	68291267	-	4061	protein_coding	solute carrier family 16 member 6 [Source:HGNC Symbol;Acc:HGNC:10927]	MFS_1	29	24	382	1437	0.20122	0.185311	4.75537	13.5121
ENSG00000101115	46.6013	41.8517	1379.05	934.956	-4.70849	2.48197e-18	1.26009e-16	SALL4	20	51782331	51802520	-	5772	protein_coding	spalt like transcription factor 4 [Source:HGNC Symbol;Acc:HGNC:15924]	zf-C2H2	61	49	991	896	0.29779	0.26619	8.67963	5.92762
ENSG00000181982	1.52791	0.854117	485.661	543.652	-8.73689	2.51223e-18	1.27272e-16	CCDC149	4	24806117	24980204	-	9582	protein_coding	coiled-coil domain containing 149 [Source:HGNC Symbol;Acc:HGNC:25405]	-	2	1	349	521	0.00588139	0.0032724	1.84129	2.07625
ENSG00000187013	9.16748	0.854117	630.385	401.739	-6.65662	2.64107e-18	1.33228e-16	C17orf82	17	61411751	61413280	+	1530	lincRNA	chromosome 17 open reading frame 82 [Source:HGNC Symbol;Acc:HGNC:32699]	-	12	1	453	385	0.221002	0.0204942	14.9679	9.60878
ENSG00000168350	25.9745	27.3317	2208.44	624	-5.73136	3.07492e-18	1.54125e-16	DEGS2	14	100143957	100160163	-	4466	protein_coding	delta 4-desaturase, sphingolipid 2 [Source:HGNC Symbol;Acc:HGNC:20113]	-	34	32	1587	598	0.214519	0.224675	17.9644	5.11306
ENSG00000143502	8.40352	7.68705	503.752	319.304	-5.6744	3.27866e-18	1.63989e-16	SUSD4	1	223220819	223364202	-	4710	protein_coding	sushi domain containing 4 [Source:HGNC Symbol;Acc:HGNC:25470]	Sushi	11	9	362	306	0.0658079	0.0599162	3.88545	2.48084
ENSG00000170075	2.29187	0.854117	677.699	304.696	-8.25876	3.47466e-18	1.73424e-16	GPR37L1	1	202122858	202133592	+	6588	protein_coding	G protein-coupled receptor 37 like 1 [Source:HGNC Symbol;Acc:HGNC:14923]	7tm_1	3	1	487	292	0.0128314	0.00475958	3.73705	1.6925
ENSG00000042286	29.0303	37.5811	1534.91	738.782	-5.09404	3.56085e-18	1.77352e-16	AIFM2	10	70098223	70132934	-	5135	protein_coding	apoptosis inducing factor, mitochondria associated 2 [Source:HGNC Symbol;Acc:HGNC:21411]	Pyr_redox_2	38	44	1103	708	0.208521	0.26868	10.859	5.26492
ENSG00000120262	22.9187	29.8941	619.253	1554.78	-5.36558	3.5829e-18	1.78074e-16	CCDC170	6	151494030	151621193	+	5419	protein_coding	coiled-coil domain containing 170 [Source:HGNC Symbol;Acc:HGNC:21177]	-	30	35	445	1490	0.155994	0.202522	4.1514	10.4994
ENSG00000138496	28.2664	22.207	602.554	1005.91	-4.99279	4.11351e-18	2.03589e-16	PARP9	3	122527924	122564577	-	8938	protein_coding	poly(ADP-ribose) polymerase family member 9 [Source:HGNC Symbol;Acc:HGNC:24118]	A1pp	37	26	433	964	0.116645	0.0912128	2.44907	4.11847
ENSG00000113494	0	0	983.846	2796.52	-13.6353	4.48438e-18	2.21017e-16	PRLR	5	35048756	35230589	-	13108	protein_coding	prolactin receptor [Source:HGNC Symbol;Acc:HGNC:9446]	-	0	0	707	2680	0	0	2.7267	7.80723
ENSG00000100867	103.898	113.597	5029.17	2010.78	-5.01647	4.55127e-18	2.23847e-16	DHRS2	14	23630115	23645639	+	7556	protein_coding	dehydrogenase/reductase 2 [Source:HGNC Symbol;Acc:HGNC:18349]	adh_short	136	133	3614	1927	0.50717	0.551928	24.1796	9.73842
ENSG00000173156	0	0.854117	6141.04	2430.26	-13.3707	4.61723e-18	2.26618e-16	RHOD	11	67056818	67072013	+	1265	protein_coding	ras homolog family member D [Source:HGNC Symbol;Acc:HGNC:670]	Ras	0	1	4413	2329	0	0.0247875	176.359	70.3036
ENSG00000127084	71.8119	57.2258	2849.95	1263.65	-4.99355	4.84812e-18	2.36966e-16	FGD3	9	92947451	93036236	+	5890	protein_coding	FYVE, RhoGEF and PH domain containing 3 [Source:HGNC Symbol;Acc:HGNC:16027]	RhoGEF	94	67	2048	1211	0.449696	0.356683	17.578	7.85105
ENSG00000134595	6.87561	3.41647	438.347	292.174	-6.13532	5.32099e-18	2.59006e-16	SOX3	X	140502985	140505116	-	2132	protein_coding	SRY-box 3 [Source:HGNC Symbol;Acc:HGNC:11199]	HMG_box	9	4	315	280	0.118949	0.0588295	7.46925	5.01499
novel.31	0	0	1760.35	1292.87	-13.3266	5.3428e-18	2.59533e-16	-	10	8868184	8869899	-	1676	-	-	-	0	0	1265	1239	0	0	38.1566	28.229
ENSG00000167964	42.7816	55.5176	2474.23	1000.7	-5.14424	5.97147e-18	2.89475e-16	RAB26	16	2140803	2154165	+	2488	protein_coding	RAB26, member RAS oncogene family [Source:HGNC Symbol;Acc:HGNC:14259]	-	56	65	1778	959	0.634226	0.819192	36.1273	14.7186
ENSG00000198346	1.52791	2.56235	264.4	544.695	-7.64333	6.45711e-18	3.11737e-16	ZNF813	19	53467735	53496255	+	6244	protein_coding	zinc finger protein 813 [Source:HGNC Symbol;Acc:HGNC:33257]	KRAB	2	3	190	522	0.00902555	0.0150654	1.53831	3.19232
ENSG00000266934	4.58374	5.97882	524.625	257.739	-6.21458	7.11753e-18	3.4292e-16	AC005746.1	17	61382785	61384680	+	1329	sense_intronic	-	-	6	7	377	247	0.127213	0.165156	14.3407	7.09693
ENSG00000154274	3.05583	0	335.371	576	-8.16271	7.50487e-18	3.60845e-16	C4orf19	4	37453941	37623495	+	2770	protein_coding	chromosome 4 open reading frame 19 [Source:HGNC Symbol;Acc:HGNC:25618]	-	4	0	241	552	0.0406899	0	4.39836	7.60954
ENSG00000170561	0	0	1898.11	1135.3	-13.3171	7.74728e-18	3.71743e-16	IRX2	5	2745845	2751662	-	3384	protein_coding	iroquois homeobox 2 [Source:HGNC Symbol;Acc:HGNC:14359]	Coprinus_mating	0	0	1364	1088	0	0	20.3769	12.2771
ENSG00000218416	15.2791	16.2282	880.869	409.043	-5.35515	9.55568e-18	4.57587e-16	AC110619.1	2	240449315	240456714	-	3235	processed_transcript	-	-	20	19	633	392	0.174206	0.184163	9.89198	4.62712
ENSG00000162639	0	0	1093.78	1862.61	-13.2805	9.92641e-18	4.74378e-16	HENMT1	1	108648290	108661526	-	2426	protein_coding	HEN methyltransferase 1 [Source:HGNC Symbol;Acc:HGNC:26400]	-	0	0	786	1785	0	0	16.3789	28.0961
ENSG00000154654	0	0.854117	2115.2	5638.95	-13.2264	1.21661e-17	5.77902e-16	NCAM2	21	20998315	21543329	+	8380	protein_coding	neural cell adhesion molecule 2 [Source:HGNC Symbol;Acc:HGNC:7657]	I-set	0	1	1520	5404	0	0.00374178	9.16966	24.6247
ENSG00000128016	42.0176	29.04	1505.69	756.522	-4.99021	1.32332e-17	6.27327e-16	ZFP36	19	39406813	39409412	+	2010	protein_coding	ZFP36 ring finger protein [Source:HGNC Symbol;Acc:HGNC:12862]	zf-CCCH	55	34	1082	725	0.771033	0.530402	27.2135	13.7734
ENSG00000160190	184.114	168.261	4325.03	2926.96	-4.36296	1.44103e-17	6.81762e-16	SLC37A1	21	42496008	42581440	+	6814	protein_coding	solute carrier family 37 member 1 [Source:HGNC Symbol;Acc:HGNC:11024]	MFS_1	241	197	3108	2805	0.996601	0.906539	23.0586	15.7192
ENSG00000132561	37.4339	44.4141	1049.25	864	-4.54767	1.50377e-17	7.08604e-16	MATN2	8	97868840	98036716	+	6933	protein_coding	matrilin 2 [Source:HGNC Symbol;Acc:HGNC:6908]	VWA	49	52	754	828	0.19915	0.235182	5.49799	4.56045
ENSG00000187653	22.9187	11.9576	546.89	619.826	-5.05818	1.84411e-17	8.63803e-16	TMSB4XP8	4	90838903	90839037	-	135	processed_pseudogene	thymosin beta 4, X-linked pseudogene 8 [Source:HGNC Symbol;Acc:HGNC:11885]	-	30	14	393	594	6.26172	3.25175	147.168	168.016
ENSG00000171940	624.916	694.397	10456.3	21276.5	-4.58819	1.91033e-17	8.93051e-16	ZNF217	20	53567065	53609907	-	6181	protein_coding	zinc finger protein 217 [Source:HGNC Symbol;Acc:HGNC:13009]	-	818	813	7514	20390	3.72907	4.12434	61.4563	125.967
ENSG00000169255	0	0	844.688	2234.09	-13.3392	1.97964e-17	9.23624e-16	B3GALNT1	3	161083883	161105384	-	4183	protein_coding	beta-1,3-N-acetylgalactosaminyltransferase 1 (globoside blood group) [Source:HGNC Symbol;Acc:HGNC:918]	Galactosyl_T	0	0	607	2141	0	0	7.33592	19.5446
ENSG00000156127	0	0	2168.08	861.913	-13.3153	1.98469e-17	9.24154e-16	BATF	14	75522425	75547015	+	980	protein_coding	basic leucine zipper ATF-like transcription factor [Source:HGNC Symbol;Acc:HGNC:958]	bZIP_1	0	0	1558	826	0	0	80.3702	32.1849
ENSG00000173193	1.52791	0	592.813	1006.96	-9.96466	2.08567e-17	9.6736e-16	PARP14	3	122680618	122730840	+	10495	protein_coding	poly(ADP-ribose) polymerase family member 14 [Source:HGNC Symbol;Acc:HGNC:29232]	A1pp	2	0	426	965	0.00536975	0	2.05202	3.5111
ENSG00000178568	11.4593	5.97882	377.118	399.652	-5.46777	2.13279e-17	9.83415e-16	ERBB4	2	211375717	212538841	-	13015	protein_coding	erb-b2 receptor tyrosine kinase 4 [Source:HGNC Symbol;Acc:HGNC:3432]	Pkinase_Tyr	15	7	271	383	0.0324753	0.0168646	1.05264	1.12371
ENSG00000142675	13.7512	20.4988	887.827	430.956	-5.26974	2.56449e-17	1.1733e-15	CNKSR1	1	26177403	26189886	+	4043	protein_coding	connector enhancer of kinase suppressor of Ras 1 [Source:HGNC Symbol;Acc:HGNC:19700]	PH	18	24	638	413	0.125451	0.186136	7.97757	3.90072
ENSG00000011347	296.415	250.256	7314.14	4307.48	-4.40976	3.6624e-17	1.65954e-15	SYT7	11	61515313	61581148	-	5953	protein_coding	synaptotagmin 7 [Source:HGNC Symbol;Acc:HGNC:11514]	C2	388	293	5256	4128	1.83655	1.54331	44.6348	26.4791
novel.606	1.52791	17.9364	1391.58	567.652	-6.6696	3.84639e-17	1.73899e-15	-	CHR_HSCHR6_MHC_DBB_CTG1	30881999	30891567	+	3813	-	PF07714:Protein tyrosine kinase	Pkinase_Tyr	2	21	1000	544	0.0147798	0.172693	13.2583	5.44792
ENSG00000157617	4.58374	0	368.768	336	-7.21274	3.85372e-17	1.73899e-15	C2CD2	21	41885112	41953890	-	8602	protein_coding	C2 calcium dependent domain containing 2 [Source:HGNC Symbol;Acc:HGNC:1266]	C2	6	0	265	322	0.0196543	0	1.5574	1.4294
ENSG00000213225	37.4339	20.4988	1372.1	658.435	-5.1274	4.16405e-17	1.86891e-15	NOC2LP1	2	130229379	130232106	+	2728	transcribed_processed_pseudogene	NOC2 like nucleolar associated transcriptional repressor pseudogene 1 [Source:HGNC Symbol;Acc:HGNC:52285]	-	49	24	986	631	0.506125	0.27586	18.272	8.8325
ENSG00000100290	16.0431	18.7906	648.476	430.956	-4.95456	4.26074e-17	1.90507e-15	BIK	22	43110748	43129712	+	953	protein_coding	BCL2 interacting killer [Source:HGNC Symbol;Acc:HGNC:1051]	-	21	22	466	413	0.620916	0.723856	24.7199	16.5484
ENSG00000109062	1213.93	1256.41	30847.1	18354.8	-4.31592	4.68182e-17	2.08938e-15	SLC9A3R1	17	74748652	74769353	+	2315	protein_coding	SLC9A3 regulator 1 [Source:HGNC Symbol;Acc:HGNC:11075]	-	1589	1471	22167	17590	19.341	19.9244	484.072	290.144
ENSG00000124429	10.6954	8.54117	288.057	655.304	-5.61413	5.62996e-17	2.49072e-15	POF1B	X	85277396	85379743	-	4029	protein_coding	POF1B, actin binding protein [Source:HGNC Symbol;Acc:HGNC:13711]	-	14	10	207	628	0.0979123	0.0778261	2.59733	5.95198
ENSG00000272808	2.29187	0	471.745	401.739	-8.5101	5.63388e-17	2.49072e-15	AC015712.6	15	100849831	100865457	+	5068	processed_transcript	-	-	3	0	339	385	0.0166798	0	3.38156	2.90083
ENSG00000268104	0	0	663.783	2270.61	-13.2699	5.91725e-17	2.61111e-15	SLC6A14	X	116436622	116461458	+	4520	protein_coding	solute carrier family 6 member 14 [Source:HGNC Symbol;Acc:HGNC:11047]	SNF	0	0	477	2176	0	0	5.33499	18.3831
ENSG00000135114	3.05583	5.97882	321.455	276.522	-6.06194	6.20509e-17	2.73302e-15	OASL	12	121019111	121039242	-	3517	protein_coding	2'-5'-oligoadenylate synthetase like [Source:HGNC Symbol;Acc:HGNC:8090]	ubiquitin	4	7	231	265	0.0320475	0.0624091	3.32042	2.87722
ENSG00000182107	0	0.854117	2762.28	2451.13	-12.6544	6.73941e-17	2.96283e-15	TMEM30B	14	61277370	61281840	-	4471	protein_coding	transmembrane protein 30B [Source:HGNC Symbol;Acc:HGNC:27254]	-	0	1	1985	2349	0	0.00701323	22.4445	20.0621
ENSG00000124762	515.671	580.799	12344.7	8198.61	-4.22775	6.86988e-17	3.01458e-15	CDKN1A	6	36676460	36687339	+	3050	protein_coding	cyclin dependent kinase inhibitor 1A [Source:HGNC Symbol;Acc:HGNC:1784]	-	675	680	8871	7857	6.23606	6.99088	147.037	98.3684
ENSG00000118596	6.11165	8.54117	211.52	1568.35	-6.92905	6.92917e-17	3.03495e-15	SLC16A7	12	59596067	59789855	+	13665	protein_coding	solute carrier family 16 member 7 [Source:HGNC Symbol;Acc:HGNC:10928]	MFS_1	8	10	152	1503	0.0164963	0.0229463	0.562325	4.19999
ENSG00000242265	55.0049	41.8517	936.533	1197.91	-4.46083	6.99106e-17	3.05639e-15	PEG10	7	94656325	94669695	+	6689	protein_coding	paternally expressed 10 [Source:HGNC Symbol;Acc:HGNC:14005]	-	72	49	673	1148	0.303304	0.229698	5.08637	6.55359
ENSG00000050628	1.52791	1.70823	318.672	339.13	-7.6708	7.61355e-17	3.30406e-15	PTGER3	1	70852353	71047808	-	9653	protein_coding	prostaglandin E receptor 3 [Source:HGNC Symbol;Acc:HGNC:9595]	7tm_1	2	2	229	325	0.00583813	0.00649666	1.1993	1.28564
ENSG00000103260	477.473	461.223	18085	7173.91	-4.74992	7.73455e-17	3.35041e-15	METRN	16	715115	719655	+	3692	protein_coding	meteorin, glial cell differentiation regulator [Source:HGNC Symbol;Acc:HGNC:14151]	-	625	540	12996	6875	4.77007	4.58622	177.952	71.1066
ENSG00000158050	72.5759	71.7458	2986.33	1211.48	-4.86193	8.06715e-17	3.48808e-15	DUSP2	2	96143166	96145440	-	1932	protein_coding	dual specificity phosphatase 2 [Source:HGNC Symbol;Acc:HGNC:3068]	DSPc	95	84	2146	1161	1.38555	1.36331	56.1534	22.9469
ENSG00000124839	0.763957	0	3735	1881.39	-12.7669	8.35965e-17	3.60794e-15	RAB17	2	237574322	237601614	-	4783	protein_coding	RAB17, member RAS oncogene family [Source:HGNC Symbol;Acc:HGNC:16523]	Ras	1	0	2684	1803	0.00589123	0	28.3685	14.3944
ENSG00000102890	98.5504	87.1199	4119.07	1531.83	-4.92717	9.0646e-17	3.90397e-15	ELMO3	16	67199111	67204029	+	2575	protein_coding	engulfment and cell motility 3 [Source:HGNC Symbol;Acc:HGNC:17289]	-	129	102	2960	1468	1.41162	1.24207	58.1123	21.7695
ENSG00000115594	56.5328	78.5787	1187.02	2007.65	-4.56478	9.0786e-17	3.90397e-15	IL1R1	2	102064544	102179874	+	7083	protein_coding	interleukin 1 receptor type 1 [Source:HGNC Symbol;Acc:HGNC:5993]	TIR	74	92	853	1924	0.294389	0.40728	6.08815	10.3726
ENSG00000134830	0	0	1391.58	844.174	-12.8768	9.46208e-17	4.06147e-15	C5AR2	19	47332147	47347327	+	6802	protein_coding	complement component 5a receptor 2 [Source:HGNC Symbol;Acc:HGNC:4527]	7tm_1	0	0	1000	809	0	0	7.43219	4.54162
ENSG00000180921	18.335	25.6235	1052.03	472.696	-5.11796	1.02256e-16	4.36538e-15	FAM83H	8	143723933	143733801	-	5654	protein_coding	family with sequence similarity 83 member H [Source:HGNC Symbol;Acc:HGNC:24797]	-	24	30	756	453	0.119608	0.166375	6.75958	3.05943
ENSG00000196684	1.52791	2.56235	346.503	251.478	-7.20545	1.43229e-16	6.07063e-15	HSH2D	19	16134028	16158575	+	3398	protein_coding	hematopoietic SH2 domain containing [Source:HGNC Symbol;Acc:HGNC:24920]	SH2	2	3	249	241	0.0165849	0.0276835	3.7045	2.70827
ENSG00000151632	0	0	964.364	1034.09	-12.7154	1.52911e-16	6.45783e-15	AKR1C2	10	4987400	5018031	-	6461	protein_coding	aldo-keto reductase family 1 member C2 [Source:HGNC Symbol;Acc:HGNC:385]	Aldo_ket_red	0	0	693	991	0	0	5.42235	5.85697
ENSG00000115221	0	0	857.213	1169.74	-12.736	1.61117e-16	6.79223e-15	ITGB6	2	160099666	160200313	-	4687	protein_coding	integrin subunit beta 6 [Source:HGNC Symbol;Acc:HGNC:6161]	-	0	0	616	1121	0	0	6.64415	9.13292
ENSG00000138356	3.81978	7.68705	282.491	328.696	-5.74416	1.66569e-16	7.00955e-15	AOX1	2	200585868	200677064	+	5556	protein_coding	aldehyde oxidase 1 [Source:HGNC Symbol;Acc:HGNC:553]	Fer2	5	9	203	315	0.025358	0.0507929	1.84709	2.16495
ENSG00000081277	0	0	1438.89	725.217	-12.8297	1.74833e-16	7.34421e-15	PKP1	1	201283452	201332993	+	6211	protein_coding	plakophilin 1 [Source:HGNC Symbol;Acc:HGNC:9023]	Arm	0	0	1034	695	0	0	8.41614	4.27289
ENSG00000145247	0	0	1128.57	860.869	-12.7085	1.80458e-16	7.56707e-15	OCIAD2	4	48885019	48906937	-	2483	protein_coding	OCIA domain containing 2 [Source:HGNC Symbol;Acc:HGNC:28685]	-	0	0	811	825	0	0	16.5119	12.6875
ENSG00000101276	2.29187	1.70823	466.179	211.826	-7.39563	1.85092e-16	7.7476e-15	SLC52A3	20	760080	776015	-	3776	protein_coding	solute carrier family 52 member 3 [Source:HGNC Symbol;Acc:HGNC:16187]	-	3	2	335	203	0.022387	0.0166081	4.48504	2.05288
ENSG00000163704	132.164	135.805	3343.96	2022.26	-4.32364	1.856e-16	7.75514e-15	PRRT3	3	9945542	9952394	-	3939	protein_coding	proline rich transmembrane protein 3 [Source:HGNC Symbol;Acc:HGNC:26591]	-	173	159	2403	1938	1.23756	1.26571	30.8405	18.7874
ENSG00000223523	0.763957	2.56235	258.834	421.565	-7.70999	1.89169e-16	7.8903e-15	AC092598.1	2	188598791	188839445	-	797	sense_overlapping	-	-	1	3	186	404	0.0353548	0.118028	11.798	19.3563
ENSG00000171587	0.763957	0	2966.85	1854.26	-12.5465	1.89868e-16	7.90548e-15	DSCAM	21	40010999	40847139	-	8577	protein_coding	DS cell adhesion molecule [Source:HGNC Symbol;Acc:HGNC:3039]	fn3	1	0	2132	1777	0.00328527	0	12.5662	7.91135
ENSG00000149573	77.1596	57.2258	1174.49	1578.78	-4.35589	1.96052e-16	8.13427e-15	MPZL2	11	118253403	118264536	-	4753	protein_coding	myelin protein zero like 2 [Source:HGNC Symbol;Acc:HGNC:3496]	V-set	101	67	844	1513	0.59877	0.442007	8.97694	12.1554
ENSG00000085552	78.6875	91.3905	3597.23	1363.83	-4.86643	1.9973e-16	8.25782e-15	IGSF9	1	159927039	159945604	-	6628	protein_coding	immunoglobulin superfamily member 9 [Source:HGNC Symbol;Acc:HGNC:18132]	I-set	103	107	2585	1307	0.437886	0.506202	19.7166	7.52995
ENSG00000261888	0.763957	0.854117	839.122	450.782	-9.6419	2.23924e-16	9.19374e-15	AC144831.1	17	83104255	83106910	+	2656	lincRNA	-	-	1	1	603	432	0.0106091	0.0118058	11.4774	6.2109
ENSG00000160211	2127.62	2060.13	86131.8	30282.8	-4.79694	2.46549e-16	1.00876e-14	G6PD	X	154531391	154547572	-	3994	protein_coding	glucose-6-phosphate dehydrogenase [Source:HGNC Symbol;Acc:HGNC:4057]	G6PD_C	2785	2412	61895	29021	19.6482	18.9362	783.432	277.462
ENSG00000177519	26.7385	28.1858	958.798	524.869	-4.75526	2.47809e-16	1.01216e-14	RPRM	2	153477338	153478808	-	1471	protein_coding	reprimo, TP53 dependent G2 arrest mediator homolog [Source:HGNC Symbol;Acc:HGNC:24201]	-	35	33	689	503	0.670443	0.703435	23.6788	13.0573
ENSG00000186493	0	0	1337.31	692.869	-12.7375	2.76528e-16	1.12751e-14	C5orf38	5	2752131	2755397	+	1925	protein_coding	chromosome 5 open reading frame 38 [Source:HGNC Symbol;Acc:HGNC:24226]	-	0	0	961	664	0	0	25.2375	13.1715
ENSG00000177465	4.58374	0	315.888	314.087	-7.05143	2.82746e-16	1.15087e-14	ACOT4	14	73591706	73596496	+	2362	protein_coding	acyl-CoA thioesterase 4 [Source:HGNC Symbol;Acc:HGNC:19748]	-	6	0	227	301	0.0715777	0	4.85847	4.86615
ENSG00000285410	93.9667	100.786	1770.09	1626.78	-4.12463	2.95369e-16	1.20019e-14	GABPB1-IT1	15	50348936	50354861	-	5926	sense_intronic	GABPB1 intronic transcript [Source:HGNC Symbol;Acc:HGNC:25469]	-	123	118	1272	1559	0.584857	0.624371	10.8512	10.0458
ENSG00000230836	2.29187	2.56235	186.472	494.609	-7.1369	3.12786e-16	1.26226e-14	LINC01293	2	74940258	74942670	+	1266	lincRNA	long intergenic non-protein coding RNA 1293 [Source:HGNC Symbol;Acc:HGNC:50362]	-	3	3	134	474	0.0667719	0.0743036	5.35087	14.297
ENSG00000237515	0	0	864.17	967.304	-12.5895	3.16528e-16	1.27302e-14	SHISA9	16	12901620	13240413	+	10155	protein_coding	shisa family member 9 [Source:HGNC Symbol;Acc:HGNC:37231]	-	0	0	621	927	0	0	3.09147	3.48577
novel.428	11.4593	8.54117	359.027	337.043	-5.11682	3.28618e-16	1.31715e-14	-	CHR_HSCHR17_1_CTG2	1572291	1629875	-	6226	-	PF07690:Major Facilitator Superfamily	MFS_1	15	10	258	323	0.0678873	0.0503632	2.0949	1.98104
novel.670	4.58374	5.97882	340.937	230.609	-5.76198	4.66828e-16	1.83988e-14	-	CHR_HSCHR6_MHC_QBL_CTG1	33207935	33218751	-	2751	-	PF08149:BING4CT (NUC141) domain	-	6	7	245	221	0.0614564	0.0797866	4.50225	3.06761
novel.170	9.16748	4.27058	396.6	262.956	-5.60407	4.99182e-16	1.96411e-14	-	6	27825861	27828558	-	2295	-	-	-	12	5	285	252	0.147335	0.068314	6.27792	4.19292
ENSG00000117984	1673.83	1533.14	38254.5	21513.4	-4.22006	5.54064e-16	2.17281e-14	CTSD	11	1752752	1764573	-	3126	protein_coding	cathepsin D [Source:HGNC Symbol;Acc:HGNC:2529]	Asp	2191	1795	27490	20617	19.7497	18.0052	444.569	251.846
ENSG00000108551	16.0431	17.0823	843.297	348.522	-5.16863	5.58824e-16	2.18785e-14	RASD1	17	17494437	17496395	-	1748	protein_coding	ras related dexamethasone induced 1 [Source:HGNC Symbol;Acc:HGNC:15828]	Ras	21	20	606	334	0.33852	0.358766	17.5261	7.29632
novel.24	0.763957	0	823.815	6125.22	-13.0762	5.6888e-16	2.22353e-14	-	10	8867936	8890067	+	7845	-	-	-	1	0	592	5870	0.00359181	0	3.81489	28.5722
ENSG00000085831	113.83	128.117	2991.89	1765.56	-4.29745	5.7369e-16	2.23863e-14	TTC39A	1	51287258	51345116	-	9362	protein_coding	tetratricopeptide repeat domain 39A [Source:HGNC Symbol;Acc:HGNC:18657]	-	149	150	2150	1692	0.44846	0.502395	11.6098	6.90129
ENSG00000165731	181.058	197.301	6429.09	2698.43	-4.59234	5.821e-16	2.26769e-14	RET	10	43077027	43130351	+	6911	protein_coding	ret proto-oncogene [Source:HGNC Symbol;Acc:HGNC:9967]	Pkinase_Tyr	237	231	4620	2586	0.966304	1.04808	33.7952	14.2885
ENSG00000178498	50.4211	55.5176	1825.75	844.174	-4.6554	6.02582e-16	2.33592e-14	DTX3	12	57604622	57609804	+	4087	protein_coding	deltex E3 ubiquitin ligase 3 [Source:HGNC Symbol;Acc:HGNC:24457]	-	66	65	1312	809	0.455036	0.498691	16.2287	7.55862
ENSG00000186603	3.81978	11.9576	684.657	269.217	-5.93072	6.27267e-16	2.42365e-14	HPDL	1	45326905	45328533	+	1629	protein_coding	4-hydroxyphenylpyruvate dioxygenase like [Source:HGNC Symbol;Acc:HGNC:28242]	-	5	14	492	258	0.0864879	0.269482	15.2685	6.0478
ENSG00000106003	33.6141	49.5388	1633.71	722.087	-4.82546	6.40351e-16	2.47016e-14	LFNG	7	2512529	2529177	+	3418	protein_coding	LFNG O-fucosylpeptide 3-beta-N-acetylglucosaminyltransferase [Source:HGNC Symbol;Acc:HGNC:6560]	Fringe	44	58	1174	692	0.362733	0.532082	17.364	7.73095
ENSG00000168398	17.571	19.6447	716.663	385.043	-4.88779	6.49846e-16	2.49862e-14	BDKRB2	14	96204679	96244166	+	6845	protein_coding	bradykinin receptor B2 [Source:HGNC Symbol;Acc:HGNC:1030]	7tm_1	23	23	515	369	0.0946806	0.10536	3.80354	2.0585
ENSG00000180596	9.93143	11.1035	484.269	280.696	-5.18492	6.6089e-16	2.53696e-14	HIST1H2BC	6	26114873	26123926	-	834	protein_coding	histone cluster 1 H2B family member c [Source:HGNC Symbol;Acc:HGNC:4757]	Histone	13	13	348	269	0.439222	0.488765	21.0944	12.3164
ENSG00000168404	5.3477	6.83293	243.526	327.652	-5.55655	6.77986e-16	2.59836e-14	MLKL	16	74671855	74700960	-	5692	protein_coding	mixed lineage kinase domain like pseudokinase [Source:HGNC Symbol;Acc:HGNC:26617]	Pkinase_Tyr	7	8	175	314	0.0346529	0.0440705	1.55427	2.10651
ENSG00000197971	25.2106	15.3741	471.745	611.478	-4.73446	7.00367e-16	2.67979e-14	MBP	18	76978827	77133683	-	18615	protein_coding	myelin basic protein [Source:HGNC Symbol;Acc:HGNC:6925]	-	33	18	339	586	0.0499525	0.0303202	0.920641	1.20208
ENSG00000113205	0	1.70823	617.861	473.739	-9.39072	7.0802e-16	2.70468e-14	PCDHB3	5	141100473	141103827	+	3355	protein_coding	protocadherin beta 3 [Source:HGNC Symbol;Acc:HGNC:8688]	Cadherin	0	2	444	454	0	0.0186922	6.69028	5.16728
ENSG00000148488	3.05583	4.27058	207.345	327.652	-6.19904	7.12682e-16	2.71809e-14	ST8SIA6	10	17318383	17454330	-	2627	protein_coding	ST8 alpha-N-acetyl-neuraminide alpha-2,8-sialyltransferase 6 [Source:HGNC Symbol;Acc:HGNC:23317]	Glyco_transf_29	4	5	149	314	0.0429048	0.0596805	2.86734	4.56424
ENSG00000196507	34.378	21.3529	584.463	766.956	-4.597	7.28992e-16	2.77582e-14	TCEAL3	X	103607451	103629690	+	2305	protein_coding	transcription elongation factor A like 3 [Source:HGNC Symbol;Acc:HGNC:28247]	-	45	25	420	735	0.550108	0.340088	9.21154	12.1763
ENSG00000130701	0	0	1288.6	558.261	-12.6009	8.58046e-16	3.26196e-14	RBBP8NL	20	62410237	62427533	-	2793	protein_coding	RBBP8 N-terminal like [Source:HGNC Symbol;Acc:HGNC:16144]	-	0	0	926	535	0	0	16.7608	7.31445
ENSG00000205890	5.3477	4.27058	331.196	216	-5.82449	9.04594e-16	3.43339e-14	AC108134.1	16	3032481	3039133	+	3061	antisense	-	-	7	5	238	207	0.0644379	0.0512188	3.93068	2.58229
novel.649	0	0	956.015	672	-12.4192	9.99012e-16	3.77959e-14	-	CHR_HSCHR6_MHC_QBL_CTG1	31393600	31405766	+	1714	-	PF00129:Class I Histocompatibility antigen, domains alpha 1 and 2|PF07654:Immunoglobulin C1-set domain	MHC_I	0	0	687	644	0	0	20.2628	14.3474
ENSG00000248663	15.2791	17.0823	471.745	382.956	-4.72382	1.02762e-15	3.88159e-14	LINC00992	5	117415509	117546298	+	1144	lincRNA	long intergenic non-protein coding RNA 992 [Source:HGNC Symbol;Acc:HGNC:48943]	-	20	20	339	367	0.492618	0.548184	14.9805	12.2501
ENSG00000197956	0.763957	0	3037.82	1270.96	-12.3847	1.02935e-15	3.88192e-14	S100A6	1	153534599	153536244	-	971	protein_coding	S100 calcium binding protein A6 [Source:HGNC Symbol;Acc:HGNC:10496]	-	1	0	2183	1218	0.0290193	0	113.655	47.899
ENSG00000143061	1102.39	1133.41	28645.7	14610.8	-4.27403	1.0743e-15	4.03854e-14	IGSF3	1	116574399	116667755	-	7400	protein_coding	immunoglobulin superfamily member 3 [Source:HGNC Symbol;Acc:HGNC:5950]	V-set	1443	1327	20585	14002	5.49466	5.62292	140.628	72.2532
ENSG00000074416	102.37	79.4328	2147.21	1365.91	-4.27142	1.16556e-15	4.36079e-14	MGLL	3	127689062	127823250	-	10102	protein_coding	monoglyceride lipase [Source:HGNC Symbol;Acc:HGNC:17038]	-	134	93	1543	1309	0.373769	0.288668	7.72169	4.94802
ENSG00000173801	1643.27	1643.32	65732.6	22113.4	-4.7403	1.17859e-15	4.40255e-14	JUP	17	41754604	41786931	-	4942	protein_coding	junction plakoglobin [Source:HGNC Symbol;Acc:HGNC:6207]	Arm	2151	1924	47236	21192	12.2643	12.2074	483.197	163.745
ENSG00000177932	3.81978	1.70823	179.514	437.217	-6.78533	1.19366e-15	4.45181e-14	ZNF354C	5	179060415	179083537	+	5411	protein_coding	zinc finger protein 354C [Source:HGNC Symbol;Acc:HGNC:16736]	KRAB	5	2	129	419	0.0260375	0.0115898	1.20522	2.95689
ENSG00000172461	0	1.70823	301.973	1176	-9.82461	1.23214e-15	4.58085e-14	FUT9	6	96015984	96215612	+	13719	protein_coding	fucosyltransferase 9 [Source:HGNC Symbol;Acc:HGNC:4020]	-	0	2	217	1127	0	0.0045712	0.799634	3.1369
ENSG00000183734	0.763957	1.70823	417.474	271.304	-8.14597	1.40399e-15	5.18708e-14	ASCL2	11	2268495	2270952	-	1852	protein_coding	achaete-scute family bHLH transcription factor 2 [Source:HGNC Symbol;Acc:HGNC:739]	HLH	1	2	300	260	0.0152148	0.0338619	8.18906	5.36082
ENSG00000126947	0	0	765.368	744	-12.3103	1.48166e-15	5.44846e-14	ARMCX1	X	101550531	101554700	+	2141	protein_coding	armadillo repeat containing, X-linked 1 [Source:HGNC Symbol;Acc:HGNC:18073]	-	0	0	550	713	0	0	12.9867	12.7166
ENSG00000099994	32.8501	38.4352	2136.07	580.174	-5.25198	1.53628e-15	5.6405e-14	SUSD2	22	24181259	24189110	+	5279	protein_coding	sushi domain containing 2 [Source:HGNC Symbol;Acc:HGNC:30667]	VWD	43	45	1535	556	0.229521	0.26729	14.6998	4.02181
ENSG00000139289	66.4642	49.5388	947.665	1282.43	-4.264	1.59691e-15	5.85403e-14	PHLDA1	12	76025447	76033932	-	8069	protein_coding	pleckstrin homology like domain family A member 1 [Source:HGNC Symbol;Acc:HGNC:8933]	-	87	58	681	1229	0.303813	0.225388	4.26659	5.81609
ENSG00000115339	49.6572	55.5176	802.941	2719.3	-5.06639	1.66812e-15	6.10557e-14	GALNT3	2	165747591	165794682	-	4686	protein_coding	polypeptide N-acetylgalactosaminyltransferase 3 [Source:HGNC Symbol;Acc:HGNC:4125]	Glycos_transf_2	65	65	577	2606	0.390857	0.434944	6.22483	21.2359
ENSG00000042062	13.7512	9.39528	485.661	293.217	-5.06693	1.79665e-15	6.54557e-14	RIPOR3	20	50586108	50691528	-	6009	protein_coding	RIPOR family member 3 [Source:HGNC Symbol;Acc:HGNC:16168]	-	18	11	349	281	0.0844067	0.0574002	2.93614	1.78568
ENSG00000187244	404.897	396.31	16988.4	5381.22	-4.80314	1.82578e-15	6.64143e-14	BCAM	19	44809059	44821421	+	5009	protein_coding	basal cell adhesion molecule (Lutheran blood group) [Source:HGNC Symbol;Acc:HGNC:6722]	V-set	530	464	12208	5157	2.98148	2.90462	123.21	39.3138
ENSG00000131037	38.9618	27.3317	1591.97	561.391	-5.01926	1.88851e-15	6.84853e-14	EPS8L1	19	55072020	55087923	+	5341	protein_coding	EPS8 like 1 [Source:HGNC Symbol;Acc:HGNC:21295]	-	51	32	1144	538	0.269063	0.187867	10.8282	3.84644
ENSG00000125089	0.763957	0.854117	821.032	332.869	-9.48081	2.04979e-15	7.40041e-14	SH3TC1	4	8182072	8241803	+	10593	protein_coding	SH3 domain and tetratricopeptide repeats 1 [Source:HGNC Symbol;Acc:HGNC:26009]	-	1	1	590	319	0.00266004	0.00296008	2.8157	1.14993
ENSG00000243566	0	0	1468.12	396.522	-12.6146	2.51923e-15	9.03859e-14	UPK3B	7	76510428	76516521	+	2660	protein_coding	uroplakin 3B [Source:HGNC Symbol;Acc:HGNC:21444]	-	0	0	1055	380	0	0	20.0505	5.45508
ENSG00000268864	1.52791	0	541.324	427.826	-9.24049	2.99205e-15	1.06701e-13	AC011487.2	19	53599628	53608451	-	2047	transcribed_unprocessed_pseudogene	-	-	2	0	389	410	0.0275308	0	9.60695	7.6483
ENSG00000164128	0	0.854117	1021.42	2889.39	-12.2389	3.13299e-15	1.11224e-13	NPY1R	4	163323961	163344832	-	4180	protein_coding	neuropeptide Y receptor Y1 [Source:HGNC Symbol;Acc:HGNC:7956]	-	0	1	734	2769	0	0.00750147	8.87715	25.2956
ENSG00000163879	1.52791	4.27058	416.082	174.261	-6.69039	3.16153e-15	1.12068e-13	DNALI1	1	37556919	37566857	+	4456	protein_coding	dynein axonemal light intermediate chain 1 [Source:HGNC Symbol;Acc:HGNC:14353]	-	2	5	299	167	0.0126471	0.0351842	3.39219	1.4311
ENSG00000141526	40.4897	44.4141	1459.77	648	-4.63356	3.24045e-15	1.14693e-13	SLC16A3	17	82228397	82261129	+	8995	protein_coding	solute carrier family 16 member 3 [Source:HGNC Symbol;Acc:HGNC:10924]	MFS_1	53	52	1049	621	0.166028	0.18127	5.8956	2.63627
ENSG00000081842	0	0	1007.5	486.261	-12.2947	3.61752e-15	1.27276e-13	PCDHA6	5	140827958	141012344	+	6133	protein_coding	protocadherin alpha 6 [Source:HGNC Symbol;Acc:HGNC:8672]	Cadherin	0	0	724	466	0	0	5.96787	2.90143
ENSG00000132677	0.763957	2.56235	364.594	206.609	-7.45479	3.93995e-15	1.38414e-13	RHBG	1	156369212	156385219	+	3383	protein_coding	Rh family B glycoprotein (gene/pseudogene) [Source:HGNC Symbol;Acc:HGNC:14572]	Ammonium_transp	1	3	262	198	0.00832922	0.0278062	3.91519	2.23492
ENSG00000131669	431.635	490.263	20250.3	5992.69	-4.83117	3.95966e-15	1.389e-13	NINJ1	9	93121489	93134288	-	2648	protein_coding	ninjurin 1 [Source:HGNC Symbol;Acc:HGNC:7824]	-	565	574	14552	5743	6.01225	6.79699	277.817	82.817
ENSG00000174951	0	1.70823	624.819	361.043	-9.24236	4.11787e-15	1.44235e-13	FUT1	19	48748011	48755390	-	4343	protein_coding	fucosyltransferase 1 (H blood group) [Source:HGNC Symbol;Acc:HGNC:4012]	-	0	2	449	346	0	0.0144399	5.22649	3.04218
ENSG00000175707	0	0	1174.49	420.522	-12.3892	4.15802e-15	1.45426e-13	KDF1	1	26949562	26960406	-	1793	protein_coding	keratinocyte differentiation factor 1 [Source:HGNC Symbol;Acc:HGNC:26624]	-	0	0	844	403	0	0	23.7967	8.58269
ENSG00000166509	0	0.854117	1049.25	2537.74	-12.1145	4.22582e-15	1.47579e-13	CLEC3A	16	78022515	78066761	+	3007	protein_coding	C-type lectin domain family 3 member A [Source:HGNC Symbol;Acc:HGNC:2052]	-	0	1	754	2432	0	0.0104277	12.6763	30.8837
ENSG00000006534	67.2282	48.6846	2168.08	860.869	-4.70628	4.32268e-15	1.50738e-13	ALDH3B1	11	68008578	68029282	+	6626	protein_coding	aldehyde dehydrogenase 3 family member B1 [Source:HGNC Symbol;Acc:HGNC:410]	Aldedh	88	57	1558	825	0.374229	0.26974	11.8869	4.75446
ENSG00000170430	0	0.854117	2386.56	1081.04	-12.0651	4.52002e-15	1.57387e-13	MGMT	10	129467184	129768007	+	3557	protein_coding	O-6-methylguanine-DNA methyltransferase [Source:HGNC Symbol;Acc:HGNC:7059]	DNA_binding_1	0	1	1715	1036	0	0.00881533	24.3744	11.1218
ENSG00000130762	126.053	103.348	3812.93	1549.56	-4.54637	4.66747e-15	1.62282e-13	ARHGEF16	1	3454426	3481113	+	5563	protein_coding	Rho guanine nucleotide exchange factor 16 [Source:HGNC Symbol;Acc:HGNC:15515]	RhoGEF	165	121	2740	1485	0.835759	0.682023	24.8998	10.1933
ENSG00000176978	316.278	308.336	10886.3	3967.3	-4.57159	5.03705e-15	1.74875e-13	DPP7	9	137110542	137115177	-	2820	protein_coding	dipeptidyl peptidase 7 [Source:HGNC Symbol;Acc:HGNC:14892]	Peptidase_S28	414	361	7823	3802	4.13673	4.01403	140.242	51.4828
ENSG00000182195	492.752	522.719	20395	6450.78	-4.72444	5.05624e-15	1.75283e-13	LDOC1	X	141175745	141177125	-	1381	protein_coding	LDOC1, regulator of NFKB signaling [Source:HGNC Symbol;Acc:HGNC:6548]	-	645	612	14656	6182	13.1605	13.8957	536.507	170.936
ENSG00000158106	493.516	490.263	18400.8	6209.74	-4.64474	5.18153e-15	1.79115e-13	RHPN1	8	143368887	143384220	+	4172	protein_coding	rhophilin Rho GTPase binding protein 1 [Source:HGNC Symbol;Acc:HGNC:19973]	PDZ	646	574	13223	5951	4.36309	4.3141	160.228	54.4684
ENSG00000246705	421.704	398.018	9153.81	5068.17	-4.11673	5.18195e-15	1.79115e-13	H2AFJ	12	14774383	14778002	+	3356	protein_coding	H2A histone family member J [Source:HGNC Symbol;Acc:HGNC:14456]	-	552	466	6578	4857	4.63472	4.35398	99.089	55.2643
ENSG00000164050	275.788	250.256	9729.92	3367.3	-4.63775	5.44132e-15	1.87531e-13	PLXNB1	3	48403854	48430051	-	9733	protein_coding	plexin B1 [Source:HGNC Symbol;Acc:HGNC:9103]	Sema	361	293	6992	3227	1.04512	0.943938	36.3169	12.6605
ENSG00000274928	0	0	979.672	447.652	-12.229	5.74706e-15	1.97779e-13	KRT89P	12	52341197	52354036	+	1493	transcribed_unprocessed_pseudogene	keratin 89 pseudogene [Source:HGNC Symbol;Acc:HGNC:30196]	Filament	0	0	704	429	0	0	23.8378	10.9723
novel.497	7.63957	14.52	723.621	254.609	-5.4697	5.98209e-15	2.04971e-13	-	CHR_HSCHR19_5_CTG2	867274	881627	-	2868	-	PF11635:Mediator complex subunit 16	-	10	17	520	244	0.0982488	0.185863	9.16596	3.2487
ENSG00000157303	0	0	1220.41	371.478	-12.3864	6.227e-15	2.13054e-13	SUSD3	9	93058688	93085138	+	1263	protein_coding	sushi domain containing 3 [Source:HGNC Symbol;Acc:HGNC:28391]	-	0	0	877	356	0	0	35.1035	10.7633
ENSG00000174567	0	0	826.598	488.348	-12.1108	6.86582e-15	2.34571e-13	GOLT1A	1	204198160	204214092	-	1136	protein_coding	golgi transport 1A [Source:HGNC Symbol;Acc:HGNC:24766]	-	0	0	594	468	0	0	26.4339	15.7314
ENSG00000171631	0	0	1046.47	408	-12.2561	6.95445e-15	2.37255e-13	P2RY6	11	73264505	73298617	+	3976	protein_coding	pyrimidinergic receptor P2Y6 [Source:HGNC Symbol;Acc:HGNC:8543]	7tm_1	0	0	752	391	0	0	9.56148	3.75517
ENSG00000082175	0	0	548.282	707.478	-12.0453	7.1212e-15	2.42594e-13	PGR	11	101029624	101130524	-	15404	protein_coding	progesterone receptor [Source:HGNC Symbol;Acc:HGNC:8910]	Prog_receptor	0	0	394	678	0	0	1.29305	1.68072
ENSG00000101096	16.0431	13.6659	378.509	361.043	-4.63579	7.39323e-15	2.51498e-13	NFATC2	20	51386957	51562831	-	8286	protein_coding	nuclear factor of activated T cells 2 [Source:HGNC Symbol;Acc:HGNC:7776]	RHD	21	16	272	346	0.0714136	0.0605477	1.6595	1.59452
ENSG00000128274	51.1851	32.4564	1800.7	646.956	-4.86875	8.52795e-15	2.88435e-13	A4GALT	22	42692112	42721298	-	3407	protein_coding	alpha 1,4-galactosyltransferase (P blood group) [Source:HGNC Symbol;Acc:HGNC:18149]	Gly_transf_sug	67	38	1294	620	0.554127	0.349731	19.2006	6.94894
ENSG00000182584	3.81978	5.1247	434.173	162.783	-6.06419	8.62321e-15	2.9124e-13	ACTL10	20	33666498	33668525	+	2028	protein_coding	actin like 10 [Source:HGNC Symbol;Acc:HGNC:16127]	Actin	5	6	312	156	0.0694718	0.0927696	7.77751	2.93735
ENSG00000139211	55.0049	40.9976	757.019	1003.83	-4.19602	9.10252e-15	3.06551e-13	AMIGO2	12	47075707	47079951	-	3956	protein_coding	adhesion molecule with Ig like domain 2 [Source:HGNC Symbol;Acc:HGNC:24073]	ig	72	48	544	962	0.512841	0.380459	6.95178	9.28576
ENSG00000135477	0	0	1148.05	354.783	-12.3033	9.2631e-15	3.11514e-13	KRT87P	12	52250466	52258867	-	1778	transcribed_unprocessed_pseudogene	keratin 87 pseudogene [Source:HGNC Symbol;Acc:HGNC:30198]	Filament	0	0	825	340	0	0	23.4572	7.30207
ENSG00000162989	6.87561	17.0823	304.756	546.782	-5.1619	1.01375e-14	3.40437e-13	KCNJ3	2	154698299	154858352	+	5067	protein_coding	potassium voltage-gated channel subfamily J member 3 [Source:HGNC Symbol;Acc:HGNC:6264]	-	9	20	219	524	0.0500493	0.123766	2.18498	3.94893
ENSG00000130045	3.05583	0	293.623	237.913	-7.38389	1.03334e-14	3.4652e-13	NXNL2	9	88535101	88584274	+	2442	protein_coding	nucleoredoxin like 2 [Source:HGNC Symbol;Acc:HGNC:30482]	-	4	0	211	228	0.0461552	0	4.36808	3.56523
ENSG00000170412	220.019	184.489	7296.05	2545.04	-4.60427	1.0683e-14	3.57735e-13	GPRC5C	17	74424851	74451653	+	8005	protein_coding	G protein-coupled receptor class C group 5 member C [Source:HGNC Symbol;Acc:HGNC:13309]	7tm_3	288	216	5243	2439	1.01377	0.846087	33.111	11.6345
ENSG00000142632	51.1851	76.0164	2684.36	901.565	-4.81781	1.12507e-14	3.75149e-13	ARHGEF19	1	16197854	16212609	-	3745	protein_coding	Rho guanine nucleotide exchange factor 19 [Source:HGNC Symbol;Acc:HGNC:26604]	RhoGEF	67	89	1929	864	0.504115	0.745179	26.0396	8.80969
ENSG00000141574	9.16748	5.97882	407.733	211.826	-5.3464	1.16768e-14	3.88261e-13	SECTM1	17	82321024	82334074	-	2961	protein_coding	secreted and transmembrane 1 [Source:HGNC Symbol;Acc:HGNC:10707]	-	12	7	293	203	0.114196	0.074128	5.00245	2.61792
ENSG00000179913	16.807	11.1035	468.962	307.826	-4.79333	1.20351e-14	3.99614e-13	B3GNT3	19	17794828	17813082	+	2301	protein_coding	UDP-GlcNAc:betaGal beta-1,3-N-acetylglucosaminyltransferase 3 [Source:HGNC Symbol;Acc:HGNC:13528]	Galactosyl_T	22	13	337	295	0.269409	0.177153	7.40401	4.89558
ENSG00000179388	3.81978	4.27058	272.749	185.739	-5.82577	1.25231e-14	4.14069e-13	EGR3	8	22687659	22693302	-	4855	protein_coding	early growth response 3 [Source:HGNC Symbol;Acc:HGNC:3240]	-	5	5	196	178	0.0290193	0.0322926	2.04089	1.4
ENSG00000112379	324.682	286.129	4709.1	3873.39	-3.81244	1.38653e-14	4.55896e-13	ARFGEF3	6	138161921	138344663	+	14877	protein_coding	ARFGEF family member 3 [Source:HGNC Symbol;Acc:HGNC:21213]	-	425	335	3384	3712	0.804971	0.706077	11.4992	9.52777
ENSG00000236830	6.87561	7.68705	215.695	321.391	-5.20772	1.54308e-14	5.04556e-13	CBR3-AS1	21	36131767	36175815	-	8459	processed_transcript	CBR3 antisense RNA 1 [Source:HGNC Symbol;Acc:HGNC:43664]	-	9	9	155	308	0.0299799	0.0333615	0.926331	1.39037
ENSG00000196787	35.906	52.1011	798.766	768	-4.1558	1.6775e-14	5.46241e-13	HIST1H2AG	6	27133042	27135291	+	2250	protein_coding	histone cluster 1 H2A family member g [Source:HGNC Symbol;Acc:HGNC:4737]	Histone	47	61	574	736	0.588602	0.8501	12.8968	12.4909
novel.537	0	0	969.93	351.652	-12.1178	1.69784e-14	5.51341e-13	-	CHR_HSCHR22_1_CTG7	24033616	24042101	-	1400	-	PF13417:Glutathione S-transferase, N-terminal domain	-	0	0	697	337	0	0	25.1686	9.1918
ENSG00000142669	142.096	131.534	4873.31	1686.26	-4.58298	1.91907e-14	6.19774e-13	SH3BGRL3	1	26279176	26281522	+	1786	protein_coding	SH3 domain binding glutamate rich protein like 3 [Source:HGNC Symbol;Acc:HGNC:15568]	-	186	154	3502	1616	2.93453	2.70372	99.1262	34.5508
ENSG00000198797	0	0	702.747	437.217	-11.9048	1.94305e-14	6.26661e-13	BRINP2	1	177171497	177282422	+	3953	protein_coding	BMP/retinoic acid inducible neural specific 2 [Source:HGNC Symbol;Acc:HGNC:13746]	-	0	0	505	419	0	0	6.4583	4.04749
ENSG00000196139	0	0	528.8	559.304	-11.8383	1.98889e-14	6.40547e-13	AKR1C3	10	5035354	5107686	+	4532	protein_coding	aldo-keto reductase family 1 member C3 [Source:HGNC Symbol;Acc:HGNC:386]	Aldo_ket_red	0	0	380	536	0	0	4.23884	4.51621
ENSG00000135063	25.9745	27.3317	524.625	493.565	-4.25583	1.99153e-14	6.40547e-13	FAM189A2	9	69324567	69392558	+	9499	protein_coding	family with sequence similarity 189 member A2 [Source:HGNC Symbol;Acc:HGNC:24820]	-	34	32	377	473	0.100857	0.105632	2.0064	1.90144
ENSG00000055118	21.3908	24.7694	990.804	365.217	-4.8766	2.15393e-14	6.90895e-13	KCNH2	7	150944961	150978315	-	5877	protein_coding	potassium voltage-gated channel subfamily H member 2 [Source:HGNC Symbol;Acc:HGNC:6251]	Ion_trans	28	29	712	350	0.134248	0.154727	6.1246	2.27411
ENSG00000005884	142.86	158.866	4782.86	1820.87	-4.4519	2.58689e-14	8.26406e-13	ITGA3	17	50055968	50090481	+	9802	protein_coding	integrin subunit alpha 3 [Source:HGNC Symbol;Acc:HGNC:6139]	FG-GAP	187	186	3437	1745	0.537568	0.595005	17.7263	6.79797
ENSG00000179627	184.877	136.659	5022.21	1994.09	-4.4471	2.6193e-14	8.35629e-13	ZBTB42	14	104800596	104804712	+	3905	protein_coding	zinc finger and BTB domain containing 42 [Source:HGNC Symbol;Acc:HGNC:32550]	BTB	242	160	3609	1911	1.74623	1.28476	46.7218	18.687
ENSG00000165475	74.1038	64.0587	1559.96	906.782	-4.15732	2.69685e-14	8.59206e-13	CRYL1	13	20403666	20525873	-	4327	protein_coding	crystallin lambda 1 [Source:HGNC Symbol;Acc:HGNC:18246]	3HCDH_N	97	75	1121	869	0.631671	0.543497	13.097	7.66888
ENSG00000163017	0	0	775.109	372.522	-11.9142	2.79602e-14	8.89601e-13	ACTG2	2	73892314	73919865	+	3811	protein_coding	actin, gamma 2, smooth muscle, enteric [Source:HGNC Symbol;Acc:HGNC:145]	Actin	0	0	557	357	0	0	7.38873	3.57708
ENSG00000183778	0	2.56235	331.196	235.826	-7.85352	2.82737e-14	8.98366e-13	B3GALT5	21	39556442	39673137	+	14319	protein_coding	beta-1,3-galactosyltransferase 5 [Source:HGNC Symbol;Acc:HGNC:920]	Galactosyl_T	0	3	238	226	0	0.00656948	0.840268	0.602691
ENSG00000212864	77.9236	81.9952	2571.64	1003.83	-4.48246	2.88062e-14	9.14056e-13	RNF208	9	137220247	137221581	-	1150	protein_coding	ring finger protein 208 [Source:HGNC Symbol;Acc:HGNC:25420]	-	102	96	1848	962	2.49924	2.61756	81.2377	31.943
ENSG00000078401	2.29187	1.70823	173.947	268.174	-6.78148	3.1003e-14	9.79811e-13	EDN1	6	12290363	12297194	+	2033	protein_coding	endothelin 1 [Source:HGNC Symbol;Acc:HGNC:3176]	-	3	2	125	257	0.0415806	0.0308472	3.10832	4.82719
ENSG00000196724	7.63957	2.56235	229.611	258.783	-5.56285	3.32301e-14	1.04599e-12	ZNF418	19	57921884	57935393	-	4501	protein_coding	zinc finger protein 418 [Source:HGNC Symbol;Acc:HGNC:20647]	KRAB	10	3	165	248	0.0626033	0.0208994	1.85323	2.10398
ENSG00000176399	8.40352	12.8117	254.659	371.478	-4.88964	3.36293e-14	1.05715e-12	DMRTA1	9	22446841	22455740	+	5569	protein_coding	DMRT like family A1 [Source:HGNC Symbol;Acc:HGNC:13826]	DM	11	15	183	356	0.0556573	0.0844572	1.66122	2.44102
ENSG00000137767	2.29187	0	278.316	266.087	-7.82924	3.38446e-14	1.0625e-12	SQOR	15	45631148	45691294	+	3088	protein_coding	sulfide quinone oxidoreductase [Source:HGNC Symbol;Acc:HGNC:20390]	Pyr_redox_2	3	0	200	255	0.0273748	0	3.27421	3.15327
ENSG00000185052	0	0	556.632	464.348	-11.7461	3.43329e-14	1.07497e-12	SLC24A3	20	19212646	19722937	+	3933	protein_coding	solute carrier family 24 member 3 [Source:HGNC Symbol;Acc:HGNC:10977]	Na_Ca_ex	0	0	400	445	0	0	5.1415	4.32051
ENSG00000106853	12.2233	17.0823	306.147	417.391	-4.6301	3.72606e-14	1.16355e-12	PTGR1	9	111549722	111599855	-	3722	protein_coding	prostaglandin reductase 1 [Source:HGNC Symbol;Acc:HGNC:18429]	ADH_zinc_N	16	20	220	400	0.12113	0.168491	2.98813	4.10376
ENSG00000184845	2.29187	0	246.309	297.391	-7.82812	3.84804e-14	1.19848e-12	DRD1	5	175440039	175444208	-	4054	protein_coding	dopamine receptor D1 [Source:HGNC Symbol;Acc:HGNC:3020]	7tm_1	3	0	177	285	0.0208518	0	2.20721	2.68448
novel.105	0	0	556.632	448.696	-11.7237	3.95804e-14	1.23111e-12	-	2	131543458	131587692	+	4212	-	-	-	0	0	400	430	0	0	4.80093	3.89833
ENSG00000111490	251.342	278.442	3700.21	3314.09	-3.72689	3.97243e-14	1.23396e-12	TBC1D30	12	64781193	64881032	+	8648	protein_coding	TBC1 domain family member 30 [Source:HGNC Symbol;Acc:HGNC:29164]	TBC	329	326	2659	3176	1.07198	1.18202	15.5438	14.0237
ENSG00000100219	2349.17	2265.12	26831	31830.3	-3.66823	4.02525e-14	1.24873e-12	XBP1	22	28794555	28800597	-	3028	protein_coding	X-box binding protein 1 [Source:HGNC Symbol;Acc:HGNC:12801]	bZIP_2	3075	2652	19281	30504	28.6151	27.4625	321.905	384.68
ENSG00000248905	2.29187	1.70823	173.947	256.696	-6.74342	4.10479e-14	1.27173e-12	FMN1	15	32765545	33194733	-	20084	protein_coding	formin 1 [Source:HGNC Symbol;Acc:HGNC:3768]	FH2	3	2	125	246	0.00420899	0.0031225	0.31464	0.467718
ENSG00000185386	80.9794	55.5176	2522.93	893.217	-4.64408	4.33745e-14	1.33854e-12	MAPK11	22	50263713	50270767	-	2688	protein_coding	mitogen-activated protein kinase 11 [Source:HGNC Symbol;Acc:HGNC:6873]	Pkinase	106	65	1813	856	1.11118	0.75824	34.0975	12.1603
ENSG00000102981	26.7385	18.7906	1167.53	349.565	-5.05535	4.5005e-14	1.38705e-12	PARD6A	16	67660946	67662778	+	1488	protein_coding	par-6 family cell polarity regulator alpha [Source:HGNC Symbol;Acc:HGNC:15943]	PDZ	35	22	839	335	0.662783	0.463599	28.5045	8.59688
ENSG00000167306	186.405	202.426	3210.37	2292.52	-3.82296	5.12892e-14	1.57456e-12	MYO5B	18	49822813	50195093	-	10488	protein_coding	myosin VB [Source:HGNC Symbol;Acc:HGNC:7603]	Myosin_head	244	237	2307	2197	0.655547	0.708563	11.1201	7.99901
ENSG00000235027	12.9873	15.3741	606.728	255.652	-4.92666	5.19092e-14	1.59152e-12	AC068580.3	11	1760348	1762486	+	2015	antisense	-	-	17	18	436	245	0.237728	0.280104	10.9387	4.64291
ENSG00000104689	0	0	602.554	389.217	-11.7038	5.42986e-14	1.65722e-12	TNFRSF10A	8	23190452	23225126	-	2951	protein_coding	TNF receptor superfamily member 10a [Source:HGNC Symbol;Acc:HGNC:11904]	Death	0	0	433	373	0	0	7.41775	4.82657
ENSG00000120875	206.268	198.155	3416.33	2342.61	-3.83168	5.82226e-14	1.76447e-12	DUSP4	8	29333064	29350668	-	7257	protein_coding	dual specificity phosphatase 4 [Source:HGNC Symbol;Acc:HGNC:3070]	DSPc	270	232	2455	2245	1.04837	1.00243	17.102	11.8129
ENSG00000008323	0.763957	0	1534.91	823.304	-11.5148	6.14706e-14	1.85813e-12	PLEKHG6	12	6310436	6328506	+	4260	protein_coding	pleckstrin homology and RhoGEF domain containing G6 [Source:HGNC Symbol;Acc:HGNC:25562]	RhoGEF	1	0	1103	789	0.0066145	0	13.0894	7.07239
ENSG00000115380	80.9794	104.202	1824.36	1159.3	-4.01041	6.5945e-14	1.9807e-12	EFEMP1	2	55865967	55924139	-	3962	protein_coding	EGF containing fibulin extracellular matrix protein 1 [Source:HGNC Symbol;Acc:HGNC:3218]	EGF_CA	106	122	1311	1111	0.753872	0.965535	16.7279	10.7078
ENSG00000156049	1.52791	5.1247	249.093	183.652	-6.04753	6.72024e-14	2.0159e-12	GNA14	9	77423079	77648307	-	2721	protein_coding	G protein subunit alpha 14 [Source:HGNC Symbol;Acc:HGNC:4382]	G-alpha	2	6	179	176	0.0207113	0.0691425	3.32566	2.46992
ENSG00000169047	447.679	426.204	11537.6	4798.96	-4.22441	6.83444e-14	2.04756e-12	IRS1	2	226731317	226799759	-	9953	protein_coding	insulin receptor substrate 1 [Source:HGNC Symbol;Acc:HGNC:6125]	PH	586	499	8291	4599	1.65901	1.57206	42.1121	17.6445
ENSG00000146038	4.58374	12.8117	192.038	795.13	-5.83835	7.13874e-14	2.13601e-12	DCDC2	6	24171756	24358052	-	4996	protein_coding	doublecortin domain containing 2 [Source:HGNC Symbol;Acc:HGNC:18141]	-	6	15	138	762	0.0338404	0.0941437	1.3964	5.82413
ENSG00000041353	21.3908	22.207	311.714	1283.48	-5.19445	7.19068e-14	2.14883e-12	RAB27B	18	54717860	54895516	+	7432	protein_coding	RAB27B, member RAS oncogene family [Source:HGNC Symbol;Acc:HGNC:9767]	-	28	26	224	1230	0.106159	0.109696	1.52369	6.31973
ENSG00000163637	66.4642	48.6846	763.977	1311.65	-4.1713	7.42217e-14	2.21507e-12	PRICKLE2	3	64092242	64445476	-	14747	protein_coding	prickle planar cell polarity protein 2 [Source:HGNC Symbol;Acc:HGNC:20340]	LIM	87	57	549	1257	0.166235	0.121198	1.88201	3.25485
ENSG00000185340	170.362	212.675	7258.48	2194.43	-4.62525	7.61056e-14	2.2657e-12	GAS2L1	22	29306582	29312785	+	4481	protein_coding	growth arrest specific 2 like 1 [Source:HGNC Symbol;Acc:HGNC:16955]	CH	223	249	5216	2103	1.40229	1.7424	58.8459	17.921
ENSG00000131149	2138.31	2066.11	32859.4	22644.5	-3.72259	8.51283e-14	2.51528e-12	GSE1	16	85169525	85676204	+	13387	protein_coding	Gse1 coiled-coil protein [Source:HGNC Symbol;Acc:HGNC:28979]	-	2799	2419	23613	21701	5.8915	5.66598	89.1706	61.9007
ENSG00000176532	6.11165	11.1035	250.484	280.696	-4.95636	8.73466e-14	2.5776e-12	PRR15	7	29563811	29567295	+	1982	protein_coding	proline rich 15 [Source:HGNC Symbol;Acc:HGNC:22310]	-	8	13	180	269	0.113735	0.205666	4.59116	5.1826
ENSG00000250312	0	0	427.215	469.565	-11.5594	9.01496e-14	2.65699e-12	ZNF718	4	124480	202303	+	4921	protein_coding	zinc finger protein 718 [Source:HGNC Symbol;Acc:HGNC:26889]	-	0	0	307	450	0	0	3.15383	3.49187
ENSG00000157992	13.7512	11.1035	456.438	242.087	-4.809	9.03375e-14	2.65921e-12	KRTCAP3	2	27442366	27446481	+	1403	protein_coding	keratinocyte associated protein 3 [Source:HGNC Symbol;Acc:HGNC:28943]	-	18	13	328	232	0.361511	0.290542	11.8187	6.31436
novel.46	3.81978	4.27058	247.701	166.956	-5.68066	9.41078e-14	2.76675e-12	-	12	131232569	131235412	-	2844	-	-	-	5	5	178	160	0.049539	0.0551268	3.16406	2.14827
ENSG00000130303	6.11165	0	360.419	192	-6.45508	9.50558e-14	2.79114e-12	BST2	19	17402939	17405648	-	1119	protein_coding	bone marrow stromal cell antigen 2 [Source:HGNC Symbol;Acc:HGNC:1119]	-	8	0	259	184	0.20145	0	11.701	6.27894
ENSG00000261226	2.29187	7.68705	442.522	161.739	-5.93705	9.6864e-14	2.83718e-12	AC092384.3	16	88936779	88939651	-	2873	sense_intronic	-	-	3	9	318	155	0.0294233	0.0982267	5.59558	2.06013
novel.176	12.2233	10.2494	210.128	572.869	-5.12236	9.76967e-14	2.85448e-12	-	7	8351727	8362087	+	10361	-	PF02994:L1 transposable element RBD-like domain|PF17490:L1 transposable element dsRBD-like domain|PF17489:L1 transposable element trimerization domain|PF03372:Endonuclease/Exonuclease/phosphatase family	Transposase_22	16	12	151	549	0.0435136	0.0363163	0.736765	2.02334
novel.90	1.52791	2.56235	201.779	193.043	-6.60689	9.79143e-14	2.85731e-12	-	18	13163518	13166146	-	2012	-	-	-	2	3	145	185	0.0280097	0.0467537	3.64329	3.51109
ENSG00000186187	556.16	522.719	8464.97	5857.04	-3.73055	1.11201e-13	3.22908e-12	ZNRF1	16	74999030	75110994	+	8824	protein_coding	zinc and ring finger 1 [Source:HGNC Symbol;Acc:HGNC:18452]	-	728	612	6083	5613	2.32473	2.17475	34.8503	24.29
ENSG00000229689	0	0	556.632	346.435	-11.5685	1.1657e-13	3.38081e-12	AC009237.3	2	95525345	95532405	+	4978	transcribed_unprocessed_pseudogene	-	-	0	0	400	332	0	0	4.06218	2.54672
ENSG00000184867	0	1.70823	318.672	355.826	-8.69619	1.20703e-13	3.49639e-12	ARMCX2	X	101655281	101659891	-	3589	protein_coding	armadillo repeat containing, X-linked 2 [Source:HGNC Symbol;Acc:HGNC:16869]	-	0	2	229	341	0	0.0174735	3.22564	3.6281
ENSG00000087085	54.2409	54.6635	1544.65	664.695	-4.34194	1.33689e-13	3.85362e-12	ACHE	7	100889994	100896974	-	3783	protein_coding	acetylcholinesterase (Cartwright blood group) [Source:HGNC Symbol;Acc:HGNC:108]	COesterase	71	64	1110	637	0.528845	0.530477	14.8334	6.42987
ENSG00000110436	5.3477	0.854117	189.255	243.13	-6.0916	1.37558e-13	3.96033e-12	SLC1A2	11	35251205	35420063	-	22835	protein_coding	solute carrier family 1 member 2 [Source:HGNC Symbol;Acc:HGNC:10940]	SDF	7	1	136	233	0.00863781	0.00137316	0.301087	0.389631
ENSG00000100373	0	0.854117	1817.4	583.304	-11.5338	1.45156e-13	4.16891e-12	UPK3A	22	45284982	45295874	+	1051	protein_coding	uroplakin 3A [Source:HGNC Symbol;Acc:HGNC:12580]	-	0	1	1306	559	0	0.0298346	62.8195	20.3099
ENSG00000270885	3.05583	4.27058	353.461	132.522	-6.05633	1.48634e-13	4.26243e-12	RASL10B	17	35731649	35743521	+	3502	protein_coding	RAS like family 10 member B [Source:HGNC Symbol;Acc:HGNC:30295]	Ras	4	5	254	127	0.0321848	0.0447689	3.66667	1.3848
ENSG00000170745	5.3477	8.54117	282.491	198.261	-5.11981	1.48773e-13	4.26243e-12	KCNS3	2	17877847	18361616	+	3131	protein_coding	potassium voltage-gated channel modifier subfamily S member 3 [Source:HGNC Symbol;Acc:HGNC:6302]	-	7	10	203	190	0.0629972	0.100147	3.27768	2.31723
ENSG00000198133	57.2967	47.8305	1338.7	654.261	-4.24346	1.53772e-13	4.40031e-12	TMEM229B	14	67447084	67533739	-	6377	protein_coding	transmembrane protein 229B [Source:HGNC Symbol;Acc:HGNC:20130]	-	75	56	962	627	0.331399	0.275356	7.62627	3.75448
ENSG00000170832	1426.31	1351.21	14814.7	19807.3	-3.63983	1.57928e-13	4.51376e-12	USP32	17	60179094	60422470	-	7755	protein_coding	ubiquitin specific peptidase 32 [Source:HGNC Symbol;Acc:HGNC:19143]	UCH	1867	1582	10646	18982	6.78374	6.39657	69.3998	93.4671
ENSG00000273983	0	0	346.503	505.043	-11.4852	1.619e-13	4.62169e-12	HIST1H3G	6	26269405	26271815	-	2411	protein_coding	histone cluster 1 H3 family member g [Source:HGNC Symbol;Acc:HGNC:4772]	Histone	0	0	249	484	0	0	5.22103	7.66561
ENSG00000244242	3.81978	0.854117	267.183	157.565	-6.4725	1.62317e-13	4.628e-12	IFITM10	11	1732410	1750591	-	4784	protein_coding	interferon induced transmembrane protein 10 [Source:HGNC Symbol;Acc:HGNC:40022]	-	5	1	192	151	0.02945	0.00655438	2.02891	1.20527
ENSG00000099282	472.889	391.185	10738.8	4603.82	-4.15007	1.63522e-13	4.65674e-12	TSPAN15	10	69451473	69507669	+	2646	protein_coding	tetraspanin 15 [Source:HGNC Symbol;Acc:HGNC:23298]	Tetraspannin	619	458	7717	4412	6.59185	5.42748	147.439	63.6714
novel.69	1.52791	0	346.503	315.13	-8.69043	1.67765e-13	4.76606e-12	-	16	89201963	89204778	+	2069	-	-	-	2	0	249	302	0.027238	0	6.08405	5.57372
ENSG00000145103	0	1.70823	505.143	230.609	-8.81822	1.83496e-13	5.20045e-12	ILDR1	3	121987323	122022258	-	3006	protein_coding	immunoglobulin like domain containing receptor 1 [Source:HGNC Symbol;Acc:HGNC:28741]	-	0	2	363	221	0	0.0208624	6.1048	2.80739
ENSG00000110375	0	0.854117	1711.64	561.391	-11.455	2.04916e-13	5.76283e-12	UPK2	11	118925164	118958559	+	1106	protein_coding	uroplakin 2 [Source:HGNC Symbol;Acc:HGNC:12579]	-	0	1	1230	538	0	0.0283509	56.2217	18.5749
ENSG00000159216	129.873	128.117	1930.12	1496.35	-3.73115	2.11124e-13	5.92653e-12	RUNX1	21	34787801	36004667	-	15574	protein_coding	runt related transcription factor 1 [Source:HGNC Symbol;Acc:HGNC:10471]	-	170	150	1387	1434	0.307578	0.302005	4.50225	3.51599
ENSG00000173175	121.469	127.263	3559.66	1357.56	-4.30497	2.12341e-13	5.95363e-12	ADCY5	3	123282296	123449758	-	8873	protein_coding	adenylate cyclase 5 [Source:HGNC Symbol;Acc:HGNC:236]	Guanylate_cyc	159	149	2558	1301	0.504932	0.526548	14.5742	5.59894
ENSG00000130958	3.05583	5.1247	172.556	221.217	-5.60068	2.2046e-13	6.1666e-12	SLC35D2	9	96320706	96383710	-	2203	protein_coding	solute carrier family 35 member D2 [Source:HGNC Symbol;Acc:HGNC:20799]	-	4	6	124	212	0.0511625	0.0854003	2.84552	3.67469
ENSG00000272079	6.11165	9.39528	180.905	368.348	-5.15436	2.27378e-13	6.34508e-12	AC004233.3	16	3006120	3007388	+	1269	lincRNA	-	-	8	11	130	353	0.177638	0.271803	5.17888	10.6221
ENSG00000173442	178.002	166.553	3318.92	1854.26	-3.90795	2.29188e-13	6.38052e-12	EHBP1L1	11	65576038	65592650	+	6741	protein_coding	EH domain binding protein 1 like 1 [Source:HGNC Symbol;Acc:HGNC:30682]	CH	233	195	2385	1777	0.973953	0.907053	17.8862	10.0661
ENSG00000124145	550.049	574.82	6800.65	6458.09	-3.55913	2.31677e-13	6.44219e-12	SDC4	20	45325288	45348424	-	2613	protein_coding	syndecan 4 [Source:HGNC Symbol;Acc:HGNC:10661]	-	720	673	4887	6189	7.76425	8.07604	94.5489	90.444
ENSG00000095303	2.29187	4.27058	256.051	146.087	-5.94934	2.81135e-13	7.73548e-12	PTGS1	9	122370530	122395703	+	5791	protein_coding	prostaglandin-endoperoxide synthase 1 [Source:HGNC Symbol;Acc:HGNC:9604]	An_peroxidase	3	5	184	140	0.0145974	0.0270732	1.60627	0.923152
ENSG00000172551	0	0	552.457	281.739	-11.4538	2.82854e-13	7.76889e-12	MUCL1	12	54830519	54858393	+	1250	protein_coding	mucin like 1 [Source:HGNC Symbol;Acc:HGNC:30588]	-	0	0	397	270	0	0	16.0559	8.24807
novel.163	4.58374	21.3529	404.949	453.913	-5.0621	2.93697e-13	8.04361e-12	-	5	178056646	178078945	-	20080	-	-	-	6	25	291	435	0.00841965	0.039039	0.732627	0.827226
ENSG00000118777	61.8805	71.7458	794.592	1286.61	-3.96205	2.96521e-13	8.10761e-12	ABCG2	4	88090264	88231322	-	5044	protein_coding	ATP binding cassette subfamily G member 2 (Junior blood group) [Source:HGNC Symbol;Acc:HGNC:74]	ABC2_membrane	81	84	571	1233	0.452498	0.522188	5.72288	9.33441
ENSG00000136048	161.959	152.033	1675.46	3073.04	-3.91881	2.9672e-13	8.10761e-12	DRAM1	12	101877351	102012130	+	4180	protein_coding	DNA damage regulated autophagy modulator 1 [Source:HGNC Symbol;Acc:HGNC:25645]	-	212	178	1204	2945	1.42911	1.33526	14.5614	26.9034
ENSG00000233913	587.483	572.258	13928.3	5863.3	-4.09294	3.01948e-13	8.2219e-12	RPL10P9	5	168616352	168616996	+	645	processed_pseudogene	ribosomal protein L10 pseudogene 9 [Source:HGNC Symbol;Acc:HGNC:35579]	-	769	670	10009	5619	33.5949	32.5715	784.485	332.658
ENSG00000249158	0.763957	0	1558.57	547.826	-11.3521	3.10411e-13	8.42286e-12	PCDHA11	5	140868183	141012344	+	6284	protein_coding	protocadherin alpha 11 [Source:HGNC Symbol;Acc:HGNC:8665]	Cadherin	1	0	1120	525	0.00448405	0	9.01022	3.19023
ENSG00000183566	1.52791	0.854117	186.472	265.043	-7.54962	3.10755e-13	8.42286e-12	BPIFA4P	20	33193585	33210462	+	1725	transcribed_unprocessed_pseudogene	BPI fold containing family A member 4, pseudogene [Source:HGNC Symbol;Acc:HGNC:20469]	-	2	1	134	254	0.0326699	0.0181775	3.92708	5.62268
ENSG00000188157	1912.18	1693.71	68467.1	18157.6	-4.58632	3.20355e-13	8.66317e-12	AGRN	1	1020123	1056118	+	10758	protein_coding	agrin [Source:HGNC Symbol;Acc:HGNC:329]	Laminin_EGF	2503	1983	49201	17401	6.55595	5.77981	231.204	61.7649
ENSG00000183161	23.6827	5.97882	347.895	656.348	-5.07211	3.25393e-13	8.78933e-12	FANCF	11	22622519	22626787	-	4269	protein_coding	Fanconi anemia complementation group F [Source:HGNC Symbol;Acc:HGNC:3587]	-	31	7	250	629	0.204617	0.0514155	2.96052	5.62631
ENSG00000172818	0	0.854117	1398.54	564.522	-11.2437	3.84442e-13	1.0337e-11	OVOL1	11	65787022	65797219	+	3849	protein_coding	ovo like transcriptional repressor 1 [Source:HGNC Symbol;Acc:HGNC:8525]	-	0	1	1005	541	0	0.00814657	13.1999	5.3672
ENSG00000175505	9.93143	7.68705	365.985	186.783	-4.9664	3.95255e-13	1.06157e-11	CLCF1	11	67364168	67374177	-	1975	protein_coding	cardiotrophin like cytokine factor 1 [Source:HGNC Symbol;Acc:HGNC:17412]	-	13	9	263	179	0.185474	0.142889	6.73197	3.46087
ENSG00000168743	297.179	332.251	3330.05	4495.3	-3.63621	4.14937e-13	1.11064e-11	NPNT	4	105894775	106004027	+	6117	protein_coding	nephronectin [Source:HGNC Symbol;Acc:HGNC:27405]	EGF_CA	389	389	2393	4308	1.79192	1.99404	19.7769	26.8928
ENSG00000128165	0	1.70823	498.185	203.478	-8.749	4.20937e-13	1.12496e-11	ADM2	22	50481556	50486440	+	4276	protein_coding	adrenomedullin 2 [Source:HGNC Symbol;Acc:HGNC:28898]	-	0	2	358	195	0	0.0146661	4.23252	1.74139
ENSG00000256771	0.763957	1.70823	101.585	611.478	-8.1956	4.21239e-13	1.12496e-11	ZNF253	19	19865886	19894674	+	3626	protein_coding	zinc finger protein 253 [Source:HGNC Symbol;Acc:HGNC:13497]	KRAB	1	2	73	586	0.00777103	0.0172952	1.01777	6.17119
ENSG00000163636	3484.41	3636.83	38052.7	41910.2	-3.48914	4.6551e-13	1.23898e-11	PSMD6	3	64010549	64024010	-	9123	protein_coding	proteasome 26S subunit, non-ATPase 6 [Source:HGNC Symbol;Acc:HGNC:9564]	-	4561	4258	27345	40164	14.0873	14.6349	151.528	168.112
ENSG00000103253	221.547	251.964	8325.82	2402.09	-4.50178	4.67248e-13	1.24221e-11	HAGHL	16	726936	735525	+	4890	protein_coding	hydroxyacylglutathione hydrolase like [Source:HGNC Symbol;Acc:HGNC:14177]	-	290	295	5983	2302	1.67107	1.89163	61.8534	17.9761
ENSG00000163840	34.378	31.6023	400.775	1255.3	-4.65003	4.82611e-13	1.28161e-11	DTX3L	3	122564238	122575203	+	5868	protein_coding	deltex E3 ubiquitin ligase 3L [Source:HGNC Symbol;Acc:HGNC:30323]	-	45	37	288	1203	0.216087	0.197713	2.48117	7.82842
ENSG00000101188	4.58374	4.27058	275.533	140.87	-5.55207	5.38602e-13	1.42708e-11	NTSR1	20	62708837	62762771	+	4237	protein_coding	neurotensin receptor 1 [Source:HGNC Symbol;Acc:HGNC:8039]	7tm_1	6	5	198	135	0.0399024	0.0370028	2.36244	1.21667
ENSG00000130193	592.83	615.818	16021.2	5926.95	-4.18258	5.49224e-13	1.4536e-11	THEM6	8	142727203	142736927	+	3055	protein_coding	thioesterase superfamily member 6 [Source:HGNC Symbol;Acc:HGNC:29656]	-	776	721	11513	5680	7.15743	7.40025	190.516	70.9963
ENSG00000136826	116.121	93.9528	1566.92	1217.74	-3.72785	5.71386e-13	1.50887e-11	KLF4	9	107484852	107490482	-	3659	protein_coding	Kruppel like factor 4 [Source:HGNC Symbol;Acc:HGNC:6348]	zf-C2H2	152	110	1126	1167	1.17054	0.942655	15.5571	12.1789
ENSG00000168899	0.763957	1.70823	413.299	128.348	-7.79635	5.77126e-13	1.52232e-11	VAMP5	2	85584408	85593412	+	819	protein_coding	vesicle associated membrane protein 5 [Source:HGNC Symbol;Acc:HGNC:12646]	-	1	2	297	123	0.0344051	0.0765718	18.3327	5.73482
ENSG00000081853	0	0	403.558	299.478	-11.2075	6.49509e-13	1.70373e-11	PCDHGA2	5	141338760	141512979	+	6724	protein_coding	protocadherin gamma subfamily A, 2 [Source:HGNC Symbol;Acc:HGNC:8700]	Cadherin	0	0	290	287	0	0	2.18034	1.62987
ENSG00000267886	0	0	420.257	288	-11.218	6.59241e-13	1.72543e-11	AC074135.1	19	23075201	23100361	+	967	lincRNA	-	-	0	0	302	276	0	0	15.7883	10.8989
ENSG00000172927	3.81978	1.70823	288.057	125.217	-6.20434	6.75651e-13	1.76642e-11	MYEOV	11	69294138	69367726	+	3760	protein_coding	myeloma overexpressed [Source:HGNC Symbol;Acc:HGNC:7563]	-	5	2	207	120	0.0374704	0.0166788	2.78315	1.21869
ENSG00000171522	7.63957	9.39528	257.442	207.652	-4.77334	6.83088e-13	1.78389e-11	PTGER4	5	40679498	40693735	+	3961	protein_coding	prostaglandin E receptor 4 [Source:HGNC Symbol;Acc:HGNC:9596]	7tm_1	10	11	185	199	0.071138	0.0870784	2.36113	1.91843
ENSG00000135480	0	0.854117	1259.38	525.913	-11.1068	7.10517e-13	1.85347e-11	KRT7	12	52232520	52252186	+	4093	protein_coding	keratin 7 [Source:HGNC Symbol;Acc:HGNC:6445]	Filament	0	1	905	504	0	0.00766092	11.1779	4.70205
ENSG00000075223	388.09	409.122	3888.07	8652.52	-3.97563	7.27717e-13	1.89624e-11	SEMA3C	7	80742538	80922359	-	6268	protein_coding	semaphorin 3C [Source:HGNC Symbol;Acc:HGNC:10725]	Sema	508	479	2794	8292	2.28371	2.39623	22.5347	50.516
ENSG00000171346	0	0	463.396	256.696	-11.2416	7.51699e-13	1.95442e-11	KRT15	17	41513743	41522529	-	7069	protein_coding	keratin 15 [Source:HGNC Symbol;Acc:HGNC:6421]	Filament	0	0	333	246	0	0	2.38144	1.32885
ENSG00000262943	4.58374	5.97882	253.267	155.478	-5.27748	7.67204e-13	1.98827e-11	ALOX12P2	17	6853861	6954107	+	5655	transcribed_unprocessed_pseudogene	arachidonate 12-lipoxygenase pseudogene 2 [Source:HGNC Symbol;Acc:HGNC:432]	-	6	7	182	149	0.0298968	0.038814	1.62702	1.00613
ENSG00000172478	0	0	514.884	233.739	-11.2974	7.67244e-13	1.98827e-11	C2orf54	2	240886048	240896889	-	2772	protein_coding	chromosome 2 open reading frame 54 [Source:HGNC Symbol;Acc:HGNC:26216]	-	0	0	370	224	0	0	6.7478	3.0857
novel.442	0	0.854117	1088.21	555.13	-10.9876	9.11366e-13	2.34629e-11	-	CHR_HSCHR17_1_CTG9	83077545	83098679	+	7063	-	-	-	0	1	782	532	0	0.00443949	5.59721	2.87621
ENSG00000178814	0.763957	0	1572.48	405.913	-11.262	9.24576e-13	2.3758e-11	OPLAH	8	144051266	144063965	-	4452	protein_coding	5-oxoprolinase, ATP-hydrolysing [Source:HGNC Symbol;Acc:HGNC:8149]	Hydantoinase_B	1	0	1130	389	0.00632924	0	12.8315	3.33652
ENSG00000128833	446.151	399.727	4261.01	5786.09	-3.57018	9.24839e-13	2.3758e-11	MYO5C	15	52192322	52295798	-	10045	protein_coding	myosin VC [Source:HGNC Symbol;Acc:HGNC:7604]	Myosin_head	584	468	3062	5545	1.63821	1.46089	15.4102	21.079
ENSG00000129682	3.81978	5.97882	185.08	188.87	-5.26285	9.59377e-13	2.45917e-11	FGF13	X	138614731	139222777	-	20681	protein_coding	fibroblast growth factor 13 [Source:HGNC Symbol;Acc:HGNC:3670]	-	5	7	133	181	0.00681247	0.0106133	0.325113	0.3342
ENSG00000170345	26.7385	23.9153	836.339	322.435	-4.51401	9.64987e-13	2.47017e-11	FOS	14	75278774	75282230	+	3238	protein_coding	Fos proto-oncogene, AP-1 transcription factor subunit [Source:HGNC Symbol;Acc:HGNC:3796]	bZIP_1	35	28	601	309	0.304577	0.271146	9.38321	3.64402
ENSG00000131650	79.4515	94.8069	1568.31	947.478	-3.8518	9.65762e-13	2.47017e-11	KREMEN2	16	2963944	2968383	+	2614	protein_coding	kringle containing transmembrane protein 2 [Source:HGNC Symbol;Acc:HGNC:18797]	CUB	104	111	1127	908	1.12107	1.3315	21.7958	13.2641
ENSG00000203499	14.5152	4.27058	409.124	227.478	-5.06843	9.98612e-13	2.55143e-11	IQANK1	8	143734140	143790644	+	4982	protein_coding	IQ motif and ankyrin repeat containing 1 [Source:HGNC Symbol;Acc:HGNC:49576]	-	19	5	294	218	0.107462	0.0314694	2.9833	1.6709
ENSG00000198521	0	0	256.051	423.652	-11.1604	1.02303e-12	2.60536e-11	ZNF43	19	21804949	21852125	-	8649	protein_coding	zinc finger protein 43 [Source:HGNC Symbol;Acc:HGNC:13109]	KRAB	0	0	184	406	0	0	1.07549	1.7925
ENSG00000196557	834.241	730.27	22912.3	7399.3	-4.27601	1.10888e-12	2.81845e-11	CACNA1H	16	1153121	1221772	+	8606	protein_coding	calcium voltage-gated channel subunit alpha1 H [Source:HGNC Symbol;Acc:HGNC:1395]	Ion_trans	1092	855	16465	7091	3.57543	3.11521	96.7195	31.4633
ENSG00000137747	29.7943	10.2494	1003.33	324.522	-5.04446	1.10909e-12	2.81845e-11	TMPRSS13	11	117900643	117929459	-	5367	protein_coding	transmembrane serine protease 13 [Source:HGNC Symbol;Acc:HGNC:29808]	Trypsin	39	12	721	311	0.204757	0.0701088	6.79137	2.21273
ENSG00000108395	1741.82	1748.38	16252.2	36742.9	-3.92451	1.12903e-12	2.86604e-11	TRIM37	17	58982638	59106921	-	5482	protein_coding	tripartite motif containing 37 [Source:HGNC Symbol;Acc:HGNC:7523]	zf-B_box	2280	2047	11679	35212	11.7193	11.7085	107.701	245.273
ENSG00000162949	3.05583	2.56235	173.947	159.652	-5.88722	1.15471e-12	2.92807e-11	CAPN13	2	30722771	30820542	-	5191	protein_coding	calpain 13 [Source:HGNC Symbol;Acc:HGNC:16663]	Peptidase_C2	4	3	125	153	0.0217128	0.0181214	1.21734	1.12548
ENSG00000173267	7.63957	17.9364	1007.5	188.87	-5.55299	1.17983e-12	2.98535e-11	SNCG	10	86958618	86963260	+	1247	protein_coding	synuclein gamma [Source:HGNC Symbol;Acc:HGNC:11141]	-	10	21	724	181	0.225964	0.52805	29.3512	5.54257
ENSG00000011201	0	0	359.027	285.913	-11.0831	1.18616e-12	2.99815e-11	ANOS1	X	8528874	8732186	-	7131	protein_coding	anosmin 1 [Source:HGNC Symbol;Acc:HGNC:6211]	fn3	0	0	258	274	0	0	1.82904	1.46723
ENSG00000092969	16.807	11.1035	219.869	535.304	-4.75549	1.23296e-12	3.10981e-11	TGFB2	1	218346235	218444619	+	5151	protein_coding	transforming growth factor beta 2 [Source:HGNC Symbol;Acc:HGNC:11768]	TGFb_propeptide	22	13	158	513	0.120348	0.0791361	1.55067	3.80299
ENSG00000130600	0	0	384.076	266.087	-11.0945	1.2413e-12	3.12749e-11	H19	11	1995176	2001470	-	2897	processed_transcript	H19, imprinted maternally expressed transcript (non-protein coding) [Source:HGNC Symbol;Acc:HGNC:4713]	-	0	0	276	255	0	0	4.81631	3.36117
ENSG00000130529	220.019	187.906	4927.58	1990.96	-4.08374	1.24569e-12	3.1327e-11	TRPM4	19	49157741	49211836	+	6604	protein_coding	transient receptor potential cation channel subfamily M member 4 [Source:HGNC Symbol;Acc:HGNC:17993]	Ion_trans	288	220	3541	1908	1.22883	1.04457	27.1064	11.0324
ENSG00000196353	1.52791	6.83293	279.707	154.435	-5.72166	1.25156e-12	3.14327e-11	CPNE4	3	131533555	132285410	-	6427	protein_coding	copine 4 [Source:HGNC Symbol;Acc:HGNC:2317]	C2	2	8	201	148	0.00876856	0.0390305	1.58103	0.879331
ENSG00000099250	593.594	603.006	5903.08	7606.95	-3.49707	1.33464e-12	3.33419e-11	NRP1	10	33177492	33336262	-	11522	protein_coding	neuropilin 1 [Source:HGNC Symbol;Acc:HGNC:8004]	CUB	777	706	4242	7290	1.9002	1.92132	18.6121	24.1601
ENSG00000104081	119.177	130.68	1849.41	1312.7	-3.66168	1.34042e-12	3.34511e-11	BMF	15	40087890	40108892	-	5447	protein_coding	Bcl2 modifying factor [Source:HGNC Symbol;Acc:HGNC:24132]	-	156	153	1329	1258	0.807	0.880758	12.3345	8.81906
ENSG00000113739	834.241	805.432	11629.4	7774.95	-3.56485	1.47107e-12	3.65244e-11	STC2	5	173314713	173329503	-	6128	protein_coding	stanniocalcin 2 [Source:HGNC Symbol;Acc:HGNC:11374]	-	1092	943	8357	7451	5.02123	4.8252	68.9422	46.4296
ENSG00000136167	74.8677	73.454	851.646	1057.04	-3.68594	1.47131e-12	3.65244e-11	LCP1	13	46125920	46211871	-	5061	protein_coding	lymphocyte cytosolic protein 1 [Source:HGNC Symbol;Acc:HGNC:6528]	CH	98	86	612	1013	0.545627	0.532825	6.1132	7.64314
ENSG00000166816	22.1547	28.1858	944.882	306.783	-4.63631	1.66569e-12	4.12198e-11	LDHD	16	75111860	75116771	-	2359	protein_coding	lactate dehydrogenase D [Source:HGNC Symbol;Acc:HGNC:19708]	FAD_binding_4	29	33	679	294	0.346399	0.43864	14.5511	4.75903
ENSG00000179277	0	0	495.402	198.261	-11.1872	1.67303e-12	4.13579e-11	MEIS3P1	17	15786618	15787575	+	958	processed_pseudogene	Meis homeobox 3 pseudogene 1 [Source:HGNC Symbol;Acc:HGNC:7002]	Coprinus_mating	0	0	356	190	0	0	18.7862	7.57333
ENSG00000272405	3.05583	3.41647	219.869	131.478	-5.7632	1.68965e-12	4.1725e-11	AL365181.3	1	156641666	156644887	-	3222	antisense	-	-	4	4	158	126	0.0349817	0.0389275	2.47905	1.49329
ENSG00000100906	579.843	464.639	10517.6	4937.74	-3.88707	1.73166e-12	4.27178e-11	NFKBIA	14	35401511	35404749	-	2373	protein_coding	NFKB inhibitor alpha [Source:HGNC Symbol;Acc:HGNC:7797]	Ank	759	544	7558	4732	9.01261	7.18826	161.014	76.1458
ENSG00000187566	0	0	471.745	202.435	-11.1462	1.82328e-12	4.48375e-11	NHLRC1	6	18120440	18122687	-	2248	protein_coding	NHL repeat containing E3 ubiquitin protein ligase 1 [Source:HGNC Symbol;Acc:HGNC:21576]	-	0	0	339	194	0	0	7.62355	3.29537
ENSG00000189190	0.763957	0.854117	182.297	385.043	-8.45916	1.89561e-12	4.65676e-11	ZNF600	19	52764195	52786791	-	4669	protein_coding	zinc finger protein 600 [Source:HGNC Symbol;Acc:HGNC:30951]	zf-C2H2	1	1	131	369	0.00603507	0.00671581	1.41841	3.01788
ENSG00000130940	86.3271	87.1199	1647.63	886.956	-3.86878	1.95669e-12	4.79683e-11	CASZ1	1	10636604	10796650	-	11336	protein_coding	castor zinc finger 1 [Source:HGNC Symbol;Acc:HGNC:26002]	-	113	102	1184	850	0.280883	0.282139	5.28014	2.86324
ENSG00000144115	0	0.854117	979.672	496.696	-10.8329	1.97087e-12	4.82159e-11	THNSL2	2	88170295	88186636	+	6431	protein_coding	threonine synthase like 2 [Source:HGNC Symbol;Acc:HGNC:25602]	-	0	1	704	476	0	0.00487578	5.53411	2.82636
ENSG00000184860	0	3.41647	157.248	228.522	-6.87769	1.98228e-12	4.84447e-11	SDR42E1	16	81988855	82011488	-	11911	protein_coding	short chain dehydrogenase/reductase family 42E, member 1 [Source:HGNC Symbol;Acc:HGNC:29834]	-	0	4	113	219	0	0.0105301	0.479605	0.702093
ENSG00000117472	1.52791	0	321.455	216	-8.39066	2.09364e-12	5.10079e-11	TSPAN1	1	46175073	46185958	+	2366	protein_coding	tetraspanin 1 [Source:HGNC Symbol;Acc:HGNC:20657]	Tetraspannin	2	0	231	207	0.0238189	0	4.93572	3.34083
novel.142	0	0	385.467	232.696	-11.0214	2.09599e-12	5.10126e-11	-	3	83216354	83379969	+	3219	-	-	-	0	0	277	223	0	0	4.35023	2.64535
novel.132	0	0	257.442	341.217	-10.9769	2.13498e-12	5.18546e-11	-	22	40696962	40745494	+	6269	-	-	-	0	0	185	327	0	0	1.49186	1.99181
novel.25	0	0	364.594	242.087	-10.9945	2.16917e-12	5.24346e-11	-	10	29141021	29144044	+	2504	-	-	-	0	0	262	232	0	0	5.28957	3.53796
ENSG00000149809	493.516	427.058	10087.6	4246.96	-3.96065	2.17238e-12	5.24346e-11	TM7SF2	11	65111845	65116384	+	3408	protein_coding	transmembrane 7 superfamily member 2 [Source:HGNC Symbol;Acc:HGNC:11863]	-	646	500	7249	4070	5.34121	4.60037	107.531	45.603
ENSG00000174963	0	1.70823	251.876	260.869	-8.29985	2.17278e-12	5.24346e-11	ZIC4	3	147386046	147406860	-	8568	protein_coding	Zic family member 4 [Source:HGNC Symbol;Acc:HGNC:20393]	zf-C2H2	0	2	181	250	0	0.00731936	1.06795	1.11419
ENSG00000267519	11.4593	6.83293	250.484	217.043	-4.66826	2.17441e-12	5.24346e-11	AC020916.1	19	13834516	13836289	-	1774	lincRNA	-	-	15	8	180	208	0.238256	0.141403	5.12947	4.47722
ENSG00000251664	1.52791	0	630.385	130.435	-8.89581	2.22377e-12	5.35378e-11	PCDHA12	5	140875302	141012344	+	5454	protein_coding	protocadherin alpha 12 [Source:HGNC Symbol;Acc:HGNC:8666]	Cadherin	2	0	453	125	0.0103329	0	4.19891	0.875173
ENSG00000179698	42.0176	35.8729	1269.12	424.696	-4.44123	2.39012e-12	5.73435e-11	WDR97	8	144107726	144118315	+	8967	protein_coding	WD repeat domain 97 [Source:HGNC Symbol;Acc:HGNC:26959]	-	55	42	912	407	0.172831	0.146867	5.14164	1.73319
ENSG00000204839	32.0862	29.04	823.815	360	-4.27395	2.4135e-12	5.78457e-11	MROH6	8	143566187	143572971	-	4408	protein_coding	maestro heat like repeat family member 6 [Source:HGNC Symbol;Acc:HGNC:27814]	-	42	34	592	345	0.268481	0.241858	6.78944	2.98866
ENSG00000269516	0.763957	5.1247	251.876	138.783	-6.08406	2.41861e-12	5.79094e-11	CYP4F23P	19	15564074	15584709	+	1579	transcribed_unprocessed_pseudogene	cytochrome P450 family 4 subfamily F member 23, pseudogene [Source:HGNC Symbol;Acc:HGNC:39944]	p450	1	6	181	133	0.0178453	0.119149	5.79496	3.21639
ENSG00000197070	329.265	375.811	7712.13	3247.3	-3.95821	2.45363e-12	5.86882e-11	ARRDC1	9	137605654	137615360	+	3821	protein_coding	arrestin domain containing 1 [Source:HGNC Symbol;Acc:HGNC:28633]	-	431	440	5542	3112	3.17839	3.61076	73.3235	31.1001
ENSG00000147689	0.763957	2.56235	183.688	159.652	-6.72081	2.47523e-12	5.90852e-11	FAM83A	8	123178960	123210079	+	6317	protein_coding	family with sequence similarity 83 member A [Source:HGNC Symbol;Acc:HGNC:28210]	-	1	3	132	153	0.00446062	0.0148913	1.05637	0.924867
ENSG00000179299	0	0	350.678	242.087	-10.9611	2.48472e-12	5.92518e-11	NSUN7	4	40749897	40809985	+	4728	protein_coding	NOP2/Sun RNA methyltransferase family member 7 [Source:HGNC Symbol;Acc:HGNC:25857]	-	0	0	252	232	0	0	2.69449	1.87374
ENSG00000221821	25.2106	30.7482	804.333	336	-4.34905	2.52099e-12	6.00561e-11	C6orf226	6	42890265	42890816	-	552	protein_coding	chromosome 6 open reading frame 226 [Source:HGNC Symbol;Acc:HGNC:34431]	-	33	36	578	322	1.68454	2.04497	52.9349	22.2749
ENSG00000168907	0	1.70823	359.027	188.87	-8.39274	2.55265e-12	6.0749e-11	PLA2G4F	15	42139034	42156636	-	6103	protein_coding	phospholipase A2 group IVF [Source:HGNC Symbol;Acc:HGNC:27396]	C2	0	2	258	181	0	0.0102756	2.13713	1.13249
ENSG00000125730	4.58374	11.1035	414.69	159.652	-5.20348	2.68362e-12	6.36093e-11	C3	19	6677704	6730562	-	8328	protein_coding	complement C3 [Source:HGNC Symbol;Acc:HGNC:1318]	A2M_comp	6	13	298	153	0.020301	0.0489469	1.80896	0.701535
ENSG00000130518	0.763957	5.97882	425.823	112.696	-6.34734	2.71013e-12	6.40555e-11	IQCN	19	18257097	18274509	-	9154	protein_coding	IQ motif containing N [Source:HGNC Symbol;Acc:HGNC:29350]	-	1	7	306	108	0.00307819	0.0239778	1.68991	0.450517
ENSG00000189057	0	0.854117	356.244	1299.13	-10.9985	2.71058e-12	6.40555e-11	FAM111B	11	59107185	59127410	+	3863	protein_coding	family with sequence similarity 111 member B [Source:HGNC Symbol;Acc:HGNC:24200]	-	0	1	256	1245	0	0.00811704	3.35019	12.3068
ENSG00000116176	9.16748	5.97882	438.347	139.826	-5.24683	2.76142e-12	6.51916e-11	TPSG1	16	1221651	1225257	-	1255	protein_coding	tryptase gamma 1 [Source:HGNC Symbol;Acc:HGNC:14134]	Trypsin	12	7	315	134	0.269429	0.174895	12.6888	4.07718
ENSG00000125999	0	4.27058	357.636	116.87	-6.84274	2.92017e-12	6.87986e-11	BPIFB1	20	33273480	33309878	+	3101	protein_coding	BPI fold containing family B member 1 [Source:HGNC Symbol;Acc:HGNC:16108]	-	0	5	257	112	0	0.0505581	4.18972	1.37916
ENSG00000174307	326.209	312.607	6945.37	2904	-3.94639	2.92295e-12	6.87986e-11	PHLDA3	1	201464383	201469237	-	3138	protein_coding	pleckstrin homology like domain family A member 3 [Source:HGNC Symbol;Acc:HGNC:8934]	-	427	366	4991	2783	3.83426	3.65722	80.406	33.8656
ENSG00000124635	32.8501	49.5388	752.844	515.478	-3.94579	2.96263e-12	6.96632e-11	HIST1H2BJ	6	27125897	27132750	-	950	protein_coding	histone cluster 1 H2B family member j [Source:HGNC Symbol;Acc:HGNC:4761]	Histone	43	58	541	494	1.27541	1.91437	28.7891	19.8565
ENSG00000219438	0	0	434.173	190.956	-11.0371	3.03621e-12	7.12513e-11	FAM19A5	22	48489460	48850912	+	3173	protein_coding	family with sequence similarity 19 member A5, C-C motif chemokine like [Source:HGNC Symbol;Acc:HGNC:21592]	-	0	0	312	183	0	0	4.97094	2.20232
novel.118	0	0	221.261	360	-10.9348	3.20908e-12	7.51587e-11	-	20	53845052	53853600	+	4561	-	-	-	0	0	159	345	0	0	1.76234	2.8884
ENSG00000141232	739.51	723.437	9048.05	6850.43	-3.44189	3.24395e-12	7.59002e-11	TOB1	17	50862223	50867978	-	2521	protein_coding	transducer of ERBB2, 1 [Source:HGNC Symbol;Acc:HGNC:11979]	-	968	847	6502	6565	10.8195	10.535	130.385	99.4399
ENSG00000167434	0	0	389.642	204.522	-10.964	3.35555e-12	7.82785e-11	CA4	17	60149936	60170899	+	2424	protein_coding	carbonic anhydrase 4 [Source:HGNC Symbol;Acc:HGNC:1375]	-	0	0	280	196	0	0	5.83955	3.08761
ENSG00000184564	24.4466	20.4988	257.442	1011.13	-4.81896	3.42188e-12	7.9747e-11	SLITRK6	13	85792787	85806683	-	4474	protein_coding	SLIT and NTRK like family member 6 [Source:HGNC Symbol;Acc:HGNC:23503]	-	32	24	185	969	0.20154	0.168205	2.0904	8.2704
ENSG00000179178	0	0	541.324	149.217	-11.1805	3.52246e-12	8.19293e-11	TMEM125	1	43269994	43274002	+	2127	protein_coding	transmembrane protein 125 [Source:HGNC Symbol;Acc:HGNC:28275]	-	0	0	389	143	0	0	9.24562	2.56725
ENSG00000149256	16.807	9.39528	464.787	209.739	-4.67897	3.80665e-12	8.81919e-11	TENM4	11	78652831	79440948	-	16330	protein_coding	teneurin transmembrane protein 4 [Source:HGNC Symbol;Acc:HGNC:29945]	-	22	11	334	201	0.0379615	0.0211217	1.03398	0.470012
ENSG00000253438	1.52791	0	250.484	240	-8.25933	3.84775e-12	8.89694e-11	PCAT1	8	126556323	127419050	+	16848	antisense	prostate cancer associated transcript 1 (non-protein coding) [Source:HGNC Symbol;Acc:HGNC:43022]	-	2	0	180	230	0.00334494	0	0.540105	0.521289
ENSG00000115884	815.142	800.307	12198.6	7184.35	-3.58472	4.02202e-12	9.29078e-11	SDC1	2	20200797	20225433	-	3595	protein_coding	syndecan 1 [Source:HGNC Symbol;Acc:HGNC:10658]	-	1067	937	8766	6885	8.36319	8.17266	123.27	73.1314
ENSG00000135127	88.619	85.4117	1429.15	873.391	-3.72533	4.05363e-12	9.35465e-11	BICDL1	12	119989869	120094494	+	5484	protein_coding	BICD family like cargo adaptor 1 [Source:HGNC Symbol;Acc:HGNC:28095]	-	116	100	1027	837	0.596028	0.571775	9.46731	5.8281
novel.92	0.763957	0	896.177	437.217	-10.692	4.34337e-12	1.00037e-10	-	18	14994363	15000576	-	6214	-	-	-	1	0	644	419	0.00453456	0	5.23924	2.57479
ENSG00000250986	12.2233	19.6447	642.909	216	-4.7547	4.4335e-12	1.01757e-10	AC141928.1	4	3758748	3763390	-	4525	lincRNA	-	-	16	23	462	207	0.0996341	0.159379	5.16151	1.74683
ENSG00000204740	0	0	268.575	264	-10.8074	4.6412e-12	1.06172e-10	MALRD1	10	19048771	19790401	+	7781	protein_coding	MAM and LDL receptor class A domain containing 1 [Source:HGNC Symbol;Acc:HGNC:24331]	Ldl_recept_a	0	0	193	253	0	0	1.25394	1.24161
ENSG00000067066	3.05583	1.70823	97.4105	293.217	-6.34678	4.66401e-12	1.0659e-10	SP100	2	230415942	230544090	+	12618	protein_coding	SP100 nuclear antigen [Source:HGNC Symbol;Acc:HGNC:11206]	Sp100	4	2	70	281	0.00893256	0.00497006	0.280454	0.850383
ENSG00000260428	36.6699	23.9153	954.623	351.652	-4.42723	4.7304e-12	1.08003e-10	SCX	8	144266560	144268481	+	999	protein_coding	scleraxis bHLH transcription factor [Source:HGNC Symbol;Acc:HGNC:32322]	HLH	48	28	686	337	1.35389	0.878851	34.7146	12.8814
novel.110	0	0	384.076	187.826	-10.9087	4.92272e-12	1.12177e-10	-	2	87342545	87349514	-	3574	-	-	-	0	0	276	180	0	0	3.90399	1.92317
novel.631	0	0.854117	644.301	544.695	-10.5214	5.42184e-12	1.23194e-10	-	CHR_HSCHR6_MHC_MCF_CTG1	31711832	31713504	+	1083	-	-	-	0	1	463	522	0	0.028953	21.6126	18.4052
ENSG00000124140	26.7385	46.1223	837.73	442.435	-4.1369	5.64326e-12	1.28102e-10	SLC12A5	20	46021690	46060152	+	8909	protein_coding	solute carrier family 12 member 5 [Source:HGNC Symbol;Acc:HGNC:13818]	AA_permease	35	54	602	424	0.110699	0.190059	3.41603	1.81734
ENSG00000204052	11.4593	13.6659	457.829	183.652	-4.67425	5.86747e-12	1.32936e-10	LRRC73	6	43506969	43510686	-	2121	protein_coding	leucine rich repeat containing 73 [Source:HGNC Symbol;Acc:HGNC:21375]	-	15	16	329	176	0.199277	0.236539	7.84168	3.16862
ENSG00000242779	0	0	214.303	313.043	-10.7942	5.91607e-12	1.33908e-10	ZNF702P	19	52968251	53037898	-	4769	transcribed_processed_pseudogene	zinc finger protein 702, pseudogene [Source:HGNC Symbol;Acc:HGNC:25775]	-	0	0	154	300	0	0	1.63248	2.40211
ENSG00000003249	809.794	755.039	15457.7	6730.43	-3.82563	6.02835e-12	1.36319e-10	DBNDD1	16	90004865	90020128	-	4791	protein_coding	dysbindin domain containing 1 [Source:HGNC Symbol;Acc:HGNC:28455]	-	1060	884	11108	6450	6.23428	5.7856	117.21	51.4082
novel.145	0	0	278.316	236.869	-10.7591	6.14994e-12	1.38936e-10	-	3	64486767	64493376	-	712	-	-	-	0	0	200	227	0	0	14.2005	12.1743
ENSG00000259881	0.763957	1.70823	265.792	123.13	-7.31887	6.37975e-12	1.43715e-10	AC092384.2	16	88881038	88887136	+	3057	antisense	-	-	1	2	191	118	0.00921745	0.0205143	3.15858	1.47396
ENSG00000188886	0	0	342.328	192	-10.8108	6.70543e-12	1.50907e-10	ASTL	2	96123850	96138436	-	1654	protein_coding	astacin like metalloendopeptidase [Source:HGNC Symbol;Acc:HGNC:31704]	Astacin	0	0	246	184	0	0	7.51888	4.24797
ENSG00000168765	98.5504	111.035	1852.19	989.217	-3.76086	7.0717e-12	1.58999e-10	GSTM4	1	109656081	109674836	+	5745	protein_coding	glutathione S-transferase mu 4 [Source:HGNC Symbol;Acc:HGNC:4636]	GST_N	129	130	1331	948	0.632712	0.709538	11.7123	6.30111
novel.85	0	0	279.707	223.304	-10.7245	7.58136e-12	1.6965e-10	-	17	66959709	66964507	-	1507	-	-	-	0	0	201	214	0	0	6.74274	5.4225
ENSG00000163898	6.11165	5.1247	137.766	234.783	-5.04993	7.68333e-12	1.71769e-10	LIPH	3	185506262	185552613	-	4122	protein_coding	lipase H [Source:HGNC Symbol;Acc:HGNC:18483]	Lipase	8	6	99	225	0.0546875	0.0456421	1.21417	2.08436
ENSG00000131759	760.901	724.291	13220	6314.09	-3.71719	7.86197e-12	1.7543e-10	RARA	17	40309192	40357643	+	4731	protein_coding	retinoic acid receptor alpha [Source:HGNC Symbol;Acc:HGNC:9864]	zf-C4	996	848	9500	6051	5.93216	5.62038	101.514	48.8397
novel.653	0	0	197.604	313.043	-10.748	8.10543e-12	1.80522e-10	-	CHR_HSCHR6_MHC_QBL_CTG1	31625805	31626687	+	507	-	-	-	0	0	142	300	0	0	14.159	22.595
ENSG00000244468	0	0	310.322	199.304	-10.7428	8.1625e-12	1.81621e-10	AC093001.1	3	149284782	149333653	+	551	antisense	-	-	0	0	223	191	0	0	20.4601	13.2367
ENSG00000172830	473.653	462.077	11089.5	3950.61	-4.00647	8.48434e-12	1.88427e-10	SSH3	11	67303448	67312607	+	3641	protein_coding	slingshot protein phosphatase 3 [Source:HGNC Symbol;Acc:HGNC:30581]	DSPc	620	541	7969	3786	4.79819	4.65907	110.646	39.7062
ENSG00000187372	0	0	236.568	254.609	-10.6909	8.51903e-12	1.8902e-10	PCDHB13	5	141213919	141218979	+	5061	protein_coding	protocadherin beta 13 [Source:HGNC Symbol;Acc:HGNC:8684]	Cadherin	0	0	170	244	0	0	1.69811	1.84099
ENSG00000166750	136.748	121.285	1166.14	2547.13	-3.84721	8.65364e-12	1.91827e-10	SLFN5	17	35243036	35273655	+	10709	protein_coding	schlafen family member 5 [Source:HGNC Symbol;Acc:HGNC:28286]	AAA_4	179	142	838	2441	0.470989	0.415778	3.95593	8.70398
ENSG00000235205	0	0	168.381	358.956	-10.7949	9.29835e-12	2.05732e-10	TATDN2P3	13	23243520	23247184	+	3665	processed_pseudogene	TatD DNase domain containing 2 pseudogene 3 [Source:HGNC Symbol;Acc:HGNC:39256]	-	0	0	121	344	0	0	1.66903	3.58413
ENSG00000162004	161.959	145.2	3953.48	1340.87	-4.10699	9.35942e-12	2.06889e-10	CCDC78	16	722582	726954	-	4147	protein_coding	coiled-coil domain containing 78 [Source:HGNC Symbol;Acc:HGNC:14153]	-	212	170	2841	1285	1.44048	1.2854	34.6331	11.8323
ENSG00000231131	0	0	178.122	320.348	-10.7134	1.11232e-11	2.44959e-10	LINC01468	10	52450874	52470533	-	1177	lincRNA	long intergenic non-protein coding RNA 1468 [Source:HGNC Symbol;Acc:HGNC:50913]	-	0	0	128	307	0	0	5.49778	9.96003
ENSG00000275964	39.7257	41.8517	509.318	536.348	-3.68048	1.1886e-11	2.61514e-10	AL355001.2	13	19863858	19865048	+	1191	lincRNA	-	-	52	49	366	514	1.23026	1.29005	15.5354	16.4797
ENSG00000126460	21.3908	12.8117	488.444	234.783	-4.39668	1.22444e-11	2.6915e-10	PRRG2	19	49580646	49591015	+	1701	protein_coding	proline rich and Gla domain 2 [Source:HGNC Symbol;Acc:HGNC:9470]	-	28	15	351	225	0.463831	0.276509	10.4317	5.051
ENSG00000212916	0	0	236.568	228.522	-10.6119	1.2717e-11	2.78759e-10	MAP10	1	232804892	232808407	+	3516	protein_coding	microtubule associated protein 10 [Source:HGNC Symbol;Acc:HGNC:29265]	-	0	0	170	219	0	0	2.4443	2.37845
ENSG00000146904	1.52791	0.854117	172.556	156.522	-7.09207	1.2874e-11	2.81938e-10	EPHA1	7	143390289	143408892	-	4733	protein_coding	EPH receptor A1 [Source:HGNC Symbol;Acc:HGNC:3385]	Pkinase_Tyr	2	1	124	150	0.0119069	0.006625	1.32446	1.21019
ENSG00000187678	1.52791	5.1247	203.171	127.304	-5.65662	1.32155e-11	2.88613e-10	SPRY4	5	142310427	142326455	-	6565	protein_coding	sprouty RTK signaling antagonist 4 [Source:HGNC Symbol;Acc:HGNC:15533]	-	2	6	146	122	0.00858424	0.0286576	1.12427	0.709617
novel.290	9.16748	18.7906	406.341	219.13	-4.48905	1.39253e-11	3.02716e-10	-	CHR_HG708_PATCH	143597804	143611621	+	6382	-	PF13402:Peptidase M60, enhancin and enhancin-like|PF17291:N-terminal domain of M60-like peptidases	-	12	22	292	210	0.0529823	0.108091	2.31302	1.2565
ENSG00000115457	967.933	951.486	22166.5	7771.82	-3.9632	1.44902e-11	3.14706e-10	IGFBP2	2	216632828	216664436	+	4767	protein_coding	insulin like growth factor binding protein 2 [Source:HGNC Symbol;Acc:HGNC:5471]	-	1267	1114	15929	7448	7.48924	7.32761	168.926	59.6614
ENSG00000182704	576.787	503.929	11003.2	4452.52	-3.83794	1.52611e-11	3.30535e-10	TSKU	11	76782251	76798154	+	4131	protein_coding	tsukushi, small leucine rich proteoglycan [Source:HGNC Symbol;Acc:HGNC:28850]	-	755	590	7907	4267	5.14989	4.47836	96.7632	39.4427
ENSG00000180694	767.776	745.644	6356.73	9979.82	-3.43226	1.52975e-11	3.3102e-10	TMEM64	8	90621995	90791632	-	5870	protein_coding	transmembrane protein 64 [Source:HGNC Symbol;Acc:HGNC:25441]	-	1005	873	4568	9564	4.8243	4.66336	39.3407	62.2157
ENSG00000166426	0	0	244.918	209.739	-10.5788	1.54661e-11	3.34294e-10	CRABP1	15	78340324	78348230	+	993	protein_coding	cellular retinoic acid binding protein 1 [Source:HGNC Symbol;Acc:HGNC:2338]	-	0	0	176	201	0	0	8.96019	7.7294
ENSG00000125618	0	0	290.84	178.435	-10.6236	1.56623e-11	3.37984e-10	PAX8	2	113215997	113278950	-	7400	protein_coding	paired box 8 [Source:HGNC Symbol;Acc:HGNC:8622]	PAX	0	0	209	171	0	0	1.4278	0.882395
ENSG00000139192	29.0303	17.9364	758.41	270.261	-4.4489	1.60538e-11	3.46116e-10	TAPBPL	12	6451690	6466517	+	3188	protein_coding	TAP binding protein like [Source:HGNC Symbol;Acc:HGNC:30683]	-	38	21	545	259	0.33587	0.206549	8.64235	3.10227
ENSG00000119684	58.8247	46.1223	545.499	860.869	-3.74384	1.61135e-11	3.47088e-10	MLH3	14	75013764	75051532	-	8363	protein_coding	mutL homolog 3 [Source:HGNC Symbol;Acc:HGNC:7128]	-	77	54	392	825	0.259439	0.202467	2.36961	3.76696
ENSG00000160111	33.6141	23.9153	761.194	316.174	-4.22409	1.64456e-11	3.53918e-10	CPAMD8	19	16892947	17026815	-	10199	protein_coding	C3 and PZP like, alpha-2-macroglobulin domain containing 8 [Source:HGNC Symbol;Acc:HGNC:23228]	A2M_comp	44	28	547	303	0.121563	0.0860841	2.71134	1.13445
ENSG00000170523	1.52791	0	425.823	121.043	-8.418	1.66692e-11	3.58403e-10	KRT83	12	52314301	52321398	-	1875	protein_coding	keratin 83 [Source:HGNC Symbol;Acc:HGNC:6460]	Filament	2	0	306	116	0.0300563	0	8.25038	2.36241
ENSG00000047346	259.745	253.673	2243.23	3293.22	-3.43087	1.67199e-11	3.59165e-10	FAM214A	15	52581317	52709817	-	9832	protein_coding	family with sequence similarity 214 member A [Source:HGNC Symbol;Acc:HGNC:25609]	-	340	297	1612	3156	0.974414	0.94719	8.28852	12.2573
ENSG00000150556	65.7003	56.3717	1024.2	600	-3.73283	1.68009e-11	3.60578e-10	LYPD6B	2	149038107	149215262	+	3771	protein_coding	LY6/PLAUR domain containing 6B [Source:HGNC Symbol;Acc:HGNC:27018]	-	86	66	736	575	0.642611	0.548795	9.86677	5.82251
ENSG00000267131	0	5.1247	155.857	190.956	-6.12892	1.69188e-11	3.62537e-10	AC005746.2	17	61361668	61400243	-	470	antisense	-	-	0	6	112	183	0	0.400291	12.0469	14.868
ENSG00000078018	18.335	20.4988	249.093	429.913	-4.13019	1.70703e-11	3.64701e-10	MAP2	2	209424058	209734118	+	11559	protein_coding	microtubule associated protein 2 [Source:HGNC Symbol;Acc:HGNC:6839]	Tubulin-binding	24	24	179	412	0.0585056	0.0651049	0.782864	1.36106
ENSG00000179715	0.763957	0.854117	297.798	149.217	-8.11179	1.80663e-11	3.85284e-10	PCED1B	12	47079603	47236662	+	2618	protein_coding	PC-esterase domain containing 1B [Source:HGNC Symbol;Acc:HGNC:28255]	-	1	1	214	143	0.0107631	0.0119771	4.13236	2.08576
ENSG00000100558	4.58374	4.27058	218.478	117.913	-5.24407	1.81677e-11	3.87098e-10	PLEK2	14	67386983	67412200	-	1603	protein_coding	pleckstrin 2 [Source:HGNC Symbol;Acc:HGNC:19238]	PH	6	5	157	113	0.105469	0.0978046	4.95131	2.69181
ENSG00000229512	11.4593	5.97882	407.733	141.913	-4.96858	1.86077e-11	3.96115e-10	AC068580.1	11	1763009	1763749	-	252	sense_intronic	-	-	15	7	293	136	1.67725	0.871004	58.7788	20.6081
ENSG00000197046	1.52791	0.854117	160.032	158.609	-7.04594	1.87664e-11	3.99132e-10	SIGLEC15	18	45825512	45844080	+	3598	protein_coding	sialic acid binding Ig like lectin 15 [Source:HGNC Symbol;Acc:HGNC:27596]	V-set	2	1	115	152	0.015663	0.00871488	1.61581	1.61317
ENSG00000131127	1.52791	0.854117	82.1032	361.043	-7.52586	1.89388e-11	4.02436e-10	ZNF141	4	337814	384864	+	5744	protein_coding	zinc finger protein 141 [Source:HGNC Symbol;Acc:HGNC:12926]	KRAB	2	1	59	346	0.0098112	0.00545894	0.519268	2.30017
ENSG00000178372	0	0	413.299	121.043	-10.8102	1.90369e-11	4.04158e-10	CALML5	10	5498697	5499555	-	859	protein_coding	calmodulin like 5 [Source:HGNC Symbol;Acc:HGNC:18180]	-	0	0	297	116	0	0	17.479	5.1566
ENSG00000221923	2.29187	0.854117	116.893	192	-6.59347	1.913e-11	4.05768e-10	ZNF880	19	52369917	52385795	+	3719	protein_coding	zinc finger protein 880 [Source:HGNC Symbol;Acc:HGNC:37249]	KRAB	3	1	84	184	0.0227301	0.00843134	1.14184	1.88925
ENSG00000090238	174.946	136.659	2712.19	1370.09	-3.71096	1.92493e-11	4.07934e-10	YPEL3	16	30092314	30096915	-	3181	protein_coding	yippee like 3 [Source:HGNC Symbol;Acc:HGNC:18327]	-	229	160	1949	1313	2.02852	1.57717	30.9743	15.7616
novel.84	0	0	228.219	210.783	-10.5285	1.96058e-11	4.15115e-10	-	17	66957312	66959643	-	2332	-	-	-	0	0	164	202	0	0	3.55524	3.30767
ENSG00000112902	0.763957	0	645.693	384	-10.319	1.99318e-11	4.21639e-10	SEMA5A	5	9035026	9546075	-	12097	protein_coding	semaphorin 5A [Source:HGNC Symbol;Acc:HGNC:10736]	Sema	1	0	464	368	0.00232932	0	1.93907	1.16163
ENSG00000197647	3.81978	2.56235	101.585	228.522	-5.68686	2.00686e-11	4.24153e-10	ZNF433	19	12014732	12035741	-	3079	protein_coding	zinc finger protein 433 [Source:HGNC Symbol;Acc:HGNC:20811]	-	5	3	73	219	0.045758	0.0305516	1.19858	2.71602
ENSG00000159423	217.728	252.818	4223.44	1970.09	-3.71829	2.07825e-11	4.38457e-10	ALDH4A1	1	18871430	18902781	-	3689	protein_coding	aldehyde dehydrogenase 4 family member A1 [Source:HGNC Symbol;Acc:HGNC:406]	Aldedh	285	296	3035	1888	2.17692	2.51597	41.5914	19.543
ENSG00000146013	3.05583	5.1247	246.309	107.478	-5.44185	2.08304e-11	4.39075e-10	GFRA3	5	138252379	138274671	-	2039	protein_coding	GDNF family receptor alpha 3 [Source:HGNC Symbol;Acc:HGNC:4245]	-	4	6	177	103	0.0552776	0.0922692	4.38844	1.92894
ENSG00000272734	0	0	256.051	185.739	-10.5369	2.09621e-11	4.41063e-10	ADIRF-AS1	10	86965345	86971311	-	5748	processed_transcript	ADIRF antisense RNA 1 [Source:HGNC Symbol;Acc:HGNC:45127]	-	0	0	184	178	0	0	1.61828	1.1825
ENSG00000120327	1.52791	2.56235	125.242	158.609	-6.13142	2.13377e-11	4.48169e-10	PCDHB14	5	141222932	141227759	+	4828	protein_coding	protocadherin beta 14 [Source:HGNC Symbol;Acc:HGNC:8685]	Cadherin	2	3	90	152	0.0116726	0.0194839	0.942386	1.2022
ENSG00000131746	0	0	303.364	157.565	-10.5974	2.166e-11	4.53726e-10	TNS4	17	40475828	40501597	-	4847	protein_coding	tensin 4 [Source:HGNC Symbol;Acc:HGNC:24352]	SH2	0	0	218	151	0	0	2.27372	1.1896
ENSG00000095383	68.7561	76.0164	1875.85	633.391	-4.11507	2.35904e-11	4.92415e-10	TBC1D2	9	98198999	98255721	-	3681	protein_coding	TBC1 domain family member 2 [Source:HGNC Symbol;Acc:HGNC:18026]	TBC	90	89	1348	607	0.688943	0.758135	18.513	6.29683
ENSG00000104783	0	0.854117	800.158	301.565	-10.4097	2.40214e-11	5.00528e-10	KCNN4	19	43766533	43781257	-	3289	protein_coding	potassium calcium-activated channel subfamily N member 4 [Source:HGNC Symbol;Acc:HGNC:6293]	Ion_trans_2	0	1	575	289	0	0.00953364	8.83807	3.35531
ENSG00000180178	0	0	160.032	288	-10.5597	2.41504e-11	5.02771e-10	FAR2P1	2	129990456	130051131	-	8075	transcribed_unprocessed_pseudogene	fatty acyl-CoA reductase 2 pseudogene 1 [Source:HGNC Symbol;Acc:HGNC:49284]	-	0	0	115	276	0	0	0.719961	1.30516
ENSG00000213694	232.243	242.569	2805.42	2083.83	-3.36411	2.48827e-11	5.16195e-10	S1PR3	9	88991447	89005010	+	8754	protein_coding	sphingosine-1-phosphate receptor 3 [Source:HGNC Symbol;Acc:HGNC:3167]	7tm_1	304	284	2016	1997	0.978528	1.01727	11.6423	8.71105
ENSG00000145808	114.593	113.597	1259.38	1124.87	-3.3851	2.59833e-11	5.37139e-10	ADAMTS19	5	129460265	129738683	+	5408	protein_coding	ADAM metallopeptidase with thrombospondin type 1 motif 19 [Source:HGNC Symbol;Acc:HGNC:17111]	TSP_1	150	133	905	1078	0.781558	0.771148	8.45991	7.61169
ENSG00000168539	0	0	286.665	156.522	-10.5408	2.70655e-11	5.59023e-10	CHRM1	11	62908679	62921807	-	3250	protein_coding	cholinergic receptor muscarinic 1 [Source:HGNC Symbol;Acc:HGNC:1950]	7tm_1	0	0	206	150	0	0	3.20433	1.76241
ENSG00000139865	6.87561	6.83293	119.676	314.087	-4.9861	2.72308e-11	5.61946e-10	TTC6	14	37595847	38041442	+	8361	protein_coding	tetratricopeptide repeat domain 6 [Source:HGNC Symbol;Acc:HGNC:19739]	-	9	8	86	301	0.0303313	0.0300023	0.519989	1.3747
ENSG00000007384	486.64	457.806	11415.1	3706.43	-4.00087	2.74844e-11	5.66579e-10	RHBDF1	16	58059	76355	-	4914	protein_coding	rhomboid 5 homolog 1 [Source:HGNC Symbol;Acc:HGNC:20561]	Rhomboid	637	536	8203	3552	3.65267	3.42021	84.3901	27.6018
ENSG00000261437	0	0	210.128	208.696	-10.4608	2.75033e-11	5.66579e-10	AC108860.2	8	94637285	94639467	-	2183	antisense	-	-	0	0	151	200	0	0	3.49685	3.49845
novel.618	0.763957	1.70823	564.981	49.0435	-7.97456	2.77521e-11	5.70707e-10	-	CHR_HSCHR6_MHC_MANN_CTG1	30935547	30945626	+	4085	-	PF07714:Protein tyrosine kinase	Pkinase_Tyr	1	2	406	47	0.00689786	0.0153518	5.02444	0.439344
ENSG00000162894	3.05583	1.70823	249.093	87.6521	-6.1271	3.04617e-11	6.23171e-10	FCMR	1	206904386	206923247	-	2348	protein_coding	Fc fragment of IgM receptor [Source:HGNC Symbol;Acc:HGNC:14315]	V-set	4	2	179	84	0.048003	0.0267088	3.85397	1.36609
ENSG00000116260	1017.59	983.088	14778.6	7910.61	-3.50338	3.17869e-11	6.49718e-10	QSOX1	1	180154834	180204030	+	9311	protein_coding	quiescin sulfhydryl oxidase 1 [Source:HGNC Symbol;Acc:HGNC:9756]	Evr1_Alr	1332	1151	10620	7581	4.03101	3.87616	57.661	31.0906
ENSG00000177426	215.436	226.341	2450.57	1960.7	-3.31976	3.3258e-11	6.78026e-10	TGIF1	18	3411608	3459978	+	8222	protein_coding	TGFB induced factor homeobox 1 [Source:HGNC Symbol;Acc:HGNC:11776]	Coprinus_mating	282	265	1761	1879	0.966447	1.01063	10.8277	8.72666
ENSG00000099860	91.6748	108.473	2048.4	853.565	-3.85778	3.42436e-11	6.96917e-10	GADD45B	19	2476122	2478259	+	2138	protein_coding	growth arrest and DNA damage inducible beta [Source:HGNC Symbol;Acc:HGNC:4096]	-	120	127	1472	818	1.58154	1.8626	34.806	14.6098
ENSG00000142973	0	0	239.352	171.13	-10.4308	3.62709e-11	7.3564e-10	CYP4B1	1	46757838	46819413	+	3466	protein_coding	cytochrome P450 family 4 subfamily B member 1 [Source:HGNC Symbol;Acc:HGNC:2644]	-	0	0	172	164	0	0	2.50873	1.80682
ENSG00000148346	0	0	364.594	113.739	-10.6503	3.68936e-11	7.47625e-10	LCN2	9	128149071	128153455	+	1598	protein_coding	lipocalin 2 [Source:HGNC Symbol;Acc:HGNC:6526]	-	0	0	262	109	0	0	8.28854	2.60464
ENSG00000110092	2201.72	2377.86	25759.5	18620.9	-3.27663	3.78927e-11	7.67213e-10	CCND1	11	69641087	69654474	+	4830	protein_coding	cyclin D1 [Source:HGNC Symbol;Acc:HGNC:1582]	Cyclin_C	2882	2784	18511	17845	16.8133	18.0736	193.748	141.081
novel.276	240.646	245.131	2560.51	2164.17	-3.28179	3.89694e-11	7.87662e-10	-	CHR_HG26_PATCH	38647630	38730535	+	3955	-	PF00307:Calponin homology (CH) domain|PF08726:Ca2+ insensitive EF hand|PF00435:Spectrin repeat	CH	315	287	1840	2074	2.24425	2.2754	23.5193	20.0245
ENSG00000196172	3.81978	3.41647	55.6632	516.522	-6.30541	4.03777e-11	8.13342e-10	ZNF681	19	23739195	23758891	-	6497	protein_coding	zinc finger protein 681 [Source:HGNC Symbol;Acc:HGNC:26457]	KRAB	5	4	40	495	0.0216852	0.019305	0.311244	2.90932
ENSG00000269001	0	0	116.893	341.217	-10.5924	4.15887e-11	8.34887e-10	AC092070.2	19	53197111	53214522	+	4052	transcribed_unprocessed_pseudogene	-	-	0	0	84	327	0	0	1.04801	3.08161
ENSG00000178685	26.7385	21.3529	688.832	250.435	-4.28497	4.43928e-11	8.89665e-10	PARP10	8	143977153	144012772	-	6033	protein_coding	poly(ADP-ribose) polymerase family member 10 [Source:HGNC Symbol;Acc:HGNC:25895]	-	35	25	495	240	0.163471	0.129936	4.14787	1.51907
ENSG00000196440	1.52791	0	247.701	153.391	-7.96897	4.60589e-11	9.2149e-10	ARMCX4	X	101418287	101533459	+	13351	protein_coding	armadillo repeat containing, X-linked 4 [Source:HGNC Symbol;Acc:HGNC:28615]	-	2	0	178	147	0.00422107	0	0.674	0.420438
ENSG00000111907	605.054	538.948	4970.72	5730.78	-3.22563	4.6308e-11	9.2569e-10	TPD52L1	6	125119049	125264407	+	7595	protein_coding	tumor protein D52 like 1 [Source:HGNC Symbol;Acc:HGNC:12006]	-	792	631	3572	5492	2.93835	2.6051	23.7759	27.6122
ENSG00000113389	6.87561	12.8117	190.646	229.565	-4.42421	5.22746e-11	1.0388e-09	NPR3	5	32689070	32791724	+	9866	protein_coding	natriuretic peptide receptor 3 [Source:HGNC Symbol;Acc:HGNC:7945]	ANF_receptor	9	15	137	220	0.0257044	0.047673	0.701994	0.851492
ENSG00000217801	16.0431	18.7906	481.486	201.391	-4.29273	5.54173e-11	1.09756e-09	AL390719.1	1	1059734	1069355	+	2171	transcribed_unprocessed_pseudogene	-	-	21	22	346	193	0.272562	0.31775	8.05694	3.39466
ENSG00000260810	0	4.27058	165.598	138.783	-6.20619	5.71521e-11	1.12908e-09	AL135818.2	14	91258299	91259003	+	705	lincRNA	-	-	0	5	119	133	0	0.222384	8.53319	7.20379
ENSG00000110975	0	0	134.983	266.087	-10.4002	5.974e-11	1.17922e-09	SYT10	12	33374238	33439819	-	5082	protein_coding	synaptotagmin 10 [Source:HGNC Symbol;Acc:HGNC:19266]	C2	0	0	97	255	0	0	0.964919	1.91604
ENSG00000160932	77.1596	77.7246	2806.81	593.739	-4.45608	6.05909e-11	1.19401e-09	LY6E	8	143017982	143023832	+	2640	protein_coding	lymphocyte antigen 6 family member E [Source:HGNC Symbol;Acc:HGNC:6727]	-	101	91	2017	569	1.07801	1.08084	38.6239	8.23014
ENSG00000205744	30.5583	35.8729	378.509	472.696	-3.681	6.0748e-11	1.19611e-09	DENND1C	19	6467207	6482557	-	4657	protein_coding	DENN domain containing 1C [Source:HGNC Symbol;Acc:HGNC:26225]	DENN	40	42	272	453	0.242025	0.282791	2.95268	3.71442
ENSG00000274173	0	0	100.194	353.739	-10.5793	6.12866e-11	1.20571e-09	AL035661.1	20	24931840	24932983	+	1144	lincRNA	-	-	0	0	72	339	0	0	3.18171	11.3155
ENSG00000197670	0.763957	8.54117	143.333	269.217	-5.50011	6.19085e-11	1.21491e-09	AL157838.1	20	53552770	53575863	+	2502	antisense	-	-	1	10	103	258	0.0112621	0.125324	2.08115	3.9376
ENSG00000253313	0	0	210.128	164.87	-10.3006	6.62208e-11	1.2963e-09	C1orf210	1	43281883	43285617	-	1516	protein_coding	chromosome 1 open reading frame 210 [Source:HGNC Symbol;Acc:HGNC:28755]	-	0	0	151	158	0	0	5.03537	3.97976
ENSG00000214456	11.4593	10.2494	339.545	151.304	-4.49563	6.67203e-11	1.305e-09	PLIN5	19	4522531	4535224	-	4815	protein_coding	perilipin 5 [Source:HGNC Symbol;Acc:HGNC:33196]	Perilipin	15	12	244	145	0.0877812	0.0781461	2.56181	1.14993
ENSG00000223573	117.649	109.327	1831.32	934.956	-3.60678	6.84464e-11	1.33544e-09	TINCR	19	5558167	5578349	-	4429	protein_coding	TINCR ubiquitin domain containing [Source:HGNC Symbol;Acc:HGNC:14607]	-	154	128	1316	896	0.979764	0.906206	15.0212	7.72505
ENSG00000233052	0	0	261.617	132.522	-10.3713	6.89039e-11	1.34326e-09	AL513304.1	10	1361001	1361637	-	359	sense_intronic	-	-	0	0	188	127	0	0	26.4739	13.5085
ENSG00000109814	882.37	951.486	7290.48	10064.3	-3.24245	7.0933e-11	1.38167e-09	UGDH	4	39498755	39528311	-	4045	protein_coding	UDP-glucose 6-dehydrogenase [Source:HGNC Symbol;Acc:HGNC:12525]	-	1155	1114	5239	9645	8.04581	8.63554	65.4762	91.0505
ENSG00000178531	250.578	283.567	6923.1	1988.87	-4.06035	7.17035e-11	1.39553e-09	CTXN1	19	7924485	7926166	-	1274	protein_coding	cortexin 1 [Source:HGNC Symbol;Acc:HGNC:31108]	-	328	332	4975	1906	7.25456	8.1713	197.414	57.1284
ENSG00000240204	21.3908	17.0823	286.665	285.913	-3.89356	7.33915e-11	1.4272e-09	SMKR1	7	129502479	129512932	+	1035	protein_coding	small lysine rich protein 1 [Source:HGNC Symbol;Acc:HGNC:43561]	-	28	20	206	274	0.762297	0.605916	10.0619	10.109
ENSG00000177685	43.5455	64.0587	1219.02	483.13	-3.98405	7.76354e-11	1.50601e-09	CRACR2B	11	826144	831991	+	3913	protein_coding	calcium release activated channel regulator 2B [Source:HGNC Symbol;Acc:HGNC:28703]	-	57	75	876	463	0.410461	0.600999	11.3174	4.51825
ENSG00000143333	97.0225	93.0987	1216.24	833.739	-3.43016	7.77681e-11	1.50735e-09	RGS16	1	182598623	182604408	-	2427	protein_coding	regulator of G protein signaling 16 [Source:HGNC Symbol;Acc:HGNC:9997]	RGS	127	109	874	799	1.47449	1.40825	18.2052	12.5712
ENSG00000135709	386.562	375.811	5471.69	2923.83	-3.4609	7.90174e-11	1.52905e-09	KIAA0513	16	85027751	85094230	+	8837	protein_coding	KIAA0513 [Source:HGNC Symbol;Acc:HGNC:29058]	-	506	440	3932	2802	1.61344	1.56124	22.4938	12.1077
ENSG00000170476	3.81978	2.56235	254.659	82.4348	-5.71182	7.90846e-11	1.5291e-09	MZB1	5	139387480	139390081	-	2273	protein_coding	marginal zone B and B1 cell specific protein [Source:HGNC Symbol;Acc:HGNC:30125]	-	5	3	183	79	0.0619836	0.0413851	4.0701	1.32717
ENSG00000160685	495.808	482.576	8782.25	3652.17	-3.66768	8.00779e-11	1.54704e-09	ZBTB7B	1	155002630	155018522	+	4303	protein_coding	zinc finger and BTB domain containing 7B [Source:HGNC Symbol;Acc:HGNC:18668]	BTB	649	565	6311	3500	4.24991	4.11718	74.1448	31.0596
ENSG00000184719	1.52791	0.854117	130.808	153.391	-6.88182	8.10523e-11	1.5633e-09	RNLS	10	88273864	88584530	-	3933	protein_coding	renalase, FAD dependent amine oxidase [Source:HGNC Symbol;Acc:HGNC:25641]	Amino_oxidase	2	1	94	147	0.0143289	0.00797258	1.20825	1.42722
ENSG00000135549	127.581	117.868	964.364	2480.35	-3.81116	8.31867e-11	1.60316e-09	PKIB	6	122471917	122726373	+	3432	protein_coding	cAMP-dependent protein kinase inhibitor beta [Source:HGNC Symbol;Acc:HGNC:9018]	-	167	138	693	2377	1.37112	1.26082	10.208	26.4473
ENSG00000178209	3019.16	2985.14	64348	21687.6	-3.84085	8.41562e-11	1.62052e-09	PLEC	8	143915147	143976734	-	16991	protein_coding	plectin [Source:HGNC Symbol;Acc:HGNC:9069]	CH	3952	3495	46241	20784	6.55397	6.44987	137.582	46.7099
ENSG00000101608	925.151	963.443	7418.51	10208.3	-3.22244	8.64128e-11	1.6604e-09	MYL12A	18	3247481	3256236	+	3245	protein_coding	myosin light chain 12A [Source:HGNC Symbol;Acc:HGNC:16701]	-	1211	1128	5331	9783	10.5156	10.8998	83.0515	115.121
ENSG00000272674	0	0	148.899	214.956	-10.2591	8.84934e-11	1.69712e-09	PCDHB16	5	141181399	141186399	+	5001	protein_coding	protocadherin beta 16 [Source:HGNC Symbol;Acc:HGNC:14546]	Cadherin	0	0	107	206	0	0	1.08163	1.57293
ENSG00000167535	317.042	316.023	5702.69	2371.83	-3.67278	9.06482e-11	1.73703e-09	CACNB3	12	48813794	48828941	+	7153	protein_coding	calcium voltage-gated channel auxiliary subunit beta 3 [Source:HGNC Symbol;Acc:HGNC:1403]	-	415	370	4098	2273	1.63481	1.62194	28.9626	12.1342
ENSG00000171992	49.6572	49.5388	875.303	446.609	-3.73538	9.0758e-11	1.73773e-09	SYNPO	5	150601080	150659220	+	10258	protein_coding	synaptopodin [Source:HGNC Symbol;Acc:HGNC:30672]	-	65	58	629	428	0.178549	0.177291	3.09986	1.59324
ENSG00000277117	16.807	13.6659	345.112	196.174	-4.14732	9.17559e-11	1.75257e-09	FP565260.3	21	5022493	5040666	+	3357	protein_coding	-	-	22	16	248	188	0.184662	0.149448	3.73469	2.13848
ENSG00000167785	0	0	176.731	176.348	-10.2145	9.59876e-11	1.83043e-09	ZNF558	19	8806170	8832328	-	8184	protein_coding	zinc finger protein 558 [Source:HGNC Symbol;Acc:HGNC:26422]	KRAB	0	0	127	169	0	0	0.784498	0.788533
ENSG00000196747	16.0431	6.83293	250.484	214.956	-4.33712	9.89325e-11	1.88355e-09	HIST1H2AI	6	27808199	27808701	+	503	protein_coding	histone cluster 1 H2A family member i [Source:HGNC Symbol;Acc:HGNC:4725]	Histone	21	8	180	206	1.17641	0.498706	18.0908	15.6386
ENSG00000177103	2.29187	0	233.785	98.0869	-7.11727	1.00492e-10	1.91016e-09	DSCAML1	11	117427773	117817525	-	7035	protein_coding	DS cell adhesion molecule like 1 [Source:HGNC Symbol;Acc:HGNC:14656]	I-set	3	0	168	94	0.0120161	0	1.20725	0.510226
ENSG00000223808	0	0	140.549	219.13	-10.2426	1.02251e-10	1.94047e-09	AC044784.1	10	8970125	8973468	+	677	lincRNA	-	-	0	0	101	210	0	0	7.542	11.8448
novel.125	0	0	141.941	213.913	-10.2271	1.07388e-10	2.0298e-09	-	20	53862825	53867130	-	3732	-	-	-	0	0	102	205	0	0	1.3817	2.09754
ENSG00000099377	35.142	31.6023	400.775	410.087	-3.60215	1.08582e-10	2.05072e-09	HSD3B7	16	30985207	30989152	+	2495	protein_coding	hydroxy-delta-5-steroid dehydrogenase, 3 beta- and steroid delta-isomerase 7 [Source:HGNC Symbol;Acc:HGNC:18324]	-	46	37	288	393	0.51951	0.465001	5.83547	6.01479
ENSG00000153246	0	0	160.032	186.783	-10.1892	1.1187e-10	2.11113e-09	PLA2R1	2	159932006	160062610	-	15357	protein_coding	phospholipase A2 receptor 1 [Source:HGNC Symbol;Acc:HGNC:9042]	Lectin_C	0	0	115	179	0	0	0.378569	0.445088
ENSG00000101850	0.763957	0.854117	237.96	126.261	-7.8161	1.18643e-10	2.22483e-09	GPR143	X	9725346	9786297	-	2486	protein_coding	G protein-coupled receptor 143 [Source:HGNC Symbol;Acc:HGNC:20145]	-	1	1	171	121	0.0113346	0.0126131	3.47735	1.85859
ENSG00000101144	1643.27	1611.72	26941	11736	-3.57071	1.18649e-10	2.22483e-09	BMP7	20	57168748	57266629	-	5418	protein_coding	bone morphogenetic protein 7 [Source:HGNC Symbol;Acc:HGNC:1074]	TGFb_propeptide	2151	1887	19360	11247	11.1869	10.9208	180.643	79.2677
novel.422	78.6875	53.8093	1706.08	546.782	-4.08619	1.18746e-10	2.22488e-09	-	CHR_HSCHR16_5_CTG3_1	75226138	75246008	-	8896	-	PF00018:SH3 domain|PF08824:Serine rich protein interaction domain|PF12026:Crk-Associated Substrate C-terminal domain	SH3_1	103	63	1226	524	0.326249	0.222059	6.96706	2.24924
ENSG00000171903	0	0	198.996	148.174	-10.1891	1.19448e-10	2.23626e-09	CYP4F11	19	15912367	15934867	-	4027	protein_coding	cytochrome P450 family 4 subfamily F member 11 [Source:HGNC Symbol;Acc:HGNC:13265]	p450	0	0	143	142	0	0	1.79518	1.3465
ENSG00000268119	0	0	132.2	222.261	-10.2218	1.21673e-10	2.27611e-09	AC010615.2	19	21444241	21463908	-	5146	processed_transcript	-	-	0	0	95	213	0	0	0.93327	1.58055
ENSG00000187642	1.52791	4.27058	146.116	118.956	-5.53568	1.26634e-10	2.36516e-09	PERM1	1	975204	982093	-	3424	protein_coding	PPARGC1 and ESRR induced regulator, muscle 1 [Source:HGNC Symbol;Acc:HGNC:28208]	-	2	5	105	114	0.016459	0.0457888	1.55028	1.27136
ENSG00000167972	614.221	558.592	11935.6	4205.22	-3.78254	1.28347e-10	2.39338e-09	ABCA3	16	2275881	2340746	-	7804	protein_coding	ATP binding cassette subfamily A member 3 [Source:HGNC Symbol;Acc:HGNC:33]	ABC_tran	804	654	8577	4030	2.90299	2.62774	55.5612	19.7191
ENSG00000243232	0	0	251.876	113.739	-10.2626	1.368e-10	2.54899e-09	PCDHAC2	5	140966235	141012344	+	6318	protein_coding	protocadherin alpha subfamily C, 2 [Source:HGNC Symbol;Acc:HGNC:8677]	Cadherin	0	0	181	109	0	0	1.44828	0.658788
ENSG00000127561	89.3829	69.1834	1571.09	644.869	-3.80359	1.39204e-10	2.59175e-09	SYNGR3	16	1989660	1994275	+	3420	protein_coding	synaptogyrin 3 [Source:HGNC Symbol;Acc:HGNC:11501]	-	117	81	1129	618	0.963976	0.742645	16.6887	6.90019
ENSG00000197361	9.93143	9.39528	207.345	168	-4.27801	1.52305e-10	2.82674e-09	FBXL22	15	63597353	63602428	+	3614	protein_coding	F-box and leucine rich repeat protein 22 [Source:HGNC Symbol;Acc:HGNC:27537]	-	13	11	149	161	0.101359	0.0954393	2.08426	1.70113
ENSG00000275713	16.0431	15.3741	226.827	256.696	-3.94393	1.56059e-10	2.89414e-09	HIST1H2BH	6	26251651	26253710	+	2060	protein_coding	histone cluster 1 H2B family member h [Source:HGNC Symbol;Acc:HGNC:4755]	Histone	21	18	163	246	0.287249	0.273986	4.00013	4.56002
ENSG00000196576	2101.64	2113.94	51546.9	14381.2	-3.96707	1.65132e-10	3.05759e-09	PLXNB2	22	50274979	50307627	-	7257	protein_coding	plexin B2 [Source:HGNC Symbol;Acc:HGNC:9104]	Sema	2751	2475	37042	13782	10.6817	10.694	258.042	72.5194
ENSG00000082482	0	0	121.067	221.217	-10.1716	1.69752e-10	3.13813e-09	KCNK2	1	215005775	215237093	+	3910	protein_coding	potassium two pore domain channel subfamily K member 2 [Source:HGNC Symbol;Acc:HGNC:6277]	-	0	0	87	212	0	0	1.12485	2.07042
ENSG00000254251	0	0	104.368	255.652	-10.245	1.71666e-10	3.16864e-09	AC103770.1	8	90806474	90859240	-	833	antisense	-	-	0	0	75	245	0	0	4.55166	11.231
ENSG00000198598	74.1038	93.0987	2053.97	638.609	-4.00925	1.76172e-10	3.24927e-09	MMP17	12	131828393	131851783	+	4003	protein_coding	matrix metallopeptidase 17 [Source:HGNC Symbol;Acc:HGNC:7163]	PG_binding_1	97	109	1476	612	0.682799	0.853814	18.6404	5.83801
ENSG00000168874	45.0734	33.3105	755.627	360	-3.82881	1.79914e-10	3.31569e-09	ATOH8	2	85751344	85788066	+	6076	protein_coding	atonal bHLH transcription factor 8 [Source:HGNC Symbol;Acc:HGNC:24126]	-	59	39	543	345	0.273615	0.201266	4.51789	2.1682
ENSG00000166689	221.547	191.322	2705.23	1586.09	-3.37726	1.81729e-10	3.34653e-09	PLEKHA7	11	16777317	17014443	-	10987	protein_coding	pleckstrin homology domain containing A7 [Source:HGNC Symbol;Acc:HGNC:27049]	PH	290	224	1944	1520	0.743747	0.639281	8.9448	5.28279
ENSG00000116774	29.0303	36.727	772.326	293.217	-4.01826	2.09344e-10	3.84607e-09	OLFML3	1	113979391	114035572	+	2821	protein_coding	olfactomedin like 3 [Source:HGNC Symbol;Acc:HGNC:24956]	-	38	43	555	281	0.379566	0.477956	9.94589	3.80366
ENSG00000231528	0	0	226.827	111.652	-10.1514	2.11235e-10	3.87477e-09	FAM225A	9	113113073	113119928	+	6100	lincRNA	family with sequence similarity 225 member A (non-protein coding) [Source:HGNC Symbol;Acc:HGNC:27855]	-	0	0	163	107	0	0	1.35086	0.669812
ENSG00000095066	407.953	419.371	6231.49	2961.39	-3.47387	2.12602e-10	3.8938e-09	HOOK2	19	12763003	12872740	-	5950	protein_coding	hook microtubule tethering protein 2 [Source:HGNC Symbol;Acc:HGNC:19885]	-	534	491	4478	2838	2.52889	2.58754	38.047	18.2135
ENSG00000051523	1826.62	1821.83	44525	12215	-3.95898	2.15551e-10	3.94475e-09	CYBA	16	88643283	88651152	-	3357	protein_coding	cytochrome b-245 alpha chain [Source:HGNC Symbol;Acc:HGNC:2577]	-	2391	2133	31996	11706	20.0694	19.9233	481.835	133.155
ENSG00000204963	0	0	292.232	84.5217	-10.3054	2.18308e-10	3.9921e-09	PCDHA7	5	140834248	141012344	+	5788	protein_coding	protocadherin alpha 7 [Source:HGNC Symbol;Acc:HGNC:8673]	Cadherin	0	0	210	81	0	0	1.83419	0.534386
ENSG00000124391	2.29187	5.97882	226.827	94.9565	-5.29586	2.19209e-10	4.00549e-09	IL17C	16	88638591	88640473	+	1379	protein_coding	interleukin 17C [Source:HGNC Symbol;Acc:HGNC:5983]	-	3	7	163	91	0.0613004	0.159168	5.97554	2.51986
ENSG00000140945	0	0	148.899	165.913	-10.0494	2.23081e-10	4.07065e-09	CDH13	16	82626803	83800640	+	11187	protein_coding	cadherin 13 [Source:HGNC Symbol;Acc:HGNC:1753]	Cadherin	0	0	107	159	0	0	0.48353	0.542728
ENSG00000185737	0	0	200.387	124.174	-10.0913	2.2312e-10	4.07065e-09	NRG3	10	81875314	82987179	+	5072	protein_coding	neuregulin 3 [Source:HGNC Symbol;Acc:HGNC:7999]	-	0	0	144	119	0	0	1.43528	0.895914
ENSG00000118680	2052.75	2082.34	15916.9	19163.5	-3.08469	2.23815e-10	4.08018e-09	MYL12B	18	3261909	3278284	+	1761	protein_coding	myosin light chain 12B [Source:HGNC Symbol;Acc:HGNC:29827]	-	2687	2438	11438	18365	42.9947	43.4107	328.356	398.227
ENSG00000164850	127.581	87.1199	3011.38	790.956	-4.14556	2.24778e-10	4.09457e-09	GPER1	7	1082208	1093815	+	3149	protein_coding	G protein-coupled estrogen receptor 1 [Source:HGNC Symbol;Acc:HGNC:4485]	7tm_1	167	102	2164	758	1.49434	1.01566	34.7407	9.19169
ENSG00000261183	0	0	158.64	154.435	-10.0409	2.30093e-10	4.18815e-09	SPINT1-AS1	15	40835808	40844387	-	1239	antisense	SPINT1 antisense RNA 1 [Source:HGNC Symbol;Acc:HGNC:53162]	-	0	0	114	148	0	0	4.65144	4.56131
ENSG00000139352	3.81978	7.68705	160.032	142.956	-4.72973	2.31737e-10	4.21482e-09	ASCL1	12	102957686	102960516	+	2472	protein_coding	achaete-scute family bHLH transcription factor 1 [Source:HGNC Symbol;Acc:HGNC:738]	HLH	5	9	115	137	0.0569938	0.114161	2.35181	2.11627
ENSG00000203635	0	0	198.996	123.13	-10.0804	2.35787e-10	4.28519e-09	AC144450.1	2	1620510	1625419	-	1641	lincRNA	-	-	0	0	143	118	0	0	4.40536	2.74582
ENSG00000115616	87.855	89.6822	747.278	1050.78	-3.34067	2.39202e-10	4.34391e-09	SLC9A2	2	102619707	102711318	+	5984	protein_coding	solute carrier family 9 member A2 [Source:HGNC Symbol;Acc:HGNC:11072]	Na_H_Exchanger	115	105	537	1007	0.541518	0.5502	4.53666	6.42594
ENSG00000135374	0	0	140.549	171.13	-10.0353	2.46295e-10	4.46928e-09	ELF5	11	34478793	34513805	-	4494	protein_coding	E74 like ETS transcription factor 5 [Source:HGNC Symbol;Acc:HGNC:3320]	Ets	0	0	101	164	0	0	1.13617	1.39351
ENSG00000130222	0.763957	0	571.939	208.696	-9.91945	2.4874e-10	4.50326e-09	GADD45G	9	89605013	89606555	+	1322	protein_coding	growth arrest and DNA damage inducible gamma [Source:HGNC Symbol;Acc:HGNC:4097]	-	1	0	411	200	0.0213145	0	15.7168	5.77693
ENSG00000103335	3929.79	3820.46	91571.5	25573.6	-3.91789	2.67563e-10	4.83293e-09	PIEZO1	16	88715338	88785220	-	11292	protein_coding	piezo type mechanosensitive ion channel component 1 [Source:HGNC Symbol;Acc:HGNC:28993]	-	5144	4473	65804	24508	12.8362	12.4208	294.602	82.8773
ENSG00000130487	0	0	205.954	113.739	-10.0692	2.7752e-10	5.00893e-09	KLHDC7B	22	50548033	50551022	+	2990	protein_coding	kelch domain containing 7B [Source:HGNC Symbol;Acc:HGNC:25145]	Kelch_1	0	0	148	109	0	0	2.50233	1.39205
ENSG00000184635	0.763957	0	235.177	476.869	-9.78918	2.94384e-10	5.30115e-09	ZNF93	19	19900913	19963464	+	5579	protein_coding	zinc finger protein 93 [Source:HGNC Symbol;Acc:HGNC:13169]	-	1	0	169	457	0.00505068	0	1.53138	3.12794
ENSG00000204434	0	0	203.171	112.696	-10.0518	3.01503e-10	5.42522e-09	POTEKP	2	131591752	131627266	+	2688	unprocessed_pseudogene	POTE ankyrin domain family member K, pseudogene [Source:HGNC Symbol;Acc:HGNC:30182]	Actin	0	0	146	108	0	0	2.74585	1.53424
ENSG00000158089	39.7257	35.8729	697.181	331.826	-3.7652	3.0487e-10	5.47744e-09	GALNT14	2	30910467	31155202	-	4567	protein_coding	polypeptide N-acetylgalactosaminyltransferase 14 [Source:HGNC Symbol;Acc:HGNC:22946]	Glycos_transf_2	52	42	501	318	0.320833	0.288364	5.54575	2.65886
ENSG00000231240	0	0	189.255	120	-10.0216	3.08975e-10	5.54697e-09	KLF2P1	2	130036958	130038422	+	1042	processed_pseudogene	Kruppel like factor 2 pseudogene 1 [Source:HGNC Symbol;Acc:HGNC:49280]	-	0	0	136	115	0	0	6.59819	4.21433
ENSG00000159208	28.2664	25.6235	414.69	281.739	-3.69032	3.10555e-10	5.5711e-09	CIART	1	150282543	150287093	+	2696	protein_coding	circadian associated repressor of transcription [Source:HGNC Symbol;Acc:HGNC:25200]	-	37	30	298	270	0.386713	0.348918	5.58792	3.82422
ENSG00000167741	0	0	250.484	89.7391	-10.1582	3.14776e-10	5.64254e-09	GGT6	17	4556927	4560818	-	3161	protein_coding	gamma-glutamyltransferase 6 [Source:HGNC Symbol;Acc:HGNC:26891]	-	0	0	180	86	0	0	2.87874	1.0389
ENSG00000068097	1093.99	1105.23	9618.59	8597.21	-3.05012	3.15184e-10	5.64558e-09	HEATR6	17	60043194	60078931	-	4868	protein_coding	HEAT repeat containing 6 [Source:HGNC Symbol;Acc:HGNC:24076]	-	1432	1294	6912	8239	8.28894	8.33501	71.7806	64.6283
ENSG00000175928	0	0	112.718	199.304	-10.0381	3.17548e-10	5.6836e-09	LRRN1	3	3799437	3847703	+	4264	protein_coding	leucine rich repeat neuronal 1 [Source:HGNC Symbol;Acc:HGNC:20980]	I-set	0	0	81	191	0	0	0.960332	1.71047
ENSG00000161642	313.986	343.355	3907.55	2392.69	-3.26061	3.35116e-10	5.97539e-09	ZNF385A	12	54369133	54391298	-	3179	protein_coding	zinc finger protein 385A [Source:HGNC Symbol;Acc:HGNC:17521]	-	411	402	2808	2293	3.64299	3.96514	44.654	27.5431
ENSG00000259527	0	0.854117	239.352	447.652	-9.73082	3.36515e-10	5.99581e-09	LINC00052	15	87576929	87579866	+	1966	lincRNA	long intergenic non-protein coding RNA 52 [Source:HGNC Symbol;Acc:HGNC:26455]	-	0	1	172	429	0	0.0159492	4.42281	8.33245
ENSG00000140519	0	0	251.876	86.6087	-10.1508	3.46784e-10	6.16482e-09	RHCG	15	89471398	89496613	-	2607	protein_coding	Rh family C glycoprotein [Source:HGNC Symbol;Acc:HGNC:18140]	Ammonium_transp	0	0	181	83	0	0	3.50987	1.21573
ENSG00000204054	400.313	355.312	4582.47	2724.52	-3.27332	3.51889e-10	6.24616e-09	LINC00963	9	129483451	129513686	+	13171	processed_transcript	long intergenic non-protein coding RNA 963 [Source:HGNC Symbol;Acc:HGNC:48716]	-	524	416	3293	2611	1.12103	0.990369	12.6394	7.56984
ENSG00000230487	85.5631	101.64	1714.43	699.13	-3.6883	3.57062e-10	6.33322e-09	PSMG3-AS1	7	1570073	1589626	+	6355	lincRNA	PSMG3 antisense RNA 1 (head to head) [Source:HGNC Symbol;Acc:HGNC:22230]	-	112	119	1232	670	0.496602	0.587157	9.80051	4.02585
novel.5	0	0.854117	200.387	528	-9.81503	3.59247e-10	6.36719e-09	-	1	106581394	106750816	+	728	-	-	-	0	1	144	506	0	0.0430716	9.99965	26.541
ENSG00000065054	483.584	512.47	9554.58	3341.22	-3.69444	3.7544e-10	6.64791e-09	SLC9A3R2	16	2025356	2039026	+	3550	protein_coding	SLC9A3 regulator 2 [Source:HGNC Symbol;Acc:HGNC:11076]	PDZ	633	600	6866	3202	5.02437	5.29963	97.7753	34.4423
ENSG00000162552	6.11165	1.70823	246.309	87.6521	-5.39344	3.75896e-10	6.64791e-09	WNT4	1	22117305	22143969	-	4527	protein_coding	Wnt family member 4 [Source:HGNC Symbol;Acc:HGNC:12783]	wnt	8	2	177	84	0.049795	0.0138529	1.97659	0.708545
ENSG00000134463	0.763957	0	466.179	224.348	-9.74233	3.7593e-10	6.64791e-09	ECHDC3	10	11742366	11764070	+	2185	protein_coding	enoyl-CoA hydratase domain containing 3 [Source:HGNC Symbol;Acc:HGNC:23489]	ECH	1	0	335	215	0.012896	0	7.75081	3.75739
ENSG00000072310	1825.86	1699.69	32710.5	11677.6	-3.65421	3.86008e-10	6.81082e-09	SREBF1	17	17810399	17837002	-	8030	protein_coding	sterol regulatory element binding transcription factor 1 [Source:HGNC Symbol;Acc:HGNC:11289]	HLH	2390	1990	23506	11191	8.38665	7.7707	147.985	53.2172
ENSG00000167702	465.25	535.531	7344.75	3463.3	-3.43286	3.95371e-10	6.96561e-09	KIFC2	8	144466043	144474202	+	4447	protein_coding	kinesin family member C2 [Source:HGNC Symbol;Acc:HGNC:29530]	Kinesin	609	627	5278	3319	3.85884	4.42103	60.0007	28.4996
ENSG00000165568	0.763957	0	453.655	226.435	-9.72036	3.96358e-10	6.97779e-09	AKR1E2	10	4786629	4848062	+	2417	protein_coding	aldo-keto reductase family 1 member E2 [Source:HGNC Symbol;Acc:HGNC:23437]	Aldo_ket_red	1	0	326	217	0.0116582	0	6.81859	3.42832
ENSG00000211448	25.2106	21.3529	232.394	445.565	-3.86415	4.10471e-10	7.21548e-09	DIO2	14	80197527	80387757	-	7494	protein_coding	iodothyronine deiodinase 2 [Source:HGNC Symbol;Acc:HGNC:2884]	-	33	25	167	427	0.124081	0.104604	1.12657	2.17577
ENSG00000168016	0.763957	0.854117	179.514	126.261	-7.5644	4.20553e-10	7.38186e-09	TRANK1	3	36826820	36945098	-	12174	protein_coding	tetratricopeptide repeat and ankyrin repeat containing 1 [Source:HGNC Symbol;Acc:HGNC:29011]	-	1	1	129	121	0.00231458	0.00257566	0.535686	0.379534
ENSG00000232386	1.52791	0.854117	107.152	142.956	-6.69834	4.20561e-10	7.38186e-09	AC015712.1	15	100849561	100861756	+	1479	lincRNA	-	-	2	1	77	137	0.0381038	0.0212009	2.63194	3.53713
ENSG00000010704	0	5.97882	146.116	151.304	-5.67925	4.32332e-10	7.58283e-09	HFE	6	26087281	26098343	+	5675	protein_coding	hemochromatosis [Source:HGNC Symbol;Acc:HGNC:4886]	MHC_I	0	7	105	145	0	0.0386772	0.935356	0.975666
ENSG00000198246	150.499	156.303	2216.79	1108.17	-3.43766	4.34835e-10	7.62107e-09	SLC29A3	10	71319258	71381423	+	5439	protein_coding	solute carrier family 29 member 3 [Source:HGNC Symbol;Acc:HGNC:23096]	-	197	183	1593	1062	1.0206	1.05501	14.8064	7.45597
ENSG00000197903	543.937	593.611	7641.16	3916.17	-3.34474	4.42506e-10	7.73827e-09	HIST1H2BK	6	27146418	27146798	-	381	protein_coding	histone cluster 1 H2B family member k [Source:HGNC Symbol;Acc:HGNC:13954]	Histone	712	695	5491	3753	52.6576	57.1982	728.585	376.142
ENSG00000186350	1356.02	1278.61	18107.2	8867.48	-3.35588	4.78721e-10	8.34071e-09	RXRA	9	134317098	134440585	+	10814	protein_coding	retinoid X receptor alpha [Source:HGNC Symbol;Acc:HGNC:10477]	Hormone_recep	1775	1497	13012	8498	4.62507	4.34068	60.8291	30.0075
ENSG00000064547	193.281	178.51	4959.59	1205.22	-4.05118	4.82588e-10	8.39739e-09	LPAR2	19	19623668	19628930	-	2980	protein_coding	lysophosphatidic acid receptor 2 [Source:HGNC Symbol;Acc:HGNC:3168]	7tm_1	253	209	3564	1155	2.39227	2.19914	60.461	14.8001
ENSG00000125508	0	2.56235	187.863	91.8261	-6.82755	4.82686e-10	8.39739e-09	SRMS	20	63540810	63547504	-	1516	protein_coding	src-related kinase lacking C-terminal regulatory tyrosine and N-terminal myristylation sites [Source:HGNC Symbol;Acc:HGNC:11298]	Pkinase_Tyr	0	3	135	88	0	0.0620504	4.50182	2.21657
ENSG00000110042	24.4466	28.1858	381.293	277.565	-3.64613	4.86205e-10	8.45238e-09	DTX4	11	59171430	59208587	+	6072	protein_coding	deltex E3 ubiquitin ligase 4 [Source:HGNC Symbol;Acc:HGNC:29151]	WWE	32	33	274	266	0.148499	0.170414	2.28125	1.67282
ENSG00000139832	78.6875	77.7246	1246.85	591.652	-3.55444	4.9847e-10	8.65285e-09	RAB20	13	110523066	110561733	-	1518	protein_coding	RAB20, member RAS oncogene family [Source:HGNC Symbol;Acc:HGNC:18260]	Ras	103	91	896	567	1.91193	1.87972	29.8394	14.263
ENSG00000150687	585.191	579.091	4429.4	5158.95	-3.04187	4.99152e-10	8.65832e-09	PRSS23	11	86791059	86952910	+	11725	protein_coding	serine protease 23 [Source:HGNC Symbol;Acc:HGNC:14370]	Fz	766	678	3183	4944	1.84087	1.81317	13.7239	16.1014
ENSG00000198483	0.763957	0	425.823	224.348	-9.65545	4.99572e-10	8.65925e-09	ANKRD35	1	145866560	145885866	-	3363	protein_coding	ankyrin repeat domain 35 [Source:HGNC Symbol;Acc:HGNC:26323]	-	1	0	306	215	0.00837876	0	4.5999	2.44124
ENSG00000204956	3.81978	1.70823	100.194	140.87	-5.43062	5.09339e-10	8.80342e-09	PCDHGA1	5	141330571	141512981	+	6252	protein_coding	protocadherin gamma subfamily A, 1 [Source:HGNC Symbol;Acc:HGNC:8696]	Cadherin	5	2	72	135	0.022535	0.0100308	0.582193	0.824544
novel.166	0	0	189.255	104.348	-9.94623	5.09381e-10	8.80342e-09	-	6	170025507	170035298	+	7908	-	-	-	0	0	136	100	0	0	0.869413	0.482872
ENSG00000260604	0	0	114.109	172.174	-9.9135	5.11515e-10	8.83382e-09	AL590004.4	6	3904920	3911979	-	7060	lincRNA	-	-	0	0	82	165	0	0	0.587169	0.892438
novel.587	2.29187	0.854117	250.484	59.4782	-6.59568	5.12056e-10	8.8367e-09	-	CHR_HSCHR6_MHC_COX_CTG1	30881886	30890871	+	3768	-	PF07714:Protein tyrosine kinase	Pkinase_Tyr	3	1	180	57	0.0224345	0.00832169	2.41499	0.577647
ENSG00000255774	0	0	183.688	106.435	-9.92916	5.27928e-10	9.10397e-09	AP000439.2	11	69475567	69481545	-	2412	lincRNA	-	-	0	0	132	102	0	0	2.76663	1.61481
ENSG00000188372	41.2537	33.3105	777.893	308.869	-3.86333	5.36969e-10	9.24637e-09	ZP3	7	76397518	76442071	+	2716	protein_coding	zona pellucida glycoprotein 3 [Source:HGNC Symbol;Acc:HGNC:13189]	Zona_pellucida	54	39	559	296	0.560235	0.450254	10.4048	4.1616
ENSG00000277075	0.763957	0	467.57	200.348	-9.69428	5.42067e-10	9.32734e-09	HIST1H2AE	6	26216975	26217483	+	509	protein_coding	histone cluster 1 H2A family member e [Source:HGNC Symbol;Acc:HGNC:4724]	Histone	1	0	336	192	0.0553591	0	33.3715	14.404
ENSG00000078898	0	0	237.96	80.3478	-10.062	5.43837e-10	9.35099e-09	BPIFB2	20	33007600	33023709	+	1898	protein_coding	BPI fold containing family B member 2 [Source:HGNC Symbol;Acc:HGNC:16177]	-	0	0	171	77	0	0	4.55464	1.54915
ENSG00000187848	38.1978	35.8729	917.05	290.087	-4.02516	5.45581e-10	9.37414e-09	P2RX2	12	132618776	132622386	+	1973	protein_coding	purinergic receptor P2X 2 [Source:HGNC Symbol;Acc:HGNC:15459]	-	50	42	659	278	0.714084	0.66749	16.8854	5.38042
ENSG00000095627	0	0.854117	158.64	568.695	-9.81256	5.80642e-10	9.92599e-09	TDRD1	10	114179270	114232304	+	5256	protein_coding	tudor domain containing 1 [Source:HGNC Symbol;Acc:HGNC:11712]	zf-MYND	0	1	114	545	0	0.00596578	1.09649	3.9595
ENSG00000183742	0.763957	0	190.646	477.913	-9.69882	5.85704e-10	9.99804e-09	MACC1	7	20134655	20217404	-	9898	protein_coding	MACC1, MET transcriptional regulator [Source:HGNC Symbol;Acc:HGNC:30215]	-	1	0	137	458	0.00284681	0	0.699724	1.76692
ENSG00000176887	0	0.854117	328.413	271.304	-9.53339	5.92467e-10	1.00989e-08	SOX11	2	5692667	5701385	+	8719	protein_coding	SRY-box 11 [Source:HGNC Symbol;Acc:HGNC:11191]	HMG_box	0	1	236	260	0	0.0035963	1.36836	1.13869
ENSG00000065717	254.398	275.026	5454.99	1729.04	-3.76215	6.24949e-10	1.06449e-08	TLE2	19	2997638	3047635	-	4038	protein_coding	transducin like enhancer of split 2 [Source:HGNC Symbol;Acc:HGNC:11838]	-	333	322	3920	1657	2.32372	2.50042	49.0765	15.6695
ENSG00000005001	0	0.854117	307.539	283.826	-9.51345	6.30102e-10	1.07225e-08	PRSS22	16	2852727	2858170	-	2387	protein_coding	serine protease 22 [Source:HGNC Symbol;Acc:HGNC:14368]	Trypsin	0	1	221	272	0	0.0131362	4.68051	4.35126
ENSG00000160183	0	0	183.688	101.217	-9.90281	6.30415e-10	1.07225e-08	TMPRSS3	21	42371837	42396846	-	5713	protein_coding	transmembrane serine protease 3 [Source:HGNC Symbol;Acc:HGNC:11877]	Trypsin	0	0	132	97	0	0	1.16806	0.648345
ENSG00000105695	0	0	190.646	97.0434	-9.91664	6.4034e-10	1.08756e-08	MAG	19	35292125	35313804	+	2957	protein_coding	myelin associated glycoprotein [Source:HGNC Symbol;Acc:HGNC:6783]	-	0	0	137	93	0	0	2.34219	1.20097
novel.124	0	0	118.284	155.478	-9.84852	6.47283e-10	1.09857e-08	-	20	48091622	48107191	-	15570	-	-	-	0	0	85	149	0	0	0.275984	0.365423
ENSG00000215218	73.3398	58.934	992.196	520.695	-3.51435	6.56029e-10	1.11261e-08	UBE2QL1	5	6448623	6494909	+	4317	protein_coding	ubiquitin conjugating enzyme E2 Q family like 1 [Source:HGNC Symbol;Acc:HGNC:37269]	UQ_con	96	69	713	499	0.626608	0.501175	8.34951	4.41385
ENSG00000260228	0	0	123.851	147.13	-9.83339	6.67483e-10	1.13041e-08	AC009119.1	16	83789967	83807834	-	1603	antisense	-	-	0	0	89	141	0	0	2.80679	3.3588
ENSG00000135314	11.4593	13.6659	240.743	168	-4.02469	6.82061e-10	1.15427e-08	KHDC1	6	73241314	73310365	-	3350	protein_coding	KH domain containing 1 [Source:HGNC Symbol;Acc:HGNC:21366]	-	15	16	173	161	0.126169	0.149761	2.61069	1.83519
novel.665	0	0	237.96	74.0869	-10.0332	7.03217e-10	1.18582e-08	-	CHR_HSCHR6_MHC_QBL_CTG1	31345199	31347319	-	1175	-	PF00129:Class I Histocompatibility antigen, domains alpha 1 and 2|PF07654:Immunoglobulin C1-set domain	MHC_I	0	0	171	71	0	0	7.35719	2.30738
ENSG00000261115	176.474	210.113	1546.04	1772.87	-3.10217	7.2159e-10	1.21594e-08	TMEM178B	7	141074232	141480380	+	10656	protein_coding	transmembrane protein 178B [Source:HGNC Symbol;Acc:HGNC:44112]	-	231	246	1111	1699	0.610835	0.723875	5.27076	6.08833
ENSG00000170836	890.009	929.279	6525.11	8341.56	-3.03069	7.24321e-10	1.21967e-08	PPM1D	17	60600183	60666280	+	5044	protein_coding	protein phosphatase, Mg2+/Mn2+ dependent 1D [Source:HGNC Symbol;Acc:HGNC:9277]	PP2C	1165	1088	4689	7994	6.50815	6.76358	46.9958	60.5185
ENSG00000134317	97.0225	59.7882	747.278	846.261	-3.34393	7.29836e-10	1.22808e-08	GRHL1	2	9951693	10002277	+	7952	protein_coding	grainyhead like transcription factor 1 [Source:HGNC Symbol;Acc:HGNC:17923]	CP2	127	70	537	811	0.450022	0.276022	3.41391	3.89442
ENSG00000141469	0	0	104.368	169.043	-9.84741	7.49233e-10	1.25893e-08	SLC14A1	18	45687025	45752520	+	7182	protein_coding	solute carrier family 14 member 1 (Kidd blood group) [Source:HGNC Symbol;Acc:HGNC:10918]	-	0	0	75	162	0	0	0.527922	0.861328
novel.732	36.6699	38.4352	462.004	357.913	-3.4482	7.62661e-10	1.28058e-08	-	KI270745.1	19353	26608	+	7207	-	-	-	48	45	332	343	0.187669	0.195786	2.32883	1.81735
ENSG00000012124	0.763957	3.41647	198.996	72	-6.04625	7.70427e-10	1.29086e-08	CD22	19	35319261	35347355	+	6159	protein_coding	CD22 molecule [Source:HGNC Symbol;Acc:HGNC:1643]	-	1	4	143	69	0.00457505	0.0203644	1.17376	0.427797
novel.91	0	0	185.08	93.913	-9.8723	7.97197e-10	1.33382e-08	-	18	14473235	14475897	-	2663	-	-	-	0	0	133	90	0	0	2.52484	1.29054
ENSG00000144455	212.38	196.447	2202.87	1476.52	-3.1696	8.10689e-10	1.35543e-08	SUMF1	3	3700814	4467281	-	6952	protein_coding	sulfatase modifying factor 1 [Source:HGNC Symbol;Acc:HGNC:20376]	DUF323	278	230	1583	1415	1.12679	1.03739	11.5113	7.77223
ENSG00000198482	0	0	91.8442	186.783	-9.87531	8.15316e-10	1.36221e-08	ZNF808	19	52527652	52564464	+	5008	protein_coding	zinc finger protein 808 [Source:HGNC Symbol;Acc:HGNC:33230]	zf-C2H2	0	0	66	179	0	0	0.666244	1.36486
ENSG00000006025	110.774	102.494	1608.67	759.652	-3.47247	8.16561e-10	1.36332e-08	OSBPL7	17	47807372	47821834	-	6572	protein_coding	oxysterol binding protein like 7 [Source:HGNC Symbol;Acc:HGNC:16387]	-	145	120	1156	728	0.621694	0.572541	8.8923	4.22992
ENSG00000187720	155.083	182.781	1806.27	1256.35	-3.18026	8.33996e-10	1.39046e-08	THSD4	15	71096952	71783383	+	15837	protein_coding	thrombospondin type 1 domain containing 4 [Source:HGNC Symbol;Acc:HGNC:25835]	TSP_1	203	214	1298	1204	0.361185	0.423705	4.14339	2.90304
ENSG00000113916	81.7433	69.1834	1007.5	583.304	-3.39678	8.40686e-10	1.40063e-08	BCL6	3	187721377	187745727	-	5938	protein_coding	B cell CLL/lymphoma 6 [Source:HGNC Symbol;Acc:HGNC:1001]	BTB	107	81	724	559	0.50775	0.427728	6.16385	3.59476
novel.81	0	1.70823	150.291	134.609	-7.44933	8.53287e-10	1.42062e-08	-	17	17443332	17446268	-	2937	-	-	-	0	2	108	129	0	0.0213525	1.85897	1.6772
ENSG00000155090	381.978	468.056	3638.98	3320.35	-3.03346	8.57945e-10	1.42737e-08	KLF10	8	102648779	102655902	-	4003	protein_coding	Kruppel like factor 10 [Source:HGNC Symbol;Acc:HGNC:11810]	-	500	548	2615	3182	3.51958	4.29257	33.0248	30.3538
ENSG00000196189	113.83	111.889	1487.6	814.956	-3.35015	8.64918e-10	1.43796e-08	SEMA4A	1	156147366	156177752	+	6822	protein_coding	semaphorin 4A [Source:HGNC Symbol;Acc:HGNC:10729]	Sema	149	131	1069	781	0.615433	0.602119	7.92172	4.37158
ENSG00000254419	6.11165	5.1247	265.792	82.4348	-4.94801	8.87804e-10	1.47289e-08	AL139349.1	20	58710795	58711633	+	577	sense_intronic	-	-	8	6	191	79	0.390679	0.32606	16.7344	5.22817
ENSG00000185338	7.63957	3.41647	171.164	117.913	-4.69439	8.9036e-10	1.4761e-08	SOCS1	16	11254405	11256200	-	1796	protein_coding	suppressor of cytokine signaling 1 [Source:HGNC Symbol;Acc:HGNC:19383]	SH2	10	4	123	113	0.156892	0.0698355	3.4622	2.40254
ENSG00000147813	16.0431	8.54117	180.905	233.739	-4.07029	9.05379e-10	1.49889e-08	NAPRT	8	143574785	143578649	-	3079	protein_coding	nicotinate phosphoribosyltransferase [Source:HGNC Symbol;Acc:HGNC:30450]	-	21	10	130	224	0.192183	0.101839	2.13446	2.77803
ENSG00000187172	0	0	153.074	109.565	-9.78619	9.07907e-10	1.50202e-08	BAGE2	21	10413477	10516431	+	4080	transcribed_unprocessed_pseudogene	BAGE family member 2 [Source:HGNC Symbol;Acc:HGNC:15723]	-	0	0	110	105	0	0	1.36297	0.982716
novel.45	0	0	137.766	116.87	-9.74222	1.04462e-09	1.72096e-08	-	12	116484397	116495560	-	844	-	-	-	0	0	99	112	0	0	5.92989	5.06727
ENSG00000233901	6.87561	5.1247	194.821	102.261	-4.62263	1.17639e-09	1.92728e-08	LINC01503	9	129332300	129359538	+	1594	lincRNA	long intergenic non-protein coding RNA 1503 [Source:HGNC Symbol;Acc:HGNC:51184]	-	9	6	140	98	0.159096	0.118028	4.44011	2.34767
ENSG00000007866	277.316	283.567	3658.46	1852.17	-3.29625	1.19895e-09	1.96288e-08	TEAD3	6	35473597	35497076	-	3046	protein_coding	TEA domain transcription factor 3 [Source:HGNC Symbol;Acc:HGNC:11716]	TEA	363	332	2629	1775	3.35802	3.41768	43.6329	22.2519
ENSG00000203814	32.8501	19.6447	327.021	316.174	-3.61154	1.25195e-09	2.04823e-08	HIST2H2BF	1	149782689	149812373	-	3196	protein_coding	histone cluster 2 H2B family member f [Source:HGNC Symbol;Acc:HGNC:24700]	Histone	43	23	235	303	0.379112	0.225654	3.71719	3.62022
ENSG00000129038	104.662	77.7246	1582.23	643.826	-3.60823	1.25509e-09	2.05195e-08	LOXL1	15	73925989	73952137	+	3637	protein_coding	lysyl oxidase like 1 [Source:HGNC Symbol;Acc:HGNC:6665]	-	137	91	1137	617	1.06141	0.78455	15.8041	6.478
ENSG00000187134	2.29187	0	112.718	123.13	-6.62671	1.26724e-09	2.07038e-08	AKR1C1	10	4963253	4983283	+	8765	protein_coding	aldo-keto reductase family 1 member C1 [Source:HGNC Symbol;Acc:HGNC:384]	Aldo_ket_red	3	0	81	118	0.00964441	0	0.467183	0.514078
ENSG00000074211	285.72	327.981	3737.78	2050.43	-3.23743	1.27728e-09	2.08391e-08	PPP2R2C	4	6320578	6563600	-	9198	protein_coding	protein phosphatase 2 regulatory subunit Bgamma [Source:HGNC Symbol;Acc:HGNC:9306]	-	374	384	2686	1965	1.14574	1.30906	14.7627	8.1577
ENSG00000174871	82.5073	80.287	740.32	710.608	-3.15572	1.28123e-09	2.0889e-08	CNIH2	11	66278190	66285301	+	2069	protein_coding	cornichon family AMPA receptor auxiliary protein 2 [Source:HGNC Symbol;Acc:HGNC:28744]	-	108	94	532	681	1.47085	1.42459	12.9988	12.5686
ENSG00000148344	73.3398	61.4964	907.309	514.435	-3.39717	1.30816e-09	2.12987e-08	PTGES	9	129738331	129753047	-	1896	protein_coding	prostaglandin E synthase [Source:HGNC Symbol;Acc:HGNC:9599]	-	96	72	652	493	1.42672	1.19074	17.3845	9.92904
ENSG00000184709	1.52791	1.70823	134.983	84.5217	-6.0847	1.31327e-09	2.13524e-08	LRRC26	9	137168758	137170051	-	1209	protein_coding	leucine rich repeat containing 26 [Source:HGNC Symbol;Acc:HGNC:31409]	-	2	2	97	81	0.0466133	0.0518712	4.05601	2.55834
ENSG00000143126	1371.3	1256.41	24482	7985.74	-3.62707	1.3214e-09	2.1457e-08	CELSR2	1	109250019	109275750	+	12349	protein_coding	cadherin EGF LAG seven-pass G-type receptor 2 [Source:HGNC Symbol;Acc:HGNC:3231]	7tm_2	1795	1471	17593	7653	4.0958	3.73511	72.0214	23.6646
ENSG00000125534	2542.45	2411.17	41757.1	15156.5	-3.52219	1.32152e-09	2.1457e-08	PPDPF	20	63520724	63522206	+	1094	protein_coding	pancreatic progenitor cell differentiation and proliferation factor [Source:HGNC Symbol;Acc:HGNC:16142]	-	3328	2823	30007	14525	85.7181	80.9126	1386.62	506.988
ENSG00000167766	63.4084	58.0799	446.697	970.434	-3.54463	1.32814e-09	2.15496e-08	ZNF83	19	52594060	52690496	-	8028	protein_coding	zinc finger protein 83 [Source:HGNC Symbol;Acc:HGNC:13158]	-	83	68	321	930	0.291325	0.265598	2.0214	4.42359
ENSG00000112183	29.0303	25.6235	313.105	305.739	-3.50026	1.34066e-09	2.17229e-08	RBM24	6	17281346	17293875	+	3444	protein_coding	RNA binding motif protein 24 [Source:HGNC Symbol;Acc:HGNC:21539]	RRM_1	38	30	225	293	0.310904	0.273137	3.30273	3.24865
ENSG00000183036	0	0	98.8021	151.304	-9.71878	1.34925e-09	2.18471e-08	PCP4	21	39867317	39929397	+	1106	protein_coding	Purkinje cell protein 4 [Source:HGNC Symbol;Acc:HGNC:8742]	-	0	0	71	145	0	0	3.24532	5.00624
ENSG00000273472	57.2967	43.5599	769.543	398.609	-3.53195	1.39229e-09	2.24977e-08	AC096733.2	4	140756528	140757921	+	1394	lincRNA	-	-	75	51	553	382	1.51602	1.14718	20.0547	10.464
ENSG00000167165	0	0	86.2779	169.043	-9.74932	1.44383e-09	2.32827e-08	UGT1A6	2	233691607	233773300	+	5180	protein_coding	UDP glucuronosyltransferase family 1 member A6 [Source:HGNC Symbol;Acc:HGNC:12538]	UDPGT	0	0	62	162	0	0	0.605084	1.19422
ENSG00000233836	0	0	94.6274	154.435	-9.71297	1.45739e-09	2.34853e-08	AC139769.1	19	23762944	23833314	+	3242	transcribed_unprocessed_pseudogene	-	-	0	0	68	148	0	0	1.06035	1.7432
ENSG00000213943	6.87561	2.56235	420.257	53.2174	-5.63375	1.45855e-09	2.3488e-08	KRT18P17	3	12787393	12788671	-	1279	processed_pseudogene	keratin 18 pseudogene 17 [Source:HGNC Symbol;Acc:HGNC:33385]	Filament	9	3	302	51	0.19828	0.0735484	11.9369	1.52264
ENSG00000237807	0	0	115.501	125.217	-9.66219	1.52652e-09	2.45157e-08	AC022034.2	8	53515171	53523931	-	2387	lincRNA	-	-	0	0	83	120	0	0	1.75784	1.91967
ENSG00000150676	0.763957	0.854117	43.1389	370.435	-8.00382	1.52871e-09	2.45342e-08	CCDC83	11	85855101	85920021	+	2359	protein_coding	coiled-coil domain containing 83 [Source:HGNC Symbol;Acc:HGNC:28535]	-	1	1	31	355	0.0119448	0.0132921	0.664336	5.74644
ENSG00000253125	0	0	176.731	80.3478	-9.75387	1.59681e-09	2.55749e-08	AC055854.1	8	22690150	22798616	+	2191	processed_transcript	-	-	0	0	127	77	0	0	2.93032	1.34198
ENSG00000120549	137.512	140.075	1114.65	1178.09	-3.04615	1.64269e-09	2.62742e-08	KIAA1217	10	23694746	24547848	+	10807	protein_coding	KIAA1217 [Source:HGNC Symbol;Acc:HGNC:25428]	-	180	164	801	1129	0.469325	0.47584	3.74698	3.98922
ENSG00000246582	0	0	154.465	90.7826	-9.68657	1.70727e-09	2.72702e-08	AC100861.1	8	23224471	23230926	+	2445	processed_transcript	-	-	0	0	111	87	0	0	2.29508	1.35875
novel.37	0	0	189.255	72	-9.77678	1.78316e-09	2.84246e-08	-	11	71284073	71287858	+	1640	-	-	-	0	0	136	69	0	0	4.19227	1.60659
ENSG00000141579	1.52791	5.1247	121.067	111.652	-5.15113	1.81773e-09	2.89561e-08	ZNF750	17	82829435	82840578	-	3713	protein_coding	zinc finger protein 750 [Source:HGNC Symbol;Acc:HGNC:25843]	-	2	6	87	107	0.0151779	0.0506698	1.18454	1.10042
ENSG00000043143	504.975	429.621	5613.63	3017.74	-3.20696	1.82779e-09	2.90968e-08	JADE2	5	134524312	134583230	+	9877	protein_coding	jade family PHD finger 2 [Source:HGNC Symbol;Acc:HGNC:22984]	-	661	503	4034	2892	1.88574	1.59686	20.6474	11.1808
ENSG00000152217	0.763957	11.9576	193.429	201.391	-4.9795	1.843e-09	2.93191e-08	SETBP1	18	44680173	45068510	+	14014	protein_coding	SET binding protein 1 [Source:HGNC Symbol;Acc:HGNC:15573]	-	1	14	139	193	0.00201069	0.0313248	0.501425	0.525889
ENSG00000006118	2171.16	2195.08	44186.8	12693.9	-3.70345	1.86383e-09	2.96305e-08	TMEM132A	11	60924463	60937159	+	7271	protein_coding	transmembrane protein 132A [Source:HGNC Symbol;Acc:HGNC:31092]	-	2842	2570	31753	12165	11.0138	11.0831	220.772	63.8876
ENSG00000102879	117.649	81.1411	2205.65	649.043	-3.84292	1.87752e-09	2.98281e-08	CORO1A	16	30182827	30189076	+	4871	protein_coding	coronin 1A [Source:HGNC Symbol;Acc:HGNC:2252]	-	154	95	1585	622	0.890859	0.611544	16.45	4.87608
ENSG00000089820	113.83	116.16	2031.71	740.869	-3.59112	1.9502e-09	3.09619e-08	ARHGAP4	X	153907367	153934999	-	5580	protein_coding	Rho GTPase activating protein 4 [Source:HGNC Symbol;Acc:HGNC:674]	-	149	136	1460	710	0.752417	0.764236	13.2273	4.85873
novel.56	1.52791	1.70823	235.177	48	-6.45027	1.95213e-09	3.09718e-08	-	14	105483127	105486019	+	2893	-	-	-	2	2	169	46	0.01948	0.0216772	2.95319	0.607167
ENSG00000135373	1.52791	3.41647	118.284	94.9565	-5.44787	1.95564e-09	3.10066e-08	EHF	11	34621093	34661057	+	4386	protein_coding	ETS homologous factor [Source:HGNC Symbol;Acc:HGNC:3246]	Ets	2	4	85	91	0.012849	0.0285966	0.979725	0.792267
ENSG00000182054	1964.13	1873.93	29295.5	11568	-3.41232	1.9608e-09	3.10675e-08	IDH2	15	90083045	90102504	-	2814	protein_coding	isocitrate dehydrogenase (NADP(+)) 2, mitochondrial [Source:HGNC Symbol;Acc:HGNC:5383]	-	2571	2194	21052	11086	25.7445	24.4475	378.201	150.435
ENSG00000163873	0	4.27058	151.682	93.913	-5.89284	2.00733e-09	3.17621e-08	GRIK3	1	36795527	37034129	-	10111	protein_coding	glutamate ionotropic receptor kainate type subunit 3 [Source:HGNC Symbol;Acc:HGNC:4581]	ANF_receptor	0	5	109	90	0	0.015506	0.544987	0.339897
ENSG00000151025	4.58374	1.70823	66.7958	208.696	-5.43788	2.06885e-09	3.2676e-08	GPR158	10	25175062	25602226	+	7726	protein_coding	G protein-coupled receptor 158 [Source:HGNC Symbol;Acc:HGNC:23689]	7tm_3	6	2	48	200	0.0218828	0.00811704	0.31408	0.988494
ENSG00000080007	0	0	55.6632	221.217	-9.86726	2.09583e-09	3.29856e-08	DDX43	6	73394748	73417569	+	2807	protein_coding	DEAD-box helicase 43 [Source:HGNC Symbol;Acc:HGNC:18677]	DEAD	0	0	40	212	0	0	0.720396	2.88398
ENSG00000121552	0	0.854117	90.4526	597.913	-9.73205	2.1522e-09	3.38501e-08	CSTA	3	122325244	122341972	+	1373	protein_coding	cystatin A [Source:HGNC Symbol;Acc:HGNC:2481]	-	0	1	65	573	0	0.0228377	2.3933	15.9361
ENSG00000197124	0	0	57.0547	214.956	-9.84166	2.1792e-09	3.42292e-08	ZNF682	19	19997058	20039506	-	4968	protein_coding	zinc finger protein 682 [Source:HGNC Symbol;Acc:HGNC:28857]	-	0	0	41	206	0	0	0.417211	1.58338
ENSG00000157110	320.862	324.564	3217.33	2146.43	-3.05478	2.2114e-09	3.47119e-08	RBPMS	8	30384479	30572261	+	8931	protein_coding	RNA binding protein, mRNA processing factor [Source:HGNC Symbol;Acc:HGNC:19097]	RRM_1	420	380	2312	2057	1.32512	1.33415	13.087	8.79494
ENSG00000135905	0	0	73.7537	171.13	-9.6896	2.32317e-09	3.63937e-08	DOCK10	2	224765090	225042445	-	11265	protein_coding	dedicator of cytokinesis 10 [Source:HGNC Symbol;Acc:HGNC:23479]	Ded_cyto	0	0	53	164	0	0	0.237847	0.555919
ENSG00000162755	0	1.70823	197.604	85.5652	-7.43614	2.32941e-09	3.64673e-08	KLHDC9	1	161098361	161100346	+	1720	protein_coding	kelch domain containing 9 [Source:HGNC Symbol;Acc:HGNC:28489]	-	0	2	142	82	0	0.0364606	4.17363	1.82047
ENSG00000185033	432.399	457.806	7909.73	2644.17	-3.56738	2.34356e-09	3.66646e-08	SEMA4B	15	90160604	90229679	+	7006	protein_coding	semaphorin 4B [Source:HGNC Symbol;Acc:HGNC:10730]	-	566	536	5684	2534	2.27642	2.39893	41.0145	13.8113
ENSG00000078114	166.543	164.844	1035.33	2707.83	-3.49802	2.39089e-09	3.73555e-08	NEBL	10	20779973	21174187	-	13654	protein_coding	nebulette [Source:HGNC Symbol;Acc:HGNC:16932]	LIM	218	193	744	2595	0.449887	0.443221	2.75465	7.25732
ENSG00000196366	9.16748	6.83293	233.785	105.391	-4.3994	2.4239e-09	3.78212e-08	C9orf163	9	136483495	136486067	+	2573	lincRNA	chromosome 9 open reading frame 163 [Source:HGNC Symbol;Acc:HGNC:26718]	-	12	8	168	101	0.131416	0.0974929	3.30083	1.49893
novel.437	5.3477	3.41647	178.122	83.4782	-4.88873	2.43207e-09	3.79236e-08	-	CHR_HSCHR17_1_CTG5	45393942	45429922	-	3933	-	PF00620:RhoGAP domain|PF00397:WW domain|PF00169:PH domain	RhoGAP	7	4	128	80	0.0501511	0.0318903	1.64528	0.776721
ENSG00000231991	153.555	155.449	1743.65	1038.26	-3.17005	2.51502e-09	3.91911e-08	ANXA2P2	9	33624274	33625293	+	1020	processed_pseudogene	annexin A2 pseudogene 2 [Source:HGNC Symbol;Acc:HGNC:539]	-	201	182	1253	995	5.55268	5.59492	62.1019	37.2496
ENSG00000254231	7.63957	6.83293	96.0189	228.522	-4.48832	2.64997e-09	4.12037e-08	AC103760.1	8	86333274	86343314	-	1673	processed_transcript	-	-	10	8	69	219	0.168427	0.14994	2.085	4.99858
ENSG00000272068	0.763957	0.854117	146.116	105.391	-7.28242	2.65175e-09	4.12037e-08	AL365181.2	1	156637783	156641004	-	3222	lincRNA	-	-	1	1	105	101	0.00874542	0.00973189	1.64747	1.197
ENSG00000091129	423.996	415.955	2669.05	4552.69	-3.1041	2.65871e-09	4.12409e-08	NRCAM	7	108147623	108456717	-	8193	protein_coding	neuronal cell adhesion molecule [Source:HGNC Symbol;Acc:HGNC:7994]	fn3	555	487	1918	4363	1.90878	1.86384	11.8348	20.3349
ENSG00000111799	37.4339	34.1647	349.286	375.652	-3.33952	2.65879e-09	4.12409e-08	COL12A1	6	75084326	75206051	-	12481	protein_coding	collagen type XII alpha 1 chain [Source:HGNC Symbol;Acc:HGNC:2188]	VWA	49	40	251	360	0.110625	0.100492	1.01667	1.10142
ENSG00000179832	708.952	642.296	11532	3970.43	-3.52001	2.70866e-09	4.19594e-08	MROH1	8	144148016	144261940	+	10903	protein_coding	maestro heat like repeat family member 1 [Source:HGNC Symbol;Acc:HGNC:26958]	-	928	752	8287	3805	2.39833	2.16269	38.4242	13.3262
ENSG00000186777	0	0	61.2295	192	-9.73842	2.71306e-09	4.2e-08	ZNF732	4	270675	305321	-	2193	protein_coding	zinc finger protein 732 [Source:HGNC Symbol;Acc:HGNC:37138]	KRAB	0	0	44	184	0	0	1.0143	3.20389
ENSG00000162782	0.763957	0	187.863	297.391	-9.23591	2.76747e-09	4.27862e-08	TDRD5	1	179591613	179691272	+	4256	protein_coding	tudor domain containing 5 [Source:HGNC Symbol;Acc:HGNC:20614]	-	1	0	135	285	0.00662071	0	1.60356	2.55707
ENSG00000134258	6.87561	6.83293	133.592	136.696	-4.30136	2.77192e-09	4.28269e-08	VTCN1	1	117143587	117210960	-	3027	protein_coding	V-set domain containing T cell activation inhibitor 1 [Source:HGNC Symbol;Acc:HGNC:28873]	-	9	8	96	131	0.0837793	0.0828705	1.60329	1.65256
ENSG00000189120	29.7943	35.0188	425.823	285.913	-3.457	2.80868e-09	4.33665e-08	SP6	17	47844908	47855874	-	4075	protein_coding	Sp6 transcription factor [Source:HGNC Symbol;Acc:HGNC:14530]	-	39	41	306	274	0.269677	0.315485	3.79619	2.56757
ENSG00000163888	55.7688	50.3929	823.815	381.913	-3.50426	2.84746e-09	4.39078e-08	CAMK2N2	3	184259213	184261463	-	1362	protein_coding	calcium/calmodulin dependent protein kinase II inhibitor 2 [Source:HGNC Symbol;Acc:HGNC:24197]	-	73	59	592	366	1.51026	1.35831	21.9735	10.2613
ENSG00000131370	294.123	289.546	5324.18	1717.56	-3.59249	2.88959e-09	4.45284e-08	SH3BP5	3	15254853	15341368	-	4159	protein_coding	SH3 domain binding protein 5 [Source:HGNC Symbol;Acc:HGNC:10827]	-	385	339	3826	1646	2.60842	2.55584	46.5061	15.1126
ENSG00000122679	0	0	197.604	57.3913	-9.74135	3.04356e-09	4.68094e-08	RAMP3	7	45157791	45186302	+	1427	protein_coding	receptor activity modifying protein 3 [Source:HGNC Symbol;Acc:HGNC:9845]	-	0	0	142	55	0	0	5.03058	1.47176
ENSG00000129353	1632.58	1625.38	15113.9	10344	-2.96604	3.04793e-09	4.68461e-08	SLC44A2	19	10602457	10644559	+	5216	protein_coding	solute carrier family 44 member 2 [Source:HGNC Symbol;Acc:HGNC:17292]	-	2137	1903	10861	9913	11.5445	11.4399	105.265	72.5715
ENSG00000247498	1.52791	4.27058	107.152	106.435	-5.22425	3.09159e-09	4.74862e-08	GPRC5D-AS1	12	12927726	12984645	+	3416	antisense	GPRC5D and HEBP1 antisense RNA 1 [Source:HGNC Symbol;Acc:HGNC:53599]	-	2	5	77	102	0.0164975	0.045896	1.13953	1.1402
ENSG00000214796	171.126	164.844	2714.97	1029.91	-3.4781	3.17231e-09	4.86626e-08	AC098934.1	1	202851828	202861620	-	2958	transcribed_unprocessed_pseudogene	-	Tubulin	224	193	1951	987	2.13381	2.04589	33.3436	12.7414
ENSG00000215788	75.6317	62.3505	1091	471.652	-3.50013	3.2087e-09	4.9189e-08	TNFRSF25	1	6461151	6466195	-	3918	protein_coding	TNF receptor superfamily member 25 [Source:HGNC Symbol;Acc:HGNC:11910]	Death	99	73	784	452	0.711995	0.584226	10.1159	4.40527
ENSG00000073282	2.29187	0.854117	112.718	89.7391	-5.98185	3.23155e-09	4.94749e-08	TP63	3	189631416	189897279	+	7454	protein_coding	tumor protein p63 [Source:HGNC Symbol;Acc:HGNC:15979]	P53	3	1	81	86	0.0113407	0.00420662	0.54935	0.440563
ENSG00000249859	101.606	120.43	1018.64	836.869	-3.06311	3.44673e-09	5.2531e-08	PVT1	8	127794533	128101253	+	5493	lincRNA	Pvt1 oncogene (non-protein coding) [Source:HGNC Symbol;Acc:HGNC:9709]	-	133	141	732	802	0.682258	0.804882	6.73682	5.57524
ENSG00000272141	0	0	157.248	72	-9.58839	3.49854e-09	5.32861e-08	AL390719.2	1	1169357	1170343	+	987	lincRNA	-	-	0	0	113	69	0	0	5.78782	2.66951
ENSG00000007516	92.4387	81.9952	1934.29	525.913	-3.81721	3.5338e-09	5.37885e-08	BAIAP3	16	1333601	1349441	+	6146	protein_coding	BAI1 associated protein 3 [Source:HGNC Symbol;Acc:HGNC:948]	C2	121	96	1390	504	0.554752	0.48978	11.4334	3.13139
ENSG00000115461	1148.23	1124.87	8832.35	7743.65	-2.86634	3.5859e-09	5.45113e-08	IGFBP5	2	216672105	216695525	-	6442	protein_coding	insulin like growth factor binding protein 5 [Source:HGNC Symbol;Acc:HGNC:5474]	-	1503	1317	6347	7421	6.57423	6.41044	49.8083	43.9886
ENSG00000106948	71.048	79.4328	1031.16	515.478	-3.36107	3.62873e-09	5.51268e-08	AKNA	9	114334156	114394405	-	10601	protein_coding	AT-hook transcription factor [Source:HGNC Symbol;Acc:HGNC:24108]	-	93	93	741	494	0.247197	0.27508	3.53366	1.77942
ENSG00000111344	45.0734	27.3317	759.802	273.391	-3.83162	3.66451e-09	5.55988e-08	RASAL1	12	113098819	113136239	-	4813	protein_coding	RAS protein activator like 1 [Source:HGNC Symbol;Acc:HGNC:9873]	C2	59	32	546	262	0.345416	0.208476	5.73496	2.07866
ENSG00000186088	1.52791	3.41647	73.7537	142.956	-5.47454	3.72774e-09	5.65219e-08	GSAP	7	77310751	77416400	-	9001	protein_coding	gamma-secretase activating protein [Source:HGNC Symbol;Acc:HGNC:28042]	-	2	4	53	137	0.00626103	0.0139345	0.297673	0.581204
ENSG00000124942	1862.53	1696.28	11376.2	15616.7	-2.92312	3.77307e-09	5.71724e-08	AHNAK	11	62433542	62556235	-	19465	protein_coding	AHNAK nucleoprotein [Source:HGNC Symbol;Acc:HGNC:347]	PDZ	2438	1986	8175	14966	3.52928	3.19924	21.2318	29.3596
ENSG00000106077	573.731	529.552	6490.32	3348.52	-3.15653	3.8204e-09	5.78525e-08	ABHD11	7	73736094	73738867	-	2289	protein_coding	abhydrolase domain containing 11 [Source:HGNC Symbol;Acc:HGNC:16407]	-	751	620	4664	3209	9.24486	8.49314	103.007	53.5331
ENSG00000138771	648.599	616.672	5851.59	4028.87	-2.96503	3.8536e-09	5.83178e-08	SHROOM3	4	76435100	76783253	+	13958	protein_coding	shroom family member 3 [Source:HGNC Symbol;Acc:HGNC:30422]	PDZ	849	722	4205	3861	1.71392	1.62195	15.2299	10.5627
ENSG00000254221	2.29187	4.27058	119.676	93.913	-5.03612	3.87244e-09	5.85646e-08	PCDHGB1	5	141350102	141512979	+	4773	protein_coding	protocadherin gamma subfamily B, 1 [Source:HGNC Symbol;Acc:HGNC:8708]	Cadherin	3	5	86	90	0.0177107	0.0328474	0.910879	0.720029
ENSG00000053108	9.16748	8.54117	215.695	112.696	-4.20962	3.87487e-09	5.85646e-08	FSTL4	5	133196455	133612564	-	6734	protein_coding	follistatin like 4 [Source:HGNC Symbol;Acc:HGNC:21389]	-	12	10	155	108	0.0502128	0.0465639	1.16362	0.61242
ENSG00000161031	0	0	193.429	54.2609	-9.69931	3.88188e-09	5.86331e-08	PGLYRP2	19	15468645	15498956	-	3188	protein_coding	peptidoglycan recognition protein 2 [Source:HGNC Symbol;Acc:HGNC:30013]	-	0	0	139	52	0	0	2.2042	0.622851
ENSG00000198517	291.831	330.543	6341.42	1754.09	-3.70115	3.93905e-09	5.94205e-08	MAFK	7	1530714	1543043	+	4458	protein_coding	MAF bZIP transcription factor K [Source:HGNC Symbol;Acc:HGNC:6782]	bZIP_Maf	382	387	4557	1681	2.41451	2.72203	51.6765	14.3988
ENSG00000182957	134.456	159.72	1039.51	1378.43	-3.03955	3.95818e-09	5.9671e-08	SPATA13	13	23979805	24307074	+	9948	protein_coding	spermatogenesis associated 13 [Source:HGNC Symbol;Acc:HGNC:23222]	RhoGEF	176	187	747	1321	0.498521	0.589425	3.79611	5.07068
ENSG00000232434	103.134	158.866	2255.75	844.174	-3.56476	4.01949e-09	6.05566e-08	AJM1	9	136844415	136848801	+	4387	protein_coding	apical junction component 1 homolog [Source:HGNC Symbol;Acc:HGNC:37284]	-	135	186	1621	809	0.867107	1.32944	18.6797	7.04174
ENSG00000065325	0	0	122.459	89.7391	-9.47846	4.06012e-09	6.11296e-08	GLP2R	17	9822206	9892102	+	6052	protein_coding	glucagon like peptide 2 receptor [Source:HGNC Symbol;Acc:HGNC:4325]	7tm_2	0	0	88	86	0	0	0.735085	0.542623
ENSG00000205593	24.4466	24.7694	397.992	211.826	-3.62977	4.122e-09	6.19823e-08	DENND6B	22	50309030	50327060	-	5935	protein_coding	DENN domain containing 6B [Source:HGNC Symbol;Acc:HGNC:32690]	-	32	29	286	203	0.151927	0.153214	2.43612	1.30609
ENSG00000162645	4.58374	17.0823	192.038	211.826	-4.233	4.15538e-09	6.24189e-08	GBP2	1	89106132	89150456	-	6276	protein_coding	guanylate binding protein 2 [Source:HGNC Symbol;Acc:HGNC:4183]	-	6	20	138	203	0.0269386	0.099924	1.1116	1.23513
ENSG00000249242	200.157	169.969	1320.61	1598.61	-2.9794	4.17643e-09	6.2681e-08	TMEM150C	4	82483170	82562357	-	3671	protein_coding	transmembrane protein 150C [Source:HGNC Symbol;Acc:HGNC:37263]	-	262	199	949	1532	2.01105	1.69977	13.0688	15.9358
ENSG00000164877	316.278	316.023	4390.43	1882.43	-3.31023	4.22868e-09	6.34249e-08	MICALL2	7	1428465	1459502	-	8843	protein_coding	MICAL like 2 [Source:HGNC Symbol;Acc:HGNC:29672]	-	414	370	3155	1804	1.31919	1.31197	18.0365	7.78997
ENSG00000111335	0	0	70.9705	149.217	-9.53618	4.33205e-09	6.48928e-08	OAS2	12	112978395	113011723	+	6264	protein_coding	2'-5'-oligoadenylate synthetase 2 [Source:HGNC Symbol;Acc:HGNC:8087]	NTP_transf_2	0	0	51	143	0	0	0.411597	0.871732
ENSG00000074527	92.4387	87.1199	924.008	641.739	-3.12373	4.36845e-09	6.53966e-08	NTN4	12	95657807	95791152	-	4166	protein_coding	netrin 4 [Source:HGNC Symbol;Acc:HGNC:13658]	NTR	121	102	664	615	0.818413	0.767721	8.05754	5.63709
ENSG00000234614	0	0	108.543	99.1304	-9.44837	4.37562e-09	6.54624e-08	AL450992.2	1	151841877	151850385	+	506	antisense	-	-	0	0	78	95	0	0	7.79288	7.16922
ENSG00000167555	0.763957	0.854117	89.061	155.478	-7.24563	4.40529e-09	6.58645e-08	ZNF528	19	52397849	52418412	+	8530	protein_coding	zinc finger protein 528 [Source:HGNC Symbol;Acc:HGNC:29384]	KRAB	1	1	64	149	0.00330337	0.00367598	0.379302	0.667016
ENSG00000168758	1067.25	1083.87	15008.2	6207.65	-3.30192	4.43037e-09	6.61976e-08	SEMA4C	2	96859716	96870757	-	6157	protein_coding	semaphorin 4C [Source:HGNC Symbol;Acc:HGNC:10731]	Sema	1397	1269	10785	5949	6.39343	6.46272	88.5533	36.8955
ENSG00000153294	2.29187	1.70823	83.4947	111.652	-5.60247	4.45933e-09	6.65881e-08	ADGRF4	6	47685864	47722021	+	3391	protein_coding	adhesion G protein-coupled receptor F4 [Source:HGNC Symbol;Acc:HGNC:19011]	7tm_2	3	2	60	107	0.0249287	0.0184937	0.894493	1.20491
ENSG00000179588	257.453	219.508	3289.69	1447.3	-3.31162	4.55337e-09	6.79494e-08	ZFPM1	16	88453317	88537016	+	6110	protein_coding	zinc finger protein, FOG family member 1 [Source:HGNC Symbol;Acc:HGNC:19762]	-	337	257	2364	1387	1.55416	1.31891	19.5596	8.6683
ENSG00000186891	0.763957	0	404.949	115.826	-9.33523	4.56121e-09	6.80234e-08	TNFRSF18	1	1203508	1206691	-	1370	protein_coding	TNF receptor superfamily member 18 [Source:HGNC Symbol;Acc:HGNC:11914]	-	1	0	291	111	0.0205677	0	10.7381	3.09386
ENSG00000197385	4.58374	5.1247	97.4105	137.739	-4.60187	4.62871e-09	6.89429e-08	ZNF860	3	31981771	31991628	+	3263	protein_coding	zinc finger protein 860 [Source:HGNC Symbol;Acc:HGNC:34513]	KRAB	6	6	70	132	0.0518132	0.0576576	1.08451	1.54474
ENSG00000179082	0	0	111.326	94.9565	-9.43835	4.65766e-09	6.93304e-08	C9orf106	9	129321016	129324905	+	3145	lincRNA	chromosome 9 open reading frame 106 (putative) [Source:HGNC Symbol;Acc:HGNC:31370]	-	0	0	80	91	0	0	1.28595	1.10489
ENSG00000172243	0	0	62.621	162.783	-9.57042	4.68466e-09	6.96884e-08	CLEC7A	12	10116777	10130258	-	4190	protein_coding	C-type lectin domain containing 7A [Source:HGNC Symbol;Acc:HGNC:14558]	Lectin_C	0	0	45	156	0	0	0.54294	1.4217
ENSG00000164430	0.763957	0	102.977	432	-9.37863	4.9266e-09	7.32413e-08	CGAS	6	73413515	73452276	-	4155	protein_coding	cyclic GMP-AMP synthase [Source:HGNC Symbol;Acc:HGNC:21367]	-	1	0	74	414	0.00678165	0	0.900356	3.80477
ENSG00000110090	1065.72	1034.34	9965.1	6438.26	-2.96543	4.93877e-09	7.3376e-08	CPT1A	11	68754620	68844410	-	6565	protein_coding	carnitine palmitoyltransferase 1A [Source:HGNC Symbol;Acc:HGNC:2328]	-	1395	1211	7161	6170	5.98751	5.78405	55.1433	35.888
ENSG00000137648	0	0	154.465	65.7391	-9.53006	5.00883e-09	7.43702e-08	TMPRSS4	11	118077012	118121890	+	9948	protein_coding	transmembrane serine protease 4 [Source:HGNC Symbol;Acc:HGNC:11878]	Trypsin	0	0	111	63	0	0	0.56408	0.241826
ENSG00000172794	4.58374	10.2494	153.074	134.609	-4.28798	5.19703e-09	7.70192e-08	RAB37	17	74670578	74747335	+	5074	protein_coding	RAB37, member RAS oncogene family [Source:HGNC Symbol;Acc:HGNC:30268]	Ras	6	12	110	129	0.0333202	0.0741572	1.09596	0.970819
ENSG00000215440	250.578	226.341	2670.44	1479.65	-3.12097	5.26678e-09	7.80039e-08	NPEPL1	20	58689131	58719238	+	7641	protein_coding	aminopeptidase like 1 [Source:HGNC Symbol;Acc:HGNC:16244]	-	328	265	1919	1418	1.20957	1.08747	12.6963	7.08639
ENSG00000213214	0	0	82.1032	123.13	-9.43362	5.35283e-09	7.9179e-08	ARHGEF35	7	144186083	144195655	-	2431	protein_coding	Rho guanine nucleotide exchange factor 35 [Source:HGNC Symbol;Acc:HGNC:33846]	-	0	0	59	118	0	0	1.22693	1.85351
ENSG00000139410	100.078	64.9129	1678.24	518.609	-3.73352	5.5277e-09	8.17144e-08	SDSL	12	113422237	113438276	+	2216	protein_coding	serine dehydratase like [Source:HGNC Symbol;Acc:HGNC:30404]	PALP	131	76	1206	497	1.66574	1.07539	27.5126	8.56417
ENSG00000070731	12.2233	0.854117	295.015	125.217	-4.98371	5.58926e-09	8.25728e-08	ST6GALNAC2	17	76565379	76586956	-	3098	protein_coding	ST6 N-acetylgalactosaminide alpha-2,6-sialyltransferase 2 [Source:HGNC Symbol;Acc:HGNC:10867]	Glyco_transf_29	16	1	212	120	0.145527	0.0101214	3.45946	1.4791
ENSG00000111110	473.653	439.87	3213.16	3381.91	-2.85185	5.61893e-09	8.29592e-08	PPM1H	12	62643982	62935037	-	7063	protein_coding	protein phosphatase, Mg2+/Mn2+ dependent 1H [Source:HGNC Symbol;Acc:HGNC:18583]	PP2C	620	515	2309	3241	2.47348	2.28634	16.5268	17.5222
ENSG00000167778	397.257	403.997	4832.95	2365.56	-3.16721	5.79751e-09	8.53821e-08	SPRYD3	12	53064316	53079420	-	3479	protein_coding	SPRY domain containing 3 [Source:HGNC Symbol;Acc:HGNC:25920]	SPRY	520	473	3473	2267	4.21168	4.26314	50.4666	24.8826
ENSG00000015133	526.366	514.178	5018.03	3181.56	-2.97809	6.03975e-09	8.8618e-08	CCDC88C	14	91271323	91417844	-	12426	protein_coding	coiled-coil domain containing 88C [Source:HGNC Symbol;Acc:HGNC:19967]	-	689	602	3606	3049	1.56241	1.5191	14.6706	9.36968
ENSG00000265519	0	0	93.2358	104.348	-9.3775	6.22245e-09	9.10726e-08	AC015922.3	17	15787787	15788205	-	347	lincRNA	-	-	0	0	67	100	0	0	9.76111	11.0045
ENSG00000101040	1634.87	1370.86	10640	10696.7	-2.82752	6.23194e-09	9.11546e-08	ZMYND8	20	47209214	47356889	-	7625	protein_coding	zinc finger MYND-type containing 8 [Source:HGNC Symbol;Acc:HGNC:9397]	Bromodomain	2140	1605	7646	10251	7.90825	6.60021	50.693	51.3364
ENSG00000218690	0	0	98.8021	98.0869	-9.37183	6.32734e-09	9.23784e-08	HIST1H2APS4	6	26272021	26272701	-	681	transcribed_unprocessed_pseudogene	histone cluster 1 H2A pseudogene 4 [Source:HGNC Symbol;Acc:HGNC:4732]	Histone	0	0	71	94	0	0	5.27066	5.27084
ENSG00000148180	508.031	493.679	7110.97	2839.3	-3.31212	6.50106e-09	9.4856e-08	GSN	9	121207794	121332843	+	11018	protein_coding	gelsolin [Source:HGNC Symbol;Acc:HGNC:4620]	-	665	578	5110	2721	1.70069	1.64493	23.4462	9.43028
ENSG00000185332	0	0	98.8021	97.0434	-9.36411	6.57159e-09	9.57667e-08	TMEM105	17	81311270	81330674	-	3794	protein_coding	transmembrane protein 105 [Source:HGNC Symbol;Acc:HGNC:26794]	-	0	0	71	93	0	0	0.946051	0.936019
ENSG00000211689	0	0.854117	108.543	379.826	-9.23832	6.58274e-09	9.58222e-08	TRGC1	7	38257879	38265678	-	2730	TR_C_gene	T cell receptor gamma constant 1 [Source:HGNC Symbol;Acc:HGNC:12275]	C1-set	0	1	78	364	0	0.0114858	1.44439	5.0914
ENSG00000134184	0	0	104.368	91.8261	-9.36614	6.58448e-09	9.58222e-08	GSTM1	1	109687814	109709039	+	2512	protein_coding	glutathione S-transferase mu 1 [Source:HGNC Symbol;Acc:HGNC:4632]	GST_N	0	0	75	88	0	0	1.50937	1.33771
ENSG00000130294	508.031	493.679	7550.71	2804.87	-3.36972	6.71306e-09	9.75873e-08	KIF1A	2	240713764	240820308	-	12357	protein_coding	kinesin family member 1A [Source:HGNC Symbol;Acc:HGNC:888]	Kinesin	665	578	5426	2688	1.5164	1.46669	22.1983	8.30644
ENSG00000050327	0	0	100.194	94.9565	-9.3588	6.75611e-09	9.81202e-08	ARHGEF5	7	144355288	144380632	+	5818	protein_coding	Rho guanine nucleotide exchange factor 5 [Source:HGNC Symbol;Acc:HGNC:13209]	RhoGEF	0	0	72	91	0	0	0.625623	0.597264
ENSG00000160789	2048.17	2118.21	34402.6	11294.6	-3.45521	6.75802e-09	9.81202e-08	LMNA	1	156082573	156140089	+	6985	protein_coding	lamin A/C [Source:HGNC Symbol;Acc:HGNC:6636]	Filament	2681	2480	24722	10824	10.8153	11.1329	178.925	59.1725
ENSG00000245571	0	0	84.8863	111.652	-9.37063	6.77523e-09	9.83095e-08	FAM111A-DT	11	59130133	59143015	-	2645	lincRNA	FAM111A divergent transcript [Source:HGNC Symbol;Acc:HGNC:53752]	-	0	0	61	107	0	0	1.16589	1.54475
ENSG00000145675	756.317	775.538	4736.93	6631.3	-2.89173	6.94362e-09	1.00691e-07	PIK3R1	5	68215720	68301821	+	10767	protein_coding	phosphoinositide-3-kinase regulatory subunit 1 [Source:HGNC Symbol;Acc:HGNC:8979]	RhoGAP	990	908	3404	6355	2.59088	2.64432	15.9826	22.5382
ENSG00000182732	1.52791	1.70823	93.2358	91.8261	-5.84056	7.28988e-09	1.0562e-07	RGS6	14	71932439	72566529	+	8937	protein_coding	regulator of G protein signaling 6 [Source:HGNC Symbol;Acc:HGNC:10002]	RGS	2	2	67	88	0.00630586	0.00701715	0.378998	0.376002
ENSG00000106018	16.0431	14.52	329.804	137.739	-3.93214	7.2925e-09	1.0562e-07	VIPR2	7	159028175	159144957	-	5222	protein_coding	vasoactive intestinal peptide receptor 2 [Source:HGNC Symbol;Acc:HGNC:12695]	7tm_2	21	17	237	132	0.113315	0.102079	2.29438	0.965241
ENSG00000204323	9.93143	18.7906	343.72	137.739	-4.0704	7.34108e-09	1.06259e-07	SMIM5	17	75633434	75641404	+	5117	protein_coding	small integral membrane protein 5 [Source:HGNC Symbol;Acc:HGNC:40030]	-	13	22	247	132	0.071587	0.134812	2.44026	0.985048
novel.114	0	0	102.977	89.7391	-9.34028	7.4848e-09	1.0814e-07	-	2	236811773	236816316	-	3425	-	-	-	0	0	74	86	0	0	1.09226	0.958819
ENSG00000255346	6.87561	2.56235	126.634	109.565	-4.62877	7.8244e-09	1.1284e-07	NOX5	15	68930525	69062743	+	12511	protein_coding	NADPH oxidase 5 [Source:HGNC Symbol;Acc:HGNC:14874]	FAD_binding_8	9	3	91	105	0.0202701	0.00751886	0.367708	0.320476
ENSG00000143375	859.451	960.881	8399.57	5476.17	-2.93026	7.98985e-09	1.15085e-07	CGN	1	151510510	151538692	+	6616	protein_coding	cingulin [Source:HGNC Symbol;Acc:HGNC:17429]	Myosin_tail_1	1125	1125	6036	5248	4.79141	5.33187	46.1219	30.2899
ENSG00000240875	6.87561	6.83293	104.368	158.609	-4.26358	8.11857e-09	1.16797e-07	LINC00886	3	156747346	156817062	-	3822	lincRNA	long intergenic non-protein coding RNA 886 [Source:HGNC Symbol;Acc:HGNC:48572]	-	9	8	75	152	0.0663526	0.0656329	0.992029	1.51863
ENSG00000116661	57.2967	46.1223	1166.14	310.956	-3.83462	8.25822e-09	1.18445e-07	FBXO2	1	11637018	11655785	-	3416	protein_coding	F-box protein 2 [Source:HGNC Symbol;Acc:HGNC:13581]	F-box	75	54	838	298	0.618657	0.495677	12.4017	3.33117
novel.698	0	0	51.4884	162.783	-9.49781	8.39869e-09	1.20386e-07	-	CHR_HSCHR7_3_CTG4_4	144180382	144195688	-	8169	-	PF15441:Rho guanine nucleotide exchange factor 5/35	-	0	0	37	156	0	0	0.228974	0.729213
ENSG00000268903	0	0	75.1453	117.913	-9.34564	8.44187e-09	1.20932e-07	AL627309.6	1	135141	135895	-	755	processed_pseudogene	-	-	0	0	54	113	0	0	3.61577	5.71519
ENSG00000171724	0.763957	0	193.429	202.435	-8.94107	8.53909e-09	1.2225e-07	VAT1L	16	77788530	77980107	+	4137	protein_coding	vesicle amine transport 1 like [Source:HGNC Symbol;Acc:HGNC:29315]	ADH_N	1	0	139	194	0.00681116	0	1.69857	1.79067
ENSG00000197013	14.5152	11.9576	102.977	426.782	-4.32355	8.68852e-09	1.24164e-07	ZNF429	19	21496682	21556270	+	5054	protein_coding	zinc finger protein 429 [Source:HGNC Symbol;Acc:HGNC:20817]	KRAB	19	14	74	409	0.105931	0.0868591	0.740202	3.0902
ENSG00000198576	19.8629	26.4776	544.107	168	-3.94163	8.72271e-09	1.24577e-07	ARC	8	142611044	142614472	-	2991	protein_coding	activity regulated cytoskeleton associated protein [Source:HGNC Symbol;Acc:HGNC:648]	-	26	31	391	161	0.244942	0.324988	6.60867	2.05546
ENSG00000083307	6.87561	0	7092.88	5886.26	-10.8722	8.73812e-09	1.24722e-07	GRHL2	8	101492432	101669726	+	6060	protein_coding	grainyhead like transcription factor 2 [Source:HGNC Symbol;Acc:HGNC:2799]	CP2	9	0	5097	5641	0.0418482	0	42.5202	35.5453
ENSG00000257084	0	0	126.634	68.8695	-9.35895	8.87102e-09	1.26542e-07	MIR200CHG	12	6963246	6964447	+	350	lincRNA	MIR200C and MIR141 host gene [Source:HGNC Symbol;Acc:HGNC:53161]	-	0	0	91	66	0	0	13.144	7.2007
ENSG00000163874	147.444	178.51	2187.56	970.434	-3.27611	8.99721e-09	1.28187e-07	ZC3H12A	1	37474552	37484379	+	3121	protein_coding	zinc finger CCCH-type containing 12A [Source:HGNC Symbol;Acc:HGNC:26259]	-	193	209	1572	930	1.74249	2.09979	25.4632	11.3786
ENSG00000185352	97.7864	81.1411	612.295	921.391	-3.09957	9.1252e-09	1.29854e-07	HS6ST3	13	96090839	96839562	+	7806	protein_coding	heparan sulfate 6-O-sulfotransferase 3 [Source:HGNC Symbol;Acc:HGNC:19134]	-	128	95	440	883	0.462049	0.381608	2.84956	4.31948
ENSG00000150540	0	0.854117	112.718	322.435	-9.07217	1.02004e-08	1.44458e-07	HNMT	2	137964020	138016364	+	4756	protein_coding	histamine N-methyltransferase [Source:HGNC Symbol;Acc:HGNC:5028]	-	0	1	81	309	0	0.00659296	0.860988	2.48094
ENSG00000228613	0.763957	0.854117	109.935	104.348	-7.05249	1.02779e-08	1.45467e-07	AC141930.1	2	1546665	1620113	-	786	antisense	-	-	1	1	79	100	0.0358496	0.0398933	5.08111	4.85821
ENSG00000163349	2872.48	2929.62	19216.3	19957.6	-2.75525	1.05757e-08	1.49504e-07	HIPK1	1	113929192	113977869	+	9280	protein_coding	homeodomain interacting protein kinase 1 [Source:HGNC Symbol;Acc:HGNC:19006]	Pkinase	3760	3430	13809	19126	11.4168	11.5896	75.226	78.7
ENSG00000172602	85.5631	58.934	1024.2	473.739	-3.37215	1.11676e-08	1.57682e-07	RND1	12	48857145	48865898	-	3099	protein_coding	Rho family GTPase 1 [Source:HGNC Symbol;Acc:HGNC:18314]	Ras	112	69	736	454	1.01836	0.698152	12.0063	5.59414
ENSG00000108639	1666.19	1589.51	16975.9	9128.35	-3.00319	1.1834e-08	1.66792e-07	SYNGR2	17	78168558	78173527	+	4074	protein_coding	synaptogyrin 2 [Source:HGNC Symbol;Acc:HGNC:11499]	-	2181	1861	12199	8748	15.0849	14.3235	151.376	81.9948
ENSG00000162591	122.997	80.287	1938.47	592.695	-3.63701	1.19336e-08	1.68096e-07	MEGF6	1	3489920	3611495	-	7039	protein_coding	multiple EGF like domains 6 [Source:HGNC Symbol;Acc:HGNC:3232]	EGF_CA	161	94	1393	568	0.644498	0.418735	10.0045	3.08132
ENSG00000014914	61.8805	61.4964	538.541	484.174	-3.05104	1.19511e-08	1.68241e-07	MTMR11	1	149928651	149936869	-	4562	protein_coding	myotubularin related protein 11 [Source:HGNC Symbol;Acc:HGNC:24307]	-	81	72	387	464	0.500307	0.49488	4.28854	3.88384
ENSG00000164125	0	3.41647	59.8379	166.956	-6.10669	1.22472e-08	1.72205e-07	FAM198B	4	158124474	158173318	-	7880	protein_coding	family with sequence similarity 198 member B [Source:HGNC Symbol;Acc:HGNC:25312]	-	0	4	43	160	0	0.0159168	0.275865	0.775341
ENSG00000205517	1.52791	0.854117	139.158	61.5652	-6.37705	1.25243e-08	1.75682e-07	RGL3	19	11384341	11419342	-	4358	protein_coding	ral guanine nucleotide dissociation stimulator like 3 [Source:HGNC Symbol;Acc:HGNC:30282]	RA	2	1	100	59	0.0129315	0.00719508	1.16002	0.516968
ENSG00000139880	343.016	353.604	4670.14	1914.78	-3.24053	1.2576e-08	1.76303e-07	CDH24	14	23047062	23057538	-	3748	protein_coding	cadherin 24 [Source:HGNC Symbol;Acc:HGNC:14265]	Cadherin	449	414	3356	1835	3.37562	3.46357	45.2664	18.6954
novel.685	0	1.70823	161.423	72	-7.15634	1.26578e-08	1.77239e-07	-	CHR_HSCHR6_MHC_SSTO_CTG1	31262119	31265640	-	2167	-	PF07654:Immunoglobulin C1-set domain|PF00129:Class I Histocompatibility antigen, domains alpha 1 and 2	MHC_I	0	2	116	69	0	0.0289397	2.70616	1.21588
ENSG00000169083	0	5.1247	2279.41	2830.96	-9.97748	1.28001e-08	1.79126e-07	AR	X	67544032	67730619	+	12775	protein_coding	androgen receptor [Source:HGNC Symbol;Acc:HGNC:644]	Androgen_recep	0	6	1638	2713	0	0.014727	6.48197	8.10938
ENSG00000256443	3.81978	0.854117	102.977	88.6956	-5.32785	1.29012e-08	1.80327e-07	AP003559.1	11	61539516	61542259	-	1831	lincRNA	-	-	5	1	74	85	0.0769464	0.0171251	2.04314	1.77268
ENSG00000229422	58.0607	63.2046	841.905	388.174	-3.34184	1.29338e-08	1.80675e-07	AL512625.2	9	62837139	62838302	-	1164	lincRNA	-	-	76	74	605	372	1.83978	1.99343	26.2758	12.2036
ENSG00000128422	2.29187	0.854117	155.857	53.2174	-6.0269	1.30442e-08	1.8211e-07	KRT17	17	41619437	41624842	-	2537	protein_coding	keratin 17 [Source:HGNC Symbol;Acc:HGNC:6427]	Filament	3	1	112	51	0.0333202	0.0123595	2.23178	0.767624
ENSG00000196581	0	0	100.194	78.2608	-9.22878	1.32924e-08	1.85465e-07	AJAP1	1	4654732	4792534	+	12405	protein_coding	adherens junctions associated protein 1 [Source:HGNC Symbol;Acc:HGNC:30801]	-	0	0	72	75	0	0	0.29342	0.230868
ENSG00000187689	0	0	108.543	72	-9.24481	1.33075e-08	1.85566e-07	AMTN	4	70518540	70532742	+	1037	protein_coding	amelotin [Source:HGNC Symbol;Acc:HGNC:33188]	-	0	0	78	69	0	0	3.8025	2.54079
ENSG00000088340	54.2409	52.1011	697.181	353.739	-3.30372	1.364e-08	1.90091e-07	FER1L4	20	35558737	35607562	-	9067	transcribed_unitary_pseudogene	fer-1 like family member 4, pseudogene [Source:HGNC Symbol;Acc:HGNC:15801]	C2	71	61	501	339	0.220649	0.210955	2.79337	1.42769
ENSG00000155265	21.3908	11.1035	260.225	174.261	-3.73434	1.37748e-08	1.91807e-07	GOLGA7B	10	97850239	97871580	+	6458	protein_coding	golgin A7 family member B [Source:HGNC Symbol;Acc:HGNC:31668]	-	28	13	187	167	0.122171	0.0631201	1.46385	0.987455
ENSG00000099822	211.616	210.113	3426.07	1128	-3.43244	1.4371e-08	1.99571e-07	HCN2	19	589893	617159	+	3408	protein_coding	hyperpolarization activated cyclic nucleotide gated potassium and sodium channel 2 [Source:HGNC Symbol;Acc:HGNC:4846]	Ion_trans	277	246	2462	1081	2.29027	2.26338	36.521	12.1123
ENSG00000105929	0	0.854117	203.171	161.739	-8.81585	1.49043e-08	2.06612e-07	ATP6V0A4	7	138706294	138799560	-	4124	protein_coding	ATPase H+ transporting V0 subunit a4 [Source:HGNC Symbol;Acc:HGNC:866]	-	0	1	146	155	0	0.00760333	1.78973	1.4352
ENSG00000228873	0	0	153.074	45.913	-9.38298	1.51936e-08	2.10375e-07	AC012307.1	2	96145602	96147012	-	197	lincRNA	-	-	0	0	110	44	0	0	28.228	8.52875
ENSG00000090020	712.007	698.667	8432.97	3822.26	-3.11883	1.54862e-08	2.1405e-07	SLC9A1	1	27098815	27166981	-	5974	protein_coding	solute carrier family 9 member A1 [Source:HGNC Symbol;Acc:HGNC:11071]	Na_H_Exchanger	932	818	6060	3663	4.39599	4.29349	51.2815	23.4137
ENSG00000215559	0	0	73.7537	101.217	-9.20321	1.55685e-08	2.14936e-07	ANKRD20A11P	21	13909574	13980437	-	4842	transcribed_unprocessed_pseudogene	ankyrin repeat domain 20 family member A11, pseudogene [Source:HGNC Symbol;Acc:HGNC:42024]	-	0	0	53	97	0	0	0.553356	0.764972
ENSG00000181381	2.29187	0	58.4463	154.435	-6.48552	1.5781e-08	2.17743e-07	DDX60L	4	168356735	168537786	-	12156	protein_coding	DExD/H-box 60 like [Source:HGNC Symbol;Acc:HGNC:26429]	DEAD	3	0	42	148	0.00695404	0	0.174668	0.464911
ENSG00000054793	1439.29	1301.67	12165.2	7852.17	-2.86843	1.58281e-08	2.18265e-07	ATP9A	20	51596514	51768634	-	8317	protein_coding	ATPase phospholipid transporting 9A (putative) [Source:HGNC Symbol;Acc:HGNC:13540]	E1-E2_ATPase	1884	1524	8742	7525	6.38294	5.74567	53.1371	34.5492
ENSG00000181830	627.208	701.23	6942.59	3706.43	-3.00285	1.6011e-08	2.20529e-07	SLC35C1	11	45804072	45813015	+	4505	protein_coding	solute carrier family 35 member C1 [Source:HGNC Symbol;Acc:HGNC:20197]	-	821	821	4989	3552	5.13517	5.7144	55.9851	30.1077
ENSG00000109436	1064.19	912.196	9441.86	5603.48	-2.92827	1.64849e-08	2.26925e-07	TBC1D9	4	140620765	140756120	-	5603	protein_coding	TBC1 domain family member 9 [Source:HGNC Symbol;Acc:HGNC:21710]	TBC	1393	1068	6785	5370	7.00546	5.97686	61.2185	36.5976
ENSG00000182580	100.078	121.285	2055.36	597.913	-3.58303	1.67079e-08	2.29861e-07	EPHB3	3	184561784	184582409	+	4532	protein_coding	EPH receptor B3 [Source:HGNC Symbol;Acc:HGNC:3394]	Pkinase_Tyr	131	142	1477	573	0.814494	0.982474	16.4757	4.82796
ENSG00000257261	11.4593	5.1247	173.947	118.956	-4.13124	1.71662e-08	2.3589e-07	AC008014.1	12	46383679	46876159	+	2227	lincRNA	-	-	15	6	125	114	0.189792	0.0844799	2.83755	1.95472
ENSG00000140465	69.52	62.3505	701.356	443.478	-3.11689	1.74776e-08	2.4003e-07	CYP1A1	15	74719542	74725610	-	3435	protein_coding	cytochrome P450 family 1 subfamily A member 1 [Source:HGNC Symbol;Acc:HGNC:2595]	p450	91	73	504	425	0.746485	0.666375	7.4175	4.72456
novel.660	13.7512	7.68705	208.737	125.217	-3.95323	1.77924e-08	2.43928e-07	-	CHR_HSCHR6_MHC_QBL_CTG1	33320165	33338637	+	2800	-	PF00225:Kinesin motor domain	Kinesin	18	9	150	120	0.181143	0.100788	2.70824	1.63652
novel.197	0	0	54.2716	126.261	-9.25035	1.86631e-08	2.55646e-07	-	9	75544471	75570690	+	1908	-	-	-	0	0	39	121	0	0	1.03333	2.42162
ENSG00000279041	17.571	25.6235	210.128	264	-3.45993	1.86688e-08	2.55646e-07	AC102945.2	8	30552345	30553766	+	1422	TEC	-	-	23	30	151	253	0.455758	0.661522	5.36823	6.79391
ENSG00000272913	0	0	65.4042	107.478	-9.18672	1.87056e-08	2.56001e-07	AC009237.14	2	95525109	95526702	-	1594	lincRNA	-	-	0	0	47	103	0	0	1.49061	2.46745
ENSG00000134326	3.05583	4.27058	109.935	85.5652	-4.7432	1.8906e-08	2.58594e-07	CMPK2	2	6840570	6866635	-	4302	protein_coding	cytidine/uridine monophosphate kinase 2 [Source:HGNC Symbol;Acc:HGNC:27015]	-	4	5	79	82	0.0261997	0.0364437	0.928347	0.727851
ENSG00000197837	20.6268	21.3529	250.484	201.391	-3.42769	1.89718e-08	2.59343e-07	HIST4H4	12	14767999	14771131	-	2578	protein_coding	histone cluster 4 H4 [Source:HGNC Symbol;Acc:HGNC:20510]	-	27	25	180	193	0.295112	0.304074	3.52974	2.85873
ENSG00000215039	48.8932	62.3505	549.674	409.043	-3.10776	1.92196e-08	2.62578e-07	CD27-AS1	12	6439001	6451567	-	3411	processed_transcript	CD27 antisense RNA 1 [Source:HGNC Symbol;Acc:HGNC:43896]	-	64	73	395	392	0.528694	0.671064	5.85422	4.38837
ENSG00000225511	6.87561	8.54117	166.989	101.217	-4.12157	1.95843e-08	2.6729e-07	LINC00475	9	92141298	92160114	+	3858	transcribed_unprocessed_pseudogene	long intergenic non-protein coding RNA 475 [Source:HGNC Symbol;Acc:HGNC:23569]	-	9	10	120	97	0.0657335	0.0812756	1.57244	0.960082
ENSG00000239389	0	0	161.423	38.6087	-9.39029	1.97213e-08	2.68811e-07	PCDHA13	5	140882208	141012344	+	5354	protein_coding	protocadherin alpha 13 [Source:HGNC Symbol;Acc:HGNC:8667]	Cadherin	0	0	116	37	0	0	1.0953	0.26389
ENSG00000164976	304.055	322.856	3175.58	1769.74	-2.97956	1.98248e-08	2.70065e-07	MYORG	9	34366670	34376853	-	6398	protein_coding	myogenesis regulating glycosidase (putative) [Source:HGNC Symbol;Acc:HGNC:19918]	Glyco_hydro_31	398	378	2282	1696	1.75285	1.85255	18.0312	10.1223
ENSG00000062725	1607.36	1755.21	8993.77	18424.7	-3.02757	2.0213e-08	2.74878e-07	APPBP2	17	60443149	60526219	-	9876	protein_coding	amyloid beta precursor protein binding protein 2 [Source:HGNC Symbol;Acc:HGNC:622]	-	2104	2055	6463	17657	6.00304	6.52459	33.0831	68.2707
ENSG00000134533	24.4466	17.9364	219.869	236.869	-3.42766	2.02785e-08	2.7561e-07	RERG	12	15107783	15348675	-	4157	protein_coding	RAS like estrogen regulated growth inhibitor [Source:HGNC Symbol;Acc:HGNC:15980]	-	32	21	158	227	0.216908	0.158402	1.92146	2.08519
ENSG00000140939	207.032	252.818	3149.14	1251.13	-3.25822	2.03033e-08	2.75629e-07	NOL3	16	67170154	67175735	+	2992	protein_coding	nucleolar protein 3 [Source:HGNC Symbol;Acc:HGNC:7869]	CARD	271	296	2263	1199	2.5522	3.10208	38.2364	15.3023
ENSG00000143578	326.973	317.731	2746.98	1905.39	-2.85107	2.03306e-08	2.75636e-07	CREB3L4	1	153967534	153974363	+	2904	protein_coding	cAMP responsive element binding protein 3 like 4 [Source:HGNC Symbol;Acc:HGNC:18854]	bZIP_1	428	372	1974	1826	4.15292	4.0167	34.364	24.0106
ENSG00000130702	2170.4	1959.34	34999.6	10177	-3.45141	2.03313e-08	2.75636e-07	LAMA5	20	62307955	62367312	-	14291	protein_coding	laminin subunit alpha 5 [Source:HGNC Symbol;Acc:HGNC:6485]	Laminin_G_2	2841	2294	25151	9753	5.60164	5.03331	88.9706	26.06
ENSG00000167632	375.103	391.185	4256.84	2096.35	-3.05136	2.03388e-08	2.75636e-07	TRAPPC9	8	139730343	140458579	-	7055	protein_coding	trafficking protein particle complex 9 [Source:HGNC Symbol;Acc:HGNC:30832]	-	491	458	3059	2009	1.96106	2.03559	21.9198	10.8738
ENSG00000277013	0	1.70823	105.76	98.0869	-6.96466	2.03992e-08	2.76296e-07	AC008556.1	19	33906352	33908391	+	2040	lincRNA	-	-	0	2	76	94	0	0.0307413	1.88338	1.75953
ENSG00000130558	171.89	178.51	1930.12	1001.74	-3.0644	2.05401e-08	2.78045e-07	OLFM1	9	135075422	135121179	+	6123	protein_coding	olfactomedin 1 [Source:HGNC Symbol;Acc:HGNC:17187]	-	225	209	1387	960	1.03544	1.0703	11.4516	5.98695
ENSG00000117480	126.817	141.783	1668.5	765.913	-3.17971	2.0866e-08	2.81972e-07	FAAH	1	46394265	46413848	+	2776	protein_coding	fatty acid amide hydrolase [Source:HGNC Symbol;Acc:HGNC:3553]	Amidase	166	166	1199	734	1.68498	1.87504	21.835	10.0966
ENSG00000164938	244.466	257.943	1380.45	2954.09	-3.10927	2.09954e-08	2.83558e-07	TP53INP1	8	94925972	94949411	-	5676	protein_coding	tumor protein p53 inducible nuclear protein 1 [Source:HGNC Symbol;Acc:HGNC:18022]	-	320	302	992	2831	1.5886	1.66835	8.83533	19.0457
ENSG00000108443	2098.59	2224.97	11443	23933.2	-3.03253	2.15662e-08	2.90603e-07	RPS6KB1	17	59893046	59950564	+	7687	protein_coding	ribosomal protein S6 kinase B1 [Source:HGNC Symbol;Acc:HGNC:10436]	Pkinase	2747	2605	8223	22936	10.0695	10.6261	54.0788	113.936
ENSG00000172819	784.583	683.293	7815.11	3987.13	-3.00711	2.19453e-08	2.95204e-07	RARG	12	53210567	53232980	-	5127	protein_coding	retinoic acid receptor gamma [Source:HGNC Symbol;Acc:HGNC:9866]	zf-C4	1027	800	5616	3821	5.64434	4.89271	55.3755	28.4585
ENSG00000089127	0	0.854117	164.206	176.348	-8.71722	2.20941e-08	2.97038e-07	OAS1	12	112906777	112933222	+	4947	protein_coding	2'-5'-oligoadenylate synthetase 1 [Source:HGNC Symbol;Acc:HGNC:8086]	NTP_transf_2	0	1	118	169	0	0.00633842	1.20585	1.3045
ENSG00000171236	0.763957	0.854117	104.368	92.8695	-6.93254	2.23663e-08	3.00355e-07	LRG1	19	4536409	4540474	-	3133	protein_coding	leucine rich alpha-2-glycoprotein 1 [Source:HGNC Symbol;Acc:HGNC:29480]	-	1	1	75	89	0.00899386	0.0100083	1.21019	1.08475
ENSG00000115216	1582.15	1545.95	14142.6	8622.26	-2.8634	2.2397e-08	3.00596e-07	NRBP1	2	27427790	27442259	+	5329	protein_coding	nuclear receptor binding protein 1 [Source:HGNC Symbol;Acc:HGNC:7993]	Pkinase_Tyr	2071	1810	10163	8263	10.9507	10.6501	96.4117	59.2094
ENSG00000172403	28.2664	17.9364	225.436	271.304	-3.42379	2.26112e-08	3.03299e-07	SYNPO2	4	118850688	119061247	+	14034	protein_coding	synaptopodin 2 [Source:HGNC Symbol;Acc:HGNC:17732]	-	37	21	162	260	0.0742894	0.0469203	0.583562	0.707442
novel.148	28.2664	23.0611	500.968	175.304	-3.71686	2.27581e-08	3.05096e-07	-	4	1004548	1008191	+	1946	-	-	-	37	27	360	168	0.535754	0.435054	9.35219	3.29659
ENSG00000086062	1079.47	1059.96	6707.41	7232.35	-2.70392	2.40675e-08	3.22284e-07	B4GALT1	9	33104082	33167356	-	4901	protein_coding	beta-1,4-galactosyltransferase 1 [Source:HGNC Symbol;Acc:HGNC:924]	-	1413	1241	4820	6931	8.12389	7.9398	49.7183	54.002
ENSG00000234949	1.52791	0	128.025	78.2608	-7.01157	2.53109e-08	3.38166e-07	AC104667.2	2	237591020	237595981	+	1656	antisense	-	-	2	0	92	75	0.0340311	0	2.80854	1.72942
ENSG00000149043	0	0.854117	274.141	98.0869	-8.84176	2.61262e-08	3.48664e-07	SYT8	11	1828307	1837521	+	4704	protein_coding	synaptotagmin 8 [Source:HGNC Symbol;Acc:HGNC:19264]	-	0	1	197	94	0	0.00666585	2.11715	0.763061
ENSG00000158792	286.484	289.546	4576.9	1449.39	-3.38682	2.61804e-08	3.49191e-07	SPATA2L	16	89696343	89701705	-	2482	protein_coding	spermatogenesis associated 2 like [Source:HGNC Symbol;Acc:HGNC:28393]	-	375	339	3289	1389	4.25732	4.28273	66.9909	21.3697
ENSG00000163121	0	0	144.724	40.6956	-9.28083	2.62448e-08	3.49651e-07	NEURL3	2	96497643	96508109	-	2497	protein_coding	neuralized E3 ubiquitin protein ligase 3 [Source:HGNC Symbol;Acc:HGNC:25162]	-	0	0	104	39	0	0	2.10556	0.59641
ENSG00000083290	95.4946	101.64	765.368	691.826	-2.88596	2.62594e-08	3.49651e-07	ULK2	17	19770829	19867936	-	9843	protein_coding	unc-51 like autophagy activating kinase 2 [Source:HGNC Symbol;Acc:HGNC:13480]	Pkinase	125	119	550	663	0.35784	0.37909	2.82481	2.57208
ENSG00000180176	0.763957	0	275.533	97.0434	-8.85161	2.65348e-08	3.5312e-07	TH	11	2163929	2171877	-	3243	protein_coding	tyrosine hydroxylase [Source:HGNC Symbol;Acc:HGNC:11782]	-	1	0	198	93	0.00868879	0	3.08654	1.09505
novel.414	9.16748	5.97882	438.347	46.9565	-4.99526	2.67181e-08	3.55158e-07	-	CHR_HSCHR16_3_CTG1	4314943	4339887	+	5316	-	-	-	12	7	315	45	0.0636067	0.0412891	2.99557	0.323241
ENSG00000107099	201.685	228.903	1605.88	1379.48	-2.79357	2.76342e-08	3.66304e-07	DOCK8	9	214854	465259	+	13784	protein_coding	dedicator of cytokinesis 8 [Source:HGNC Symbol;Acc:HGNC:19191]	Ded_cyto	264	268	1154	1322	0.539678	0.609652	4.23238	3.66231
ENSG00000204282	9.16748	13.6659	210.128	120	-3.856	2.96484e-08	3.91466e-07	TNRC6C-AS1	17	78107398	78111799	-	4402	processed_transcript	TNRC6C antisense RNA 1 [Source:HGNC Symbol;Acc:HGNC:44360]	-	12	16	151	115	0.0768135	0.113971	1.73413	0.997577
ENSG00000008517	3.05583	0.854117	107.152	68.8695	-5.46282	3.2224e-08	4.24286e-07	IL32	16	3065297	3082192	+	3209	protein_coding	interleukin 32 [Source:HGNC Symbol;Acc:HGNC:16830]	-	4	1	77	66	0.0351234	0.00977131	1.21304	0.785368
ENSG00000125148	466.777	391.185	4110.72	2360.35	-2.91476	3.303e-08	4.34413e-07	MT2A	16	56608199	56609497	+	1299	protein_coding	metallothionein 2A [Source:HGNC Symbol;Acc:HGNC:7406]	-	611	458	2954	2262	13.2537	11.0555	114.962	66.494
ENSG00000226945	0	0	86.2779	69.913	-9.03665	3.3162e-08	4.35907e-07	AC098935.1	1	206907619	206908229	+	611	processed_pseudogene	-	-	0	0	62	67	0	0	5.12984	4.18728
ENSG00000260260	153.555	123.847	1305.3	834.782	-2.94687	3.33492e-08	4.38124e-07	SNHG19	16	2154797	2155358	-	342	lincRNA	small nucleolar RNA host gene 19 [Source:HGNC Symbol;Acc:HGNC:49574]	-	201	145	938	800	16.5606	13.2943	138.653	89.3229
ENSG00000157554	0	0	77.9284	77.2174	-9.02806	3.35825e-08	4.40944e-07	ERG	21	38380027	38661780	-	7588	protein_coding	ERG, ETS transcription factor [Source:HGNC Symbol;Acc:HGNC:3446]	Ets	0	0	56	74	0	0	0.373091	0.372394
ENSG00000183840	0	1.70823	139.158	66.7826	-6.97521	3.43393e-08	4.50129e-07	GPR39	2	132416574	132646559	+	3387	protein_coding	G protein-coupled receptor 39 [Source:HGNC Symbol;Acc:HGNC:4496]	7tm_1	0	2	100	64	0	0.0185156	1.49258	0.721545
ENSG00000182718	2678.43	2891.18	20086	15989.2	-2.69535	3.55414e-08	4.6537e-07	ANXA2	15	60347134	60402883	-	8824	protein_coding	annexin A2 [Source:HGNC Symbol;Acc:HGNC:537]	-	3506	3385	14434	15323	11.1957	12.0286	82.6942	66.3097
ENSG00000167565	161.959	178.51	1444.46	1014.26	-2.85217	3.67906e-08	4.80783e-07	SERTAD3	19	40440844	40444705	-	2218	protein_coding	SERTA domain containing 3 [Source:HGNC Symbol;Acc:HGNC:17931]	-	212	209	1038	972	2.69328	2.95466	23.6586	16.7341
ENSG00000164920	203.212	222.924	2368.47	1147.83	-3.04442	3.6868e-08	4.81405e-07	OSR2	8	98944403	98952104	+	2930	protein_coding	odd-skipped related transciption factor 2 [Source:HGNC Symbol;Acc:HGNC:15830]	zf-C2H2	266	261	1702	1100	2.55812	2.79316	29.3661	14.3359
ENSG00000197162	34.378	18.7906	221.261	362.087	-3.45335	3.69112e-08	4.81702e-07	ZNF785	16	30573740	30585771	-	4952	protein_coding	zinc finger protein 785 [Source:HGNC Symbol;Acc:HGNC:26496]	-	45	22	159	347	0.256058	0.139304	1.62319	2.67576
ENSG00000159450	16.0431	16.2282	168.381	195.13	-3.49437	3.90717e-08	5.09053e-07	TCHH	1	152106317	152115454	-	6995	protein_coding	trichohyalin [Source:HGNC Symbol;Acc:HGNC:11791]	-	21	19	121	187	0.0845937	0.0851704	0.874483	1.02083
ENSG00000265972	545.465	569.696	3224.29	4116.52	-2.71878	3.99588e-08	5.20037e-07	TXNIP	1	145992435	145996600	-	3625	protein_coding	thioredoxin interacting protein [Source:HGNC Symbol;Acc:HGNC:16952]	-	714	667	2317	3945	5.55005	5.76953	32.3126	41.5564
ENSG00000233622	6.11165	3.41647	180.905	62.6087	-4.66294	4.0955e-08	5.32415e-07	CYP2T1P	19	40808474	40811390	-	2698	transcribed_unitary_pseudogene	cytochrome P450 family 2 subfamily T member 1, pseudogene [Source:HGNC Symbol;Acc:HGNC:18852]	p450	8	4	130	60	0.0835515	0.046488	2.43588	0.849196
ENSG00000259459	0	0	61.2295	91.8261	-9.0107	4.10317e-08	5.33119e-07	LINC02568	15	63390136	63438320	+	2230	lincRNA	long intergenic non-protein coding RNA 2568 [Source:HGNC Symbol;Acc:HGNC:51430]	-	0	0	44	88	0	0	0.997474	1.50687
ENSG00000197261	44.3095	42.7058	357.636	360	-3.04375	4.18137e-08	5.4298e-07	C6orf141	6	49550646	49561907	+	2940	protein_coding	chromosome 6 open reading frame 141 [Source:HGNC Symbol;Acc:HGNC:21351]	-	58	50	257	345	0.555888	0.533268	4.41916	4.48095
ENSG00000107331	1429.36	1348.65	22780.1	6453.91	-3.39547	4.20231e-08	5.45399e-07	ABCA2	9	137007227	137028922	-	11514	protein_coding	ATP binding cassette subfamily A member 2 [Source:HGNC Symbol;Acc:HGNC:32]	ABC_tran	1871	1579	16370	6185	4.57882	4.3001	71.8747	20.5122
ENSG00000104881	272.732	259.651	3875.55	1315.83	-3.28526	4.21512e-08	5.46761e-07	PPP1R13L	19	45379634	45406349	-	5032	protein_coding	protein phosphatase 1 regulatory subunit 13 like [Source:HGNC Symbol;Acc:HGNC:18838]	-	357	304	2785	1261	1.9991	1.89433	27.9794	9.56915
novel.168	0	0	144.724	33.3913	-9.22251	4.37297e-08	5.66303e-07	-	6	18016590	18051702	-	662	-	-	-	0	0	104	32	0	0	7.94198	1.84583
ENSG00000213853	1427.83	1418.69	9185.81	8638.95	-2.6466	4.38122e-08	5.67061e-07	EMP2	16	10528422	10580698	-	8718	protein_coding	epithelial membrane protein 2 [Source:HGNC Symbol;Acc:HGNC:3334]	-	1869	1661	6601	8279	6.04086	5.97414	38.2778	36.2627
ENSG00000261804	0.763957	0	218.478	105.391	-8.64953	4.42695e-08	5.72352e-07	AC007342.4	16	53373493	53384745	+	1106	lincRNA	-	-	1	0	157	101	0.0254772	0	7.17626	3.48711
novel.193	0	0	69.5789	79.3043	-8.9694	4.51151e-08	5.82646e-07	-	8	121140050	121146135	-	1604	-	-	-	0	0	50	76	0	0	1.57587	1.80929
ENSG00000112414	329.265	301.503	1603.1	3814.96	-3.10278	4.61538e-08	5.94759e-07	ADGRG6	6	142301854	142446266	+	8473	protein_coding	adhesion G protein-coupled receptor G6 [Source:HGNC Symbol;Acc:HGNC:13841]	7tm_2	431	353	1152	3656	1.43333	1.30635	6.87336	16.4766
ENSG00000126709	95.4946	110.181	1004.72	609.391	-2.97206	4.6453e-08	5.98288e-07	IFI6	1	27666061	27672218	-	865	protein_coding	interferon alpha inducible protein 6 [Source:HGNC Symbol;Acc:HGNC:4054]	-	125	129	722	584	4.07193	4.67623	42.1963	25.7808
ENSG00000151929	1721.19	1676.63	15539.8	8814.26	-2.84143	4.67147e-08	6.01003e-07	BAG3	10	119651370	119677819	+	2747	protein_coding	BCL2 associated athanogene 3 [Source:HGNC Symbol;Acc:HGNC:939]	WW	2253	1963	11167	8447	23.1105	22.407	205.509	117.42
ENSG00000012171	129.873	138.367	1603.1	718.956	-3.11337	4.77106e-08	6.13147e-07	SEMA3B	3	50267558	50277546	+	5768	protein_coding	semaphorin 3B [Source:HGNC Symbol;Acc:HGNC:10724]	Sema	170	162	1152	689	0.830482	0.880668	10.0967	4.56134
ENSG00000180155	31.3222	28.1858	527.408	185.739	-3.58078	4.79012e-08	6.15262e-07	LYNX1	8	142771197	142777810	-	5022	protein_coding	Ly6/neurotoxin 1 [Source:HGNC Symbol;Acc:HGNC:29604]	-	41	33	379	178	0.230045	0.206044	3.81519	1.35345
ENSG00000255690	0	0	96.0189	55.3043	-8.98926	4.93027e-08	6.31888e-07	TRIL	7	28953358	28958292	-	4935	protein_coding	TLR4 interactor with leucine rich repeats [Source:HGNC Symbol;Acc:HGNC:22200]	-	0	0	69	53	0	0	0.706831	0.410098
ENSG00000140057	91.6748	74.3081	495.402	882.782	-3.05383	4.96497e-08	6.35991e-07	AK7	14	96392111	96489427	+	5001	protein_coding	adenylate kinase 7 [Source:HGNC Symbol;Acc:HGNC:20091]	Dpy-30	120	87	356	846	0.676131	0.545488	3.59871	6.4597
ENSG00000249116	9.16748	5.1247	151.682	97.0434	-4.11139	4.97249e-08	6.36608e-07	AC025183.1	5	1883966	1884649	+	425	antisense	-	-	12	6	109	93	0.795607	0.442675	12.9656	8.35589
ENSG00000213967	5.3477	4.27058	41.7474	260.869	-4.97616	5.00385e-08	6.40108e-07	ZNF726	19	23914876	23945159	+	6289	protein_coding	zinc finger protein 726 [Source:HGNC Symbol;Acc:HGNC:32462]	KRAB	7	5	30	250	0.0313634	0.0249294	0.241153	1.51795
ENSG00000188868	3.81978	0.854117	84.8863	87.6521	-5.17758	5.01578e-08	6.41107e-07	ZNF563	19	12317477	12333720	-	2847	protein_coding	zinc finger protein 563 [Source:HGNC Symbol;Acc:HGNC:30498]	KRAB	5	1	61	84	0.0494868	0.0110137	1.08317	1.12665
ENSG00000253910	3.81978	1.70823	77.9284	94.9565	-4.95149	5.11491e-08	6.53071e-07	PCDHGB2	5	141360042	141512979	+	4769	protein_coding	protocadherin gamma subfamily B, 2 [Source:HGNC Symbol;Acc:HGNC:8709]	Cadherin	5	2	56	91	0.0295426	0.01315	0.593628	0.72864
ENSG00000162975	29.0303	14.52	468.962	153.391	-3.83123	5.22931e-08	6.66596e-07	KCNF1	2	10911937	10914225	+	2289	protein_coding	potassium voltage-gated channel modifier subfamily F member 1 [Source:HGNC Symbol;Acc:HGNC:6246]	Ion_trans	38	17	337	147	0.467783	0.232877	7.44283	2.45228
ENSG00000105668	3.05583	7.68705	219.869	59.4782	-4.70927	5.24726e-08	6.68522e-07	UPK1A	19	35666516	35678483	+	1366	protein_coding	uroplakin 1A [Source:HGNC Symbol;Acc:HGNC:12577]	Tetraspannin	4	9	158	57	0.0825117	0.206592	5.84736	1.59339
ENSG00000144802	148.208	158.866	1014.46	1057.04	-2.75418	5.30692e-08	6.75759e-07	NFKBIZ	3	101827991	101861022	+	5902	protein_coding	NFKB inhibitor zeta [Source:HGNC Symbol;Acc:HGNC:29805]	-	194	186	729	1013	0.926209	0.988181	6.24428	6.55404
ENSG00000179542	0	0	37.5726	126.261	-9.11137	5.31199e-08	6.7604e-07	SLITRK4	X	143622790	143635777	-	8914	protein_coding	SLIT and NTRK like family member 4 [Source:HGNC Symbol;Acc:HGNC:23502]	-	0	0	27	121	0	0	0.153125	0.518336
ENSG00000123572	0.763957	0.854117	94.6274	84.5217	-6.79372	5.33447e-08	6.78535e-07	NRK	X	105822543	105958610	+	9573	protein_coding	Nik related kinase [Source:HGNC Symbol;Acc:HGNC:25391]	Pkinase	1	1	68	81	0.00294346	0.00327548	0.359099	0.323099
ENSG00000131080	6.87561	11.1035	125.242	137.739	-3.87702	5.37628e-08	6.83486e-07	EDA2R	X	66595637	66639298	-	3579	protein_coding	ectodysplasin A2 receptor [Source:HGNC Symbol;Acc:HGNC:17756]	-	9	13	90	132	0.0708577	0.113895	1.27126	1.40835
ENSG00000140836	656.239	597.882	4507.32	3559.3	-2.68519	5.74408e-08	7.29065e-07	ZFHX3	16	72782885	73891871	-	22594	protein_coding	zinc finger homeobox 3 [Source:HGNC Symbol;Acc:HGNC:777]	Homeobox	859	700	3239	3411	1.07129	0.971466	7.24722	5.76484
ENSG00000183963	789.167	789.204	9909.43	3789.91	-3.1175	6.0318e-08	7.62714e-07	SMTN	22	31064105	31104757	+	10242	protein_coding	smoothelin [Source:HGNC Symbol;Acc:HGNC:11126]	-	1033	924	7121	3632	2.84199	2.82885	35.1488	13.5413
ENSG00000182871	1359.08	1223.09	13858.7	6387.13	-2.97089	6.04143e-08	7.63522e-07	COL18A1	21	45405137	45513720	+	8525	protein_coding	collagen type XVIII alpha 1 chain [Source:HGNC Symbol;Acc:HGNC:2195]	Collagen	1779	1432	9959	6121	5.88014	5.2671	59.0575	27.4174
ENSG00000171813	287.248	325.418	4919.23	1426.43	-3.37243	6.06851e-08	7.66125e-07	PWWP2B	10	132397168	132417863	+	2651	protein_coding	PWWP domain containing 2B [Source:HGNC Symbol;Acc:HGNC:25150]	PWWP	376	381	3535	1367	3.99654	4.50648	67.4114	19.6905
ENSG00000133985	148.208	130.68	1116.05	837.913	-2.80814	6.24015e-08	7.87373e-07	TTC9	14	70641787	70675360	+	5217	protein_coding	tetratricopeptide repeat domain 9 [Source:HGNC Symbol;Acc:HGNC:20267]	TPR_2	194	153	802	803	1.04782	0.919588	7.77154	5.87751
ENSG00000188191	614.221	603.006	7744.14	2915.48	-3.13035	6.34213e-08	7.9896e-07	PRKAR1B	7	549197	727650	-	4491	protein_coding	protein kinase cAMP-dependent type I regulatory subunit beta [Source:HGNC Symbol;Acc:HGNC:9390]	cNMP_binding	804	706	5565	2794	5.04451	4.92929	62.6435	23.7565
ENSG00000168143	67.2282	57.2258	331.196	994.434	-3.41359	6.3696e-08	8.01992e-07	FAM83B	6	54846771	54942022	+	3167	protein_coding	family with sequence similarity 83 member B [Source:HGNC Symbol;Acc:HGNC:21357]	-	88	67	238	953	0.782963	0.66336	3.79912	11.4906
ENSG00000105711	74.8677	51.247	704.139	395.478	-3.1222	6.5026e-08	8.1743e-07	SCN1B	19	35030466	35040449	+	7993	protein_coding	sodium voltage-gated channel beta subunit 1 [Source:HGNC Symbol;Acc:HGNC:10586]	V-set	98	60	506	379	0.34548	0.235377	3.20033	1.81062
ENSG00000278952	11.4593	11.1035	143.333	141.913	-3.65977	6.51258e-08	8.18249e-07	AP003068.4	11	65118310	65119111	+	802	TEC	-	-	15	13	103	136	0.527015	0.508267	6.49257	6.47535
ENSG00000277224	4.58374	5.97882	90.4526	111.652	-4.26362	6.68744e-08	8.38879e-07	HIST1H2BF	6	26199520	26200715	+	1196	protein_coding	histone cluster 1 H2B family member f [Source:HGNC Symbol;Acc:HGNC:4752]	Histone	6	7	65	107	0.14136	0.183523	2.74749	3.41626
ENSG00000187017	5.3477	0	5634.5	2016	-10.4701	6.70605e-08	8.40766e-07	ESPN	1	6424776	6461367	+	6952	protein_coding	espin [Source:HGNC Symbol;Acc:HGNC:13281]	-	7	0	4049	1932	0.0283723	0	29.4437	10.612
ENSG00000131389	1025.99	925.862	6789.51	5483.48	-2.6525	6.81039e-08	8.53395e-07	SLC6A6	3	14402576	14489349	+	8254	protein_coding	solute carrier family 6 member 6 [Source:HGNC Symbol;Acc:HGNC:11052]	SNF	1343	1084	4879	5255	4.58477	4.11801	29.8827	24.3112
ENSG00000188959	1.52791	1.70823	83.4947	70.9565	-5.57872	6.81902e-08	8.54024e-07	C9orf152	9	110190048	110208189	-	2947	protein_coding	chromosome 9 open reading frame 152 [Source:HGNC Symbol;Acc:HGNC:31455]	-	2	2	60	68	0.019123	0.02128	1.02926	0.881105
ENSG00000162976	132.164	122.993	741.712	1090.43	-2.84434	6.82793e-08	8.54686e-07	PQLC3	2	11155198	11178874	+	2275	protein_coding	PQ loop repeat containing 3 [Source:HGNC Symbol;Acc:HGNC:28503]	-	173	144	533	1045	2.14275	1.98474	11.844	17.5402
ENSG00000197461	64.1723	80.287	815.465	421.565	-3.09792	6.85332e-08	8.56956e-07	PDGFA	7	497258	520296	-	4151	protein_coding	platelet derived growth factor subunit A [Source:HGNC Symbol;Acc:HGNC:8799]	-	84	94	586	404	0.570208	0.710064	7.13672	3.71644
ENSG00000237440	3.05583	5.1247	37.5726	240	-5.09619	6.94319e-08	8.67733e-07	ZNF737	19	20535825	20565809	-	3539	protein_coding	zinc finger protein 737 [Source:HGNC Symbol;Acc:HGNC:32468]	KRAB	4	6	27	230	0.0318483	0.053161	0.385689	2.48168
ENSG00000235949	2.29187	2.56235	96.0189	66.7826	-5.0682	6.98941e-08	8.73047e-07	AC061961.1	2	154696462	154697817	-	432	antisense	-	-	3	3	69	64	0.195679	0.217751	8.07456	5.65712
ENSG00000167996	7223.21	7411.17	74487	35665	-2.91205	7.01568e-08	8.75866e-07	FTH1	11	61959718	61967660	-	2030	protein_coding	ferritin heavy chain 1 [Source:HGNC Symbol;Acc:HGNC:3976]	-	9455	8677	53527	34179	131.242	134.028	1333	642.928
novel.731	20.6268	24.7694	166.989	322.435	-3.4335	7.03249e-08	8.775e-07	-	KI270744.1	117181	140929	-	3347	-	PF01352:KRAB box	KRAB	27	29	120	309	0.227308	0.271685	1.81251	3.52534
ENSG00000180787	2.29187	0.854117	50.0968	121.043	-5.74628	7.06172e-08	8.80682e-07	ZFP3	17	5078248	5096374	+	5206	protein_coding	ZFP3 zinc finger protein [Source:HGNC Symbol;Acc:HGNC:12861]	zf-C2H2	3	1	36	116	0.0162377	0.00602308	0.349584	0.850849
ENSG00000126561	0	1.70823	162.815	46.9565	-6.99853	7.09726e-08	8.84646e-07	STAT5A	17	42287547	42311943	+	5754	protein_coding	signal transducer and activator of transcription 5A [Source:HGNC Symbol;Acc:HGNC:11366]	STAT_bind	0	2	117	45	0	0.0108989	1.02794	0.298636
ENSG00000143367	489.696	487.701	3618.1	2693.22	-2.69083	7.10623e-08	8.8526e-07	TUFT1	1	151540305	151583583	+	3878	protein_coding	tuftelin 1 [Source:HGNC Symbol;Acc:HGNC:12422]	-	641	571	2600	2581	4.65754	4.6169	33.8937	25.4144
ENSG00000069812	12.9873	13.6659	218.478	120	-3.66497	7.10968e-08	8.8526e-07	HES2	1	6412418	6424670	-	5407	protein_coding	hes family bHLH transcription factor 2 [Source:HGNC Symbol;Acc:HGNC:16005]	-	17	16	157	115	0.0885929	0.0927868	1.4679	0.812158
ENSG00000102048	1.52791	0	116.893	67.8261	-6.85264	7.15744e-08	8.90267e-07	ASB9	X	15235288	15270467	-	2363	protein_coding	ankyrin repeat and SOCS box containing 9 [Source:HGNC Symbol;Acc:HGNC:17184]	-	2	0	84	65	0.0238491	0	1.79709	1.05038
ENSG00000090013	475.945	454.39	10585.7	1858.43	-3.74144	7.26539e-08	9.03219e-07	BLVRB	19	40447765	40465840	-	1689	protein_coding	biliverdin reductase B [Source:HGNC Symbol;Acc:HGNC:1063]	-	623	532	7607	1781	10.3936	9.87653	227.687	40.2655
ENSG00000261578	32.8501	28.1858	224.044	340.174	-3.20877	7.33051e-08	9.10835e-07	AP003119.3	11	76800364	76804555	+	4192	sense_overlapping	-	-	43	33	161	326	0.289037	0.24684	1.94159	2.96958
ENSG00000196517	171.89	158.012	1863.32	850.435	-3.03962	7.41523e-08	9.20393e-07	SLC6A9	1	43991500	44031467	-	5159	protein_coding	solute carrier family 6 member 9 [Source:HGNC Symbol;Acc:HGNC:11056]	SNF	225	185	1339	815	1.22892	1.12442	13.1211	6.03241
ENSG00000197406	3.81978	2.56235	147.507	51.1304	-4.94811	7.60212e-08	9.42598e-07	DIO3	14	101561351	101563452	+	2102	protein_coding	iodothyronine deiodinase 3 [Source:HGNC Symbol;Acc:HGNC:2885]	-	5	3	106	49	0.0670261	0.0447519	2.54933	0.890148
ENSG00000260285	51.949	63.2046	599.77	357.913	-3.05579	7.66345e-08	9.49207e-07	AL133367.1	14	103525010	103529072	-	4063	antisense	-	-	68	74	431	343	0.471594	0.571094	5.36271	3.22364
ENSG00000186193	881.606	855.825	10980.9	4068.52	-3.11458	7.79879e-08	9.65463e-07	SAPCD2	9	137062124	137070588	-	3848	protein_coding	suppressor APC domain containing 2 [Source:HGNC Symbol;Acc:HGNC:28055]	-	1154	1002	7891	3899	8.4504	8.16498	103.669	38.6916
ENSG00000149243	27.5024	18.7906	304.756	180.522	-3.38588	7.9747e-08	9.85173e-07	KLHL35	11	75422394	75430629	-	5041	protein_coding	kelch like family member 35 [Source:HGNC Symbol;Acc:HGNC:26597]	BACK	36	22	219	173	0.20123	0.136845	2.19625	1.31047
ENSG00000152518	1849.54	1818.41	13306.3	9768	-2.65321	8.08756e-08	9.98072e-07	ZFP36L2	2	43222402	43226609	-	3696	protein_coding	ZFP36 ring finger protein like 2 [Source:HGNC Symbol;Acc:HGNC:1108]	zf-CCCH	2421	2129	9562	9361	18.4573	18.062	130.789	96.7139
ENSG00000184669	19.8629	10.2494	240.743	139.826	-3.65242	8.28999e-08	1.02198e-06	OR7E14P	11	17013998	17053024	+	1370	transcribed_unprocessed_pseudogene	olfactory receptor family 7 subfamily E member 14 pseudogene [Source:HGNC Symbol;Acc:HGNC:8385]	-	26	12	173	134	0.53476	0.274652	6.3838	3.73493
ENSG00000245060	36.6699	44.4141	349.286	312	-3.02844	8.3655e-08	1.03075e-06	LINC00847	5	180830957	180835726	+	2453	lincRNA	long intergenic non-protein coding RNA 847 [Source:HGNC Symbol;Acc:HGNC:45050]	-	48	52	251	299	0.551379	0.664704	5.17285	4.65449
ENSG00000261716	124.525	136.659	663.783	1610.09	-3.12273	8.37011e-08	1.03078e-06	AC239868.1	1	149844498	149849024	-	4527	sense_overlapping	-	-	163	160	477	1543	1.01457	1.10824	5.32674	13.0153
ENSG00000198502	16.807	35.8729	345.112	219.13	-3.42419	8.4293e-08	1.03729e-06	HLA-DRB5	6	32517343	32530287	-	1260	protein_coding	major histocompatibility complex, class II, DR beta 5 [Source:HGNC Symbol;Acc:HGNC:4953]	C1-set	22	42	248	210	0.491993	1.0452	9.95027	6.36425
ENSG00000123453	2.29187	2.56235	158.64	39.6522	-5.34978	8.43531e-08	1.03729e-06	SARDH	9	133663560	133739955	-	5120	protein_coding	sarcosine dehydrogenase [Source:HGNC Symbol;Acc:HGNC:10536]	DAO	3	3	114	38	0.0165104	0.0183727	1.12561	0.283408
ENSG00000003147	106.19	111.889	602.554	1071.65	-2.94125	8.43963e-08	1.03729e-06	ICA1	7	8113184	8262687	-	4891	protein_coding	islet cell autoantigen 1 [Source:HGNC Symbol;Acc:HGNC:5343]	Arfaptin	139	131	433	1027	0.800799	0.839839	4.47552	8.0181
novel.643	0	0	122.459	33.3913	-9.02968	8.44052e-08	1.03729e-06	-	CHR_HSCHR6_MHC_MCF_CTG1	32860938	32864191	-	2142	-	PF00005:ABC transporter	ABC_tran	0	0	88	32	0	0	2.07691	0.570465
ENSG00000161243	73.3398	74.3081	677.699	446.609	-2.92818	8.63821e-08	1.06103e-06	FBXO27	19	38990714	39032785	-	2833	protein_coding	F-box protein 27 [Source:HGNC Symbol;Acc:HGNC:18753]	-	96	87	487	428	0.954841	0.962931	8.69033	5.76894
ENSG00000225556	0.763957	0	141.941	131.478	-8.40705	8.67735e-08	1.06529e-06	C2CD4D	1	151837819	151840557	-	1757	protein_coding	C2 calcium dependent domain containing 4D [Source:HGNC Symbol;Acc:HGNC:37210]	C2	1	0	102	126	0.0160374	0	2.93482	2.7384
novel.83	0	0	75.1453	60.5217	-8.8333	8.78509e-08	1.07795e-06	-	17	61488362	61490931	-	2570	-	-	-	0	0	54	58	0	0	1.06222	0.861775
ENSG00000185275	0.763957	0	235.177	75.1304	-8.58755	8.81063e-08	1.08053e-06	CD24P4	Y	18992467	18992709	-	243	processed_pseudogene	CD24 molecule pseudogene 4 [Source:HGNC Symbol;Acc:HGNC:1649]	-	1	0	169	72	0.115958	0	35.1588	11.3142
ENSG00000177076	57.2967	39.2894	393.817	382.956	-3.00596	8.84365e-08	1.08401e-06	ACER2	9	19409059	19452020	+	2238	protein_coding	alkaline ceramidase 2 [Source:HGNC Symbol;Acc:HGNC:23675]	-	75	46	283	367	0.944295	0.644496	6.39264	6.26188
ENSG00000136830	2579.88	2486.33	32142.7	11573.2	-3.10914	9.20599e-08	1.12522e-06	FAM129B	9	127505339	127578989	-	4629	protein_coding	family with sequence similarity 129 member B [Source:HGNC Symbol;Acc:HGNC:25282]	-	3377	2911	23098	11091	20.5566	19.7187	252.256	91.4918
ENSG00000130173	6.11165	1.70823	173.947	55.3043	-4.85122	9.28529e-08	1.13227e-06	ANGPTL8	19	11237450	11241943	+	1223	protein_coding	angiopoietin like 8 [Source:HGNC Symbol;Acc:HGNC:24933]	-	8	2	125	53	0.184319	0.0512774	5.16699	1.65481
ENSG00000106367	1268.93	1334.98	10065.3	6727.3	-2.68903	9.31977e-08	1.13589e-06	AP1S1	7	101154400	101161596	+	1756	protein_coding	adaptor related protein complex 1 sigma 1 subunit [Source:HGNC Symbol;Acc:HGNC:559]	-	1661	1563	7233	6447	26.6533	27.9098	208.232	140.195
ENSG00000257337	129.109	117.014	780.676	869.217	-2.74485	9.40479e-08	1.14566e-06	AC068888.1	12	53014596	53054438	-	5622	antisense	-	-	169	137	561	833	0.847037	0.764104	5.04459	5.65787
novel.641	25.9745	13.6659	200.387	222.261	-3.41001	9.43263e-08	1.14786e-06	-	CHR_HSCHR6_MHC_MCF_CTG1	32190586	32204678	-	3759	-	PF00170:bZIP transcription factor	bZIP_1	34	16	144	213	0.254867	0.133466	1.93662	2.16375
ENSG00000102996	259.745	232.32	2424.13	1253.22	-2.90133	9.6417e-08	1.1727e-06	MMP15	16	58025566	58046901	+	4419	protein_coding	matrix metallopeptidase 15 [Source:HGNC Symbol;Acc:HGNC:7161]	Hemopexin	340	272	1742	1201	2.16801	1.93005	19.9286	10.3781
novel.239	11.4593	11.1035	176.731	113.739	-3.68412	9.75128e-08	1.18542e-06	-	CHR_HG2072_PATCH	82372206	82381229	+	8731	-	PF13855:Leucine rich repeat|PF01462:Leucine rich repeat N-terminal domain	-	15	13	127	109	0.0484098	0.0466876	0.735349	0.476718
ENSG00000104140	126.053	138.367	1219.02	722.087	-2.87566	9.78597e-08	1.18902e-06	RHOV	15	40872214	40874289	-	1705	protein_coding	ras homolog family member V [Source:HGNC Symbol;Acc:HGNC:18313]	Ras	165	162	876	692	2.72688	2.97929	25.9737	15.4982
ENSG00000125753	670.754	706.354	5851.59	3481.04	-2.76056	9.87495e-08	1.19922e-06	VASP	19	45506579	45526983	+	3601	protein_coding	vasodilator stimulated phosphoprotein [Source:HGNC Symbol;Acc:HGNC:12652]	-	878	827	4205	3336	6.87033	7.2012	59.0332	35.3754
ENSG00000128965	30.5583	26.4776	354.853	197.217	-3.27253	9.98289e-08	1.21108e-06	CHAC1	15	40952962	40956519	+	2058	protein_coding	ChaC glutathione specific gamma-glutamylcyclotransferase 1 [Source:HGNC Symbol;Acc:HGNC:28680]	ChaC	40	31	255	189	0.547673	0.472323	6.26395	3.50683
ENSG00000100078	0	0.854117	186.472	93.913	-8.43327	1.01654e-07	1.23196e-06	PLA2G3	22	31134809	31140607	-	2697	protein_coding	phospholipase A2 group III [Source:HGNC Symbol;Acc:HGNC:17934]	-	0	1	134	90	0	0.0116263	2.51176	1.27427
novel.48	0.763957	0	133.592	132.522	-8.3683	1.01933e-07	1.2347e-06	-	13	23159077	23159900	+	709	-	-	-	1	0	96	127	0.039743	0	6.84508	6.84
ENSG00000185499	70.284	80.287	853.038	415.304	-3.0739	1.02888e-07	1.24563e-06	MUC1	1	155185824	155192916	-	4717	protein_coding	mucin 1, cell surface associated [Source:HGNC Symbol;Acc:HGNC:7508]	-	92	94	613	398	0.549577	0.624863	6.56974	3.22193
ENSG00000160972	343.016	332.251	3964.61	1604.87	-3.04375	1.03641e-07	1.25411e-06	PPP1R16A	8	144477969	144502121	+	5414	protein_coding	protein phosphatase 1 regulatory subunit 16A [Source:HGNC Symbol;Acc:HGNC:14941]	-	449	389	2849	1538	2.33687	2.25296	26.6028	10.8477
ENSG00000233251	1.52791	0	61.2295	117.913	-6.81458	1.04014e-07	1.25733e-06	AC007743.1	2	56173534	56185770	-	3713	antisense	-	RVT_1	2	0	44	113	0.0151779	0	0.599075	1.16212
ENSG00000272622	1.52791	0	82.1032	88.6956	-6.74235	1.04201e-07	1.25894e-06	AC010735.2	2	226800146	226811029	+	584	lincRNA	-	-	2	0	59	85	0.0964992	0	5.10732	5.55783
ENSG00000264491	0	0	82.1032	52.1739	-8.81716	1.04611e-07	1.26325e-06	AC005544.1	17	67019934	67021743	-	460	antisense	-	-	0	0	59	50	0	0	6.48407	4.1506
ENSG00000237172	27.5024	25.6235	308.931	194.087	-3.24129	1.05178e-07	1.2688e-06	B3GNT9	16	67148105	67151214	-	2917	protein_coding	UDP-GlcNAc:betaGal beta-1,3-N-acetylglucosaminyltransferase 9 [Source:HGNC Symbol;Acc:HGNC:28714]	Galactosyl_T	36	30	222	186	0.347754	0.322483	3.84743	2.43487
ENSG00000135686	881.606	897.676	8150.48	4344	-2.81184	1.09599e-07	1.31876e-06	KLHL36	16	84648525	84667686	+	9995	protein_coding	kelch like family member 36 [Source:HGNC Symbol;Acc:HGNC:17844]	BTB	1154	1051	5857	4163	3.25334	3.29718	29.6242	15.9046
novel.136	0	0	72.3621	58.4348	-8.78056	1.12794e-07	1.35583e-06	-	22	49051196	49052425	-	1230	-	-	-	0	0	52	56	0	0	2.13723	1.73853
ENSG00000150893	970.989	931.841	5903.08	5441.74	-2.57579	1.13136e-07	1.35855e-06	FREM2	13	38687129	38887131	+	16223	protein_coding	FRAS1 related extracellular matrix protein 2 [Source:HGNC Symbol;Acc:HGNC:25396]	-	1271	1091	4242	5215	2.2076	2.10871	13.2188	12.275
ENSG00000126603	0	0	65.4042	64.6956	-8.77404	1.13328e-07	1.36016e-06	GLIS2	16	4314761	4339597	+	4469	protein_coding	GLIS family zinc finger 2 [Source:HGNC Symbol;Acc:HGNC:29450]	-	0	0	47	62	0	0	0.531669	0.529761
ENSG00000129521	228.423	240.007	1633.71	1339.83	-2.66619	1.13812e-07	1.36528e-06	EGLN3	14	33924231	34462774	-	7359	protein_coding	egl-9 family hypoxia inducible factor 3 [Source:HGNC Symbol;Acc:HGNC:14661]	-	299	281	1174	1284	1.14488	1.19732	8.06497	6.66262
ENSG00000167916	0	0	96.0189	41.7391	-8.8525	1.16378e-07	1.39535e-06	KRT24	17	40697991	40703750	-	1881	protein_coding	keratin 24 [Source:HGNC Symbol;Acc:HGNC:18527]	Filament	0	0	69	40	0	0	1.85445	0.812026
ENSG00000033327	205.504	171.677	1770.09	984	-2.86765	1.18047e-07	1.41393e-06	GAB2	11	78215297	78418348	-	6771	protein_coding	GRB2 associated binding protein 2 [Source:HGNC Symbol;Acc:HGNC:14458]	PH	269	201	1272	943	1.11945	0.93082	9.49703	5.31811
ENSG00000119686	74.8677	80.287	484.269	619.826	-2.83171	1.20886e-07	1.445e-06	FLVCR2	14	75578617	75663214	+	4913	protein_coding	feline leukemia virus subgroup C cellular receptor family member 2 [Source:HGNC Symbol;Acc:HGNC:20105]	-	98	94	348	594	0.562064	0.599934	3.58085	4.61677
ENSG00000232187	43.5455	41.8517	1262.16	166.956	-4.06371	1.21583e-07	1.45113e-06	FTH1P7	13	22696023	22696574	-	552	processed_pseudogene	ferritin heavy chain 1 pseudogene 7 [Source:HGNC Symbol;Acc:HGNC:3994]	-	57	49	907	160	2.90966	2.78343	83.0657	11.0683
ENSG00000224244	0.763957	0	205.954	78.2608	-8.46077	1.22372e-07	1.45907e-06	AC073508.1	17	40687038	40689360	-	656	unprocessed_pseudogene	-	-	1	0	148	75	0.0429539	0	11.4054	4.36572
ENSG00000197324	1663.13	1611.72	17430.9	7595.48	-2.93389	1.23636e-07	1.47266e-06	LRP10	14	22871613	22881580	+	7112	protein_coding	LDL receptor related protein 10 [Source:HGNC Symbol;Acc:HGNC:14553]	Ldl_recept_a	2177	1887	12526	7279	8.62528	8.31961	89.0378	39.0822
ENSG00000142694	45.8374	25.6235	669.349	203.478	-3.60683	1.24441e-07	1.48149e-06	EVA1B	1	36322031	36324154	-	1211	protein_coding	eva-1 homolog B [Source:HGNC Symbol;Acc:HGNC:25558]	-	60	30	481	195	1.39609	0.776783	20.0796	6.14878
ENSG00000244541	0	0	55.6632	73.0435	-8.76016	1.27204e-07	1.5121e-06	LINC01213	3	150238519	150240209	+	609	lincRNA	long intergenic non-protein coding RNA 1213 [Source:HGNC Symbol;Acc:HGNC:49648]	-	0	0	40	70	0	0	3.32045	4.38914
ENSG00000214756	35.142	38.4352	354.853	256.696	-3.05473	1.29195e-07	1.53191e-06	CSKMT	11	62665309	62668496	+	3185	protein_coding	citrate synthase lysine methyltransferase [Source:HGNC Symbol;Acc:HGNC:33113]	-	46	45	255	246	0.406963	0.443022	4.04748	2.94934
ENSG00000124201	514.143	475.743	3427.46	2672.35	-2.6233	1.31542e-07	1.55817e-06	ZNFX1	20	49237946	49278426	-	9340	protein_coding	zinc finger NFX1-type containing 1 [Source:HGNC Symbol;Acc:HGNC:29271]	-	673	557	2463	2561	2.03037	1.86995	13.3313	10.4704
ENSG00000204118	0	0	82.1032	48	-8.77116	1.36205e-07	1.61018e-06	NAP1L6	X	73126037	73128080	-	2044	transcribed_processed_pseudogene	nucleosome assembly protein 1 like 6 [Source:HGNC Symbol;Acc:HGNC:31706]	-	0	0	59	46	0	0	1.45923	0.859361
ENSG00000275234	3.05583	1.70823	36.181	158.609	-5.34681	1.37391e-07	1.62339e-06	AC010503.4	19	6469465	6470152	+	688	antisense	-	-	4	2	26	152	0.163824	0.0911516	1.91046	8.43634
ENSG00000169247	2.29187	0.854117	75.1453	72	-5.52349	1.38182e-07	1.63191e-06	SH3TC2	5	148923639	149063163	-	15165	protein_coding	SH3 domain and tetratricopeptide repeats 2 [Source:HGNC Symbol;Acc:HGNC:29427]	SH3_1	3	1	54	69	0.00557423	0.00206766	0.180013	0.173742
novel.98	9.16748	16.2282	178.122	131.478	-3.61215	1.3863e-07	1.63639e-06	-	19	47235277	47244314	-	4388	-	-	-	12	19	128	126	0.0770586	0.135772	1.47468	1.09649
ENSG00000141337	71.8119	87.974	615.078	510.261	-2.81642	1.39139e-07	1.64157e-06	ARSG	17	68259182	68422731	+	6587	protein_coding	arylsulfatase G [Source:HGNC Symbol;Acc:HGNC:24102]	Sulfatase	94	103	442	489	0.402112	0.490312	3.39225	2.83478
ENSG00000161921	139.04	143.492	1401.32	723.13	-2.91013	1.39967e-07	1.64887e-06	CXCL16	17	4733526	4739922	-	2794	protein_coding	C-X-C motif chemokine ligand 16 [Source:HGNC Symbol;Acc:HGNC:16642]	-	182	168	1007	693	1.83549	1.88541	18.2204	9.47121
ENSG00000264049	19.8629	9.39528	485.661	81.3913	-4.26976	1.41593e-07	1.6672e-06	MIR4737	17	60043025	60043105	-	81	miRNA	microRNA 4737 [Source:HGNC Symbol;Acc:HGNC:41669]	-	26	11	349	78	9.04471	4.25824	217.818	36.7713
ENSG00000120738	158.139	146.054	1404.1	790.956	-2.85062	1.42574e-07	1.67624e-06	EGR1	5	138465490	138469315	+	3138	protein_coding	early growth response 1 [Source:HGNC Symbol;Acc:HGNC:3238]	-	207	171	1009	758	1.85876	1.7087	16.2552	9.22391
ENSG00000158220	9.16748	2.56235	143.333	87.6521	-4.28139	1.45244e-07	1.70677e-06	ESYT3	3	138434586	138481686	+	9816	protein_coding	extended synaptotagmin 3 [Source:HGNC Symbol;Acc:HGNC:24295]	C2	12	3	103	84	0.0344471	0.00958317	0.530465	0.326771
ENSG00000184260	39.7257	40.1435	404.949	258.783	-3.05386	1.47346e-07	1.72976e-06	HIST2H2AC	1	149886975	149887364	+	390	protein_coding	histone cluster 2 H2A family member c [Source:HGNC Symbol;Acc:HGNC:4738]	Histone	52	47	291	248	3.75703	3.77882	37.7209	24.2821
ENSG00000124343	1.52791	1.70823	66.7958	77.2174	-5.4796	1.50531e-07	1.7654e-06	XG	X	2752048	2816500	+	3349	protein_coding	Xg blood group [Source:HGNC Symbol;Acc:HGNC:12806]	-	2	2	48	74	0.0168276	0.0187257	0.724569	0.843753
ENSG00000184194	0	1.70823	125.242	52.1739	-6.75793	1.54217e-07	1.80682e-06	GPR173	X	53049091	53080615	+	4608	protein_coding	G protein-coupled receptor 173 [Source:HGNC Symbol;Acc:HGNC:18186]	7tm_1	0	2	90	50	0	0.0136094	0.987379	0.41434
ENSG00000180938	9.16748	11.9576	86.2779	225.391	-3.88883	1.57085e-07	1.83769e-06	ZNF572	8	124973298	124979389	+	3275	protein_coding	zinc finger protein 572 [Source:HGNC Symbol;Acc:HGNC:26758]	zf-C2H2	12	14	62	216	0.103247	0.134042	0.957049	2.5185
ENSG00000197937	0.763957	0	70.9705	204.522	-8.42227	1.57481e-07	1.8405e-06	ZNF347	19	53124072	53159075	-	9131	protein_coding	zinc finger protein 347 [Source:HGNC Symbol;Acc:HGNC:16447]	-	1	0	51	196	0.00308594	0	0.282362	0.819665
ENSG00000248383	0	0	70.9705	53.2174	-8.7053	1.64753e-07	1.92168e-06	PCDHAC1	5	140926369	141012344	+	6943	protein_coding	protocadherin alpha subfamily C, 1 [Source:HGNC Symbol;Acc:HGNC:8676]	Cadherin	0	0	51	51	0	0	0.371344	0.280493
ENSG00000266970	4.58374	1.70823	108.543	63.6522	-4.75367	1.65993e-07	1.93519e-06	AC061992.1	17	78360453	78373911	+	1188	lincRNA	-	-	6	2	78	61	0.142312	0.0527881	3.31919	1.9607
ENSG00000184261	18.335	27.3317	343.72	154.435	-3.44791	1.67795e-07	1.95376e-06	KCNK12	2	47516581	47570939	-	6685	protein_coding	potassium two pore domain channel subfamily K member 12 [Source:HGNC Symbol;Acc:HGNC:6274]	Ion_trans_2	24	32	247	148	0.101162	0.150097	1.86788	0.845394
ENSG00000160180	0	0	1636.5	322.435	-12.6863	1.67834e-07	1.95376e-06	TFF3	21	42311667	42315651	-	1168	protein_coding	trefoil factor 3 [Source:HGNC Symbol;Acc:HGNC:11757]	-	0	0	1176	309	0	0	50.9	10.1022
ENSG00000018280	1.52791	5.1247	93.2358	77.2174	-4.69971	1.69615e-07	1.97352e-06	SLC11A1	2	218382029	218396894	+	8676	protein_coding	solute carrier family 11 member 1 [Source:HGNC Symbol;Acc:HGNC:10907]	-	2	6	67	74	0.00649556	0.0216847	0.390399	0.325695
ENSG00000261776	0	0.854117	147.507	101.217	-8.26141	1.69809e-07	1.9748e-06	AC079414.2	16	78055824	78056927	-	1104	processed_pseudogene	-	-	0	1	106	97	0	0.0284023	4.8539	3.35507
ENSG00000086548	0.763957	0	83.4947	174.261	-8.32546	1.72157e-07	2.00047e-06	CEACAM6	19	41750977	41772208	+	3052	protein_coding	carcinoembryonic antigen related cell adhesion molecule 6 [Source:HGNC Symbol;Acc:HGNC:1818]	V-set	1	0	60	167	0.00923255	0	0.993849	2.08944
ENSG00000231345	30.5583	33.3105	438.347	190.956	-3.29927	1.72185e-07	2.00047e-06	BEND3P1	10	50655967	50660472	+	2966	transcribed_processed_pseudogene	BEN domain containing 3 pseudogene 1 [Source:HGNC Symbol;Acc:HGNC:45014]	-	40	39	315	183	0.38001	0.412303	5.369	2.35602
ENSG00000103642	340.725	327.127	1714.43	2538.78	-2.6711	1.7437e-07	2.02286e-06	LACTB	15	63121800	63142061	+	3972	protein_coding	lactamase beta [Source:HGNC Symbol;Acc:HGNC:16468]	Beta-lactamase	446	383	1232	2433	3.16397	3.02351	15.6803	23.3901
ENSG00000124243	225.367	187.906	2092.93	1012.17	-2.90891	1.74681e-07	2.02548e-06	BCAS4	20	50794894	50882676	+	7583	protein_coding	breast carcinoma amplified sequence 4 [Source:HGNC Symbol;Acc:HGNC:14367]	-	295	220	1504	970	1.09619	0.909713	10.0268	4.88461
novel.86	0	0	70.9705	52.1739	-8.69301	1.75773e-07	2.03614e-06	-	17	66961955	66962799	-	845	-	-	-	0	0	51	50	0	0	3.05118	2.2595
ENSG00000261812	2.29187	0	105.76	53.2174	-6.05819	1.83401e-07	2.12034e-06	TUBB8P7	16	90093154	90096354	+	2466	transcribed_unprocessed_pseudogene	tubulin beta 8 class VIII pseudogene 7 [Source:HGNC Symbol;Acc:HGNC:42345]	Tubulin_C	3	0	76	51	0.0342795	0	1.55802	0.789725
novel.54	0	0	62.621	58.4348	-8.66974	1.86244e-07	2.15216e-06	-	14	83638943	83639818	+	659	-	-	-	0	0	45	56	0	0	3.45208	3.2449
ENSG00000269981	2.29187	0	65.4042	85.5652	-5.98765	1.89808e-07	2.19227e-06	AL627309.7	1	137682	137965	-	284	processed_pseudogene	-	-	3	0	47	82	0.297652	0	8.3663	11.0254
ENSG00000104866	587.483	568.842	6007.45	2640	-2.90256	1.90815e-07	2.20282e-06	PPP1R37	19	45091396	45148077	+	7823	protein_coding	protein phosphatase 1 regulatory subunit 37 [Source:HGNC Symbol;Acc:HGNC:27607]	-	769	666	4317	2530	2.76987	2.66946	27.8973	12.3494
ENSG00000131788	1479.02	1411	8526.2	8042.08	-2.51926	1.91519e-07	2.20987e-06	PIAS3	1	145848522	145859836	-	4805	protein_coding	protein inhibitor of activated STAT 3 [Source:HGNC Symbol;Acc:HGNC:16861]	zf-MIZ	1936	1652	6127	7707	11.3532	10.7805	64.4627	61.2478
ENSG00000215915	2.29187	4.27058	84.8863	76.1739	-4.62876	1.92007e-07	2.21442e-06	ATAD3C	1	1449689	1470158	+	3976	protein_coding	ATPase family, AAA domain containing 3C [Source:HGNC Symbol;Acc:HGNC:32151]	AAA	3	5	61	73	0.0212609	0.0394318	0.775599	0.701092
ENSG00000133424	511.851	462.931	4337.55	2331.13	-2.77403	1.92383e-07	2.21766e-06	LARGE1	22	33162226	33922841	-	10687	protein_coding	LARGE xylosyl- and glucuronyltransferase 1 [Source:HGNC Symbol;Acc:HGNC:6511]	Glyco_transf_8	670	542	3117	2234	1.76655	1.59025	14.7447	7.98227
ENSG00000258498	0.763957	1.70823	102.977	49.0435	-5.96001	1.9282e-07	2.22063e-06	DIO3OS	14	101552221	101560431	-	5603	lincRNA	DIO3 opposite strand/antisense RNA (head to head) [Source:HGNC Symbol;Acc:HGNC:20348]	-	1	2	74	47	0.00502905	0.0111926	0.667675	0.320314
ENSG00000132256	16.807	18.7906	143.333	222.261	-3.36295	1.92828e-07	2.22063e-06	TRIM5	11	5663557	5938619	-	4804	protein_coding	tripartite motif containing 5 [Source:HGNC Symbol;Acc:HGNC:16276]	zf-B_box	22	22	103	213	0.129041	0.143596	1.0839	1.69307
ENSG00000270168	0.763957	0	150.291	94.9565	-8.24884	1.93434e-07	2.22652e-06	AC004233.2	16	2988256	3002016	+	2062	protein_coding	-	-	1	0	108	91	0.0136653	0	2.64782	1.6852
ENSG00000099219	693.673	761.018	3680.73	5218.43	-2.61307	1.94929e-07	2.24154e-06	ERMP1	9	5765076	5833117	-	6528	protein_coding	endoplasmic reticulum metallopeptidase 1 [Source:HGNC Symbol;Acc:HGNC:23703]	-	908	891	2645	5001	3.91933	4.27977	20.4833	29.2533
ENSG00000246575	6.11165	11.9576	222.653	77.2174	-4.05652	2.01235e-07	2.30619e-06	AC093162.2	2	85315041	85316529	+	704	unprocessed_pseudogene	-	-	8	14	160	74	0.320202	0.62356	11.4895	4.01382
ENSG00000004848	1.52791	4.27058	112.718	56.3478	-4.88172	2.01787e-07	2.3114e-06	ARX	X	25003694	25016420	-	3097	protein_coding	aristaless related homeobox [Source:HGNC Symbol;Acc:HGNC:18060]	Homeobox	2	5	81	54	0.0181968	0.0506234	1.3222	0.665812
ENSG00000150457	347.6	320.294	2418.56	1730.09	-2.63472	2.0446e-07	2.33748e-06	LATS2	13	20973032	21061547	-	5578	protein_coding	large tumor suppressor kinase 2 [Source:HGNC Symbol;Acc:HGNC:6515]	Pkinase	455	375	1738	1658	2.29847	2.10802	15.7516	11.3502
ENSG00000141527	42.0176	48.6846	610.903	244.174	-3.23598	2.05146e-07	2.34418e-06	CARD14	17	80169992	80209331	+	8208	protein_coding	caspase recruitment domain family member 14 [Source:HGNC Symbol;Acc:HGNC:16446]	CARD	55	57	439	234	0.188813	0.217751	2.70384	1.08862
ENSG00000104856	53.477	58.0799	757.019	284.869	-3.22238	2.06044e-07	2.35132e-06	RELB	19	45001430	45038198	+	3035	protein_coding	RELB proto-oncogene, NF-kB subunit [Source:HGNC Symbol;Acc:HGNC:9956]	RHD	70	68	544	273	0.649899	0.702543	9.06137	3.43481
ENSG00000064601	1362.13	1316.19	14394.5	5939.48	-2.92441	2.06069e-07	2.35132e-06	CTSA	20	45890144	45898820	+	5856	protein_coding	cathepsin A [Source:HGNC Symbol;Acc:HGNC:9251]	Peptidase_S10	1783	1541	10344	5692	8.5794	8.25133	89.2979	37.1161
ENSG00000167232	32.8501	32.4564	155.857	673.043	-3.6675	2.06506e-07	2.35516e-06	ZNF91	19	23304991	23395560	-	10397	protein_coding	zinc finger protein 91 [Source:HGNC Symbol;Acc:HGNC:13166]	KRAB	43	38	112	645	0.116538	0.114604	0.544583	2.36892
ENSG00000256417	0	0	50.0968	69.913	-8.65963	2.09268e-07	2.38436e-06	AC006206.2	12	5290480	5383653	+	1604	lincRNA	-	-	0	0	36	67	0	0	1.13462	1.59503
ENSG00000224520	3.81978	8.54117	232.394	51.1304	-4.52537	2.10011e-07	2.39168e-06	KRT8P45	1	157073257	157074703	+	1447	processed_pseudogene	keratin 8 pseudogene 45 [Source:HGNC Symbol;Acc:HGNC:39879]	Filament	5	10	167	49	0.0973661	0.216698	5.83447	1.29308
ENSG00000169093	403.369	373.249	5146.06	1669.56	-3.13332	2.12187e-07	2.41413e-06	ASMTL	X	1403139	1453762	-	3506	protein_coding	acetylserotonin O-methyltransferase like [Source:HGNC Symbol;Acc:HGNC:751]	Maf	528	437	3698	1600	4.24354	3.90834	53.3223	17.4264
ENSG00000231419	1.52791	0.854117	77.9284	63.6522	-5.87596	2.13044e-07	2.42271e-06	LINC00689	7	159006522	159030195	+	9158	processed_transcript	long intergenic non-protein coding RNA 689 [Source:HGNC Symbol;Acc:HGNC:27217]	-	2	1	56	61	0.00615369	0.00342391	0.30913	0.254348
ENSG00000106526	31.3222	29.04	247.701	247.304	-3.03526	2.18066e-07	2.47505e-06	ACTR3C	7	150243916	150323725	-	6460	protein_coding	ARP3 actin related protein 3 homolog C [Source:HGNC Symbol;Acc:HGNC:37282]	Actin	41	34	178	237	0.178837	0.165032	1.39297	1.40092
ENSG00000117394	1546.25	1449.44	16166	6601.04	-2.92592	2.19485e-07	2.48876e-06	SLC2A1	1	42925375	42959176	-	4724	protein_coding	solute carrier family 2 member 1 [Source:HGNC Symbol;Acc:HGNC:11005]	Sugar_tr	2024	1697	11617	6326	12.0728	11.264	124.319	51.135
ENSG00000257671	0	0	44.5305	76.1739	-8.66902	2.21637e-07	2.51076e-06	KRT7-AS	12	52245048	52247448	-	1693	antisense	KRT7 antisense RNA 1 [Source:HGNC Symbol;Acc:HGNC:52643]	-	0	0	32	73	0	0	0.955535	1.64651
ENSG00000125898	149.735	176.802	1803.49	774.261	-2.9805	2.23808e-07	2.53292e-06	FAM110A	20	833715	857463	+	2722	protein_coding	family with sequence similarity 110 member A [Source:HGNC Symbol;Acc:HGNC:16188]	-	196	207	1296	742	2.02896	2.38454	24.0697	10.4091
ENSG00000143418	2315.55	2354.8	16106.1	11561.7	-2.56659	2.26794e-07	2.56302e-06	CERS2	1	150960583	150975004	-	4644	protein_coding	ceramide synthase 2 [Source:HGNC Symbol;Acc:HGNC:14076]	LAG1	3031	2757	11574	11080	18.3908	18.6152	125.993	91.1059
ENSG00000160796	1918.29	1848.31	24365.2	7880.35	-3.09771	2.28699e-07	2.58208e-06	NBEAL2	3	46979683	47009703	+	9819	protein_coding	neurobeachin like 2 [Source:HGNC Symbol;Acc:HGNC:31928]	Beach	2511	2164	17509	7552	7.20586	6.91055	90.1463	29.3693
ENSG00000112562	8.40352	9.39528	171.164	84.5217	-3.84288	2.2919e-07	2.58639e-06	SMOC2	6	168441151	168673445	+	4032	protein_coding	SPARC related modular calcium binding 2 [Source:HGNC Symbol;Acc:HGNC:20323]	-	11	11	123	81	0.0768738	0.085545	1.54219	0.76712
ENSG00000172824	1.52791	0.854117	82.1032	59.4782	-5.87532	2.30271e-07	2.59734e-06	CES4A	16	66988589	67009758	+	4340	protein_coding	carboxylesterase 4A [Source:HGNC Symbol;Acc:HGNC:26741]	COesterase	2	1	59	57	0.0129851	0.00722492	0.687252	0.501515
novel.697	0	0	73.7537	45.913	-8.65074	2.30712e-07	2.60063e-06	-	CHR_HSCHR7_3_CTG4_4	144449792	144475558	+	6035	-	PF00621:RhoGEF domain|PF15441:Rho guanine nucleotide exchange factor 5/35|PF14604:Variant SH3 domain	RhoGEF	0	0	53	44	0	0	0.443969	0.278403
ENSG00000177839	0	0	68.1874	50.0869	-8.63476	2.31185e-07	2.60392e-06	PCDHB9	5	141187127	141191541	+	4415	protein_coding	protocadherin beta 9 [Source:HGNC Symbol;Acc:HGNC:8694]	Cadherin	0	0	49	48	0	0	0.561073	0.415154
ENSG00000203288	9.16748	5.97882	140.549	87.6521	-3.90542	2.31332e-07	2.60433e-06	TDRKH-AS1	1	151790804	151794402	+	1141	antisense	TDRKH antisense RNA 1 [Source:HGNC Symbol;Acc:HGNC:40578]	-	12	7	101	84	0.296348	0.192369	4.47496	2.8112
ENSG00000169136	643.251	603.86	3899.2	3342.26	-2.53762	2.31684e-07	2.60705e-06	ATF5	19	49928702	49933935	+	2954	protein_coding	activating transcription factor 5 [Source:HGNC Symbol;Acc:HGNC:790]	bZIP_1	842	707	2802	3203	8.03171	7.50467	47.9525	41.4043
ENSG00000271824	7.63957	1.70823	146.116	68.8695	-4.50101	2.32623e-07	2.61637e-06	SMIM32	5	136191468	136193134	-	1667	protein_coding	small integral membrane protein 32 [Source:HGNC Symbol;Acc:HGNC:53640]	-	10	2	105	66	0.169033	0.0376198	3.18425	1.51184
ENSG00000276223	0	1.70823	64.0126	93.913	-6.59666	2.3389e-07	2.62937e-06	AL118522.1	20	44746642	44747201	+	560	sense_intronic	-	-	0	2	46	90	0	0.111986	4.15263	6.13696
ENSG00000143546	0	3.41647	47.3137	123.13	-5.69318	2.36714e-07	2.65901e-06	S100A8	1	153390032	153391188	-	1006	protein_coding	S100 calcium binding protein A8 [Source:HGNC Symbol;Acc:HGNC:10498]	-	0	4	34	118	0	0.124676	1.70858	4.47902
ENSG00000108604	3200.98	3246.5	20645.5	16420.2	-2.52326	2.36752e-07	2.65901e-06	SMARCD2	17	63832081	63843065	-	3734	protein_coding	SWI/SNF related, matrix associated, actin dependent regulator of chromatin, subfamily d, member 2 [Source:HGNC Symbol;Acc:HGNC:11107]	-	4190	3801	14836	15736	31.6189	31.9188	200.861	160.923
ENSG00000112041	3.05583	0.854117	112.718	46.9565	-5.32186	2.38182e-07	2.6738e-06	TULP1	6	35497874	35512938	-	2958	protein_coding	tubby like protein 1 [Source:HGNC Symbol;Acc:HGNC:12423]	Tub	4	1	81	45	0.0381038	0.0106005	1.38433	0.580916
ENSG00000101187	338.433	372.395	4312.5	1553.74	-3.04467	2.38959e-07	2.68059e-06	SLCO4A1	20	62642445	62685785	+	4051	protein_coding	solute carrier organic anion transporter family member 4A1 [Source:HGNC Symbol;Acc:HGNC:10953]	-	443	436	3099	1489	3.0814	3.37479	38.6735	14.0356
ENSG00000003436	224.603	181.927	897.568	2703.65	-3.14726	2.39014e-07	2.68059e-06	TFPI	2	187464230	187565760	-	11714	protein_coding	tissue factor pathway inhibitor [Source:HGNC Symbol;Acc:HGNC:11760]	Kunitz_BPTI	294	213	645	2591	0.70721	0.57016	2.78361	8.44619
ENSG00000153064	0.763957	0.854117	50.0968	110.609	-6.64136	2.39194e-07	2.68134e-06	BANK1	4	101411286	102074812	+	6144	protein_coding	B cell scaffold protein with ankyrin repeats 1 [Source:HGNC Symbol;Acc:HGNC:18233]	-	1	1	36	106	0.00458622	0.00510354	0.296214	0.6588
ENSG00000175315	0	0	80.7116	40.6956	-8.67058	2.39669e-07	2.68538e-06	CST6	11	66011841	66013505	+	759	protein_coding	cystatin E/M [Source:HGNC Symbol;Acc:HGNC:2478]	-	0	0	58	39	0	0	3.86314	1.9621
ENSG00000173093	1.52791	0	100.194	59.4782	-6.64314	2.4662e-07	2.76065e-06	CCDC63	12	110846769	110907535	+	2184	protein_coding	coiled-coil domain containing 63 [Source:HGNC Symbol;Acc:HGNC:26669]	-	2	0	72	57	0.0258038	0	1.66661	0.9966
ENSG00000226330	0.763957	0.854117	112.718	49.0435	-6.64288	2.46841e-07	2.76182e-06	AL606489.1	1	204377850	204435846	+	486	antisense	-	-	1	1	81	47	0.0579789	0.0645188	8.42563	3.69284
ENSG00000100711	704.368	749.06	7248.73	3259.83	-2.85393	2.50633e-07	2.80291e-06	ZFYVE21	14	103715730	103733668	+	8390	protein_coding	zinc finger FYVE-type containing 21 [Source:HGNC Symbol;Acc:HGNC:20760]	FYVE	922	877	5209	3124	3.09653	3.27763	31.3867	14.2183
ENSG00000266903	2.29187	5.1247	87.6695	78.2608	-4.49754	2.51444e-07	2.81065e-06	AC243964.2	19	44632199	44718759	-	1418	antisense	-	-	3	6	63	75	0.0596144	0.132678	2.24604	2.01969
ENSG00000144655	147.444	169.969	1362.36	805.565	-2.77165	2.52645e-07	2.8214e-06	CSRNP1	3	39141855	39154562	-	3214	protein_coding	cysteine and serine rich nuclear protein 1 [Source:HGNC Symbol;Acc:HGNC:14300]	-	193	199	979	772	1.69207	1.94147	15.3989	9.17213
ENSG00000076864	212.38	187.906	1981.61	949.565	-2.87184	2.53907e-07	2.83416e-06	RAP1GAP	1	21596215	21669363	-	5755	protein_coding	RAP1 GTPase activating protein [Source:HGNC Symbol;Acc:HGNC:9858]	-	278	220	1424	910	1.36115	1.19867	12.5089	6.03802
ENSG00000228314	0	0	62.621	53.2174	-8.60559	2.54961e-07	2.84457e-06	CYP4F29P	21	13843133	13848364	-	1717	transcribed_unprocessed_pseudogene	cytochrome P450 family 4 subfamily F member 29, pseudogene [Source:HGNC Symbol;Acc:HGNC:2647]	-	0	0	45	51	0	0	1.32494	1.13422
ENSG00000249846	14.5152	13.6659	166.989	133.565	-3.41324	2.56847e-07	2.86427e-06	LINC02021	3	130112550	130120579	+	1974	lincRNA	long intergenic non-protein coding RNA 2021 [Source:HGNC Symbol;Acc:HGNC:52856]	-	19	16	120	128	0.271214	0.254153	3.07318	2.47606
ENSG00000196872	40.4897	53.8093	364.594	336	-2.89429	2.60715e-07	2.90516e-06	KIAA1211L	2	98793846	98936259	-	4705	protein_coding	KIAA1211 like [Source:HGNC Symbol;Acc:HGNC:33454]	-	53	63	262	322	0.317412	0.419859	2.81511	2.61333
ENSG00000258947	3.81978	7.68705	143.333	68.8695	-4.21155	2.65839e-07	2.96034e-06	TUBB3	16	89921392	89938761	+	4430	protein_coding	tubulin beta 3 class III [Source:HGNC Symbol;Acc:HGNC:20772]	Tubulin	5	9	103	66	0.0318033	0.0637032	1.1754	0.568904
ENSG00000128567	615.749	600.444	4262.41	3018.78	-2.58169	2.70955e-07	3.01163e-06	PODXL	7	131500262	131558217	-	6874	protein_coding	podocalyxin like [Source:HGNC Symbol;Acc:HGNC:9171]	-	806	703	3063	2893	3.30394	3.20677	22.5264	16.0708
ENSG00000230126	0	0	77.9284	40.6956	-8.63724	2.72824e-07	3.03098e-06	FGF12-AS2	3	192515022	192516573	+	580	antisense	FGF12 antisense RNA 2 [Source:HGNC Symbol;Acc:HGNC:40235]	-	0	0	56	39	0	0	4.88106	2.56765
ENSG00000273270	127.581	146.054	701.356	1164.52	-2.77024	2.75059e-07	3.05345e-06	AC090114.2	7	128524016	128531069	-	7054	lincRNA	-	-	167	171	504	1116	0.667095	0.760122	3.61201	6.04126
ENSG00000133477	0.763957	2.56235	97.4105	50.0869	-5.49465	2.75106e-07	3.05345e-06	FAM83F	22	39994949	40043529	+	16389	protein_coding	family with sequence similarity 83 member F [Source:HGNC Symbol;Acc:HGNC:25148]	-	1	3	70	48	0.00171931	0.00573973	0.215923	0.111838
ENSG00000229391	0	0	79.32	39.6522	-8.64128	2.75961e-07	3.06151e-06	HLA-DRB6	6	32552713	32560022	-	1326	transcribed_unprocessed_pseudogene	major histocompatibility complex, class II, DR beta 6 (pseudogene) [Source:HGNC Symbol;Acc:HGNC:4954]	-	0	0	57	38	0	0	2.17313	1.09431
ENSG00000153234	72.5759	63.2046	480.095	443.478	-2.76533	2.76773e-07	3.06907e-06	NR4A2	2	156324432	156342348	-	3967	protein_coding	nuclear receptor subfamily 4 group A member 2 [Source:HGNC Symbol;Acc:HGNC:7981]	zf-C4	95	74	345	425	0.674789	0.584914	4.39654	4.09096
ENSG00000225362	2.29187	2.56235	72.3621	70.9565	-4.88624	2.77831e-07	3.07936e-06	CT62	15	71110244	71115494	-	2849	protein_coding	cancer/testis antigen 62 [Source:HGNC Symbol;Acc:HGNC:27286]	-	3	3	52	68	0.0296712	0.033018	0.922709	0.911413
ENSG00000074964	155.083	176.802	2246.01	721.043	-3.15993	2.78448e-07	3.08475e-06	ARHGEF10L	1	17539835	17697874	+	7817	protein_coding	Rho guanine nucleotide exchange factor 10 like [Source:HGNC Symbol;Acc:HGNC:25540]	RhoGEF	203	207	1614	691	0.731749	0.830334	10.438	3.37549
ENSG00000242960	36.6699	24.7694	925.4	115.826	-4.08039	2.8037e-07	3.10168e-06	FTH1P23	3	72929044	72929593	+	550	processed_pseudogene	ferritin heavy chain 1 pseudogene 23 [Source:HGNC Symbol;Acc:HGNC:37641]	-	48	29	665	111	2.45915	1.65332	61.1241	7.70653
ENSG00000159173	0	0	65.4042	49.0435	-8.58741	2.86651e-07	3.16819e-06	TNNI1	1	201403768	201429866	-	7524	protein_coding	troponin I1, slow skeletal type [Source:HGNC Symbol;Acc:HGNC:11945]	-	0	0	47	47	0	0	0.315793	0.238533
ENSG00000121858	0	5.97882	91.8442	93.913	-4.99596	2.92986e-07	3.23367e-06	TNFSF10	3	172505508	172523507	-	3473	protein_coding	TNF superfamily member 10 [Source:HGNC Symbol;Acc:HGNC:11925]	-	0	7	66	90	0	0.0631998	0.960711	0.989547
ENSG00000113532	87.855	76.0164	385.467	1066.43	-3.14791	2.93271e-07	3.2353e-06	ST8SIA4	5	100806935	100903266	-	7794	protein_coding	ST8 alpha-N-acetyl-neuraminide alpha-2,8-sialyltransferase 4 [Source:HGNC Symbol;Acc:HGNC:10871]	Glyco_transf_29	115	89	277	1022	0.415761	0.358057	1.79669	5.00714
ENSG00000205220	15.2791	21.3529	318.672	116.87	-3.57146	2.95123e-07	3.25421e-06	PSMB10	16	67934502	67937087	-	1853	protein_coding	proteasome subunit beta 10 [Source:HGNC Symbol;Acc:HGNC:9538]	Proteasome	20	25	229	112	0.304131	0.423046	6.24761	2.30803
ENSG00000163993	0	5.1247	2745.59	1310.61	-9.64223	2.97341e-07	3.27713e-06	S100P	4	6693069	6697170	+	1280	protein_coding	S100 calcium binding protein P [Source:HGNC Symbol;Acc:HGNC:10504]	-	0	6	1973	1256	0	0.146982	77.9239	37.4696
ENSG00000268362	17.571	15.3741	183.688	145.043	-3.31659	2.97512e-07	3.27749e-06	AC092279.1	19	24033445	24066909	+	2191	lincRNA	-	-	23	18	132	139	0.295796	0.257604	3.04569	2.42254
ENSG00000115109	929.735	928.425	4286.06	7622.61	-2.68016	2.98465e-07	3.28546e-06	EPB41L5	2	120013005	120179119	+	9281	protein_coding	erythrocyte membrane protein band 4.1 like 5 [Source:HGNC Symbol;Acc:HGNC:19819]	Band_41	1217	1087	3080	7305	3.6949	3.67246	16.7768	30.0555
ENSG00000163545	58.0607	46.9764	680.482	269.217	-3.1746	3.02637e-07	3.32774e-06	NUAK2	1	205302059	205321791	-	3441	protein_coding	NUAK family kinase 2 [Source:HGNC Symbol;Acc:HGNC:29558]	Pkinase	76	55	489	258	0.622351	0.501188	7.18419	2.86308
ENSG00000123992	980.92	985.65	11992.6	4089.39	-3.0316	3.03249e-07	3.33291e-06	DNPEP	2	219373527	219400022	-	4753	protein_coding	aspartyl aminopeptidase [Source:HGNC Symbol;Acc:HGNC:2981]	Peptidase_M18	1284	1154	8618	3919	7.61208	7.61308	91.6626	31.4852
ENSG00000172183	45.0734	49.5388	624.819	243.13	-3.19643	3.06109e-07	3.36122e-06	ISG20	15	88636153	88656483	+	7363	protein_coding	interferon stimulated exonuclease gene 20 [Source:HGNC Symbol;Acc:HGNC:6130]	Exonuc_X-T	59	58	449	233	0.225789	0.246999	3.0828	1.20837
ENSG00000205018	1.52791	0	134.983	39.6522	-6.77247	3.10328e-07	3.4028e-06	AC092384.1	16	88939789	88951524	+	1812	antisense	-	-	2	0	97	38	0.0311013	0	2.70625	0.8008
novel.729	41.2537	38.4352	190.646	669.913	-3.43413	3.13974e-07	3.44118e-06	-	KI270742.1	1	109991	-	11660	-	-	-	54	45	137	642	0.130497	0.121014	0.593985	2.1025
ENSG00000165474	18.335	14.52	162.815	161.739	-3.30217	3.14535e-07	3.44572e-06	GJB2	13	20187463	20193010	-	2546	protein_coding	gap junction protein beta 2 [Source:HGNC Symbol;Acc:HGNC:4284]	Connexin	24	17	117	155	0.265619	0.209369	2.32317	2.32473
ENSG00000197696	197.865	210.113	2180.6	922.435	-2.92676	3.16784e-07	3.46876e-06	NMB	15	84655129	84658563	-	1022	protein_coding	neuromedin B [Source:HGNC Symbol;Acc:HGNC:7842]	Bombesin	259	246	1567	884	7.14094	7.54756	77.5125	33.0294
ENSG00000244564	0	0	48.7053	63.6522	-8.56423	3.19516e-07	3.49705e-06	AC096888.1	3	64445231	64454832	+	565	lincRNA	-	-	0	0	35	61	0	0	3.13165	4.12269
ENSG00000140044	134.456	139.221	1058.99	712.695	-2.69422	3.27149e-07	3.57727e-06	JDP2	14	75427716	75474111	+	6235	protein_coding	Jun dimerization protein 2 [Source:HGNC Symbol;Acc:HGNC:17546]	bZIP_1	176	163	761	683	0.795395	0.819735	6.17024	4.18295
ENSG00000258484	3.05583	3.41647	25.0484	208.696	-5.18081	3.29368e-07	3.59987e-06	SPESP1	15	68818221	68946811	+	1588	protein_coding	sperm equatorial segment protein 1 [Source:HGNC Symbol;Acc:HGNC:15570]	-	4	4	18	200	0.0709767	0.0789827	0.573028	4.80926
ENSG00000183850	0	0	26.44	99.1304	-8.72853	3.31507e-07	3.62157e-06	ZNF730	19	23075210	23147219	+	3291	protein_coding	zinc finger protein 730 [Source:HGNC Symbol;Acc:HGNC:32470]	-	0	0	19	95	0	0	0.291863	1.10229
ENSG00000177943	207.032	239.153	2517.37	988.174	-2.97366	3.36848e-07	3.67481e-06	MAMDC4	9	136850943	136860799	+	5469	protein_coding	MAM domain containing 4 [Source:HGNC Symbol;Acc:HGNC:24083]	-	271	280	1809	947	1.39626	1.60536	16.7219	6.61212
ENSG00000167930	579.843	604.715	8519.25	2339.48	-3.19631	3.38489e-07	3.6902e-06	FAM234A	16	234546	268971	+	4699	protein_coding	family with sequence similarity 234 member A [Source:HGNC Symbol;Acc:HGNC:14163]	-	759	708	6122	2242	4.55138	4.72444	65.863	18.2192
ENSG00000179546	6.87561	7.68705	129.417	83.4782	-3.86907	3.38571e-07	3.6902e-06	HTR1D	1	23191895	23194729	-	2835	protein_coding	5-hydroxytryptamine receptor 1D [Source:HGNC Symbol;Acc:HGNC:5289]	7tm_1	9	9	93	80	0.0894532	0.0995433	1.65838	1.07755
ENSG00000196511	15.2791	23.9153	171.164	200.348	-3.24873	3.48075e-07	3.79029e-06	TPK1	7	144451941	144836395	-	8442	protein_coding	thiamin pyrophosphokinase 1 [Source:HGNC Symbol;Acc:HGNC:17358]	-	20	28	123	192	0.0667561	0.104	0.736569	0.86847
ENSG00000272468	5.3477	1.70823	66.7958	101.217	-4.55678	3.51014e-07	3.81877e-06	AL021807.1	6	27122657	27123221	-	565	lincRNA	-	-	7	2	48	97	0.349105	0.110995	4.29484	6.55575
ENSG00000143554	8.40352	4.27058	197.604	55.3043	-4.30648	3.55248e-07	3.8595e-06	SLC27A3	1	153774354	153780157	+	5470	protein_coding	solute carrier family 27 member 3 [Source:HGNC Symbol;Acc:HGNC:10997]	AMP-binding	11	5	142	53	0.0566646	0.0286619	1.31237	0.369988
ENSG00000127129	0.763957	0	168.381	66.7826	-8.18731	3.55816e-07	3.86212e-06	EDN2	1	41478775	41484673	-	1639	protein_coding	endothelin 2 [Source:HGNC Symbol;Acc:HGNC:3177]	-	1	0	121	64	0.017192	0	3.73216	1.49108
ENSG00000132000	9.16748	8.54117	192.038	73.0435	-3.89956	3.59158e-07	3.89302e-06	PODNL1	19	13931187	13953392	-	4168	protein_coding	podocan like 1 [Source:HGNC Symbol;Acc:HGNC:26275]	-	12	10	138	70	0.081126	0.0752307	1.67381	0.641312
ENSG00000148057	12.9873	15.3741	154.465	138.783	-3.37127	3.5983e-07	3.89786e-06	IDNK	9	83623049	83644130	+	1814	protein_coding	IDNK, gluconokinase [Source:HGNC Symbol;Acc:HGNC:31367]	-	17	18	111	133	0.264069	0.311141	3.09342	2.79971
ENSG00000143153	780.764	812.265	3693.25	6160.69	-2.62904	3.59935e-07	3.89786e-06	ATP1B1	1	169105697	169132722	+	2962	protein_coding	ATPase Na+/K+ transporting subunit beta 1 [Source:HGNC Symbol;Acc:HGNC:804]	-	1022	951	2654	5904	9.72237	10.0674	45.297	76.1132
ENSG00000120322	0.763957	0	132.2	87.6521	-8.09131	3.61972e-07	3.91602e-06	PCDHB8	5	141177790	141180529	+	2740	protein_coding	protocadherin beta 8 [Source:HGNC Symbol;Acc:HGNC:8693]	Cadherin	1	0	95	84	0.0102839	0	1.75278	1.17065
ENSG00000104447	740.274	813.973	3377.36	7660.17	-2.82828	3.62109e-07	3.91602e-06	TRPS1	8	115408496	115809673	-	11072	protein_coding	transcriptional repressor GATA binding 1 [Source:HGNC Symbol;Acc:HGNC:12340]	GATA	969	953	2427	7341	2.46606	2.69892	11.0815	25.3179
ENSG00000231868	0	0	87.6695	31.3043	-8.64006	3.65433e-07	3.94835e-06	AL031848.1	1	6443034	6447006	-	351	antisense	-	-	0	0	63	30	0	0	9.07376	3.26372
ENSG00000114019	653.183	638.025	6095.12	2837.22	-2.79017	3.69793e-07	3.99181e-06	AMOTL2	3	134355874	134375479	-	5984	protein_coding	angiomotin like 2 [Source:HGNC Symbol;Acc:HGNC:17812]	-	855	747	4380	2719	4.02607	3.91428	37.0029	17.3507
ENSG00000139631	242.174	207.55	1724.17	1114.43	-2.65761	3.80211e-07	4.09863e-06	CSAD	12	53157663	53180909	-	4390	protein_coding	cysteine sulfinic acid decarboxylase [Source:HGNC Symbol;Acc:HGNC:18966]	-	317	243	1239	1068	2.0347	1.73566	14.2679	9.28978
ENSG00000170921	1079.47	1012.13	5864.11	5658.78	-2.4618	3.86494e-07	4.16447e-06	TANC2	17	63009556	63427699	+	22866	protein_coding	tetratricopeptide repeat, ankyrin repeat and coiled-coil containing 2 [Source:HGNC Symbol;Acc:HGNC:30212]	-	1413	1185	4214	5423	1.74124	1.62499	9.31661	9.05625
ENSG00000120885	1291.85	1442.6	13519.2	5869.56	-2.82585	3.87452e-07	4.17289e-06	CLU	8	27596917	27615031	-	6616	protein_coding	clusterin [Source:HGNC Symbol;Acc:HGNC:2095]	-	1691	1689	9715	5625	7.20202	8.00492	74.2337	32.4658
ENSG00000225684	0	0	86.2779	31.3043	-8.62311	3.88622e-07	4.18358e-06	FAM225B	9	113103338	113111500	-	7407	lincRNA	family with sequence similarity 225 member B (non-protein coding) [Source:HGNC Symbol;Acc:HGNC:21865]	-	0	0	62	30	0	0	0.423158	0.15466
ENSG00000131188	305.583	275.88	2547.98	1341.91	-2.74161	3.89013e-07	4.18588e-06	PRR7	5	177446445	177456286	+	1772	protein_coding	proline rich 7, synaptic [Source:HGNC Symbol;Acc:HGNC:28130]	-	400	323	1831	1286	6.36067	5.71559	52.237	27.7125
ENSG00000280217	0	1.70823	64.0126	83.4782	-6.49718	3.94142e-07	4.23528e-06	AC126564.1	12	131235511	131237523	+	2013	TEC	-	-	0	2	46	80	0	0.0311536	1.15523	1.51756
ENSG00000168447	0.763957	0	178.122	59.4782	-8.20206	3.94979e-07	4.24234e-06	SCNN1B	16	23278231	23381299	+	3918	protein_coding	sodium channel epithelial 1 beta subunit [Source:HGNC Symbol;Acc:HGNC:10600]	-	1	0	128	57	0.00719187	0	1.65158	0.555532
ENSG00000151240	890.009	885.719	8270.15	3866.09	-2.77273	3.96157e-07	4.25306e-06	DIP2C	10	274190	689668	-	8563	protein_coding	disco interacting protein 2 homolog C [Source:HGNC Symbol;Acc:HGNC:29150]	AMP-binding	1165	1037	5943	3705	3.8336	3.7973	35.086	16.5219
ENSG00000278709	35.906	31.6023	243.526	277.565	-2.9481	3.98045e-07	4.27095e-06	NKILA	20	57710183	57712780	+	2598	antisense	NF-kappaB interacting lncRNA [Source:HGNC Symbol;Acc:HGNC:51599]	-	47	37	175	266	0.509759	0.446565	3.40528	3.90968
ENSG00000197183	290.303	285.275	2038.66	1423.3	-2.58828	3.98889e-07	4.27656e-06	NOL4L	20	32443059	32585074	-	9448	protein_coding	nucleolar protein 4 like [Source:HGNC Symbol;Acc:HGNC:16106]	-	380	334	1465	1364	1.13331	1.10848	7.83883	5.51281
ENSG00000123999	34.378	35.8729	556.632	174.261	-3.37748	4.00681e-07	4.29382e-06	INHA	2	219569162	219575713	+	1753	protein_coding	inhibin alpha subunit [Source:HGNC Symbol;Acc:HGNC:6065]	-	45	42	400	167	0.723331	0.751259	11.5354	3.63775
ENSG00000105514	356.004	376.665	2280.8	1909.56	-2.51579	4.03813e-07	4.32542e-06	RAB3D	19	11322046	11346270	-	4417	protein_coding	RAB3D, member RAS oncogene family [Source:HGNC Symbol;Acc:HGNC:9779]	Ras	466	441	1639	1830	2.97279	3.13064	18.7588	15.8206
novel.161	0	0	23.6568	100.174	-8.70864	4.10325e-07	4.39118e-06	-	5	58062670	58068690	-	3719	-	-	-	0	0	17	96	0	0	0.231087	0.985698
ENSG00000173110	3.81978	13.6659	253.267	70.9565	-4.22098	4.23319e-07	4.52409e-06	HSPA6	1	161524540	161526910	+	2371	protein_coding	heat shock protein family A (Hsp70) member 6 [Source:HGNC Symbol;Acc:HGNC:5239]	HSP70	5	16	182	68	0.0594217	0.211598	3.88055	1.09516
ENSG00000232815	23.6827	13.6659	257.442	136.696	-3.39364	4.26283e-07	4.5537e-06	DUX4L50	9	63817748	63818462	-	715	unprocessed_pseudogene	double homeobox 4 like 50 (pseudogene) [Source:HGNC Symbol;Acc:HGNC:51788]	-	31	16	185	131	1.22169	0.701676	13.0804	6.99623
ENSG00000172061	0.763957	3.41647	69.5789	70.9565	-5.10123	4.40756e-07	4.69769e-06	LRRC15	3	194355247	194369743	-	5940	protein_coding	leucine rich repeat containing 15 [Source:HGNC Symbol;Acc:HGNC:20818]	-	1	4	50	68	0.00474373	0.0211152	0.425537	0.437141
ENSG00000117115	90.9108	72.5999	890.61	397.565	-2.97644	4.531e-07	4.82489e-06	PADI2	1	17066761	17119435	-	5984	protein_coding	peptidyl arginine deiminase 2 [Source:HGNC Symbol;Acc:HGNC:18341]	-	119	85	640	381	0.560353	0.4454	5.40682	2.43126
ENSG00000278921	12.2233	11.9576	189.255	97.0434	-3.56267	4.60715e-07	4.90377e-06	EPB41L4A-AS2	5	112419583	112420978	+	1396	lincRNA	EPB41L4A antisense RNA 2 (head to head) [Source:HGNC Symbol;Acc:HGNC:25643]	-	16	14	136	93	0.322954	0.31446	4.92501	2.54388
ENSG00000143416	749.441	705.5	7920.87	3010.43	-2.90929	4.66775e-07	4.96156e-06	SELENBP1	1	151364302	151372733	-	3504	protein_coding	selenium binding protein 1 [Source:HGNC Symbol;Acc:HGNC:10719]	-	981	826	5692	2885	7.88881	7.3916	82.1211	31.4399
ENSG00000231806	2.29187	0.854117	64.0126	67.8261	-5.36612	4.72515e-07	5.01806e-06	PCAT7	9	94555054	94603990	+	5904	antisense	prostate cancer associated transcript 7 (non-protein coding) [Source:HGNC Symbol;Acc:HGNC:48824]	-	3	1	46	65	0.014318	0.005311	0.393881	0.420403
ENSG00000016402	1.52791	0	51.4884	98.0869	-6.55568	4.73254e-07	5.02364e-06	IL20RA	6	136999971	137045180	-	4730	protein_coding	interleukin 20 receptor subunit alpha [Source:HGNC Symbol;Acc:HGNC:6003]	-	2	0	37	94	0.0119145	0	0.395452	0.758867
ENSG00000241635	0	0	30.6147	82.4348	-8.57645	4.75355e-07	5.04367e-06	UGT1A1	2	233760248	233773299	+	4467	protein_coding	UDP glucuronosyltransferase family 1 member A1 [Source:HGNC Symbol;Acc:HGNC:12530]	UDPGT	0	0	22	79	0	0	0.248978	0.675321
ENSG00000143365	0	0	101.585	21.913	-8.69301	4.79901e-07	5.08962e-06	RORC	1	151806071	151831872	-	6314	protein_coding	RAR related orphan receptor C [Source:HGNC Symbol;Acc:HGNC:10260]	zf-C4	0	0	73	21	0	0	0.584483	0.127003
ENSG00000004399	981.684	914.759	11512.5	3771.13	-3.01051	4.90763e-07	5.19781e-06	PLXND1	3	129555175	129606818	-	9738	protein_coding	plexin D1 [Source:HGNC Symbol;Acc:HGNC:9107]	Sema	1285	1071	8273	3614	3.71826	3.4486	42.9484	14.1715
ENSG00000130590	145.152	114.452	1387.4	593.739	-2.93096	5.05942e-07	5.35378e-06	SAMD10	20	63974113	63980008	-	2453	protein_coding	sterile alpha motif domain containing 10 [Source:HGNC Symbol;Acc:HGNC:16129]	SAM_2	190	134	997	569	2.18254	1.71289	20.5471	8.85755
ENSG00000106397	1793.77	1777.42	18377.2	7332.52	-2.84778	5.19067e-07	5.48529e-06	PLOD3	7	101205977	101218420	-	5671	protein_coding	procollagen-lysine,2-oxoglutarate 5-dioxygenase 3 [Source:HGNC Symbol;Acc:HGNC:9083]	-	2348	2081	13206	7027	11.6666	11.5063	117.724	47.3161
ENSG00000258839	120.705	126.409	1262.16	563.478	-2.88455	5.28332e-07	5.57573e-06	MC1R	16	89912119	89920977	+	5566	protein_coding	melanocortin 1 receptor [Source:HGNC Symbol;Acc:HGNC:6929]	7tm_1	158	148	907	540	0.799872	0.83376	8.23792	3.70467
ENSG00000199753	29.7943	38.4352	1001.94	111.652	-4.02822	5.28334e-07	5.57573e-06	SNORD104	17	64146083	64146152	+	70	snoRNA	small nucleolar RNA, C/D box 104 [Source:HGNC Symbol;Acc:HGNC:32768]	-	39	45	720	107	15.699	20.1575	519.982	58.3693
ENSG00000115705	0	5.97882	86.2779	90.7826	-4.92642	5.30502e-07	5.5961e-06	TPO	2	1374223	1543711	+	6841	protein_coding	thyroid peroxidase [Source:HGNC Symbol;Acc:HGNC:12015]	-	0	7	62	87	0	0.0320849	0.458169	0.485622
ENSG00000273769	0.763957	0	109.935	92.8695	-7.97592	5.35581e-07	5.64465e-06	U52112.1	X	153880672	153888990	+	1392	processed_transcript	-	-	1	0	79	89	0.0202426	0	2.86907	2.44146
ENSG00000260459	0.763957	0	84.8863	118.956	-7.98581	5.42354e-07	5.71092e-06	FTLP14	16	68822587	68823070	+	484	processed_pseudogene	ferritin light chain pseudogene 14 [Source:HGNC Symbol;Acc:HGNC:37964]	Ferritin	1	0	61	114	0.0582185	0	6.37145	8.99411
ENSG00000175115	1266.64	1201.74	11146.5	5245.56	-2.73128	5.43369e-07	5.71906e-06	PACS1	11	66070363	66244747	+	9037	protein_coding	phosphofurin acidic cluster sorting protein 1 [Source:HGNC Symbol;Acc:HGNC:30032]	-	1658	1407	8010	5027	5.16972	4.88194	44.8087	21.2414
ENSG00000175482	23.6827	40.9976	470.354	178.435	-3.32704	5.53139e-07	5.8167e-06	POLD4	11	67350777	67356972	-	3049	protein_coding	DNA polymerase delta 4, accessory subunit [Source:HGNC Symbol;Acc:HGNC:14106]	-	31	48	338	171	0.286491	0.493636	5.60419	2.1416
ENSG00000137699	0	0	61.2295	42.7826	-8.44899	5.59757e-07	5.88106e-06	TRIM29	11	120111275	120185529	-	10218	protein_coding	tripartite motif containing 29 [Source:HGNC Symbol;Acc:HGNC:17274]	-	0	0	44	41	0	0	0.217691	0.15322
novel.60	1.52791	0.854117	165.598	18.7826	-6.25509	5.60074e-07	5.88178e-06	-	14	104860851	104862633	-	1783	-	-	-	2	1	119	18	0.0316071	0.0175862	3.37403	0.385496
novel.476	82.5073	119.576	782.067	556.174	-2.72767	5.71407e-07	5.99013e-06	-	CHR_HSCHR17_7_CTG4	36495562	36539558	-	9384	-	PF06423:GWT1|PF00063:Myosin head (motor domain)	Myosin_head	108	140	562	533	0.324296	0.467803	3.02762	2.16889
ENSG00000107968	60.3526	30.7482	318.672	400.696	-2.97908	5.75105e-07	6.02622e-06	MAP3K8	10	30433937	30461833	+	3601	protein_coding	mitogen-activated protein kinase kinase kinase 8 [Source:HGNC Symbol;Acc:HGNC:6860]	Pkinase	79	36	229	384	0.618174	0.313474	3.21489	4.07199
ENSG00000135245	388.09	346.771	1867.5	2266.43	-2.49199	5.76325e-07	6.03633e-06	HILPDA	7	128455849	128458418	+	2070	protein_coding	hypoxia inducible lipid droplet associated [Source:HGNC Symbol;Acc:HGNC:28859]	-	508	406	1342	2172	6.91512	6.15004	32.7745	40.0671
ENSG00000184254	140.568	130.68	866.954	746.087	-2.57178	5.76617e-07	6.03671e-06	ALDH1A3	15	100877714	100916626	+	5772	protein_coding	aldehyde dehydrogenase 1 family member A3 [Source:HGNC Symbol;Acc:HGNC:409]	Aldedh	184	153	623	715	0.898251	0.831166	5.45652	4.73019
ENSG00000183668	0	0	51.4884	50.0869	-8.41686	6.08607e-07	6.35471e-06	PSG9	19	43211791	43269530	-	5048	protein_coding	pregnancy specific beta-1-glycoprotein 9 [Source:HGNC Symbol;Acc:HGNC:9526]	V-set	0	0	37	48	0	0	0.370541	0.363095
ENSG00000119986	183.35	196.447	1931.51	823.304	-2.85826	6.09513e-07	6.36135e-06	AVPI1	10	97677424	97687323	-	1457	protein_coding	arginine vasopressin induced 1 [Source:HGNC Symbol;Acc:HGNC:30898]	-	240	230	1388	789	4.6415	4.94984	48.1597	20.6784
ENSG00000179750	24.4466	16.2282	169.773	195.13	-3.16278	6.28254e-07	6.54538e-06	APOBEC3B	22	38982347	38992804	+	1896	protein_coding	apolipoprotein B mRNA editing enzyme catalytic subunit 3B [Source:HGNC Symbol;Acc:HGNC:17352]	-	32	19	122	187	0.475574	0.314223	3.25293	3.76619
ENSG00000103257	6430.99	6663.82	58104	27289	-2.70511	6.29574e-07	6.55624e-06	SLC7A5	16	87830023	87869488	-	4745	protein_coding	solute carrier family 7 member 5 [Source:HGNC Symbol;Acc:HGNC:11063]	-	8418	7802	41754	26152	49.9895	51.5576	444.852	210.459
ENSG00000169894	6.11165	2.56235	97.4105	70.9565	-4.26317	6.30313e-07	6.56103e-06	MUC3A	7	100949555	100968346	+	11374	protein_coding	mucin 3A, cell surface associated [Source:HGNC Symbol;Acc:HGNC:7513]	-	8	3	70	68	0.0198191	0.00827048	0.311128	0.228294
novel.645	19.8629	10.2494	347.895	84.5217	-3.83686	6.59821e-07	6.8561e-06	-	CHR_HSCHR6_MHC_MCF_CTG1	33462003	33484658	-	8858	-	PF00788:Ras association (RalGDS/AF-6) domain|PF00617:RasGEF domain|PF00618:RasGEF N-terminal motif	RA	26	12	250	81	0.0827073	0.0424784	1.42678	0.349179
ENSG00000198739	0.763957	0.854117	50.0968	87.6521	-6.41828	6.69686e-07	6.94943e-06	LRRTM3	10	66926006	67099830	+	4650	protein_coding	leucine rich repeat transmembrane neuronal 3 [Source:HGNC Symbol;Acc:HGNC:19410]	-	1	1	36	84	0.00605973	0.00674326	0.391384	0.689803
ENSG00000213563	666.934	769.559	6679.58	3014.61	-2.75448	6.78546e-07	7.03518e-06	C8orf82	8	144525733	144529132	-	3001	protein_coding	chromosome 8 open reading frame 82 [Source:HGNC Symbol;Acc:HGNC:33826]	-	873	901	4800	2889	8.19699	9.41416	80.8591	36.7604
ENSG00000121966	54.2409	63.2046	481.486	327.652	-2.78412	6.95117e-07	7.19436e-06	CXCR4	2	136114349	136118165	-	2224	protein_coding	C-X-C motif chemokine receptor 4 [Source:HGNC Symbol;Acc:HGNC:2561]	7tm_1	71	74	346	314	0.89956	1.04332	7.86493	5.3913
ENSG00000171617	233.771	240.007	1234.33	1423.3	-2.488	6.9765e-07	7.21449e-06	ENC1	5	74627406	74641424	-	5858	protein_coding	ectodermal-neural cortex 1 [Source:HGNC Symbol;Acc:HGNC:3345]	BACK	306	281	887	1364	1.4719	1.50411	7.6547	8.89127
ENSG00000170954	0	0	51.4884	48	-8.38663	7.01496e-07	7.25084e-06	ZNF415	19	53107879	53133077	-	3780	protein_coding	zinc finger protein 415 [Source:HGNC Symbol;Acc:HGNC:20636]	KRAB	0	0	37	46	0	0	0.494839	0.464692
novel.534	1.52791	4.27058	102.977	50.0869	-4.73749	7.07876e-07	7.31358e-06	-	CHR_HSCHR22_1_CTG7	23966856	24031806	+	6139	-	PF01187:Macrophage migration inhibitory factor (MIF)	MIF	2	5	74	48	0.00917992	0.0255385	0.609379	0.298567
ENSG00000151690	101.606	112.743	592.813	701.217	-2.59432	7.10703e-07	7.33958e-06	MFSD6	2	190408355	190509205	+	6031	protein_coding	major facilitator superfamily domain containing 6 [Source:HGNC Symbol;Acc:HGNC:24711]	-	133	132	426	672	0.621396	0.686289	3.57087	4.2548
ENSG00000250786	0	0.854117	76.5368	118.956	-7.91721	7.26786e-07	7.49256e-06	SNHG18	5	9546200	9550609	+	1951	lincRNA	small nucleolar RNA host gene 18 [Source:HGNC Symbol;Acc:HGNC:49007]	-	0	1	55	114	0	0.0160718	1.42515	2.23124
novel.117	0	0	19.4821	96	-8.60834	7.39095e-07	7.61281e-06	-	20	53738644	53742306	+	2118	-	-	-	0	0	14	92	0	0	0.334161	1.65867
ENSG00000070404	252.106	266.484	2705.23	1072.7	-2.86461	7.43233e-07	7.64876e-06	FSTL3	19	676365	683399	+	3067	protein_coding	follistatin like 3 [Source:HGNC Symbol;Acc:HGNC:3973]	-	330	312	1944	1028	3.03184	3.1898	32.0432	12.7991
ENSG00000232480	1.52791	1.70823	89.061	42.7826	-5.34701	7.56822e-07	7.77843e-06	TGFB2-AS1	1	218344196	218345678	-	557	antisense	TGFB2 antisense RNA 1 (head to head) [Source:HGNC Symbol;Acc:HGNC:50628]	-	2	2	64	41	0.101177	0.112589	5.80869	2.81078
ENSG00000226332	41.2537	28.1858	475.92	179.478	-3.23514	7.58818e-07	7.79555e-06	AL354836.1	20	62305432	62306325	-	681	antisense	-	-	54	33	342	172	2.23436	1.51946	25.3882	9.64451
ENSG00000167562	84.0352	80.287	402.166	728.348	-2.78313	7.6899e-07	7.89318e-06	ZNF701	19	52555457	52587174	+	7201	protein_coding	zinc finger protein 701 [Source:HGNC Symbol;Acc:HGNC:25597]	-	110	94	289	698	0.430434	0.409315	2.02889	3.70136
ENSG00000231437	0.763957	0.854117	65.4042	65.7391	-6.34424	7.86966e-07	8.06367e-06	LINC01750	1	111989770	111998842	+	3590	lincRNA	long intergenic non-protein coding RNA 1750 [Source:HGNC Symbol;Acc:HGNC:52538]	-	1	1	47	63	0.00784896	0.0087343	0.661846	0.670108
ENSG00000130522	1155.87	1233.34	7527.05	5535.65	-2.45081	7.91274e-07	8.1043e-06	JUND	19	18279760	18281622	-	1863	protein_coding	JunD proto-oncogene, AP-1 transcription factor subunit [Source:HGNC Symbol;Acc:HGNC:6206]	Jun	1513	1444	5409	5305	22.884	24.304	146.777	108.735
ENSG00000069966	409.481	399.727	2676.01	1892.87	-2.49709	7.97192e-07	8.15329e-06	GNB5	15	52115105	52191369	-	13302	protein_coding	G protein subunit beta 5 [Source:HGNC Symbol;Acc:HGNC:4401]	WD40	536	468	1923	1814	1.13541	1.10319	7.30829	5.20738
ENSG00000254337	0	0.854117	82.1032	107.478	-7.87222	8.14533e-07	8.31895e-06	AC083967.1	8	68848742	68852763	-	515	lincRNA	-	-	0	1	59	103	0	0.0608857	5.7916	7.63711
ENSG00000174151	248.286	284.421	1733.91	1300.17	-2.50979	8.14699e-07	8.31895e-06	CYB561D1	1	109494052	109502932	+	5690	protein_coding	cytochrome b561 family member D1 [Source:HGNC Symbol;Acc:HGNC:26804]	Cytochrom_B561	325	333	1246	1246	1.60945	1.83508	11.0703	8.36189
ENSG00000177706	207.032	208.404	2248.79	851.478	-2.89926	8.16174e-07	8.32681e-06	FAM20C	7	192969	260745	+	4629	protein_coding	FAM20C, golgi associated secretory pathway kinase [Source:HGNC Symbol;Acc:HGNC:22140]	DUF1193	271	244	1616	816	1.64964	1.65282	17.6485	6.73134
ENSG00000231574	0.763957	0	93.2358	94.9565	-7.86906	8.17613e-07	8.33789e-06	LINC02015	3	177816865	177899224	+	3005	lincRNA	long intergenic non-protein coding RNA 2015 [Source:HGNC Symbol;Acc:HGNC:52850]	-	1	0	67	91	0.00937696	0	1.12716	1.15637
ENSG00000178826	12.9873	12.8117	153.074	112.696	-3.36319	8.48731e-07	8.62542e-06	TMEM139	7	143279957	143288048	+	2564	protein_coding	transmembrane protein 139 [Source:HGNC Symbol;Acc:HGNC:22058]	-	17	15	110	108	0.186826	0.183441	2.16884	1.60844
novel.157	0	0	66.7958	33.3913	-8.39308	8.5677e-07	8.69962e-06	-	5	149125369	149129491	+	816	-	-	-	0	0	48	32	0	0	2.97375	1.49747
ENSG00000148341	1530.97	1555.35	17211	5898.78	-2.90449	8.62517e-07	8.75045e-06	SH3GLB2	9	129007036	129028303	-	6814	protein_coding	SH3 domain containing GRB2 like, endophilin B2 [Source:HGNC Symbol;Acc:HGNC:10834]	-	2004	1821	12368	5653	8.28709	8.37974	91.7595	31.6793
novel.141	0.763957	0	44.5305	170.087	-8.06362	8.66658e-07	8.78869e-06	-	3	63718510	63741823	+	1446	-	-	-	1	0	32	163	0.0194867	0	1.11876	4.30445
ENSG00000051128	151.263	140.075	1881.41	571.826	-3.07324	8.88459e-07	8.99817e-06	HOMER3	19	18929201	18941261	-	3422	protein_coding	homer scaffolding protein 3 [Source:HGNC Symbol;Acc:HGNC:17514]	-	198	164	1352	548	1.63039	1.50275	19.9733	6.11504
ENSG00000162444	0	0	50.0968	45.913	-8.33516	8.91242e-07	9.02248e-06	RBP7	1	9997206	10016020	+	861	protein_coding	retinol binding protein 7 [Source:HGNC Symbol;Acc:HGNC:30316]	-	0	0	36	44	0	0	2.11375	1.95141
ENSG00000214022	2644.05	2654.59	20702.5	11100.5	-2.58543	8.99266e-07	9.09592e-06	REPIN1	7	150368189	150374044	+	4649	protein_coding	replication initiator 1 [Source:HGNC Symbol;Acc:HGNC:17922]	zf-C2H2	3461	3108	14877	10638	20.9772	20.9625	161.774	87.3774
ENSG00000257829	0.763957	1.70823	50.0968	74.0869	-5.67428	9.0538e-07	9.14992e-06	AC121757.1	12	52306616	52308371	-	624	antisense	-	-	1	2	36	71	0.0451567	0.1005	2.91656	4.34483
ENSG00000166828	1.52791	0	90.4526	48	-6.43798	9.07722e-07	9.16966e-06	SCNN1G	16	23182715	23216883	+	3507	protein_coding	sodium channel epithelial 1 gamma subunit [Source:HGNC Symbol;Acc:HGNC:10602]	-	2	0	65	46	0.0160694	0	0.936982	0.500865
ENSG00000058404	54.2409	74.3081	808.507	289.043	-3.09354	9.11834e-07	9.20726e-06	CAMK2B	7	44217150	44334577	-	8159	protein_coding	calcium/calmodulin dependent protein kinase II beta [Source:HGNC Symbol;Acc:HGNC:1461]	Pkinase	71	87	581	277	0.245204	0.334353	3.59992	1.29641
ENSG00000168032	5.3477	3.41647	70.9705	86.6087	-4.16197	9.25937e-07	9.32971e-06	ENTPD3	3	40387156	40428619	+	3365	protein_coding	ectonucleoside triphosphate diphosphohydrolase 3 [Source:HGNC Symbol;Acc:HGNC:3365]	-	7	4	51	83	0.0586164	0.0372733	0.766194	0.941872
ENSG00000256229	0	0.854117	43.1389	170.087	-8.04343	9.30384e-07	9.36983e-06	ZNF486	19	20167228	20200490	+	4261	protein_coding	zinc finger protein 486 [Source:HGNC Symbol;Acc:HGNC:20807]	KRAB	0	1	31	163	0	0.00735887	0.367793	1.46075
ENSG00000255438	3.81978	1.70823	80.7116	58.4348	-4.63608	9.32657e-07	9.38541e-06	AL354813.1	20	47677901	47686297	+	2437	antisense	-	-	5	2	58	56	0.0578124	0.0257334	1.20317	0.877468
ENSG00000144063	0	0	51.4884	43.8261	-8.32419	9.45412e-07	9.50566e-06	MALL	2	110083870	110116566	-	3167	protein_coding	mal, T cell differentiation protein like [Source:HGNC Symbol;Acc:HGNC:6818]	-	0	0	37	42	0	0	0.590619	0.506407
ENSG00000250120	1.52791	0	57.0547	76.1739	-6.38713	9.46854e-07	9.51611e-06	PCDHA10	5	140855883	141012344	+	15224	protein_coding	protocadherin alpha 10 [Source:HGNC Symbol;Acc:HGNC:8664]	Cadherin	2	0	41	73	0.00370175	0	0.136147	0.183102
ENSG00000105974	206.268	227.195	1252.42	1139.48	-2.46421	9.59684e-07	9.63599e-06	CAV1	7	116524785	116561184	+	4082	protein_coding	caveolin 1 [Source:HGNC Symbol;Acc:HGNC:1527]	-	270	266	900	1092	1.86379	2.0433	11.1461	10.2152
ENSG00000163995	26.7385	27.3317	356.244	145.043	-3.21067	9.60008e-07	9.63599e-06	ABLIM2	4	7965310	8158832	-	6049	protein_coding	actin binding LIM protein family member 2 [Source:HGNC Symbol;Acc:HGNC:19195]	LIM	35	32	256	139	0.163039	0.165878	2.13949	0.877465
ENSG00000133056	805.974	773.83	5976.83	3372.52	-2.565	9.7029e-07	9.73092e-06	PIK3C2B	1	204422628	204494724	-	9414	protein_coding	phosphatidylinositol-4-phosphate 3-kinase catalytic subunit type 2 beta [Source:HGNC Symbol;Acc:HGNC:8972]	PI3_PI4_kinase	1055	906	4295	3232	3.1578	3.0177	23.0644	13.1098
ENSG00000188910	0	0	80.7116	24	-8.45503	9.79578e-07	9.81574e-06	GJB3	1	34781189	34786369	+	2387	protein_coding	gap junction protein beta 3 [Source:HGNC Symbol;Acc:HGNC:4285]	Connexin	0	0	58	23	0	0	1.22837	0.367938
ENSG00000234444	151.263	161.428	748.669	1112.35	-2.57378	9.84047e-07	9.84798e-06	ZNF736	7	64307459	64354860	+	9409	protein_coding	zinc finger protein 736 [Source:HGNC Symbol;Acc:HGNC:32467]	KRAB	198	189	538	1066	0.592964	0.629855	2.89063	4.32626
ENSG00000249346	0.763957	0	101.585	81.3913	-7.82734	9.95073e-07	9.94989e-06	LINC01016	6	33867506	33896914	-	3796	lincRNA	long intergenic non-protein coding RNA 1016 [Source:HGNC Symbol;Acc:HGNC:48991]	-	1	0	73	78	0.00742301	0	0.972188	0.784634
ENSG00000096433	1437	1311.92	16271.7	5089.04	-2.95794	1.01179e-06	1.01042e-05	ITPR3	6	33620365	33696574	+	9870	protein_coding	inositol 1,4,5-trisphosphate receptor type 3 [Source:HGNC Symbol;Acc:HGNC:6182]	Ion_trans	1881	1536	11693	4877	5.37005	4.87974	59.8911	18.8684
novel.177	0.763957	0	102.977	79.3043	-7.82167	1.02895e-06	1.02582e-05	-	7	64947042	64950709	+	1616	-	-	-	1	0	74	76	0.0174367	0	2.31496	1.79585
ENSG00000145217	103.898	112.743	1399.93	427.826	-3.07604	1.07344e-06	1.06702e-05	SLC26A1	4	979073	993440	-	4293	protein_coding	solute carrier family 26 member 1 [Source:HGNC Symbol;Acc:HGNC:10993]	Sulfate_transp	136	132	1006	410	0.892657	0.96413	11.8465	3.64688
novel.184	0	0	59.8379	35.4783	-8.322	1.07535e-06	1.06802e-05	-	7	47633797	47635583	-	1787	-	-	-	0	0	43	34	0	0	1.21646	0.726529
ENSG00000163283	1.52791	0	96.0189	42.7826	-6.44145	1.07762e-06	1.06905e-05	ALPP	2	232378534	232382889	+	3059	protein_coding	alkaline phosphatase, placental [Source:HGNC Symbol;Acc:HGNC:439]	-	2	0	69	41	0.0184229	0	1.14031	0.511803
ENSG00000273982	1.52791	0	52.88	79.3043	-6.37667	1.07775e-06	1.06905e-05	AC005746.3	17	61354763	61355155	-	393	antisense	-	-	2	0	38	76	0.143398	0	4.88815	7.38448
ENSG00000253266	0	0	65.4042	31.3043	-8.34184	1.10994e-06	1.09914e-05	AC100860.1	8	141055290	141060596	+	1132	lincRNA	-	-	0	0	47	30	0	0	2.09896	1.01198
ENSG00000175318	3.05583	1.70823	70.9705	58.4348	-4.74993	1.12122e-06	1.10938e-05	GRAMD2A	15	72159807	72197785	-	4987	protein_coding	GRAM domain containing 2A [Source:HGNC Symbol;Acc:HGNC:27287]	GRAM	4	2	51	56	0.022601	0.0125752	0.516993	0.428793
ENSG00000224652	0.763957	0	148.899	49.0435	-7.93839	1.12628e-06	1.11345e-05	LINC00885	3	196142636	196160890	+	1828	lincRNA	long intergenic non-protein coding RNA 885 [Source:HGNC Symbol;Acc:HGNC:48571]	-	1	0	107	47	0.0154145	0	2.95911	0.981794
ENSG00000267254	6.11165	7.68705	108.543	79.3043	-3.76836	1.127e-06	1.1137e-05	AC020928.1	19	36797518	36828115	+	1506	antisense	-	KRAB	8	9	78	76	0.149683	0.187387	2.61832	1.92703
ENSG00000273443	0	0	68.1874	29.2174	-8.35171	1.14394e-06	1.12902e-05	AL645608.9	1	1062208	1063288	-	829	lincRNA	-	SH2	0	0	49	28	0	0	2.9881	1.28974
ENSG00000272189	6.11165	7.68705	73.7537	116.87	-3.79373	1.15254e-06	1.13704e-05	AL024508.2	6	136550661	136552554	+	1894	antisense	-	-	8	9	53	112	0.119019	0.149	1.41465	2.25807
ENSG00000126353	0.763957	0	122.459	62.6087	-7.84203	1.15708e-06	1.14103e-05	CCR7	17	40553769	40565472	-	2508	protein_coding	C-C motif chemokine receptor 7 [Source:HGNC Symbol;Acc:HGNC:1608]	7tm_1	1	0	88	60	0.0112352	0	1.77382	0.913529
ENSG00000154217	270.441	316.023	1765.91	1434.78	-2.44828	1.17509e-06	1.15735e-05	PITPNC1	17	67377281	67697261	+	7819	protein_coding	phosphatidylinositol transfer protein, cytoplasmic 1 [Source:HGNC Symbol;Acc:HGNC:21045]	IP_trans	354	370	1269	1375	1.27573	1.48379	8.20473	6.71507
ENSG00000185650	1004.6	940.382	5901.69	4427.48	-2.40882	1.18724e-06	1.16883e-05	ZFP36L1	14	68787660	68796253	-	5160	protein_coding	ZFP36 ring finger protein like 1 [Source:HGNC Symbol;Acc:HGNC:1107]	zf-CCCH	1315	1101	4241	4243	7.18096	6.69053	41.5501	31.3995
ENSG00000172725	1826.62	1901.26	25388	6409.04	-3.09242	1.19705e-06	1.1775e-05	CORO1B	11	67435510	67443821	-	5327	protein_coding	coronin 1B [Source:HGNC Symbol;Acc:HGNC:2253]	-	2391	2226	18244	6142	12.6475	13.1028	173.137	44.0277
ENSG00000226363	6.87561	3.41647	157.248	45.913	-4.28912	1.1983e-06	1.17823e-05	HAGLROS	2	176177717	176179008	+	1121	lincRNA	HAGLR opposite strand (non-protein coding) [Source:HGNC Symbol;Acc:HGNC:50646]	-	9	4	113	44	0.226226	0.111886	5.09597	1.49881
ENSG00000015475	662.35	632.046	6316.38	2518.96	-2.77083	1.21358e-06	1.19226e-05	BID	22	17734138	17774770	-	4446	protein_coding	BH3 interacting domain death agonist [Source:HGNC Symbol;Acc:HGNC:1050]	-	867	740	4539	2414	5.49485	5.21897	51.6113	20.7332
ENSG00000214049	0	0	47.3137	43.8261	-8.26012	1.25834e-06	1.23316e-05	UCA1	19	15828206	15836326	+	4152	lincRNA	urothelial cancer associated 1 (non-protein coding) [Source:HGNC Symbol;Acc:HGNC:37126]	-	0	0	34	42	0	0	0.413976	0.38627
ENSG00000108175	1893.85	1797.06	14816.1	7456.69	-2.59318	1.27137e-06	1.24541e-05	ZMIZ1	10	79069035	79316528	+	11048	protein_coding	zinc finger MIZ-type containing 1 [Source:HGNC Symbol;Acc:HGNC:16493]	zf-MIZ	2479	2104	10647	7146	6.32265	5.97152	48.7189	24.6989
ENSG00000170100	645.543	666.211	4050.89	2956.17	-2.41723	1.31484e-06	1.28639e-05	ZNF778	16	89217703	89237071	+	11273	protein_coding	zinc finger protein 778 [Source:HGNC Symbol;Acc:HGNC:26479]	KRAB	845	780	2911	2833	2.11214	2.16959	13.0544	9.59635
ENSG00000163932	1028.29	1014.69	8771.12	4056	-2.65035	1.32183e-06	1.2927e-05	PRKCD	3	53156009	53192717	+	3396	protein_coding	protein kinase C delta [Source:HGNC Symbol;Acc:HGNC:9399]	Pkinase	1346	1188	6303	3887	11.1682	10.9691	93.8282	43.7065
ENSG00000223855	1.52791	9.39528	114.109	82.4348	-4.18837	1.332e-06	1.30157e-05	AC147651.1	7	520391	525232	+	3506	lincRNA	-	-	2	11	82	79	0.016074	0.0983792	1.18238	0.860427
ENSG00000039139	7.63957	2.56235	65.4042	113.739	-4.12208	1.33296e-06	1.30197e-05	DNAH5	5	13690331	13944543	-	16475	protein_coding	dynein axonemal heavy chain 5 [Source:HGNC Symbol;Acc:HGNC:2950]	Dynein_heavy	10	3	47	109	0.0171033	0.00570977	0.14422	0.252639
ENSG00000260469	9.16748	5.97882	118.284	80.3478	-3.70555	1.33452e-06	1.30295e-05	C15orf59-AS1	15	73752317	73770613	+	1575	lincRNA	C15orf59 antisense RNA 1 [Source:HGNC Symbol;Acc:HGNC:51422]	-	12	7	85	77	0.214688	0.139361	2.7283	1.86685
ENSG00000266208	126.817	134.096	1091	579.13	-2.67777	1.33823e-06	1.30604e-05	AC080112.1	17	40360655	40364693	+	2094	antisense	-	Connexin	166	157	784	555	2.23377	2.35096	18.9275	10.1208
ENSG00000074219	546.993	540.656	3612.54	2380.17	-2.46185	1.35707e-06	1.32223e-05	TEAD2	19	49340595	49362457	-	2980	protein_coding	TEA domain transcription factor 2 [Source:HGNC Symbol;Acc:HGNC:11715]	TEA	716	633	2596	2281	6.77023	6.66055	44.0395	29.2286
ENSG00000158856	174.182	127.263	1134.14	714.782	-2.6158	1.37019e-06	1.33336e-05	DMTN	8	22048995	22082527	+	4473	protein_coding	dematin actin binding protein [Source:HGNC Symbol;Acc:HGNC:3382]	-	228	149	815	685	1.43629	1.0445	9.21112	5.84777
ENSG00000074181	3020.68	2980.01	35213.9	10683.1	-2.93517	1.37958e-06	1.3414e-05	NOTCH3	19	15159038	15200981	-	9394	protein_coding	notch 3 [Source:HGNC Symbol;Acc:HGNC:7883]	EGF_CA	3954	3489	25305	10238	11.8602	11.6459	136.179	41.6163
ENSG00000183844	9.93143	8.54117	144.724	79.3043	-3.59561	1.38129e-06	1.34251e-05	FAM3B	21	41304212	41357431	+	3599	protein_coding	family with sequence similarity 3 member B [Source:HGNC Symbol;Acc:HGNC:1253]	-	13	10	104	76	0.101781	0.0871246	1.46085	0.806363
ENSG00000160209	2431.67	2552.1	21999.5	9689.74	-2.66864	1.38993e-06	1.3498e-05	PDXK	21	43719094	43762307	+	11912	protein_coding	pyridoxal kinase [Source:HGNC Symbol;Acc:HGNC:8819]	-	3183	2988	15809	9286	7.52937	7.86536	67.0924	29.7675
novel.43	0	0	59.8379	32.3478	-8.27328	1.40602e-06	1.36486e-05	-	12	33022209	33024293	-	1492	-	-	-	0	0	43	31	0	0	1.45698	0.793399
ENSG00000162545	212.38	243.423	978.28	1810.43	-2.61364	1.42934e-06	1.38578e-05	CAMK2N1	1	20482391	20486220	-	2615	protein_coding	calcium/calmodulin dependent protein kinase II inhibitor 1 [Source:HGNC Symbol;Acc:HGNC:24190]	-	278	285	703	1735	2.99557	3.4174	13.5906	25.3353
ENSG00000198155	0	0	13.9158	94.9565	-8.52373	1.4594e-06	1.41319e-05	ZNF876P	4	212610	255985	+	2804	transcribed_unprocessed_pseudogene	zinc finger protein 876, pseudogene [Source:HGNC Symbol;Acc:HGNC:32472]	zf-C2H2	0	0	10	91	0	0	0.180292	1.23926
ENSG00000224126	25.9745	36.727	757.019	104.348	-3.77966	1.4622e-06	1.41531e-05	UBE2SP2	17	18677261	18677757	+	497	processed_pseudogene	ubiquitin conjugating enzyme E2 S pseudogene 2 [Source:HGNC Symbol;Acc:HGNC:32196]	UQ_con	34	43	544	100	1.92765	2.71291	55.3345	7.68321
ENSG00000275993	85.5631	70.8917	404.949	567.652	-2.63619	1.46607e-06	1.4183e-05	SIK1B	21	6111134	6123739	+	4806	protein_coding	salt inducible kinase 1B (putative) [Source:HGNC Symbol;Acc:HGNC:52389]	Pkinase	112	83	291	544	0.65666	0.541523	3.061	4.32229
ENSG00000204060	3.05583	1.70823	65.4042	60.5217	-4.7114	1.46649e-06	1.4183e-05	FOXO6	1	41361922	41383590	+	2398	protein_coding	forkhead box O6 [Source:HGNC Symbol;Acc:HGNC:24814]	Fork_head	4	2	47	58	0.0470021	0.0261519	0.990837	0.923587
ENSG00000125520	1880.86	1769.73	15839	7110.26	-2.65218	1.48219e-06	1.43232e-05	SLC2A4RG	20	63739861	63743505	+	2244	protein_coding	SLC2A4 regulator [Source:HGNC Symbol;Acc:HGNC:15930]	-	2462	2072	11382	6814	30.9152	28.9527	256.419	115.952
ENSG00000107262	1221.57	1282.88	5930.91	6737.74	-2.33873	1.51195e-06	1.45869e-05	BAG1	9	33247820	33264720	-	7073	protein_coding	BCL2 associated athanogene 1 [Source:HGNC Symbol;Acc:HGNC:937]	ubiquitin	1599	1502	4262	6457	6.37017	6.65869	30.4624	34.8599
ENSG00000275437	40.4897	44.4141	499.577	198.261	-3.03765	1.51867e-06	1.46457e-05	AL121832.3	20	62402236	62405935	-	3700	sense_intronic	-	-	53	52	359	190	0.403627	0.440681	4.90508	1.96088
novel.691	0	0	55.6632	34.4348	-8.24095	1.52362e-06	1.46875e-05	-	CHR_HSCHR7_2_CTG1	19786	33567	-	567	-	-	-	0	0	40	33	0	0	3.5664	2.22244
ENSG00000108219	1118.43	1053.98	7332.23	4593.39	-2.4566	1.53575e-06	1.47924e-05	TSPAN14	10	80454166	80533123	+	17888	protein_coding	tetraspanin 14 [Source:HGNC Symbol;Acc:HGNC:23303]	Tetraspannin	1464	1234	5269	4402	2.30614	2.1631	14.8909	9.39695
ENSG00000196407	0.763957	0	96.0189	74.0869	-7.72201	1.5383e-06	1.48108e-05	THEM5	1	151847263	151853697	-	984	protein_coding	thioesterase superfamily member 5 [Source:HGNC Symbol;Acc:HGNC:26755]	4HBT	1	0	69	71	0.0286359	0	3.54493	2.75526
ENSG00000243364	103.134	111.889	795.983	509.217	-2.60126	1.54511e-06	1.48703e-05	EFNA4	1	155063731	155069553	+	1263	protein_coding	ephrin A4 [Source:HGNC Symbol;Acc:HGNC:3224]	-	135	131	572	488	3.01187	3.2523	22.8953	14.7542
ENSG00000285416	0	0.854117	115.501	59.4782	-7.7515	1.59291e-06	1.53116e-05	AC137630.5	3	48997221	48999442	-	763	unitary_pseudogene	-	Fz	0	1	83	57	0	0.0410959	5.4993	2.85265
ENSG00000101158	3071.87	3028.7	18437	13243.8	-2.37657	1.61687e-06	1.55356e-05	NELFCD	20	58981208	58995133	+	6298	protein_coding	negative elongation factor complex member C/D [Source:HGNC Symbol;Acc:HGNC:15934]	-	4021	3546	13249	12692	17.9903	17.6546	106.349	76.9531
ENSG00000162522	2114.63	2029.38	16301	8218.43	-2.56477	1.61941e-06	1.55537e-05	KIAA1522	1	32741885	32774970	+	5965	protein_coding	KIAA1522 [Source:HGNC Symbol;Acc:HGNC:29301]	-	2768	2376	11714	7876	13.0756	12.4899	99.277	50.419
ENSG00000241111	0	0	32.0063	57.3913	-8.23646	1.65484e-06	1.58876e-05	PRICKLE2-AS1	3	64067964	64103131	+	6505	antisense	PRICKLE2 antisense RNA 1 [Source:HGNC Symbol;Acc:HGNC:40916]	-	0	0	23	55	0	0	0.178745	0.32286
ENSG00000170379	0	0	55.6632	33.3913	-8.22395	1.66787e-06	1.59996e-05	TCAF2	7	143620952	143730409	+	6409	protein_coding	TRPM8 channel associated factor 2 [Source:HGNC Symbol;Acc:HGNC:26878]	-	0	0	40	32	0	0	0.315517	0.19066
ENSG00000280924	0	0	52.88	35.4783	-8.21329	1.67271e-06	1.60396e-05	LINC00628	1	204368431	204369719	-	1289	lincRNA	long intergenic non-protein coding RNA 628 [Source:HGNC Symbol;Acc:HGNC:27008]	-	0	0	38	34	0	0	1.49034	1.00722
ENSG00000030419	51.949	52.9552	215.695	694.956	-3.11935	1.70078e-06	1.62756e-05	IKZF2	2	212999691	213152427	-	12240	protein_coding	IKAROS family zinc finger 2 [Source:HGNC Symbol;Acc:HGNC:13177]	-	68	62	155	666	0.156543	0.15883	0.640183	2.07774
ENSG00000130475	89.3829	95.6611	1061.77	370.435	-2.95149	1.70474e-06	1.6307e-05	FCHO1	19	17747718	17788568	+	5694	protein_coding	FCH domain only 1 [Source:HGNC Symbol;Acc:HGNC:29002]	-	117	112	763	355	0.578995	0.61677	6.77424	2.38073
ENSG00000213144	6.87561	4.27058	101.585	67.8261	-3.91661	1.71898e-06	1.64232e-05	AC084880.1	12	119194850	119195394	+	545	processed_pseudogene	-	-	9	5	73	65	0.465321	0.287671	6.77142	4.55424
ENSG00000139055	0	0	36.181	51.1304	-8.20102	1.75181e-06	1.67165e-05	ERP27	12	14914035	14939082	-	2426	protein_coding	endoplasmic reticulum protein 27 [Source:HGNC Symbol;Acc:HGNC:26495]	-	0	0	26	49	0	0	0.541797	0.771266
ENSG00000176485	135.984	159.72	1249.64	632.348	-2.66967	1.77246e-06	1.69068e-05	PLA2G16	11	63573195	63616883	-	3116	protein_coding	phospholipase A2 group XVI [Source:HGNC Symbol;Acc:HGNC:17825]	-	178	187	898	606	1.60964	1.88177	14.5691	7.42633
ENSG00000127824	45.8374	26.4776	674.916	142.956	-3.49609	1.77932e-06	1.69654e-05	TUBA4A	2	219249711	219278170	-	4079	protein_coding	tubulin alpha 4a [Source:HGNC Symbol;Acc:HGNC:12407]	Tubulin_C	60	31	485	137	0.41448	0.238304	6.01093	1.28252
ENSG00000067182	961.821	974.547	6672.62	4003.82	-2.46292	1.79813e-06	1.71308e-05	TNFRSF1A	12	6328757	6342114	-	4005	protein_coding	TNF receptor superfamily member 1A [Source:HGNC Symbol;Acc:HGNC:11916]	Death	1259	1141	4795	3837	8.85788	8.93317	60.5257	36.5837
ENSG00000142208	3809.09	3479.67	35155.5	13430.6	-2.73676	1.83094e-06	1.74083e-05	AKT1	14	104769349	104795751	-	11162	protein_coding	AKT serine/threonine kinase 1 [Source:HGNC Symbol;Acc:HGNC:391]	Pkinase	4986	4074	25263	12871	12.5868	11.4446	114.419	44.0321
ENSG00000171401	0	0	57.0547	31.3043	-8.21214	1.83668e-06	1.74488e-05	KRT13	17	41500981	41505705	-	2913	protein_coding	keratin 13 [Source:HGNC Symbol;Acc:HGNC:6415]	Filament	0	0	41	30	0	0	0.711536	0.39326
ENSG00000228887	2.29187	0.854117	96.0189	33.3913	-5.33517	1.84813e-06	1.75506e-05	EEF1DP1	19	14070342	14071237	+	896	processed_pseudogene	eukaryotic translation elongation factor 1 delta pseudogene 1 [Source:HGNC Symbol;Acc:HGNC:32474]	-	3	1	69	32	0.0943452	0.0349957	3.89309	1.36377
ENSG00000277010	0	0	43.1389	42.7826	-8.17552	1.85002e-06	1.75614e-05	AC120498.10	16	1223639	1224143	+	505	antisense	-	-	0	0	31	41	0	0	3.1033	3.10021
ENSG00000165804	546.229	521.011	4038.36	2165.22	-2.53902	1.85164e-06	1.75698e-05	ZNF219	14	21090046	21104722	-	6679	protein_coding	zinc finger protein 219 [Source:HGNC Symbol;Acc:HGNC:13011]	-	715	610	2902	2075	3.01648	2.86379	21.9654	11.8633
novel.80	60.3526	61.4964	488.444	303.652	-2.69965	1.90229e-06	1.80257e-05	-	17	79813057	79820892	+	5048	-	-	-	79	72	351	291	0.440975	0.447235	3.51513	2.20127
ENSG00000233030	1.52791	0.854117	27.8316	102.261	-5.76226	1.90621e-06	1.80513e-05	AC243772.2	1	149785659	149793020	-	3543	antisense	-	-	2	1	20	98	0.0159062	0.00885017	0.285373	1.05622
novel.632	0	0	73.7537	20.8696	-8.30849	1.93141e-06	1.82752e-05	-	CHR_HSCHR6_MHC_MCF_CTG1	31748838	31749819	+	982	-	-	-	0	0	53	20	0	0	2.72846	0.777709
ENSG00000119922	6.11165	12.8117	72.3621	173.217	-3.70868	1.9329e-06	1.8282e-05	IFIT2	10	89283694	89309276	+	4101	protein_coding	interferon induced protein with tetratricopeptide repeats 2 [Source:HGNC Symbol;Acc:HGNC:5409]	-	8	15	52	166	0.0549676	0.11469	0.641014	1.54567
ENSG00000250644	3.05583	7.68705	176.731	39.6522	-4.33889	1.95165e-06	1.84446e-05	AC068580.4	11	1734821	1763954	-	4807	protein_coding	-	Asp	4	9	127	38	0.0234473	0.0587071	1.33562	0.301862
ENSG00000114737	87.091	81.1411	979.672	333.913	-2.96381	1.95521e-06	1.84708e-05	CISH	3	50606490	50611831	-	5112	protein_coding	cytokine inducible SH2 containing protein [Source:HGNC Symbol;Acc:HGNC:1984]	SH2	114	95	704	320	0.628377	0.582714	6.96202	2.39033
ENSG00000122733	19.0989	17.0823	172.556	134.609	-3.08369	1.97314e-06	1.86328e-05	PHF24	9	34957608	34982544	+	5813	protein_coding	PHD finger protein 24 [Source:HGNC Symbol;Acc:HGNC:29180]	-	25	20	124	129	0.121184	0.107883	1.07839	0.8474
ENSG00000228503	0	0	54.2716	32.3478	-8.18389	2.00376e-06	1.89144e-05	AL357558.1	20	47958022	47958603	+	456	lincRNA	-	-	0	0	39	31	0	0	4.32368	2.59595
ENSG00000171954	43.5455	42.7058	354.853	232.696	-2.76686	2.03983e-06	1.92394e-05	CYP4F22	19	15508493	15552317	+	2644	protein_coding	cytochrome P450 family 4 subfamily F member 22 [Source:HGNC Symbol;Acc:HGNC:26820]	p450	57	50	255	223	0.607463	0.592968	4.87565	3.22064
ENSG00000081818	0.763957	0	83.4947	77.2174	-7.64107	2.06407e-06	1.9437e-05	PCDHB4	5	141121799	141125623	+	3825	protein_coding	protocadherin beta 4 [Source:HGNC Symbol;Acc:HGNC:8689]	Cadherin	1	0	60	74	0.00736673	0	0.793001	0.738753
ENSG00000107281	1242.19	1194.91	8270.15	4982.61	-2.44297	2.06609e-06	1.94482e-05	NPDC1	9	137039470	137046203	-	2737	protein_coding	neural proliferation, differentiation and control 1 [Source:HGNC Symbol;Acc:HGNC:7899]	NPDC1	1626	1399	5943	4775	16.7399	16.0275	109.77	66.6189
ENSG00000136147	32.0862	37.5811	162.815	425.739	-3.08129	2.08096e-06	1.95725e-05	PHF11	13	49495610	49528987	+	4841	protein_coding	PHD finger protein 11 [Source:HGNC Symbol;Acc:HGNC:17024]	-	42	44	117	408	0.244467	0.284997	1.22181	3.21828
ENSG00000138814	1891.56	1874.79	8029.41	11309.2	-2.36029	2.08178e-06	1.95725e-05	PPP3CA	4	101023409	101348278	-	5213	protein_coding	protein phosphatase 3 catalytic subunit alpha [Source:HGNC Symbol;Acc:HGNC:9314]	-	2476	2195	5770	10838	13.3835	13.2029	55.9554	79.389
ENSG00000185215	127.581	135.805	999.154	580.174	-2.58357	2.10526e-06	1.97539e-05	TNFAIP2	14	103123442	103137439	+	5029	protein_coding	TNF alpha induced protein 2 [Source:HGNC Symbol;Acc:HGNC:11895]	-	167	159	718	556	0.93571	0.991375	7.21766	4.22174
ENSG00000130202	1696.75	1709.94	13874	6514.43	-2.58125	2.13549e-06	2.00191e-05	NECTIN2	19	44846175	44889228	+	3747	protein_coding	nectin cell adhesion molecule 2 [Source:HGNC Symbol;Acc:HGNC:9707]	V-set	2221	2002	9970	6243	16.7021	16.7534	134.513	63.6222
ENSG00000217275	0.763957	0	90.4526	69.913	-7.63701	2.16188e-06	2.02415e-05	AL031777.1	6	26202156	26202654	+	499	processed_pseudogene	-	-	1	0	65	67	0.0564685	0	6.58516	5.12712
ENSG00000101255	605.818	666.211	6038.06	2358.26	-2.72249	2.16845e-06	2.02905e-05	TRIB3	20	362835	397559	+	3434	protein_coding	tribbles pseudokinase 3 [Source:HGNC Symbol;Acc:HGNC:16228]	-	793	780	4339	2260	6.50698	7.12224	63.8768	25.1308
novel.493	237.59	251.964	1828.53	1019.48	-2.5401	2.18298e-06	2.04183e-05	-	CHR_HSCHR19_2_CTG3_1	34359563	34391124	+	2478	-	PF00342:Phosphoglucose isomerase	-	311	295	1314	977	3.53643	3.73287	26.807	15.0554
ENSG00000080709	1.52791	0	84.8863	40.6956	-6.29763	2.20444e-06	2.06109e-05	KCNN2	5	114360945	114496500	+	3864	protein_coding	potassium calcium-activated channel subfamily N member 2 [Source:HGNC Symbol;Acc:HGNC:6291]	Ion_trans_2	2	0	61	39	0.0145848	0	0.79808	0.385413
ENSG00000263968	13.7512	5.97882	97.4105	131.478	-3.52908	2.21958e-06	2.07442e-05	RN7SL381P	16	85659378	85659675	+	298	misc_RNA	RNA, 7SL, cytoplasmic 381, pseudogene [Source:HGNC Symbol;Acc:HGNC:46397]	-	18	7	70	126	1.70201	0.736554	11.8751	16.1456
ENSG00000167780	0	0	48.7053	35.4783	-8.14395	2.22926e-06	2.08181e-05	SOAT2	12	53103518	53124538	+	2044	protein_coding	sterol O-acyltransferase 2 [Source:HGNC Symbol;Acc:HGNC:11178]	MBOAT	0	0	35	34	0	0	0.865647	0.63518
ENSG00000198429	0	0	22.2653	67.8261	-8.24985	2.23254e-06	2.08406e-05	ZNF69	19	11887784	11914329	+	2931	protein_coding	zinc finger protein 69 [Source:HGNC Symbol;Acc:HGNC:13138]	KRAB	0	0	16	65	0	0	0.275967	0.84683
ENSG00000126903	506.503	514.178	4430.79	1945.04	-2.64288	2.23347e-06	2.0841e-05	SLC10A3	X	154487306	154490690	-	2247	protein_coding	solute carrier family 10 member 3 [Source:HGNC Symbol;Acc:HGNC:22979]	-	663	602	3184	1864	8.31413	8.40071	71.6347	31.6768
ENSG00000260121	20.6268	5.97882	115.501	193.043	-3.52829	2.24314e-06	2.0923e-05	AC138028.4	16	88718615	88720459	+	1845	antisense	-	-	27	7	83	185	0.412357	0.118966	2.27424	3.8289
novel.123	33.6141	43.5599	300.581	227.478	-2.77493	2.2569e-06	2.1043e-05	-	20	45926577	45934612	-	6809	-	-	-	44	51	216	218	0.182086	0.23486	1.6037	1.22257
ENSG00000227051	1041.27	999.316	5752.79	4505.74	-2.3297	2.25931e-06	2.10571e-05	C14orf132	14	96039324	96093889	+	7775	protein_coding	chromosome 14 open reading frame 132 [Source:HGNC Symbol;Acc:HGNC:20346]	-	1363	1170	4134	4318	4.93971	4.71854	26.8797	21.2071
ENSG00000124496	446.915	400.581	2746.98	1810.43	-2.42669	2.26539e-06	2.11055e-05	TRERF1	6	42224931	42452051	-	7732	protein_coding	transcriptional regulating factor 1 [Source:HGNC Symbol;Acc:HGNC:18273]	ELM2	585	469	1974	1735	2.13192	1.90197	12.9065	8.56853
ENSG00000149115	1485.13	1370	13239.5	5236.17	-2.69391	2.27176e-06	2.11565e-05	TNKS1BP1	11	57299638	57324952	-	7149	protein_coding	tankyrase 1 binding protein 1 [Source:HGNC Symbol;Acc:HGNC:19081]	-	1944	1604	9514	5018	7.66227	7.03528	67.2778	26.803
ENSG00000248429	0	0	29.2232	56.3478	-8.17379	2.28015e-06	2.12262e-05	FAM198B-AS1	4	158170752	158202877	+	5639	antisense	FAM198B antisense RNA 1 [Source:HGNC Symbol;Acc:HGNC:53132]	-	0	0	21	54	0	0	0.188266	0.365671
ENSG00000204950	16.0431	11.1035	162.815	103.304	-3.28782	2.2814e-06	2.12295e-05	LRRC10B	11	61508800	61511018	+	2219	protein_coding	leucine rich repeat containing 10B [Source:HGNC Symbol;Acc:HGNC:37215]	-	21	13	117	99	0.266666	0.1837	2.66552	1.70364
ENSG00000184388	0	0	43.1389	39.6522	-8.12145	2.37114e-06	2.20012e-05	PABPC1L2B	X	73003517	73005713	+	2197	protein_coding	poly(A) binding protein cytoplasmic 1 like 2B [Source:HGNC Symbol;Acc:HGNC:31852]	RRM_1	0	0	31	38	0	0	0.713322	0.660469
ENSG00000234967	0	0	33.3979	50.0869	-8.13677	2.39455e-06	2.2195e-05	AL357558.2	20	47950799	47952055	+	425	lincRNA	-	-	0	0	24	48	0	0	2.8548	4.31272
ENSG00000126458	107.718	109.327	1116.05	427.826	-2.82966	2.39889e-06	2.2221e-05	RRAS	19	49635292	49640201	-	1160	protein_coding	RAS related [Source:HGNC Symbol;Acc:HGNC:10447]	Ras	141	128	802	410	3.42505	3.45999	34.9518	13.4966
ENSG00000277476	31.3222	42.7058	357.636	194.087	-2.89766	2.39924e-06	2.2221e-05	AC005332.6	17	68133201	68135935	+	2735	lincRNA	-	-	41	50	257	186	0.422409	0.573238	4.75039	2.5969
ENSG00000126262	0	0	52.88	31.3043	-8.14268	2.41837e-06	2.23718e-05	FFAR2	19	35443907	35451767	+	2149	protein_coding	free fatty acid receptor 2 [Source:HGNC Symbol;Acc:HGNC:4501]	-	0	0	38	30	0	0	0.893925	0.533069
ENSG00000172216	488.932	527.844	2478.4	2571.13	-2.31221	2.42348e-06	2.24103e-05	CEBPB	20	50190734	50192689	+	1956	protein_coding	CCAAT/enhancer binding protein beta [Source:HGNC Symbol;Acc:HGNC:1834]	bZIP_2	640	618	1781	2464	9.21972	9.907	46.0308	48.1028
ENSG00000223396	0	0	37.5726	44.8696	-8.11716	2.45381e-06	2.26641e-05	RPS10P7	1	201518703	201530474	+	2329	transcribed_processed_pseudogene	ribosomal protein S10 pseudogene 7 [Source:HGNC Symbol;Acc:HGNC:36423]	-	0	0	27	43	0	0	0.586068	0.705014
ENSG00000117407	80.2154	68.3293	641.518	334.956	-2.71522	2.52094e-06	2.32478e-05	ARTN	1	43933320	43937241	+	2658	protein_coding	artemin [Source:HGNC Symbol;Acc:HGNC:727]	-	105	80	461	321	1.11312	0.943751	8.76798	4.61157
ENSG00000182685	86.3271	95.6611	868.345	377.739	-2.77473	2.52726e-06	2.3297e-05	BRICD5	16	2209253	2211950	-	2083	protein_coding	BRICHOS domain containing 5 [Source:HGNC Symbol;Acc:HGNC:28309]	-	113	112	624	362	1.52861	1.68598	15.1443	6.63618
novel.119	0	0	44.5305	37.5652	-8.10869	2.53428e-06	2.33526e-05	-	20	61153370	61168165	+	756	-	-	-	0	0	32	36	0	0	2.13984	1.81836
ENSG00000273702	28.2664	29.8941	194.821	216	-2.82113	2.55444e-06	2.35292e-05	AC091271.1	17	59618553	59619714	-	1162	lincRNA	-	-	37	35	140	207	0.897226	0.944462	6.09082	6.80241
ENSG00000187957	0	1.70823	70.9705	48	-6.18129	2.5868e-06	2.37994e-05	DNER	2	229357629	229714558	-	3935	protein_coding	delta/notch like EGF repeat containing [Source:HGNC Symbol;Acc:HGNC:24456]	EGF	0	2	51	46	0	0.015937	0.655208	0.446387
ENSG00000141524	457.61	444.995	4647.87	1605.91	-2.79232	2.59261e-06	2.38435e-05	TMC6	17	78110458	78132407	-	8669	protein_coding	transmembrane channel like 6 [Source:HGNC Symbol;Acc:HGNC:18021]	-	599	521	3340	1539	1.94699	1.88448	19.4774	6.77904
ENSG00000169896	0.763957	0.854117	64.0126	50.0869	-6.14166	2.59878e-06	2.3891e-05	ITGAM	16	31259990	31332892	+	5665	protein_coding	integrin subunit alpha M [Source:HGNC Symbol;Acc:HGNC:6149]	VWA	1	1	46	48	0.00497401	0.00553506	0.410499	0.323549
ENSG00000185201	217.728	204.988	2482.58	738.782	-2.92941	2.62722e-06	2.41148e-05	IFITM2	11	307631	315272	+	1543	protein_coding	interferon induced transmembrane protein 2 [Source:HGNC Symbol;Acc:HGNC:5413]	-	285	240	1784	708	5.20458	4.87717	58.4497	17.5213
ENSG00000067057	1682.23	1541.68	15973.9	5688	-2.7482	2.64133e-06	2.42255e-05	PFKP	10	3066333	3137712	+	4836	protein_coding	phosphofructokinase, platelet [Source:HGNC Symbol;Acc:HGNC:8878]	PFK	2202	1805	11479	5451	12.8303	11.7034	119.997	43.0416
ENSG00000162891	0	0	37.5726	43.8261	-8.09863	2.65835e-06	2.43722e-05	IL20	1	206865354	206869223	+	1567	protein_coding	interleukin 20 [Source:HGNC Symbol;Acc:HGNC:6002]	-	0	0	27	42	0	0	0.871061	1.02348
ENSG00000105707	2.29187	3.41647	93.2358	40.6956	-4.55537	2.71742e-06	2.48829e-05	HPN	19	35040506	35066571	+	3380	protein_coding	hepsin [Source:HGNC Symbol;Acc:HGNC:5155]	Trypsin	3	4	67	39	0.0250098	0.0371079	1.0021	0.440602
ENSG00000106789	201.685	180.219	1150.84	878.608	-2.40939	2.7947e-06	2.5533e-05	CORO2A	9	98120975	98192640	-	5717	protein_coding	coronin 2A [Source:HGNC Symbol;Acc:HGNC:2255]	-	264	211	827	842	1.30119	1.15728	7.31292	5.62397
ENSG00000187122	146.68	140.929	1564.13	529.043	-2.8628	2.79994e-06	2.55709e-05	SLIT1	10	96998038	97185920	-	9103	protein_coding	slit guidance ligand 1 [Source:HGNC Symbol;Acc:HGNC:11085]	Laminin_G_2	192	165	1124	507	0.594324	0.568358	6.24217	2.12678
novel.647	0.763957	0	45.9221	116.87	-7.66477	2.81299e-06	2.56802e-05	-	CHR_HSCHR6_MHC_QBL_CTG1	30897741	30898747	+	377	-	-	-	1	0	33	112	0.0747421	0	4.42513	11.3442
ENSG00000178038	80.9794	79.4328	876.695	315.13	-2.89217	2.84522e-06	2.59244e-05	ALS2CL	3	46668997	46693704	-	9057	protein_coding	ALS2 C-terminal like [Source:HGNC Symbol;Acc:HGNC:20605]	VPS9	106	93	630	302	0.329783	0.321974	3.51649	1.27327
ENSG00000167554	0	0.854117	48.7053	111.652	-7.63226	2.85415e-06	2.59957e-05	ZNF610	19	52336245	52367778	+	3546	protein_coding	zinc finger protein 610 [Source:HGNC Symbol;Acc:HGNC:26687]	KRAB	0	1	35	107	0	0.00884268	0.49898	1.15224
ENSG00000198021	0	0	22.2653	63.6522	-8.18131	2.8628e-06	2.60644e-05	SPANXA1	X	141583674	141585011	-	691	protein_coding	sperm protein associated with the nucleus, X-linked, family member A1 [Source:HGNC Symbol;Acc:HGNC:11218]	-	0	0	16	61	0	0	1.17057	3.37094
ENSG00000275342	19.0989	28.1858	257.442	136.696	-3.05962	2.86765e-06	2.60884e-05	PRAG1	8	8317736	8386498	-	4904	protein_coding	PEAK1 related, kinase-activating pseudokinase 1 [Source:HGNC Symbol;Acc:HGNC:25438]	Pkinase	25	33	185	131	0.143647	0.211002	1.90711	1.02005
ENSG00000181788	679.921	733.686	3366.23	3514.43	-2.28321	2.87888e-06	2.61805e-05	SIAH2	3	150741127	150763477	-	2617	protein_coding	siah E3 ubiquitin protein ligase 2 [Source:HGNC Symbol;Acc:HGNC:10858]	-	890	859	2419	3368	9.58281	10.2923	46.7289	49.1436
ENSG00000106078	194.809	197.301	1267.73	857.739	-2.43811	2.88454e-06	2.62118e-05	COBL	7	51016212	51316818	-	14349	protein_coding	cordon-bleu WH2 repeat protein [Source:HGNC Symbol;Acc:HGNC:22199]	-	255	231	911	822	0.500755	0.504793	3.2096	2.1875
ENSG00000272419	48.1293	39.2894	314.497	250.435	-2.69049	2.91103e-06	2.64321e-05	AC241585.2	1	145164099	145216058	-	6056	transcribed_unprocessed_pseudogene	-	-	63	46	226	240	0.293131	0.238174	1.88658	1.5133
ENSG00000103150	181.822	212.675	1533.52	805.565	-2.56757	2.91243e-06	2.64347e-05	MLYCD	16	83899126	83927026	+	16161	protein_coding	malonyl-CoA decarboxylase [Source:HGNC Symbol;Acc:HGNC:7150]	-	238	249	1102	772	0.414969	0.483119	3.4472	1.8241
novel.34	0	0	52.88	29.2174	-8.10604	2.94077e-06	2.66509e-05	-	10	81873403	81875228	-	979	-	-	-	0	0	38	28	0	0	1.96225	1.09213
ENSG00000224271	0	0	48.7053	32.3478	-8.08866	2.94499e-06	2.66789e-05	AL117329.1	22	47631674	47855600	+	2276	lincRNA	-	-	0	0	35	31	0	0	0.777409	0.520102
ENSG00000140416	1132.95	1158.18	5043.08	6138.78	-2.28707	2.96735e-06	2.68609e-05	TPM1	15	63042632	63071915	+	12876	protein_coding	tropomyosin 1 [Source:HGNC Symbol;Acc:HGNC:12010]	-	1483	1356	3624	5883	3.24539	3.30218	14.2286	17.4468
ENSG00000123609	13.7512	17.9364	83.4947	253.565	-3.41615	2.99141e-06	2.70683e-05	NMI	2	151270465	151290057	-	3480	protein_coding	N-myc and STAT interactor [Source:HGNC Symbol;Acc:HGNC:7854]	-	18	21	60	243	0.145747	0.189218	0.871617	2.6664
ENSG00000162066	500.392	477.451	6331.68	1557.91	-3.01207	2.99424e-06	2.70835e-05	AMDHD2	16	2520357	2531422	+	4366	protein_coding	amidohydrolase domain containing 2 [Source:HGNC Symbol;Acc:HGNC:24262]	Amidohydro_1	655	559	4550	1493	4.22731	4.01468	52.6843	13.0579
novel.508	51.949	64.9129	491.227	277.565	-2.71737	3.04373e-06	2.74995e-05	-	CHR_HSCHR1_4_CTG3	23565352	23567029	-	1052	-	PF00010:Helix-loop-helix DNA-binding domain	HLH	68	76	353	266	1.82138	2.26527	16.9634	9.65528
ENSG00000260001	18.335	18.7906	263.008	97.0434	-3.27494	3.10087e-06	2.79837e-05	TGFBR3L	19	7916145	7919097	+	1516	protein_coding	transforming growth factor beta receptor 3 like [Source:HGNC Symbol;Acc:HGNC:44152]	Zona_pellucida	24	22	189	93	0.446086	0.455036	6.30255	2.34252
ENSG00000204860	71.048	67.4752	524.625	326.609	-2.61834	3.1639e-06	2.85307e-05	FAM201A	9	38620474	38624990	+	3847	antisense	family with sequence similarity 201 member A [Source:HGNC Symbol;Acc:HGNC:27239]	-	93	79	377	313	0.681188	0.643913	4.95419	3.10685
ENSG00000130429	38.9618	37.5811	332.587	198.261	-2.79233	3.1704e-06	2.85784e-05	ARPC1B	7	99374249	99394814	+	3986	protein_coding	actin related protein 2/3 complex subunit 1B [Source:HGNC Symbol;Acc:HGNC:704]	-	51	44	239	190	0.360528	0.346129	3.0312	1.82018
ENSG00000244405	9.93143	13.6659	86.2779	155.478	-3.36266	3.23895e-06	2.91629e-05	ETV5	3	186046308	186110318	-	5802	protein_coding	ETS variant 5 [Source:HGNC Symbol;Acc:HGNC:3494]	ETS_PEA3_N	13	16	62	149	0.0631353	0.0864699	0.540216	0.980635
ENSG00000196935	239.118	268.193	1255.2	1294.96	-2.32979	3.24239e-06	2.91828e-05	SRGAP1	12	63844293	64162221	+	26641	protein_coding	SLIT-ROBO Rho GTPase activating protein 1 [Source:HGNC Symbol;Acc:HGNC:17382]	RhoGAP	313	314	902	1241	0.331055	0.369574	1.71163	1.77877
ENSG00000134107	298.707	273.317	1682.42	1258.43	-2.36181	3.30213e-06	2.96751e-05	BHLHE40	3	4979116	4985323	+	3837	protein_coding	basic helix-loop-helix family member e40 [Source:HGNC Symbol;Acc:HGNC:1046]	HLH	391	320	1209	1206	2.87138	2.61505	15.929	12.002
ENSG00000283283	3.05583	2.56235	93.2358	38.6087	-4.54428	3.30545e-06	2.96937e-05	AC013268.4	2	110022447	110050064	-	3634	unprocessed_pseudogene	-	-	4	3	67	37	0.0310157	0.0258856	0.932059	0.38879
ENSG00000167680	168.834	178.51	2045.62	596.869	-2.92696	3.30762e-06	2.97019e-05	SEMA6B	19	4542593	4559808	-	4412	protein_coding	semaphorin 6B [Source:HGNC Symbol;Acc:HGNC:10739]	Sema	221	209	1470	572	1.41144	1.48537	16.8436	4.95062
ENSG00000285094	0	0	55.6632	26.0869	-8.09905	3.3123e-06	2.97213e-05	AP000439.5	11	69481662	69494952	+	4902	lincRNA	-	-	0	0	40	25	0	0	0.412516	0.194745
ENSG00000109321	9.93143	5.1247	76.5368	111.652	-3.63775	3.33187e-06	2.98856e-05	AREG	4	74445134	74455009	+	1648	protein_coding	amphiregulin [Source:HGNC Symbol;Acc:HGNC:651]	-	13	6	55	107	0.222276	0.114161	1.68717	2.47928
ENSG00000168386	25.9745	12.8117	118.284	246.261	-3.23019	3.36036e-06	3.01297e-05	FILIP1L	3	99830141	100114513	-	5903	protein_coding	filamin A interacting protein 1 like [Source:HGNC Symbol;Acc:HGNC:24589]	-	34	15	85	236	0.162298	0.0796785	0.727947	1.52664
ENSG00000134248	525.602	511.616	3193.67	2144.35	-2.36342	3.37421e-06	3.02194e-05	LAMTOR5	1	110401249	110407942	-	2388	protein_coding	late endosomal/lysosomal adaptor, MAPK and MTOR activator 5 [Source:HGNC Symbol;Acc:HGNC:17955]	-	688	599	2295	2055	8.11821	7.8653	48.585	32.8607
ENSG00000123342	0.763957	0	94.6274	56.3478	-7.54883	3.38032e-06	3.02512e-05	MMP19	12	55835433	55842966	-	4672	protein_coding	matrix metallopeptidase 19 [Source:HGNC Symbol;Acc:HGNC:7165]	-	1	0	68	54	0.0060312	0	0.7358	0.441357
ENSG00000118156	0	0	37.5726	40.6956	-8.04155	3.40972e-06	3.04912e-05	ZNF541	19	47520685	47555856	-	4655	protein_coding	zinc finger protein 541 [Source:HGNC Symbol;Acc:HGNC:25294]	ELM2	0	0	27	39	0	0	0.293223	0.319922
ENSG00000155366	1032.11	1113.77	6977.38	4257.39	-2.38827	3.42349e-06	3.05759e-05	RHOC	1	112701106	112707434	-	4028	protein_coding	ras homolog family member C [Source:HGNC Symbol;Acc:HGNC:669]	Ras	1351	1304	5014	4080	9.45088	10.151	62.9287	38.6785
ENSG00000249326	0	0	41.7474	36.5217	-8.04006	3.43912e-06	3.06843e-05	AC025183.2	5	1887332	1900493	+	1635	antisense	-	-	0	0	30	35	0	0	0.927592	0.817427
ENSG00000100985	2.29187	4.27058	90.4526	44.8696	-4.37314	3.46564e-06	3.09093e-05	MMP9	20	46008908	46016561	+	2336	protein_coding	matrix metallopeptidase 9 [Source:HGNC Symbol;Acc:HGNC:7176]	Hemopexin	3	5	65	43	0.0361872	0.067115	1.40668	0.702901
ENSG00000149177	559.216	562.863	3165.84	2403.13	-2.31114	3.51468e-06	3.13348e-05	PTPRJ	11	47980558	48170841	+	9620	protein_coding	protein tyrosine phosphatase, receptor type J [Source:HGNC Symbol;Acc:HGNC:9673]	Y_phosphatase	732	659	2275	2303	2.14409	2.14799	11.9553	9.1415
ENSG00000055813	0.763957	3.41647	75.1453	44.8696	-4.86865	3.58843e-06	3.19561e-05	CCDC85A	2	56184123	56386173	+	3982	protein_coding	coiled-coil domain containing 85A [Source:HGNC Symbol;Acc:HGNC:29400]	-	1	4	54	43	0.00707628	0.0314979	0.685561	0.41235
ENSG00000177096	2.29187	1.70823	82.1032	36.5217	-4.87894	3.60964e-06	3.21329e-05	FAM109B	22	42074251	42079441	+	2451	protein_coding	family with sequence similarity 109 member B [Source:HGNC Symbol;Acc:HGNC:27161]	PH	3	2	59	35	0.0344893	0.0255864	1.21692	0.545285
ENSG00000196924	29353.5	30088.8	301191	99218.1	-2.75191	3.67325e-06	3.26499e-05	FLNA	X	154348524	154374638	-	10585	protein_coding	filamin A [Source:HGNC Symbol;Acc:HGNC:3754]	CH	38423	35228	216438	95084	102.284	104.357	1033.7	343.017
ENSG00000007255	148.972	134.096	1200.93	559.304	-2.63572	3.68547e-06	3.27462e-05	TRAPPC6A	19	45162928	45178237	-	933	protein_coding	trafficking protein particle complex 6A [Source:HGNC Symbol;Acc:HGNC:23069]	TRAPP_Bet3	195	157	863	536	5.88924	5.27644	46.7609	21.9372
ENSG00000145623	315.514	287.837	1305.3	1776	-2.35259	3.6963e-06	3.28177e-05	OSMR	5	38845858	38945596	+	7174	protein_coding	oncostatin M receptor [Source:HGNC Symbol;Acc:HGNC:8507]	-	413	337	938	1702	1.62217	1.47296	6.6099	9.05935
ENSG00000067836	458.374	407.414	4579.69	1471.3	-2.80479	3.71348e-06	3.29454e-05	ROGDI	16	4796968	4802950	-	3683	protein_coding	rogdi homolog [Source:HGNC Symbol;Acc:HGNC:29478]	-	600	477	3291	1410	4.59046	4.06106	45.1731	14.619
ENSG00000203865	16.807	9.39528	148.899	104.348	-3.26589	3.77242e-06	3.34558e-05	ATP1A1-AS1	1	116392247	116418622	-	2458	processed_transcript	ATP1A1 antisense RNA 1 [Source:HGNC Symbol;Acc:HGNC:28262]	-	22	11	107	100	0.252201	0.140324	2.20067	1.55352
ENSG00000014216	2898.45	2961.22	27878.9	10008	-2.69277	3.78108e-06	3.35199e-05	CAPN1	11	65180566	65212006	+	7553	protein_coding	calpain 1 [Source:HGNC Symbol;Acc:HGNC:1476]	Peptidase_C2	3794	3467	20034	9591	14.1542	14.3932	134.092	48.489
ENSG00000164035	0	1.70823	51.4884	60.5217	-6.09745	3.79262e-06	3.35971e-05	EMCN	4	100395341	100880126	-	5243	protein_coding	endomucin [Source:HGNC Symbol;Acc:HGNC:16041]	-	0	2	37	58	0	0.0119611	0.35676	0.422422
ENSG00000110080	624.152	661.94	4682.66	2445.91	-2.47048	3.83851e-06	3.39909e-05	ST3GAL4	11	126355640	126440344	+	4465	protein_coding	ST3 beta-galactoside alpha-2,3-sialyltransferase 4 [Source:HGNC Symbol;Acc:HGNC:10864]	Glyco_transf_29	817	775	3365	2344	5.15593	5.44256	38.0993	20.0463
ENSG00000112659	450.734	402.289	3615.32	1564.17	-2.60185	3.86731e-06	3.4233e-05	CUL9	6	43182175	43224587	+	12251	protein_coding	cullin 9 [Source:HGNC Symbol;Acc:HGNC:15982]	Cullin	590	471	2598	1499	1.35702	1.20551	10.7207	4.67228
ENSG00000198855	69.52	60.6423	480.095	310.956	-2.60211	3.8762e-06	3.42988e-05	FICD	12	108515185	108525837	+	4267	protein_coding	FIC domain containing [Source:HGNC Symbol;Acc:HGNC:18416]	-	91	71	345	298	0.600932	0.521745	4.08743	2.66681
ENSG00000219507	55.7688	47.8305	833.556	172.174	-3.27737	3.91277e-06	3.46095e-05	FTH1P8	X	148052233	148052746	+	514	processed_pseudogene	ferritin heavy chain 1 pseudogene 8 [Source:HGNC Symbol;Acc:HGNC:3995]	-	73	56	599	165	4.0019	3.41623	58.9139	12.258
ENSG00000205634	0	0	69.5789	16.6956	-8.1746	3.9286e-06	3.47235e-05	LINC00898	22	47621043	47631569	-	4314	lincRNA	long intergenic non-protein coding RNA 898 [Source:HGNC Symbol;Acc:HGNC:48581]	-	0	0	50	16	0	0	0.585927	0.141625
ENSG00000121900	378.158	415.955	4338.94	1324.17	-2.83396	3.948e-06	3.48818e-05	TMEM54	1	32894594	32901438	-	1417	protein_coding	transmembrane protein 54 [Source:HGNC Symbol;Acc:HGNC:24143]	-	495	487	3118	1269	9.84332	10.7766	111.24	34.1972
ENSG00000174827	17.571	32.4564	146.116	262.956	-3.03686	4.00947e-06	3.53324e-05	PDZK1	1	145670852	145708148	-	2480	protein_coding	PDZ domain containing 1 [Source:HGNC Symbol;Acc:HGNC:8821]	PDZ	23	38	105	252	0.261326	0.480457	2.14038	3.88014
novel.655	15.2791	15.3741	115.501	146.087	-3.09439	4.01138e-06	3.53361e-05	-	CHR_HSCHR6_MHC_QBL_CTG1	31807308	31820742	+	1594	-	PF00012:Hsp70 protein|PF10712:NAD-specific glutamate dehydrogenase	HSP70	20	18	83	140	0.353548	0.354084	2.63235	3.35381
ENSG00000168754	5.3477	2.56235	93.2358	50.0869	-4.1641	4.0207e-06	3.54037e-05	FAM178B	2	96875882	96986592	-	3545	protein_coding	family with sequence similarity 178 member B [Source:HGNC Symbol;Acc:HGNC:28036]	-	7	3	67	48	0.0556401	0.0265355	0.955459	0.51704
ENSG00000185736	0	0	73.7537	14.6087	-8.20885	4.02206e-06	3.54037e-05	ADARB2	10	1177318	1737476	-	10513	protein_coding	adenosine deaminase, RNA specific B2 (inactive) [Source:HGNC Symbol;Acc:HGNC:227]	-	0	0	53	14	0	0	0.254861	0.0508511
ENSG00000189067	1064.96	1024.09	4752.24	5107.82	-2.23876	4.03628e-06	3.55157e-05	LITAF	16	11547722	11636381	-	5060	protein_coding	lipopolysaccharide induced TNF factor [Source:HGNC Symbol;Acc:HGNC:16841]	-	1394	1199	3415	4895	7.7628	7.43004	34.1188	36.9403
ENSG00000251348	4.58374	4.27058	41.7474	113.739	-4.13806	4.04118e-06	3.55456e-05	HSPD1P11	5	95768999	95770700	+	1702	processed_pseudogene	heat shock protein family D (Hsp60) member 1 pseudogene 11 [Source:HGNC Symbol;Acc:HGNC:35142]	-	6	5	30	109	0.099334	0.0921156	0.891077	2.44549
ENSG00000177303	1115.38	1069.35	10397.9	3733.56	-2.69327	4.04973e-06	3.56075e-05	CASKIN2	17	75500261	75515583	-	5823	protein_coding	CASK interacting protein 2 [Source:HGNC Symbol;Acc:HGNC:18200]	SAM_1	1460	1252	7472	3578	7.06501	6.74187	64.87	23.4635
ENSG00000262152	1.52791	1.70823	76.5368	35.4783	-5.11128	4.05576e-06	3.56472e-05	LINC00514	16	2988961	2994509	+	4284	processed_transcript	long intergenic non-protein coding RNA 514 [Source:HGNC Symbol;Acc:HGNC:27549]	-	2	2	55	34	0.0131549	0.0146387	0.649033	0.30306
ENSG00000177694	16.0431	18.7906	87.6695	256.696	-3.30961	4.11548e-06	3.61183e-05	NAALADL2	3	174438573	175810552	+	13592	protein_coding	N-acetylated alpha-linked acidic dipeptidase like 2 [Source:HGNC Symbol;Acc:HGNC:23219]	-	21	22	63	246	0.0435354	0.050753	0.234321	0.691115
ENSG00000234869	10.6954	8.54117	125.242	80.3478	-3.41298	4.14913e-06	3.63866e-05	AL021392.1	22	46541495	46548196	+	2949	antisense	-	-	14	10	90	77	0.13377	0.106328	1.54284	0.997045
ENSG00000185187	484.348	409.122	3942.34	1609.04	-2.63504	4.1636e-06	3.64999e-05	SIGIRR	11	405716	417455	-	3496	protein_coding	single Ig and TIR domain containing [Source:HGNC Symbol;Acc:HGNC:30575]	-	634	479	2833	1542	5.11004	4.29622	40.9665	16.8427
ENSG00000175662	873.202	930.987	7474.17	3233.74	-2.56915	4.18145e-06	3.66428e-05	TOM1L2	17	17843511	17972422	-	7863	protein_coding	target of myb1 like 2 membrane trafficking protein [Source:HGNC Symbol;Acc:HGNC:11984]	-	1143	1090	5371	3099	4.09604	4.34671	34.5319	15.0498
ENSG00000144645	216.2	236.59	1182.84	1070.61	-2.31524	4.23182e-06	3.70704e-05	OSBPL10	3	31657890	32077580	-	11976	protein_coding	oxysterol binding protein like 10 [Source:HGNC Symbol;Acc:HGNC:16395]	-	283	277	850	1026	0.665857	0.725255	3.58807	3.27141
ENSG00000099625	178.766	164.844	1654.59	624	-2.72861	4.24908e-06	3.72078e-05	CBARP	19	1228287	1238027	-	4543	protein_coding	CACN beta subunit associated regulatory protein [Source:HGNC Symbol;Acc:HGNC:28617]	-	234	193	1189	598	1.45137	1.3321	13.231	5.0264
ENSG00000121101	61.1165	74.3081	374.335	397.565	-2.5117	4.25711e-06	3.72643e-05	TEX14	17	58556678	58692055	-	5325	protein_coding	testis expressed 14, intercellular bridge forming factor [Source:HGNC Symbol;Acc:HGNC:11737]	Pkinase_Tyr	80	87	269	381	0.423328	0.512297	2.5538	2.73215
ENSG00000147535	113.83	82.8493	551.065	530.087	-2.45785	4.40922e-06	3.85243e-05	PLPP5	8	38263130	38269243	-	4102	protein_coding	phospholipid phosphatase 5 [Source:HGNC Symbol;Acc:HGNC:25026]	-	149	97	396	508	1.02352	0.741479	4.88038	4.72897
ENSG00000047457	2.29187	1.70823	33.3979	84.5217	-4.88041	4.41262e-06	3.85321e-05	CP	3	149162410	149222055	-	7296	protein_coding	ceruloplasmin [Source:HGNC Symbol;Acc:HGNC:2295]	-	3	2	24	81	0.0115862	0.00859543	0.166295	0.423935
ENSG00000170006	19.0989	16.2282	107.152	196.174	-3.10318	4.41956e-06	3.85719e-05	TMEM154	4	152618632	152680165	-	11587	protein_coding	transmembrane protein 154 [Source:HGNC Symbol;Acc:HGNC:26489]	-	25	19	77	188	0.0607961	0.0514168	0.335949	0.619563
ENSG00000207611	2.29187	2.56235	87.6695	35.4783	-4.66217	4.45806e-06	3.88792e-05	MIR149	2	240456001	240456089	+	89	miRNA	microRNA 149 [Source:HGNC Symbol;Acc:HGNC:31536]	-	3	3	63	34	0.949812	1.05695	35.7853	14.5877
ENSG00000165233	355.24	381.79	4254.06	1182.26	-2.88259	4.51963e-06	3.9387e-05	CARD19	9	93096218	93113283	+	3081	protein_coding	caspase recruitment domain family member 19 [Source:HGNC Symbol;Acc:HGNC:28148]	-	465	447	3057	1133	4.25273	4.54924	50.16	14.0423
ENSG00000166289	91.6748	92.2446	887.827	353.739	-2.754	4.52744e-06	3.94259e-05	PLEKHF1	19	29665056	29675457	+	2681	protein_coding	pleckstrin homology and FYVE domain containing 1 [Source:HGNC Symbol;Acc:HGNC:20764]	FYVE	120	108	638	339	1.26122	1.26313	12.0303	4.82838
ENSG00000138172	126.817	105.91	1113.26	439.304	-2.73682	4.6436e-06	4.0396e-05	CALHM2	10	103446786	103452402	-	3108	protein_coding	calcium homeostasis modulator family member 2 [Source:HGNC Symbol;Acc:HGNC:23493]	-	166	124	800	421	1.50499	1.25102	13.0126	5.17249
ENSG00000158246	48.1293	35.0188	571.939	159.652	-3.13444	4.64396e-06	4.0396e-05	FAM46B	1	27005020	27012836	-	2368	protein_coding	family with sequence similarity 46 member B [Source:HGNC Symbol;Acc:HGNC:28273]	-	63	41	411	153	0.749662	0.542906	8.77433	2.46722
ENSG00000143878	3521.84	3886.23	25975.2	13724.9	-2.42195	4.64832e-06	4.0419e-05	RHOB	2	20447074	20449445	+	2372	protein_coding	ras homolog family member B [Source:HGNC Symbol;Acc:HGNC:668]	Ras	4610	4550	18666	13153	54.7637	60.1477	397.823	211.743
ENSG00000050438	102.37	115.306	523.234	635.478	-2.41285	4.72873e-06	4.10789e-05	SLC4A8	12	51391317	51515763	+	17980	protein_coding	solute carrier family 4 member 8 [Source:HGNC Symbol;Acc:HGNC:11034]	Band_3_cyto	134	135	376	609	0.210001	0.235433	1.05719	1.29338
novel.8	0	0	38.9642	35.4783	-7.96802	4.73487e-06	4.11058e-05	-	1	144152661	144157439	+	1069	-	-	-	0	0	28	34	0	0	1.32414	1.21451
ENSG00000272106	50.4211	40.1435	250.484	310.956	-2.63176	4.73601e-06	4.11058e-05	AL691432.2	1	1613758	1615795	-	2038	antisense	-	-	66	47	180	298	0.912528	0.72313	4.46501	5.58356
ENSG00000169429	3.05583	2.56235	23.6568	126.261	-4.7408	4.73955e-06	4.11213e-05	CXCL8	4	73740506	73743716	+	2274	protein_coding	C-X-C motif chemokine ligand 8 [Source:HGNC Symbol;Acc:HGNC:6025]	-	4	3	17	121	0.0495651	0.0413669	0.377931	2.03186
ENSG00000123364	444.623	394.602	2015.01	1997.22	-2.25719	4.81345e-06	4.17012e-05	HOXC13	12	53938765	53946544	+	2423	protein_coding	homeobox C13 [Source:HGNC Symbol;Acc:HGNC:5125]	Homeobox	582	462	1448	1914	6.76824	5.97876	30.2113	30.1639
ENSG00000183145	32.8501	30.7482	193.429	227.478	-2.72667	4.85958e-06	4.20238e-05	RIPPLY3	21	37006150	37019659	+	2319	protein_coding	ripply transcriptional repressor 3 [Source:HGNC Symbol;Acc:HGNC:3047]	-	43	36	139	218	0.522485	0.486771	3.03018	3.58967
ENSG00000178719	3516.49	3496.75	28434.1	12275.5	-2.53718	4.88261e-06	4.22075e-05	GRINA	8	143990058	143993415	+	2527	protein_coding	glutamate ionotropic receptor NMDA type subunit associated protein 1 [Source:HGNC Symbol;Acc:HGNC:4589]	-	4603	4094	20433	11764	51.3266	50.8002	408.771	177.766
ENSG00000170542	3.81978	2.56235	48.7053	76.1739	-4.28584	4.9029e-06	4.23674e-05	SERPINB9	6	2887266	2903280	-	4118	protein_coding	serpin family B member 9 [Source:HGNC Symbol;Acc:HGNC:8955]	Serpin	5	3	35	73	0.0342129	0.0228432	0.42967	0.676917
ENSG00000196364	0	0	75.1453	12.5217	-8.19724	4.91035e-06	4.24162e-05	PRSS29P	16	1260952	1263845	-	1966	transcribed_unprocessed_pseudogene	serine protease 29, pseudogene [Source:HGNC Symbol;Acc:HGNC:17542]	-	0	0	54	12	0	0	1.38856	0.233075
ENSG00000254245	0	0	30.6147	43.8261	-7.97114	4.94423e-06	4.26932e-05	PCDHGA3	5	141343829	141512979	+	4876	protein_coding	protocadherin gamma subfamily A, 3 [Source:HGNC Symbol;Acc:HGNC:8701]	Cadherin	0	0	22	42	0	0	0.228093	0.328916
ENSG00000225431	0	0	43.1389	31.3043	-7.96645	4.94646e-06	4.26969e-05	LINC01671	21	42599280	42615058	-	1775	lincRNA	long intergenic non-protein coding RNA 1671 [Source:HGNC Symbol;Acc:HGNC:52459]	-	0	0	31	30	0	0	0.882911	0.645389
ENSG00000267702	0	0	26.44	49.0435	-7.99278	4.98651e-06	4.30269e-05	AP005131.6	18	13486462	13490676	+	4215	sense_intronic	-	-	0	0	19	47	0	0	0.227882	0.425794
ENSG00000172889	566.856	508.199	6552.94	1645.56	-2.93073	4.99577e-06	4.30911e-05	EGFL7	9	136658856	136672678	+	2553	protein_coding	EGF like domain multiple 7 [Source:HGNC Symbol;Acc:HGNC:20594]	EGF_CA	742	595	4709	1577	8.18954	7.30784	93.2463	23.5874
novel.525	86.3271	222.07	2374.03	547.826	-3.24434	5.0351e-06	4.33986e-05	-	CHR_HSCHR21_5_CTG2	46191427	46222347	-	4101	-	PF13249:Squalene-hopene cyclase N-terminal domain|PF13243:Squalene-hopene cyclase C-terminal domain	-	113	260	1706	525	0.776417	1.98795	21.0302	4.88842
ENSG00000160285	414.828	451.828	3214.55	1613.22	-2.47762	5.08087e-06	4.37771e-05	LSS	21	46188141	46228824	-	7238	protein_coding	lanosterol synthase [Source:HGNC Symbol;Acc:HGNC:6708]	-	543	529	2310	1546	2.11392	2.29171	16.1342	8.15623
ENSG00000213145	0	0	55.6632	21.913	-8.02255	5.15122e-06	4.43508e-05	CRIP1	14	105486317	105488947	+	2485	protein_coding	cysteine rich protein 1 [Source:HGNC Symbol;Acc:HGNC:2360]	-	0	0	40	21	0	0	0.813743	0.322695
ENSG00000188641	4.58374	0	50.0968	81.3913	-4.80561	5.19536e-06	4.46983e-05	DPYD	1	97077743	97995000	-	7131	protein_coding	dihydropyrimidine dehydrogenase [Source:HGNC Symbol;Acc:HGNC:3012]	DHO_dh	6	0	36	78	0.0237087	0	0.255215	0.417679
ENSG00000132334	19.0989	23.9153	190.646	135.652	-2.92348	5.27817e-06	4.53777e-05	PTPRE	10	127907061	128085855	+	11235	protein_coding	protein tyrosine phosphatase, receptor type E [Source:HGNC Symbol;Acc:HGNC:9669]	Y_phosphatase	25	28	137	130	0.0627008	0.0781461	0.616455	0.441844
ENSG00000283897	0	0	33.3979	39.6522	-7.94267	5.36888e-06	4.61239e-05	AC011416.3	5	127215159	127229809	-	2321	lincRNA	-	-	0	0	24	38	0	0	0.522745	0.625183
ENSG00000189196	0	0	30.6147	42.7826	-7.95062	5.37724e-06	4.61622e-05	LINC00994	3	64078361	64087363	-	2129	lincRNA	long intergenic non-protein coding RNA 994 [Source:HGNC Symbol;Acc:HGNC:48949]	-	0	0	22	41	0	0	0.522397	0.735372
ENSG00000160226	233.771	245.131	2172.25	844.174	-2.65463	5.44049e-06	4.66552e-05	C21orf2	21	44328944	44339402	-	6063	protein_coding	chromosome 21 open reading frame 2 [Source:HGNC Symbol;Acc:HGNC:1260]	-	306	287	1561	809	1.42213	1.48428	13.0157	5.09518
ENSG00000100346	1.52791	5.1247	94.6274	42.7826	-4.38347	5.47801e-06	4.69589e-05	CACNA1I	22	39570753	39689737	+	10792	protein_coding	calcium voltage-gated channel subunit alpha1 I [Source:HGNC Symbol;Acc:HGNC:1396]	Ion_trans	2	6	68	41	0.00522197	0.017433	0.318538	0.145071
ENSG00000250303	16.0431	17.0823	197.604	96	-3.14553	5.49639e-06	4.70834e-05	AP002884.1	11	112270749	112362534	+	5018	lincRNA	-	-	21	20	142	92	0.117922	0.124975	1.43058	0.700093
ENSG00000232229	0	0.854117	45.9221	94.9565	-7.4451	5.49652e-06	4.70834e-05	LINC00865	10	89829510	89840861	+	4272	lincRNA	long intergenic non-protein coding RNA 865 [Source:HGNC Symbol;Acc:HGNC:45170]	-	0	1	33	91	0	0.00733992	0.390514	0.813409
novel.471	105.426	111.889	1189.8	377.739	-2.84984	5.52163e-06	4.72813e-05	-	CHR_HSCHR17_7_CTG4	38505548	38530589	+	8358	-	PF13832:PHD-zinc-finger like domain|PF13831:PHD-finger	-	138	131	855	362	0.465247	0.491464	5.17151	1.65388
ENSG00000006016	79.4515	93.9528	779.284	342.261	-2.69258	5.52881e-06	4.73256e-05	CRLF1	19	18572220	18607741	-	3018	protein_coding	cytokine receptor like factor 1 [Source:HGNC Symbol;Acc:HGNC:2364]	-	104	110	560	328	0.971003	1.14287	9.38042	4.15005
ENSG00000219481	488.932	493.679	2554.94	2110.96	-2.24738	5.58977e-06	4.78128e-05	NBPF1	1	16562319	16613562	-	12212	protein_coding	NBPF member 1 [Source:HGNC Symbol;Acc:HGNC:26088]	-	640	578	1836	2023	1.47672	1.4841	7.60045	6.32569
ENSG00000170498	0	0	40.3558	32.3478	-7.93301	5.61635e-06	4.80228e-05	KISS1	1	204190341	204196486	-	709	protein_coding	KiSS-1 metastasis suppressor [Source:HGNC Symbol;Acc:HGNC:6341]	-	0	0	29	31	0	0	2.06779	1.66961
ENSG00000272070	2.29187	3.41647	76.5368	43.8261	-4.40236	5.62214e-06	4.80549e-05	AC005618.1	5	141326210	141329357	+	3148	lincRNA	-	-	3	4	55	42	0.026853	0.0398426	0.883246	0.509464
ENSG00000260018	37.4339	63.2046	651.259	194.087	-3.07031	5.68082e-06	4.85213e-05	AC040169.1	16	84117051	84117571	+	521	antisense	-	-	49	74	468	186	2.65012	4.45366	45.4111	13.6325
ENSG00000108679	285.72	198.155	2073.45	907.826	-2.62251	5.68448e-06	4.8535e-05	LGALS3BP	17	78971238	78980109	-	3584	protein_coding	galectin 3 binding protein [Source:HGNC Symbol;Acc:HGNC:6564]	SRCR	374	232	1490	870	2.94042	2.02975	21.0171	9.26937
ENSG00000148120	249.814	251.11	1177.28	1234.43	-2.26744	5.73e-06	4.88883e-05	C9orf3	9	94726701	95087218	+	10742	protein_coding	chromosome 9 open reading frame 3 [Source:HGNC Symbol;Acc:HGNC:1361]	-	327	294	846	1183	0.857766	0.858193	3.98143	4.20531
ENSG00000162889	2135.26	2259.99	14401.4	8154.78	-2.35947	5.80653e-06	4.94697e-05	MAPKAPK2	1	206684944	206734283	+	4195	protein_coding	mitogen-activated protein kinase-activated protein kinase 2 [Source:HGNC Symbol;Acc:HGNC:6887]	Pkinase	2795	2646	10349	7815	18.774	19.7779	124.715	71.137
ENSG00000259723	11.4593	20.4988	150.291	122.087	-3.09513	5.82773e-06	4.96324e-05	AL354993.2	20	53453058	53504314	-	542	antisense	-	-	15	24	108	117	0.779827	1.38846	10.0734	8.243
ENSG00000089159	1938.16	1992.65	11415.1	7647.65	-2.27782	5.83382e-06	4.96664e-05	PXN	12	120210439	120265771	-	7460	protein_coding	paxillin [Source:HGNC Symbol;Acc:HGNC:9718]	LIM	2537	2333	8203	7329	9.5827	9.80615	55.5888	37.515
ENSG00000120451	382.742	402.289	1925.95	1778.09	-2.23826	5.83821e-06	4.96859e-05	SNX19	11	130875436	130916509	-	8152	protein_coding	sorting nexin 19 [Source:HGNC Symbol;Acc:HGNC:21532]	PX	501	471	1384	1704	1.73173	1.81167	8.58273	7.98186
ENSG00000030582	3550.87	3507	45538	10032	-2.97697	5.8788e-06	5.00132e-05	GRN	17	44345086	44353102	+	3680	protein_coding	granulin precursor [Source:HGNC Symbol;Acc:HGNC:4601]	-	4648	4106	32724	9614	35.5897	34.986	449.544	99.7597
ENSG00000226738	0	0	57.0547	19.8261	-8.00904	5.93136e-06	5.04422e-05	U62317.1	22	50546415	50547652	+	157	processed_transcript	-	-	0	0	41	19	0	0	13.2019	4.62118
ENSG00000198890	2524.11	2443.63	15933.6	9248.35	-2.34168	5.94809e-06	5.05663e-05	PRMT6	1	107056679	107059294	+	2616	protein_coding	protein arginine methyltransferase 6 [Source:HGNC Symbol;Acc:HGNC:18241]	-	3304	2861	11450	8863	35.5884	34.2928	221.269	129.372
ENSG00000166016	363.643	421.079	3423.28	1361.74	-2.60806	6.12003e-06	5.19345e-05	ABTB2	11	34150988	34358008	-	4973	protein_coding	ankyrin repeat and BTB domain containing 2 [Source:HGNC Symbol;Acc:HGNC:23842]	BTB	476	493	2460	1305	2.69709	3.1085	25.0075	10.0205
ENSG00000114654	0	0.854117	93.2358	44.8696	-7.40872	6.28891e-06	5.32719e-05	EFCC1	3	129001629	129040742	+	2945	protein_coding	EF-hand and coiled-coil domain containing 1 [Source:HGNC Symbol;Acc:HGNC:25692]	-	0	1	67	43	0	0.0106472	1.15012	0.557548
ENSG00000169908	0	0	38.9642	32.3478	-7.90537	6.3157e-06	5.34793e-05	TM4SF1	3	149369022	149377865	-	3668	protein_coding	transmembrane 4 L six family member 1 [Source:HGNC Symbol;Acc:HGNC:11853]	-	0	0	28	31	0	0	0.385907	0.322724
ENSG00000111424	263.565	306.628	1891.16	1111.3	-2.39643	6.4083e-06	5.41666e-05	VDR	12	47841537	47943048	-	5674	protein_coding	vitamin D receptor [Source:HGNC Symbol;Acc:HGNC:12679]	zf-C4	345	359	1359	1065	1.71331	1.98394	12.1083	7.16736
ENSG00000170545	150.499	193.884	787.634	957.913	-2.34217	6.44352e-06	5.44252e-05	SMAGP	12	51244558	51270890	-	3558	protein_coding	small cell adhesion glycoprotein [Source:HGNC Symbol;Acc:HGNC:26918]	-	197	227	566	918	1.56015	2.00052	8.042	9.85225
ENSG00000135404	4084.88	3986.16	26142.2	14798.6	-2.34269	6.45577e-06	5.44911e-05	CD63	12	55725323	55729707	-	2633	protein_coding	CD63 molecule [Source:HGNC Symbol;Acc:HGNC:1692]	Tetraspannin	5347	4667	18786	14182	57.2224	55.5788	360.693	205.677
ENSG00000275880	3.81978	4.27058	68.1874	60.5217	-3.99287	6.46628e-06	5.4559e-05	AL139385.1	13	110613082	110616353	-	3272	antisense	-	-	5	5	49	58	0.0430589	0.0479159	0.757071	0.676883
ENSG00000215068	12.9873	12.8117	111.326	113.739	-3.12494	6.52802e-06	5.50013e-05	AC025171.2	5	43041575	43045390	+	2773	antisense	-	-	17	15	80	109	0.172745	0.169615	1.45846	1.50098
ENSG00000236204	3.05583	3.41647	44.5305	78.2608	-4.25144	6.53707e-06	5.50579e-05	LINC01376	2	18986451	19346748	-	2963	lincRNA	long intergenic non-protein coding RNA 1376 [Source:HGNC Symbol;Acc:HGNC:50637]	-	4	4	32	75	0.0380395	0.0423303	0.545974	0.966559
ENSG00000278231	0	0	36.181	34.4348	-7.89219	6.62277e-06	5.57597e-05	AL133342.1	20	48821688	48849458	-	366	lincRNA	-	-	0	0	26	33	0	0	3.59125	3.44296
ENSG00000188833	9.16748	6.83293	190.646	41.7391	-3.85281	6.6339e-06	5.58136e-05	ENTPD8	9	137434364	137441816	-	2836	protein_coding	ectonucleoside triphosphate diphosphohydrolase 8 [Source:HGNC Symbol;Acc:HGNC:24860]	-	12	8	137	40	0.119229	0.0884517	2.44213	0.538583
ENSG00000126878	1109.26	1179.53	5992.14	4671.65	-2.22002	6.66727e-06	5.60744e-05	AIF1L	9	131096476	131123152	+	5299	protein_coding	allograft inflammatory factor 1 like [Source:HGNC Symbol;Acc:HGNC:28904]	-	1452	1381	4306	4477	7.7211	8.17189	41.0803	32.2621
ENSG00000137936	172.654	180.219	1045.08	746.087	-2.34337	6.67714e-06	5.61375e-05	BCAR3	1	93561786	93847150	-	5042	protein_coding	BCAR3, NSP family adaptor protein [Source:HGNC Symbol;Acc:HGNC:973]	SH2	226	211	751	715	1.26303	1.31221	7.52993	5.41504
ENSG00000269834	0	0	32.0063	38.6087	-7.89388	6.68458e-06	5.618e-05	ZNF528-AS1	19	52388842	52397766	-	4160	processed_transcript	ZNF528 antisense RNA 1 [Source:HGNC Symbol;Acc:HGNC:51305]	-	0	0	23	37	0	0	0.279504	0.339631
ENSG00000235277	0	0	44.5305	27.1304	-7.91033	6.69912e-06	5.62821e-05	AF127577.3	21	14918534	14947096	+	781	antisense	-	-	0	0	32	26	0	0	2.07135	1.27122
novel.667	12.9873	13.6659	186.472	76.1739	-3.2977	6.70156e-06	5.62826e-05	-	CHR_HSCHR6_MHC_QBL_CTG1	31888187	31893388	-	4691	-	PF00651:BTB/POZ domain|PF00096:Zinc finger, C2H2 type	BTB	17	16	134	73	0.102115	0.106949	1.44409	0.594232
ENSG00000267259	0.763957	0	50.0968	82.4348	-7.36674	6.84381e-06	5.7416e-05	ERVE-1	17	28232590	28235281	-	2692	lincRNA	endogenous retrovirus group E member 1 [Source:HGNC Symbol;Acc:HGNC:14602]	-	1	0	36	79	0.0104672	0	0.676054	1.1206
ENSG00000108691	0.763957	0	65.4042	64.6956	-7.33698	6.85438e-06	5.74843e-05	CCL2	17	34255218	34257203	+	1986	protein_coding	C-C motif chemokine ligand 2 [Source:HGNC Symbol;Acc:HGNC:10618]	-	1	0	47	62	0.0141882	0	1.19639	1.1921
ENSG00000134202	1181.08	1117.18	5230.94	5185.04	-2.18017	6.91922e-06	5.79663e-05	GSTM3	1	109733932	109741038	-	4750	protein_coding	glutathione S-transferase mu 3 [Source:HGNC Symbol;Acc:HGNC:4635]	GST_N	1546	1308	3759	4969	9.17112	8.63449	40.0067	39.9461
ENSG00000214357	217.728	206.696	1221.81	889.043	-2.31389	7.0349e-06	5.88727e-05	NEURL1B	5	172641266	172691540	+	6424	protein_coding	neuralized E3 ubiquitin protein ligase 1B [Source:HGNC Symbol;Acc:HGNC:35422]	-	285	242	878	852	1.2501	1.18122	6.90944	5.06446
ENSG00000197119	1016.06	909.634	8002.97	3256.69	-2.54757	7.15947e-06	5.9894e-05	SLC25A29	14	100291111	100306547	-	7451	protein_coding	solute carrier family 25 member 29 [Source:HGNC Symbol;Acc:HGNC:20116]	Mito_carr	1330	1065	5751	3121	5.02972	4.48185	39.0196	15.9948
novel.421	0	0	59.8379	16.6956	-8.00179	7.17667e-06	5.99953e-05	-	CHR_HSCHR16_5_CTG1	2853058	2860660	-	5553	-	PF00089:Trypsin	Trypsin	0	0	43	16	0	0	0.391466	0.110025
ENSG00000187210	239.118	226.341	910.093	1505.74	-2.37612	7.19858e-06	6.01572e-05	GCNT1	9	76419850	76507416	+	6463	protein_coding	glucosaminyl (N-acetyl) transferase 1, core 2 [Source:HGNC Symbol;Acc:HGNC:4203]	-	313	265	654	1443	1.36464	1.28568	5.11561	8.52572
ENSG00000007944	309.402	374.103	1505.69	1748.87	-2.25168	7.21489e-06	6.02721e-05	MYLIP	6	16129125	16148248	+	3033	protein_coding	myosin regulatory light chain interacting protein [Source:HGNC Symbol;Acc:HGNC:21155]	-	405	438	1082	1676	3.76261	4.52819	18.0347	21.1009
novel.64	22.9187	9.39528	161.423	126.261	-3.14675	7.24071e-06	6.0445e-05	-	16	712501	715007	+	2507	-	-	-	30	11	116	121	0.337189	0.137582	2.33915	1.84302
novel.340	2.29187	6.83293	112.718	43.8261	-4.11107	7.24382e-06	6.04497e-05	-	CHR_HSCHR11_1_CTG8	612492	616264	-	2294	-	PF10401:Interferon-regulatory factor 3|PF00605:Interferon regulatory factor transcription factor	IRF	3	8	81	42	0.0368497	0.10935	1.78503	0.699125
ENSG00000137868	19.8629	23.0611	265.792	102.261	-3.09813	7.248e-06	6.04527e-05	STRA6	15	74179466	74212267	-	7690	protein_coding	stimulated by retinoic acid 6 [Source:HGNC Symbol;Acc:HGNC:30650]	-	26	27	191	98	0.0952694	0.110093	1.25563	0.48663
ENSG00000106327	2.29187	0	86.2779	28.1739	-5.5866	7.24931e-06	6.04527e-05	TFR2	7	100620416	100642779	-	5065	protein_coding	transferrin receptor 2 [Source:HGNC Symbol;Acc:HGNC:11762]	-	3	0	62	27	0.0166897	0	0.618822	0.203556
ENSG00000170786	0	1.70823	45.9221	57.3913	-5.98042	7.33148e-06	6.10517e-05	SDR16C5	8	56300010	56320776	-	3279	protein_coding	short chain dehydrogenase/reductase family 16C member 5 [Source:HGNC Symbol;Acc:HGNC:30311]	adh_short	0	2	33	55	0	0.0191254	0.508776	0.640501
ENSG00000157593	1274.28	1299.97	8462.19	4671.65	-2.35099	7.41666e-06	6.17393e-05	SLC35B2	6	44254096	44257890	-	2363	protein_coding	solute carrier family 35 member B2 [Source:HGNC Symbol;Acc:HGNC:16872]	-	1668	1522	6081	4477	19.8902	20.1964	130.096	72.3473
ENSG00000160446	757.081	751.623	7077.57	2428.17	-2.65534	7.4259e-06	6.17944e-05	ZDHHC12	9	128720869	128724127	-	2597	protein_coding	zinc finger DHHC-type containing 12 [Source:HGNC Symbol;Acc:HGNC:19159]	-	991	880	5086	2327	10.7525	10.6251	99.0052	34.2155
ENSG00000267868	0	1.70823	65.4042	39.6522	-5.99969	7.44715e-06	6.19494e-05	AL356740.1	13	112964835	112966131	-	1297	lincRNA	-	-	0	2	47	38	0	0.0483518	1.83194	1.11877
ENSG00000184441	42.0176	37.5811	347.895	183.652	-2.73719	7.5041e-06	6.24012e-05	AP001062.1	21	44331234	44335851	+	4354	antisense	-	-	55	44	250	176	0.355943	0.316874	2.90272	1.54356
ENSG00000166401	0.763957	0.854117	33.3979	69.913	-6.00444	7.50943e-06	6.24234e-05	SERPINB8	18	63969925	64019779	+	5868	protein_coding	serpin family B member 8 [Source:HGNC Symbol;Acc:HGNC:8952]	Serpin	1	1	24	67	0.00480194	0.00534358	0.206764	0.435997
ENSG00000196943	49.6572	36.727	457.829	178.435	-2.87788	7.54609e-06	6.27061e-05	NOP9	14	24299862	24309124	+	6033	protein_coding	NOP9 nucleolar protein [Source:HGNC Symbol;Acc:HGNC:19826]	-	65	43	329	171	0.303589	0.22349	2.75687	1.08233
ENSG00000126233	0	0	82.1032	7.30435	-8.2255	7.55662e-06	6.27716e-05	SLURP1	8	142740944	142742411	-	537	protein_coding	secreted LY6/PLAUR domain containing 1 [Source:HGNC Symbol;Acc:HGNC:18746]	-	0	0	59	7	0	0	5.55433	0.497763
ENSG00000172354	5044.4	4845.4	38570.4	16709.2	-2.48271	7.57664e-06	6.29157e-05	GNB2	7	100673531	100679174	+	2857	protein_coding	G protein subunit beta 2 [Source:HGNC Symbol;Acc:HGNC:4398]	WD40	6603	5673	27717	16013	65.1235	62.2623	490.444	214.023
ENSG00000198758	0	0	40.3558	29.2174	-7.86879	7.62213e-06	6.32712e-05	EPS8L3	1	109750080	109764027	-	3477	protein_coding	EPS8 like 3 [Source:HGNC Symbol;Acc:HGNC:21297]	SH3_1	0	0	29	28	0	0	0.421645	0.307505
ENSG00000078596	0	0	27.8316	41.7391	-7.87388	7.7161e-06	6.40062e-05	ITM2A	X	79360384	79367667	-	2051	protein_coding	integral membrane protein 2A [Source:HGNC Symbol;Acc:HGNC:6173]	-	0	0	20	40	0	0	0.492967	0.74472
ENSG00000186162	126.053	122.993	912.876	487.304	-2.49034	7.72703e-06	6.40744e-05	CIDECP	3	10014238	10026365	-	3017	transcribed_unprocessed_pseudogene	cell death-inducing DFFA-like effector c pseudogene [Source:HGNC Symbol;Acc:HGNC:24230]	-	165	144	656	467	1.54104	1.49661	10.9921	5.91072
ENSG00000183111	57.2967	61.4964	438.347	266.087	-2.56711	7.82338e-06	6.4805e-05	ARHGEF37	5	149551947	149634968	+	5324	protein_coding	Rho guanine nucleotide exchange factor 37 [Source:HGNC Symbol;Acc:HGNC:34430]	RhoGEF	75	72	315	255	0.396944	0.42405	2.99107	1.82895
ENSG00000226508	3.81978	3.41647	87.6695	41.7391	-4.15419	7.84146e-06	6.4932e-05	LINC01918	2	105144113	105145424	+	1009	lincRNA	long intergenic non-protein coding RNA 1918 [Source:HGNC Symbol;Acc:HGNC:52737]	-	5	4	63	40	0.139632	0.124306	3.15648	1.5138
ENSG00000158480	473.653	422.788	3193.67	1617.39	-2.42378	7.88956e-06	6.52845e-05	SPATA2	20	49903391	49915508	-	4270	protein_coding	spermatogenesis associated 2 [Source:HGNC Symbol;Acc:HGNC:14681]	-	620	495	2295	1550	4.09138	3.63496	27.1712	13.8613
ENSG00000123395	392.674	435.599	3932.6	1337.74	-2.66949	8.09287e-06	6.69199e-05	ATG101	12	52069246	52077494	+	3199	protein_coding	autophagy related 101 [Source:HGNC Symbol;Acc:HGNC:25679]	-	514	510	2826	1282	4.52747	4.99895	44.6593	15.3029
ENSG00000171621	129.873	110.181	861.387	478.956	-2.48015	8.1183e-06	6.71067e-05	SPSB1	1	9292880	9369532	+	3403	protein_coding	splA/ryanodine receptor domain and SOCS box containing 1 [Source:HGNC Symbol;Acc:HGNC:30628]	SPRY	170	129	619	459	1.40765	1.18864	9.19565	5.1505
ENSG00000279631	0	0	26.44	42.7826	-7.86714	8.16086e-06	6.7435e-05	AL158211.5	10	22252072	22254589	+	2518	TEC	-	-	0	0	19	41	0	0	0.381462	0.621766
ENSG00000254986	1276.57	1311.92	10054.2	4373.22	-2.47854	8.30868e-06	6.85604e-05	DPP3	11	66480013	66509657	+	3977	protein_coding	dipeptidyl peptidase 3 [Source:HGNC Symbol;Acc:HGNC:3008]	-	1671	1536	7225	4191	11.8393	12.1104	91.8409	40.2403
ENSG00000260284	0	0.854117	125.242	24	-7.51745	8.46263e-06	6.97333e-05	TPSP2	16	1286351	1288837	-	610	unprocessed_pseudogene	tryptase pseudogene 2 [Source:HGNC Symbol;Acc:HGNC:14136]	Trypsin	0	1	90	23	0	0.0514035	7.45876	1.43978
ENSG00000167644	0.763957	0.854117	66.7958	34.4348	-5.96628	8.47936e-06	6.98467e-05	C19orf33	19	38304161	38305009	+	617	protein_coding	chromosome 19 open reading frame 33 [Source:HGNC Symbol;Acc:HGNC:16668]	-	1	1	48	33	0.045669	0.0508203	3.93287	2.04234
ENSG00000278869	0	0	48.7053	21.913	-7.88744	8.50845e-06	7.00375e-05	BX539320.1	22	49933198	49934074	-	877	lincRNA	-	-	0	0	35	21	0	0	2.01754	0.914363
novel.107	0	0	33.3979	34.4348	-7.83476	8.54163e-06	7.02861e-05	-	2	236777316	236781693	+	1978	-	-	-	0	0	24	33	0	0	0.613393	0.637069
novel.674	17.571	18.7906	633.168	29.2174	-4.18574	8.55323e-06	7.0357e-05	-	CHR_HSCHR6_MHC_SSTO_CTG1	30335117	30336486	+	420	-	PF04032:RNAse P Rpr2/Rpp21/SNM1 subunit domain	-	23	22	455	28	1.54307	1.64246	54.7666	2.5457
ENSG00000111058	141.332	137.513	655.434	710.608	-2.29254	8.56679e-06	7.0444e-05	ACSS3	12	80936414	81261205	+	14301	protein_coding	acyl-CoA synthetase short chain family member 3 [Source:HGNC Symbol;Acc:HGNC:24723]	-	185	161	471	681	0.364512	0.353006	1.66498	1.81836
ENSG00000123989	1796.83	1711.65	16888.2	5436.52	-2.66966	8.57332e-06	7.04732e-05	CHPF	2	219538947	219543787	-	3354	protein_coding	chondroitin polymerizing factor [Source:HGNC Symbol;Acc:HGNC:24291]	-	2352	2004	12136	5210	19.7597	18.7352	182.922	59.3162
ENSG00000130164	1404.15	1382.81	11498.6	4584	-2.52865	8.62865e-06	7.08786e-05	LDLR	19	11089362	11133816	+	7718	protein_coding	low density lipoprotein receptor [Source:HGNC Symbol;Acc:HGNC:6547]	Ldl_recept_a	1838	1619	8263	4393	6.71038	6.57756	54.1236	21.7348
ENSG00000111341	0	0.854117	27.8316	113.739	-7.45282	8.74007e-06	7.17439e-05	MGP	12	14881181	14885926	-	2639	protein_coding	matrix Gla protein [Source:HGNC Symbol;Acc:HGNC:7060]	-	0	1	20	109	0	0.0118818	0.383128	1.5772
ENSG00000250486	0	0	16.6989	56.3478	-7.94809	8.75723e-06	7.18598e-05	FAM218A	4	164956948	164959122	+	2175	protein_coding	family with sequence similarity 218 member A [Source:HGNC Symbol;Acc:HGNC:26466]	-	0	0	12	54	0	0	0.278917	0.948055
ENSG00000139998	1104.68	1089.85	6440.23	4090.43	-2.26252	9.01204e-06	7.3848e-05	RAB15	14	64945814	64973226	-	5015	protein_coding	RAB15, member RAS oncogene family [Source:HGNC Symbol;Acc:HGNC:20150]	Ras	1446	1276	4628	3920	8.12463	7.97815	46.6526	29.8479
ENSG00000187796	93.2027	95.6611	858.604	342.261	-2.66765	9.04191e-06	7.40414e-05	CARD9	9	136361903	136373681	-	6699	protein_coding	caspase recruitment domain family member 9 [Source:HGNC Symbol;Acc:HGNC:16391]	CARD	122	112	617	328	0.513164	0.524241	4.65617	1.86966
ENSG00000168890	142.096	164.844	1422.19	524.869	-2.66475	9.07608e-06	7.4291e-05	TMEM150A	2	85598548	85603196	-	3094	protein_coding	transmembrane protein 150A [Source:HGNC Symbol;Acc:HGNC:24677]	-	186	193	1022	503	1.69394	1.95596	16.6988	6.20793
ENSG00000146540	1540.14	1583.53	10282.4	5532.52	-2.3399	9.07868e-06	7.4291e-05	C7orf50	7	996986	1138260	-	4961	protein_coding	chromosome 7 open reading frame 50 [Source:HGNC Symbol;Acc:HGNC:22421]	-	2016	1854	7389	5302	11.4506	11.7183	75.2957	40.8103
ENSG00000198373	955.71	985.65	6379	3460.17	-2.34136	9.20578e-06	7.51227e-05	WWP2	16	69762306	69941741	+	9015	protein_coding	WW domain containing E3 ubiquitin protein ligase 2 [Source:HGNC Symbol;Acc:HGNC:16804]	HECT	1251	1154	4584	3316	3.91019	4.01386	25.7059	14.0458
ENSG00000253485	0	0.854117	83.4947	43.8261	-7.29152	9.37048e-06	7.63348e-05	PCDHGA5	5	141364232	141512979	+	5733	protein_coding	protocadherin gamma subfamily A, 5 [Source:HGNC Symbol;Acc:HGNC:8703]	Cadherin	0	1	60	42	0	0.00546941	0.529082	0.279747
ENSG00000174939	80.2154	60.6423	676.307	266.087	-2.74012	9.38084e-06	7.63928e-05	ASPHD1	16	29900375	29919864	+	2312	protein_coding	aspartate beta-hydroxylase domain containing 1 [Source:HGNC Symbol;Acc:HGNC:27380]	-	105	71	486	255	1.2797	0.962926	10.6268	4.21164
ENSG00000105327	142.86	139.221	1110.48	515.478	-2.52634	9.4409e-06	7.67957e-05	BBC3	19	47220822	47232766	-	3180	protein_coding	BCL2 binding component 3 [Source:HGNC Symbol;Acc:HGNC:17868]	-	187	163	798	494	1.65699	1.60725	12.6861	5.93197
ENSG00000235343	0	0	40.3558	27.1304	-7.82432	9.44332e-06	7.67957e-05	LINC01665	22	16746869	16748645	-	1241	lincRNA	long intergenic non-protein coding RNA 1665 [Source:HGNC Symbol;Acc:HGNC:52453]	-	0	0	29	26	0	0	1.18135	0.800019
ENSG00000101417	189.461	207.55	1078.47	840	-2.27256	9.45191e-06	7.68307e-05	PXMP4	20	33702754	33720319	-	5723	protein_coding	peroxisomal membrane protein 4 [Source:HGNC Symbol;Acc:HGNC:15920]	-	248	243	775	805	1.22105	1.33139	6.84592	5.3712
ENSG00000242193	0	0	25.0484	42.7826	-7.83819	9.45413e-06	7.68307e-05	CRYZL2P	1	178006136	178037950	-	5499	transcribed_unitary_pseudogene	crystallin zeta like 2, pseudogene [Source:HGNC Symbol;Acc:HGNC:52164]	-	0	0	18	41	0	0	0.165479	0.284708
ENSG00000104964	1843.43	1862.83	16810.3	5799.65	-2.60886	9.50581e-06	7.71975e-05	AES	19	3052910	3063107	-	5298	protein_coding	amino-terminal enhancer of split [Source:HGNC Symbol;Acc:HGNC:307]	-	2413	2181	12080	5558	12.8337	12.9082	115.268	40.0595
ENSG00000132801	55.0049	60.6423	489.836	236.869	-2.65051	9.54265e-06	7.74701e-05	ZSWIM3	20	45857617	45879122	+	2773	protein_coding	zinc finger SWIM-type containing 3 [Source:HGNC Symbol;Acc:HGNC:16157]	SWIM	72	71	352	227	0.731626	0.802844	6.41721	3.1259
ENSG00000229676	0	0.854117	25.0484	116.87	-7.45626	9.61105e-06	7.79985e-05	ZNF492	19	22634324	22667670	+	4245	protein_coding	zinc finger protein 492 [Source:HGNC Symbol;Acc:HGNC:23707]	zf-C2H2	0	1	18	112	0	0.00738661	0.214362	1.00749
ENSG00000120149	417.884	425.35	1892.55	1921.04	-2.17717	9.74821e-06	7.90302e-05	MSX2	5	174724533	174730893	+	2270	protein_coding	msh homeobox 2 [Source:HGNC Symbol;Acc:HGNC:7392]	Homeobox	547	498	1360	1841	6.78997	6.87901	30.2877	30.969
ENSG00000273136	143.624	167.407	886.436	660.522	-2.31418	9.77646e-06	7.92048e-05	NBPF26	1	120723923	120841481	+	6032	protein_coding	NBPF member 26 [Source:HGNC Symbol;Acc:HGNC:49571]	EGF_CA	188	196	637	633	0.878219	1.01887	5.33865	4.0072
ENSG00000111077	122.997	147.762	1153.62	483.13	-2.59524	9.84811e-06	7.97032e-05	TNS2	12	53046969	53064372	+	8093	protein_coding	tensin 2 [Source:HGNC Symbol;Acc:HGNC:19737]	SH2	161	173	829	463	0.560561	0.670284	5.17844	2.18459
ENSG00000168310	80.2154	98.2234	429.998	494.609	-2.37421	9.9032e-06	8.01216e-05	IRF2	4	184387713	184474580	-	3116	protein_coding	interferon regulatory factor 2 [Source:HGNC Symbol;Acc:HGNC:6117]	IRF	105	115	309	474	0.949507	1.15724	5.0132	5.80871
ENSG00000228594	530.95	537.239	3949.3	1830.26	-2.43558	1.00588e-05	8.13245e-05	FNDC10	1	1598012	1600096	-	2085	protein_coding	fibronectin type III domain containing 10 [Source:HGNC Symbol;Acc:HGNC:42951]	-	695	629	2838	1754	9.39259	9.45948	68.8113	32.1235
ENSG00000261116	22.1547	25.6235	68.1874	481.043	-3.52595	1.01815e-05	8.22325e-05	AL049555.1	6	54943167	54945099	+	1933	sense_overlapping	-	-	29	30	49	461	0.422739	0.486645	1.2815	9.10684
ENSG00000148411	1016.83	830.201	6171.65	3292.17	-2.35705	1.02389e-05	8.26672e-05	NACC2	9	136006537	136095285	-	7212	protein_coding	NACC family member 2 [Source:HGNC Symbol;Acc:HGNC:23846]	BTB	1331	972	4435	3155	5.2003	4.22604	31.0879	16.7048
ENSG00000105388	0	0.854117	77.9284	45.913	-7.2521	1.0317e-05	8.32414e-05	CEACAM5	19	41708585	41729798	+	3351	protein_coding	carcinoembryonic antigen related cell adhesion molecule 5 [Source:HGNC Symbol;Acc:HGNC:1817]	V-set	0	1	56	44	0	0.00935725	0.844826	0.501392
ENSG00000238117	0	0	25.0484	41.7391	-7.81569	1.03248e-05	8.3276e-05	AP000844.2	11	131877680	131897108	-	509	antisense	-	-	0	0	18	40	0	0	1.78776	3.00083
ENSG00000166473	25.2106	12.8117	169.773	130.435	-2.97525	1.0397e-05	8.38295e-05	PKD1L2	16	81100875	81220370	-	18637	polymorphic_pseudogene	polycystin 1 like 2 (gene/pseudogene) [Source:HGNC Symbol;Acc:HGNC:21715]	Lectin_C	33	15	122	125	0.0498935	0.025237	0.330931	0.256114
ENSG00000255398	2.29187	0.854117	65.4042	35.4783	-4.97741	1.04914e-05	8.45036e-05	HCAR3	12	122714756	122716892	-	2137	protein_coding	hydroxycarboxylic acid receptor 3 [Source:HGNC Symbol;Acc:HGNC:16824]	7tm_1	3	1	47	34	0.039557	0.014673	1.11185	0.607538
ENSG00000266869	0	0.854117	51.4884	69.913	-7.2285	1.05155e-05	8.46689e-05	AC005993.1	14	71848606	71908430	+	397	lincRNA	-	-	0	1	37	67	0	0.0789827	4.71156	6.44441
[truncated: 2,265 more rows]
